# Supplementary material for: SARS-CoV-2 Requires Cholesterol for Viral Entry and Pathological Syncytia Formation
Source: bioRxiv preprint, doi:10.1101/2020.12.14.422737, version 1 (2020-12-14)
Supplement: TableS1_Compund_Screen [file 422737_file03.xlsx]

## Sheet: Description of Table S1
Table S1, Related to Figure 4. Unbiased Drug Repurposing Screen Raw Data.
Table S1A tab displays compounds with no detectable toxicity (n=5747) at 30 uM
Table S1B tab displays compounds with significant toxicity and/or autofluorescence (n=732) at 30 uM
"Hit" refers to compound with fusion score Z-factor <= 3
Color Coding Legend
Compound reduced fusion (z-score<-3; no toxicity, passed fluorescence quality control) (n=162)
Compound increased fusion (z-score>4; no toxiciy, passed fluorescence quality control) (n=150)
Compound passed validation (dose dependent effect on fusion)
Compound failed validation (no dose dependent effect on fusion)
Sham control (no compound added to well)

## Sheet: Table S1A
Library	Cells	Fusion Z-Score	Hit?	QC?	NonToxic?	Compound Name	Vendor Description of Compound	Compound SMILES Identifier
pfizer	848	-18.3823	TRUE	TRUE	TRUE	UK-356618	Metalloproteinase inhibitor	C[C@@H](NC(=O)[C@@H](NC(=O)[C@H](CCCC1=CC=C(C(C)=C1)C1=CC=CC=C1)CC(=O)NO)C(C)(C)C)C1=CC=CC=C1
14030	856	-18.0276	TRUE	TRUE	TRUE	IVERMECTIN	antiparasitic; macrocyclic lactone of ivermectin class	CCC(C)[C@H]1O[C@]2(CC[C@@H]1C)C[C@@H]1C[C@@H](C\C=C(C)\[C@@H](OC3C[C@H](OC)C(O[C@H]4C[C@H](OC)[C@@H](O)[C@H](C)O4)[C@H](C)O3)[C@@H](C)\C=C\C=C3/CO[C@@H]4[C@H](O)C(C)=C[C@@H](C(=O)O1)[C@]34O)O2
LOPAC	904	-17.0446	TRUE	TRUE	TRUE	AMG 9810	Potent, non-vanilloid, antagonist of the TRPV1 receptor.	CC(C)(C)C1=CC=C(\C=C\C(=O)NC2=CC3=C(OCCO3)C=C2)C=C1
14030	864	-16.682	TRUE	TRUE	TRUE	EPRINOMECTIN	antiparasitic; macrocyclic lactone of ivermectin class	CCC(C)[C@H]1O[C@@]2(C[C@@H]3C[C@@H](C\C=C(C)\[C@@H](OC4C[C@H](OC)C(O[C@H]5C[C@H](OC)[C@@H](NC(C)=O)[C@H](C)O5)[C@H](C)O4)[C@@H](C)\C=C\C=C4/CO[C@@H]5[C@H](O)C(C)=C[C@@H](C(=O)O3)[C@]45O)O2)C=C[C@@H]1C
LOPAC	693	-16.3943	TRUE	TRUE	TRUE	Ritanserin	Potent 5-HT2 serotonin receptor antagonist which passes the blood-brain barrier	CC1=C(CCN2CCC(CC2)=C(C2=CC=C(F)C=C2)C2=CC=C(F)C=C2)C(=O)N2C=CSC2=N1
L1200	676	-16.0868	TRUE	TRUE	TRUE	RAF265 (CHIR-265)	RAF265 (CHIR-265) is a potent selective inhibitor of C-Raf/B-Raf/B-Raf V600E with IC50 of 3-60 nM, and exhibits potent inhibition on VEGFR2 phosphorylation with EC50 of 30 nM. Phase 2.	C12=C(C=CC(=C1)OC3=CC=NC(=C3)C4NC(=CN=4)C(F)(F)F)N(C(=N2)NC5=CC=C(C=C5)C(F)(F)F)C
TM-L4	943	-15.9595	TRUE	TRUE	TRUE	Ticagrelor	Ticagrelor is an inhibitor of platelet aggregation. Unlike clopidogrel, ticagrelor is not a prodrug required metabolic activation.	CCCSc1nc2c(nnn2[C@@H]2C[C@H](OCCO)[C@@H](O)[C@H]2O)c(N[C@@H]2C[C@H]2c2cc(F)c(F)cc2)n1
TM-L4	927	-15.8217	TRUE	TRUE	TRUE	Tacrolimus	Tacrolimus can bind FKBP12 to form a high-affinity complex (Ki: 0.2 nM) which inhibits the activity of the calcium/calmodulin-dependent protein phosphatase; mTOR signaling inhibitor	CO[C@@H]1C[C@@H](CC[C@H]1O)\C=C(/C)[C@H]1OC(=O)[C@@H]2CCCCN2C(=O)C(=O)[C@]2(O)O[C@@H]([C@H](C[C@H]2C)OC)[C@H](C[C@@H](C)C\C(C)=C\[C@@H](CC=C)C(=O)C[C@H](O)[C@H]1C)OC
L1200	852	-15	TRUE	TRUE	TRUE	TAK-285	TAK-285 is a novel dual HER2 and EGFR(HER1) inhibitor with IC50 of 17 nM and 23 nM, >10-fold selectivity for HER1/2 than HER4, less potent to MEK1/5, c-Met, Aurora B, Lck, CSK etc. Phase 1.	C12=C(C(=NC=N1)NC3=CC=C(C(=C3)Cl)OC4=CC=CC(=C4)C(F)(F)F)N(C=C2)CCNC(=O)CC(O)(C)C
14030	839	-14.1723	TRUE	TRUE	TRUE	TACROLIMUS	Tacrolimus can bind FKBP12 to form a high-affinity complex (Ki: 0.2 nM) which inhibits the activity of the calcium/calmodulin-dependent protein phosphatase; mTOR signaling inhibitor	CO[C@@H]1CC(CC[C@H]1O)\C=C(/C)[C@H]1OC(=O)[C@@H]2CCCCN2C(=O)C(=O)[C@]2(O)O[C@@H]([C@H](C[C@H]2C)OC)[C@H](C[C@@H](C)C\C(C)=C\[C@@H](CC=C)C(=O)C[C@H](O)[C@H]1C)OC
LOPAC	878	-13.4415	TRUE	TRUE	TRUE	JFD00244	A SIRT (sirtuin, human silent information regulator) inhibitor.	OC1=CC=C(CCNC2=CC=C(NCCC3=CC=C(O)C=C3)C3=C2C(=O)C2=CC=CC=C2C3=O)C=C1
TM-L4	894	-13.1242	TRUE	TRUE	TRUE	Rolapitant hydrochloride	Rolapitant Hydrochloride is an orally bioavailable, centrally-acting, selective, neurokinin 1 receptor (NK1-receptor) antagonist with potential antiemetic activity.	Cl.C[C@@H](OC[C@]1(CC[C@]2(CCC(=O)N2)CN1)c1ccccc1)c1cc(cc(c1)C(F)(F)F)C(F)(F)F
TM-L4	821	-12.9748	TRUE	TRUE	TRUE	Chlorhexidine Acetate	Chlorhexidine acetate is a disinfectant and topical anti-infective agent used also as mouthwash to prevent oral plaque.	c1(NC(=N)NC(=N)NCCCCCCNC(=N)NC(=N)Nc2ccc(cc2)Cl)ccc(cc1)Cl.C(=O)(C)O.C(=O)(C)O
L2300	761	-12.292	TRUE	TRUE	TRUE	SKI II	Selective non-lipid inhibitor of sphingosine kinase	C1(C2=CC=C(C=C2)Cl)N=C(NC3=CC=C(C=C3)O)SC=1
L1200	652	-12.2771	TRUE	TRUE	TRUE	Sorafenib Tosylate	Sorafenib Tosylate (Bay 43-9006) is a multikinase inhibitor of Raf-1, B-Raf and VEGFR-2 with IC50 of 6 nM, 22 nM and 90 nM, respectively.	C1(=CC=C(C=C1C(F)(F)F)NC(NC2=CC=C(C=C2)OC3=CC=NC(=C3)C(NC)=O)=O)Cl.C4=CC(=CC=C4S(O)(=O)=O)C
14030	743	-12.2037	TRUE	TRUE	TRUE	ALEXIDINE HYDROCHLORIDE	antibacterial	Cl.Cl.CCCCC(CC)CNC(=N)NC(=N)NCCCCCCNC(=N)NC(=N)NCC(CC)CCCC
14030	883	-11.5616	TRUE	TRUE	TRUE	LASALOCID SODIUM	antibacterial	[Na+].CC[C@H](C1OC(CC)(C[C@@H]1C)C1CC[C@](O)(CC)[C@H](C)O1)C(=O)C(C)[C@@H](O)[C@H](C)CCC1=CC=C(C)C(O)=C1C([O-])=O
LOPAC	882	-11.5427	TRUE	TRUE	TRUE	Chloro-IB-MECA	A3 adenosine receptor agonist	CNC(=O)[C@H]1O[C@H]([C@H](O)[C@@H]1O)N1C=NC2=C1N=C(Cl)N=C2NCC1=CC=C(I)C=C1
L1900	763	-11.4094	TRUE	TRUE	TRUE	Scriptaid	Scriptaid is an inhibitor of HDAC. It shows a greater effect on acetylated H4 than H3.	C1=CC=C2C3=C1C(N(C(C(=CC=C2)3)=O)CCCCCC(NO)=O)=O
TM-L4	942	-11.3146	TRUE	TRUE	TRUE	Chlorhexidine hydrochloride	Chlorhexidine hydrochloride is a disinfectant and topical anti-infective agent used also as mouthwash to prevent oral plaque.	c1(NC(=N)NC(=N)NCCCCCCNC(=N)NC(=N)Nc2ccc(cc2)Cl)ccc(cc1)Cl.Cl.Cl
TM-L4	736	-11.3082	TRUE	TRUE	TRUE	Micafungin sodium	Micafungin Sodium is the sodium salt form of micafungin, a semi-synthetic echinocandin derived from a natural product of the fungus Coleophoma empetri with antifungal activity.	[Na+].CCCCCOc1ccc(cc1)-c1cc(no1)-c1ccc(cc1)C(=O)N[C@H]1C[C@@H](O)[C@@H](O)NC(=O)[C@@H]2[C@@H](O)[C@@H](C)CN2C(=O)[C@@H](NC(=O)[C@@H](NC(=O)[C@@H]2C[C@@H](O)CN2C(=O)[C@@H](NC1=O)[C@@H](C)O)[C@H](O)[C@@H](O)c1ccc(O)c(OS([O-])(=O)=O)c1)[C@H](O)CC(N)=O
TM-L4	898	-11.2615	TRUE	TRUE	TRUE	Aprepitant	Aprepitant is a Substance P/Neurokinin-1 Receptor Antagonist. The mechanism of action of aprepitant is as a Neurokinin 1 Antagonist, and Cytochrome P450 3A4 Inhibitor, and Cytochrome P450 2C9 Inducer, and Cytochrome P450 3A4 Inducer.	C[C@@H](O[C@H]1OCCN(Cc2nc(=O)[nH][nH]2)[C@H]1c1ccc(F)cc1)c1cc(cc(c1)C(F)(F)F)C(F)(F)F
pfizer	671	-10.7275	TRUE	TRUE	TRUE	PF-477736	Ser/Thr Kinase (Chk1 inhibitor)	CN1C=C(C=N1)C1=C2C=NNC(=O)C3=CC(NC(=O)[C@H](N)C4CCCCC4)=CC(N1)=C23
TM-L4	928	-10.1995	TRUE	TRUE	TRUE	Everolimus	Everolimus is a potent mTOR inhibitor that binds to FKBP-12. It is used alone or in combination with calcineurin inhibitors.	CO[C@@H]1C[C@H](C[C@@H](C)[C@@H]2CC(=O)[C@H](C)\C=C(C)\[C@@H](O)[C@@H](OC)C(=O)[C@H](C)C[C@H](C)\C=C\C=C\C=C(C)\[C@H](C[C@@H]3CC[C@@H](C)[C@@](O)(O3)C(=O)C(=O)N3CCCC[C@H]3C(=O)O2)OC)CC[C@H]1OCCO
L1200	808	-9.98456	TRUE	TRUE	TRUE	Ridaforolimus (Deforolimus, MK-8669)	Ridaforolimus (Deforolimus) is a selective mTOR inhibitor with IC50 of 0.2 nM; while not classified as a prodrug, mTOR inhibition and FKBP12 binding is similar to rapamycin.	[C@H]1(C[C@@H](CC[C@@H]1OP(C)(=O)C)C[C@H]([C@@H]2CC([C@@H](/C=C(/[C@H]([C@@H](OC)C([C@@H](C[C@@H](/C=C/C=C/C=C(/[C@H](C[C@]3(CC[C@H]([C@](C(C(N4[C@](C(O2)=O)(CCCC4)[H])=O)=O)(O3)O)C)[H])OC)C)C)C)=O)O)C)C)=O)C)OC
LOPAC	830	-9.94764	TRUE	TRUE	TRUE	SB-366791	Vanilloid receptor-1 (VR1) antagonist	COC1=CC=C(NC(=O)\C=C\C2=CC=C(Cl)C=C2)C=C1
LOPAC	706	-9.66804	TRUE	TRUE	TRUE	(±)-6-Chloro-PB hydrobromide	D1 dopamine receptor agonist	Br.OC1=CC2=C(CCNCC2C2=CC=CC=C2)C(Cl)=C1O
L1200	647	-9.57884	TRUE	TRUE	TRUE	NVP-AEW541	NVP-AEW541 is a potent inhibitor of IGF-1R with IC50 of 86 nM, 27-fold greater selectivity for IGF-1R than InsR.	C1=CC(=CC(=C1)OCC2=CC=CC=C2)C3=CN(C4=C3C(=NC=N4)N)[C@@H]5C[C@@H](C5)CN6CCC6
TM-L4	871	-9.45184	TRUE	TRUE	TRUE	Miconazole	Miconazole is an imidazole antifungal agent that is used topically and by intravenous infusion.	Clc1cc(Cl)c(COC(Cn2ccnc2)c2c(Cl)cc(Cl)cc2)cc1
14030	920	-9.42849	TRUE	TRUE	TRUE	CHLORHEXIDINE DIHYDROCHLORIDE	antibacterial (topical), disinfectant	Cl.Cl.ClC1=CC=C(NC(=N)NC(=N)NCCCCCCNC(=N)NC(=N)NC2=CC=C(Cl)C=C2)C=C1
L1200	877	-9.42343	TRUE	TRUE	TRUE	Everolimus (RAD001)	Everolimus (RAD001) is an mTOR inhibitor of FKBP12 with IC50 of 1.6-2.4 nM.	C(O)CO[C@H]1[C@@H](C[C@@H](CC1)C[C@@H]([C@H]2OC(=O)[C@@H]3CCCCN3C(=O)C([C@]4([C@@H](CC[C@H](O4)C[C@@H](/C(=C/C=C/C=C/[C@H](C[C@H](C([C@@H]([C@@H](O)/C(=C/[C@H](C(C2)=O)C)C)OC)=O)C)C)C)OC)C)O)=O)C)OC
L1200	844	-9.37773	TRUE	TRUE	TRUE	GNF-2	GNF-2 is a highly selective non-ATP competitive inhibitor of Bcr-Abl, shows no activity to Flt3-ITD, Tel-PDGFR, TPR-MET and Tel-JAK1 transformed tumor cells.	C1=CC(=CC(=C1)C(=O)N)C2=NC=NC(=C2)NC3=CC=C(C=C3)OC(F)(F)F
TM-L4	795	-9.30699	TRUE	TRUE	TRUE	Indacaterol maleate	Indacaterol Maleate is an ultra-long-acting β-adrenoceptor agonist.	[nH]1c(=O)ccc2c(ccc(c12)O)[C@H](CNC1Cc2c(C1)cc(c(c2)CC)CC)O.C(=O)(/C=C\C(=O)O)O
TM-L4	625	-9.24727	TRUE	TRUE	TRUE	Pimozide	Pimozide is a diphenylbutylpiperidine derivative and a dopamine antagonist with the antipsychotic property. Pimozide selectively inhibits type 2 dopaminergic receptors in the central nervous system (CNS), thereby decreasing dopamine neurotransmission and reducing the occurrence of the motor and vocal tics and delusions of parasitosis. In addition, this agent antagonizes alpha-adrenergic and 5-HT2…	Fc1ccc(cc1)C(CCCN1CCC(CC1)n1c2ccccc2[nH]c1=O)c1ccc(F)cc1
L1200	661	-8.87644	TRUE	TRUE	TRUE	Pelitinib (EKB-569)	Pelitinib (EKB-569) is a potent irreversible EGFR inhibitor with IC50 of 38.5 nM. Phase2.	C1(=C(C=C2C(=C1)N=CC(=C2NC3=CC(=C(C=C3)F)Cl)C#N)NC(/C=C/CN(C)C)=O)OCC
TM-L4	599	-8.63739	TRUE	TRUE	TRUE	Zinc pyrithione	Zinc pyrithione, an antibacterial and antifungal agent can disrupt membrane transport by blocking the proton pump.	[O-][n+]1ccccc1S[Zn]Sc1cccc[n+]1[O-]
L1200	835	-8.40885	TRUE	TRUE	TRUE	Rapamycin (Sirolimus)	Rapamycin (Sirolimus, AY-22989, WY-090217) is a specific mTOR inhibitor with IC50 of ~0.1 nM.	[C@@H]1([C@@H](C[C@@H](CC1)C[C@H]([C@@H]2CC([C@@H](/C=C(\C)[C@H]([C@@H](C([C@@H](C[C@@H](/C=C/C=C/C=C(/[C@H](C[C@@H]3CC[C@H]([C@](C(C(N4CCCC[C@@H](C(O2)=O)4)=O)=O)(O3)O)C)OC)C)C)C)=O)OC)O)C)=O)C)OC)O
TM-L4	867	-7.96355	TRUE	TRUE	TRUE	Indacaterol	Indacaterol (Onbrez; Arcapta) is a β2-Adrenergic Agonist. The mechanism of action of indacaterol is as an Adrenergic beta2-Agonist.	CCc1c(cc2CC(Cc2c1)NC[C@@H](c1c2ccc(=O)[nH]c2c(cc1)O)O)CC
TM-L4	791	-7.81885	TRUE	TRUE	TRUE	Nelfinavir Mesylate	Nelfinavir Mesylate is an effective HIV protease inhibitor (Ki: 2 nM).	Cc1c(cccc1O)C(=O)N[C@@H](CSc1ccccc1)[C@@H](CN1C[C@H]2CCCC[C@H]2C[C@H]1C(=O)NC(C)(C)C)O.CS(=O)(=O)O
14030	605	-7.67444	TRUE	TRUE	TRUE	GRAMICIDIN	antibacterial	CC(C)CC(NC(=O)C(C)NC(=O)CNC(=O)C(NC=O)C(C)C)C(=O)NC(C)C(=O)NC(C(C)C)C(=O)NC(C(C)C)C(=O)NC(C(C)C)C(=O)NC(CC1=CNC2=C1C=CC=C2)C(=O)NC(CC(C)C)C(=O)NC(CC1=CNC2=C1C=CC=C2)C(=O)NC(CC(C)C)C(=O)NC(CC1=CNC2=C1C=CC=C2)C(=O)NC(CC(C)C)C(=O)NC(CC1=CNC2=C1C=CC=C2)C(=O)NCCO
L1200	674	-7.44004	TRUE	TRUE	TRUE	Milciclib (PHA-848125)	PHA-848125 is a potent, ATP-competitive CDK inhibitor for CDK2 with IC50 of 45 nM. It is >3-fold more selective for CDK2 than CDK1, 2, 4, 5, and 7. Phase 2.	C12CC(C3=C(C(=NC(=NC=1)NC4=CC=C(C=C4)N5CCN(CC5)C)2)N(N=C3C(NC)=O)C)(C)C
TM-L4	882	-7.41186	TRUE	TRUE	TRUE	Simvastatin	Simvastatin is a HMG-CoA Reductase Inhibitor. The mechanism of action of simvastatin is as a Hydroxymethylglutaryl-CoA Reductase Inhibitor.	CCC(C)(C)C(=O)O[C@H]1C[C@@H](C)C=C2C=C[C@H](C)[C@H](CC[C@@H]3C[C@@H](O)CC(=O)O3)[C@@H]12
LOPAC	802	-7.37327	TRUE	TRUE	TRUE	SKF 95282 dimaleate	H2 Histamine receptor antagonist.	OC(=O)\C=C/C(O)=O.OC(=O)\C=C/C(O)=O.C(CNC1=NC2=C(S1)C=CC=C2)COC1=CC=CC(CN2CCCCC2)=C1
TM-L4	888	-7.36784	TRUE	TRUE	TRUE	Oxiconazole nitrate	Oxiconazole Nitrate is the nitrate salt form of oxiconazole, a broad spectrum imidazole derivative with antifungal activity. Although the exact mechanism of action has yet to be fully elucidated, oxiconazole, like other azole antifungals, most likely inhibits the cytochrome P450-dependent demethylation of lanosterol. This prevents the synthesis of ergosterol which is a crucial component of fungal…	[N+](=O)([O-])O.C(=N\OCc1c(cc(cc1)Cl)Cl)(/c1c(cc(cc1)Cl)Cl)\Cn1ccnc1
LOPAC	794	-7.10065	TRUE	TRUE	TRUE	NSC 95397	Selective, irreversible Cdc25 dual specificity phosphatase inhibitor.	OCCSC1=C(SCCO)C(=O)C2=CC=CC=C2C1=O
TM-L4	878	-6.99629	TRUE	TRUE	TRUE	Rifapentine	Rifapentine is a long-acting, cyclopentyl-substituted derivative of rifamycin used to treat mycobacterium infections.	CO[C@H]1\C=C\O[C@@]2(C)Oc3c(C2=O)c2c(O)c(\C=N\N4CCN(CC4)C4CCCC4)c(NC(=O)\C(C)=C/C=C/[C@H](C)[C@H](O)[C@@H](C)[C@@H](O)[C@@H](C)[C@H](OC(C)=O)[C@@H]1C)c(O)c2c(O)c3C
14030	795	-6.8942	TRUE	TRUE	TRUE	BENZETHONIUM CHLORIDE	antiinfective (topical)	[Cl-].CC(C)(C)CC(C)(C)C1=CC=C(OCCOCC[N+](C)(C)CC2=CC=CC=C2)C=C1
LOPAC	791	-6.78763	TRUE	TRUE	TRUE	R(-)-Propylnorapomorphine hydrochloride	Highly potent and selective D2 dopamine receptor agonist	Cl.CCCN1CCC2=CC=CC3=C2[C@H]1CC1=C3C(O)=C(O)C=C1
14030	721	-6.76855	TRUE	TRUE	TRUE	THONZONIUM BROMIDE	mucolytic, antibacterial, surface active agent	[Br-].CCCCCCCCCCCCCCCC[N+](C)(C)CCN(CC1=CC=C(OC)C=C1)C1=NC=CC=N1
L2300	845	-6.76792	TRUE	TRUE	TRUE	Gossypol	Gossypol is a polyphenolic aldehyde that permeates cells and acts as an inhibitor for several dehydrogenase enzymes.	C1(=C(C(=C(C2=C1C(=C(C(=C2)C)C3=C(C4=C(C=C3C)C(=C(C(=C4C([H])=O)O)O)C(C)C)O)O)C(C)C)O)O)C(=O)[H]
pfizer	827	-6.76516	TRUE	TRUE	TRUE	CP-471474	Metalloproteinase inhibitor	CC(C)(NS(=O)(=O)C1=CC=C(OC2=CC=C(F)C=C2)C=C1)C(=O)NO
L1200	680	-6.69758	TRUE	TRUE	TRUE	Sorafenib	Sorafenib is a multikinase inhibitor of Raf-1, B-Raf and VEGFR-2 with IC50 of 6 nM, 22 nM and 90 nM, respectively.	C1(C(F)(F)F)C(=CC=C(NC(NC2C=CC(OC3C=C(C(=O)NC)N=CC=3)=CC=2)=O)C=1)Cl
14030	527	-6.55558	TRUE	TRUE	TRUE	MUNDULONE	Natural product previously implicated as GPCR inhibitor	COC1=C(C=CC2=C1C=CC(C)(C)O2)C1=COC2=C(C=C3CC(O)C(C)(C)OC3=C2)C1=O
14030	817	-6.48194	TRUE	TRUE	TRUE	MILTEFOSINE [5mM]	antineoplastic	CCCCCCCCCCCCCCCCOP([O-])(=O)OCC[N+](C)(C)C
LOPAC	678	-6.24283	TRUE	TRUE	TRUE	IPA-3	allosteric inhibitor of Pak1, binds to autoinhibitory domain of Pak1 (p21 activated kinase)	OC1=CC=C2C=CC=CC2=C1SSC1=C2C=CC=CC2=CC=C1O
14030	973	-6.22772	TRUE	TRUE	TRUE	CHLORHEXIDINE DIHYDROCHLORIDE	antibacterial (topical), disinfectant	Cl.Cl.ClC1=CC=C(NC(=N)NC(=N)NCCCCCCNC(=N)NC(=N)NC2=CC=C(Cl)C=C2)C=C1
TM-L4	902	-6.15375	TRUE	TRUE	TRUE	Vorapaxar	Vorapaxar (SCH 530348) is an effective and orally active thrombin receptor (PAR-1) antagonist (Ki: 8.1 nM).	CCOC(=O)N[C@@H]1CC[C@@H]2[C@H](C[C@@H]3[C@@H]([C@@H](C)OC3=O)[C@H]2\C=C\c2ccc(cn2)-c2cccc(F)c2)C1
TM-L4	859	-6.12917	TRUE	TRUE	TRUE	Rapamycin	Rapamycin, a macrolide compound obtained from Streptomyces hygroscopicus, is a potent and specific mTOR inhibitor (IC50: 0.1 nM in HEK293 cells).	CO[C@@H]1C[C@H](C[C@@H](C)[C@@H]2CC(=O)[C@H](C)\C=C(C)\[C@@H](O)[C@@H](OC)C(=O)[C@H](C)C[C@H](C)\C=C\C=C\C=C(C)\[C@H](C[C@@H]3CC[C@@H](C)[C@@](O)(O3)C(=O)C(=O)N3CCCC[C@H]3C(=O)O2)OC)CC[C@H]1O
L1200	763	-6.09111	TRUE	TRUE	TRUE	Pazopanib HCl (GW786034 HCl)	Pazopanib (GW786034) is a novel multi-target inhibitor of VEGFR1, VEGFR2, VEGFR3, PDGFR, FGFR, c-Kit and c-Fms with IC50 of 10 nM, 30 nM, 47 nM, 84 nM, 74 nM, 140 nM and 146 nM, respectively.	C1(=C(C(=CC(=C1)NC2=NC=CC(=N2)N(C3C=CC4C(C=3)=NN(C=4C)C)C)S(=O)(N)=O)C).Cl
L1200	851	-6.0908	TRUE	TRUE	TRUE	BIRB 796 (Doramapimod)	BIRB 796 (Doramapimod) is a highly selective p38α MAPK inhibitor with Kd of 0.1 nM, 330-fold greater selectivity versus JNK2, weak inhibition for c-RAF, Fyn and Lck, insignificant inhibition of ERK-1, SYK, IKK2, ZAP-70, EGFR, HER2, PKA, PKC, PKCα/β/γ.	C1=C(C2=C(C(=C1)OCCN3CCOCC3)C=CC=C2)NC(NC4=CC(=NN4C5=CC=C(C=C5)C)C(C)(C)C)=O
LOPAC	762	-6.03969	TRUE	TRUE	TRUE	Nelfinavir mesylate hydrate	Nelfinavir is a HIV protease inhibitor; antiretroviral; and anti-tumor agent	CS(O)(=O)=O.CC1=C(C=CC=C1O)C(=O)N[C@@H](CSC1=CC=CC=C1)[C@H](O)CN1C[C@H]2CCCC[C@H]2C[C@H]1C(=O)NC(C)(C)C
LOPAC	766	-6.0061	TRUE	TRUE	TRUE	Bropirimine	Bropirimine is an immunostimulating agent	NC1=NC(=O)C(Br)=C(N1)C1=CC=CC=C1
L2300	765	-5.92269	TRUE	TRUE	TRUE	BML-277	CHK kinase inhibitor	C1=C(C=CC2=C1N=C(N2)C3=CC=C(C=C3)OC4=CC=C(C=C4)Cl)C(N)=O
LOPAC	710	-5.81416	TRUE	TRUE	TRUE	Tranilast	Inhibits LTC4 and PGE2 formation but does not inhibit cyclooxygenase or lipoxygenase activity; anti-asthma drug	COC1=C(OC)C=C(\C=C\C(=O)NC2=CC=CC=C2C(O)=O)C=C1
TM-L4	706	-5.74291	TRUE	TRUE	TRUE	Moxidectin	Moxidectin is an anthelmintic drug which kills parasitic worms; macrocyclic lactone of ivermectin class	CO\N=C1\C[C@]2(C[C@@H]3C[C@@H](C\C=C(C)\C[C@@H](C)\C=C\C=C4/CO[C@H]5[C@H](O)C(C)=C[C@@H](C(=O)O3)[C@]45O)O2)O[C@@H]([C@H]1C)C(\C)=C\C(C)C
LOPAC	706	-5.72218	TRUE	TRUE	TRUE	Phosphoramidon disodium	Inhibitor of mammalian enkephalinase and some metallo-endopeptidases; potent inhibitor of thermolysin and other bacterial metallo-endopeptidases	[Na+].[Na+].CC(C)CC(NP([O-])(=O)O[C@@H]1O[C@@H](C)[C@H](O)[C@@H](O)[C@H]1O)C(=O)NC(CC1=CNC2=C1C=CC=C2)C([O-])=O
LOPAC	817	-5.58303	TRUE	TRUE	TRUE	(±)-Epinephrine hydrochloride	Adrenoceptor agonist	Cl.CNCC(O)C1=CC(O)=C(O)C=C1
LOPAC	686	-5.52828	TRUE	TRUE	TRUE	MNS	Src and Syk kinase inhibitor; prevents phosphorylation and cytoskeletal association of GPIIb/IIIa and talin.	[O-][N+](=O)\C=C\C1=CC2=C(OCO2)C=C1
TM-L4	823	-5.48088	TRUE	TRUE	TRUE	Avanafil	Avanafil is a selective inhibitor of phosphodiesterase type 5 (PDE5) and is used as therapy of erectile dysfunction.	c1(nc(c(cn1)C(=O)NCc1ncccn1)NCc1cc(c(cc1)OC)Cl)N1[C@@H](CCC1)CO
TM-L4	773	-5.46323	TRUE	TRUE	TRUE	Norgestimate	Norgestimate is an acetylated progestinused in combination with ethinyl estradiol as an oral contraceptive.	C#C[C@]1(OC(C)=O)CC[C@H]2[C@@H]3CCC4=C/C(=N/O)CC[C@@H]4[C@H]3CC[C@@]21CC
14030	802	-5.4448	TRUE	TRUE	TRUE	ERYTHROMYCIN ESTOLATE	antibacterial	CCCCCCCCCCCCOS(O)(=O)=O.CC[C@H]1OC(=O)[C@H](C)[C@@H](O[C@H]2C[C@@](C)(OC)[C@@H](O)[C@H](C)O2)[C@H](C)[C@@H](O[C@@H]2O[C@H](C)C[C@@H]([C@H]2OC(=O)CC)N(C)C)[C@](C)(O)C[C@@H](C)C(=O)[C@H](C)[C@@H](O)[C@]1(C)O
TM-L4	819	-5.39893	TRUE	TRUE	TRUE	Sertaconazole nitrate	Sertaconazole nitrate, a topical broad-spectrum antifungal, is developed to supply an additional agent for the treatment of superficial cutaneous and mucosal infections.	c1cc2c(c(c1)Cl)scc2COC(Cn1ccnc1)c1c(cc(cc1)Cl)Cl.[N+](=O)(O)[O-]
14030	827	-5.38204	TRUE	TRUE	TRUE	GOSSYPOL-ACETIC ACID COMPLEX	male contraceptive, dehydrogenase inhibitor, antimalarial	CC(O)=O.CC(C)C1=C2C=C(C)C(=C(O)C2=C(C=O)C(O)=C1O)C1=C(O)C2=C(C=O)C(O)=C(O)C(C(C)C)=C2C=C1C
L2300	612	-5.34032	TRUE	TRUE	TRUE	Sorafenib (Nexavar)	Sorafenib Tosylate (Bay 43-9006, Nexavar) is a multikinase inhibitor of Raf-1, B-Raf and VEGFR-2 with IC50 of 6 nM, 22 nM and 90 nM, respectively.	C1(=CC=C(C=C1C(F)(F)F)NC(NC2=CC=C(C=C2)OC3=CC=NC(=C3)C(NC)=O)=O)Cl.C4=CC(=CC=C4S(O)(=O)=O)C
LOPAC	829	-5.30958	TRUE	TRUE	TRUE	Trequinsin hydrochloride	Phosphodiesterase III (PDE III) inhibitor	Cl.COC1=C(OC)C=C2C(CCN3C(=O)N(C)\C(C=C23)=N\C2=C(C)C=C(C)C=C2C)=C1
14030	832	-5.30726	TRUE	TRUE	TRUE	ISOPOMIFERIN	antioxidant	CC1(C)CCC2=C3OC(C)(C)C=CC3=C3OC=C(C(=O)C3=C2O1)C1=CC=C(O)C(O)=C1
14030	826	-5.26888	TRUE	TRUE	TRUE	DESLORATIDINE	H1-antihistamine	ClC1=CC=C2C(CCC3=C(N=CC=C3)C2=C2CCNCC2)=C1
pfizer	679	-5.26716	TRUE	TRUE	TRUE	PD-407824	Ser/Thr Kinase (Wee1/ChK1 inhibitor)	OC1=CC2=C(NC3=C2C2=C(C(=O)NC2=O)C(=C3)C2=CC=CC=C2)C=C1
TM-L4	861	-5.26642	TRUE	TRUE	TRUE	Vorapaxar sulfate	Vorapaxar sulfate is a potent and orally active thrombin receptor (PAR-1) antagonist.	S(=O)(=O)(O)O.Fc1cc(c2cnc(/C=C/[C@@H]3[C@H]4[C@@H](C[C@H]5[C@H]3CC[C@@H](NC(=O)OCC)C5)C(=O)O[C@@H]4C)cc2)ccc1
L2300	920	-5.21089	TRUE	TRUE	TRUE	TW-37	TW-37 is a novel nonpeptide inhibitor to recombinant Bcl-2, Bcl-xL and Mcl-1; implicated in fatty acid transport	C1=CC=CC(=C1C(C)(C)C)S(C2=CC=C(C=C2)NC(C3=C(C(=C(C(=C3)CC4=CC=CC=C4C(C)C)O)O)O)=O)(=O)=O
LOPAC	687	-5.1714	TRUE	TRUE	TRUE	PD-407824	PD-407824 is a Wee1/Chk1 inhibitor	OC1=CC=C2NC3=C(C2=C1)C1=C(C(=O)NC1=O)C(=C3)C1=CC=CC=C1
LOPAC	727	-5.12522	TRUE	TRUE	TRUE	Tamoxifen citrate	Anti-estrogen; relatively selective protein kinase C inhibitor	OC(=O)CC(O)(CC(O)=O)C(O)=O.CC\C(=C(/C1=CC=CC=C1)C1=CC=C(OCCN(C)C)C=C1)C1=CC=CC=C1
14030	730	-5.07765	TRUE	TRUE	TRUE	APOMORPHINE HYDROCHLORIDE	emetic, antiparkinsonian, erextile dysfunction therapy	Cl.CN1CCC2=CC=CC3=C2C1CC1=CC=C(O)C(O)=C31
TM-L4	844	-4.98044	TRUE	TRUE	TRUE	Isavuconazonium sulfate	Hydrolyzed by plasma esterases to yield the active moiety isavuconazole. Isavuconazole binds to and inhibits the fungal cytochrome P450 family enzyme lanosterol 14-alpha-demethylase (CYP51), which catalyzes the demethylation of lanosterol to yield ergosterol, an important component of the fungal cell membrane. Isavuconazonium Sulfate is a prodrug of the triazole antifungal agent isavuconazole, wi…	n1(nc[n+](c1)C(C)OC(=O)N(c1c(cccn1)COC(=O)CNC)C)C[C@]([C@@H](C)c1scc(n1)c1ccc(cc1)C#N)(O)c1c(ccc(c1)F)F.S(=O)(=O)(O)[O-]
L2300	515	-4.9307	TRUE	TRUE	TRUE	SNS-314	SNS-314 Mesylate is a potent and selective inhibitor of Aurora A, Aurora B and Aurora C with IC50 of 9 nM, 31 nM, and 3.4 nM, respectively.	C12(=C(N=CN=C1NCCC3SC(=NC=3)NC(NC4=CC(=CC=C4)Cl)=O)C=CS2).CS(=O)(=O)O
L1200	786	-4.90512	TRUE	TRUE	TRUE	BYL719	BYL719 is a potent and selective PI3Kα inhibitor with IC50 of 5 nM, and minimal effect on PI3Kβ/γ/δ. Phase 1/2.	N1([C@@H](CCC1)C(=O)N)C(=O)NC2SC(=C(N=2)C)C3=CC(=NC=C3)C(C(F)(F)F)(C)C
L1200	848	-4.90389	TRUE	TRUE	TRUE	Temsirolimus (CCI-779, NSC 683864)	Temsirolimus (CCI-779) is a specific mTOR inhibitor with IC50 of 1.76 μM.	[C@H]1(C[C@@H](CC[C@@H]1OC(C(CO)(CO)C)=O)C[C@H]([C@@H]2CC([C@@H](/C=C(/[C@H]([C@@H](OC)C([C@@H](C[C@@H](/C=C/C=C/C=C(/[C@H](C[C@]3(CC[C@H]([C@](C(C(N4[C@](C(O2)=O)(CCCC4)[H])=O)=O)(O3)O)C)[H])OC)C)C)C)=O)O)C)C)=O)C)OC
LOPAC	785	-4.88181	TRUE	TRUE	TRUE	Ammonium pyrrolidinedithiocarbamate	Prevents induction of nitric oxide synthase (NOS) by inhibiting translation of NOS mRNA	[NH4+].[S-]C(=S)N1CCCC1
L1200	762	-4.87288	TRUE	TRUE	TRUE	SKI II	SKI II is a highly selective and non ATP-competitive S1P receptor inhibitor with IC50 of 0.5 μM, while exhibits no inhibitory on other kinases including PI3K, PKCα and ERK2.	C1(C2=CC=C(C=C2)Cl)N=C(NC3=CC=C(C=C3)O)SC=1
pfizer	725	-4.86351	TRUE	TRUE	TRUE	PF-573228	Tyrosine Kinase inhibitor with selectivity for FAK	CS(=O)(=O)C1=CC=CC(CNC2=NC(NC3=CC4=C(NC(=O)CC4)C=C3)=NC=C2C(F)(F)F)=C1
L1200	866	-4.80804	TRUE	TRUE	TRUE	WAY-600	WAY-600 is a potent, ATP-competitive and selective inhibitor of mTOR with IC50 of 9 nM; blocks mTORC1/P-S6K(T389) and mTORC2/P-AKT(S473) but not P-AKT(T308); selective for mTOR than PI3Kα (>100-fold) and PI3Kγ (>500-fold).	C12=C(C=CC(=C1)C3=NC4=C(C(=N3)N5CCOCC5)C=NN4C6CCN(CC6)CC7=CC=CN=C7)NC=C2
14030	695	-4.80429	TRUE	TRUE	TRUE	METITEPINE MESYLATE	5HT1&2 receptor antagonist	CS(O)(=O)=O.CSC1=CC2=C(SC3=CC=CC=C3CC2N2CCN(C)CC2)C=C1
14030	894	-4.7669	TRUE	TRUE	TRUE	CHLORMIDAZOLE	Imidazole antifungal	CC1=NC2=CC=CC=C2N1CC1=CC=C(Cl)C=C1
LOPAC	856	-4.68691	TRUE	TRUE	TRUE	Dihydroergotamine methanesulfonate	Ergot alkaloid; vasoconstrictor; competitive serotonin receptor antagonist; partial agonist at alpha adrenoceptors and D2 dopamine receptors	CS(O)(=O)=O.CN1C[C@@H](C[C@H]2[C@H]1CC1=CNC3=CC=CC2=C13)C(=O)N[C@]1(C)O[C@@]2(O)[C@@H]3CCCN3C(=O)[C@H](CC3=CC=CC=C3)N2C1=O
14030	955	-4.65444	TRUE	TRUE	TRUE	DIMERCAPROL	chelating agent (As, Au, Hg antidote)	OCC(S)CS
L1200	841	-4.65304	TRUE	TRUE	TRUE	CGK 733	CGK 733 is a potent and selective inhibitor of ATM/ATR with IC50 of ~200 nM.	C1=C(C(=CC(=C1)NC(NC(C(Cl)(Cl)Cl)NC(C(C2=CC=CC=C2)C3=CC=CC=C3)=O)=S)[N+](=O)[O-])F
TM-L4	816	-4.63068	TRUE	TRUE	TRUE	Pimecrolimus	Pimecrolimus, a calcineurin inhibitor immunosuppressant, binds to the receptor macrophilin-12 (FKBP-12) forming a complex that blocks the calcium-dependent signal transduction cascade mediated by calcineurin; mTOR signaling inhibitor	CC[C@@H]1\C=C(C)\C[C@H](C)C[C@H](OC)[C@H]2O[C@](O)([C@H](C)C[C@@H]2OC)C(=O)C(=O)N2CCCC[C@H]2C(=O)O[C@@H]([C@H](C)[C@@H](O)CC1=O)C(\C)=C\[C@@H]1CC[C@H](Cl)[C@@H](C1)OC
L1900	805	-4.6128	TRUE	TRUE	TRUE	EPZ005687	EPZ005687 is a potent and selective inhibitor of EZH2 with Ki of 24 nM, 50-fold selectivity against EZH1 and 500-fold selectivity against 15 other protein methyltransferases.	C12=C(C(=CC(=C1)C3=CC=C(C=C3)CN4CCOCC4)C(=O)NCC5C(NC(=CC=5C)C)=O)C=NN2C6CCCC6
LOPAC	663	-4.60468	TRUE	TRUE	TRUE	Fluoxetine hydrochloride	Selective serotonin reuptake inhibitor	Cl.CNCCC(OC1=CC=C(C=C1)C(F)(F)F)C1=CC=CC=C1
14030	857	-4.57898	TRUE	TRUE	TRUE	PHENETHYL CAFFEATE (CAPE)	antineoplastic, antiinflammatory, immunomodulator, NFkB blocker	OC1=C(O)C=C(\C=C\C(=O)OCCC2=CC=CC=C2)C=C1
TM-L4	824	-4.55137	TRUE	TRUE	TRUE	Elvitegravir	Elvitegravir is a Human Immunodeficiency Virus Integrase Strand Transfer Inhibitor. The mechanism of action of elvitegravir is as an HIV Integrase Inhibitor, and Cytochrome P450 2C9 Inducer.	c1c(c(c(cc1)Cc1cc2c(=O)c(C(=O)O)cn(c2cc1OC)[C@@H](C(C)C)CO)F)Cl
LOPAC	727	-4.51397	TRUE	TRUE	TRUE	Suramin sodium salt	P2X and P2Y receptor antagonist; antiparasitic; anti-tumor agent	[Na+].[Na+].[Na+].[Na+].[Na+].[Na+].CC1=C(NC(=O)C2=CC=CC(NC(=O)NC3=CC(=CC=C3)C(=O)NC3=C(C)C=CC(=C3)C(=O)NC3=CC=C(C4=C3C(=CC(=C4)S([O-])(=O)=O)S([O-])(=O)=O)S([O-])(=O)=O)=C2)C=C(C=C1)C(=O)NC1=CC=C(C2=C1C(=CC(=C2)S([O-])(=O)=O)S([O-])(=O)=O)S([O-])(=O)=O
14030	453	-4.49339	TRUE	TRUE	TRUE	PRIMAQUINE PHOSPHATE	antimalarial	OP(O)(O)=O.OP(O)(O)=O.COC1=CC2=CC=CN=C2C(NC(C)CCCN)=C1
LOPAC	705	-4.48483	TRUE	TRUE	TRUE	Primidone	Anticonvulsant	CCC1(C(=O)NCNC1=O)C1=CC=CC=C1
LOPAC	818	-4.41443	TRUE	TRUE	TRUE	CP-100356 monohydrochloride	CP-100356 is a specific inhibitor of MDR1 (P-Gp), the protypical ABC transporter. CP-100356 also inhibits prazosin transport in human breast cancer resistance protein (BCRP)-transfected MDCKII cells	Cl.COC1=CC2=C(CN(CC2)C2=NC(NCCC3=CC(OC)=C(OC)C=C3)=NC3=CC(OC)=C(OC)C=C23)C=C1OC
LOPAC	822	-4.41004	TRUE	TRUE	TRUE	Fenoldopam bromide	Peripheral D1 dopamine receptor agonist	Br.OC1=CC=C(C=C1)C1CNCCC2=C(Cl)C(O)=C(O)C=C12
LOPAC	830	-4.37076	TRUE	TRUE	TRUE	Tulobuterol hydrochloride	beta-Adrenoceptor agonist related to structurally to terbutaline; bronchodilator	Cl.CC(C)(C)NCC(O)C1=C(Cl)C=CC=C1
L2300	835	-4.31752	TRUE	TRUE	TRUE	Lomeguatrib	Highly potent inactivator of O(6)-methylguanine-DNA methyltransferase (MGMT)	N1C2=C(NC=N2)C(=NC=1N)OCC3=CC(Br)=CS3
TM-L4	831	-4.30365	TRUE	TRUE	TRUE	Canagliflozin	Canagliflozin, a sodium-glucose transporter 2( SGLT2) and P-Glycoprotein inhibitor, is used in type 2 diabetes.	c1(c2ccc(F)cc2)sc(cc1)Cc1c(C)ccc(c1)[C@H]1[C@H](O)[C@@H](O)[C@H](O)[C@@H](CO)O1
LOPAC	855	-4.27592	TRUE	TRUE	TRUE	Gossypol	Natural product from cotton seeds with a variety of cell biological activities. Proapoptotic, antimalarial, PKC inhibition.	CC(C)C1=C(O)C(O)=C(C=O)C2=C(O)C(=C(C)C=C12)C1=C(O)C2=C(C=O)C(O)=C(O)C(C(C)C)=C2C=C1C
L1200	749	-4.26003	TRUE	TRUE	TRUE	Erlotinib HCl (OSI-744)	Erlotinib HCl (OSI-744) is an EGFR inhibitor with IC50 of 2 nM, >1000-fold more sensitive for EGFR than human c-Src or v-Abl. Phase 3.	C1(=CC=CC(=C1)C#C)NC2(=NC=NC3=C2C=C(C(=C3)OCCOC)OCCOC)C.Cl
LOPAC	886	-4.22603	TRUE	TRUE	TRUE	Nordihydroguaiaretic acid from Larrea divaricata (creosote bush)	Lipoxygenase inhibitor	C[C@H](CC1=CC(O)=C(O)C=C1)[C@@H](C)CC1=CC=C(O)C(O)=C1
L1200	789	-4.20335	TRUE	TRUE	TRUE	PF-562271	PF-562271 is a potent, ATP-competitive, reversible inhibitor of FAK with IC50 of 1.5 nM, ~10-fold less potent for Pyk2 than FAK and >100-fold selectivity against other protein kinases, except for some CDKs.	C1=NC(=C(C=C1)CNC2=C(C=NC(=N2)NC3=CC=C4C(=C3)CC(N4)=O)C(F)(F)F)N(C)S(=O)(=O)C
L1200	954	-4.16584	TRUE	TRUE	TRUE	H 89 2HCl	H 89 2HCl is a potent PKA inhibitor with Ki of 48 nM, 10-fold selective for PKA than PKG, greater than 500-fold selectivity than PKC, MLCK, calmodulin kinase II and casein kinase I/II.	C1(=CC=C(C2=C1C=NC=C2)S(NCCNC/C=C/C3=CC=C(C=C3)Br)(=O)=O).Cl.Cl
14030	795	-4.15785	TRUE	TRUE	TRUE	CLOMIPRAMINE HYDROCHLORIDE	antidepressant	Cl.CN(C)CCCN1C2=CC=CC=C2CCC2=C1C=C(Cl)C=C2
L2300	836	-4.14553	TRUE	TRUE	TRUE	BML-266	Structurally novel SIRT2 inhibitor	C12=C(C(=CC=C1NCCC3=CC=C(C=C3)O)NCCC4=CC=C(C=C4)O)C(C5C(C2=O)=CC=CC=5)=O
LOPAC	725	-4.12437	TRUE	TRUE	TRUE	D-609 potassium	Xanthogenate derivative with in vitro anti-tumor and anti-HIV-1 activity; inhibits phospholipase D and phosphatidylcholine phospholipase C (PIPLC)	[K+].[S-]C(=S)OC1CC2CC1C1CCCC21
LOPAC	731	-4.10249	TRUE	TRUE	TRUE	BIA 2-093	Blocker of voltage-gated sodium channels; significantly blocks excitatory amino acid (glutamate and aspartate) release.	CC(=O)O[C@H]1CC2=C(C=CC=C2)N(C(N)=O)C2=C1C=CC=C2
14030	848	-4.10238	TRUE	TRUE	TRUE	MIFEPRISTONE	progesterone antagonist, abortion inducer	CC#C[C@]1(O)CCC2C3CCC4=CC(=O)CCC4=C3[C@H](C[C@]12C)C1=CC=C(C=C1)N(C)C
14030	772	-4.06565	TRUE	TRUE	TRUE	TYLOXAPOL	polymeric nonionic detergent	ERR
TM-L4	712	-4.0569	TRUE	TRUE	TRUE	Carvedilol	Carvedilol Phosphate is the phosphate salt form of carvedilol, a racemic mixture and adrenergic blocking agent with antihypertensive activity and devoid of intrinsic sympathomimetic activity. The S enantiomer of carvedilol nonselectively binds to and blocks beta-adrenergic receptors, thereby exerting negative inotropic and chronotropic effects, and leading to a reduction in cardiac output. In add…	COc1ccccc1OCCNCC(O)COc1cccc2c1c1ccccc1[nH]2
L2300	765	-4.05594	TRUE	TRUE	TRUE	CAY10581	Potent indoleamine 2,3-dioxygenase (IDO) inhibitor	C1=CC=C2C(=C1)C(C3=C(C2=O)[C@@H]([C@@H](C(O3)(C)C)O)NCC4=CC=CC=C4)=O
14030	843	-3.9116	TRUE	TRUE	TRUE	ADRENALONE HYDROCHLORIDE	adrenergic (opthalmic)	Cl.CNCC(=O)C1=CC(O)=C(O)C=C1
L1900	706	-3.89894	TRUE	TRUE	TRUE	Tofacitinib (CP-690550) Citrate	Tofacitinib citrate (CP-690550 citrate) is a novel inhibitor of JAK3 with IC50 of 1 nM, 20- to 100-fold less potent against JAK2 and JAK1.	N1(=CN=C2C(=C1N(C)[C@H]3CN(CC[C@@H]3C)C(=O)CC#N)C=CN2).C(C(C(O)=O)(CC(=O)O)O)C(O)=O
14030	850	-3.85791	TRUE	TRUE	TRUE	GOSSYPOL	antispermatogenic, antineoplastic, antiHIV	CC(C)C1=C2C=C(C)C(=C(O)C2=C(C=O)C(O)=C1O)C1=C(O)C2=C(C=O)C(O)=C(O)C(C(C)C)=C2C=C1C
LOPAC	726	-3.8372	TRUE	TRUE	TRUE	3-Tropanylindole-3-carboxylate methiodide	Potent, water soluble 5-HT3 serotonin receptor antagonist	[I-].C[N+]1(C)C2CCC1CC(C2)OC(=O)C1=CNC2=C1C=CC=C2
14030	804	-3.7946	TRUE	TRUE	TRUE	EPIESTRIOL	estrogen	CC12CCC3C(CCC4=CC(O)=CC=C34)C1C[C@H](O)[C@@H]2O
14030	763	-3.7884	TRUE	TRUE	TRUE	DIPERODON HYDROCHLORIDE	analgesic, anesthetic	Cl.O=C(NC1=CC=CC=C1)OCC(CN1CCCCC1)OC(=O)NC1=CC=CC=C1
14030	753	-3.74343	TRUE	TRUE	TRUE	OXEDRINE	anti-obesity	CNCC(O)C1=CC=C(O)C=C1
pfizer	688	-3.71527	TRUE	TRUE	TRUE	PF-431396	Tyrosine Kinase	O.CN(C1=C(CNC2=NC(NC3=CC4=C(NC(=O)C4)C=C3)=NC=C2C(F)(F)F)C=CC=C1)S(C)(=O)=O
TM-L4	699	-3.67109	TRUE	TRUE	TRUE	Cabozantinib hydrochloride (849217-68-1(free base))	Cabozantinib (XL184) is a potent pan-tyrosine kinases inhibitor that inhibits VEGFR2, c-Met, Kit, Axl, and Flt4 (IC50s: 0.035, 1.3, 4.6, 7 and 6 nM).	Cl.COc1cc2nccc(Oc3ccc(NC(=O)C4(CC4)C(=O)Nc4ccc(F)cc4)cc3)c2cc1OC
LOPAC	803	-3.65336	TRUE	TRUE	TRUE	(-)-Epinephrine bitartrate	Endogenous hormone and neurotransmitter	OC(C(O)C(O)=O)C(O)=O.CNC[C@H](O)C1=CC=C(O)C(O)=C1
TM-L4	688	-3.64405	TRUE	TRUE	TRUE	Regorafenib	Regorafenib (BAY 73-4506) is a multi-targeted receptor tyrosine kinase inhibitor (IC50s: 1.5/2.5/4.2/7/13/22 nM for RET/C-RAF/VEGFR2/c-Kit/VEGFR1/PDGFRβ).	CNC(=O)c1cc(Oc2ccc(NC(=O)Nc3ccc(Cl)c(c3)C(F)(F)F)c(F)c2)ccn1
TM-L4	737	-3.59059	TRUE	TRUE	TRUE	Budesonide	Budesonide, an anti-inflammatory corticosteroid, has shown the effective glucocorticoid activitie and few mineralocorticoid activities. According to reports, Budesonide has extensively inhibitory effects against multiple cells types and mediators referred to allergic and nonallergic-mediated inflammatory. What's more, the anti-inflammatory action of budesonide has been revealed to contribute to t…	CCCC1O[C@@H]2C[C@H]3[C@@H]4CCC5=CC(=O)C=C[C@]5(C)[C@H]4[C@@H](O)C[C@]3(C)[C@@]2(O1)C(=O)CO
TM-L4	687	-3.55949	TRUE	TRUE	TRUE	Ziprasidone hydrochloride	Ziprasidone (hydrochloride) is a united 5-HT (serotonin) and dopamine receptor antagonist which shows potent effects of antipsychotic activity.	Clc1c(cc2CC(=O)Nc2c1)CCN1CCN(c2nsc3ccccc23)CC1.Cl
L1900	756	-3.55283	TRUE	TRUE	TRUE	EPZ004777 HCl	EPZ004777 HCl is the hydrochloride salt of EPZ004777, which is a potent, selective DOT1L inhibitor with IC50 of 0.4 nM.	C(CNC(NC1=CC=C(C=C1)C(C)(C)C)=O)CN(C[C@@H]2[C@H]([C@H]([C@@H](O2)N3C4=C(C=C3)C(=NC=N4)N)O)O)C(C)C.Cl
LOPAC	821	-3.54211	TRUE	TRUE	TRUE	6,7-ADTN hydrobromide	Dopamine receptor agonist	Br.NC1CCC2=C(C1)C=C(O)C(O)=C2
L1200	678	-3.5313	TRUE	TRUE	TRUE	PF-00562271	PF-00562271 is the benzenesulfonate salt of PF-562271, which is a potent, ATP-competitive, reversible inhibitor of FAK with IC50 of 1.5 nM, ~10-fold less potent for Pyk2 than FAK and >100-fold selectivity against other protein kinases, except for some CDKs. Phase 1.	C1(=NC(=C(C=C1)CNC2=C(C=NC(=N2)NC3=CC=C4C(=C3)CC(N4)=O)C(F)(F)F)N(C)S(=O)(C)=O).C5=CC=CC(=C5)S(O)(=O)=O
LOPAC	780	-3.45014	TRUE	TRUE	TRUE	Cilnidipine	Slow-acting Ca2+ channel blocker; antihypertensive; vasodilator. Does not inhibit PKC.	COCCOC(=O)C1=C(C)NC(C)=C(C1C1=CC(=CC=C1)N(=O)=O)C(=O)OC\C=C\C1=CC=CC=C1
LOPAC	748	-3.43479	TRUE	TRUE	TRUE	L-Beta-threo-benzyl-aspartate	Preferential EAAT3 excitatory amino acid transporter inhibitor.	N[C@@H]([C@H](CC1=CC=CC=C1)C(O)=O)C(O)=O
14030	654	-3.38634	TRUE	TRUE	TRUE	LAPACHOL METHYL ETHER	Natural phenolic compound and derivative of vitamin K; antifungal	COC1=C(CC=C(C)C)C(=O)C2=CC=CC=C2C1=O
14030	827	-3.33722	TRUE	TRUE	TRUE	COLFORSIN	adenylate cyclase activator, antiglaucoma, hypotensive, vasodilator	CC(=O)O[C@H]1[C@@H](O)C2C(C)(C)CC[C@H](O)[C@]2(C)[C@@]2(O)C(=O)C[C@@](C)(O[C@]12C)C=C
LOPAC	849	-3.30435	TRUE	TRUE	TRUE	Albuterol hemisulfate	beta Adrenoceptor agonist	OS(O)(=O)=O.CC(C)(C)NCC(O)C1=CC=C(O)C(CO)=C1.CC(C)(C)NCC(O)C1=CC=C(O)C(CO)=C1
TM-L4	850	-3.29082	TRUE	TRUE	TRUE	Dipivefrin hydrochloride	Dipivefrin that is available as an ophthalmic solution is a prodrug of adrenaline, which is used to treat glaucoma.	Cl.CNCC(O)c1cc(OC(=O)C(C)(C)C)c(OC(=O)C(C)(C)C)cc1
TM-L4	836	-3.2416	TRUE	TRUE	TRUE	Econazole nitrate	Econazole nitrate (Spectazole) is an imidazole class antifungal medicine.	O[N+](=O)[O-].Clc1ccc(COC(Cn2ccnc2)c2c(Cl)cc(Cl)cc2)cc1
14030	1000	-3.23924	TRUE	TRUE	TRUE	ETHINYL ESTRADIOL	estrogen, plus progestogen as oral contraceptive	C[C@]12CCC3C(CCC4=C3C=CC(O)=C4)C1CC[C@@]2(O)C#C
TM-L4	621	-3.21114	TRUE	TRUE	TRUE	Lopinavir	Lopinavir is a peptidomimetic HIV protease inhibitor that retains activity against HIV protease with the Val 82 mutation. Lopinavir is less affected by binding to serum proteins than the structurally-related drug ritonavir.	c1(ccccc1)C[C@H](NC(=O)COc1c(cccc1C)C)[C@H](C[C@@H](NC(=O)[C@@H](N1CCCNC1=O)C(C)C)Cc1ccccc1)O
TM-L4	817	-3.19744	TRUE	TRUE	TRUE	Miconazole nitrate	Miconazole nitrate, an imidazole antifungal agent, selectively affects the integrity of fungal cell membranes, high in ergosterol content and different in composition from mammalian cells membranes.	O[N+](=O)[O-].Clc1cc(Cl)c(COC(Cn2ccnc2)c2c(Cl)cc(Cl)cc2)cc1
TM-L4	822	-3.19451	TRUE	TRUE	TRUE	Clofarabine	Clofarabinem, a second generation purine nucleoside analog with antineoplastic activity, inhibits the enzymatic activities of ribonucleotide reductase (IC50 = 65 nM) and DNA polymerase.	Nc1nc(Cl)nc2n(cnc12)[C@@H]1O[C@H](CO)[C@@H](O)[C@@H]1F
L1200	666	-3.163	TRUE	TRUE	TRUE	S-Ruxolitinib (INCB018424)	S-Ruxolitinib is the chirality of INCB018424, which is the first potent, selective, JAK1/2 inhibitor to enter the clinic with IC50 of 3.3 nM/2.8 nM, >130-fold selectivity for JAK1/2 versus JAK3. Phase 3.	N1C2=C(C(=NC=1)C3=CN(N=C3)[C@H](C4CCCC4)CC#N)C=CN2
L2300	609	-3.15584	TRUE	TRUE	TRUE	Ispinesib (SB-715992)	Ispinesib (SB-715992, CK0238273) is a potent, specific and reversible inhibitor of KSP (HsEg5) with Ki of 1.7 nM.	C1=CC(=CC=C1)CN2C(C3=C(N=C2[C@H](N(CCCN)C(C4=CC=C(C=C4)C)=O)C(C)C)C=C(C=C3)Cl)=O
LOPAC	747	-3.12121	TRUE	TRUE	TRUE	Tyrphostin AG 538	Insulin growth factor 1 (IGF-1) receptor protein tyrosine kinase inhibitor	CCOC(=O)CN1C(=O)C2=CC=C3C(=O)N(CC(=O)OCC)C(=O)C4=C3C2=C(C=C4)C1=O
14030	988	-3.11324	TRUE	TRUE	TRUE	MICONAZOLE NITRATE	antifungal (topical)	O[N+]([O-])=O.ClC1=CC(Cl)=C(COC(CN2C=CN=C2)C2=CC=C(Cl)C=C2Cl)C=C1
14030	598	-3.11087	TRUE	TRUE	TRUE	ETHINYL ESTRADIOL	estrogen, plus progestogen as oral contraceptive	C[C@]12CCC3C(CCC4=C3C=CC(O)=C4)C1CC[C@@]2(O)C#C
L2300	814	-3.10485	TRUE	TRUE	TRUE	Nutlin-3	Nutlin-3 is a potent and selective Mdm2 antagonist with IC50 of 90 nM.	N1(C(C(N=C1C2=C(C=C(C=C2)OC)OC(C)C)C3=CC=C(C=C3)Cl)C4=CC=C(C=C4)Cl)C(=O)N5CCNC(C5)=O
LOPAC	706	-3.08508	TRUE	TRUE	TRUE	Ropinirole hydrochloride	Agonist at the D2 and D3 dopamine receptor subtypes, binding with higher affinity to D3 than to D2 or D4	Cl.CCCN(CCC)CCC1=C2CC(=O)NC2=CC=C1
14030	551	-3.0701	TRUE	TRUE	TRUE	CETYLPYRIDINIUM CHLORIDE	antiinfective (topical)	[Cl-].CCCCCCCCCCCCCCCC[N+]1=CC=CC=C1
TM-L4	795	-3.01852	TRUE	TRUE	TRUE	voxelotor	voxelotor is an inhibitor of sickle hemoglobin (HbS)	CC(C)n1nccc1-c1ncccc1COc1cccc(O)c1C=O
LOPAC	868	-3.01551	TRUE	TRUE	TRUE	L-162,313	Non-peptide AT1 angiotensin II receptor agonist	CCCCOC(=O)NS(=O)(=O)C1=C(C=C(CC(C)C)S1)C1=CC=C(CN2C(CC)=NC3=C(C)C=C(C)N=C23)C=C1
TM-L4	826	-3.01167	TRUE	TRUE	TRUE	Nordihydroguaiaretic acid	Nordihydroguaiaretic acid (NDGA) is a phenolic antioxidant found in the leaves and twigs of the evergreen desert shrub, Larrea tridentata (Sesse and Moc. ex DC) Coville (creosote bush). It is a recognized inhibitor of lipoxygenase (LOX) and has antioxidant and free radical scavenging properties.	CC(CC1=CC(=C(C=C1)O)O)C(C)CC2=CC(=C(C=C2)O)O
TM-L4	838	-3.00215	TRUE	TRUE	TRUE	Noradrenaline bitartrate monohydrate	Noradrenaline bitartrate monohydrate is a direct alpha-adrenergic receptors stimulator.	O.O[C@H]([C@@H](O)C(O)=O)C(O)=O.NC[C@H](O)c1ccc(O)c(O)c1
LOPAC	796	-3.00167	TRUE	TRUE	TRUE	TNP	TNP is a potent and selective IP6K inhibitor; less selective inhibitor of IP3K.	[O-][N+](=O)C1=CC=C(CNC2=C3N=CNC3=NC(NCC3=CC=CC(=C3)C(F)(F)F)=N2)C=C1
L1900	828	-2.9883	FALSE	TRUE	TRUE	RVX-208	RVX-208 is a potent BET bromodomain inhibitor with IC50 of 0.510 μM for BD2, about 170-fold selectivity over BD1. Phase 2.	C1(=CC(=C2C(=C1)N=C(NC2=O)C3=CC(=C(C(=C3)C)OCCO)C)OC)OC
LOPAC	686	-2.93863	FALSE	TRUE	TRUE	L-Tryptophan	Antidepressant; precursor of serotonin	N[C@@H](CC1=CNC2=C1C=CC=C2)C(O)=O
L1200	686	-2.90255	FALSE	TRUE	TRUE	AT7867	AT7867 is a potent ATP-competitive inhibitor of Akt1/2/3 and p70S6K/PKA with IC50 of 32 nM/17 nM/47 nM and 85 nM/20 nM, respectively; little activity outside the AGC kinase family.	C1(=CC=C(C=C1)C2(C3=CC=C(C=C3)C4=CNN=C4)CCNCC2)Cl
14030	809	-2.88117	FALSE	TRUE	TRUE	TRICLOSAN	antiinfective	OC1=C(OC2=CC=C(Cl)C=C2Cl)C=CC(Cl)=C1
14030	883	-2.87548	FALSE	TRUE	TRUE	GLAFENINE	analgesic	OCC(O)COC(=O)C1=CC=CC=C1NC1=CC=NC2=CC(Cl)=CC=C12
TM-L4	845	-2.84639	FALSE	TRUE	TRUE	Latanoprost	Latanoprost is a prostaglandin F2alpha analogue and a prostanoid selective FP receptor agonist with an ocular hypertensive effect.	CC(C)OC(=O)CCC\C=C/C[C@H]1[C@@H](O)C[C@@H](O)[C@@H]1CCC(O)CCc1ccccc1
LOPAC	790	-2.83426	FALSE	TRUE	TRUE	Triamterene	Na+ channel blocker; diuretic	NC1=NC2=C(N=C(C(N)=N2)C2=CC=CC=C2)C(N)=N1
TM-L4	698	-2.83117	FALSE	TRUE	TRUE	Ruxolitinib	Ruxolitinib is a potent and selective JAK1/2 inhibitor (IC50: 3.3/2.8 nM) and is relatively less selective for JAK3 (IC50: 322 nM).	N#CC[C@H](C1CCCC1)n1cc(cn1)-c1ncnc2[nH]ccc12
14030	618	-2.81931	FALSE	TRUE	TRUE	COLCHICINE	antimitotic, antigout agent	COC1=CC2=C(C(OC)=C1OC)C1=CC=C(OC)C(=O)C=C1[C@H](CC2)NC(C)=O
L1200	851	-2.76209	FALSE	TRUE	TRUE	A66	A66 is a potent and specific p110α inhibitor with IC50 of 32 nM, >100 fold selectivity for p110α over other class-I PI3K isoforms.	C1SC(=NC=1C2SC(=NC=2C)NC(N3[C@@H](CCC3)C(=O)N)=O)C(C)(C)C
LOPAC	706	-2.75278	FALSE	TRUE	TRUE	GBR-12909 dihydrochloride	Selective dopamine reuptake inhibitor	Cl.Cl.FC1=CC=C(C=C1)C(OCCN1CCN(CCCC2=CC=CC=C2)CC1)C1=CC=C(F)C=C1
L1200	884	-2.74002	FALSE	TRUE	TRUE	Brivanib (BMS-540215)	Brivanib is an ATP-competitive inhibitor against VEGFR2 with IC50 of 25 nM, moderate potency against VEGFR-1 and FGFR-1, but >240-fold against PDGFR-β. Phase 3.	C12=C(C(=C(C=C1)OC3=NC=NN4C3=C(C(=C4)OC[C@@H](C)O)C)F)C=C(N2)C
14030	961	-2.73248	FALSE	TRUE	TRUE	DIHYDROERGOTAMINE MESYLATE	vasoconstrictor, antimigraine	CS(O)(=O)=O.CN1C[C@@H](C[C@H]2[C@H]1CC1=CNC3=CC=CC2=C13)C(=O)N[C@]1(C)O[C@@]2(O)[C@@H]3CCCN3C(=O)[C@H](CC3=CC=CC=C3)N2C1=O
LOPAC	831	-2.72655	FALSE	TRUE	TRUE	(-)-Scopolamine methyl bromide	Competitive muscarinic acetylcholine receptor antagonist	[Br-].C[N+]1(C)C2CC(CC1C1OC21)OC(=O)[C@H](CO)C1=CC=CC=C1
LOPAC	696	-2.70838	FALSE	TRUE	TRUE	L-Canavanine sulfate	Selective inhibitor of inducible nitric oxide synthase (iNOS)	OS(O)(=O)=O.N[C@@H](CCONC(N)=N)C(O)=O
TM-L4	868	-2.69902	FALSE	TRUE	TRUE	Salmeterol Xinafoate	Salmeterol Xinafoate is a long-acting β2-adrenergic receptor agonist with anti-inflammatory effects, used in the treatment of asthma symptoms and chronic obstructive pulmonary disease (COPD) symptoms.	OCc1cc(ccc1O)C(O)CNCCCCCCOCCCCc2ccccc2.O=C(O)c2ccc1ccccc1c2O
TM-L4	771	-2.69645	FALSE	TRUE	TRUE	Enasidenib	Enasidenib is an orally available inhibitor of specific mutant forms of the mitochondrial enzyme isocitrate dehydrogenase type 2 (IDH2), with potential antineoplastic activity.	CC(C)(O)CNc1nc(Nc2ccnc(c2)C(F)(F)F)nc(n1)-c1cccc(n1)C(F)(F)F
LOPAC	802	-2.69197	FALSE	TRUE	TRUE	R-(+)-7-Hydroxy-DPAT hydrobromide	Selective D3 dopamine receptor agonist; active enantiomer of (±)-7-hydroxy-DPAT	Br.CCCN(CCC)[C@@H]1CCC2=CC=C(O)C=C2C1
pfizer	677	-2.69013	FALSE	TRUE	TRUE	CP-316819	Neurobiology	CON(C)C(=O)[C@H](O)[C@H](CC1=CC=CC=C1)NC(=O)C1=CC2=C(N1)C=CC(Cl)=C2
LOPAC	771	-2.68346	FALSE	TRUE	TRUE	DCEBIO	Increases epithelial chloride secretion through the synergistic activation of a basolateral membrane-located K+ channel (hlK1) and an apical membrane Cl- conductance	CCN1C(=O)NC2=CC(Cl)=C(Cl)C=C12
14030	885	-2.67842	FALSE	TRUE	TRUE	ERGONOVINE MALEATE	oxytocic, 5HT antagonist	OC(=O)\C=C/C(O)=O.CC(CO)NC(=O)C1CN(C)[C@@H]2CC3=CNC4=C3C(=CC=C4)C2=C1
TM-L4	694	-2.66849	FALSE	TRUE	TRUE	Baricitinib Phosphate	Baricitinib phosphate is a selective orally bioavailable JAK1/JAK2 inhibitor.	OP(=O)(O)O.CCS(=O)(=O)N1CC(CC#N)(C1)n1cc(cn1)c1c2cc[nH]c2ncn1
LOPAC	877	-2.65439	FALSE	TRUE	TRUE	Aprindine hydrochloride	Class Ib antiarrhythmic and hERG channel blocker.	Cl.CCN(CC)CCCN(C1CC2=CC=CC=C2C1)C1=CC=CC=C1
LOPAC	590	-2.62741	FALSE	TRUE	TRUE	N-Desmethylclozapine	Major metabolite of clozapine; potent 5-HT2 serotonin receptor antagonist and a ligand for the cloned 5-HT6 and 5-HT7 serotonin receptors. Also an allosteric potentiator of M1 muscarinic receptors	ClC1=CC2=C(NC3=C(C=CC=C3)C(=N2)N2CCNCC2)C=C1
LOPAC	793	-2.61926	FALSE	TRUE	TRUE	ET-18-OCH3	Phosphoinositide-specific Phospholipase C (PI-PLC) inhibitor	CCCCCCCCCCCCCCCCCCOC[C@H](COP([O-])(=O)OCC[N+](C)(C)C)OC
TM-L4	708	-2.61226	FALSE	TRUE	TRUE	Methylene Blue trihydrate	Methylene blue is a compound consisting of dark green crystals or crystalline powder, having a bronze-like luster. Solutions in water or alcohol have a deep blue color. Methylene blue is used as a bacteriologic stain and as an indicator. It inhibits soluble guanylyl cyclase and has been used to treat cyanide poisoning and to lower levels of methemoglobin. It also inhibits tau filament formation (…	O.O.O.[Cl-].CN(C)c1ccc2nc3cc\c(cc3sc2c1)=[N+](/C)C
LOPAC	788	-2.60765	FALSE	TRUE	TRUE	(±)-SKF-38393 hydrochloride	D1 Dopamine receptor agonist	Cl.OC1=CC2=C(C=C1O)C(CNCC2)C1=CC=CC=C1
TM-L4	703	-2.60683	FALSE	TRUE	TRUE	Amodiaquine hydrochloride	Amodiaquine Hydrochloride is the hydrochloride salt of amodiaquine, an orally active 4-aminoquinoline derivative with antimalarial and anti-inflammatory properties.	O.Cl.CCN(CC)Cc1c(O)ccc(Nc2c3ccc(Cl)cc3ncc2)c1.O.Cl
14030	660	-2.59976	FALSE	TRUE	TRUE	beta-LAPACHONE	antineoplastic, DNA topoisomerase I inhibitor	CC1(C)CCC2=C(O1)C1=CC=CC=C1C(=O)C2=O
L2300	750	-2.59501	FALSE	TRUE	TRUE	Ezetimibe (Zetia)	Ezetimibe (Zetia) is a compound that lowers cholesterol.	C1=C(C=CC(=C1)[C@H](CC[C@H]2C(N([C@H]2C3=CC=C(C=C3)O)C4=CC=C(C=C4)F)=O)O)F
L1900	791	-2.58231	FALSE	TRUE	TRUE	RG2833 (RGFP109)	RG2833 (RGFP109) is a brain-penetrant HDAC inhibitor with IC50 of 60 nM and 50 nM for HDAC1 and HDAC3, respectively.	C1(=CC=C(C=C1)C(=O)NCCCCCC(NC2=CC=CC=C2N)=O)C
LOPAC	864	-2.56573	FALSE	TRUE	TRUE	R(-)-2,10,11-Trihydroxy-N-propylnoraporphine hydrobromide	Potent and selective D2 dopamine receptor agonist	Br.CCCN1CCC2=CC(O)=CC3=C2[C@H]1CC1=C3C(O)=C(O)C=C1
L1200	684	-2.56274	FALSE	TRUE	TRUE	CNX-774	CNX-774 is an irreversible, orally active, and highly selective BTK inhibitor with IC50 of <1 nM.	C1=C(C=C(C=C1)NC(C=C)=O)NC2=C(C=NC(=N2)NC3=CC=C(C=C3)OC4=CC=NC(=C4)C(NC)=O)F
14030	628	-2.55783	FALSE	TRUE	TRUE	NYLIDRIN HYDROCHLORIDE	vasodilator (peripheral)	Cl.CC(CCC1=CC=CC=C1)NC(C)C(O)C1=CC=C(O)C=C1
14030	565	-2.54588	FALSE	TRUE	TRUE	NALOXONE HYDROCHLORIDE	narcotic antagonist	Cl.OC1=C2O[C@H]3C(=O)CC[C@@]4(O)[C@H]5CC(C=C1)=C2C34CCN5CC=C
14030	894	-2.5276	FALSE	TRUE	TRUE	EPINEPHRINE BITARTRATE	adrenergic agonist, bronchodilator, antiglaucoma agent	OC(C(O)C(O)=O)C(O)=O.CNC[C@@H](O)C1=CC=C(O)C(O)=C1
14030	790	-2.50807	FALSE	TRUE	TRUE	LIOTHYRONINE (L- isomer) SODIUM	thyroid hormone	[Na+].N[C@@H](CC1=CC(I)=C(OC2=CC(I)=C(O)C=C2)C(I)=C1)C([O-])=O
pfizer	898	-2.48523	FALSE	TRUE	TRUE	CP-100356	Multi drug resistance	Cl.COC1=CC2=C(CN(CC2)C2=NC(NCCC3=CC(OC)=C(OC)C=C3)=NC3=C2C=C(OC)C(OC)=C3)C=C1OC
LOPAC	829	-2.4812	FALSE	TRUE	TRUE	(±)-Norepinephrine (+)bitartrate	Adrenergic neurotransmitter	O[C@H]([C@@H](O)C(O)=O)C(O)=O.NCC(O)C1=CC(O)=C(O)C=C1
L1200	632	-2.48058	FALSE	TRUE	TRUE	AG-1478 (Tyrphostin AG-1478)	AG-1478 (Tyrphostin AG-1478) is a selective EGFR inhibitor with IC50 of 3 nM, almost no activity on HER2-Neu, PDGFR, Trk, Bcr-Abl and InsR.	C1=C2C(=CC(=C1OC)OC)C(=NC=N2)NC3=CC(=CC=C3)Cl
14030	538	-2.47916	FALSE	TRUE	TRUE	INDOPROFEN	analgesic, antiinflammatory	CC(C(O)=O)C1=CC=C(C=C1)N1CC2=C(C=CC=C2)C1=O
L1900	755	-2.47154	FALSE	TRUE	TRUE	Pacritinib (SB1518)	Pacritinib (SB1518) is a potent and selective inhibitor of Janus Kinase 2 (JAK2) and Fms-Like Tyrosine Kinase-3 (FLT3) with IC50s of 23 and 22 nM, respectively.	C1=CN=C2N=C1C3=CC(=CC=C3)COC/C=C/COCC4=CC(=CC=C4OCCN5CCCC5)N2
14030	529	-2.46314	FALSE	TRUE	TRUE	EUCALYPTOL	anthelmintic, antiseptic, expectorant	C[C@@]12CC[C@@H](CC1)C(C)(C)O2
LOPAC	831	-2.41765	FALSE	TRUE	TRUE	CIQ	CIQ is positive allosteric modulator of NR2C/NR2D subunit containing NMDA receptors.	COC1=CC=C(OCC2N(CCC3=CC(OC)=C(OC)C=C23)C(=O)C2=CC(Cl)=CC=C2)C=C1
LOPAC	707	-2.41475	FALSE	TRUE	TRUE	CP-135807	CP-135807 is a selective 5-HT1D agonist	CN1CCC[C@@H]1CC1=CNC2=CC=C(NC3=C(C=CC=N3)[N+]([O-])=O)C=C12
L1200	763	-2.41087	FALSE	TRUE	TRUE	PD168393	PD168393 is an irreversible EGFR inhibitor with IC50 of 0.70 nM, irreversibly alkylate Cys-773; inactive against insulin, PDGFR, FGFR and PKC.	C1=C(C=C2C(=C1)N=CN=C2NC3=CC=CC(=C3)Br)NC(C=C)=O
LOPAC	782	-2.38605	FALSE	TRUE	TRUE	SDZ-205,557 hydrochloride	Potent and selective 5-HT4 serotonin receptor antagonist	Cl.CCN(CC)CCOC(=O)C1=C(OC)C=C(N)C(Cl)=C1
L2300	802	-2.38574	FALSE	TRUE	TRUE	GSK 269962		C(C1C=CC(=CC=1)OCCN2CCOCC2)(=O)NC3C=C(C=CC=3)OC4=CC5=C(C=N4)N=C(N5CC)C6C(=NON=6)N
TM-L4	777	-2.37575	FALSE	TRUE	TRUE	Nisoldipine	Nisoldipine is a dihydropyridine calcium channel antagonist that acts as a potent arterial vasodilator and antihypertensive agent.	COC(=O)C1=C(C)NC(=C(C1c1ccccc1[N+](=O)[O-])C(=O)OCC(C)C)C
LOPAC	868	-2.37541	FALSE	TRUE	TRUE	PPADS	Selective P2 receptor antagonist which blocks responses at both pre- and post-junctional sites	[Na+].[Na+].[Na+].[Na+].CC1=C(O)C(C=O)=C(COP([O-])([O-])=O)C(\N=N\C2=C(C=C(C=C2)S([O-])(=O)=O)S([O-])(=O)=O)=N1
14030	740	-2.37246	FALSE	TRUE	TRUE	CETYLPYRIDINIUM CHLORIDE	antiinfective (topical)	[Cl-].CCCCCCCCCCCCCCCC[N+]1=CC=CC=C1
TM-L4	783	-2.37231	FALSE	TRUE	TRUE	Fidaxomicin	Fidaxomicin is a semisynthetic macrolide antibiotic used to treat Clostridium difficile-associated diarrhea in adults. Fidaxomicin has minimal systemic absorption and has not been linked to serum enzyme elevations during therapy or to instances of clinically apparent, acute liver injury.	CC[C@H]1\C=C(C)\[C@@H](O)C\C=C\C=C(CO[C@@H]2O[C@H](C)[C@@H](OC(=O)c3c(O)c(Cl)c(O)c(Cl)c3CC)[C@H](O)[C@@H]2OC)\C(=O)O[C@@H](C\C=C(C)\C=C(C)\[C@@H]1O[C@@H]1OC(C)(C)[C@@H](OC(=O)C(C)C)[C@H](O)[C@@H]1O)[C@@H](C)O
LOPAC	890	-2.35663	FALSE	TRUE	TRUE	CP-471474	CP-471474 is a broad spectrum inhibitor of matrix metalloproteinases	CC(C)(NS(=O)(=O)C1=CC=C(OC2=CC=C(F)C=C2)C=C1)C(=O)NO
LOPAC	865	-2.35206	FALSE	TRUE	TRUE	SKF 83959 hydrobromide	Atypical D1 dopamine receptor agonist; displays antagonist activity in vitro and agonist activity in vivo	Br.CN1CCC2=C(Cl)C(O)=C(O)C=C2C(C1)C1=CC=CC(C)=C1
14030	758	-2.34349	FALSE	TRUE	TRUE	SELEGILINE HYDROCHLORIDE	antidepressant, MAO inhibitor, antiparkinsonian	Cl.CC(CC1=CC=CC=C1)N(C)CC#C
14030	685	-2.28852	FALSE	TRUE	TRUE	SCOPOLAMINE HYDROBROMIDE	anticholinergic, treatment of motion sickness	Br.CN1C2CC(C[C@H]1[C@H]1OC21)OC(=O)[C@H](CO)C1=CC=CC=C1
LOPAC	752	-2.28819	FALSE	TRUE	TRUE	R(-)-Isoproterenol (+)-bitartrate	Sympathomimetic amine acting almost exclusively on beta adrenoceptors; bronchodilator; active enantiomer of Isoproterenol	O[C@@H]([C@H](O)C(O)=O)C(O)=O.CC(C)NC[C@H](O)C1=CC=C(O)C(O)=C1
L2300	762	-2.25068	FALSE	TRUE	TRUE	SHAM CONTROL	SHAM CONTROL	SHAM CONTROL
L1200	675	-2.24684	FALSE	TRUE	TRUE	TG100713	TG100713 is a pan-PI3K inhibitor against PI3Kγ, PI3Kδ, PI3Kα and PI3Kβ with IC50 of 50 nM, 24 nM, 165 nM and 215 nM, respectively.	C1(C=C(C=CC=1)C2=NC3=C(N=C(N=C(N=C2)3)N)N)O
14030	601	-2.21786	FALSE	TRUE	TRUE	SALICYLANILIDE	antipyretic, fungicide	OC1=CC=CC=C1C(=O)NC1=CC=CC=C1
L1200	840	-2.2113	FALSE	TRUE	TRUE	Piceatannol	Piceatannol, a natural stilbene, is a selective Syk inhibitor and ~10-fold selectivity versus Lyn.	C1(C(=CC(=CC=1)/C=C/C2C=C(C=C(C=2)O)O)O)O
TM-L4	815	-2.19098	FALSE	TRUE	TRUE	Fenoldopam mesylate	Fenoldopam is a selective dopamine-1 receptor (DA1) agonist with natriuretic/diuretic properties. It lowers blood pressure through arteriolar vasodilation.	CS(O)(=O)=O.OC1=CC=C(C=C1)C1CNCCC2=C(Cl)C(O)=C(O)C=C12
TM-L4	807	-2.18532	FALSE	TRUE	TRUE	Bepridil hydrochloride	Bepridil is a calcium channel blocker and also inhibits Na+/Ca2+ exchange (NCX), sodium channels and cardiac sarcolemmal KATP channels.	Cl.CC(C)COCC(CN(Cc1ccccc1)c1ccccc1)N1CCCC1
14030	492	-2.18046	FALSE	TRUE	TRUE	MAPROTILINE HYDROCHLORIDE	antidepressant	Cl.CNCCCC12CCC(C3=CC=CC=C13)C1=C2C=CC=C1
LOPAC	744	-2.17473	FALSE	TRUE	TRUE	NS8593 hydrochloride	Blocks small conductance Ca2+ activated K+ channels	Cl.C1C[C@@H](NC2=NC3=CC=CC=C3N2)C2=C(C1)C=CC=C2
L2300	589	-2.16308	FALSE	TRUE	TRUE	Pelitinib (EKB-569)	Pelitinib (EKB-569) is a potent EGFR inhibitor with IC50 of 38.5 nM.	C1(=C(C=C2C(=C1)N=CC(=C2NC3=CC(=C(C=C3)F)Cl)C#N)NC(/C=C/CN(C)C)=O)OCC
LOPAC	786	-2.15311	FALSE	TRUE	TRUE	Clomipramine hydrochloride	Serotonin reuptake inhibitor; antidepressant	Cl.CN(C)CCCN1C2=C(CCC3=C1C=C(Cl)C=C3)C=CC=C2
L1200	661	-2.15208	FALSE	TRUE	TRUE	GSK2636771	GSK2636771 is a potent, orally bioavailable, PI3Kβ-selective inhibitor, sensitive to PTEN null cell lines. Phase 1/2a.	C1=C(C=C2C(=C1C(=O)O)N=C(N2CC3=CC=CC(=C3C)C(F)(F)F)C)N4CCOCC4
L1200	730	-2.15024	FALSE	TRUE	TRUE	MK-2461	Inhibitor of c-Met(WT/mutants), less potent to Ron, Flt1	C12=C(C(C3=C(C=C1)C=CC(=C3)NS(N(C[C@H]4OCCOC4)C)(=O)=O)=O)C=C(C=N2)C5=CN(N=C5)C
TM-L4	611	-2.13825	FALSE	TRUE	TRUE	Candesartan Cilexetil	Candesartan Cilexetil is an angiotensin II receptor antagonist (IC50: 0.26 nM). After hydrolysis of candesartan cilexetil to candesartan during gastrointestinal absorption, candesartan selectively competes with angiotensin II for the binding of the angiotensin II receptor subtype 1 (AT1) in vascular smooth muscle, blocking angiotensin II-mediated vasoconstriction and inducing vasodilatation.	CCOc1nc2cccc(C(=O)OC(C)OC(=O)OC3CCCCC3)c2n1Cc1ccc(cc1)c1ccccc1c1n[nH]nn1
14030	679	-2.12505	FALSE	TRUE	TRUE	RIVASTIGMINE TARTRATE	acetylcholinesterase inhibitor	O[C@H]([C@@H](O)C(O)=O)C(O)=O.CCN(C)C(=O)OC1=CC=CC(=C1)[C@H](C)N(C)C
L1200	878	-2.11002	FALSE	TRUE	TRUE	Icotinib	Icotinib is a potent and specific EGFR inhibitor with IC50 of 5 nM, including the EGFR, EGFR(L858R), EGFR(L861Q), EGFR(T790M) and EGFR(T790M, L858R). Phase 4.	C1=C(C=CC=C1NC2=NC=NC3=C2C=C4C(=C3)OCCOCCOCCO4)C#C
14030	875	-2.1068	FALSE	TRUE	TRUE	ABAMECTIN (avermectin B1a shown)	antiparisitic	CCC(C)[C@H]1O[C@@]2(C[C@@H]3C[C@@H](C\C=C(C)\[C@@H](OC4C[C@H](OC)C(O[C@H]5C[C@H](OC)[C@@H](O)[C@H](C)O5)[C@H](C)O4)[C@@H](C)\C=C\C=C4/CO[C@@H]5[C@H](O)C(C)=C[C@@H](C(=O)O3)[C@]45O)O2)C=C[C@@H]1C
14030	813	-2.10508	FALSE	TRUE	TRUE	DICHLOROPHEN	anthelmintic	OC1=CC=C(Cl)C=C1CC1=C(O)C=CC(Cl)=C1
TM-L4	793	-2.082	FALSE	TRUE	TRUE	Clobetasol propionate	Clobetasol propionate exerts its effect by binding to cytoplasmic glucocorticoid receptors and subsequently activates glucocorticoid receptor-mediated gene expression. This results in the synthesis of certain anti-inflammatory proteins while inhibiting the synthesis of certain inflammatory mediators. Clobetasol Propionate is the propionate salt form of clobetasol, a topical synthetic corticostero…	[C@]1([C@@]2([C@@H](C[C@@H]1C)[C@H]1[C@]([C@H](C2)O)([C@@]2(C(=CC(=O)C=C2)CC1)C)F)C)(OC(=O)CC)C(=O)CCl
L1200	802	-2.06812	FALSE	TRUE	TRUE	CYC116	CYC116 is a potent inhibitor of Aurora A/B with Ki of 8.0 nM/9.2 nM, is less potent to VEGFR2 (Ki of 44 nM), with 50-fold greater potency than CDKs, not active against PKA, Akt/PKB, PKC, no effect on GSK-3α/β, CK2, Plk1 and SAPK2A. Phase 1.	C1(=NC=CC(=N1)C2SC(=NC=2C)N)NC3=CC=C(C=C3)N4CCOCC4
TM-L4	860	-2.06555	FALSE	TRUE	TRUE	Sulconazole Nitrate	Sulconazole Nitrate is the nitrate salt form of sulconazole, a synthetic imidazole derivative with the antifungal property. Sulconazole nitrate inhibits fungal cytochrome P-450 sterol C-14 alpha-demethylation, resulting in the accumulation of fungal 14 alpha-methyl sterols and inhibition of the synthesis of ergosterol, an important component of the fungal cell membrane. Inhibition of ergosterol s…	c1cc(ccc1CSC(Cn1ccnc1)c1c(cc(cc1)Cl)Cl)Cl.[N+](=O)(O)[O-]
LOPAC	822	-2.06524	FALSE	TRUE	TRUE	N-Methyldopamine hydrochloride	Dopamine receptor agonist	Cl.CNCCC1=CC=C(O)C(O)=C1
14030	625	-2.05973	FALSE	TRUE	TRUE	LEVONORDEFRIN	vasoconstrictor	C[C@H](N)[C@H](O)C1=CC=C(O)C(O)=C1
14030	596	-2.05346	FALSE	TRUE	TRUE	DIGOXIN	cardiac stimulant	C[C@H]1O[C@H](C[C@H](O)[C@@H]1O)O[C@H]1[C@@H](O)C[C@H](O[C@H]2[C@@H](O)C[C@H](O[C@H]3CC[C@@]4(C)[C@H](CCC5C4C[C@@H](O)[C@]4(C)[C@H](CC[C@]54O)C4=CC(=O)OC4)C3)O[C@@H]2C)O[C@@H]1C
14030	896	-2.04223	FALSE	TRUE	TRUE	DOPAMINE HYDROCHLORIDE	cardiotonic, antihypotensive	Cl.NCCC1=CC=C(O)C(O)=C1
14030	796	-2.03682	FALSE	TRUE	TRUE	OMEPRAZOLE	gastric acid depressant	COC1=CC2=C(C=C1)N=C(N2)S(=O)CC1=NC=C(C)C(OC)=C1C
LOPAC	798	-2.03412	FALSE	TRUE	TRUE	Hydroxylamine hydrochloride	Monoamine oxidase inhibitor	Cl.NO
TM-L4	745	-2.01954	FALSE	TRUE	TRUE	Alectinib	CH5424802 is an orally available inhibitor of the receptor tyrosine kinase anaplastic lymphoma kinase (ALK) with antineoplastic activity.	CCc1c(cc2c(c1)C(=O)c1c([nH]c3c1ccc(c3)C#N)C2(C)C)N1CCC(CC1)N1CCOCC1
14030	497	-2.01607	FALSE	TRUE	TRUE	METHOCARBAMOL	muscle relaxant (skeletal)	COC1=CC=CC=C1OCC(O)COC(N)=O
LOPAC	778	-2.01483	FALSE	TRUE	TRUE	Tyrphostin 1	EGFR tyrosine kinase inhibitor	COC1=CC=C(C=C(C#N)C#N)C=C1
TM-L4	801	-2.00477	FALSE	TRUE	TRUE	Bromocriptine mesylate	Bromocriptine is a potent dopamine receptor agonist that binds the D2 receptor with highest affinity (Ki = 2.5 nM)	CS(O)(=O)=O.CC(C)C[C@@H]1N2C(=O)[C@](NC(=O)[C@H]3CN(C)[C@@H]4Cc5c(Br)[nH]c6cccc(C4=C3)c56)(O[C@@]2(O)[C@@H]2CCCN2C1=O)C(C)C
14030	892	-2.00083	FALSE	TRUE	TRUE	SECURININE	GABAA receptor blocker, CNS stimulant	O=C1O[C@@]23C[C@@H](C=CC2=C1)N1CCCC[C@H]31
TM-L4	635	-1.99676	FALSE	TRUE	TRUE	Clomifene citrate	Clomifene Citrate is a selective estrogen receptor modulator.	OC(=O)CC(O)(CC(O)=O)C(O)=O.CCN(CC)CCOc1ccc(cc1)C(=C(Cl)c1ccccc1)c1ccccc1
LOPAC	726	-1.9952	FALSE	TRUE	TRUE	Trifluperidol hydrochloride	Dopamine receptor antagonist; antipsychotic	Cl.OC1(CCN(CCCC(=O)C2=CC=C(F)C=C2)CC1)C1=CC=CC(=C1)C(F)(F)F
14030	840	-1.9772	FALSE	TRUE	TRUE	FENOLDOPAM MESYLATE	antihypertensive, dopamine agonist	CS(O)(=O)=O.OC1=CC=C(C=C1)C1CNCCC2=C(Cl)C(O)=C(O)C=C12
LOPAC	873	-1.97273	FALSE	TRUE	TRUE	Terbutaline hemisulfate	beta-Adrenoceptor agonist; bronchodilator	OS(O)(=O)=O.CC(C)(C)NCC(O)C1=CC(O)=CC(O)=C1.CC(C)(C)NCC(O)C1=CC(O)=CC(O)=C1
TM-L4	657	-1.96554	FALSE	TRUE	TRUE	Amoxapine	Amoxapine exerts its antidepressant effect by inhibiting the re-uptake of norepinephrine and, to a lesser degree, of serotonin, at adrenergic nerve endings and blocks the response of dopamine receptors to dopamine. Amoxapine is a tricyclic antidepressant of the dibenzoxazepine class. This drug is used to treat symptoms of depression and may cause tardive dyskinesia. Amoxapine also binds to alpha-…	Clc1cc2c(Oc3ccccc3N=C2N2CCNCC2)cc1
LOPAC	760	-1.9524	FALSE	TRUE	TRUE	ML-9	Myosin light chain kinase (MLCK) inhibitor	Cl.ClC1=C2C=CC=C(C2=CC=C1)S(=O)(=O)N1CCCNCC1
TM-L4	660	-1.92813	FALSE	TRUE	TRUE	Cephalexin	Cefalexin is a cephalosporin antibiotic.	S1CC(=C(N2[C@H]1[C@@H](C2=O)NC(=O)[C@@H](c1ccccc1)N)C(=O)O)C
LOPAC	727	-1.92217	FALSE	TRUE	TRUE	Anisotropine methyl bromide	is a muscarinic antagonist and antispasmodic	[Br-].CCCC(CCC)C(=O)OC1CC2CCC(C1)[N+]2(C)C
14030	707	-1.91983	FALSE	TRUE	TRUE	PROPRANOLOL HYDROCHLORIDE (+/-)	antihypertensive, antianginal, antiarrhythmic	Cl.CC(C)NCC(O)COC1=C2C=CC=CC2=CC=C1
14030	933	-1.91358	FALSE	TRUE	TRUE	PHENYLEPHRINE HYDROCHLORIDE	mydriatic, decongestant	Cl.CNC[C@H](O)C1=CC(O)=CC=C1
14030	813	-1.91331	FALSE	TRUE	TRUE	HEXESTROL	estrogen, antineoplastic (hormonal)	CCC(C(CC)C1=CC=C(O)C=C1)C1=CC=C(O)C=C1
TM-L4	692	-1.90254	FALSE	TRUE	TRUE	Toremifene citrate	Toremifene citrate is a selective estrogen receptor modulator (SERM). It is an estrogen agonist for bone tissue and cholesterol metabolism but is antagonistic on the mammary and uterine tissue.	C(=C(\c1ccccc1)/CCCl)(\c1ccc(cc1)OCCN(C)C)/c1ccccc1.C(CC(=O)O)(CC(=O)O)(C(=O)O)O
LOPAC	775	-1.87757	FALSE	TRUE	TRUE	SB 242084 dihydrochloride hydrate	Selective 5-HT2c serotonin receptor antagonist; crosses the blood-brain barrier	Cl.Cl.CC1=CC2=C(C=C1Cl)N(CC2)C(=O)NC1=CN=C(OC2=CC=CN=C2C)C=C1
TM-L4	816	-1.86014	FALSE	TRUE	TRUE	Beclomethasone dipropionate	Beclomethasone Dipropionate is the dipropionate ester of a synthetic glucocorticoid with anti-inflammatory and immunomodulating properties. After cell surface receptor attachment and cell entry, beclomethasone enters the nucleus where it binds to and activates specific nuclear receptors, resulting in an altered gene expression and inhibition of proinflammatory cytokine production.	CCC(=O)OCC(=O)[C@@]1(OC(=O)CC)[C@@H](C)C[C@H]2[C@@H]3CCC4=CC(=O)C=C[C@]4(C)[C@@]3(Cl)[C@@H](O)C[C@]12C
LOPAC	769	-1.85714	FALSE	TRUE	TRUE	Fiduxosin hydrochloride	alpha1-Adrenoceptor antagonist	Cl.COC1=C2[C@@H]3CN(CCCCN4C(=O)NC5=C(SC6=NC=C(N=C56)C5=CC=CC=C5)C4=O)C[C@@H]3COC2=CC=C1
14030	708	-1.84976	FALSE	TRUE	TRUE	TRIPELENNAMINE CITRATE	antihistaminic	OC(=O)CC(O)(CC(O)=O)C(O)=O.CN(C)CCN(CC1=CC=CC=C1)C1=CC=CC=N1
14030	822	-1.83889	FALSE	TRUE	TRUE	APOMORPHINE HYDROCHLORIDE	emetic, antiparkinsonian, erextile dysfunction therapy	Cl.CN1CCC2=CC=CC3=C2C1CC1=CC=C(O)C(O)=C31
TM-L4	665	-1.83568	FALSE	TRUE	TRUE	Maprotiline hydrochloride	Maprotiline hydrochloride is a bridged-ring tetracyclic antidepressant that is both mechanistically and functionally similar to the tricyclic antidepressants, including side effects associated with its use.	Cl.CNCCCC12CCC(c3ccccc13)c1ccccc21
L1200	638	-1.82981	FALSE	TRUE	TRUE	CYT387	CYT387 is an ATP-competitive inhibitor of JAK1/JAK2 with IC50 of 11 nM/18 nM, ~10-fold selectivity versus JAK3. Phase 1/2.	C1=C(C=CC(=C1)NC2=NC=CC(=N2)C3=CC=C(C=C3)C(NCC#N)=O)N4CCOCC4
14030	905	-1.82636	FALSE	TRUE	TRUE	METHYLERGONOVINE MALEATE	oxytocic	OC(=O)\C=C/C(O)=O.CC[C@@H](CO)NC(=O)[C@H]1CN(C)[C@@H]2CC3=CNC4=CC=CC(=C34)C2=C1
14030	768	-1.81611	FALSE	TRUE	TRUE	PHENOTHIAZINE	anthelmintic	N1C2=CC=CC=C2SC2=C1C=CC=C2
TM-L4	778	-1.80964	FALSE	TRUE	TRUE	Verteporfin	Verteporfin, a benzoporphyrin derivative monoacid ring A, can inhibit the activity of YAP.	COC(=O)CCc1c(C)c2cc3[nH]c(cc4nc(cc5[nH]c(cc1n2)c(CCC(O)=O)c5C)c(C=C)c4C)C1=CC=C([C@@H](C(=O)OC)[C@@]31C)C(=O)OC.COC(=O)CCc1c(C)c2cc3nc(cc4[nH]c(cc5nc(cc1[nH]2)c(CCC(O)=O)c5C)[C@]1(C)[C@H](C(=O)OC)C(=CC=C41)C(=O)OC)c(C)c3C=C
14030	679	-1.80642	FALSE	TRUE	TRUE	ISORESERPINE	antineoplastic, antihypertensive	CO[C@H]1[C@@H](C[C@@H]2CN3CCC4=C(NC5=C4C=CC(OC)=C5)[C@@H]3C[C@@H]2[C@@H]1C(=O)OC)OC(=O)C1=CC(OC)=C(OC)C(OC)=C1
14030	582	-1.80438	FALSE	TRUE	TRUE	MEDRYSONE	glucocorticoid	C[C@H]1CC2C3CC[C@H](C(C)=O)[C@@]3(C)C[C@H](O)C2[C@@]2(C)CCC(=O)C=C12
TM-L4	715	-1.80009	FALSE	TRUE	TRUE	Vitamin D2	Ergocalciferol (Vitamin D2) is a derivative of ergosterol formed by ultraviolet rays breaking of the C9-C10 bond with a strong inhibitory effect against bladder tumor promotion by sodium saccharin, and it induces cell differentiation in leukemia cells. Vitamin D2 is an inhibitor of DNA Polymerase.	CC(C)[C@@H](C)\C=C\[C@@H](C)[C@H]1CC[C@@H]2[C@]1(C)CCC\C2=C/C=C1/C[C@@H](O)CCC1=C
14030	676	-1.78329	FALSE	TRUE	TRUE	BUDESONIDE	antiinflammatory	CCCC1O[C@@H]2CC3C4CCC5=CC(=O)C=CC5(C)C4[C@@H](O)CC3(C)[C@@]2(O1)C(=O)CO
L1900	836	-1.77078	FALSE	TRUE	TRUE	SHAM CONTROL	SHAM CONTROL	SHAM CONTROL
LOPAC	673	-1.76226	FALSE	TRUE	TRUE	Tranylcypromine hydrochloride	MAO inhibitor; antidepressant	Cl.NC1CC1C1=CC=CC=C1
14030	910	-1.7572	FALSE	TRUE	TRUE	PAPAVERINE HYDROCHLORIDE	muscle relaxant (smooth), cerebral vasodilator	Cl.COC1=CC=C(CC2=C3C=C(OC)C(OC)=CC3=CC=N2)C=C1OC
14030	939	-1.72226	FALSE	TRUE	TRUE	LEVONORDEFRIN	vasoconstrictor	C[C@H](N)[C@H](O)C1=CC=C(O)C(O)=C1
TM-L4	718	-1.71628	FALSE	TRUE	TRUE	Amphotericin B	Amphotericin B is an antifungal agent with a broad spectrum of activity against many fungal species.	C[C@H]1/C=C/C=C/C=C/C=C/C=C/C=C/C=C/[C@@H](C[C@H]2[C@@H]([C@H](C[C@](O2)(C[C@H](C[C@H]([C@@H](CC[C@H](C[C@H](CC(=O)O[C@H]([C@@H]([C@@H]1O)C)C)O)O)O)O)O)O)O)C(=O)O)O[C@H]3[C@H]([C@H]([C@@H]([C@H](O3)C)O)N)O
14030	827	-1.71594	FALSE	TRUE	TRUE	EPINEPHRINE BITARTRATE	adrenergic agonist, bronchodilator, antiglaucoma agent	OC(C(O)C(O)=O)C(O)=O.CNC[C@@H](O)C1=CC=C(O)C(O)=C1
14030	759	-1.71394	FALSE	TRUE	TRUE	SELAMECTIN	anthelmintic, antiparasitic, antimite	CO[C@H]1CC(O[C@H]2[C@@H](C)\C=C\C=C3/CO[C@@H]4\C(=N/O)C(C)=C[C@@H](C(=O)O[C@H]5C[C@@H](C\C=C2/C)O[C@@]2(CC[C@H](C)[C@H](O2)C2CCCCC2)C5)[C@]34O)O[C@@H](C)C1O
14030	843	-1.70748	FALSE	TRUE	TRUE	ESTRAMUSTINE	antineoplastic	C[C@]12CCC3C(CCC4=C3C=CC(OC(=O)N(CCCl)CCCl)=C4)C1CC[C@@H]2O
14030	851	-1.70687	FALSE	TRUE	TRUE	ANCITABINE HYDROCHLORIDE	antineoplastic	Cl.OC[C@@H]1O[C@H]2[C@H](OC3=NC(=N)C=CN23)[C@H]1O
14030	892	-1.67807	FALSE	TRUE	TRUE	HISTAMINE DIHYDROCHLORIDE	H1&2 agonist, edema induction, gastric secretion stimulant	Cl.Cl.NCCC1=CNC=N1
14030	670	-1.65926	FALSE	TRUE	TRUE	PROMETHAZINE HYDROCHLORIDE	antihistaminic	Cl.CC(CN1C2=C(SC3=C1C=CC=C3)C=CC=C2)N(C)C
14030	883	-1.64733	FALSE	TRUE	TRUE	AVERMECTIN A1a	antiparasitic	CCC(C)[C@H]1O[C@@]2(C[C@@H]3C[C@@H](C\C=C(C)\[C@@H](OC4C[C@H](OC)C(O[C@H]5C[C@H](OC)[C@@H](O)[C@H](C)O5)[C@H](C)O4)[C@@H](C)\C=C\C=C4/CO[C@@H]5[C@H](OC)C(C)=C[C@@H](C(=O)O3)[C@]45O)O2)C=C[C@@H]1C
14030	769	-1.64327	FALSE	TRUE	TRUE	DIMERCAPROL	chelating agent (As, Au, Hg antidote)	OCC(S)CS
14030	709	-1.64275	FALSE	TRUE	TRUE	THIOTHIXENE	antipsychotic	CN(C)S(=O)(=O)C1=CC2=C(SC3=C(C=CC=C3)\C2=C/CCN2CCN(C)CC2)C=C1
LOPAC	910	-1.63197	FALSE	TRUE	TRUE	Staurosporine aglycone	K-252c is a PKC inhibitor active at submicromolar concentrations. .	O=C1NCC2=C3C(NC4=C3C=CC=C4)=C3NC4=C(C=CC=C4)C3=C12
14030	492	-1.62923	FALSE	TRUE	TRUE	GUANABENZ ACETATE	antihypertensive	CC(O)=O.NC(=N)N\N=C/C1=C(Cl)C=CC=C1Cl
TM-L4	840	-1.62675	FALSE	TRUE	TRUE	DL-Adrenaline Hydrochloride	DL-Adrenaline Hydrochloride is the hydrochloride salt of the naturally occurring sympathomimetic amine with vasoconstricting, intraocular pressure-reducing activities.	CNCC(c1cc(c(cc1)O)O)O.Cl
L2300	810	-1.61744	FALSE	TRUE	TRUE	YM155	YM155 is a potent IAP (inhibitor of apoptosis proteins) inhibitor for survivin with IC50 of 0.54 nM.	C1(=CC=C2C(=C1)C(C3=C(C2=O)N(C(N3CC4=NC=CN=C4)C)CCOC)=O).[Br-]
TM-L4	767	-1.60883	FALSE	TRUE	TRUE	Ezetimibe	Ezetimibe is a Dietary Cholesterol Absorption Inhibitor. The physiologic effect of ezetimibe is by means of Decreased Cholesterol Absorption.	c1(ccc(cc1)[C@H](CC[C@H]1C(=O)N([C@@H]1c1ccc(cc1)O)c1ccc(cc1)F)O)F
LOPAC	582	-1.60737	FALSE	TRUE	TRUE	Methiothepin mesylate	5-HT1 Serotonin receptor antagonist; blocks serotonin autoreceptors	CS(O)(=O)=O.CSC1=CC2=C(SC3=C(CC2N2CCN(C)CC2)C=CC=C3)C=C1
L1200	864	-1.59508	FALSE	TRUE	TRUE	Brivanib Alaninate (BMS-582664)	Brivanib alaninate (BMS-582664) is the prodrug of BMS-540215, an ATP-competitive inhibitor against VEGFR2 with IC50 of 25 nM.	C12=C(C(=C(C=C1)OC3=NC=NN4C3=C(C(=C4)OC[C@@H](C)OC([C@@H](N)C)=O)C)F)C=C(N2)C
TM-L4	668	-1.56155	FALSE	TRUE	TRUE	Dibucaine hydrochloride	Dibucaine hydrochloride, a long-acting local amide anestheticsis, is usually used for surface anesthesia.	Cl.CCCCOc1nc2ccccc2c(c1)C(=O)NCCN(CC)CC
TM-L4	752	-1.55282	FALSE	TRUE	TRUE	Carvedilol phosphate	Carvedilol Phosphate is the phosphate salt form of carvedilol, a racemic mixture and adrenergic blocking agent with antihypertensive activity and devoid of intrinsic sympathomimetic activity.	O.OP(O)(O)=O.OP(O)(O)=O.COc1ccccc1OCCNCC(O)COc1cccc2[nH]c3ccccc3c12.COc1ccccc1OCCNCC(O)COc1cccc2[nH]c3ccccc3c12
14030	755	-1.55253	FALSE	TRUE	TRUE	BIFONAZOLE	antifungal, calmodulin antagonist	C1=CN(C=N1)C(C1=CC=CC=C1)C1=CC=C(C=C1)C1=CC=CC=C1
TM-L4	811	-1.55171	FALSE	TRUE	TRUE	Amiodarone hydrochloride	Amiodarone hydrochloride is an antianginal and class III antiarrhythmic drug. It increases the duration of ventricular and atrial muscle action by inhibiting POTASSIUM CHANNELS and VOLTAGE-GATED SODIUM CHANNELS. There is a resulting decrease in heart rate and in vascular resistance.	Cl.c1(c2c(oc1CCCC)cccc2)C(=O)c1cc(c(c(c1)I)OCCN(CC)CC)I
TM-L4	740	-1.5462	FALSE	TRUE	TRUE	Diethylstilbestrol	Diethylstilbestrol is used in the treatment of menopausal and postmenopausal disorders.	Oc1ccc(cc1)/C(=C(\CC)/c1ccc(O)cc1)/CC
LOPAC	828	-1.53542	FALSE	TRUE	TRUE	Forskolin	Activates adenylate cyclase; antihypertensive and vasodilator; isolated from Coleus forskohlii	CC(=O)OC1C(O)C2C(C)(C)CCC(O)C2(C)C2(O)C(=O)CC(C)(OC12C)C=C
TM-L4	869	-1.53348	FALSE	TRUE	TRUE	Butoconazole nitrate	Butoconazole Nitrate is the nitrate salt form of butoconazole, a synthetic imidazole derivative with fungistatic properties. Butoconazole nitrate interferes with steroid biosynthesis by inhibiting the conversion of lanosterol to ergosterol, thereby changing the fungal cell membrane lipid composition. This alters cell permeability and leads to growth inhibition. Butoconazole nitrate is active agai…	O[N+](=O)[O-].c1(SC(Cn2cncc2)CCc2ccc(Cl)cc2)c(Cl)cccc1Cl
14030	751	-1.51964	FALSE	TRUE	TRUE	RIMANTADINE HYDROCHLORIDE	antiviral	Cl.CC(N)C12CC3CC(CC(C3)C1)C2
L1200	777	-1.51465	FALSE	TRUE	TRUE	Neratinib (HKI-272)	Neratinib (HKI-272) is a highly selective HER2 and EGFR inhibitor with IC50 of 59 nM and 92 nM; weakly inhibits KDR and Src, no significant inhibition to Akt, CDK1/2/4, IKK-2, MK-2, PDK1, c-Raf and c-Met. Phase 3.	C1(=C(C=C2C(=C1)N=CC(=C2NC3=CC=C(C(=C3)Cl)OCC4=NC=CC=C4)C#N)NC(/C=C/CN(C)C)=O)OCC
TM-L4	783	-1.51363	FALSE	TRUE	TRUE	Dabigatran etexilate	Dabigatran is a thrombin inhibitor, which acts by binding and blocking thrombogenic activity and the prevention of thrombus formation.	CCCCCCOC(=O)NC(=N)c1ccc(NCc2nc3cc(ccc3n2C)C(=O)N(CCC(=O)OCC)c2ccccn2)cc1
LOPAC	727	-1.50367	FALSE	TRUE	TRUE	SQ 22536	Adenylyl cyclase inhibitor	NC1=NC=NC2=C1N=CN2C1CCCO1
14030	698	-1.50238	FALSE	TRUE	TRUE	CLEMASTINE FUMARATE	antihistaminic	OC(=O)\C=C\C(O)=O.CN1CCC[C@@H]1CCO[C@](C)(C1=CC=CC=C1)C1=CC=C(Cl)C=C1
LOPAC	804	-1.49084	FALSE	TRUE	TRUE	Furafylline	Cytochrome P4501A2 inhibitor	CN1C(=O)N(CC2=CC=CO2)C2=C(NC(C)=N2)C1=O
LOPAC	811	-1.4852	FALSE	TRUE	TRUE	(±)-Synephrine	alpha-Adrenoceptor agonist; vasoconstrictor	CNCC(O)C1=CC=C(O)C=C1
14030	494	-1.48325	FALSE	TRUE	TRUE	PENICILLIN V POTASSIUM	antibacterial	[K+].CC1(C)S[C@@H]2[C@H](NC(=O)COC3=CC=CC=C3)C(=O)N2[C@H]1C([O-])=O
L1900	726	-1.48238	FALSE	TRUE	TRUE	SHAM CONTROL	SHAM CONTROL	SHAM CONTROL
LOPAC	856	-1.47659	FALSE	TRUE	TRUE	GR 55562 dihydrobromide	Selective 5-HT1B/1D serotonin receptor antagonist.	Br.Br.CN(C)CCCC1=CC(=CC=C1O)C(=O)NC1=CC=C(C=C1)C1=CC=NC=C1
L1200	739	-1.46898	FALSE	TRUE	TRUE	Lenvatinib (E7080)	E7080 (Lenvatinib) is a multi-target inhibitor, mostly for VEGFR2(KDR)/VEGFR3(Flt-4) with IC50 of 4 nM/5.2 nM, less potent against VEGFR1/Flt-1, ~10-fold more selective for VEGFR2/3 against FGFR1, PDGFRα/β. Phase 3.	C1(=C(C=C2C(=C1)C(=CC=N2)OC3=CC(=C(C=C3)NC(=O)NC4CC4)Cl)OC)C(N)=O
14030	721	-1.46465	FALSE	TRUE	TRUE	ATROPINE OXIDE	anticholinergic	C[N]1(O)C2CCC1CC(C2)OC(=O)C(CO)C1=CC=CC=C1
14030	799	-1.45881	FALSE	TRUE	TRUE	2-THIOURACIL	antiviral, thyroid depressant	OC1=NC(S)=NC=C1
TM-L4	801	-1.45578	FALSE	TRUE	TRUE	Palbociclib Isethionate	Palbociclib (PD-0332991) is a selective inhibitor of CDK4/6 (IC50s: 11/16 nM). It exhibits no inhibition against a panel of 36 additional protein kinases.	OCCS(O)(=O)=O.CC(=O)c1c(C)c2cnc(Nc3ccc(cn3)N3CCNCC3)nc2n(C2CCCC2)c1=O
L2300	761	-1.4552	FALSE	TRUE	TRUE	SHAM CONTROL	SHAM CONTROL	SHAM CONTROL
L2300	796	-1.45427	FALSE	TRUE	TRUE	BIRB 796 (Doramapimod)	BIRB 796 (Doramapimod) is a highly selective p38α MAPK inhibitor with Kd of 0.1 nM.	C1=C(C2=C(C(=C1)OCCN3CCOCC3)C=CC=C2)NC(NC4=CC(=NN4C5=CC=C(C=C5)C)C(C)(C)C)=O
14030	653	-1.45001	FALSE	TRUE	TRUE	DROPERIDOL	neuroleptic	FC1=CC=C(C=C1)C(=O)CCCN1CCC(=CC1)N1C(=O)NC2=CC=CC=C12
L1200	832	-1.43552	FALSE	TRUE	TRUE	PF-573228	PF-573228 is an ATP-competitive inhibitor of FAK with IC50 of 4 nM, ~50- to 250-fold selective for FAK than Pyk2, CDK1/7 and GSK-3β.	N1C(CCC2C=C(C=CC1=2)NC3N=C(C(=CN=3)C(F)(F)F)NCC4C=C(C=CC=4)S(=O)(=O)C)=O
TM-L4	695	-1.43188	FALSE	TRUE	TRUE	Fluoxetine hydrochloride	Fluoxetine is the first highly specific serotonin uptake inhibitor. It is used as an antidepressant and often has a more acceptable side-effects profile than traditional antidepressants.	Cl.CNCCC(Oc1ccc(cc1)C(F)(F)F)c1ccccc1
L2300	875	-1.41188	FALSE	TRUE	TRUE	KU-55933	KU-55933 is a potent and specific ATM inhibitor with IC50 and Ki of 13 nM and 2.2 nM, respectively.	C1=CC=C2C(=C1)SC3=C(S2)C=CC=C3C4=CC(C=C(O4)N5CCOCC5)=O
LOPAC	741	-1.41137	FALSE	TRUE	TRUE	Capsazepine	Synthetic analog of capsaicin that acts as a specific vanilloid receptor antagonist	OC1=CC2=C(CN(CCC2)C(=S)NCCC2=CC=C(Cl)C=C2)C=C1O
14030	699	-1.40834	FALSE	TRUE	TRUE	EZETIMIBE	sterol absorption inhibitor	OC(CC[C@@H]1[C@H](N(C1=O)C1=CC=C(F)C=C1)C1=CC=C(O)C=C1)C1=CC=C(F)C=C1
TM-L4	654	-1.40343	FALSE	TRUE	TRUE	Fludrocortisone acetate	Fludrocortisone, a glucocorticoid-receptor agonist, binds to cytoplasmic receptors, translocates to the nucleus, and subsequently initiates the transcription of glucocorticoid-responsive genes such as lipocortins to inhibit phospholipase A2 (PLA2). Fludrocortisone Acetate is the acetate salt of a synthetic fluorinated corticosteroid with anti-inflammatory and antiallergic activities. Inhibition o…	[C@@H]12[C@@]([C@@]3(C(=CC(=O)CC3)CC2)C)([C@H](C[C@]2([C@H]1CC[C@@]2(C(=O)COC(=O)C)O)C)O)F
TM-L4	825	-1.40325	FALSE	TRUE	TRUE	Isoetharine mesylate salt	Isoetharine Mesylate Salt is a β-adrenergic receptor agonist. it also is pregnane X receptor (PXR) activator capable of upregulating CYP450 expression.	CS(O)(=O)=O.CCC(NC(C)C)C(O)c1ccc(O)c(O)c1
14030	690	-1.39879	FALSE	TRUE	TRUE	METHYLPREDNISOLONE	glucocorticoid	C[C@H]1CC2C3CC[C@](O)(C(=O)CO)[C@@]3(C)C[C@H](O)C2[C@@]2(C)C=CC(=O)C=C12
LOPAC	811	-1.39579	FALSE	TRUE	TRUE	(-)-alpha-Methylnorepinephrine	Active enantiomer; adrenoceptor agonist; vasoconstrictor; antihypertensive	CC(N)[C@H](O)C1=CC=C(O)C(O)=C1
14030	635	-1.38943	FALSE	TRUE	TRUE	HYDROCORTISONE ACETATE	glucocorticoid, antiinflammatory	CC(=O)OCC(=O)[C@@]1(O)CCC2C3CCC4=CC(=O)CC[C@]4(C)C3[C@@H](O)C[C@]12C
LOPAC	803	-1.38556	FALSE	TRUE	TRUE	PF-4708671	PF-4708671 is a selective p70 ribosomal S6 kinase (S6K1) inhibitor.	CCC1=CN=CN=C1N1CCN(CC2=NC3=CC(=CC=C3N2)C(F)(F)F)CC1
LOPAC	713	-1.38502	FALSE	TRUE	TRUE	P1,P4-Di(adenosine-5')tetraphosphate triammonium	Dinucleoside polyphosphate that competitively inhibits ADP-induced platelet aggregation	[NH4+].[NH4+].[NH4+].NC1=NC=NC2=C1N=CN2[C@H]1O[C@@H](COP(O)(=O)OP([O-])(=O)OP([O-])(=O)OP([O-])(=O)OC[C@H]2O[C@H](C(O)[C@H]2O)N2C=NC3=C2N=CN=C3N)[C@@H](O)C1O
TM-L4	840	-1.37948	FALSE	TRUE	TRUE	Dasabuvir	Dasabuvir is a non-nucleoside inhibitor of the hepatitis C virus (HCV) non-structural protein 5B (NS5B), an RNA-dependent RNA polymerase, with potential activity against HCV. Upon administration and after intracellular uptake, dasabuvir binds HCV NS5B polymerase and blocks viral RNA synthesis and replication. The HCV NS5B protein is essential for the replication of the HCV RNA genome.	CC(C)(C)c1c(c(cc(c1)n1ccc(=O)[nH]c1=O)c1cc2c(cc1)cc(cc2)NS(=O)(=O)C)OC
LOPAC	702	-1.36908	FALSE	TRUE	TRUE	R(-)-2,10,11-Trihydroxyaporphine hybrobromide	D2 dopamine receptor agonist	Br.CN1CCC2=CC(O)=CC3=C2[C@H]1CC1=C3C(O)=C(O)C=C1
14030	761	-1.36608	FALSE	TRUE	TRUE	STAVUDINE	antiviral	CC1=CN([C@@H]2O[C@H](CO)C=C2)C(=O)NC1=O
14030	810	-1.36287	FALSE	TRUE	TRUE	BUFEXAMAC	antiinflammatory, analgesic, antipyretic	CCCCOC1=CC=C(CC(=O)NO)C=C1
14030	920	-1.36187	FALSE	TRUE	TRUE	PHYSOSTIGMINE SALICYLATE	cholinergic, anticholinesterase, miotic	OC(=O)C1=C(O)C=CC=C1.CNC(=O)OC1=CC2=C(C=C1)N(C)[C@H]1N(C)CC[C@@]21C
14030	519	-1.36144	FALSE	TRUE	TRUE	OXIDOPAMINE HYDROCHLORIDE	adrenergic agonist (opthalmic)	Cl.NCCC1=C(O)C=C(O)C(O)=C1
L2300	850	-1.34958	FALSE	TRUE	TRUE	FR 180204		NC1=NNC2C(=CC(=NN=2)C3C(=NN4C=CC=CC4=3)C5C=CC=CC=5)1
L1200	812	-1.34937	FALSE	TRUE	TRUE	Butein	Butein, a plant polyphenol isolated from <i>Rhus verniciflua</i>, is able to inhibit the activation of protein tyrosine kinase, NF-κB and STAT3, also inhibits EGFR	C1(=C(C=C(C=C1)O)O)C(/C=C/C2=CC(=C(C=C2)O)O)=O
L2300	827	-1.34564	FALSE	TRUE	TRUE	CGS 9343B		C1(=O)(N(C2CCN(CC2)CC3(C4N(C5C=CC=CC=5CO3)C=CC=4)C)C6C=CC=CC(N1)=6).C(\C=C/C(=O)O)(=O)O
L1200	787	-1.34341	FALSE	TRUE	TRUE	TGX-221	TGX-221 is a p110β-specific inhibitor with IC50 of 5 nM, 1000-fold more selective for p110β than p110α.	C1=C(C=C(C2N1C(C=C(N=2)N3CCOCC3)=O)C(C)NC4=CC=CC=C4)C
14030	523	-1.34081	FALSE	TRUE	TRUE	DIETHYLCARBAMAZINE CITRATE	anthelmintic	OC(=O)CC(O)(CC(O)=O)C(O)=O.CCN(CC)C(=O)N1CCN(C)CC1
14030	514	-1.32952	FALSE	TRUE	TRUE	MEGESTROL ACETATE	progestogen, antineoplastic	CC(=O)O[C@@]1(CCC2C3C=C(C)C4=CC(=O)CCC4(C)C3CCC12C)C(C)=O
TM-L4	777	-1.32941	FALSE	TRUE	TRUE	Lovastatin	Lovastatin is an HMG-CoA Reductase Inhibitor, used for lowering cholesterol.	[C@H]1(C[C@H](CC(=O)O1)O)CC[C@@H]1[C@H]2[C@@H](OC(=O)[C@H](CC)C)C[C@H](C=C2C=C[C@@H]1C)C
14030	468	-1.32257	FALSE	TRUE	TRUE	HOMATROPINE METHYLBROMIDE	anticholinergic (opthalmic)	[Br-].C[N+]1(C)C2CC[C@H]1C[C@H](C2)OC(=O)C(O)C1=CC=CC=C1
TM-L4	771	-1.32135	FALSE	TRUE	TRUE	Ulipristal acetate	Ulipristal Acetate is an orally bioavailable, acetate salt of ulipristal, a selective progesterone receptor modulator with anti-progesterone activity. Ulipristal binds to the progesterone receptor (PR), thereby inhibiting PR-mediated gene expression, and interfering with progesterone activity in the reproductive system. As a result, this agent may suppress the growth of uterine leiomyomatosis. Fu…	C1(=O)CCC2=C3[C@@H](CCC2=C1)[C@@H]1CC[C@](C(=O)C)([C@@]1(C)C[C@@H]3c1ccc(cc1)N(C)C)OC(=O)C
LOPAC	776	-1.31857	FALSE	TRUE	TRUE	FPL 64176	Potent L-type Ca2+ channel activator	COC(=O)C1=C(C)NC(C)=C1C(=O)C1=C(CC2=CC=CC=C2)C=CC=C1
14030	588	-1.31563	FALSE	TRUE	TRUE	NAPROXEN(+)	antiinflammatory, analgesic, antipyretic	COC1=CC2=CC=C(C=C2C=C1)[C@H](C)C(O)=O
L1200	778	-1.312	FALSE	TRUE	TRUE	Triciribine	Triciribine is a DNA synthesis inhibitor, also inhibits Akt and HIV-1 with IC50 of 130 nM and 20 nM, respectively; does not inhibit PI3K/PDK1; 5000-fold less active in cells lacking adenosine kinase. Phase 1/2.	[C@H]1([C@@H]([C@H](O[C@@H]1N2C3=C4C(=C2)C(=NN(C4=NC=N3)C)N)CO)O)O
LOPAC	541	-1.30132	FALSE	TRUE	TRUE	Sertraline hydrochloride	Selective serotonin reuptake inhibitor; antidepressant	Cl.CN[C@H]1CC[C@@H](C2=CC=C(Cl)C(Cl)=C2)C2=CC=CC=C12
LOPAC	811	-1.29691	FALSE	TRUE	TRUE	PAPP	Selective 5-HT1A serotonin receptor agonist	NC1=CC=C(CCN2CCN(CC2)C2=CC=CC(=C2)C(F)(F)F)C=C1
L1900	720	-1.29562	FALSE	TRUE	TRUE	Danusertib (PHA-739358)	Danusertib (PHA-739358) is an Aurora kinase inhibitor for Aurora A/B/C with IC50 of 13 nM/79 nM/61 nM, modestly potent to Abl, TrkA, c-RET and FGFR1, and less potent to Lck, VEGFR2/3, c-Kit, CDK2, etc. Phase 2.	C1(=CC=CC=C1)[C@H](C(N2CC3=C(C2)C(=NN3)NC(=O)C4=CC=C(C=C4)N5CCN(CC5)C)=O)OC
LOPAC	709	-1.28801	FALSE	TRUE	TRUE	Hexahydro-sila-difenidol hydrochloride, p-fluoro analog	High affinity muscarinic acetylcholine receptor antagonist, but displays altered selectivity (M3 > M1 > M2)	Cl.O[Si](CCCN1CCCCC1)(C1CCCCC1)C1=CC=C(F)C=C1
L2300	730	-1.28656	FALSE	TRUE	TRUE	SHAM CONTROL	SHAM CONTROL	SHAM CONTROL
L1200	655	-1.28545	FALSE	TRUE	TRUE	CEP-33779	CEP33779 is a selective JAK2 inhibitor with IC50 of 1.8 nM, >40- and >800-fold versus JAK1 and TYK2.	C1(=CC=CC(=C1)NC2N=C3N(N=2)C=CC=C3C4=CC=C(C=C4)S(=O)(C)=O)N5CCN(CC5)C
14030	856	-1.28434	FALSE	TRUE	TRUE	ROTENONIC ACID, METHYL ETHER		COC1=CC2=C(C=C1OC)[C@H]1[C@@H](CO2)OC2=C(C=CC(OC)=C2CC=C(C)C)C1=O
L1200	683	-1.28305	FALSE	TRUE	TRUE	WP1066	WP1066 is a novel inhibitor of JAK2 and STAT3 with IC50 of 2.30 μM and 2.43 μM in HEL cells; shows activity to JAK2, STAT3, STAT5, and ERK1/2 not JAK1 and JAK3.	C(/C(=C/C1C=CC=C(N=1)Br)C#N)(=O)N[C@@H](C)C2C=CC=CC=2
L1200	796	-1.27339	FALSE	TRUE	TRUE	GSK461364	GSK461364 inhibits purified Plk1 with Ki of 2.2 nM. It is more than 1000-fold selective against Plk2/3. Phase 1.	C1N(CCN(C1)CC2=CC3=C(C=C2)N=CN3C4=CC(=C(S4)C(=O)N)O[C@H](C)C5=CC=CC=C5C(F)(F)F)C
L1200	820	-1.25806	FALSE	TRUE	TRUE	GDC-0879	GDC-0879 is a novel, potent, and selective B-Raf inhibitor with IC50 of 0.13 nM with activity against c-Raf as well; no inhibition known to other protein kinases.	C(CN1N=C(C(=C1)C2=CC=C3C(=C2)CCC/3=N/O)C4C=CN=CC=4)O
14030	488	-1.25568	FALSE	TRUE	TRUE	LACTULOSE	laxative	OC[C@H]1O[C@](O)(CO)[C@@H](O)[C@@H]1O[C@@H]1O[C@H](CO)[C@H](O)[C@H](O)[C@H]1O
pfizer	646	-1.25296	FALSE	TRUE	TRUE	Axitinib	Tyrosine Kinase	CNC(=O)C1=CC=CC=C1SC1=CC2=C(C=C1)C(\C=C\C1=NC=CC=C1)=NN2
L1200	879	-1.25269	FALSE	TRUE	TRUE	Roscovitine (Seliciclib,CYC202)	Roscovitine (Seliciclib, CYC202) is a potent and selective CDK inhibitor for Cdc2, CDK2 and CDK5 with IC50 of 0.65 μM, 0.7 μM and 0.16 μM. It shows little effect on CDK4/6. Phase 2.	N1=C2C(=C(N=C1N[C@@H](CO)CC)NCC3=CC=CC=C3)N=CN2C(C)C
L2300	805	-1.2512	FALSE	TRUE	TRUE	CCT 018159		C1(C(C2C=C(C(=CC=2O)O)CC)=NNC=1C)C3C=C4C(=CC=3)OCCO4
L2300	703	-1.24037	FALSE	TRUE	TRUE	LY2603618 (IC-83)	LY2603618 (IC-83) is a selective Chk1 inhibitor with potential anti-tumor activity.	C1=C(C(=CC(=C1OC[C@@H]2CNCCO2)NC(NC3=CN=C(C=N3)C)=O)Br)C
14030	801	-1.23854	FALSE	TRUE	TRUE	ETHYLNOREPINEPHRINE HYDROCHLORIDE	bronchodilator	Cl.CCC(N)C(O)C1=CC(O)=C(O)C=C1
L1900	734	-1.22992	FALSE	TRUE	TRUE	Azacitidine	Azacitidine is a nucleoside analogue of cytidine that specifically inhibits DNA methylation by trapping DNA methyltransferases.	[C@H]1([C@H](O[C@H]([C@H]1O)N2C(N=C(N=C2)N)=O)CO)O
TM-L4	702	-1.22934	FALSE	TRUE	TRUE	Nortriptyline hydrochloride	Nortriptyline hydrochloride is a metabolite of AMITRIPTYLINE that is also used as an antidepressive agent. Nortriptyline is used in major depression, dysthymia, and atypical depressions.	Cl.CNCC\C=C1\c2ccccc2CCc2ccccc12
L2300	509	-1.22932	FALSE	TRUE	TRUE	ABT-751(Colchicine)	ABT-751 (E7010) binds to the colchicine site on β-tubulin and inhibits polymerization of microtubules.	C1=C(C=CC(=C1)S(=O)(=O)NC2=C(N=CC=C2)NC3=CC=C(C=C3)O)OC
L2300	775	-1.22695	FALSE	TRUE	TRUE	BIBR 1532		C1C=C(C(=CC=1)NC(=O)/C=C(/C2=CC=C3C(=C2)C=CC=C3)C)C(O)=O
14030	727	-1.2256	FALSE	TRUE	TRUE	PENTETIC ACID	chelating agent, diagnostic aid	OC(=O)CN(CCN(CC(O)=O)CC(O)=O)CCN(CC(O)=O)CC(O)=O
LOPAC	816	-1.22102	FALSE	TRUE	TRUE	Pergolide methanesulfonate	Dopamine receptor agonist; antiparkinsonian	CS(O)(=O)=O.CCCN1C[C@H](CSC)C[C@H]2[C@H]1CC1=CNC3=CC=CC2=C13
14030	752	-1.22026	FALSE	TRUE	TRUE	VIGABATRIN	anticonvulsant	NCCO.NC(CCC(O)=O)C=C
LOPAC	744	-1.21884	FALSE	TRUE	TRUE	Pramipexole dihydrochloride	Pramipexole is a dopamine agonist active at D3 and D2 receptor subtypes	Cl.Cl.CCCN[C@H]1CCC2=C(C1)SC(N)=N2
TM-L4	746	-1.20748	FALSE	TRUE	TRUE	Dacomitinib	Dacomitinib(PF299804; PF-00299804) is a highly selective, orally bioavailable small-molecule inhibitor of the HER family of tyrosine kinases with IC50 of 6, 45.7 and 73.7 nM for EGFR, ERBB2, and ERBB4, respectively.	O=C(Nc1cc2c(Nc3ccc(F)c(Cl)c3)ncnc2cc1OC)/C=C/CN1CCCCC1
LOPAC	732	-1.19354	FALSE	TRUE	TRUE	Phenelzine sulfate	Non-selective MAO-A/B inhibitor	OS(O)(=O)=O.NNCCC1=CC=CC=C1
L1200	782	-1.19206	FALSE	TRUE	TRUE	Tyrphostin AG 1296	Tyrphostin AG 1296 is an inhibitor of PDGFR with IC50 of 0.3-0.5 μM, no activity to EGFR.	N1C(=CN=C2C=C(C(=CC=12)OC)OC)C3C=CC=CC=3
L1200	810	-1.19073	FALSE	TRUE	TRUE	Dacomitinib (PF299804, PF299)	PF-299804 is a potent, irreversible pan-ErbB inhibitor, mostly to EGFR with IC50 of 6 nM, effective against NSCLCs with EGFR or ERBB2 mutations (resistant to gefitinib) as well as those harboring the EGFR T790M mutation. Phase 2.	C(/C=C/C(NC1=C(C=C2C(=C1)C(=NC=N2)NC3=CC(=C(C=C3)F)Cl)OC)=O)N4CCCCC4
TM-L4	568	-1.18388	FALSE	TRUE	TRUE	Rosuvastatin	Rosuvastatin is an antilipemic agent that competitively inhibits hydroxymethyl-glutaryl-coenzyme A (HMG-CoA) reductase. HMG-CoA reductase catalyzes the conversion of HMG-CoA to mevalonic acid, the rate-limiting step in cholesterol biosynthesis. Rosuvastatin belongs to a class of medications called statins and is used to reduce plasma cholesterol levels and prevent cardiovascular disease.	CC(C)c1nc(nc(-c2ccc(F)cc2)c1\C=C\[C@@H](O)C[C@@H](O)CC(O)=O)N(C)S(C)(=O)=O
TM-L4	822	-1.18199	FALSE	TRUE	TRUE	Betrixaban hydrochloride(330942-05-7(free base))	Betrixaban is a potent, selective, and orally efficacious factor Xa (fXa) inhibitor (IC50: 1.5 nM).	Cl.COc1ccc(NC(=O)c2ccc(cc2)C(=N)N(C)C)c(c1)C(=O)Nc1ccc(Cl)cn1
L1200	716	-1.16954	FALSE	TRUE	TRUE	CO-1686 (AVL-301)	CO-1686 is an irreversible, mutant-selective EGFR inhibitor with Ki of 21.5 nM and 303.3 nM for EGFRL858R/T790M and EGFRWT, respectively. Phase 1/2.	C1(=CN=C(N=C1NC2=CC=CC(=C2)NC(=O)C=C)NC3=C(C=C(C=C3)N4CCN(CC4)C(C)=O)OC)C(F)(F)F
14030	742	-1.16626	FALSE	TRUE	TRUE	GLYBURIDE	antihyperglycemic	COC1=C(C=C(Cl)C=C1)C(=O)NCCC1=CC=C(C=C1)S(=O)(=O)NC(=O)NC1CCCCC1
TM-L4	832	-1.16352	FALSE	TRUE	TRUE	Betrixaban maleate	Betrixaban is a non-vitamin K oral anticoagulant whose action is driven by the competitive and reversible inhibition of the factor Xa [1]. It was selected among all lead compounds due to its low hERG channel affinity while sustaining its factor Xa inhibition capacity [3]. Betrixaban, now developed by Portola Pharmaceuticals Inc., is prescribed as a venous thromboembolism (VTE) prophylactic for ad…	OC(=O)\C=C/C(O)=O.COc1ccc(NC(=O)c2ccc(cc2)C(=N)N(C)C)c(c1)C(=O)Nc1ccc(Cl)cn1
14030	688	-1.1627	FALSE	TRUE	TRUE	ETICLOPRIDE HYDROCHLORIDE	dopamine D2 blocker	Cl.CCN1CCCC1CNC(=O)C1=C(OC)C(Cl)=CC(CC)=C1O
14030	642	-1.15824	FALSE	TRUE	TRUE	DIHYDROERGOTAMINE MESYLATE	vasoconstrictor, antimigraine	CS(O)(=O)=O.CN1C[C@@H](C[C@H]2[C@H]1CC1=CNC3=CC=CC2=C13)C(=O)N[C@]1(C)O[C@@]2(O)[C@@H]3CCCN3C(=O)[C@H](CC3=CC=CC=C3)N2C1=O
14030	826	-1.15161	FALSE	TRUE	TRUE	TENATOPRAZOLE	anti-ulcer, proton pump inhibitor	COC1=CC=C2NC(=NC2=N1)S(=O)CC1=NC=C(C)C(OC)=C1C
14030	784	-1.14638	FALSE	TRUE	TRUE	PROCHLORPERAZINE EDISYLATE	antiemetic, antipsychotic, treatment of vertigo	OS(=O)(=O)CCS(O)(=O)=O.CN1CCN(CCCN2C3=C(SC4=C2C=C(Cl)C=C4)C=CC=C3)CC1
TM-L4	852	-1.14437	FALSE	TRUE	TRUE	Escitalopram Oxalate	Escitalopram Oxalate is a selective serotonin (5-HT) reuptake inhibitor (SSRI) with Ki of 0.89 nM.	OC(=O)C(O)=O.CN(C)CCC[C@]1(OCc2cc(ccc12)C#N)c1ccc(F)cc1
TM-L4	843	-1.13616	FALSE	TRUE	TRUE	Cabazitaxel	Cabazitaxel is a taxane and antineoplastic agent which is currently used in the therapy of castration-resistant metastatic prostate cancer after failure of docetaxel.	O([C@]12[C@@H]3[C@@]([C@@H](OC)C[C@H]1OC2)(C(=O)[C@H](OC)C1=C([C@@H](OC(=O)[C@H](O)[C@@H](NC(=O)OC(C)(C)C)c2ccccc2)C[C@@](O)([C@H]3OC(=O)c2ccccc2)C1(C)C)C)C)C(=O)C
LOPAC	751	-1.13602	FALSE	TRUE	TRUE	Eletriptan hydrobromide	Eletriptan hydrobromide is a serotonin 5-HT1B/1D receptor agonist; second generation anti-migraine drug.	Br.CN1CCC[C@@H]1CC1=CNC2=CC=C(CCS(=O)(=O)C3=CC=CC=C3)C=C12
LOPAC	721	-1.13567	FALSE	TRUE	TRUE	CPNQ	Prevents huntingtin-mediated proteosome dysfunction and reduces alpha-synuclein-mediated toxicity; promotes inclusion formation in cellular models of Huntington's and Parkinson's disease.	[O-][N+](=O)C1=CC=C(N2CCN(CC2)C(=O)C2=CC=C(Cl)C=C2)C2=C1N=CC=C2
LOPAC	682	-1.13491	FALSE	TRUE	TRUE	Phenserine	Selective, non-competitive acetylcholinesterase (AChE) inhibitor.	CN1CC[C@]2(C)[C@H]1N(C)C1=CC=C(OC(=O)NC3=CC=CC=C3)C=C21
L1200	789	-1.13306	FALSE	TRUE	TRUE	PQ 401	PQ401 inhibits autophosphorylation of IGF-1R domain with IC50 of <1 μM.	N(C(=O)NC1C=C(N=C2C=CC=CC=12)C)C3=C(C=CC(=C3)Cl)OC
14030	850	-1.11847	FALSE	TRUE	TRUE	3-HYDROXYTYRAMINE	dopaminergic	NCCC1=CC(O)=C(O)C=C1
14030	894	-1.11751	FALSE	TRUE	TRUE	CLEMASTINE FUMARATE	antihistaminic	OC(=O)\C=C\C(O)=O.CN1CCC[C@@H]1CCO[C@](C)(C1=CC=CC=C1)C1=CC=C(Cl)C=C1
14030	833	-1.11136	FALSE	TRUE	TRUE	ZOXAZOLAMINE	muscle relaxant, antirrheumatic	NC1=NC2=CC(Cl)=CC=C2O1
14030	584	-1.11039	FALSE	TRUE	TRUE	LINCOMYCIN HYDROCHLORIDE	antibacterial	Cl.CCC[C@@H]1C[C@H](N(C)C1)C(=O)N[C@@H]([C@H](C)O)[C@H]1O[C@H](SC)[C@H](O)[C@@H](O)[C@H]1O
14030	518	-1.10889	FALSE	TRUE	TRUE	PROCAINE HYDROCHLORIDE	anesthetic (local)	Cl.CCN(CC)CCOC(=O)C1=CC=C(N)C=C1
LOPAC	773	-1.10116	FALSE	TRUE	TRUE	Dobutamine hydrochloride	beta1 Adrenoceptor agonist	Cl.CC(CCC1=CC=C(O)C=C1)NCCC1=CC=C(O)C(O)=C1
L1900	812	-1.09854	FALSE	TRUE	TRUE	SHAM CONTROL	SHAM CONTROL	SHAM CONTROL
LOPAC	592	-1.0929	FALSE	TRUE	TRUE	Emetine dihydrochloride hydrate	Apoptosis inducer; RNA-Protein translation inhibitor	Cl.Cl.CC[C@H]1CN2CCC3=C(C=C(OC)C(OC)=C3)[C@@H]2C[C@@H]1C[C@H]1NCCC2=CC(OC)=C(OC)C=C12
14030	862	-1.08738	FALSE	TRUE	TRUE	TULOBUTEROL HYDROCHLORIDE	bronchodilator, beta adrenergic agonist	Cl.CC(C)(C)NCC(O)C1=C(Cl)C=CC=C1
LOPAC	728	-1.0858	FALSE	TRUE	TRUE	CP-91149	CP-91149 is a selective glycogen phosphorylase inhibitor.	CN(C)C(=O)[C@H](O)[C@H](CC1=CC=CC=C1)NC(=O)C1=CC2=CC(Cl)=CC=C2N1
14030	853	-1.07203	FALSE	TRUE	TRUE	TIRATRICOL	thyroid agent	OC(=O)CC1=CC(I)=C(OC2=CC(I)=C(O)C=C2)C(I)=C1
TM-L4	775	-1.07094	FALSE	TRUE	TRUE	Triclabendazole	Triclabendazole has been used in trials studying Parasitic Disease.	CSc1nc2cc(Oc3c(Cl)c(Cl)ccc3)c(Cl)cc2[nH]1
LOPAC	751	-1.06829	FALSE	TRUE	TRUE	(±)-Taxifolin	Flavonoid, antioxidant	OC1C(OC2=CC(O)=CC(O)=C2C1=O)C1=CC=C(O)C(O)=C1
14030	858	-1.05958	FALSE	TRUE	TRUE	DIPYROCETYL	antirheumatic, analgesic	CC(=O)OC1=CC=CC(C(O)=O)=C1OC(C)=O
14030	800	-1.05838	FALSE	TRUE	TRUE	CHOLIC ACID, METHYL ESTER		COC(=O)CCC(C)[C@H]1CCC2C3[C@H](O)C[C@@H]4C[C@H](O)CC[C@]4(C)C3C[C@H](O)[C@]12C
14030	719	-1.04877	FALSE	TRUE	TRUE	OLANZAPINE	antipsychotic	CN1CCN(CC1)C1=NC2=CC=CC=C2NC2=C1C=C(C)S2
14030	773	-1.04842	FALSE	TRUE	TRUE	3,6-DIMETHOXYFLAVONE		COC1=CC=C2OC(=C(OC)C(=O)C2=C1)C1=CC=CC=C1
TM-L4	672	-1.038	FALSE	TRUE	TRUE	Miltefosine	Miltefosine is the treatment of visceral and cutaneous leishmaniasis drug , and is proceeding clinical trials for this in several countries. Several medical agents produce some potency against visceral or cutaneous leishmaniasis, however a 2005 survey concluded that miltefosine is the only effective oral treatment for both forms of leishmaniasis.	CCCCCCCCCCCCCCCCOP(=O)([O-])OCC[N+](C)(C)C
L1200	793	-1.03704	FALSE	TRUE	TRUE	IPI-145 (INK1197)	IPI-145 (INK1197) is a novel and selective PI3K δ/γ inhibitor with Ki and IC50 of 23 pM/243 pM and 1 nM/50 nM, highly selective for PI3K δ/γ than other protein kinases. Phase 2.	C1=CC=C2C(=C1Cl)C(N(C(=C2)[C@H](C)NC3=NC=NC4=C3N=CN4)C5=CC=CC=C5)=O
LOPAC	758	-1.0225	FALSE	TRUE	TRUE	SCH 58261	A2A adenosine receptor antagonist.	NC1=NC2=C(C=NN2CCC2=CC=CC=C2)C2=NC(=NN12)C1=CC=CO1
TM-L4	801	-1.01993	FALSE	TRUE	TRUE	Calcitriol	Calcitriol is the physiologically active form of vitamin D. It is formed primarily in the kidney by enzymatic hydroxylation of 25-hydroxycholecalciferol (CALCIFEDIOL). Its production is stimulated by low blood calcium levels and parathyroid hormone. Calcitriol increases intestinal absorption of calcium and phosphorus, and in concert with parathyroid hormone increases bone resorption.	OC(C)(C)CCC[C@@H](C)[C@@H]1[C@@]2(C)CCC/C(=C\C=C/3\C[C@@H](O)C[C@H](O)C3=C)/[C@@H]2CC1
LOPAC	830	-1.01908	FALSE	TRUE	TRUE	BAY 61-3606 hydrochloride hydrate	Spleen tyrosine kinase (Syk) inhibitor; anti-inflammatory	Cl.COC1=CC=C(C=C1OC)C1=CC2=NC=C(C)N2C(NC2=NC=CC=C2C(N)=O)=N1
LOPAC	832	-1.01673	FALSE	TRUE	TRUE	Palmitoyl-DL-Carnitine chloride	Long-chain acylcarnitine; modulator of PKC activation; intermediate in mitochondrial fatty acid oxidation	[Cl-].CCCCCCCCCCCCCCCC(=O)OC(CC(O)=O)C[N+](C)(C)C
TM-L4	811	-1.01585	FALSE	TRUE	TRUE	Medrysone	Medrysone is a topical, synthetic glucocorticoid with metabolic, anti-inflammatory and anti-allergic properties. Medrysone exerts its effect by interacting with specific intracellular glucocorticoid receptors and subsequently binds to DNA to modify gene expression. This results in an induction of the synthesis of certain anti-inflammatory proteins while inhibiting the synthesis of certain inflamm…	[C@H]12[C@H]([C@H]3[C@](C[C@@H]2O)([C@H](CC3)C(=O)C)C)C[C@@H](C2=CC(=O)CC[C@]12C)C
LOPAC	764	-1.01156	FALSE	TRUE	TRUE	Pirenzepine dihydrochloride	Selective M1 muscarinic acetylcholine receptor antagonist	Cl.Cl.CN1CCN(CC(=O)N2C3=C(C=CC=C3)C(=O)NC3=C2N=CC=C3)CC1
L2300	673	-1.00492	FALSE	TRUE	TRUE	Ruxolitinib (INCB018424)	INCB018424 is a JAK family inhibitor for JAK1, JAK2 and JAK3 with IC50 of 2.7 nM, 4.5 nM and 322 nM, respectively.	N1=CN=C2C(=C1C3=CN(N=C3)[C@@H](CC#N)C4CCCC4)C=CN2
14030	674	-0.991686	FALSE	TRUE	TRUE	TRIAMCINOLONE ACETONIDE	antiinflammatory	CC1(C)O[C@@H]2CC3C4CCC5=CC(=O)C=C[C@]5(C)[C@@]4(F)[C@@H](O)C[C@]3(C)[C@@]2(O1)C(=O)CO
L1200	823	-0.983178	FALSE	TRUE	TRUE	CCT128930	CCT128930 is a potent, ATP-competitive and selective inhibitor of Akt2 with IC50 of 6 nM, 28-fold greater selectivity for Akt2 than the closely related PKA kinase.	N1=CN=C2C(=C1N3CCC(CC3)(N)CC4=CC=C(C=C4)Cl)C=CN2
TM-L4	782	-0.974505	FALSE	TRUE	TRUE	Epinephrine bitartrate	L-Epinephrine Bitartrate is alpha- and beta-adrenergic receptor stimulator.	O[C@H]([C@@H](O)C(O)=O)C(O)=O.CNC[C@H](O)c1ccc(O)c(O)c1
14030	742	-0.974429	FALSE	TRUE	TRUE	MENADIONE	prothrombogenic agent	CC1=CC(=O)C2=CC=CC=C2C1=O
pfizer	649	-0.971221	FALSE	TRUE	TRUE	Nafoxidine	Gene Regulation	Cl.COC1=CC2=C(C=C1)C(C1=CC=C(OCCN3CCCC3)C=C1)=C(CC2)C1=CC=CC=C1
TM-L4	787	-0.968301	FALSE	TRUE	TRUE	Brexpiprazole	Brexpiprazole is a partial agonist of human 5-hydroxytryptamine (5-HT) 5-HT1A and dopamine D2 receptors.	O=c1ccc2ccc(OCCCCN3CCN(CC3)c3cccc4sccc34)cc2[nH]1
L1900	748	-0.963863	FALSE	TRUE	TRUE	CI994 (Tacedinaline)	CI-994 (Tacedinaline) is an anti-cancer drug which inhibits HDAC1 with IC50 of 0.57 μM and causes G1 cell cycle arrest. Phase 3.	C1(=CC=C(C=C1)C(=O)NC2=C(C=CC=C2)N)NC(C)=O
LOPAC	831	-0.958678	FALSE	TRUE	TRUE	Fenoterol hydrobromide	Beta2-adrenoceptor agonist; bronchodilator	Br.CC(CC1=CC=C(O)C=C1)NCC(O)C1=CC(O)=CC(O)=C1
14030	614	-0.958051	FALSE	TRUE	TRUE	CAMPHOR (1R)	analgesic, antiinfective, antipruritic	CC1(C)[C@@H]2CC[C@]1(C)C(=O)C2
14030	839	-0.956283	FALSE	TRUE	TRUE	ARTENIMOL	antimalarial, antiinflammatory	C[C@@H]1CC[C@H]2[C@@H](C)C(O)O[C@@H]3O[C@]4(C)CC[C@@H]1[C@@]23OO4
LOPAC	702	-0.948799	FALSE	TRUE	TRUE	Triflupromazine hydrochloride	D2 dopamine receptor antagonist; phenothiazine antipsychotic	Cl.CN(C)CCCN1C2=CC=CC=C2SC2=C1C=C(C=C2)C(F)(F)F
14030	782	-0.927994	FALSE	TRUE	TRUE	EPHEDRINE (1R,2S) HYDROCHLORIDE	bronchodilator, cardiac stimulant	Cl.CNC(C)[C@H](O)C1=CC=CC=C1
14030	702	-0.921859	FALSE	TRUE	TRUE	FENOPROFEN	antiinflammatory	CC(C(O)=O)C1=CC(OC2=CC=CC=C2)=CC=C1
L1900	782	-0.92146	FALSE	TRUE	TRUE	AZD2461	AZD2461 is a novel PARP inhibitor with low affinity for Pgp than Olaparib. Phase 1.	C1=CC=C2C(=C1)C(NN=C2CC3=CC=C(C(=C3)C(N4CCC(CC4)OC)=O)F)=O
LOPAC	847	-0.920261	FALSE	TRUE	TRUE	2-Phenylaminoadenosine	Selective A2 adenosine receptor agonist; potent vasodilator; weak inhibitor of adenosine uptake by rat cerebral cortical synaptosomes	NC1=NC(NC2=CC=CC=C2)=NC2=C1N=CN2[C@@H]1O[C@H](CO)[C@H](O)C1O
14030	646	-0.917234	FALSE	TRUE	TRUE	PREDNISOLONE ACETATE	glucocorticoid	CC(=O)OCC(=O)[C@@]1(O)CCC2C3CCC4=CC(=O)C=CC4(C)C3[C@@H](O)C[C@]12C
14030	837	-0.916482	FALSE	TRUE	TRUE	TELENZEPINE HYDROCHLORIDE	antiulcer, M1 muscarinic antagonist	Cl.CN1CCN(CC(=O)N2C3=C(C)SC=C3C(=O)NC3=CC=CC=C23)CC1
LOPAC	746	-0.914268	FALSE	TRUE	TRUE	Lumefantrine	Lumefantrine is is an antimalarial for the treatment of multi-drug resistant strains of falciparum malaria.	CCCCN(CCCC)CC(O)C1=CC(Cl)=CC2=C1C1=C(C=C(Cl)C=C1)\C2=C\C1=CC=C(Cl)C=C1
14030	493	-0.907312	FALSE	TRUE	TRUE	BETHANECHOL CHLORIDE	cholinergic	[Cl-].CC(C[N+](C)(C)C)OC(N)=O
LOPAC	803	-0.901166	FALSE	TRUE	TRUE	PF 3845 hydrate	PF 3845 is a potent, irreversible inhibitor of fatty acid amide hydrolase (FAAH),	FC(F)(F)C1=CN=C(OC2=CC(CC3CCN(CC3)C(=O)NC3=CN=CC=C3)=CC=C2)C=C1
14030	626	-0.900865	FALSE	TRUE	TRUE	NADIDE	alcohol and narcotic antagonist	NC(=O)C1=C[N+](=CC=C1)[C@@H]1O[C@H](COP([O-])(=O)OP(O)(=O)OC[C@H]2O[C@H]([C@H](O)[C@@H]2O)N2C=NC3=C2N=CN=C3N)[C@@H](O)[C@H]1O
L2300	646	-0.900085	FALSE	TRUE	TRUE	Vinorelbine (Navelbine)	Vinorelbine (Navelbine) is an anti-mitotic agent which inhibits the proliferation of Hela cells with IC50 of 1.25 nM.	C1(=C(C=C2C(=C1)[C@]34[C@@](N2C)([C@]([C@@H]([C@]5([C@]3(N(CC=C5)CC4)[H])CC)OC(C)=O)(C(OC)=O)O)[H])OC)[C@]6(C[C@@]7(C=C(C[N@@](C7)CC8=C6NC9=C8C=CC=C9)CC)[H])C(OC)=O
TM-L4	764	-0.899729	FALSE	TRUE	TRUE	Formoterol	Arformoterol is an adrenergic β-2 receptor agonist with a prolonged duration of action. It is used to manage asthma and in the treatment of chronic obstructive pulmonary disease.	Oc1c(NC=O)cc([C@@H](O)CN[C@@H](Cc2ccc(OC)cc2)C)cc1
14030	713	-0.899168	FALSE	TRUE	TRUE	MECLIZINE HYDROCHLORIDE	antiemetic	Cl.Cl.CC1=CC(CN2CCN(CC2)C(C2=CC=CC=C2)C2=CC=C(Cl)C=C2)=CC=C1
14030	557	-0.890671	FALSE	TRUE	TRUE	POLYMYXIN B SULFATE	antibacterial	OS(O)(=O)=O.CCC(C)CCCCC(=O)NC(CCN)C(=O)NC(C(C)O)C(=O)NC(CCN)C(=O)NC1CCNC(=O)C(NC(=O)C(CCN)NC(=O)C(CCN)NC(=O)C(CC(C)C)NC(=O)C(CC2=CC=CC=C2)NC(=O)C(CCN)NC1=O)C(C)O
14030	818	-0.886168	FALSE	TRUE	TRUE	TIOCONAZOLE	antifungal	ClC1=C(COC(CN2C=CN=C2)C2=CC=C(Cl)C=C2Cl)C=CS1
14030	774	-0.881201	FALSE	TRUE	TRUE	DOPAMINE HYDROCHLORIDE	cardiotonic, antihypotensive	Cl.NCCC1=CC=C(O)C(O)=C1
L1900	912	-0.868763	FALSE	TRUE	TRUE	Valproic acid sodium salt (Sodium valproate)	Valproic acid sodium salt (Sodium valproate) is a HDAC inhibitor with IC50 of 0.4 mM and also inhibits GABA-transaminase or succinic semialdehyde dehydrogenase.	CCCC(C([O-])=O)CCC.[Na+]
LOPAC	720	-0.862876	FALSE	TRUE	TRUE	A3 hydrochloride	Non-selective casein kinase (CK) inhibitor.	Cl.NCCNS(=O)(=O)C1=CC=CC2=C(Cl)C=CC=C12
L1200	852	-0.861351	FALSE	TRUE	TRUE	GDC-0068	GDC-0068 is a highly selective pan-Akt inhibitor targeting Akt1/2/3 with IC50 of 5 nM/18 nM/8 nM, 620-fold selectivity over PKA. Phase 2.	C1CN(CCN1C([C@@H](C2=CC=C(C=C2)Cl)CNC(C)C)=O)C3=C4C(=NC=N3)[C@H](C[C@H]4C)O
TM-L4	747	-0.860442	FALSE	TRUE	TRUE	Succimer	Succimer is a Lead Chelator. The mechanism of action of succimer is as a Lead Chelating Activity.	[C@@H]([C@@H](C(=O)O)S)(C(=O)O)S
14030	762	-0.857505	FALSE	TRUE	TRUE	FOSFOMYCIN CALCIUM	antibacterial	[Ca++].CC1OC1P([O-])([O-])=O
14030	939	-0.845302	FALSE	TRUE	TRUE	METHOXSALEN	antipsoriatic, pigmentation agent	COC1=C2OC=CC2=CC2=C1OC(=O)C=C2
TM-L4	707	-0.837842	FALSE	TRUE	TRUE	Paclitaxel	Paclitaxel is a cyclodecane isolated from the bark of the Pacific yew tree. It stabilizes microtubules in their polymerized form leading to cell death.	CC(=O)O[C@@H]1C2=C(C)[C@H](C[C@@](O)([C@@H](OC(=O)c3ccccc3)[C@@H]3[C@@]4(CO[C@@H]4C[C@H](O)[C@@]3(C)C1=O)OC(C)=O)C2(C)C)OC(=O)[C@H](O)[C@@H](NC(=O)c1ccccc1)c1ccccc1
L1200	793	-0.833225	FALSE	TRUE	TRUE	LY294002	LY294002 is the first synthetic molecule known to inhibit PI3Kα/δ/β with IC50 of 0.5 μM/0.57 μM/0.97 μM, respectively; more stable in solution than Wortmannin, and also blocks autophagosome formation.	C1=CC(=C2C(=C1)C(C=C(O2)N3CCOCC3)=O)C4=CC=CC=C4
LOPAC	767	-0.827689	FALSE	TRUE	TRUE	SC-51322	SC-51322 is a selective prostglandin E2 (EP1) receptor antagonist	ClC1=CC2=C(OC3=CC=CC=C3CN2C(=O)NNC(=O)CCSCC2=CC=CO2)C=C1
14030	790	-0.822925	FALSE	TRUE	TRUE	SULBENTINE	antifungal	O=C1SCN(CC2=CC=CC=C2)CN1CC1=CC=CC=C1
14030	676	-0.82096	FALSE	TRUE	TRUE	SEMUSTINE	antineoplastic	CC1CCC(CC1)NC(=O)N(CCCl)N=O
TM-L4	824	-0.819318	FALSE	TRUE	TRUE	Noradrenaline bitartrate	Norepinephrine bitartrate acts directly on the α- and β-adrenergic receptors. Norepinephrine Bitartrate is a bitartrate salt of norepinephrine, a synthetic phenylethylamine that mimics the sympathomimetic actions of the endogenous norepinephrine. Clinically, norepinephrine is used as a peripheral vasoconstrictor that causes constriction of arterial and venous beds via its alpha-adrenergic action.…	O.OC(C(O)C(O)=O)C(O)=O.NC[C@H](O)c1ccc(O)c(O)c1
L1200	707	-0.814916	FALSE	TRUE	TRUE	Gefitinib (ZD1839)	Gefitinib (ZD-1839) is an EGFR inhibitor for Tyr1173, Tyr992, Tyr1173 and Tyr992 in the NR6wtEGFR and NR6W cells with IC50 of 37 nM, 37nM, 26 nM and 57 nM, respectively.	C1(=C(C=C2C(=C1)N=CN=C2NC3=CC=C(C(=C3)Cl)F)OCCCN4CCOCC4)OC
L1200	816	-0.814916	FALSE	TRUE	TRUE	PF-4708671	PF-4708671 is a cell-permeable inhibitor of p70 ribosomal S6 kinase (S6K1 isoform) with Ki/IC50 of 20 nM/160 nM, 400-fold greater selectivity for S6K1 than S6K2, and 4- and >20-fold selectivity for S6K1 than MSK1 and RSK1/2, respectively. First S6K1-specific inhibitor to be reported.	N1C(=NC2=C1C=CC(=C2)C(F)(F)F)CN3CCN(C4=NC=NC=C4CC)CC3
L1200	855	-0.81001	FALSE	TRUE	TRUE	SC-514	SC-514 is an orally active, ATP-competitive IKK-2 inhibitor with IC50 of 3-12 μM, blocks NF-κB-dependent gene expression, does not inhibit other IKK isoforms or other serine-threonine and tyrosine kinases.	C1(=CC(=C(S1)C(=O)N)N)C2=CSC=C2
14030	805	-0.809622	FALSE	TRUE	TRUE	FLOPROPIONE	antispasmodic	CCC(=O)C1=C(O)C=C(O)C=C1O
LOPAC	727	-0.801413	FALSE	TRUE	TRUE	1-(m-Chlorophenyl)-biguanide hydrochloride	5-HT3 serotonergic receptor agonist	Cl.NC(=N)NC(=N)NC1=CC(Cl)=CC=C1
pfizer	829	-0.788697	FALSE	TRUE	TRUE	PF-3845	Lipid Signaling	O.FC(F)(F)C1=CC=C(OC2=CC(CC3CCN(CC3)C(=O)NC3=CN=CC=C3)=CC=C2)N=C1
14030	748	-0.788618	FALSE	TRUE	TRUE	NOREPINEPHRINE	adrenergic agonist, antihypotensive	NC[C@H](O)C1=CC=C(O)C(O)=C1
TM-L4	827	-0.784799	FALSE	TRUE	TRUE	Phenylephrine hydrochloride	Phenylephrine hydrochloride is a selective agonist of the α1-adrenergic receptor.	Oc1cccc([C@@H](O)CNC)c1.Cl
14030	893	-0.780227	FALSE	TRUE	TRUE	AMITRIPTYLINE HYDROCHLORIDE	antidepressant	Cl.CN(C)CCC=C1C2=C(CCC3=C1C=CC=C3)C=CC=C2
14030	731	-0.780181	FALSE	TRUE	TRUE	LISINOPRIL	ACE inhibitor	NCCCC[C@H](N[C@@H](CCC1=CC=CC=C1)C(O)=O)C(=O)N1CCC[C@H]1C(O)=O
14030	735	-0.768051	FALSE	TRUE	TRUE	AMODIAQUINE DIHYDROCHLORIDE	antimalarial	Cl.Cl.CCN(CC)CC1=CC=C(NC2=C3C=CC(Cl)=CC3=NC=C2)C=C1O
L1900	829	-0.766749	FALSE	TRUE	TRUE	EX 527 (Selisistat)	EX 527 is a potent and selective SIRT1 inhibitor with IC50 of 38 nM, exhibits >200-fold selectivity against SIRT2 and SIRT3.	N1C2=C(C3=C1C=CC(=C3)Cl)CCCC2C(=O)N
TM-L4	812	-0.747603	FALSE	TRUE	TRUE	Formoterol Hemifumarate	Formoterol Hemifumarate, an effective, specific and long-acting β2-adrenoceptor agonist, is utilized in the treatment of chronic obstructive pulmonary disease(COPD) and asthma.	OC(=O)\C=C\C(O)=O.COc1ccc(C[C@H](C)NC[C@@H](O)c2ccc(O)c(NC=O)c2)cc1.COc1ccc(C[C@@H](C)NC[C@H](O)c2ccc(O)c(NC=O)c2)cc1
14030	704	-0.747438	FALSE	TRUE	TRUE	ENILCONAZOLE SULFATE	antifungal	OS(O)(=O)=O.ClC1=CC=C(C(CN2C=CN=C2)OCC=C)C(Cl)=C1
14030	707	-0.74551	FALSE	TRUE	TRUE	CEFSULODIN SODIUM	antibacterial	[Na+].NC(=O)C1=CC=[N+](CC2=C(N3C(SC2)C(NC(=O)C(C2=CC=CC=C2)S([O-])(=O)=O)C3=O)C([O-])=O)C=C1
14030	962	-0.731711	FALSE	TRUE	TRUE	ADENOSINE	antiarrhythmic, cardiac depressant	NC1=C2N=CN([C@@H]3O[C@H](CO)[C@@H](O)[C@H]3O)C2=NC=N1
14030	697	-0.730642	FALSE	TRUE	TRUE	OXYBENZONE	ultraviolet screen	COC1=CC(O)=C(C=C1)C(=O)C1=CC=CC=C1
14030	755	-0.728105	FALSE	TRUE	TRUE	ISOPROTERENOL HYDROCHLORIDE	bronchodilator	Cl.CC(C)NCC(O)C1=CC(O)=C(O)C=C1
pfizer	765	-0.726265	FALSE	TRUE	TRUE	CP-91149	Phosphorylase	CN(C)C(=O)[C@H](O)[C@H](CC1=CC=CC=C1)NC(=O)C1=CC2=C(N1)C=CC(Cl)=C2
TM-L4	836	-0.725749	FALSE	TRUE	TRUE	VX661	VX-661 is a small molecule that can be used as a corrector of the cystic fibrosis transmembrane conductance regulator (CFTR) gene function.	CC(C)(CO)c1cc2cc(c(cc2n1C[C@H](CO)O)F)NC(=O)C1(c2cc3c(cc2)OC(O3)(F)F)CC1
L1900	736	-0.725286	FALSE	TRUE	TRUE	SGI-1776 free base	SGI-1776 is a novel ATP competitive inhibitor of Pim1 with IC50 of 7 nM, 50- and 10-fold selective versus Pim2 and Pim3, also potent to Flt3 and haspin. Phase 1.	C1C(=NN2C(C=1)=NC=C2C3=CC=CC(=C3)OC(F)(F)F)NCC4CCN(CC4)C
LOPAC	757	-0.720542	FALSE	TRUE	TRUE	Ribavirin	Antiviral agent; its metabolite, ribavirin 5'-phosphate, is an inhibitor of inosine monophosphate (IMP) dehydrogenase	NC(=O)C1=NN(C=N1)[C@@H]1O[C@H](CO)[C@@H](O)[C@H]1O
L1200	750	-0.711267	FALSE	TRUE	TRUE	Honokiol	Honokiol is the active principle of magnolia extract that inhibits Akt-phosphorylation and promotes ERK1/2phosphorylation. Phase 3.	C1(=C(C=C(C=C1)C2=CC(=CC=C2O)CC=C)CC=C)O
TM-L4	743	-0.710782	FALSE	TRUE	TRUE	Lenvatinib	Lenvatinib is a Kinase Inhibitor. The mechanism of action of lenvatinib is as a Receptor Tyrosine Kinase Inhibitor.	COc1cc2nccc(Oc3cc(Cl)c(NC(=O)NC4CC4)cc3)c2cc1C(=O)N
14030	644	-0.701328	FALSE	TRUE	TRUE	GEMFIBROZIL	antihyperlipoproteinemic	CC1=CC=C(C)C(OCCCC(C)(C)C(O)=O)=C1
14030	857	-0.700562	FALSE	TRUE	TRUE	METOPROLOL TARTRATE	antihypertensive, antianginal	OC(C(O)C(O)=O)C(O)=O.COCCC1=CC=C(OCC(O)CNC(C)C)C=C1
14030	542	-0.698546	FALSE	TRUE	TRUE	LEUCOVORIN CALCIUM	antianemic, antidote to folic acid antagonists	[Ca++].NC1=NC(=O)C2=C(NCC(CNC3=CC=C(C=C3)C(=O)N[C@@H](CCC([O-])=O)C([O-])=O)N2C=O)N1
14030	596	-0.693733	FALSE	TRUE	TRUE	NORTRIPTYLINE HYDROCHLORIDE	antidepressant	Cl.CNCCC=C1C2=C(CCC3=C1C=CC=C3)C=CC=C2
LOPAC	826	-0.688283	FALSE	TRUE	TRUE	A-68930 hydrochloride	Selective D1 dopamine receptor agonist .	Cl.NC[C@@H]1O[C@@H](CC2=C(O)C(O)=CC=C12)C1=CC=CC=C1
14030	703	-0.687595	FALSE	TRUE	TRUE	BITHIONATE SODIUM	anthelmintic, antiseptic	[Na+].[Na+].[O-]C1=C(SC2=CC(Cl)=CC(Cl)=C2[O-])C=C(Cl)C=C1Cl
LOPAC	729	-0.686142	FALSE	TRUE	TRUE	Candesartan cilexetil	Candesartan cilexetil is the prodrug form of the potent angiotensin II receptor antagonist, candesartan	CCOC1=NC2=C(N1CC1=CC=C(C=C1)C1=CC=CC=C1C1=NNN=N1)C(=CC=C2)C(=O)OC(C)OC(=O)OC1CCCCC1
14030	827	-0.685406	FALSE	TRUE	TRUE	MAPROTILINE HYDROCHLORIDE	antidepressant	Cl.CNCCCC12CCC(C3=CC=CC=C13)C1=C2C=CC=C1
L2300	859	-0.678341	FALSE	TRUE	TRUE	TCS PIM-1 4a		S1C(NC(C/1=C\C2C=C(C=CC=2)C(F)(F)F)=O)=O
14030	943	-0.677533	FALSE	TRUE	TRUE	CICLOPIROX OLAMINE	antifungal	NCCO.CC1=CC(=O)N(O)C(=C1)C1CCCCC1
LOPAC	842	-0.656959	FALSE	TRUE	TRUE	Dipropyldopamine hydrobromide	Dopamine receptor agonist	Br.CCCN(CCC)CCC1=CC=C(O)C(O)=C1
TM-L4	770	-0.652033	FALSE	TRUE	TRUE	Triclosan	Triclosan is an antibacterial and antifungal agent.	Oc1cc(Cl)ccc1Oc1ccc(Cl)cc1Cl
14030	894	-0.639346	FALSE	TRUE	TRUE	ISONIAZID	antibacterial, tuberculostatic	NNC(=O)C1=CC=NC=C1
LOPAC	652	-0.637085	FALSE	TRUE	TRUE	PF-573228	PF-573228 is a focal adhesion kinase (FAK) inhibitor; Non-receptor tyrosine kinase inhibitor	CS(=O)(=O)C1=CC=CC(CNC2=C(C=NC(NC3=CC4=C(NC(=O)CC4)C=C3)=N2)C(F)(F)F)=C1
14030	873	-0.635459	FALSE	TRUE	TRUE	METHOPRENE (S)	ectoparasiticide	COC(C)(C)CCC[C@H](C)C\C=C\C(\C)=C\C(=O)OC(C)C
14030	736	-0.633598	FALSE	TRUE	TRUE	OXTRIPHYLLINE	bronchodilator	C[N+](C)(C)CCO.CN1C2=C([N-]C=N2)C(=O)N(C)C1=O
L1900	744	-0.629435	FALSE	TRUE	TRUE	SHAM CONTROL	SHAM CONTROL	SHAM CONTROL
L1200	681	-0.61598	FALSE	TRUE	TRUE	KW-2449	KW-2449 is a multiple-targeted inhibitor, mostly for Flt3 with IC50 of 6.6 nM, modestly potent to FGFR1, Bcr-Abl and Aurora A; little effect on PDGFRβ, IGF-1R, EGFR. Phase 1.	C1=CC=CC2=C1NN=C2/C=C/C3=CC=C(C=C3)C(=O)N4CCNCC4
14030	972	-0.610862	FALSE	TRUE	TRUE	PREDNISOLONE	glucocorticoid	C[C@]12C[C@H](O)C3C(CCC4=CC(=O)C=C[C@]34C)C1CC[C@]2(O)C(=O)CO
TM-L4	710	-0.610436	FALSE	TRUE	TRUE	Rebeprazole sodium	Rabeprazole sodium is a 4-(3-methoxypropoxy)-3-methylpyridinyl derivative of timoprazole that is used in the therapy of stomach ulcers and Zollinger-Ellison syndrome. The drug inhibits H(+)-K(+)-exchanging ATPase which is found in gastric parietal cells.	c12c([n-]c(n1)S(=O)Cc1c(c(ccn1)OCCCOC)C)cccc2.[Na+]
TM-L4	818	-0.606232	FALSE	TRUE	TRUE	proline	1. L-Proline is an osmoprotectant. 2. Proline and its derivatives are often used as asymmetric catalysts in organic reactions, as the CBS reduction and proline catalysed aldol condensation.	OC(=O)[C@@H]1CCCN1
14030	465	-0.605114	FALSE	TRUE	TRUE	IPRATROPIUM BROMIDE	bronchodilator, antiarrhythmic	[Br-].CC(C)[N+]1(C)C2CC[C@H]1C[C@H](C2)OC(=O)C(CO)C1=CC=CC=C1
14030	576	-0.602358	FALSE	TRUE	TRUE	NAFCILLIN SODIUM	antibacterial	[Na+].CCOC1=CC=C2C=CC=CC2=C1NC(=O)[C@H]1[C@H]2SC(C)(C)C(N2C1=O)C([O-])=O
14030	909	-0.598466	FALSE	TRUE	TRUE	EPHEDRINE (1R,2S) HYDROCHLORIDE	bronchodilator, cardiac stimulant	Cl.CNC(C)[C@H](O)C1=CC=CC=C1
14030	809	-0.597739	FALSE	TRUE	TRUE	ERGONOVINE MALEATE	oxytocic, 5HT antagonist	OC(=O)\C=C/C(O)=O.CC(CO)NC(=O)C1CN(C)[C@@H]2CC3=CNC4=C3C(=CC=C4)C2=C1
14030	799	-0.595477	FALSE	TRUE	TRUE	NIFUROXAZIDE	antiseptic	OC1=CC=C(C=C1)C(=O)N\N=C\C1=CC=C(O1)[N+]([O-])=O
14030	551	-0.588588	FALSE	TRUE	TRUE	MOXALACTAM DISODIUM	antibacterial	[Na+].[Na+].CO[C@]1(NC(=O)C(C([O-])=O)C2=CC=C(O)C=C2)[C@H]2OCC(CSC3=NN=NN3C)=C(N2C1=O)C([O-])=O
L1200	795	-0.58846	FALSE	TRUE	TRUE	JNJ-38877605	JNJ-38877605 is an ATP-competitive inhibitor of c-Met with IC50 of 4 nM, 600-fold selective for c-Met than 200 other tyrosine and serine-threonine kinases. Phase 1.	N1=CC=CC2=C1C=CC(=C2)C(C3N4C(=NN=3)C=CC(=N4)C5C=NN(C=5)C)(F)F
14030	755	-0.585314	FALSE	TRUE	TRUE	TOLFENAMIC ACID	antiinflammatory, analgesia	CC1=C(Cl)C=CC=C1NC1=C(C=CC=C1)C(O)=O
TM-L4	829	-0.582678	FALSE	TRUE	TRUE	BI 1744 hydrochloride	Olodaterol is a novel, long-acting β2-adrenergic agonist (EC50s: 97.7 nM for the human β2-adrenoceptor) that exerts its pharmacological effect by binding and activating β2-adrenergic receptors.	Cl.COc1ccc(CC(C)(C)NC[C@H](O)c2cc(O)cc3NC(=O)COc23)cc1
14030	551	-0.576655	FALSE	TRUE	TRUE	NORFLOXACIN	antibacterial	CCN1C=C(C(O)=O)C(=O)C2=C1C=C(N1CCNCC1)C(F)=C2
14030	848	-0.575843	FALSE	TRUE	TRUE	ISOETHARINE MESYLATE	bronchodilator	CS(O)(=O)=O.CCC(NC(C)C)C(O)C1=CC(O)=C(O)C=C1
14030	856	-0.575459	FALSE	TRUE	TRUE	2',4-DIHYDROXYCHALCONE	antineoplastic	OC1=CC=C(\C=C\C(=O)C2=CC=CC=C2O)C=C1
L1900	731	-0.56943	FALSE	TRUE	TRUE	Aurora A Inhibitor I	Aurora A Inhibitor I is a novel, potent, and selective inhibitor of Aurora A with IC50 of 3.4 nM. It is 1000-fold more selective for Aurora A than Aurora B.	N1=CC(=C(N=C1NC2=CC=C(C=C2)CC(N3CCN(CC3)CC)=O)NC4=CC=C(C=C4)C(NC5=CC=CC=C5Cl)=O)F
14030	639	-0.559275	FALSE	TRUE	TRUE	MEDROXYPROGESTERONE ACETATE	contraceptive	C[C@H]1CC2C3CC[C@](OC(C)=O)(C(C)=O)[C@@]3(C)CCC2[C@@]2(C)CCC(=O)C=C12
TM-L4	778	-0.54497	FALSE	TRUE	TRUE	Ritodrine hydrochloride	Ritodrine binds to and activates beta-2 adrenergic receptors of myometrial cells in the uterus, which decreases the intensity and frequency of uterine contractions. Ritodrine is a phenethylamine derivative with tocolytic activity. Specifically, ritodrine probably activates adenyl cyclase, thereby increasing production of cyclic adenosine monophosphate (cAMP), which in turn enhances the efflux of …	Cl.C[C@H](NCCc1ccc(O)cc1)[C@H](O)c1ccc(O)cc1
L1200	855	-0.544303	FALSE	TRUE	TRUE	AZD6482	AZD6482 is a PI3Kβ inhibitor with IC50 of 10 nM, 8-, 87- and 109-fold more selective to PI3Kβ than PI3Kδ, PI3Kα and PI3Kγ. Phase 1.	C(C1C(=CC=CC=1)N[C@H](C)C2=CC(=CN3C(C=C(N=C32)N4CCOCC4)=O)C)(=O)O
14030	658	-0.542529	FALSE	TRUE	TRUE	KETOCONAZOLE	antifungal, PXR/SRC1 & CAR/SRC1 inhibitor	CC(=O)N1CCN(CC1)C1=CC=C(OCC2CO[C@@](CN3C=CN=C3)(O2)C2=CC=C(Cl)C=C2Cl)C=C1
14030	778	-0.541728	FALSE	TRUE	TRUE	BENZOIC ACID	antifungal	OC(=O)C1=CC=CC=C1
14030	617	-0.540222	FALSE	TRUE	TRUE	PROBENECID	uricosuric	CCCN(CCC)S(=O)(=O)C1=CC=C(C=C1)C(O)=O
TM-L4	865	-0.535474	FALSE	TRUE	TRUE	Dihydroergotoxine mesylate	It is mainly used to improve symptoms and physical symptoms of mental degeneration related to aging.	CS(O)(=O)=O.CC(C)[C@@H]1N2C(=O)[C@](NC(=O)[C@@H]3C[C@H]4[C@@H](Cc5c[nH]c6cccc4c56)N(C)C3)(O[C@@]2(O)[C@@H]2CCCN2C1=O)C(C)C.CCC(C)[C@@H]1N2C(=O)[C@](NC(=O)[C@@H]3C[C@H]4[C@@H](Cc5c[nH]c6cccc4c56)N(C)C3)(O[C@@]2(O)[C@@H]2CCCN2C1=O)C(C)C.CC(C)C[C@@H]1N2C(=O)[C@](NC(=O)[C@@H]3C[C@H]4[C@@H](Cc5c[nH]c6cccc4c56)N(C)C3)(O[C@@]2(O)[C@@H]2CCCN2C1=O)C(C)C.CC(C)[C@@]1(NC(=O)[C@@H]2C[C@H]3[C@@H](Cc4c[nH]c5ccc…
14030	582	-0.532987	FALSE	TRUE	TRUE	DESIPRAMINE HYDROCHLORIDE	antidepressant	Cl.CNCCCN1C2=C(CCC3=C1C=CC=C3)C=CC=C2
TM-L4	789	-0.532925	FALSE	TRUE	TRUE	threonine	Threonine is an essential amino acid in humans (provided by food), Threonine is an important residue of many proteins, such as tooth enamel, collagen, and elastin. An important amino acid for the nervous system, threonine also plays an important role in porphyrin and fat metabolism and prevents fat buildup in the liver. Useful with intestinal disorders and indigestion, threonine has also been use…	C[C@@H](O)[C@H](N)C(O)=O
LOPAC	884	-0.532252	FALSE	TRUE	TRUE	Apigenin	Arrests cell cycle at G2/M phase	OC1=CC=C(C=C1)C1=CC(=O)C2=C(O1)C=C(O)C=C2O
LOPAC	828	-0.527116	FALSE	TRUE	TRUE	Metaproterenol hemisulfate	beta2-Adrenoceptor agonist	OS(O)(=O)=O.CC(C)NCC(O)C1=CC(O)=CC(O)=C1.CC(C)NCC(O)C1=CC(O)=CC(O)=C1
14030	812	-0.521549	FALSE	TRUE	TRUE	DIGOXIN	cardiac stimulant	C[C@H]1O[C@H](C[C@H](O)[C@@H]1O)O[C@H]1[C@@H](O)C[C@H](O[C@H]2[C@@H](O)C[C@H](O[C@H]3CC[C@@]4(C)[C@H](CCC5C4C[C@@H](O)[C@]4(C)[C@H](CC[C@]54O)C4=CC(=O)OC4)C3)O[C@@H]2C)O[C@@H]1C
L1900	788	-0.520226	FALSE	TRUE	TRUE	SHAM CONTROL	SHAM CONTROL	SHAM CONTROL
LOPAC	695	-0.516076	FALSE	TRUE	TRUE	Rutaecarpine	Delayed rectifier K+ channel blocker; inhibits platelet aggregation; vasoldilator	O=C1N2CCC3=C(NC4=C3C=CC=C4)C2=NC2=C1C=CC=C2
L1200	849	-0.512888	FALSE	TRUE	TRUE	NVP-BVU972	NVP-BVU972 is a selective and potent Met inhibitor with IC50 of 14 nM.	C1C(=NN2C(C=1)=NC=C2CC3=CC=C4C(=C3)C=CC=N4)C5C=NN(C=5)C
TM-L4	797	-0.508569	FALSE	TRUE	TRUE	Isavuconazole	Isavuconazole(BAL-4815; RO-0094815) is the active component of the new azole antifungal agent BAL8557 with MIC(50)s/MIC(90)s ranged from 0.002/0.004 mg/liter for C. albicans to 0.25/0.5 mg/liter for C. glabrata.	C(#N)c1ccc(cc1)c1nc(sc1)[C@H](C)[C@@](Cn1ncnc1)(O)c1c(ccc(c1)F)F
LOPAC	729	-0.506267	FALSE	TRUE	TRUE	Etazolate hydrochloride	Phosphodiesterase inhibitor	Cl.CCOC(=O)C1=CN=C2N(CC)N=CC2=C1NN=C(C)C
TM-L4	670	-0.506139	FALSE	TRUE	TRUE	Phenoxybenzamine hydrochloride	Phenoxybenzamine Hydrochloride is the hydrochloride salt form of phenoxybenzamine, a synthetic, dibenzamine alpha-adrenergic antagonist with antihypertensive and vasodilatory properties. Phenoxybenzamine non-selectively and irreversibly blocks the postsynaptic alpha-adrenergic receptor in smooth muscle, thereby preventing vasoconstriction, relieving vasospasms, and decreasing peripheral resistanc…	Cl.CC(COc1ccccc1)N(CCCl)Cc1ccccc1
14030	746	-0.505779	FALSE	TRUE	TRUE	FOMEPIZOLE	alcohol dehydrogenase inhibitor, antidote	CC1=CNN=C1
14030	815	-0.500428	FALSE	TRUE	TRUE	FORMESTANE	antineoplastic, aromatase inhibitor	CC1=C2CCC3C4CCC(=O)[C@@]4(C)CCC3[C@@]2(C)CCC1=O
L2300	801	-0.499998	FALSE	TRUE	TRUE	PF-4708671		C1(NC2C(N=1)=CC(=CC=2)C(F)(F)F)CN3CCN(CC3)C4N=CN=CC=4CC
L2300	788	-0.49645	FALSE	TRUE	TRUE	SANT-2		C(C1C=C(C(=C(C=1)OCC)OCC)OCC)(=O)NC2C=C(C(=CC=2)Cl)C3=NC4C(N3)=CC=CC=4
TM-L4	866	-0.49601	FALSE	TRUE	TRUE	Vilazodone	Vilazodone is a selective serotonin (5-HT) reuptake inhibitor (SSRI) and a 5-HT-1A receptor partial agonist, with antidepressant and anti-anxiety activities. Vilazodone inhibits the reuptake of serotonin from the synaptic cleft while stimulating the release of 5-HT into the synaptic cleft. This increases the concentration of 5-HT in the synaptic cleft and potentiates serotonergic neurotransmissio…	C1CN(CCN1CCCCC2=CNC3=C2C=C(C=C3)C#N)C4=CC5=C(C=C4)OC(=C5)C(=O)N
LOPAC	776	-0.490609	FALSE	TRUE	TRUE	(±)-SKF 38393, N-allyl-, hydrobromide	D1 dopamine receptor agonist.	Br.OC1=CC2=C(C=C1O)C(CN(CC=C)CC2)C1=CC=CC=C1
14030	545	-0.484016	FALSE	TRUE	TRUE	FLUOCINONIDE	antiinflammatory, glucocorticoid	CC(=O)OCC(=O)[C@@]12OC(C)(C)O[C@@H]1CC1C3C[C@H](F)C4=CC(=O)C=C[C@]4(C)[C@@]3(F)[C@@H](O)C[C@]21C
14030	754	-0.48321	FALSE	TRUE	TRUE	NONIVAMIDE	analgesic (topical), depletes Substance P	CCCCCCCCC(=O)NCC1=CC=C(O)C(OC)=C1
LOPAC	709	-0.481102	FALSE	TRUE	TRUE	CP-226269	CP-226269 is a D4 dopamine receptor agonist with EC50 of 32 nM	FC1=CC=C2NC(CN3CCN(CC3)C3=NC=CC=C3)=CC2=C1
L1200	719	-0.480999	FALSE	TRUE	TRUE	PD184352 (CI-1040)	CI-1040 (PD 184352) is an ATP non-competitive MEK1/2 inhibitor with IC50 of 17 nM, 100-fold more selective for MEK1/2 than MEK5. Phase 2.	C1=C(C(=C(C(=C1)C(NOCC2CC2)=O)NC3=CC=C(C=C3Cl)I)F)F
LOPAC	799	-0.478053	FALSE	TRUE	TRUE	(±)-Sulpiride	D2 Dopamine receptor antagonist; antipsychotic	CCN1CCCC1CNC(=O)C1=C(OC)C=CC(=C1)S(N)(=O)=O
LOPAC	723	-0.475752	FALSE	TRUE	TRUE	beta-Lapachone	Induces apoptosis in HL-60 cells; anticancer agent	CC1(C)CCC2=C(O1)C1=CC=CC=C1C(=O)C2=O
14030	756	-0.473468	FALSE	TRUE	TRUE	ANAGRELIDE HYDROCHLORIDE	antithrombotic	Cl.ClC1=CC=C2N=C3NC(=O)CN3CC2=C1Cl
LOPAC	775	-0.471356	FALSE	TRUE	TRUE	Acepromazine maleate	Acepromazine is a phenothiazine antipsychotic comonly used as a veterinary drug (horses, dogs and cats).	OC(=O)\C=C/C(O)=O.CN(C)CCCN1C2=C(SC3=C1C=C(C=C3)C(C)=O)C=CC=C2
L2300	815	-0.470101	FALSE	TRUE	TRUE	GSK461364	GSK461364 inhibits purified Plk1 with Ki of 2 nM.	C1N(CCN(C1)CC2=CC3=C(C=C2)N=CN3C4=CC(=C(S4)C(=O)N)O[C@H](C)C5=CC=CC=C5C(F)(F)F)C
14030	657	-0.466488	FALSE	TRUE	TRUE	GALLAMINE TRIETHIODIDE	muscle relaxant (skeletal)	[I-].[I-].[I-].CC[N+](CC)(CC)CCOC1=CC=CC(OCC[N+](CC)(CC)CC)=C1OCC[N+](CC)(CC)CC
14030	734	-0.46085	FALSE	TRUE	TRUE	METHYL 7-DESOXYPURPUROGALLIN-7-CARBOXYLATE TRIMETHYL ETHER		COC(=O)C1=CC2=C(C(OC)=C(OC)C=C2)C(=O)C(OC)=C1
L2300	695	-0.46081	FALSE	TRUE	TRUE	JNJ 26854165 (Serdemetan)	JNJ 26854165 (Serdemetan) is an orally bioavailable HDM2 antagonist.	C1=C2C(=CC=C1)NC=C2CCNC3=CC=C(C=C3)NC4=CC=NC=C4
14030	871	-0.46065	FALSE	TRUE	TRUE	GLUTATHIONE	antioxidant	N[C@@H](CCC(=O)N[C@@H](CS)C(=O)NCC(O)=O)C(O)=O
TM-L4	782	-0.459683	FALSE	TRUE	TRUE	Salbutamol Sulfate	Salbutamol Sulfate is a short-acting β2-adrenergic receptor agonist with an IC50 of 8.93 μM.	OS(O)(=O)=O.CC(C)(C)NCC(O)c1ccc(O)c(CO)c1.CC(C)(C)NCC(O)c1ccc(O)c(CO)c1
LOPAC	857	-0.4593	FALSE	TRUE	TRUE	Ritodrine hydrochloride	beta2-Adrenoceptor agonist; relaxes uterine muscle contractions	Cl.C[C@@H](NCCC1=CC=C(O)C=C1)[C@@H](O)C1=CC=C(O)C=C1
14030	880	-0.45816	FALSE	TRUE	TRUE	METHOTREXATE(+/-)	antineoplastic, antirheumatic, folic acid antagonist	CN(CC1=CN=C2N=C(N)N=C(N)C2=N1)C1=CC=C(C=C1)C(=O)NC(CCC(O)=O)C(O)=O
14030	671	-0.451369	FALSE	TRUE	TRUE	PHYSOSTIGMINE SALICYLATE	cholinergic, anticholinesterase, miotic	OC(=O)C1=C(O)C=CC=C1.CNC(=O)OC1=CC2=C(C=C1)N(C)[C@H]1N(C)CC[C@@]21C
LOPAC	668	-0.451186	FALSE	TRUE	TRUE	Tocainide hydrochloride	Sodium channel blocker. Class IB antiarrhythmic.	Cl.CC(N)C(=O)NC1=C(C)C=CC=C1C
14030	615	-0.447371	FALSE	TRUE	TRUE	PROCYCLIDINE HYDROCHLORIDE	anticholinergic	Cl.OC(CCN1CCCC1)(C1CCCCC1)C1=CC=CC=C1
LOPAC	635	-0.446143	FALSE	TRUE	TRUE	ML-7	Selective myosin light chain kinase (MLCK) inhibitor	Cl.IC1=C2C=CC=C(C2=CC=C1)S(=O)(=O)N1CCCNCC1
L1900	783	-0.441144	FALSE	TRUE	TRUE	SHAM CONTROL	SHAM CONTROL	SHAM CONTROL
LOPAC	760	-0.440931	FALSE	TRUE	TRUE	GBR-12935 dihydrochloride	Dopamine reuptake inhibitor	Cl.Cl.C(CN1CCN(CCOC(C2=CC=CC=C2)C2=CC=CC=C2)CC1)CC1=CC=CC=C1
14030	801	-0.440559	FALSE	TRUE	TRUE	RITODRINE HYDROCHLORIDE	muscle relaxant (smooth)	Cl.CC(NCCC1=CC=C(O)C=C1)C(O)C1=CC=C(O)C=C1
LOPAC	632	-0.439688	FALSE	TRUE	TRUE	Mibefradil dihydrochloride	T-type Ca2+ channel blocker	Cl.Cl.COCC(=O)O[C@]1(CCN(C)CCCC2=NC3=C(N2)C=CC=C3)CCC2=C(C=CC(F)=C2)[C@@H]1C(C)C
L1900	768	-0.432305	FALSE	TRUE	TRUE	MM-102	MM-102 is a high-affinity peptidomimetic MLL1 inhibitor with IC50 of 0.4 μM.	C1CC(CC1)(NC([C@@H](NC(=O)C(NC(=O)C(C)C)(CC)CC)CCCNC(N)=N)=O)C(=O)NC(C2=CC=C(C=C2)F)C3=CC=C(C=C3)F
TM-L4	778	-0.432204	FALSE	TRUE	TRUE	Fluvoxamine maleate	Fluvoxamine maleate is a selective serotonin reuptake inhibitor that is used in the treatment of depression and a variety of anxiety disorders.	c1(/C(=N/OCCN)/CCCCOC)ccc(cc1)C(F)(F)F.C(=C\C(=O)O)\C(=O)O
14030	969	-0.430083	FALSE	TRUE	TRUE	CRESOL	antiinfectant	CC1=CC=C(O)C=C1
14030	645	-0.425403	FALSE	TRUE	TRUE	FLURBIPROFEN	antiinflammatory, analgesic	CC(C(O)=O)C1=CC(F)=C(C=C1)C1=CC=CC=C1
L2300	765	-0.424507	FALSE	TRUE	TRUE	SHAM CONTROL	SHAM CONTROL	SHAM CONTROL
TM-L4	841	-0.4231	FALSE	TRUE	TRUE	Orciprenaline sulfate	Orciprenaline sulfate is a beta-2 adrenergic agonist used in the treatment of ASTHMA and BRONCHIAL SPASM.	c1(cc(cc(c1)C(CNC(C)C)O)O)O.S(=O)(=O)(O)O.c1(cc(cc(c1)C(CNC(C)C)O)O)O
TM-L4	665	-0.421793	FALSE	TRUE	TRUE	Baricitinib	Baricitinib is an orally bioavailable inhibitor of Janus kinases 1 and 2 (JAK1/2), with potential anti-inflammatory, immunomodulating and antineoplastic activities.	CCS(=O)(=O)N1CC(C1)(CC#N)n1cc(cn1)c1c2cc[nH]c2ncn1
LOPAC	764	-0.41691	FALSE	TRUE	TRUE	Doxazosin mesylate	alpha1 adrenoceptor blocker	CS(O)(=O)=O.COC1=C(OC)C=C2C(N)=NC(=NC2=C1)N1CCN(CC1)C(=O)C1COC2=C(O1)C=CC=C2
LOPAC	693	-0.409098	FALSE	TRUE	TRUE	Betaxolol hydrochloride	Selective beta1 adrenoceptor antagonist	Cl.CC(C)NCC(O)COC1=CC=C(CCOCC2CC2)C=C1
14030	715	-0.407707	FALSE	TRUE	TRUE	ASTEMIZOLE	H1 antihistamine (nonsedating)	COC1=CC=C(CCN2CCC(CC2)NC2=NC3=C(C=CC=C3)N2CC2=CC=C(F)C=C2)C=C1
LOPAC	789	-0.407643	FALSE	TRUE	TRUE	N6-Cyclohexyladenosine	Selective A1 adenosine receptor agonist	OC[C@H]1O[C@H]([C@H](O)[C@@H]1O)N1C=NC2=C1N=CN=C2NC1CCCCC1
TM-L4	813	-0.402179	FALSE	TRUE	TRUE	Epinephrine HCl	Epinephrine HCl is a hormone and a neurotransmitter.	Cl.CNC[C@H](O)C1=CC=C(O)C(O)=C1
L1200	869	-0.391323	FALSE	TRUE	TRUE	KU-60019	KU-60019 is an improved analogue of KU-55933, with IC50 of 6.3 nM for ATM, 270- and 1600-fold more selective for ATM than DNA-PK and ATR,and is a highly effective radiosensitizer.	C1=C(C=CC2=C1CC3=C(S2)C(=CC=C3)C4=CC(C=C(O4)N5CCOCC5)=O)NC(CN6C[C@@H](O[C@@H](C6)C)C)=O
14030	843	-0.391053	FALSE	TRUE	TRUE	ETHAVERINE HYDROCHLORIDE	antispasmodic	Cl.CCOC1=CC=C(CC2=C3C=C(OCC)C(OCC)=CC3=CC=N2)C=C1OCC
14030	666	-0.389541	FALSE	TRUE	TRUE	CLINDAMYCIN HYDROCHLORIDE	antibacterial, inhibits protein synthesis	Cl.CCC[C@@H]1C[C@H](N(C)C1)C(=O)N[C@H]([C@H](C)Cl)C1O[C@H](SC)[C@H](O)[C@@H](O)[C@H]1O
LOPAC	758	-0.386034	FALSE	TRUE	TRUE	Glybenclamide	Antidiabetic agent which blocks pancreatic ATP-dependent K+ channels resulting in an increase in intracellular Ca2+ and consequent insulin secretion	COC1=CC=C(Cl)C=C1C(=O)NCCC1=CC=C(C=C1)S(=O)(=O)NC(=O)NC1CCCCC1
LOPAC	712	-0.384568	FALSE	TRUE	TRUE	Brequinar sodium salt hydrate	Brequinar inhibits dihydroorotate dehydrogenase (DHODH), the fourth enzyme in the de novo pyrimidine biosynthesis pathway, preventing the synthesis of DNA and RNA	[Na+].CC1=C(C([O-])=O)C2=C(C=CC(F)=C2)N=C1C1=CC=C(C=C1)C1=C(F)C=CC=C1
14030	814	-0.381147	FALSE	TRUE	TRUE	DESACETYLCOLFORSIN		CC1(C)CC[C@H](O)[C@@]2(C)C1[C@H](O)[C@H](O)[C@@]1(C)O[C@](C)(CC(=O)[C@]21O)C=C
14030	819	-0.374347	FALSE	TRUE	TRUE	CARBARIL	antiparacitic, insecticide	CNC(=O)OC1=CC=CC2=CC=CC=C12
TM-L4	832	-0.372531	FALSE	TRUE	TRUE	Azithromycin	Azithromycin is an antibiotic by inhibiting protein synthesis, used for the treatment of bacterial infections.	CC[C@H]1OC(=O)[C@H](C)[C@@H](O[C@H]2C[C@@](C)(OC)[C@@H](O)[C@H](C)O2)[C@H](C)[C@@H](O[C@@H]2O[C@H](C)C[C@@H]([C@H]2O)N(C)C)[C@](C)(O)C[C@@H](C)CN(C)[C@H](C)[C@@H](O)[C@]1(C)O
L2300	747	-0.369572	FALSE	TRUE	TRUE	SHAM CONTROL	SHAM CONTROL	SHAM CONTROL
14030	744	-0.356891	FALSE	TRUE	TRUE	ACETOHYDROXAMIC ACID	urease inhibitor, antiurolithic, antbacterial	CC(=O)NO
LOPAC	721	-0.356642	FALSE	TRUE	TRUE	Tegafur	Tegafur is a pro-drug of 5-fluorouracil, an antimetabolite used as an antineoplastic agent	FC1=CN(C2CCCO2)C(=O)NC1=O
14030	731	-0.355307	FALSE	TRUE	TRUE	METHYLERGONOVINE MALEATE	oxytocic	OC(=O)\C=C/C(O)=O.CC[C@@H](CO)NC(=O)[C@H]1CN(C)[C@@H]2CC3=CNC4=CC=CC(=C34)C2=C1
14030	747	-0.353844	FALSE	TRUE	TRUE	CINTRIAMIDE	antipsychotic	COC1=CC(\C=C\C(N)=O)=CC(OC)=C1OC
LOPAC	773	-0.349679	FALSE	TRUE	TRUE	Formoterol	beta2-Adrenoceptor agonist	OC(=O)\C=C\C(O)=O.C[C@@H](CC1=CC=C(C=O)C=C1)NC[C@@H](O)C1=CC(NCO)=C(O)C=C1.C[C@@H](CC1=CC=C(C=O)C=C1)NC[C@@H](O)C1=CC(NCO)=C(O)C=C1
14030	554	-0.347614	FALSE	TRUE	TRUE	METHIMAZOLE	antihyperthyroid	CN1C=CNC1=S
14030	758	-0.346432	FALSE	TRUE	TRUE	GABOXADOL HYDROCHLORIDE	GABAa agonist, GABAc antagonist	Cl.OC1=NOC2=C1CCNC2
14030	826	-0.346103	FALSE	TRUE	TRUE	DIACETAMATE	analgesic, antiinflammatory	CC(=O)NC1=CC=C(OC(C)=O)C=C1
L2300	758	-0.339597	FALSE	TRUE	TRUE	LY 333531		C12(=C(C(NC1=O)=O)C3=CN(C4=C3C=CC=C4)CC[C@@H](OCCN5C6=C(C2=C5)C=CC=C6)CN(C)C).CS(=O)(=O)O
LOPAC	692	-0.338718	FALSE	TRUE	TRUE	Procainamide hydrochloride	Na+ channel blocker and Class I anti-arrhythmic	Cl.CCN(CC)CCNC(=O)C1=CC=C(N)C=C1
L2300	786	-0.333436	FALSE	TRUE	TRUE	SHAM CONTROL	SHAM CONTROL	SHAM CONTROL
TM-L4	649	-0.331374	FALSE	TRUE	TRUE	Clioquinol	Clioquinol is an orally bioavailable, lipophilic, copper-binding, halogenated 8-hydroxyquinoline with antifungal, antiparasitic and potential antitumor activities.	Oc1c(I)cc(Cl)c2c1nccc2
14030	718	-0.323045	FALSE	TRUE	TRUE	FLUDROCORTISONE ACETATE	mineralocorticoid	CC(=O)OCC(=O)[C@@]1(O)CCC2C3CCC4=CC(=O)CC[C@]4(C)[C@@]3(F)[C@@H](O)C[C@]12C
LOPAC	831	-0.315439	FALSE	TRUE	TRUE	L(-)-Norepinephrine bitartrate	Adrenergic neurotransmitter; vasoconstrictor	OC(C(O)C(O)=O)C(O)=O.NC[C@H](O)C1=CC=C(O)C(O)=C1
L2300	772	-0.31455	FALSE	TRUE	TRUE	LY2157299	LY2157299 is a potent TGFβ receptor I (TβRI) inhibitor with IC50 of 56 nM.	C1(=CC=CC(=N1)C2=NN3C(=C(C4=CC=NC5=C4C=C(C=C5)C(=O)N)2)CCC3)C
L1900	773	-0.31333	FALSE	TRUE	TRUE	LAQ824 (Dacinostat)	LAQ824 (Dacinostat) is a novel HDAC inhibitor with IC50 of 32 nM and is known to activate the p21 promoter.	C1(=CC=C(C=C1)CN(CCO)CCC2=CNC3=C2C=CC=C3)/C=C/C(NO)=O
14030	911	-0.312768	FALSE	TRUE	TRUE	SALICYLANILIDE	antipyretic, fungicide	OC1=CC=CC=C1C(=O)NC1=CC=CC=C1
LOPAC	805	-0.31141	FALSE	TRUE	TRUE	Rotenone	Inhibitor of mitochondrial electron transport	COC1=CC2=C(C=C1OC)[C@H]1[C@@H](CO2)OC2=C(C=CC3=C2C[C@@H](O3)C(C)=C)C1=O
L2300	760	-0.310529	FALSE	TRUE	TRUE	GW3965 HCl	GW3965 is a potent, selective LXR agonist, which exhibits its potency in the LXRα/SRC1 LiSA and LXRα-GAL4 with EC50 of 125 nM and 190 nM, respectively.	C1(=C(C=C(C=C1)OCCCN(CC2=CC=CC(=C2Cl)C(F)(F)F)CC(C3=CC=CC=C3)C4=CC=CC=C4)CC(=O)O).Cl
L1200	759	-0.309913	FALSE	TRUE	TRUE	Apatinib	Apatinib is an orally bioavailable, selective VEGFR2 inhibitor with IC50 of 1 nM.	S(=O)(O)(C)=O.C1=CN=C(C(=C1)C(NC2=CC=C(C=C2)C3(CCCC3)C#N)=O)NCC4=CC=NC=C4
14030	867	-0.309816	FALSE	TRUE	TRUE	SALINOMYCIN, SODIUM	antibacterial	[Na+].CC[C@H]([C@H]1CC[C@H](C)[C@@H](O1)[C@@H](C)[C@H](O)[C@H](C)C(=O)[C@H](CC)[C@H]1OC2(O[C@@]3(CC[C@](C)(O3)[C@H]3CC[C@](O)(CC)[C@H](C)O3)[C@H](O)C=C2)[C@H](C)C[C@@H]1C)C([O-])=O
14030	666	-0.30335	FALSE	TRUE	TRUE	FUROSEMIDE	diuretic, antihypertensive	NS(=O)(=O)C1=C(Cl)C=C(NCC2=CC=CO2)C(=C1)C(O)=O
L2300	795	-0.301553	FALSE	TRUE	TRUE	SKF 91488		C(=N)(SCCCCN(C)C)N
LOPAC	785	-0.301109	FALSE	TRUE	TRUE	(E)-4-amino-2-butenoic acid	Potent GABA-C receptor agonist.	NC\C=C\C(O)=O
14030	570	-0.301044	FALSE	TRUE	TRUE	DIBUCAINE HYDROCHLORIDE	anesthetic (local)	Cl.CCCCOC1=CC(C(=O)NCCN(CC)CC)=C2C=CC=CC2=N1
14030	782	-0.300433	FALSE	TRUE	TRUE	NAFTOPIDIL	antihypertensive, alpha-blocker, 5HT1a agonist	COC1=C(C=CC=C1)N1CCN(CC(O)COC2=CC=CC3=CC=CC=C23)CC1
LOPAC	626	-0.296713	FALSE	TRUE	TRUE	Perphenazine	D2 dopamine receptor antagonist; sigma receptor agonist; phenothiazine antipsychotic	OCCN1CCN(CCCN2C3=CC=CC=C3SC3=C2C=C(Cl)C=C3)CC1
14030	640	-0.295693	FALSE	TRUE	TRUE	CLIDINIUM BROMIDE	anticholinergic	[Br-].C[N+]12CCC(CC1)C(C2)OC(=O)C(O)(C1=CC=CC=C1)C1=CC=CC=C1
14030	725	-0.295372	FALSE	TRUE	TRUE	ACETOHEXAMIDE	antidiabetic	CC(=O)C1=CC=C(C=C1)S(=O)(=O)NC(=O)NC1CCCCC1
14030	958	-0.29408	FALSE	TRUE	TRUE	NEOSTIGMINE BROMIDE	cholinergic	[Br-].CN(C)C(=O)OC1=CC(=CC=C1)[N+](C)(C)C
LOPAC	799	-0.293153	FALSE	TRUE	TRUE	UK 14,304	alpha2 Adrenoceptor agonist	BrC1=C(NC2=NCCN2)C=CC2=C1N=CC=N2
TM-L4	671	-0.293142	FALSE	TRUE	TRUE	Pentamidine isethionate	Pentamidine isethionate is a synthetic amidine derivative, Pentamidine Isethionate is an antiprotozoal and antifungal agent.	OCCS(O)(=O)=O.OCCS(O)(=O)=O.NC(=N)C1=CC=C(OCCCCCOC2=CC=C(C=C2)C(N)=N)C=C1
14030	826	-0.292844	FALSE	TRUE	TRUE	HEXYLRESORCINOL	anthelmintic, topical antiseptic	CCCCCCC1=C(O)C=C(O)C=C1
L1200	919	-0.292716	FALSE	TRUE	TRUE	Palbociclib (PD-0332991) HCl	PD0332991 is a highly selective inhibitor of CDK4/6 with IC50 of 11 nM/16 nM. It shows no activity against CDK1/2/5, EGFR, FGFR, PDGFR, InsR, etc. Phase 2/3.	N1(=C(N=C2C(=C1)C(=C(C(N2C3CCCC3)=O)C(C)=O)C)NC4=NC=C(C=C4)N5CCNCC5).Cl
14030	785	-0.282569	FALSE	TRUE	TRUE	ISOXSUPRINE HYDROCHLORIDE	vasodilator	Cl.CC(COC1=CC=CC=C1)NC(C)[C@H](O)C1=CC=C(O)C=C1
14030	772	-0.282398	FALSE	TRUE	TRUE	QUININE	antimalarial, skeletal muscle relaxant	COC1=CC2=C(C=CN=C2C=C1)[C@@H](O)[C@H]1C[C@@H]2CC[N@]1C[C@@H]2C=C
14030	732	-0.277435	FALSE	TRUE	TRUE	ESTRADIOL CYPIONATE	estrogen	C[C@]12CCC3C(CCC4=C3C=CC(O)=C4)C1CC[C@@H]2OC(=O)CCC1CCCC1
14030	703	-0.276404	FALSE	TRUE	TRUE	DEXTROMETHORPHAN HYDROBROMIDE	antitussive	Br.COC1=CC=C2C[C@H]3[C@H]4CCCC[C@@]4(CCN3C)C2=C1
TM-L4	752	-0.275294	FALSE	TRUE	TRUE	Ruxolitinib (INCB-18424) phosphate	Ruxolitinib phosphate(INCB018424 phosphate) is the first potent, selective, JAK1/2 inhibitor to enter the clinic with IC50 of 3.3 nM/2.8 nM, >130-fold selectivity for JAK1/2 versus JAK3.	OP(O)(O)=O.N#CC[C@H](C1CCCC1)n1cc(cn1)-c1ncnc2[nH]ccc12
TM-L4	743	-0.258074	FALSE	TRUE	TRUE	Cidofovir	Cidofovir inhibits virus replication by specific inhibition of viral DNA synthesis.	C(P(=O)(O)O)O[C@@H](Cn1c(=O)nc(cc1)N)CO
L2300	695	-0.255226	FALSE	TRUE	TRUE	EX 527	EX 527 is a potent and selective SIRT1 inhibitor with IC50 of 38 nM.	N1C2=C(C3=C1C=CC(=C3)Cl)CCCC2C(=O)N
LOPAC	776	-0.2545	FALSE	TRUE	TRUE	Tyrphostin AG 835	Protein tyrosine kinase inhibitor	C[C@H](NC(=O)C(=C\C1=CC(O)=C(O)C=C1)\C#N)C1=CC=CC=C1
14030	721	-0.254431	FALSE	TRUE	TRUE	NIPECOTIC ACID	GABA uptake inhibitor	OC(=O)C1CCCNC1
14030	606	-0.25298	FALSE	TRUE	TRUE	PHENACEMIDE	anticonvulsant	NC(=O)NC(=O)CC1=CC=CC=C1
14030	790	-0.25168	FALSE	TRUE	TRUE	MEBHYDROLIN	H1 antihistamine	CN1CCC2=C(C1)C1=CC=CC=C1N2CC1=CC=CC=C1
14030	661	-0.248625	FALSE	TRUE	TRUE	SALSALATE	analgesic	OC(=O)C1=C(OC(=O)C2=CC=CC=C2O)C=CC=C1
LOPAC	778	-0.245346	FALSE	TRUE	TRUE	Riluzole	Glutamate release inhibitor; anticonvulsant	NC1=NC2=C(S1)C=C(OC(F)(F)F)C=C2
L1900	797	-0.244658	FALSE	TRUE	TRUE	Tranylcypromine (2-PCPA) HCl	Tranylcypromine is a monoamine oxidase inhibitor, which inhibits CYP2A6 with Ki of 0.08 μM and 0.2 μM in cDNA-expressing microsomes and Human Liver Microsomes, respectively.	Cl.C1=CC=CC(=C1)[C@@H]2[C@H](C2)N
TM-L4	754	-0.242755	FALSE	TRUE	TRUE	SHAM CONTROL	SHAM CONTROL	SHAM CONTROL
TM-L4	745	-0.238356	FALSE	TRUE	TRUE	Mifepristone	Mifepristone is a Progestin Antagonist. The mechanism of action of mifepristone is as a Progestational Hormone Receptor Antagonist.	CC#C[C@]1(O)CC[C@H]2[C@@H]3CCC4=CC(=O)CCC4=C3[C@H](C[C@]12C)c1ccc(cc1)N(C)C
14030	607	-0.23598	FALSE	TRUE	TRUE	ACETYLCYSTEINE	mucolytic	CC(=O)NC(CS)C(O)=O
14030	711	-0.235606	FALSE	TRUE	TRUE	CICLOPIROX OLAMINE	antifungal	NCCO.CC1=CC(=O)N(O)C(=C1)C1CCCCC1
TM-L4	719	-0.233782	FALSE	TRUE	TRUE	Tenofovir alafenamide fumarate	Tenofovir alafenamide fumarate (TAF) is an oral phosphonoamidate prodrug of the HIV reverse transcriptase nucleotide inhibitor tenofovir (TFV)	OC(=O)\C=C\C(O)=O.CC(C)OC(=O)[C@H](C)N[P@](=O)(CO[C@H](C)Cn1cnc2c(N)ncnc12)Oc1ccccc1.CC(C)OC(=O)[C@H](C)N[P@](=O)(CO[C@H](C)Cn1cnc2c(N)ncnc12)Oc1ccccc1
14030	938	-0.232358	FALSE	TRUE	TRUE	SPARTEINE SULFATE	oxytocic	OS(O)(=O)=O.C1CCN2C[C@H]3C[C@@H](CN4CCCC[C@H]34)[C@@H]2C1
14030	902	-0.231716	FALSE	TRUE	TRUE	DIGITOXIN	inotropic, cardiotonic	C[C@H]1O[C@H](C[C@H](O)[C@@H]1O)O[C@H]1[C@@H](O)C[C@H](O[C@H]2[C@@H](O)C[C@H](O[C@H]3CC[C@@]4(C)[C@H](CCC5C4CC[C@]4(C)[C@H](CC[C@]54O)C4=CC(=O)OC4)C3)O[C@@H]2C)O[C@@H]1C
14030	705	-0.228457	FALSE	TRUE	TRUE	AMOXAPINE	antidepressant, inhibits norepinephrine uptake	ClC1=CC2=C(OC3=C(C=CC=C3)N=C2N2CCNCC2)C=C1
L2300	641	-0.227356	FALSE	TRUE	TRUE	CEP33779	CEP33779 is a selective JAK2 inhibitor with IC50 of 1.8 nM.	C1(=CC=CC(=C1)NC2N=C3N(N=2)C=CC=C3C4=CC=C(C=C4)S(=O)(C)=O)N5CCN(CC5)C
14030	809	-0.224232	FALSE	TRUE	TRUE	CHLORAZANIL HYDROCHLORIDE	diuretic	Cl.CC1=NC=NC(NC2=CC=C(Cl)C=C2)=N1
14030	511	-0.222236	FALSE	TRUE	TRUE	PICROPODOPHYLLIN	Insulin growth factor 1 receptor inhibitor, antineoplastic	COC1=CC(=CC(OC)=C1OC)[C@H]1[C@H]2[C@H](COC2=O)[C@@H](O)C2=CC3=C(OCO3)C=C12
14030	689	-0.221498	FALSE	TRUE	TRUE	QUINIDINE GLUCONATE	antiarrhythmic, antimalarial	OC[C@@H](O)[C@@H](O)[C@H](O)[C@@H](O)C(O)=O.COC1=CC2=C(C=CN=C2C=C1)[C@H](O)[C@H]1C[C@@H]2CC[N@]1C[C@@H]2C=C
14030	666	-0.215432	FALSE	TRUE	TRUE	MELPHALAN	antineoplastic, alkylating agent	N[C@@H](CC1=CC=C(C=C1)N(CCCl)CCCl)C(O)=O
14030	879	-0.214769	FALSE	TRUE	TRUE	ACETYLCHOLINE CHLORIDE	cholinergic, antiarrhythmic, miotic, vasodilator (peripheral)	[Cl-].CC(=O)OCC[N+](C)(C)C
L2300	842	-0.214038	FALSE	TRUE	TRUE	Rapamycin (Sirolimus)	Rapamycin (Sirolimus, AY-22989, WY-090217) is a specific mTOR inhibitor with IC50 of ~0.1 nM.	[C@@H]1([C@@H](C[C@@H](CC1)C[C@H]([C@@H]2CC([C@@H](/C=C(\C)[C@H]([C@@H](C([C@@H](C[C@@H](/C=C/C=C/C=C(/[C@H](C[C@@H]3CC[C@H]([C@](C(C(N4CCCC[C@@H](C(O2)=O)4)=O)=O)(O3)O)C)OC)C)C)C)=O)OC)O)C)=O)C)OC)O
14030	781	-0.213759	FALSE	TRUE	TRUE	APIGENIN DIMETHYL ETHER		COC1=CC=C(C=C1)C1=CC(=O)C2=C(O)C=C(OC)C=C2O1
LOPAC	832	-0.212384	FALSE	TRUE	TRUE	Ruthenium red	Inhibits mitchondrial Ca2+ uniporter; capsaicin antagonist	[Cl-].[Cl-].[Cl-].[Cl-].[Cl-].[Cl-].[NH3+][Ru]([NH3+])([NH3+])([NH3+])([NH3+])O[Ru]([NH3+])([NH3+])([NH3+])([NH3+])O[Ru]([NH3+])([NH3+])([NH3+])([NH3+])[NH3+]
LOPAC	675	-0.209499	FALSE	TRUE	TRUE	KRM-III	KRM-III is an inhibitor of T cell antigen receptor (TCR), an inhibitor of phorbol myristate acetate (PMA) /ionomycin-induced nuclear factor of activated T cells (NFAT) activation and T cell proliferation.	S=C1NC(=CN1C1=CC=CC=C1)C1=CC=CC=C1
LOPAC	732	-0.207955	FALSE	TRUE	TRUE	MG 624	Nicotinic acetylcholine receptor antagonist; selectively inhibits alpha-bungarotoxin sensitive receptors that contain the alpha7 subunit	[I-].CC[N+](CC)(CC)CCOC1=CC=C(\C=C\C2=CC=CC=C2)C=C1
14030	937	-0.200931	FALSE	TRUE	TRUE	NOREPINEPHRINE	adrenergic agonist, antihypotensive	NC[C@H](O)C1=CC=C(O)C(O)=C1
14030	792	-0.200579	FALSE	TRUE	TRUE	FLORFENICOL	antibacterial	CS(=O)(=O)C1=CC=C(C=C1)C(O)[C@H](CF)NC(=O)C(Cl)Cl
14030	858	-0.19753	FALSE	TRUE	TRUE	SAPPANONE A DIMETHYL ETHER		COC1=CC=C2C(=O)\C(COC2=C1)=C\C1=CC=C(OC)C(O)=C1
14030	601	-0.196298	FALSE	TRUE	TRUE	HETACILLIN POTASSIUM	antibacterial	[K+].CC1(C)S[C@@H]2C(N3C(=O)[C@H](NC3(C)C)C3=CC=CC=C3)C(=O)N2[C@H]1C([O-])=O
14030	720	-0.193301	FALSE	TRUE	TRUE	RIBOSTAMYCIN SULFATE	antibacterial	OS(O)(=O)=O.NC[C@H]1O[C@H](O[C@@H]2[C@@H](N)C[C@@H](N)[C@H](O)C2O[C@@H]2O[C@H](CO)[C@@H](O)[C@H]2O)[C@H](N)[C@@H](O)[C@@H]1O
14030	914	-0.191841	FALSE	TRUE	TRUE	CYTARABINE	antineoplastic, antiviral, antimetabolite	NC1=NC(=O)N(C=C1)C1O[C@H](CO)[C@@H](O)[C@@H]1O
L1200	874	-0.187821	FALSE	TRUE	TRUE	PIK-93	PIK-93 is the first potent, synthetic PI4K (PI4KIIIβ) inhibitor with IC50 of 19 nM; shown to inhibit PI3Kα with IC50 of 39 nM.	C1(=C(C=C(C=C1)C2SC(=NC=2C)NC(C)=O)S(=O)(=O)NCCO)Cl
14030	765	-0.18574	FALSE	TRUE	TRUE	CARPROFEN	antiinflammatory, analgesic	CC(C(O)=O)C1=CC2=C(C=C1)C1=CC(Cl)=CC=C1N2
L2300	792	-0.185148	FALSE	TRUE	TRUE	GDC-0879	GDC-0879 is a novel potent, selective B-Raf inhibitor for B-RafV600E with IC50 of 0.13 nM.	C(CN1N=C(C(=C1)C2=CC=C3C(=C2)CCC/3=N/O)C4C=CN=CC=4)O
14030	666	-0.184555	FALSE	TRUE	TRUE	DIGITOXIN	inotropic, cardiotonic	C[C@H]1O[C@H](C[C@H](O)[C@@H]1O)O[C@H]1[C@@H](O)C[C@H](O[C@H]2[C@@H](O)C[C@H](O[C@H]3CC[C@@]4(C)[C@H](CCC5C4CC[C@]4(C)[C@H](CC[C@]54O)C4=CC(=O)OC4)C3)O[C@@H]2C)O[C@@H]1C
TM-L4	759	-0.174892	FALSE	TRUE	TRUE	Salbutamol	Albuterol stimulates beta2-adrenergic receptors in the lungs, thereby activating the enzyme adenylate cyclase that catalyzes the conversion of ATP to cyclic-3', 5'-adenosine monophosphate (cAMP). Albuterol Sulfate is the sulfate salt of the short-acting sympathomimetic agent albuterol, a 1:1 racemic mixture of (R)-albuterol and (S)-albuterol with bronchodilator activity. Increased cAMP concentrat…	CC(C)(C)NCC(O)c1cc(CO)c(O)cc1
TM-L4	650	-0.174014	FALSE	TRUE	TRUE	Tolmetin	Tolmetin is a Nonsteroidal Anti-inflammatory Drug. The mechanism of action of tolmetin is as a Cyclooxygenase Inhibitor. The chemical classification of tolmetin is Nonsteroidal Anti-inflammatory Compounds.	O=C(O)Cc1ccc(C(=O)c2ccc(C)cc2)n1C
14030	747	-0.172667	FALSE	TRUE	TRUE	DACTINOMYCIN	antineoplastic, intercalating agent	CC(C)C1NC(=O)C(NC(=O)C(C(C)C)N(C)C(=O)CN(C)C(=O)C2CCCN2C1=O)C(C)OC(=O)C1=C2N=C3C(OC2=C(C)C=C1)=C(C)C(=O)C(N)=C3C(=O)OC(C)C1NC(=O)C(C(C)C)N(C)C(=O)CN(C)C(=O)C2CCCN2C(=O)C(NC1=O)C(C)C
14030	737	-0.172031	FALSE	TRUE	TRUE	CHLOROQUINE DIPHOSPHATE	antimalarial, antiamebic, antirheumatic, intercalating agent	OP(O)(O)=O.OP(O)(O)=O.CCN(CC)CCCC(C)NC1=C2C=CC(Cl)=CC2=NC=C1
TM-L4	753	-0.171236	FALSE	TRUE	TRUE	S-Ruxolitinib	Ruxolitinib S enantiomer is the S-enantiomer of Ruxolitinib. Ruxolitinib is the first potent, selective JAK1/2 inhibitor.	N#CC[C@@H](C1CCCC1)n1cc(cn1)-c1ncnc2[nH]ccc12
LOPAC	672	-0.168937	FALSE	TRUE	TRUE	Pyrocatechol	Carcinogen; causes DNA strand breakage	OC1=C(O)C=CC=C1
TM-L4	818	-0.16707	FALSE	TRUE	TRUE	Niraparib tosylate	MK-4827(Niraparib) tosylate (with IC50 of 3.8 nM/2.1 nM) is a selective PARP1/PARP2 inhibitor.	Cc1ccc(cc1)S(=O)(=O)O.NC(=O)c1cccc2cn(nc12)c1ccc(cc1)[C@@H]1CCCNC1
14030	677	-0.162651	FALSE	TRUE	TRUE	CLONIDINE HYDROCHLORIDE	antihypertensive	Cl.ClC1=CC=CC(Cl)=C1N=C1NCCN1
14030	710	-0.16227	FALSE	TRUE	TRUE	METARAMINOL BITARTRATE	antihypotensive	O[C@H]([C@@H](O)C(O)=O)C(O)=O.C[C@H](N)[C@H](O)C1=CC=CC(O)=C1
14030	727	-0.160605	FALSE	TRUE	TRUE	6,7-DICHLORO-3-HYDROXY-2-QUINOXALINECARBOXYLIC ACID	NMDA and kainate receptor antagonist	OC(=O)C1=NC2=CC(Cl)=C(Cl)C=C2N=C1O
14030	743	-0.15921	FALSE	TRUE	TRUE	PREDNISOLONE HEMISUCCINATE	antiinflammatory, glucocorticoid	C[C@]12C[C@H](O)C3C(CCC4=CC(=O)C=C[C@]34C)C1CC[C@]2(O)C(=O)COC(=O)CCC(O)=O
TM-L4	770	-0.155769	FALSE	TRUE	TRUE	(S)-(+)-Ketoprofen	Dexketoprofen works by blocking the action of a substance in the body called cyclo-oxygenase. It belongs to a class of medicines called non-steroidal anti-inflammatory drugs (NSAIDs). Cyclo-oxygenase is involved in the production of chemicals in the body called prostaglandins. Prostaglandins are produced in response to injury or certain diseases and would otherwise go on to cause swelling, inflam…	C[C@H](C(=O)O)c1cccc(c1)C(=O)c1ccccc1
L1200	802	-0.154219	FALSE	TRUE	TRUE	Quizartinib (AC220)	Quizartinib (AC220) is a second-generation FLT3 inhibitor for Flt3(ITD/WT) with IC50 of 1.1 nM/4.2 nM, 10-fold more selective for Flt3 than KIT, PDGFRα, PDGFRβ, RET, and CSF-1R. Phase 1/2.	C1=C(C=CC(=C1)C2N=C3N(C=2)C4C(S3)=CC(=CC=4)OCCN5CCOCC5)NC(NC6C=C(ON=6)C(C)(C)C)=O
14030	762	-0.149439	FALSE	TRUE	TRUE	EPICATECHIN PENTAACETATE		CC(=O)O[C@@H]1CC2=C(OC(C)=O)C=C(OC(C)=O)C=C2O[C@@H]1C1=CC=C(OC(C)=O)C(OC(C)=O)=C1
L1900	778	-0.147682	FALSE	TRUE	TRUE	SHAM CONTROL	SHAM CONTROL	SHAM CONTROL
14030	736	-0.146398	FALSE	TRUE	TRUE	SULFASALAZINE	anticolitis and Crohn's disease	OC(=O)C1=CC(=CC=C1O)\N=N\C1=CC=C(C=C1)S(=O)(=O)NC1=CC=CC=N1
14030	700	-0.145899	FALSE	TRUE	TRUE	CHLORINDANOL	antiseptic, spermaticide	OC1=C2CCCC2=C(Cl)C=C1
14030	783	-0.141414	FALSE	TRUE	TRUE	ORNITHINE HYDROCHLORIDE	hepatoprotectant, anticholesteremic	Cl.NCCCC(N)C(O)=O
L1200	935	-0.138293	FALSE	TRUE	TRUE	A-674563	A-674563 is an Akt1 inhibitor with Ki of 11 nM, modest potent to PKA and >30-fold selective for Akt1 over PKC.	C1=CC=CC(=C1)C[C@@H](COC2=CC(=CN=C2)C3=CC4=C(C=C3)NN=C4C)N
LOPAC	740	-0.136015	FALSE	TRUE	TRUE	CNS-1102	Noncompetitive NMDA glutamate receptor antagonist.	Cl.CCC1=CC(=CC=C1)N(C)C(=N)NC1=CC=CC2=C1C=CC=C2
L2300	819	-0.134346	FALSE	TRUE	TRUE	Dacomitinib (PF299804, PF-00299804)	PF299804 is a potent, irreversible pan-ErbB inhibitor against ErbB1, ErbB2 and ErbB4 with IC50 of 6 nM, 45.7 nM and 73.7 nM, respectively.	C(/C=C/C(NC1=C(C=C2C(=C1)C(=NC=N2)NC3=CC(=C(C=C3)F)Cl)OC)=O)N4CCCCC4
TM-L4	687	-0.133405	FALSE	TRUE	TRUE	Clemastine fumarate	Clemastine Fumarate is a synthetic ethanolamine with anticholinergic, sedative, and histamine H1 antagonistic properties.	C[C@@](c1ccccc1)(c1ccc(cc1)Cl)OCC[C@H]1CCCN1C.C(=C\C(=O)O)/C(=O)O
LOPAC	790	-0.128305	FALSE	TRUE	TRUE	10058-F4	Inhibits c-Myc-Max interaction and prevents transactivation of c-Myc target gene expression.	CCC1=CC=C(\C=C2\SC(=S)NC2=O)C=C1
L2300	692	-0.127643	FALSE	TRUE	TRUE	PD 0332991 HCl	PD 0332991 is a highly selective inhibitor of CDK4/cyclin D1 and CDK6/cyclin D2 with IC50 of 11 nM and 16 nM, respectively.	N1(=C(N=C2C(=C1)C(=C(C(N2C3CCCC3)=O)C(C)=O)C)NC4=NC=C(C=C4)N5CCNCC5).Cl
TM-L4	658	-0.125968	FALSE	TRUE	TRUE	Flurbiprofen Axetil	Flurbiprofen Axetil is an anti-inflammatory used as an analgesic.	CC(OC(C)=O)OC(=O)C(C)c1ccc(c(F)c1)-c1ccccc1
L1200	794	-0.124308	FALSE	TRUE	TRUE	PD98059	PD98059 is a non-ATP competitive MEK inhibitor with IC50 of 2 μM, specifically inhibits MEK-1-mediated activation of MAPK; does not directly inhibit ERK1 or ERK2.	C1=CC=C2C(=C1)C(C=C(O2)C3=CC=CC(=C3N)OC)=O
14030	763	-0.123335	FALSE	TRUE	TRUE	SALICIN	analgesic, antipyretic	OC[C@H]1O[C@@H](OC2=C(CO)C=CC=C2)[C@H](O)[C@@H](O)[C@@H]1O
14030	575	-0.12295	FALSE	TRUE	TRUE	FUSIDIC ACID	antibacterial	C[C@@H]1[C@H](O)CC[C@@]2(C)[C@H]1CC[C@@]1(C)C2[C@H](O)C[C@H]2\C([C@H](C[C@]12C)OC(C)=O)=C(\CCC=C(C)C)C(O)=O
14030	582	-0.121318	FALSE	TRUE	TRUE	ANTHRALIN	antipsoriatic	OC1=CC=CC2=C1C(=O)C1=C(C2)C=CC=C1O
LOPAC	831	-0.119591	FALSE	TRUE	TRUE	NU2058	Selective cyclin-dependent kinase-2 (CDK2) inhibitor. .	NC1=NC(OCC2CCCCC2)=C2N=CNC2=N1
LOPAC	739	-0.118313	FALSE	TRUE	TRUE	Ganaxolone	Positive allosteric modulator of GABA-A receptors	CC(=O)[C@H]1CC[C@H]2[C@@H]3CC[C@H]4C[C@](C)(O)CC[C@]4(C)[C@H]3CC[C@]12C
LOPAC	740	-0.118313	FALSE	TRUE	TRUE	Guanabenz acetate	Centrally acting alpha2 adrenoceptor agonist; antihypertensive	CC(O)=O.NC(=N)N\N=C\C1=C(Cl)C=CC=C1Cl
14030	823	-0.114979	FALSE	TRUE	TRUE	PROMAZINE HYDROCHLORIDE	antipsychotic	Cl.CN(C)CCCN1C2=C(SC3=C1C=CC=C3)C=CC=C2
L1200	797	-0.111674	FALSE	TRUE	TRUE	PD318088	PD318088 is a non-ATP competitive allosteric MEK1/2 inhibitor, binds simultaneously with ATP in a region of the MEK1 active site that is adjacent to the ATP-binding site.	C1=C(C(=C(C(=C1C(NOCC(CO)O)=O)NC2=CC=C(C=C2F)I)F)F)Br
14030	660	-0.110799	FALSE	TRUE	TRUE	QUINAPRIL HYDROCHLORIDE	antihypertensive, ACE inhibitor	Cl.CCOC(=O)[C@H](CCC1=CC=CC=C1)N[C@@H](C)C(=O)N1CC2=CC=CC=C2C[C@H]1C(O)=O
LOPAC	749	-0.11046	FALSE	TRUE	TRUE	(+)-Quisqualic acid	Active enantiomer of quisqualic acid; excitatory amino acid at glutamate receptors; anthelmentic agent	N[C@@H](CN1OC(=O)NC1=O)C(O)=O
14030	906	-0.109687	FALSE	TRUE	TRUE	PROCYCLIDINE HYDROCHLORIDE	anticholinergic	Cl.OC(CCN1CCCC1)(C1CCCCC1)C1=CC=CC=C1
LOPAC	798	-0.109656	FALSE	TRUE	TRUE	R(+)-6-Bromo-APB hydrobromide	D1 Dopamine receptor agonist	Br.OC1=CC2=C(CCN(CC=C)C[C@@H]2C2=CC=CC=C2)C(Br)=C1O
14030	794	-0.109347	FALSE	TRUE	TRUE	CHLORALOSE	anesthetic	OCC(O)[C@H]1O[C@@H]2O[C@@H](O[C@@H]2[C@H]1O)C(Cl)(Cl)Cl
LOPAC	798	-0.104903	FALSE	TRUE	TRUE	6(5H)-Phenanthridinone	Poly(ADP-ribose) Polymerase (PARP) inhibitor	O=C1NC2=C(C=CC=C2)C2=CC=CC=C12
LOPAC	733	-0.102686	FALSE	TRUE	TRUE	1,10-Phenanthroline monohydrate	Metalloprotease inhibitor; chelates iron, zinc and other divalent metals	C1=CC2=CC=C3C=CC=NC3=C2N=C1
14030	790	-0.102299	FALSE	TRUE	TRUE	METAPROTERENOL	bronchodilator	CC(C)NCC(O)C1=CC(O)=CC(O)=C1
L2300	796	-0.0999051	FALSE	TRUE	TRUE	Neratinib (HKI-272)	Neratinib (HKI-272) is a highly selective HER2 and EGFR inhibitor with IC50 of 59 nM and 92 nM, respectively.	C1(=C(C=C2C(=C1)N=CC(=C2NC3=CC=C(C(=C3)Cl)OCC4=NC=CC=C4)C#N)NC(/C=C/CN(C)C)=O)OCC
14030	733	-0.0993941	FALSE	TRUE	TRUE	ETHYL VANILLIN	flavoring agent	CCOC1=C(O)C=CC(C=O)=C1
14030	703	-0.0963357	FALSE	TRUE	TRUE	IMIPRAMINE HYDROCHLORIDE	antidepressant	Cl.CN(C)CCCN1C2=C(CCC3=C1C=CC=C3)C=CC=C2
14030	947	-0.0935321	FALSE	TRUE	TRUE	CLOMIPHENE CITRATE	gonad stimulating principle	OC(=O)CC(O)(CC(O)=O)C(O)=O.CCN(CC)CCOC1=CC=C(C=C1)C(=C(/Cl)C1=CC=CC=C1)\C1=CC=CC=C1
L1200	742	-0.0889668	FALSE	TRUE	TRUE	Indirubin	Indirubin is a potent cyclin-dependent kinases and GSK-3β inhibitor with IC50 of about 5 &mu;M and 0.6 &mu;M.	C1=CC=C2C(=C1)NC(C/2=C3\NC4=C(C3=O)C=CC=C4)=O
TM-L4	720	-0.0888885	FALSE	TRUE	TRUE	Ciclopirox	Ciclopirox exerts its action by binding to and chelating trivalent cations, such as Fe3+ and Al3+, thereby inhibiting the availability of essential co-factors for enzymes. Ciclopirox is a synthetic, broad-spectrum antifungal agent with additional antibacterial and anti-inflammatory activities. This may lead to a loss of activity of enzymes that are essential for cellular metabolism, the organizat…	Cc1cc(=O)n(O)c(c1)C1CCCCC1
14030	665	-0.087578	FALSE	TRUE	TRUE	BUSULFAN	antineoplastic, alkylating agent	CS(=O)(=O)OCCCCOS(C)(=O)=O
14030	825	-0.0829537	FALSE	TRUE	TRUE	CLOXYQUIN	antibacterial, antifungal	OC1=CC=C(Cl)C2=CC=CN=C12
LOPAC	777	-0.0809108	FALSE	TRUE	TRUE	4-Hydroxyphenethylamine hydrochloride	Dopamine receptor agonist	Cl.NCCC1=CC=C(O)C=C1
14030	934	-0.075135	FALSE	TRUE	TRUE	CINOXACIN	antibacterial	CCN1N=C(C(O)=O)C(=O)C2=CC3=C(OCO3)C=C12
L2300	760	-0.0747423	FALSE	TRUE	TRUE	SHAM CONTROL	SHAM CONTROL	SHAM CONTROL
L1200	745	-0.0713706	FALSE	TRUE	TRUE	PD0325901	PD0325901 (PD325901) is selective and non ATP-competitive MEK inhibitor with IC50 of 0.33 nM, roughly 500-fold more potent than CI-1040 on phosphorylation of ERK1 and ERK2. Phase 1/2.	C1=CC(=C(C(=C1C(=O)NOC[C@H](O)CO)NC2=CC=C(C=C2F)I)F)F
14030	862	-0.0682666	FALSE	TRUE	TRUE	METHSCOPOLAMINE BROMIDE	anticholinergic	[Br-].C[N+]1(C)C2CC(CC1C1OC21)OC(=O)[C@@H](CO)C1=CC=CC=C1
L2300	594	-0.0667271	FALSE	TRUE	TRUE	KX2-391	KX2-391 (KX01) is a highly selective non ATP-competitive Src inhibitor with GI50 of 9-60 nM in cancer cell lines .	C1=C(C=CC(=C1)C2=CC=C(N=C2)CC(NCC3=CC=CC=C3)=O)OCCN4CCOCC4
L1200	794	-0.0606438	FALSE	TRUE	TRUE	GSK1059615	GSK1059615 is a dual inhibitor of PI3Kα/β/δ/γ (reversible) and mTOR with IC50 of 0.4 nM/0.6 nM/2 nM/5 nM and 12 nM, respectively. Phase 1.	C1(=CC=C2C(=C1)C(=CC=N2)C3=CC=NC=C3)/C=C4/C(NC(S4)=O)=O
14030	702	-0.057221	FALSE	TRUE	TRUE	METOPROLOL TARTRATE	antihypertensive, antianginal	OC(C(O)C(O)=O)C(O)=O.COCCC1=CC=C(OCC(O)CNC(C)C)C=C1
14030	740	-0.0538504	FALSE	TRUE	TRUE	IMIPENEM	antibacterial	O.C[C@@H](O)[C@@H]1[C@H]2CC(SCCNC=N)=C(N2C1=O)C(O)=O
14030	679	-0.0527766	FALSE	TRUE	TRUE	DERACOXIB	antiinflammatory, antiarthritic, COX-2 inhibitor	COC1=C(F)C=C(C=C1)C1=CC(=NN1C1=CC=C(C=C1)S(N)(=O)=O)C(F)F
TM-L4	782	-0.052588	FALSE	TRUE	TRUE	Tofacitinib	Tofacitinib is an oral, small molecule inhibitor of Janus kinases that is used to treat moderate-to-severe rheumatoid arthritis.	[C@@H]1([C@H](CN(CC1)C(=O)CC#N)N(c1ncnc2[nH]ccc12)C)C
L2300	852	-0.0524237	FALSE	TRUE	TRUE	PF-3845	PF-3845 is a potent, selective and irreversible FAAH inhibitor with Ki of 230 nM.	C1(=CN=C(C=C1)OC2=CC(=CC=C2)CC3CCN(CC3)C(NC4=CN=CC=C4)=O)C(F)(F)F
L1200	832	-0.0481464	FALSE	TRUE	TRUE	ZSTK474	ZSTK474 inhibits class I PI3Kisoforms with IC50 of 37 nM, mostly PI3Kδ.	N1=C(N=C(N=C1N2CCOCC2)N3C4=C(N=C3C(F)F)C=CC=C4)N5CCOCC5
14030	763	-0.0477818	FALSE	TRUE	TRUE	BENURESTAT	urease inhibitor	ONC(=O)CNC(=O)C1=CC=C(Cl)C=C1
TM-L4	761	-0.0474454	FALSE	TRUE	TRUE	Fluvastatin sodium salt	Fluvastatin sodium, a competitive inhibitor of hydroxymethylglutaryl-coenzyme A reductase (HMGCR), is a commonly used cholesterol lowering agent.	[Na+].CC(C)n1c(\C=C\[C@@H](O)C[C@@H](O)CC([O-])=O)c(-c2ccc(F)cc2)c2ccccc12
TM-L4	679	-0.0466871	FALSE	TRUE	TRUE	Trimeprazine tartrate	Trimeprazine tartrate is aphenothiazine derivative that is used as an antipruritic. It also acts as a sedative, hypnotic, and antiemetic for prevention of motion sickness.	O[C@H]([C@@H](O)C(O)=O)C(O)=O.CC(CN(C)C)CN1c2ccccc2Sc2ccccc12.CC(CN(C)C)CN1c2ccccc2Sc2ccccc12
L1200	786	-0.0333659	FALSE	TRUE	TRUE	PF-04217903	PF-04217903 is a selective ATP-competitive c-Met inhibitor with IC50 of 4.8 nM, susceptible to oncogenic mutations (no activity to Y1230C mutant). Phase 1.	C12=CC=CN=C1C=CC(=C2)CN3C4=C(N=N3)N=CC(=N4)C5=CN(N=C5)CCO
TM-L4	687	-0.0314593	FALSE	TRUE	TRUE	Acebutolol hydrochloride	Acebutolol acts as a cardioselective beta-adrenergic antagonist with little effect on bronchial receptors and has intrinsic sympathomimetic properties. Acebutolol Hydrochloride is the hydrochloride salt form of acebutolol, a synthetic butyranilide derivative with hypotensive and antiarrhythmic activity. Having stabilizing and quinidine-like effects on cardiac rhythm, Acebutolol is used in ventric…	Cl.CCCC(=O)Nc1cc(C(=O)C)c(OCC(O)CNC(C)C)cc1
LOPAC	835	-0.0274828	FALSE	TRUE	TRUE	Urapidil, 5-Methyl-	Selective alpha1A adrenoceptor antagonist; antihypertensive	COC1=C(C=CC=C1)N1CCN(CCCNC2=C(C)C(=O)N(C)C(=O)N2C)CC1
LOPAC	782	-0.0273802	FALSE	TRUE	TRUE	(-)-Isoproterenol hydrochloride	beta-Adrenoceptor agonist; increases cytosolic cAMP	Cl.CC(C)NC[C@H](O)C1=CC=C(O)C(O)=C1
LOPAC	839	-0.0248948	FALSE	TRUE	TRUE	Phenylephrine hydrochloride	alpha1 Adrenoceptor agonist; mydriatic; decongestant	Cl.CNC[C@H](O)C1=CC=CC(O)=C1
14030	734	-0.0216638	FALSE	TRUE	TRUE	XYLAZINE	analgesic	CC1=CC=CC(C)=C1NC1=NCCCS1
L1200	823	-0.0204126	FALSE	TRUE	TRUE	CP-724714	CP-724,714 is a potent, selective inhibitor of HER2/ErbB2 with IC50 of 10 nM, >640-fold selectivity against EGFR, InsR, IRG-1R, PDGFR, VEGFR2, Abl, Src, c-Met etc. Phase 2.	C1(=CC=C2C(=C1)C(=NC=N2)NC3=CC=C(C(=C3)C)OC4=CC=C(N=C4)C)/C=C/CNC(COC)=O
LOPAC	628	-0.017012	FALSE	TRUE	TRUE	5-Carboxamidotryptamine maleate	5-HT7 Serotonin receptor agonist	OC(=O)\C=C/C(O)=O.NCCC1=CNC2=C1C=C(C=C2)C(N)=O
14030	862	-0.0160472	FALSE	TRUE	TRUE	CARBINOXAMINE MALEATE	antihistaminic	OC(=O)\C=C/C(O)=O.CN(C)CCOC(C1=CC=C(Cl)C=C1)C1=CC=CC=N1
14030	950	-0.0149759	FALSE	TRUE	TRUE	FLUMETHAZONE PIVALATE	glucocorticoid, antiinflammatory	C[C@@H]1CC2C3C[C@H](F)C4=CC(=O)C=C[C@]4(C)[C@@]3(F)[C@@H](O)C[C@]2(C)[C@@]1(O)C(=O)COC(=O)C(C)(C)C
LOPAC	779	-0.0101873	FALSE	TRUE	TRUE	Tetracaine hydrochloride	Local anesthetic	Cl.CCCCNC1=CC=C(C=C1)C(=O)OCCN(C)C
TM-L4	817	-0.0100774	FALSE	TRUE	TRUE	Pitavastatin calcium	Pitavastatin is a potent inhibitor of HMG-CoA reductase (Ki: 1.7 nM). It lowers both total cholesterol and low-density lipoprotein cholesterol in animals and humans. Metabolism of pitavastatin by the cytochrome P450 system is minimal, reducing the risk of drug-drug interactions.	[Ca++].O[C@H](C[C@H](O)\C=C\c1c(nc2ccccc2c1-c1ccc(F)cc1)C1CC1)CC([O-])=O.O[C@H](C[C@H](O)\C=C\c1c(nc2ccccc2c1-c1ccc(F)cc1)C1CC1)CC([O-])=O
14030	799	-0.00998771	FALSE	TRUE	TRUE	HELENINE	anthelmintic, antibacterial, antineoplastic	C[C@H]1CCC[C@]2(C)C[C@H]3OC(=O)C(=C)[C@H]3C=C12
14030	889	-0.00708756	FALSE	TRUE	TRUE	OXYBENZONE	ultraviolet screen	COC1=CC(O)=C(C=C1)C(=O)C1=CC=CC=C1
LOPAC	652	-0.00556261	FALSE	TRUE	TRUE	(S)-(+)-Camptothecin	DNA topoisomerase I inhibitor	CC[C@@]1(O)C(=O)OCC2=C1C=C1N(CC3=CC4=CC=CC=C4N=C13)C2=O
14030	703	-0.00524049	FALSE	TRUE	TRUE	DIPHENYLPYRALINE HYDROCHLORIDE	antihistaminic	Cl.CN1CCC(CC1)OC(C1=CC=CC=C1)C1=CC=CC=C1
L1900	762	-0.00507913	FALSE	TRUE	TRUE	SHAM CONTROL	SHAM CONTROL	SHAM CONTROL
14030	808	0.00216485	FALSE	TRUE	TRUE	NIFLUMIC ACID	analgesic, antiinflammatory	OC(=O)C1=C(NC2=CC=CC(=C2)C(F)(F)F)N=CC=C1
14030	767	0.00325178	FALSE	TRUE	TRUE	PROSCILLARIDIN A	cardiotonic	C[C@@H]1O[C@@H](O[C@H]2CC[C@]3(C)C4CC[C@]5(C)[C@H](CC[C@]5(O)C4CCC3=C2)C2=COC(=O)C=C2)C(O)C(O)[C@H]1O
L2300	725	0.00372948	FALSE	TRUE	TRUE	SHAM CONTROL	SHAM CONTROL	SHAM CONTROL
LOPAC	716	0.00565051	FALSE	TRUE	TRUE	Harmane	I1 imidazoline binding site agonist	CC1=NC=CC2=C1NC1=CC=CC=C21
LOPAC	712	0.00565051	FALSE	TRUE	TRUE	SCH-28080	Potent inhibitor of gastric H+ and K+-ATPase.	CC1=C(CC#N)N2C=CC=C(OCC3=CC=CC=C3)C2=N1
LOPAC	810	0.00634952	FALSE	TRUE	TRUE	O6-benzylguanine	Irreversible inhibitor of the mammalian DNA repair protein, O6-alkylguanine-DNA alkyltransferase	NC1=NC2=C(N=CN2)C(OCC2=CC=CC=C2)=N1
14030	711	0.0071357	FALSE	TRUE	TRUE	SULFAPHENAZOLE	antibacterial	NC1=CC=C(C=C1)S(=O)(=O)NC1=CC=NN1C1=CC=CC=C1
14030	759	0.0085926	FALSE	TRUE	TRUE	VANCOMYCIN HYDROCHLORIDE	antibacterial	Cl.CN[C@H](CC(C)C)C(=O)NC1[C@H](O)C2=CC=C(OC3=C(O[C@@H]4OC(CO)[C@@H](O)[C@H](O)[C@H]4O[C@H]4C[C@](C)(N)[C@H](O)[C@H](C)O4)C4=CC(=C3)[C@@H](NC(=O)[C@H](CC(N)=O)NC1=O)C(=O)NC1C3=CC(=C(O)C=C3)C3=C(C=C(O)C=C3O)[C@@H](NC(=O)[C@@H](CC1=O)[C@H](O)C1=CC=C(O4)C(Cl)=C1)C(O)=O)C(Cl)=C2
TM-L4	646	0.0101964	FALSE	TRUE	TRUE	Bedaquiline	Bedaquiline(TMC207; R207910) is an anti-tuberculosis drug which selectively inhibit the mycobacterial energy metabolism i.e. ATP synthesis and found to be effective against all states of Mycobacterium tuberculosis.	Brc1cc2cc([C@H]([C@](O)(c3c4c(ccc3)cccc4)CCN(C)C)c3ccccc3)c(OC)nc2cc1
14030	690	0.0105333	FALSE	TRUE	TRUE	16(17)-EPOXY-21-ACETOXY-5-PREGNENOLONE		CC(=O)OCC(=O)[C@@]12O[C@@H]1CC1C3CC=C4C[C@@H](O)CC[C@]4(C)C3CC[C@]21C
L1200	826	0.013007	FALSE	TRUE	TRUE	Phenformin HCl	Phenformin hydrochloride is a hydrochloride salt of phenformin that is an anti-diabetic drug from the biguanide class.	C1(=CC=C(C=C1)CCNC(NC(=N)N)=N).Cl
14030	804	0.0134845	FALSE	TRUE	TRUE	MECHLORETHAMINE	antineoplastic, alkylating agent	CN(CCCl)CCCl
LOPAC	724	0.0149795	FALSE	TRUE	TRUE	LP 12 hydrochloride hydrate	5-HT7 receptor agonist displaying selectivity over D2, 5-HT1A and 5-HT2A receptors	Cl.O=C(CCCCCN1CCN(CC1)C1=CC=CC=C1C1=CC=CC=C1)NC1CCCC2=CC=CC=C12
L2300	786	0.015672	FALSE	TRUE	TRUE	SHAM CONTROL	SHAM CONTROL	SHAM CONTROL
TM-L4	631	0.0181752	FALSE	TRUE	TRUE	Niclosamide	Niclosamide(BAY2353) is used to treat most tapeworm infections by inhibiting DNA replication.	Oc1c(cc(Cl)cc1)C(=O)Nc1c(Cl)cc(cc1)[N+](=O)[O-]
14030	666	0.0223538	FALSE	TRUE	TRUE	CAPTAN	fungicide, antibacterial	ClC(Cl)(Cl)SN1C(=O)C2CC=CCC2C1=O
LOPAC	750	0.0265413	FALSE	TRUE	TRUE	U-62066	Highly selective kappa opioid receptor agonist; antitussive	CS(O)(=O)=O.CN([C@@H]1CC[C@]2(CCCO2)C[C@H]1N1CCCC1)C(=O)CC1=CC=C(Cl)C(Cl)=C1
L1200	769	0.0293189	FALSE	TRUE	TRUE	NSC 23766	NSC 23766 is an inhibitor of Rac GTPase targeting Rac activation by guanine nucleotide exchange factors (GEFs) with IC50 of ~50 μM; does not inhibit the closely related targets, Cdc42 or RhoA.	N1(C(=CC(=C2C=C(C=CC=12)NC3=NC(=NC(=C3)C)NC(CCCN(CC)CC)C)N)C).Cl.Cl.Cl
L1200	780	0.0312792	FALSE	TRUE	TRUE	AS-604850	AS-604850 is a selective, ATP-competitive PI3Kγ inhibitor with IC50 of 250 nM, over 80-fold selectivity for PI3Kγ than PI3Kδ/β, and 18-fold more selective for PI3Kγ than PI3Kα.	C12=C(C=CC(=C1)/C=C3\SC(NC3=O)=O)OC(O2)(F)F
14030	859	0.0345376	FALSE	TRUE	TRUE	METRONIDAZOLE	antiprotozoal	CC1=NC=C(N1CCO)[N+]([O-])=O
TM-L4	744	0.0386788	FALSE	TRUE	TRUE	Zoledronic Acid	Zoledronate is a bisphosphonate. Zometa is used to prevent skeletal fractures in patients with cancers such as multiple myeloma and prostate cancer. It can also be used to treat hypercalcemia of malignancy and can be helpful for treating pain from bone metastases. An annual dose of Zoledronate may also prevent recurring fractures in patients with a previous hip fracture. Zoledronate is a single 5…	c1cn(cn1)CC(O)(P(=O)(O)O)P(=O)(O)O
TM-L4	723	0.039677	FALSE	TRUE	TRUE	Promethazine hydrochloride	Promethazine HCl(NSC-231688), the first-generation antihistamine, is a strong antagonist of the H1 receptor and a moderate antagonist of the mACh receptor, moderate affinity for 5-HT2A, 5-HT2C, D2 and α1-adrenergic receptors.	Cl.CC(CN1c2ccccc2Sc2ccccc12)N(C)C
14030	922	0.0399484	FALSE	TRUE	TRUE	NORGESTIMATE	progestin	CC[C@]12CCC3C(CCC4=C\C(CCC34)=N\O)C1CC[C@@]2(OC(C)=O)C#C
L2300	716	0.0413303	FALSE	TRUE	TRUE	ITX 3		C12=NC3C(N1C(C(/S2)=C/C4=C(N(C(=C4)C)C5C=CC=CC=5)C)=O)=CC=CC=3
14030	758	0.043286	FALSE	TRUE	TRUE	DYCLONINE HYDROCHLORIDE	anesthetic (topical)	Cl.CCCCOC1=CC=C(C=C1)C(=O)CCN1CCCCC1
L1200	808	0.0440214	FALSE	TRUE	TRUE	Alectinib (CH5424802)	CH5424802 is a potent ALK inhibitor with IC50 of 1.9 nM, sensitive to L1196M mutation and higher selectivity for ALK than PF-02341066, NVP-TAE684 and PHA-E429. Phase 1/2.	C1(=CC=C2C(=C1)NC3=C2C(C4=C(C3(C)C)C=C(C(=C4)CC)N5CCC(CC5)N6CCOCC6)=O)C#N
LOPAC	621	0.0443751	FALSE	TRUE	TRUE	S-(+)-Fluoxetine hydrochloride	Selective serotonin reuptake inhibitor	Cl.CNCC[C@H](OC1=CC=C(C=C1)C(F)(F)F)C1=CC=CC=C1
14030	576	0.0463659	FALSE	TRUE	TRUE	UTILIN		CCC(C)C(=O)O[C@@H]1C[C@@]2(C)[C@@H](OC(=O)CC22OC3(C)O[C@]11[C@]4(C)[C@@H](CC(=O)OC)C5(C)CC4(O)[C@](O)(C5OC(=O)C4(C)OC4C)[C@@H](OC(C)=O)[C@]21O3)C1=COC=C1
TM-L4	754	0.0495553	FALSE	TRUE	TRUE	Roflumilast	Roflumilast is an orally available, long-acting inhibitor of phosphodiesterase (PDE) type 4 (PDE4), with anti-inflammatory and potential antineoplastic activities. Upon administration, roflumilast and its active metabolite roflumilast N-oxide selectively and competitively bind to and inhibit PDE4, which leads to an increase of both intracellular levels of cyclic-3', 5'-adenosine monophosphate (cA…	FC(F)Oc1c(OCC2CC2)cc(cc1)C(=O)Nc1c(Cl)cncc1Cl
TM-L4	791	0.0499853	FALSE	TRUE	TRUE	Dabigatran Etexilate Mesylate	Dabigatran etexilate mesylate is the orally active prodrug of dabigatran. Dabigatran is a reversible and selective, direct thrombin inhibitor (DTI, Ki: 4.5 nM).	CS(O)(=O)=O.CCCCCCOC(=O)NC(=N)c1ccc(NCc2nc3cc(ccc3n2C)C(=O)N(CCC(=O)OCC)c2ccccn2)cc1
TM-L4	702	0.0577162	FALSE	TRUE	TRUE	Pyridoxine hydrochloride	Pyridoxine hydrochloride is the 4-methanol form of vitaminB6 which is converted to pyridoxal phosphate which is a coenzyme for synthesis of amino acids, neurotransmitters (serotonin, norepinephrine), sphingolipids, aminolevulinic acid.	Cl.Cc1ncc(CO)c(CO)c1O
LOPAC	818	0.0618086	FALSE	TRUE	TRUE	Pregnenolone sulfate sodium	Neurosteroid that antagonizes the GABA-A receptor chloride channels	[Na+].CC(=O)[C@H]1CCC2C3CC=C4C[C@H](CC[C@]4(C)C3CC[C@]12C)OS([O-])(=O)=O
14030	875	0.0618911	FALSE	TRUE	TRUE	DIBUCAINE HYDROCHLORIDE	anesthetic (local)	Cl.CCCCOC1=CC(C(=O)NCCN(CC)CC)=C2C=CC=CC2=N1
LOPAC	679	0.0624476	FALSE	TRUE	TRUE	Droxinostat	..Droxinostat is a selective inhibitor of HDAC3, HDAC6, and HDAC8. .Droxinostat is a selective inhibitor of HDAC3, HDAC6, and HDAC8	CC1=CC(Cl)=CC=C1OCCCC(=O)NO
L1900	765	0.0637378	FALSE	TRUE	TRUE	Barasertib (AZD1152-HQPA)	AZD1152-HQPA (Barasertib) is a highly selective Aurora B inhibitor with IC50 of 0.37 nM, ~100 fold more selective for Aurora B over Aurora A.	C1(=CC=C2C(=C1)N=CN=C2NC3NN=C(C=3)CC(NC4=CC=CC(=C4)F)=O)OCCCN(CCO)CC
TM-L4	651	0.0644298	FALSE	TRUE	TRUE	Meclocycline sulfosalicylate salt	Meclocycline (INN), a tetracycline antibiotic, is used topically (i.e. for skin infections) as it is totally insoluble in water and may damage kidney and liver if given systemically.	OC(=O)c1cc(ccc1O)S(O)(=O)=O.CN(C)[C@H]1[C@@H]2[C@@H](O)[C@@H]3C(=C)c4c(Cl)ccc(O)c4C(=O)C3=C(O)[C@]2(O)C(=O)C(C(N)=O)=C1O
LOPAC	774	0.065506	FALSE	TRUE	TRUE	Quinelorane dihydrochloride	D2 Dopamine receptor agonist; 2-aminopyridine analog of Quinpirole	Cl.Cl.CCCN1CCC[C@@H]2CC3=NC(N)=NC=C3C[C@@H]12
L1900	799	0.0657728	FALSE	TRUE	TRUE	Pracinostat (SB939)	SB939 is a potent pan-HDAC inhibitor with IC50 of 40-140 nM with exception for HDAC6. It has no activity against the class III isoenzyme SIRT I. Phase 2.	C1(=CC=C2C(=C1)N=C(N2CCN(CC)CC)CCCC)/C=C/C(NO)=O
14030	895	0.0666567	FALSE	TRUE	TRUE	METHYLTHIOURACIL	antithyroid agent	CC1=CC(=O)NC(=S)N1
14030	781	0.0669779	FALSE	TRUE	TRUE	BENZOYLPAS	antibacterial, tuberculostatic	OC(=O)C1=CC=C(NC(=O)C2=CC=CC=C2)C=C1O
14030	776	0.0701708	FALSE	TRUE	TRUE	MERCAPTOPURINE	antineoplastic, purine antimetabolite	S=C1NC=NC2=C1NC=N2
14030	709	0.0711549	FALSE	TRUE	TRUE	NEOSTIGMINE BROMIDE	cholinergic	[Br-].CN(C)C(=O)OC1=CC(=CC=C1)[N+](C)(C)C
LOPAC	717	0.0714858	FALSE	TRUE	TRUE	JW74	JW74 is an efficient and specific inhibitor of the canonical Wnt signaling in vitro and in vivo	COC1=CC=C(C=C1)N1C(SCC2=NC(=NO2)C2=CC=C(C)C=C2)=NN=C1C1=CC=NC=C1
TM-L4	786	0.0728138	FALSE	TRUE	TRUE	Loperamide hydrochloride	Loperamide Hydrochloride is a synthetic, piperidine derivative and opioid agonist with antidiarrheal activity.	Cl.CN(C)C(=O)C(CCN1CCC(O)(CC1)c1ccc(Cl)cc1)(c1ccccc1)c1ccccc1
LOPAC	719	0.0732623	FALSE	TRUE	TRUE	CX 546	Positive AMPA glutamate receptor modulator; more potent than 1-BCP	O=C(N1CCCCC1)C1=CC2=C(OCCO2)C=C1
14030	692	0.0749258	FALSE	TRUE	TRUE	NITROMIDE	antibacterial, coccidiostat	NC(=O)C1=CC(=CC(=C1)[N+]([O-])=O)[N+]([O-])=O
LOPAC	822	0.0766956	FALSE	TRUE	TRUE	2,6-Difluoro-4-[2-(phenylsulfonylamino)ethylthio]phenoxyacetamide	Selective, high affinity AMPA ionotropic glutamate receptor agonist; reduces ischemia-induced performance deficits in rats.	NC(=O)COC1=C(F)C=C(SCCNS(=O)(=O)C2=CC=CC=C2)C=C1F
14030	848	0.07714	FALSE	TRUE	TRUE	METHOXSALEN	antipsoriatic, pigmentation agent	COC1=C2OC=CC2=CC2=C1OC(=O)C=C2
TM-L4	667	0.0771866	FALSE	TRUE	TRUE	Fluoxetine	Fluoxetine is the first highly specific serotonin uptake inhibitor. It is used as an antidepressant and often has a more acceptable side-effects profile than traditional antidepressants.	CNCCC(Oc1ccc(cc1)C(F)(F)F)c1ccccc1
14030	654	0.0779809	FALSE	TRUE	TRUE	DIBENZOTHIOPHENE	keratolytic	S1C2=C(C=CC=C2)C2=C1C=CC=C2
LOPAC	716	0.0783498	FALSE	TRUE	TRUE	1-(5-Isoquinolinylsulfonyl)-2-methylpiperazine dihydrochloride	Inhibitor of cyclic nucleotide dependent protein kinase (PKA) and protein kinase C (PKC)	Cl.Cl.CC1CNCCN1S(=O)(=O)C1=CC=CC2=CN=CC=C12
14030	897	0.0802445	FALSE	TRUE	TRUE	ACETYLCYSTEINE	mucolytic	CC(=O)NC(CS)C(O)=O
TM-L4	706	0.0811463	FALSE	TRUE	TRUE	L-Arginine	1. L-Arginine exhibits anti-atherosclerotic effect. 2. L-Arginine and soy enriched diet are effective in prevention of osteoporosis associated with diabetes mellitus. 3. Exogenous L-Arginine could enhance neonate lymphocyte proliferation through an interleukin-2-independent pathway. 4. A combination of oral L-citrulline and L-Arginine effectively and rapidly augments NO-dependent responses at the…	N[C@@H](CCCNC(N)=N)C(O)=O
14030	897	0.0813565	FALSE	TRUE	TRUE	METHIMAZOLE	antihyperthyroid	CN1C=CNC1=S
L2300	794	0.0816754	FALSE	TRUE	TRUE	SHAM CONTROL	SHAM CONTROL	SHAM CONTROL
14030	660	0.0819586	FALSE	TRUE	TRUE	ALMOTRIPTAN	5HT 1B/2D receptor agonist	CN(C)CCC1=CNC2=CC=C(CS(=O)(=O)N3CCCC3)C=C12
L1900	728	0.0822787	FALSE	TRUE	TRUE	ZM 39923 HCl	ZM 39923 is an JAK1/3 inhibitor with pIC50 of 4.4/7.1, almost no activity to JAK2 and modestly potent to EGFR; also found to be sensitive to transglutaminase.	C(CCN(C(C)C)CC1C=CC=CC=1)(=O)C2(C=C3C=CC=CC(=CC=2)3).Cl
L2300	806	0.0844828	FALSE	TRUE	TRUE	Cladribine	Cladribine (Leustatin, Litak, 2CDA) is an adenosine deaminase inhibitor for U266, RPMI8226, and MM1.S cells with IC50 of approximately 2.43 μM, 0.75 μM, and 0.18 μM, respectively.	N1=C(C2=C(N=C1Cl)N(C=N2)[C@H]3C[C@@H]([C@H](O3)CO)O)N
14030	737	0.0852235	FALSE	TRUE	TRUE	ANISINDIONE	anticoagulant	COC1=CC=C(C=C1)C1C(=O)C2=CC=CC=C2C1=O
14030	729	0.0898782	FALSE	TRUE	TRUE	CANDESARTAN CILEXTIL	angiotensin 1 receptor antagonist	CCOC1=NC2=C(N1CC1=CC=C(C=C1)C1=C(C=CC=C1)C1=NN=NN1)C(=CC=C2)C(=O)OC(C)OC(=O)OC1CCCCC1
TM-L4	780	0.0919647	FALSE	TRUE	TRUE	Guanabenz Acetate	Guanabenz Acetate is a specific agonist of adrenergic receptor. The pEC50 for α2a-adrenergic receptor, α2b-adrenergic receptor and α2c-adrenergic receptor is 8.25, 7.01 and ~5, respectively.	c1(c(cccc1Cl)Cl)/C=N/NC(=N)N.C(=O)(C)O
LOPAC	758	0.0921452	FALSE	TRUE	TRUE	Stattic	Irreversible STAT3 activation inhibitor.	[O-][N+](=O)C1=CC=C2C=CS(=O)(=O)C2=C1
14030	832	0.0956242	FALSE	TRUE	TRUE	PREDNISOLONE ACETATE	glucocorticoid	CC(=O)OCC(=O)[C@@]1(O)CCC2C3CCC4=CC(=O)C=CC4(C)C3[C@@H](O)C[C@]12C
TM-L4	805	0.0973246	FALSE	TRUE	TRUE	SHAM CONTROL	SHAM CONTROL	SHAM CONTROL
14030	883	0.0973954	FALSE	TRUE	TRUE	DAPSONE	antibacterial, leprostatic, dermatitis herpetiformis suppressant	NC1=CC=C(C=C1)S(=O)(=O)C1=CC=C(N)C=C1
14030	640	0.0991649	FALSE	TRUE	TRUE	ROXATIDINE ACETATE HYDROCHLORIDE	antiulcer	Cl.CC(=O)OCC(=O)NCCCOC1=CC(CN2CCCCC2)=CC=C1
14030	687	0.09971	FALSE	TRUE	TRUE	LEVOCETIRIZINE DIHYDROCHLORIDE	H1 antihistamine, antiallergic	Cl.Cl.OC(=O)CCCN1CCN(CC1)[C@H](C1=CC=CC=C1)C1=CC=C(Cl)C=C1
LOPAC	701	0.101629	FALSE	TRUE	TRUE	Diacylglycerol Kinase Inhibitor II	Diacylglycerol kinase inhibitor	FC1=CC=C(C=C1)C(=C1CCN(CCN2C(=S)N=C3C=CC=CC3C2=O)CC1)C1=CC=C(F)C=C1
14030	733	0.102092	FALSE	TRUE	TRUE	3-ISOBUTYL-1-METHYLXANTHINE	phosphodiesterase inhibitor	CC(C)CN1C2=C(N=CN2)C(=O)N(C)C1=O
14030	675	0.108698	FALSE	TRUE	TRUE	METHSCOPOLAMINE BROMIDE	anticholinergic	[Br-].C[N+]1(C)C2CC(CC1C1OC21)OC(=O)[C@@H](CO)C1=CC=CC=C1
TM-L4	678	0.110813	FALSE	TRUE	TRUE	Ethynodiol diacetate	Ethynodiol diacetate is a synthetic progestational hormone used alone or in combination with estrogens as an oral contraceptive.	[C@@]1([C@@]2([C@@H](CC1)[C@H]1[C@H](CC2)[C@@H]2C(=C[C@H](CC2)OC(=O)C)CC1)C)(OC(=O)C)C#C
L1900	721	0.112984	FALSE	TRUE	TRUE	SHAM CONTROL	SHAM CONTROL	SHAM CONTROL
14030	674	0.113669	FALSE	TRUE	TRUE	MAFENIDE HYDROCHLORIDE	antibacterial	Cl.NCC1=CC=C(C=C1)S(N)(=O)=O
LOPAC	779	0.114312	FALSE	TRUE	TRUE	Phorbol 12-myristate 13-acetate	Activates protein kinase C in vivo and in vitro; strong NO promoter; promotes expression of iNOS in cultured hepatocytes;T lymphocyte activator	CCCCCCCCCCCCCC(=O)O[C@@H]1[C@@H](C)[C@]2(O)[C@@H]3C=C(C)C(=O)[C@]3(O)CC(CO)=C[C@H]2[C@@H]2C(C)(C)[C@]12OC(C)=O
14030	782	0.114577	FALSE	TRUE	TRUE	CREATININE	metabolic enhancer	CN1CC(=O)NC1=N
LOPAC	753	0.116733	FALSE	TRUE	TRUE	Actinonin	Leucine aminopeptidase inhibitor	CCCCC[C@H](CC(=O)NO)C(=O)N[C@@H](C(C)C)C(=O)N1CCC[C@H]1CO
LOPAC	748	0.119045	FALSE	TRUE	TRUE	3,5-Dinitrocatechol	Selective inhibitor of catechol O-methyl transferase (COMT).	OC1=C(O)C(=CC(=C1)[N+]([O-])=O)[N+]([O-])=O
LOPAC	707	0.119064	FALSE	TRUE	TRUE	Ketanserin tartrate	Selective 5-HT2 serotonin receptor blocker	OC(C(O)C(O)=O)C(O)=O.FC1=CC=C(C=C1)C(=O)C1CCN(CCN2C(=O)NC3=CC=CC=C3C2=O)CC1
LOPAC	814	0.119199	FALSE	TRUE	TRUE	Celecoxib	Celecoxib is a non-steroidal, anti-inflammatory drug (NSAID) and a cyclooxygenase-2 (COX-2) selective inhibitor.	CC1=CC=C(C=C1)C1=CC(=NN1C1=CC=C(C=C1)S(N)(=O)=O)C(F)(F)F
L2300	809	0.121338	FALSE	TRUE	TRUE	Tofacitinib (CP-690550, Tasocitinib)	CP-690550 is a novel inhibitor of JAK3 with IC50 of 1 nM.	N1=CN=C2C(=C1N(C)[C@H]3CN(CC[C@@H]3C)C(=O)CC#N)C=CN2
L1200	789	0.121916	FALSE	TRUE	TRUE	AZD5438	AZD5438 is a potent inhibitor of CDK1/2/9 with IC50 of 16 nM/6 nM/20 nM. It is less potent to CDK5/6 and also inhibits GSK3β. Phase 1.	C1=C(C=CC(=C1)NC2=NC=CC(=N2)C3=CN=C(N3C(C)C)C)S(=O)(C)=O
LOPAC	669	0.123269	FALSE	TRUE	TRUE	Bexarotene	Bexarotene is a highly selective retinoid X receptor (RXR) agonist	CC1=CC2=C(C=C1C(=C)C1=CC=C(C=C1)C(O)=O)C(C)(C)CCC2(C)C
14030	686	0.123301	FALSE	TRUE	TRUE	CHLORPROMAZINE	antiemetic, antipsychotic	CN(C)CCCN1C2=C(SC3=C1C=C(Cl)C=C3)C=CC=C2
14030	917	0.128399	FALSE	TRUE	TRUE	AMINOGLUTETHIMIDE	aromatase inhibitor, antineoplastic, testosterone suppressant	CCC1(CCC(=O)NC1=O)C1=CC=C(N)C=C1
LOPAC	734	0.129373	FALSE	TRUE	TRUE	L-798106	L-798106 was among the first EP3-selective antagonists	COC1=C(C=C(Br)C=C1)S(=O)(=O)NC(=O)\C=C\C1=C(CC2=CC3=C(C=CC=C3)C=C2)C=CC=C1
TM-L4	789	0.131076	FALSE	TRUE	TRUE	Rotigotine	Rotigotine is a non-ergot dopamine receptor agonist used in the therapy of Parkinson disease and restless leg syndrome. Administered as a once-daily transdermal patch, Rotigotine has not been associated with serum enzyme elevations during treatment or with episodes of clinically apparent liver injury.	CCCN(CCc1cccs1)[C@H]1CCc2c(C1)cccc2O
L2300	590	0.136027	FALSE	TRUE	TRUE	Toremifene Citrate (Fareston, Acapodene)	Toremifene Citrate(Fareston, Acapodene) is an oral selective estrogen receptor modulator (SERM) which helps oppose the actions of estrogen in the body.	C1(=C(C=CC(=C1)/C(C2=CC=CC=C2)=C(\C3=CC=CC=C3)CCCl)OCCN(C)C).OC(CC(CC(=O)O)(C(=O)O)O)=O
14030	722	0.1363	FALSE	TRUE	TRUE	NORETHYNODREL	progestogen, in combination with estrogen as oral contraceptive	C[C@]12CCC3C(CCC4=C3CCC(=O)C4)C1CC[C@@]2(O)C#C
14030	747	0.140147	FALSE	TRUE	TRUE	NORGESTIMATE	progestin	CC[C@]12CCC3C(CCC4=C\C(CCC34)=N\O)C1CC[C@@]2(OC(C)=O)C#C
14030	927	0.141005	FALSE	TRUE	TRUE	IODOQUINOL	antiamebic	OC1=C(I)C=C(I)C2=CC=CN=C12
14030	745	0.141523	FALSE	TRUE	TRUE	DIETHYLTOLUAMIDE	insect repellant	CCN(CC)C(=O)C1=CC(C)=CC=C1
L1200	752	0.142389	FALSE	TRUE	TRUE	OSI-420	OSI-420 is the active metabolite of Erlotinib (EGFR inhibitor with IC50 of 2 nM).	C1(=C(C=CC=C1NC2=NC=NC3=C2C=C(C(=C3)OCCOC)OCCO)C#C).Cl
TM-L4	815	0.143547	FALSE	TRUE	TRUE	Betrixaban	Betrixaban is a non-vitamin K oral anticoagulant whose action is driven by the competitive and reversible inhibition of the factor Xa [1]. It was selected among all lead compounds due to its low hERG channel affinity while sustaining its factor Xa inhibition capacity [3]. Betrixaban, now developed by Portola Pharmaceuticals Inc., is prescribed as a venous thromboembolism (VTE) prophylactic for ad…	COc1ccc(NC(=O)c2ccc(cc2)C(=N)N(C)C)c(c1)C(=O)Nc1ccc(Cl)cn1
L2300	719	0.144149	FALSE	TRUE	TRUE	SB 203580	SB203580 is a p38 MAPK inhibitor with IC50 of 0.3-0.5 μM and blocks PKB phosphorylation with IC50 of 3-5 μM.	N1=CC=C(C=C1)C2=C(N=C(N2)C3=CC=C(C=C3)S(C)=O)C4=CC=C(C=C4)F
TM-L4	771	0.145765	FALSE	TRUE	TRUE	SHAM CONTROL	SHAM CONTROL	SHAM CONTROL
14030	849	0.149644	FALSE	TRUE	TRUE	ISOPROPAMIDE IODIDE	anticholinergic	[I-].CC(C)[N+](C)(CCC(C(N)=O)(C1=CC=CC=C1)C1=CC=CC=C1)C(C)C
14030	860	0.150029	FALSE	TRUE	TRUE	LOMERIZINE HYDROCHLORIDE	antimigraine, cerebral vasodilator, Ca channel blocker	COC1=C(OC)C(OC)=C(CN2CCN(CC2)C(C2=CC=C(F)C=C2)C2=CC=C(F)C=C2)C=C1
14030	724	0.153963	FALSE	TRUE	TRUE	ROCURONIUM BROMIDE	neuromuscular blocker	[Br-].CC(=O)O[C@H]1[C@H](CC2C3CCC4C[C@H](O)[C@H](C[C@]4(C)C3CC[C@]12C)N1CCOCC1)[N+]1(CC=C)CCCC1
LOPAC	670	0.158653	FALSE	TRUE	TRUE	Na-p-Tosyl-L-lysine chloromethyl ketone hydrochloride	Adenylyl cyclase inhibitor; blocks the LPS- or cytokine-induced activation of nuclear factor kB (NFkB)	Cl.CC1=CC=C(C=C1)S(=O)(=O)N[C@@H](CCCCN)C(=O)CCl
14030	958	0.160329	FALSE	TRUE	TRUE	MECHLORETHAMINE	antineoplastic, alkylating agent	CN(CCCl)CCCl
14030	753	0.160881	FALSE	TRUE	TRUE	PROBUCOL	antihyperlipidemic	CC(C)(SC1=CC(=C(O)C(=C1)C(C)(C)C)C(C)(C)C)SC1=CC(=C(O)C(=C1)C(C)(C)C)C(C)(C)C
LOPAC	781	0.162927	FALSE	TRUE	TRUE	Zimelidine dihydrochloride	Serotonin reuptake inhibitor; antidepressant	Cl.Cl.CN(C)C\C=C(\C1=CC=C(Br)C=C1)C1=CC=CN=C1
L1200	794	0.167265	FALSE	TRUE	TRUE	XL388	XL388 is a highly potent, selective, ATP-competitive inhibitor of mTOR with IC50 of 9.9 nM, 1000-fold selectivity over the closely related PI3K kinases.	C1(=NC=C(C=C1)C2=CC=C3C(=C2)CN(CCO3)C(=O)C4=CC=C(C(=C4C)F)S(C)(=O)=O)N
14030	760	0.168505	FALSE	TRUE	TRUE	PIZOTYLINE MALATE	5HT antagonist, antimigraine	OC(CC(O)=O)C(O)=O.CN1CCC(CC1)=C1C2=C(CCC3=CC=CC=C13)SC=C2
14030	707	0.170028	FALSE	TRUE	TRUE	HYDROCORTISONE VALERATE	antiinflammatory, glucocorticoid	CCCCC(=O)O[C@@]1(CCC2C3CCC4=CC(=O)CC[C@]4(C)C3[C@@H](O)C[C@]12C)C(=O)CO
14030	816	0.170325	FALSE	TRUE	TRUE	NIFEDIPINE	antianginal, antihypertensive	COC(=O)C1=C(C)NC(C)=C(C1C1=CC=CC=C1[N+]([O-])=O)C(=O)OC
TM-L4	769	0.171199	FALSE	TRUE	TRUE	Doxazosin mesylate	Doxazosin mesylate(UK 33274) is a quinazoline-derivative. It is a selectively antagonizes postsynaptic α1-adrenergic receptors.	C(=O)(C1Oc2c(OC1)cccc2)N1CCN(CC1)c1nc2c(c(n1)N)cc(c(c2)OC)OC.CS(=O)(=O)O
L2300	765	0.171472	FALSE	TRUE	TRUE	SHAM CONTROL	SHAM CONTROL	SHAM CONTROL
L1200	771	0.173412	FALSE	TRUE	TRUE	SL-327	SL327 is a selective inhibitor for MEK1/2 with IC50 of 0.18 μM/ 0.22 μM, no activity towards Erk1, MKK3, MKK4, c-JUN, PKC, PKA, or CamKII;capable of transport through the blood-brain barrier.	C1=CC=CC(=C1C(F)(F)F)/C(=C(/SC2=CC=C(C=C2)N)N)C#N
LOPAC	766	0.174118	FALSE	TRUE	TRUE	Dopamine hydrochloride	Endogenous neurotransmitter	Cl.NCCC1=CC(O)=C(O)C=C1
14030	723	0.17439	FALSE	TRUE	TRUE	DICYCLOHEXYLUREA	antihypertensive, inhibitor of glycoside anomerization	O=C(NC1CCCCC1)NC1CCCCC1
L2300	709	0.176422	FALSE	TRUE	TRUE	SMER 3		C12C(N=C3C(=N1)C(C4C=CC=CC=43)=O)=NON=2
14030	740	0.18088	FALSE	TRUE	TRUE	CHLOROXYLENOL	antibacterial, topical and urinary antiseptic	CC1=CC(O)=CC(C)=C1Cl
TM-L4	662	0.188236	FALSE	TRUE	TRUE	Indapamide	Indapamide is a non-thiazide sulphonamide diuretic compound, generally used in the treatment of hypertension, as well as decompensated cardiac failure.	c12N(C(Cc1cccc2)C)NC(=O)c1cc(c(cc1)Cl)S(=O)(=O)N
LOPAC	820	0.188339	FALSE	TRUE	TRUE	R(+)-3PPP hydrochloride	Binds with high selectivity to sigma receptors, yet has no affinity for phencyclidine receptors; dopamine receptor agonist	Cl.CCCN1CCC[C@@H](C1)C1=CC=CC(O)=C1
14030	912	0.192711	FALSE	TRUE	TRUE	NIFEDIPINE	antianginal, antihypertensive	COC(=O)C1=C(C)NC(C)=C(C1C1=CC=CC=C1[N+]([O-])=O)C(=O)OC
TM-L4	791	0.193298	FALSE	TRUE	TRUE	Rivaroxaban	Rivaroxaban is an orally bioavailable oxazolidinone derivative and direct inhibitor of the coagulation factor Xa with anticoagulant activity. Upon oral administration, rivaroxaban selectively binds to both free factor Xa and factor Xa bound in the prothrombinase complex. This interferes with the conversion of prothrombin (factor II) to thrombin and eventually prevents the formation of cross-linke…	Clc1ccc(s1)C(=O)NC[C@H]1CN(C(=O)O1)c1ccc(cc1)N1CCOCC1=O
14030	673	0.194126	FALSE	TRUE	TRUE	NADOLOL	betaadrenergic blocker	CC(C)(C)NCC(O)COC1=CC=CC2=C1C[C@H](O)[C@H](O)C2
TM-L4	678	0.19738	FALSE	TRUE	TRUE	Prostaglandin E2 (PGE2)	Prostaglandin E2 is a hormone-like substance that participate in a wide range of body functions such as the contraction and relaxation of smooth muscle, the dilation and constriction of blood vessels, control of blood pressure, and modulation of inflammation.	CCCCC[C@H](O)\C=C\[C@H]1[C@H](O)CC(=O)[C@@H]1C\C=C/CCCC(O)=O
14030	670	0.197508	FALSE	TRUE	TRUE	CHLORAMPHENICOL SODIUM SUCCINATE	antibacterial, antirickettsial, inhibits protein synthesis	[Na+].O[C@@H]([C@@H](COC(=O)CCC([O-])=O)NC(=O)C(Cl)Cl)C1=CC=C(C=C1)[N+]([O-])=O
L1900	712	0.198574	FALSE	TRUE	TRUE	SHAM CONTROL	SHAM CONTROL	SHAM CONTROL
14030	703	0.19903	FALSE	TRUE	TRUE	DIFLUNISAL	analgesic, antiinflammatory	OC(=O)C1=C(O)C=CC(=C1)C1=CC=C(F)C=C1F
pfizer	847	0.200043	FALSE	TRUE	TRUE	PHA 767491	Ser/Thr Kinase	Cl.O=C1NCCC2=C1C=C(N2)C1=CC=NC=C1
L1900	746	0.202911	FALSE	TRUE	TRUE	RG108	RG108 is an inhibitor of DNA methyltransferase with IC50 of 115 nM, does not cause trapping of covalent enzymes.	[C@@](N1C(C2=CC=CC=C2C1=O)=O)(CC3C4=C(NC=3)C=CC=C4)(C(O)=O)[H]
TM-L4	691	0.204494	FALSE	TRUE	TRUE	Safinamide mesylate	Safinamide Mesylate, a mesylate salt of Safinamide, can reversibly and specifically inhibit MAO-B (IC50: 98 nM), has 5918-fold selectivity against MAO-A.	CS(=O)(=O)O.C[C@H](NCc1ccc(OCc2cc(F)ccc2)cc1)C(=O)N
L2300	595	0.205523	FALSE	TRUE	TRUE	Pemetrexed	Pemetrexed disodium (Alimta) is a novel antifolate and antimetabolite for TS, DHFR and GARFT with Ki of 1.3 nM, 7.2 nM and 65 nM, respectively.	C([C@H](NC(C1C=CC(=CC=1)CCC2=CNC3NC(=NC(C=32)=O)N)=O)CCC(=O)O[Na])(=O)O[Na]
14030	924	0.206524	FALSE	TRUE	TRUE	FLUOCINONIDE	antiinflammatory, glucocorticoid	CC(=O)OCC(=O)[C@@]12OC(C)(C)O[C@@H]1CC1C3C[C@H](F)C4=CC(=O)C=C[C@]4(C)[C@@]3(F)[C@@H](O)C[C@]21C
LOPAC	781	0.209159	FALSE	TRUE	TRUE	N6-2-(4-Aminophenyl)ethyladenosine	Potent, non-selective A3 adenosine receptor agonist	NC1=CC=C(CCNC2=NC=NC3=C2N=CN3C2OC(CO)C(O)C2O)C=C1
14030	671	0.213098	FALSE	TRUE	TRUE	CEFAZOLIN SODIUM	antibacterial	[Na+].CC1=NN=C(SCC2=C(N3[C@H](SC2)[C@H](NC(=O)CN2C=NN=N2)C3=O)C([O-])=O)S1
LOPAC	772	0.213328	FALSE	TRUE	TRUE	Clofibrate	Antihyperlipoproteinemic; increases lipoprotein lipase activity, thus enhancing the rate of intravascular catabolism of ULDL to IDL and LDL	CCOC(=O)C(C)(C)OC1=CC=C(Cl)C=C1
LOPAC	743	0.215284	FALSE	TRUE	TRUE	TCPOBOP	Constitutive androstane receptor (CAR) agonist; most potent known member of the phenobarbital-like class of CYP-inducing agents	ClC1=CC(Cl)=C(OC2=CC=C(OC3=NC=C(Cl)C=C3Cl)C=C2)N=C1
14030	628	0.215437	FALSE	TRUE	TRUE	1S,2R-PHENYLPROPANOLAMINE HYDROCHLORIDE	vasoconstrictor, decongestant, anorexic	Cl.C[C@@H](N)[C@@H](O)C1=CC=CC=C1
LOPAC	667	0.216029	FALSE	TRUE	TRUE	Chlorprothixene hydrochloride	D2 dopamine receptor antagonist; blocks a subset of GABA-A receptors in rat cortex that is also blocked by clozapine	Cl.CN(C)CC\C=C1\C2=C(SC3=C1C=CC(Cl)=C3)C=CC=C2
TM-L4	698	0.216271	FALSE	TRUE	TRUE	Galanthamine HBr	Galanthamine hydrobromide, a long-acting and centrally active AChE inhibitor (IC50:410 nM), is an allosteric potentiator at neuronal nicotinic ACh receptors.	CN1CC[C@@]23C=C[C@@H](C[C@@H]2Oc2c(ccc(c32)C1)OC)O.Br
LOPAC	779	0.219199	FALSE	TRUE	TRUE	TPMPA	Selective GABA-C receptor antagonist	CP([O-])(=O)C1=CC[NH2+]CC1
L1900	776	0.220096	FALSE	TRUE	TRUE	Entacapone	Entacapone inhibits catechol-O-methyltransferase(COMT) with IC50 of 151 nM.	C(/C(=C/C1C=C(C(=C(C=1)[N+](=O)[O-])O)O)C#N)(=O)N(CC)CC
LOPAC	713	0.221335	FALSE	TRUE	TRUE	Maprotiline hydrochloride	Selective norepinephrine reuptake inhibitor	Cl.CNCCCC12CCC(C3=C1C=CC=C3)C1=C2C=CC=C1
LOPAC	667	0.222559	FALSE	TRUE	TRUE	Benzamidine hydrochloride	Peptidase inhibitor	Cl.NC(=N)C1=CC=CC=C1
14030	699	0.222636	FALSE	TRUE	TRUE	DIOXYBENZONE	ultraviolet screen	COC1=CC=C(C(=O)C2=C(O)C=CC=C2)C(O)=C1
14030	848	0.229175	FALSE	TRUE	TRUE	BETHANECHOL CHLORIDE	cholinergic	[Cl-].CC(C[N+](C)(C)C)OC(N)=O
LOPAC	776	0.229349	FALSE	TRUE	TRUE	Papaverine hydrochloride	Phosphodiesterase inhibitor	Cl.COC1=CC=C(CC2=NC=CC3=C2C=C(OC)C(OC)=C3)C=C1OC
14030	899	0.230113	FALSE	TRUE	TRUE	CLOPERASTINE HYDROCHLORIDE	antitussive	Cl.ClC1=CC=C(C=C1)C(OCCN1CCCCC1)C1=CC=CC=C1
14030	929	0.230456	FALSE	TRUE	TRUE	BITHIONATE SODIUM	anthelmintic, antiseptic	[Na+].[Na+].[O-]C1=C(SC2=CC(Cl)=CC(Cl)=C2[O-])C=C(Cl)C=C1Cl
14030	761	0.234566	FALSE	TRUE	TRUE	TROXERUTIN	vasoprotectant	C[C@@H]1O[C@@H](OC[C@H]2OC(OC3=C(OC4=CC(OCCO)=CC(O)=C4C3=O)C3=CC=C(OCCO)C(OCCO)=C3)[C@H](O)[C@@H](O)[C@@H]2O)[C@H](O)[C@H](O)[C@H]1O
LOPAC	821	0.234837	FALSE	TRUE	TRUE	Carvedilol	Antihypertensive; cardioprotective	COC1=C(OCCNCC(O)COC2=CC=CC3=C2C2=C(N3)C=CC=C2)C=CC=C1
TM-L4	638	0.236966	FALSE	TRUE	TRUE	Meclizine dihydrochloride	Meclizine hydrochloride is a histamine H1 antagonist used in the treatment of motion sickness, vertigo, and nausea during pregnancy and radiation sickness.	c1(cc(ccc1)C)CN1CCN(C(c2ccc(cc2)Cl)c2ccccc2)CC1.Cl.Cl
14030	692	0.237817	FALSE	TRUE	TRUE	SODIUM OXYBATE	anesthetic	[Na+].OCCCC([O-])=O
L2300	785	0.240445	FALSE	TRUE	TRUE	NU6027		C1CCCC(C1)COC2=NC(=NC(=C2N=O)N)N
14030	909	0.244354	FALSE	TRUE	TRUE	AMINOCAPROIC ACID HYDROCHLORIDE	hemostatic	Cl.NCCCCCC(O)=O
14030	708	0.244596	FALSE	TRUE	TRUE	CARBACHOL	cholinergic, miotic	[Cl-].C[N+](C)(C)CCOC(N)=O
L1900	771	0.244626	FALSE	TRUE	TRUE	SHAM CONTROL	SHAM CONTROL	SHAM CONTROL
L2300	728	0.245636	FALSE	TRUE	TRUE	Marimastat		[C@@](C(N[C@](C(NC)=O)(C(C)(C)C)[H])=O)([C@@](C(NO)=O)(O)[H])(CC(C)C)[H]
L2300	752	0.245857	FALSE	TRUE	TRUE	PAC-1	PAC-1 is a potent procaspase-3 activator with EC50 of 0.22 μM.	C1(CN2CCN(CC2)CC(N/N=C/C3=CC=CC(=C3O)CC=C)=O)=CC=CC=C1
LOPAC	724	0.246841	FALSE	TRUE	TRUE	p-Benzoquinone	Benzene metabolite; induces mutations in DNA at G:C base pairs; induces writhing in mice; topoisomerase II inhibitor	O=C1C=CC(=O)C=C1
TM-L4	853	0.25017	FALSE	TRUE	TRUE	Niraparib	MK-4827(Niraparib) is a selective inhibitor of PARP1/PARP2 with IC50 of 3.8 nM/2.1 nM; with great activity in cancer cells with mutant BRCA-1 and BRCA-2; >330-fold selective against PARP3, V-PARP and Tank1.	c1(cccc2c1nn(c2)c1ccc(cc1)[C@H]1CNCCC1)C(=O)N
L2300	731	0.252969	FALSE	TRUE	TRUE	SHAM CONTROL	SHAM CONTROL	SHAM CONTROL
L1200	748	0.253792	FALSE	TRUE	TRUE	Wortmannin	Wortmannin is a PI3K with IC50 of 3 nM, first described PI3K inhibitors, but little selectivity within the PI3K family. Also blocks autophagosome formation and potently inhibits DNA-PK/ATM with IC50 of 16 nM and 150 nM. Phase 4.	C1(C2C3[C@]([C@H](O1)COC)(C4=C(C(C=3OC=2)=O)[C@@]5(CCC([C@@](C[C@@H]4OC(=O)C)5C)=O)[H])C)=O
14030	649	0.253976	FALSE	TRUE	TRUE	THIORIDAZINE HYDROCHLORIDE	antipsychotic	Cl.CSC1=CC2=C(SC3=C(C=CC=C3)N2CCC2CCCCN2C)C=C1
TM-L4	600	0.257501	FALSE	TRUE	TRUE	Trimipramine maleate	Trimipramine maleate appears to inhibit serotonin transport and norepinephrine uptake by nerve terminals. This increases available norepinephrine or serotonin and prolongs its action. Trimipramine Maleate is the maleate salt form of trimipramine, a tricyclic secondary amine of the dibenzazepine class, with an antidepressant property.	c12CCc3c(N(c2cccc1)CC(CN(C)C)C)cccc3.OC(=O)/C=C\C(=O)O
L1200	819	0.258432	FALSE	TRUE	TRUE	TG003	TG003 is a potent and ATP-competitive Cdc2-like kinase (Clk) inhibitor with IC50 of 20 nM, 200 nM, and 15 nM for Clk1, Clk2, and Clk4, respectively. No inhibitory effect on Clk3, SRPK1, SRPK2, or PKC.	C12N(/C(=C/C(C)=O)SC=1C=CC(=C2)OC)CC
14030	697	0.259429	FALSE	TRUE	TRUE	FOSFOSAL	analgesic, antiinflammatory	OC(=O)C1=C(OP(O)(O)=O)C=CC=C1
L1200	738	0.259597	FALSE	TRUE	TRUE	GDC-0941	GDC-0941 is a potent inhibitor of PI3Kα/δ with IC50 of 3 nM, with modest selectivity against p110β (11-fold) and p110γ (25-fold).	C1(=CC=CC2=C1C=NN2)C3=NC(=C4C(=N3)C=C(S4)CN5CCN(CC5)S(=O)(=O)C)N6CCOCC6
TM-L4	712	0.261799	FALSE	TRUE	TRUE	Mirabegron	Mirabegron is a beta-3 adrenergic agonist that is used for treatment of overactive bladder syndrome.	c1sc(nc1CC(=O)Nc1ccc(cc1)CCNC[C@@H](c1ccccc1)O)N
L2300	788	0.263156	FALSE	TRUE	TRUE	IC-87114	IC-87114 is a selective inhibitor of PI3Kδ with IC50 of 0.5 μM.	C12=C(N=C(N(C1=O)C3=C(C=CC=C3)C)CN4C=NC5=C4N=CN=C5N)C=CC=C2C
14030	862	0.264044	FALSE	TRUE	TRUE	DACARBAZINE	antineoplastic	CN(C)\N=N\C1=C(N=CN1)C(N)=O
L1200	729	0.266698	FALSE	TRUE	TRUE	CEP-32496	CEP-32496 is a highly potent inhibitor of BRAF(V600E/WT) and c-Raf with Kd of 14 nM/36 nM and 39 nM, also potent to Abl-1, c-Kit, Ret, PDGFRβ and VEGFR2, respectively; insignificant affinity for MEK-1, MEK-2, ERK-1 and ERK-2. Phase 1/2.	N(C(=O)NC1=NOC(=C1)C(C(F)(F)F)(C)C)C2C=C(C=CC=2)OC3N=CN=C4C=C(C(=CC=34)OC)OC
14030	707	0.266876	FALSE	TRUE	TRUE	CARBIDOPA	decarboxylase inhibitor, antiparkinsonism	C[C@@](CC1=CC(O)=C(O)C=C1)(NN)C(O)=O
LOPAC	683	0.268343	FALSE	TRUE	TRUE	Wortmannin from Penicillium funiculosum	Potent and specific phosphatidylinositol 3-kinase (P13-K) inhibitor	COC[C@H]1OC(=O)C2=COC3=C2[C@@]1(C)C1=C(C2CCC(=O)[C@@]2(C)C[C@H]1OC(C)=O)C3=O
14030	559	0.268749	FALSE	TRUE	TRUE	METHICILLIN SODIUM	antibacterial	[Na+].COC1=CC=CC(OC)=C1C(=O)N[C@H]1[C@H]2SC(C)(C)[C@@H](N2C1=O)C([O-])=O
LOPAC	750	0.268892	FALSE	TRUE	TRUE	Guanidinyl-naltrindole di-trifluoroacetate	Selective kappa opioid receptor antagonist	OC(=O)C(F)(F)F.OC(=O)C(F)(F)F.NC(=N)NC1=CC2=C(NC3=C2C[C@@]2(O)[C@H]4CC5=CC=C(O)C6=C5[C@@]2(CCN4CC2CC2)[C@H]3O6)C=C1
L2300	725	0.269031	FALSE	TRUE	TRUE	SB 265610		C12=C(C(=CC=C1C#N)NC(NC3=C(C=CC=C3)Br)=O)NN=N2
TM-L4	726	0.269873	FALSE	TRUE	TRUE	Levobupivacaine HCl	Levobupivacaine HCl is a reversible neuronal sodium channel inhibitor, which is the pure S(-)-enantiomer of bupivacaine. It was utilized as a long-acting local anesthetic.	Cl.CCCCN1CCCC[C@H]1C(=O)Nc1c(C)cccc1C
14030	663	0.269942	FALSE	TRUE	TRUE	BEZAFIBRATE	antihyperlipidemic	CC(C)(OC1=CC=C(CCNC(=O)C2=CC=C(Cl)C=C2)C=C1)C(O)=O
14030	723	0.271312	FALSE	TRUE	TRUE	CHLORTETRACYCLINE HYDROCHLORIDE	antibacterial, antiamebic, Ca chelator, hepatotoxic; inhibits protein synthesis	Cl.CN(C)[C@H]1[C@@H]2C[C@H]3C(=C(O)[C@]2(O)C(=O)C(C(N)=O)=C1O)C(=O)C1=C(C(Cl)=CC=C1O)[C@@]3(C)O
14030	921	0.272618	FALSE	TRUE	TRUE	CHLOROXYLENOL	antibacterial, topical and urinary antiseptic	CC1=CC(O)=CC(C)=C1Cl
14030	743	0.274474	FALSE	TRUE	TRUE	DANAZOL	anterior pituitary suppressant	C[C@]12CCC3C(CCC4=CC5=C(C[C@]34C)C=NO5)C1CC[C@@]2(O)C#C
14030	766	0.276881	FALSE	TRUE	TRUE	CRYOFLURANE	anesthetic (local)	FC(F)(Cl)C(F)(F)Cl
L1200	737	0.2773	FALSE	TRUE	TRUE	AZD5363	AZD5363 potently inhibits all isoforms of Akt(Akt1/Akt2/Akt3) with IC50 of 3 nM/8 nM/8 nM, similar to P70S6K/PKA and lower activity towards ROCK1/2. Phase 1/2.	N1(CCC(CC1)(C(=O)N[C@@H](CCO)C2C=CC(=CC=2)Cl)N)C3C4=C(N=CN=3)NC=C4
TM-L4	917	0.278326	FALSE	TRUE	TRUE	Palbociclib hydrochloride	Palbociclib (PD-0332991) is a selective inhibitor of CDK4/6 (IC50s: 11/16 nM). It exhibits no inhibition against a panel of 36 additional protein kinases.	Cl.CC(=O)c1c(C)c2cnc(Nc3ccc(cn3)N3CCNCC3)nc2n(C2CCCC2)c1=O
14030	841	0.278667	FALSE	TRUE	TRUE	RACEPHEDRINE HYDROCHLORIDE	bronchodilator, decongestant	Cl.CNC(C)C(O)C1=CC=CC=C1
14030	728	0.278727	FALSE	TRUE	TRUE	VARDENAFIL HYDROCHLORIDE	erectile dysfunction, PD5 inhibitor	Cl.CCCC1=NC(C)=C2N1N=C(NC2=O)C1=C(OCC)C=CC(=C1)S(=O)(=O)N1CCN(CC)CC1
14030	833	0.284021	FALSE	TRUE	TRUE	PRONETALOL HYDROCHLORIDE	beta adrenergic agonist, antiarrhythmic	Cl.CC(C)NCC(O)C1=CC2=CC=CC=C2C=C1
14030	775	0.284871	FALSE	TRUE	TRUE	BISOCTRIZOLE	sunscreen	NCCO.NCCO.CC(C)(C)CC(C)(C)C1=CC(N2N=C3C=CC=CC3=N2)=C(O)C(CC2=C(O)C(=CC(=C2)C(C)(C)CC(C)(C)C)N2N=C3C=CC=CC3=N2)=C1
14030	776	0.284871	FALSE	TRUE	TRUE	CLONAZEPAM	anticonvulsant, sedative	[O-][N+](=O)C1=CC=C2NC(=O)CN=C(C3=CC=CC=C3Cl)C2=C1
L2300	763	0.285794	FALSE	TRUE	TRUE	SHAM CONTROL	SHAM CONTROL	SHAM CONTROL
L2300	797	0.286219	FALSE	TRUE	TRUE	SHAM CONTROL	SHAM CONTROL	SHAM CONTROL
LOPAC	663	0.287156	FALSE	TRUE	TRUE	Chlorpromazine hydrochloride	Dopamine receptor antagonist; anti-emetic; antipsychotic	Cl.CN(C)CCCN1C2=CC(Cl)=CC=C2SC2=C1C=CC=C2
L1200	816	0.292395	FALSE	TRUE	TRUE	PLX-4720	PLX4720 is a potent and selective inhibitor of B-RafV600E with IC50 of 13 nM, equally potent to c-Raf-1(Y340D and Y341D mutations), 10-fold selectivity for B-RafV600E than wild-type B-Raf.	C1(=CN=C2C(=C1)C(=CN2)C(=O)C3=C(C(=CC=C3F)NS(=O)(=O)CCC)F)Cl
14030	674	0.292641	FALSE	TRUE	TRUE	CARBAMAZEPINE	analgesic, anticonvulsant	NC(=O)N1C2=C(C=CC=C2)C=CC2=C1C=CC=C2
L2300	757	0.29467	FALSE	TRUE	TRUE	SHAM CONTROL	SHAM CONTROL	SHAM CONTROL
L1200	776	0.295251	FALSE	TRUE	TRUE	ZCL278	ZCL278 is a selective Cdc42 GTPase inhibitor with Kd of 11.4 μM.	C1=C(N=C(N=C1C)NS(C2=CC=C(C=C2)NC(NC(COC3=C(C=C(C=C3)Br)Cl)=O)=S)(=O)=O)C
LOPAC	745	0.295341	FALSE	TRUE	TRUE	2-Chloroadenosine triphosphate tetrasodium	P2Y receptor agonist	[Na+].[Na+].[Na+].[Na+].NC1=NC(Cl)=NC2=C1N=CN2[C@@H]1O[C@H](COP([O-])(=O)OP([O-])(=O)OP([O-])([O-])=O)[C@H](O)C1O
TM-L4	661	0.29676	FALSE	TRUE	TRUE	Ketorolac tromethamine salt	Ketorolac non-selective inhibits the enzymes cyclooxygenase 1 (COX-1) and COX-2with anti-inflammatory, analgesic, and antipyretic activities.	c1ccc(cc1)C(=O)c1ccc2n1CCC2C(=O)O.OCC(CO)(CO)N
14030	934	0.296889	FALSE	TRUE	TRUE	PENICILLIN G POTASSIUM	antibacterial	[K+].CC1(C)S[C@@H]2[C@H](NC(=O)CC3=CC=CC=C3)C(=O)N2[C@H]1C([O-])=O
14030	706	0.297025	FALSE	TRUE	TRUE	PICROTOXININ	convulsant, GABA receptor antagonist, ichthyotoxin	CC(=C)[C@@H]1[C@H]2OC(=O)[C@@H]1[C@]1(O)C[C@H]3O[C@]33C(=O)O[C@H]2[C@]13C
14030	737	0.297653	FALSE	TRUE	TRUE	PINDOLOL	antihypertensive, antianginal, antiarrhythmic, antiglaucoma	CC(C)NCC(O)COC1=CC=CC2=C1C=CN2
14030	670	0.298479	FALSE	TRUE	TRUE	MECLOFENAMATE SODIUM	antiinflammatory, antipyretic	[Na+].CC1=CC=C(Cl)C(NC2=C(C=CC=C2)C([O-])=O)=C1Cl
LOPAC	693	0.302181	FALSE	TRUE	TRUE	Cyclothiazide	Blocks the rapid desensitization of AMPA glutamate receptors	NS(=O)(=O)C1=C(Cl)C=C2NC(NS(=O)(=O)C2=C1)C1CC2CC1C=C2
L1200	763	0.302525	FALSE	TRUE	TRUE	WYE-354	WYE-354 is a potent, specific and ATP-competitive inhibitor of mTOR with IC50 of 5 nM, blocks mTORC1/P-S6K(T389) and mTORC2/P-AKT(S473) not P-AKT(T308), selective for mTOR than PI3Kα (>100-fold) and PI3Kγ (>500-fold).	C1=C(C=CC(=C1)C2=NC3=C(C(=N2)N4CCOCC4)C=NN3C5CCN(CC5)C(=O)OC)NC(OC)=O
L1200	778	0.305231	FALSE	TRUE	TRUE	SGX-523	SGX-523 is a selective Met inhibitor with IC50 of 4 nM, no activity to BRAFV599E, c-Raf, Abl and p38α. Phase 1.	C1=C2C(=CC(=C1)SC3N4C(=NN=3)C=CC(=N4)C5C=NN(C=5)C)C=CC=N2
14030	797	0.305347	FALSE	TRUE	TRUE	METERGOLINE	analgesic, antipyretic	CN1C=C2CC3[C@@H](CC(CNC(=O)OCC4=CC=CC=C4)CN3C)C3=CC=CC1=C23
14030	774	0.306646	FALSE	TRUE	TRUE	MEMANTINE HYDROCHLORIDE	muscle relaxant (skeletal)	Cl.CC12CC3CC(C)(C1)CC(N)(C3)C2
14030	776	0.309287	FALSE	TRUE	TRUE	HYDROXYPROGESTERONE	progestin	CC(=O)[C@@]1(O)CCC2C3CCC4=CC(=O)CC[C@]4(C)C3CC[C@]12C
pfizer	765	0.31021	FALSE	TRUE	TRUE	ERB-041	Gene Regulation	OC1=CC2=C(OC(=N2)C2=CC(F)=C(O)C=C2)C=C1C=C
L2300	781	0.310749	FALSE	TRUE	TRUE	Dapagliflozin	Dapagliflozin is a potent and selective hSGLT2 inhibitor with EC50 of 1.1 nM.	C1(=CC=C(C(=C1)CC2=CC=C(C=C2)OCC)Cl)[C@@H]3O[C@@H]([C@H]([C@@H]([C@@H]3O)O)O)CO
14030	741	0.311677	FALSE	TRUE	TRUE	BETAMETHASONE ACETATE	antiinflammatory	C[C@H]1CC2C3CCC4=CC(=O)C=C[C@]4(C)[C@@]3(F)[C@@H](O)C[C@]2(C)[C@@]1(O)C(=O)COC(C)=O
LOPAC	779	0.311772	FALSE	TRUE	TRUE	Piceatannol	Non-receptor kinase Syk and Lck inhibitor	OC1=CC(\C=C\C2=CC=C(O)C(O)=C2)=CC(O)=C1
TM-L4	715	0.312084	FALSE	TRUE	TRUE	Macitentan	Macitentan is an endothelin receptor antagonist that is used in the therapy of pulmonary arterial hypertension (PAH).	N(c1c(c(ncn1)OCCOc1ncc(cn1)Br)c1ccc(cc1)Br)S(=O)(=O)NCCC
LOPAC	798	0.313009	FALSE	TRUE	TRUE	Benoxathian hydrochloride	Selective alpha1 adrenoceptor antagonist	Cl.COC1=CC=CC(OC)=C1OCCNCC1CSC2=C(O1)C=CC=C2
14030	723	0.31792	FALSE	TRUE	TRUE	AZATADINE MALEATE	H1-antihistamine	OC(=O)\C=C/C(O)=O.CN1CCC(CC1)=C1C2=C(CCC3=C1N=CC=C3)C=CC=C2
14030	711	0.323628	FALSE	TRUE	TRUE	LIMONIN	antiproliferative, antiviral, antiinflammatory, antinociceptive	CC1(C)O[C@H]2CC(=O)OC[C@@]22[C@H]1CC(=O)[C@]1(C)[C@@H]2CC[C@@]2(C)[C@@H](OC(=O)[C@H]3O[C@@]123)C1=COC=C1
14030	826	0.323968	FALSE	TRUE	TRUE	DILAZEP DIHYDROCHLORIDE	vasodilator, platelet aggregation inhibitor	Cl.Cl.COC1=CC(=CC(OC)=C1OC)C(=O)OCCCN1CCCN(CCCOC(=O)C2=CC(OC)=C(OC)C(OC)=C2)CC1
14030	751	0.324683	FALSE	TRUE	TRUE	ACETAZOLAMIDE	carbonic anhydrase inhibitor, diuretic, antiglaucoma	CC(=O)NC1=NN=C(S1)S(N)(=O)=O
14030	680	0.32518	FALSE	TRUE	TRUE	ADAPALENE	anti-acne	COC1=CC=C(C=C1C12CC3CC(CC(C3)C1)C2)C1=CC=C2C=C(C=CC2=C1)C(O)=O
L1900	758	0.327516	FALSE	TRUE	TRUE	SHAM CONTROL	SHAM CONTROL	SHAM CONTROL
14030	644	0.329876	FALSE	TRUE	TRUE	DISULFIRAM	alcohol antagonist	CCN(CC)C(=S)SSC(=S)N(CC)CC
TM-L4	781	0.331767	FALSE	TRUE	TRUE	Ledipasvir	Ledipasvir is a Hepatitis C Virus NS5A Inhibitor. The mechanism of action of ledipasvir is as a P-Glycoprotein Inhibitor, and Breast Cancer Resistance Protein Inhibitor.	O=C(OC)N[C@H](C(=O)N1[C@H](c2ncc(c3cc4C(F)(F)c5c(ccc(c6ccc7nc([C@H]8N(C(=O)[C@@H](NC(=O)OC)C(C)C)[C@@H]9CC[C@H]8C9)[nH]c7c6)c5)c4cc3)[nH]2)CC2(C1)CC2)C(C)C
14030	693	0.332524	FALSE	TRUE	TRUE	MOLINDONE HYDROCHLORIDE	antipsychotic	Cl.CCC1=C(C)NC2=C1C(=O)C(CN1CCOCC1)CC2
14030	733	0.332936	FALSE	TRUE	TRUE	DICLAZURIL	coccidiostat	ClC1=CC=C(C=C1)C(C#N)C1=C(Cl)C=C(C=C1Cl)N1N=CC(=O)NC1=O
14030	911	0.333814	FALSE	TRUE	TRUE	PRAZIQUANTEL	anthelmintic	O=C(C1CCCCC1)N1CC2N(CCC3=C2C=CC=C3)C(=O)C1
L1900	741	0.334548	FALSE	TRUE	TRUE	SHAM CONTROL	SHAM CONTROL	SHAM CONTROL
TM-L4	667	0.335032	FALSE	TRUE	TRUE	Duvelisib	Duvelisib is an orally bioavailable, highly selective and potent small molecule inhibitor of the delta and gamma isoforms of phosphoinositide-3 kinase (PI3K) with potential immunomodulating and antineoplastic activities.	c1cc(c2c(c1)cc(n(c2=O)c1ccccc1)[C@@H](Nc1ncnc2c1[nH]cn2)C)Cl
L1900	739	0.338432	FALSE	TRUE	TRUE	SHAM CONTROL	SHAM CONTROL	SHAM CONTROL
14030	852	0.339209	FALSE	TRUE	TRUE	ESTRONE	estrogen	C[C@]12CCC3C(CCC4=C3C=CC(O)=C4)C1CCC2=O
14030	865	0.339209	FALSE	TRUE	TRUE	GRISEOFULVIN	antifungal, inhibits mitosis in metaphase	COC1=CC(OC)=C(Cl)C2=C1C(=O)[C@]1(O2)[C@H](C)CC(=O)C=C1OC
14030	952	0.340089	FALSE	TRUE	TRUE	CLOXYQUIN	antibacterial, antifungal	OC1=CC=C(Cl)C2=CC=CN=C12
14030	739	0.341674	FALSE	TRUE	TRUE	HYDROCORTISONE	glucocorticoid, antiinflammatory	C[C@]12C[C@H](O)C3C(CCC4=CC(=O)CC[C@]34C)C1CC[C@]2(O)C(=O)CO
14030	801	0.342831	FALSE	TRUE	TRUE	4-HYDROXYCHALCONE	anti-angiogenesis, antineoplastic	OC1=CC=C(\C=C\C(=O)C2=CC=CC=C2)C=C1
14030	755	0.343583	FALSE	TRUE	TRUE	PREDNISOLONE	glucocorticoid	C[C@]12C[C@H](O)C3C(CCC4=CC(=O)C=C[C@]34C)C1CC[C@]2(O)C(=O)CO
L1200	697	0.343841	FALSE	TRUE	TRUE	Vatalanib (PTK787) 2HCl	Vatalanib (PTK787) is an inhibitor of VEGFR2/KDR with IC50 of 37 nM, less potent against VEGFR1/Flt-1, 18-fold against VEGFR3/Flt-4. Phase 1/2.	C1(=CC=C2C(=C1)C(=NN=C2CC3=CC=NC=C3)NC4=CC=C(C=C4)Cl).Cl.Cl
LOPAC	771	0.346543	FALSE	TRUE	TRUE	3-Tropanyl-indole-3-carboxylate hydrochloride	Selective 5-HT3 serotonin receptor antagonist	Cl.CN1C2CCC1CC(C2)OC(=O)C1=CNC2=C1C=CC=C2
14030	688	0.348158	FALSE	TRUE	TRUE	DOXYCYCLINE HYDROCHLORIDE	antibacterial	Cl.C[C@@H]1[C@H]2[C@H](O)[C@H]3[C@H](N(C)C)C(O)=C(C(N)=O)C(=O)[C@@]3(O)C(O)=C2C(=O)C2=C1C=CC=C2O
14030	797	0.349056	FALSE	TRUE	TRUE	LAPACHOL	antineoplastic, antifungal	CC(C)=CCC1=C(O)C(=O)C2=CC=CC=C2C1=O
TM-L4	795	0.3525	FALSE	TRUE	TRUE	Cefoxitin sodium	Cefoxitin sodium is a semisynthetic cephamycin antibiotic resistant to beta-lactamase.	[C@]1([C@@H]2N(C1=O)C(=C(CS2)COC(=O)N)C(=O)[O-])(NC(=O)Cc1cccs1)OC.[Na+]
L2300	772	0.353328	FALSE	TRUE	TRUE	SHAM CONTROL	SHAM CONTROL	SHAM CONTROL
14030	753	0.353397	FALSE	TRUE	TRUE	OROTIC ACID	hepatoprotectant, uricosuric agent	OC(=O)C1=CC(=O)NC(=O)N1
14030	759	0.358689	FALSE	TRUE	TRUE	SALICYLAMIDE	analgesic	NC(=O)C1=CC=CC=C1O
14030	833	0.360792	FALSE	TRUE	TRUE	LEVALBUTEROL HYDROCHLORIDE	bronchodilator, tocolytic	Cl.CC(C)(C)NC[C@H](O)C1=CC(CO)=C(O)C=C1
TM-L4	754	0.361306	FALSE	TRUE	TRUE	SHAM CONTROL	SHAM CONTROL	SHAM CONTROL
14030	695	0.361414	FALSE	TRUE	TRUE	TESTOSTERONE	androgen, antineoplastic	C[C@]12CCC3C(CCC4=CC(=O)CC[C@]34C)C1CC[C@@H]2O
14030	765	0.363866	FALSE	TRUE	TRUE	CYCLOSPORINE	immunosuppressant	CCC1NC(=O)C(C(O)C(C)C\C=C\C)N(C)C(=O)C(C(C)C)N(C)C(=O)C(CC(C)C)N(C)C(=O)C(CC(C)C)N(C)C(=O)C(C)NC(=O)C(C)NC(=O)C(CC(C)C)N(C)C(=O)C(NC(=O)C(CC(C)C)N(C)C(=O)CN(C)C1=O)C(C)C
TM-L4	741	0.36519	FALSE	TRUE	TRUE	Edaravone	Edaravone(MCI-186) is a potent new free radical scavenger used for the therapy of patients with acute brain infarction.	CC1=NN(C(=O)C1)C1=CC=CC=C1
TM-L4	735	0.366369	FALSE	TRUE	TRUE	Delafloxacin	Delafloxacin (RX-3341, ABT-492) is a fluoroquinolone antibiotic agent. It has potent inhibitory against levofloxacin-resistant Streptococcus pneumoniae strains (MIC: 0.0078-0.125 μg/ml).	C1C(CN1c1c(cc2c(c1Cl)n(cc(c2=O)C(=O)O)c1nc(c(cc1F)F)N)F)O
LOPAC	741	0.366467	FALSE	TRUE	TRUE	Hemicholinium-3	Potent and selective choline uptake blocker	[Br-].[Br-].C[N+]1(C)CCOC(O)(C1)C1=CC=C(C=C1)C1=CC=C(C=C1)C1(O)C[N+](C)(C)CCO1
14030	926	0.366739	FALSE	TRUE	TRUE	MEDRYSONE	glucocorticoid	C[C@H]1CC2C3CC[C@H](C(C)=O)[C@@]3(C)C[C@H](O)C2[C@@]2(C)CCC(=O)C=C12
14030	734	0.371911	FALSE	TRUE	TRUE	THIAMYLAL SODIUM	anesthetic	[Na+].CCCC(C)C1(CC=C)C(=O)NC([S-])=NC1=O
14030	890	0.374616	FALSE	TRUE	TRUE	HYDROXYZINE PAMOATE	anxiolytic, antihistaminic	OCCOCCN1CCN(CC1)C(C1=CC=CC=C1)C1=CC=C(Cl)C=C1.OC(=O)C1=C(O)C(CC2=C3C=CC=CC3=CC(C(O)=O)=C2O)=C2C=CC=CC2=C1
14030	725	0.375517	FALSE	TRUE	TRUE	CYTARABINE	antineoplastic, antiviral, antimetabolite	NC1=NC(=O)N(C=C1)C1O[C@H](CO)[C@@H](O)[C@@H]1O
14030	878	0.378897	FALSE	TRUE	TRUE	CARBENICILLIN DISODIUM	antibacterial	[Na+].[Na+].CC1(C)S[C@@H]2[C@H](NC(=O)C(C([O-])=O)C3=CC=CC=C3)C(=O)N2[C@H]1C([O-])=O
LOPAC	785	0.382934	FALSE	TRUE	TRUE	BRL 37344 sodium	Selective beta3 adrenoceptor agonist	CC(CC1=CC=C(OCC(=O)O[Na])C=C1)NCC(O)C1=CC(Cl)=CC=C1
L2300	830	0.384226	FALSE	TRUE	TRUE	AR-A 014418		C1(SC(=CN=1)[N+](=O)[O-])NC(NCC2=CC=C(C=C2)OC)=O
14030	633	0.384419	FALSE	TRUE	TRUE	ERGOCALCIFEROL	antirachitic vitamin	CC(C)[C@@H](C)\C=C\[C@@H](C)C1CC[C@H]2\C(CCC[C@]12C)=C\C=C1\C[C@@H](O)CCC1=C
LOPAC	728	0.385791	FALSE	TRUE	TRUE	7,7-Dimethyl-(5Z,8Z)-eicosadienoic acid	Phospholipase A2 and lipoxygenase inhibitor	CCCCCCCCCCC\C=C/C(C)(C)\C=C/CCCC(O)=O
L1200	824	0.386316	FALSE	TRUE	TRUE	PIK-293	PIK-293 is a PI3K inhibitor, mostly for PI3Kδ with IC50 of 0.24 μM, 500-, 100- and 50-fold less potent to PI3Kα/β/γ, respectively.	C1(N(C(C2=C(N=1)C=CC=C2C)=O)C3=C(C=CC=C3)C)CN4N=CC5=C4N=CN=C5N
14030	663	0.386353	FALSE	TRUE	TRUE	IBUPROFEN	antiinflammatory	CC(C)CC1=CC=C(C=C1)C(C)C(O)=O
LOPAC	807	0.389361	FALSE	TRUE	TRUE	SB 204741	5-HT2B serontonin receptor antagonist.	CN1C=CC2=CC(NC(=O)NC3=CC(C)=NS3)=CC=C12
LOPAC	797	0.389675	FALSE	TRUE	TRUE	Cinnarizine	Ca2+ channel blocker; central and peripheral vasodilator	C(\C=C\C1=CC=CC=C1)N1CCN(CC1)C(C1=CC=CC=C1)C1=CC=CC=C1
14030	946	0.390595	FALSE	TRUE	TRUE	FLUOCINOLONE ACETONIDE	glucocorticoid, antiinflammatory	CC1(C)O[C@@H]2CC3C4C[C@H](F)C5=CC(=O)C=C[C@]5(C)[C@@]4(F)[C@@H](O)C[C@]3(C)[C@@]2(O1)C(=O)CO
14030	752	0.390729	FALSE	TRUE	TRUE	PHTHALYLSULFATHIAZOLE	antibacterial	OC(=O)C1=CC=CC=C1C(=O)NC1=CC=C(C=C1)S(=O)(=O)NC1=NC=CS1
14030	872	0.390918	FALSE	TRUE	TRUE	ETHACRYNIC ACID	diuretic	CCC(=C)C(=O)C1=C(Cl)C(Cl)=C(OCC(O)=O)C=C1
14030	659	0.390965	FALSE	TRUE	TRUE	ALLOPURINOL	antihyperuricemia, antigout, antiurolithic	O=C1NC=NC2=C1C=NN2
TM-L4	719	0.39179	FALSE	TRUE	TRUE	Lansoprazole	Lansoprazole is a 2, 2, 2-trifluoroethoxypyridyl derivative of timoprazole that is used in the therapy of STOMACH ULCERS and ZOLLINGER-ELLISON SYNDROME. The drug inhibits H(+)-K(+)-EXCHANGING ATPASE which is found in GASTRIC PARIETAL CELLS.	Cc1c(OCC(F)(F)F)ccnc1CS(=O)c1nc2ccccc2[nH]1
LOPAC	758	0.392477	FALSE	TRUE	TRUE	Theophylline	Selective A1 adenosine receptor antagonist.	CC1C2=C(NC=N2)C(=O)N(C)C1=O
14030	712	0.39254	FALSE	TRUE	TRUE	OLSALAZINE SODIUM	antiinflammatory	[Na+].[Na+].OC1=C(C=C(C=C1)\N=N\C1=CC(C([O-])=O)=C(O)C=C1)C([O-])=O
14030	825	0.392847	FALSE	TRUE	TRUE	MEXENEONE	sunscreen	COC1=CC(O)=C(C=C1)C(=O)C1=CC=C(C)C=C1
14030	762	0.393671	FALSE	TRUE	TRUE	ERYTHROMYCIN	antibacterial	CC[C@H]1OC(=O)[C@H](C)[C@@H](O[C@H]2C[C@@](C)(OC)[C@@H](O)[C@H](C)O2)[C@H](C)[C@@H](O[C@@H]2O[C@H](C)C[C@@H]([C@H]2O)N(C)C)[C@](C)(O)C[C@@H](C)C(=O)[C@H](C)[C@@H](O)[C@]1(C)O
14030	698	0.39422	FALSE	TRUE	TRUE	1,4-NAPHTHOQUINONE	antibacterial, antineoplastic	O=C1C=CC(=O)C2=C1C=CC=C2
14030	727	0.394891	FALSE	TRUE	TRUE	DEMECLOCYCLINE HYDROCHLORIDE	antibacterial	Cl.CN(C)[C@H]1[C@@H]2C[C@@H]3[C@H](O)C4=C(C(O)=CC=C4Cl)C(=O)C3=C(O)[C@]2(O)C(=O)C(C(N)=O)=C1O
14030	793	0.395248	FALSE	TRUE	TRUE	XYLOMETAZOLINE HYDROCHLORIDE	adrenergic agonist, nasal decongestant	Cl.CC1=CC(=CC(C)=C1CC1=NCCN1)C(C)(C)C
14030	674	0.396603	FALSE	TRUE	TRUE	DEXCHLORPHENIRAMINE MALEATE	antihistamine	OC(=O)\C=C/C(O)=O.CN(C)CC[C@@H](C1=CC=C(Cl)C=C1)C1=CC=CC=N1
TM-L4	731	0.396622	FALSE	TRUE	TRUE	Halobetasol Propionate	Halobetasol Propionate is the propionate salt form of halobetasol, a synthetic corticosteroid with anti-inflammatory, antipruritic, and vasoconstrictor activities. Halobetasol, a topical steroid, diffuses across cell membranes to interact with cytoplasmic corticosteroid receptors located in both the dermal and intradermal cells, thereby activating gene expression of anti-inflammatory proteins med…	C(=O)(CC)O[C@@]1([C@H](C[C@H]2[C@@H]3C[C@@H](C4=CC(=O)C=C[C@@]4([C@]3([C@H](C[C@]12C)O)F)C)F)C)C(=O)CCl
TM-L4	788	0.397199	FALSE	TRUE	TRUE	Metaraminol bitartrate	Metaraminol bitartrate is a sympathomimetic agent that acts predominantly at alpha-1 adrenergic receptors. It has been used primarily as a vasoconstrictor in the treatment of HYPOTENSION.	O[C@H]([C@@H](O)C(O)=O)C(O)=O.C[C@H](N)[C@H](O)c1cccc(O)c1
L1200	787	0.397569	FALSE	TRUE	TRUE	PI-103	PI-103 is a multi-targeted PI3K inhibitor for p110α/β/δ/γ with IC50 of 2 nM/3 nM/3 nM/15 nM, less potent to mTOR/DNA-PK with IC50 of 30 nM/23 nM.	C12=C(N=C(N=C1N3CCOCC3)C4=CC=CC(=C4)O)C5=C(O2)N=CC=C5
L2300	743	0.398889	FALSE	TRUE	TRUE	GSK 650394		C1=CC=C(C=C1)C2=CN=C3C(=C2)C(=CN3)C4=CC=C(C(=C4)C5CCCC5)C(=O)O
LOPAC	777	0.39916	FALSE	TRUE	TRUE	Terfenadine	Non-sedating H1 histamine receptor antagonist	CC(C)(C)C1=CC=C(C=C1)C(O)CCCN1CCC(CC1)C(O)(C1=CC=CC=C1)C1=CC=CC=C1
14030	697	0.402482	FALSE	TRUE	TRUE	3-BENZYLOXY-4,4-BISNOR-8,11,13-PODOCARPATRIENE		C[C@]12CCC(CC1CCC1=C2C=CC=C1)OC(=O)C1=CC=CC=C1
LOPAC	782	0.40473	FALSE	TRUE	TRUE	(±)-threo-1-Phenyl-2-decanoylamino-3-morpholino-1-propanol hydrochloride	Glucosylceramide synthase inhibitor; blocks formation of glucosylceramide from ceramide	Cl.CCCCCCCCCC(=O)NC(CN1CCOCC1)[C@H](O)C1=CC=CC=C1
L2300	691	0.409414	FALSE	TRUE	TRUE	BD 1047		C1(C=C(C(=CC=1)Cl)Cl)CCN(CCN(C)C)C.Br.Br
L1200	812	0.409519	FALSE	TRUE	TRUE	Alisertib (MLN8237)	Alisertib (MLN8237) is a selective Aurora A inhibitor with IC50 of 1.2 nM. It has >200-fold higher selectivity for Aurora A than Aurora B. Phase 3.	C1=CC=C(C(=C1OC)C2=NCC3=C(C4=C2C=C(C=C4)Cl)N=C(N=C3)NC5=CC(=C(C=C5)C(O)=O)OC)F
14030	785	0.41052	FALSE	TRUE	TRUE	gamma-AMINOBUTYRIC ACID HYDROCHLORIDE	antihypertensive	Cl.NCCCC(O)=O
14030	595	0.41081	FALSE	TRUE	TRUE	PRAZOSIN HYDROCHLORIDE	antihypertensive	Cl.COC1=C(OC)C=C2C(N)=NC(=NC2=C1)N1CCN(CC1)C(=O)C1=CC=CO1
14030	817	0.412684	FALSE	TRUE	TRUE	3-HYDROXYFLAVONE		OC1=C(OC2=CC=CC=C2C1=O)C1=CC=CC=C1
TM-L4	714	0.413626	FALSE	TRUE	TRUE	Peramivir Trihydrate	Peramivir is a neuraminidase inhibitor (IC50: 0.09 nM) which prevents normal processing of virus particles such that virus particles are not released from infected cells. Peramivir is a cyclopentane derivative with activity against influenza A and B viruses.	O.O.O.CCC(CC)[C@H](NC(C)=O)[C@@H]1[C@H](O)[C@H](C[C@H]1NC(N)=N)C(O)=O
14030	879	0.413857	FALSE	TRUE	TRUE	MAFENIDE HYDROCHLORIDE	antibacterial	Cl.NCC1=CC=C(C=C1)S(N)(=O)=O
14030	866	0.414598	FALSE	TRUE	TRUE	GLUCOSAMINE HYDROCHLORIDE	antiarthritic	Cl.N[C@H]1[C@H](O)O[C@H](CO)[C@@H](O)[C@@H]1O
14030	758	0.415298	FALSE	TRUE	TRUE	DIGOXIGENIN	cardiotonic, positive inotropic activity	C[C@@]12[C@H](CC[C@]1(O)C1CC[C@@H]3C[C@@H](O)CC[C@]3(C)C1C[C@H]2O)C1=CC(=O)OC1
TM-L4	739	0.41674	FALSE	TRUE	TRUE	Ropivacaine	Ropivacaine is a local anaesthetic drug belonging to the amino amide group.	CCCN1CCCC[C@H]1C(=O)Nc1c(C)cccc1C
14030	686	0.417927	FALSE	TRUE	TRUE	CYCLOPHOSPHAMIDE	antineoplastic, alkylating agent	O.ClCCN(CCCl)P1(=O)NCCCO1
14030	766	0.418929	FALSE	TRUE	TRUE	PYROGALLIN	antiinfectant	OC1=C(O)C2=C(C=C1)C=CC=C(O)C2=O
14030	691	0.420453	FALSE	TRUE	TRUE	CHLORZOXAZONE	muscle relaxant (skeletal)	ClC1=CC2=C(OC(=O)N2)C=C1
LOPAC	715	0.420873	FALSE	TRUE	TRUE	Colchicine	Prevents tubulin polymerization	COC1=C(OC)C(OC)=C2C(CC[C@H](NC(C)=O)C3=CC(=O)C(OC)=CC=C23)=C1
14030	887	0.421468	FALSE	TRUE	TRUE	HYDROXYUREA	antineoplastic, inhibits ribonucleoside diphosphate reductase	NC(=O)NO
L2300	792	0.423938	FALSE	TRUE	TRUE	SHAM CONTROL	SHAM CONTROL	SHAM CONTROL
14030	825	0.424163	FALSE	TRUE	TRUE	CATECHIN PENTAACETATE		CC(=O)O[C@H]1CC2=C(OC(C)=O)C=C(OC(C)=O)C=C2O[C@@H]1C1=CC=C(OC(C)=O)C(OC(C)=O)=C1
14030	666	0.425423	FALSE	TRUE	TRUE	CARBINOXAMINE MALEATE	antihistaminic	OC(=O)\C=C/C(O)=O.CN(C)CCOC(C1=CC=C(Cl)C=C1)C1=CC=CC=N1
L2300	779	0.426739	FALSE	TRUE	TRUE	SHAM CONTROL	SHAM CONTROL	SHAM CONTROL
14030	766	0.430441	FALSE	TRUE	TRUE	LOMEFLOXACIN	antibacterial	NCCO.CCN1C=C(C(O)=O)C(=O)C2=CC(F)=C(N3CCNC(C)C3)C(F)=C12
14030	752	0.432438	FALSE	TRUE	TRUE	FENOTEROL HYDROBROMIDE	betaadrenergic agonist	Br.CC(CC1=CC=C(O)C=C1)NCC(O)C1=CC(O)=CC(O)=C1
14030	726	0.433037	FALSE	TRUE	TRUE	BACITRACIN	antibacterial	CCC(C)C(N)C1=NC(CS1)C(=O)NC(CC(C)C)C(=O)NC(CCC(O)=O)C(=O)NC(C(C)CC)C(=O)NCCCCC1NC(=O)C(CC(N)=O)NC(=O)C(CC(O)=O)NC(=O)C(CC2=CNC=N2)NC(=O)C(CC2=CC=CC=C2)NC(=O)C(NC(=O)C(CCCN)NC1=O)C(C)CC
14030	736	0.433726	FALSE	TRUE	TRUE	PICONOL	decongestant	OCC1=CC=CC=N1
TM-L4	792	0.434573	FALSE	TRUE	TRUE	serine	Serine is a non-essential amino acid in humans (synthesized by the body), Serine is present and functionally important in many proteins. With an alcohol group, serine is needed for the metabolism of fats, fatty acids, and cell membranes; muscle growth; and a healthy immune system. It also plays a major role in pyrimidine, purine, creatine, and porphyrin biosynthetic pathways. Serine is also found…	N[C@@H](CO)C(O)=O
TM-L4	753	0.435021	FALSE	TRUE	TRUE	Obeticholic Acid	Obeticholic acid is a Farnesoid X Receptor Agonist. The mechanism of action of obeticholic acid is as a Farnesoid X Receptor Agonist.	CC[C@@H]1[C@@H]2C[C@@H](CC[C@@]2([C@H]2CC[C@]3([C@H]([C@@H]2[C@@H]1O)CC[C@@H]3[C@H](C)CCC(=O)O)C)C)O
TM-L4	866	0.435297	FALSE	TRUE	TRUE	Cladribine	Cladribine, an adenosine deaminase inhibitor, is utilized in the treatment of lymphoproliferative diseases.	C1[C@@H]([C@H](O[C@H]1n1cnc2c1nc(nc2N)Cl)CO)O
14030	733	0.435321	FALSE	TRUE	TRUE	MITOMYCIN	antineoplastic	CO[C@@]12[C@@H]3NC3CN1C1=C([C@@H]2COC(N)=O)C(=O)C(N)=C(C)C1=O
L2300	785	0.439409	FALSE	TRUE	TRUE	Pentostatin		N1(C2=C([C@@H](CNC=N2)O)N=C1)[C@H]3O[C@@H]([C@@H](C3)O)CO
14030	721	0.440817	FALSE	TRUE	TRUE	AMINACRINE	local antiseptic	NC1=C2C=CC=CC2=NC2=CC=CC=C12
L1200	995	0.442108	FALSE	TRUE	TRUE	SB202190 (FHPI)	SB202190 (FHPI) is a potent p38 MAPK inhibitor targeting p38α/β with IC50 of 50 nM/100 nM, sometimes used instead of SB 203580 to investigate potential roles for SAPK2a/p38 in vivo.	C1=C(C=CC(=C1)C2N=C(NC=2C3=CC=NC=C3)C4=CC=C(C=C4)O)F
L1200	768	0.444375	FALSE	TRUE	TRUE	ZM 447439	ZM 447439 is a selective and ATP-competitive inhibitor for Aurora A and Aurora B with IC50 of 110 nM and 130 nM, respectively. It is more than 8-fold selective for Aurora A/B than MEK1, Src, Lck and has little effect againstCDK1/2/4, Plk1, Chk1, etc.	O1CCN(CC1)CCCOC2=C(C=C3C(=C2)N=CN=C3NC4=CC=C(C=C4)NC(=O)C5=CC=CC=C5)OC
L2300	781	0.447487	FALSE	TRUE	TRUE	LY2109761	LY2109761 is a novel selective TGF-β receptor type I/II (TβRI/II) dual inhibitor with Ki of 38 nM and 300 nM, respectively.	C12=C(C=C(C=C1)OCCN3CCOCC3)N=CC=C2C4C(=NN5C=4CCC5)C6=NC=CC=C6
14030	768	0.447639	FALSE	TRUE	TRUE	FENBUTYRAMIDE	antihypercholesterolemia	CCC(C(N)=O)C1=CC=CC=C1
14030	711	0.448537	FALSE	TRUE	TRUE	AMOXICILLIN	antibacterial	CC1(C)S[C@@H]2[C@H](NC(=O)[C@@H](N)C3=CC=C(O)C=C3)C(=O)N2[C@H]1C(O)=O
14030	791	0.448634	FALSE	TRUE	TRUE	FURALTADONE	antibacterial	[O-][N+](=O)C1=CC=C(O1)\C=N\N1CC(CN2CCOCC2)OC1=O
14030	734	0.449413	FALSE	TRUE	TRUE	FLUMEQUINE	antibacterial	CC1CCC2=CC(F)=CC3=C2N1C=C(C(O)=O)C3=O
14030	935	0.451094	FALSE	TRUE	TRUE	DANTHRON	cathartic	OC1=CC=CC2=C1C(=O)C1=C(C=CC=C1O)C2=O
L1200	852	0.451724	FALSE	TRUE	TRUE	NU6027	NU6027 is a potent ATR/CDK inhibitor, inhibits CDK1/2, ATR and DNA-PK with Ki of 2.5 μM/1.3 μM, 0.4 μM and 2.2 μM, enter cells more readily than the 6-aminopurine-based inhibitors.	C1CCCC(C1)COC2=NC(=NC(=C2N=O)N)N
L2300	717	0.454567	FALSE	TRUE	TRUE	C 646		C(C1C=CC(=CC=1)N2N=C(/C(C2=O)=C/C3OC(=CC=3)C4C(=CC(=C(C=4)C)C)[N+](=O)[O-])C)(=O)O
L1900	813	0.455917	FALSE	TRUE	TRUE	SHAM CONTROL	SHAM CONTROL	SHAM CONTROL
14030	660	0.455955	FALSE	TRUE	TRUE	CEPHAPIRIN SODIUM	antibacterial	[Na+].CC(=O)OCC1=C(N2[C@H](SC1)[C@H](NC(=O)CSC1=CC=NC=C1)C2=O)C([O-])=O
L1200	683	0.456717	FALSE	TRUE	TRUE	HMN-214	HMN-214 is a prodrug of HMN-176, which alters the cellular spatial orientation of Plk1.	C1=CC=CC(=C1N(S(C2=CC=C(C=C2)OC)(=O)=O)C(C)=O)/C=C/C3=CC=[N+](C=C3)[O-]
14030	930	0.457935	FALSE	TRUE	TRUE	CLINDAMYCIN HYDROCHLORIDE	antibacterial, inhibits protein synthesis	Cl.CCC[C@@H]1C[C@H](N(C)C1)C(=O)N[C@H]([C@H](C)Cl)C1O[C@H](SC)[C@H](O)[C@@H](O)[C@H]1O
14030	700	0.45831	FALSE	TRUE	TRUE	DIATRIZOIC ACID	radiopaque agent	CC(=O)NC1=C(I)C(C(O)=O)=C(I)C(NC(C)=O)=C1I
14030	976	0.459162	FALSE	TRUE	TRUE	ETHOPROPAZINE HYDROCHLORIDE	antiparkinsonian, anticholinergic	Cl.CCN(CC)C(C)CN1C2=C(SC3=C1C=CC=C3)C=CC=C2
14030	924	0.464911	FALSE	TRUE	TRUE	DIETHYLSTILBESTROL	estrogen	CC\C(=C(\CC)C1=CC=C(O)C=C1)C1=CC=C(O)C=C1
TM-L4	763	0.465345	FALSE	TRUE	TRUE	Paromomycin Sulfate	Paromomycin binds specifically to the RNA oligonucleotide at the A site of bacterial 30S ribosomes, thereby causing misreading and premature termination of translation of mRNA and inhibition of protein synthesis followed by cell death. Paromomycin Sulfate is the sulfate salt form of paromomycin, a structural derivative of neomycin, an aminoglycoside antibiotic with amebicidal and bactericidal eff…	OS(O)(=O)=O.NC[C@@H]1O[C@H](O[C@@H]2[C@@H](CO)O[C@@H](O[C@@H]3[C@@H](O)[C@H](N)C[C@H](N)[C@H]3O[C@H]3O[C@H](CO)[C@@H](O)[C@H](O)[C@H]3N)[C@@H]2O)[C@H](N)[C@@H](O)[C@@H]1O
L2300	697	0.465793	FALSE	TRUE	TRUE	Belinostat (PXD101)	Belinostat (PXD101) is a novel HDAC inhibitor with IC50 of 27 nM in HeLa cell extracts.	C1(=CC=CC(=C1)/C=C/C(NO)=O)S(NC2=CC=CC=C2)(=O)=O
L2300	653	0.466642	FALSE	TRUE	TRUE	TAK-733	TAK-733 is a potent, selective, non ATP-competitive MEK inhibitor with IC50 of 3.2 nM.	N1(C=NC2=C(C1=O)C(=C(C(N2C)=O)F)NC3=CC=C(C=C3F)I)C[C@@H](O)CO
L2300	832	0.466878	FALSE	TRUE	TRUE	Amuvatinib (MP-470)	MP-470 (Amuvatinib) is a potent and multi-targeted inhibitor of c-KitD816H, PDGFαV561D and Flt3D835Y with IC50 of 10 nM, 40 nM and 81 nM, respectively.	C1=CC=C2C(=C1)C3=C(O2)C(=NC=N3)N4CCN(CC4)C(=S)NCC5=CC=C6C(=C5)OCO6
L1200	736	0.46921	FALSE	TRUE	TRUE	Tyrphostin AG 879	Tyrphostin AG 879 potently inhibits HER2/ErbB2 with IC50 of 1 μM, 100- and 500-fold higher selective to ErbB2 than PDGFR and EGFR.	C(/C(=C/C1C=C(C(=C(C=1)C(C)(C)C)O)C(C)(C)C)C#N)(N)=S
LOPAC	740	0.469729	FALSE	TRUE	TRUE	gamma-Acetylinic GABA	GABA transaminase (GABA-T) inhibitor	NC(CCC(O)=O)C#C
LOPAC	713	0.472856	FALSE	TRUE	TRUE	Trimethoprim	Potent inhibitor of bacterial and protozoal dihydrofolate reductase	COC1=CC(CC2=CN=C(N)N=C2N)=CC(OC)=C1OC
14030	742	0.47359	FALSE	TRUE	TRUE	ETHAMBUTOL HYDROCHLORIDE	antibacterial (tuberculostatic)	Cl.Cl.CC[C@@H](CO)NCCN[C@@H](CC)CO
14030	675	0.473805	FALSE	TRUE	TRUE	CEPHRADINE	antibacterial	CC1=C(N2C(SC1)[C@H](NC(=O)[C@H](N)C1=CCC=CC1)C2=O)C(O)=O
L2300	728	0.474746	FALSE	TRUE	TRUE	Bleomycin sulfate	Bleomycin sulfate (Blenoxane) is a glycopeptide antibiotic and an anticancer agent for squamous cell carcinomas (SCC) with IC50 of 4 nM in UT-SCC-19A cells.	S(=O)(=O)(O)[O-].[C@H](C(C1N=CNC=1)O[C@@H]2[C@@]([C@@H]([C@H]([C@H](O2)CO)O)O)(O[C@@H]3[C@H]([C@H]([C@@H]([C@H](O3)CO)O)OC(N)=O)O)[H])(C(N[C@H]([C@@H]([C@H](C(N[C@H]([C@@H](C)O)C(NCCC4=NC(=CS4)C5=NC(=CS5)C(NCCC[S+](C)C)=O)=O)=O)C)O)C)=O)NC(C6N=C(N=C(C=6C)N)[C@@H](NC[C@H](C(N)=O)N)CC(N)=O)=O
14030	740	0.475455	FALSE	TRUE	TRUE	SHAM CONTROL	SHAM CONTROL	SHAM CONTROL
LOPAC	761	0.475591	FALSE	TRUE	TRUE	Ro 41-0960	Specific, reversible, orally-active COMT-inhibitor	OC1=CC(=CC(=C1O)[N+]([O-])=O)C(=O)C1=CC=CC=C1F
LOPAC	766	0.475591	FALSE	TRUE	TRUE	SC-51089 hydrate	SC-51089 hydrate is a selective prostaglandin E2 (EP1) receptor antagonist	O.Cl.ClC1=CC2=C(OC3=CC=CC=C3CN2C(=O)NNC(=O)CCC2=CC=NC=C2)C=C1
TM-L4	737	0.475928	FALSE	TRUE	TRUE	Temozolomide	Temozolomide is a DNA alkylating agent interfering with DNA replication.	Cn1nnc2c(ncn2c1=O)C(N)=O
LOPAC	800	0.476904	FALSE	TRUE	TRUE	Captopril	Angiotensin-converting enzyme (ACE) inhibitor; antihypertensive	C[C@H](CS)C(=O)N1CCC[C@H]1C(O)=O
14030	714	0.477887	FALSE	TRUE	TRUE	5-METHYLHYDANTOIN		CC1NC(=O)NC1=O
14030	731	0.479313	FALSE	TRUE	TRUE	CEFOPERAZONE	antibacterial	CCN1CCN(C(=O)NC(C(=O)NC2C3SCC(CSC4=NN=NN4C)=C(N3C2=O)C(O)=O)C2=CC=C(O)C=C2)C(=O)C1=O
14030	817	0.479921	FALSE	TRUE	TRUE	SECNIDAZOLE	antiameobic, antitrichomonas	CC(O)CN1C(C)=NC=C1[N+]([O-])=O
14030	737	0.482812	FALSE	TRUE	TRUE	OXETHAZAINE	anesthetic (local)	CN(C(=O)CN(CCO)CC(=O)N(C)C(C)(C)CC1=CC=CC=C1)C(C)(C)CC1=CC=CC=C1
LOPAC	761	0.482999	FALSE	TRUE	TRUE	Ciprofibrate	Peroxizome proliferator;specific ligand for the nuclear peroxisome proliferator-activated receptor alpha (PPARalpha)	CC(C)(OC1=CC=C(C=C1)C1CC1(Cl)Cl)C(O)=O
14030	970	0.484024	FALSE	TRUE	TRUE	EUGENOL	analgesic (topical), antiseptic, antifungal	COC1=CC(CC=C)=CC=C1O
L2300	749	0.485491	FALSE	TRUE	TRUE	Tosedostat (CHR2797)	CHR-2797 is an aminopeptidase inhibitor for LAP, PuSA and Aminopeptidase N with IC50 of 100 nM, 150 nM and 220 nM, respectively.	[C@@H]([C@@H](C(=O)NO)O)(C(=O)N[C@H](C(OC1CCCC1)=O)C2=CC=CC=C2)CC(C)C
14030	722	0.485925	FALSE	TRUE	TRUE	CYCLOSERINE (D)	antibacterial (tuberculostatic)	N[C@@H]1CONC1=O
L2300	713	0.486527	FALSE	TRUE	TRUE	Celecoxib	Celecoxib is a selective COX-2 inhibitor with IC50 of 40 nM.	C1(=CC=C(C=C1)S(N)(=O)=O)N2C(=CC(=N2)C(F)(F)F)C3=CC=C(C=C3)C
TM-L4	817	0.487235	FALSE	TRUE	TRUE	SHAM CONTROL	SHAM CONTROL	SHAM CONTROL
14030	757	0.488111	FALSE	TRUE	TRUE	DIMETHYL SULFOXIDE	analgesic, antiinflammatory (topical)	CS(C)=O
L2300	705	0.48945	FALSE	TRUE	TRUE	Cyt387	CYT387 is an ATP-competitive inhibitor of JAK1 and JAK2 with IC50 of 11 nM and 18 nM, respectively.	C1=C(C=CC(=C1)NC2=NC=CC(=N2)C3=CC=C(C=C3)C(NCC#N)=O)N4CCOCC4
L2300	853	0.491989	FALSE	TRUE	TRUE	CYC116	CYC116 is a potent inhibitor of Aurora A/B and VEGFR with Ki of 8.0 nM/9.2 nM and 44 nM, respectively.	C1(=NC=CC(=N1)C2SC(=NC=2C)N)NC3=CC=C(C=C3)N4CCOCC4
14030	735	0.492271	FALSE	TRUE	TRUE	THEAFLAVIN MONOGALLATES		O[C@@H]1CC2=C(O[C@@H]1C1=C3C=C(C=C(O)C(=O)C3=C(O)C(O)=C1)[C@H]1OC3=C(C[C@H]1OC(=O)C1=CC(O)=C(O)C(O)=C1)C(O)=CC(O)=C3)C=C(O)C=C2O
14030	729	0.492573	FALSE	TRUE	TRUE	CHLOROACETOXYQUINOLINE	antibacterial, antidiarrheal, promotes neovascularization, facin pathway enhancer	CC(=O)OC1=C2N=CC=CC2=C(Cl)C=C1
LOPAC	759	0.492588	FALSE	TRUE	TRUE	IRAK-1/4 Inhibitor I	A novel benzimidazole that is a potent inhibitor of interleukin-1 receptor-associated kinases 1/4 (IRAK 1/4).	[O-][N+](=O)C1=CC=CC(=C1)C(=O)NC1=NC2=CC=CC=C2N1CCN1CCOCC1
TM-L4	813	0.492882	FALSE	TRUE	TRUE	SHAM CONTROL	SHAM CONTROL	SHAM CONTROL
LOPAC	692	0.494142	FALSE	TRUE	TRUE	GW9508	GW9508 is a selective FFA1/GPR40 agonist	OC(=O)CCC1=CC=C(NCC2=CC(OC3=CC=CC=C3)=CC=C2)C=C1
14030	886	0.494249	FALSE	TRUE	TRUE	ISOPROTERENOL HYDROCHLORIDE	bronchodilator	Cl.CC(C)NCC(O)C1=CC(O)=C(O)C=C1
14030	616	0.49805	FALSE	TRUE	TRUE	METHACHOLINE CHLORIDE	cholinergic, diagnostic aid	[Cl-].CC(C[N+](C)(C)C)OC(C)=O
14030	717	0.498419	FALSE	TRUE	TRUE	CHLORAMPHENICOL PALMITATE	antibacterial, antirickettsial	CCCCCCCCCCCCCCCC(=O)OC[C@H](NC(=O)C(Cl)Cl)[C@H](O)C1=CC=C(C=C1)[N+]([O-])=O
LOPAC	703	0.49927	FALSE	TRUE	TRUE	WB-4101 hydrochloride	alpha1A Adrenoceptor antagonist	Cl.COC1=CC=CC(OC)=C1OCCNCC1COC2=C(O1)C=CC=C2
14030	741	0.500755	FALSE	TRUE	TRUE	SULFISOXAZOLE	antibacterial	CC1=NOC(NS(=O)(=O)C2=CC=C(N)C=C2)=C1C
TM-L4	729	0.501699	FALSE	TRUE	TRUE	Dithiopropanol	An anti-gas warfare agent that is effective against Lewisite (dichloro(2-chlorovinyl)arsine) and formerly known as British Anti-Lewisite or BAL. It acts as a chelating agent and is used in the treatment of arsenic, gold, and other heavy metal poisonings.	OCC(S)CS
TM-L4	759	0.502924	FALSE	TRUE	TRUE	Imatinib	matinib is an inhibitor of the receptor tyrosine kinases c-Abl, Bcr-Abl, PDGFR, and c-Kit (IC50: 600/100/100 nM).	CN1CCN(Cc2ccc(cc2)C(=O)Nc2ccc(C)c(Nc3nccc(n3)-c3cccnc3)c2)CC1
14030	822	0.505977	FALSE	TRUE	TRUE	ATROPINE SULFATE	anticholinergic, mydriatic	OS(O)(=O)=O.CN1C2CCC1CC(C2)OC(=O)C(CO)C1=CC=CC=C1
LOPAC	755	0.506399	FALSE	TRUE	TRUE	Tetradecylthioacetic acid	Peroxisome proliferator-activated receptor (PPAR)-alpha agonist	CCCCCCCCCCCCCCSCC(O)=O
14030	795	0.507552	FALSE	TRUE	TRUE	TOREMIFENE CITRATE	antineoplastic, anti-estrogen	OC(=O)CC(O)(CC(O)=O)C(O)=O.CN(C)CCOC1=CC=C(C=C1)C(=C(\CCCl)C1=CC=CC=C1)\C1=CC=CC=C1
L1900	790	0.508236	FALSE	TRUE	TRUE	SHAM CONTROL	SHAM CONTROL	SHAM CONTROL
14030	722	0.509046	FALSE	TRUE	TRUE	URACIL	antineoplastic	O=C1NC=CC(=O)N1
14030	912	0.511129	FALSE	TRUE	TRUE	PHENACEMIDE	anticonvulsant	NC(=O)NC(=O)CC1=CC=CC=C1
L1200	814	0.511662	FALSE	TRUE	TRUE	WZ4003	WZ4003 is a highly specific NUAK kinase inhibitor with IC50 of 20 nM and 100 nM for NUAK1 and NUAK2, respectively, without significant inhibition on 139 other kinases.	N1=C(N=C(C(=C1)Cl)OC2=CC(=CC=C2)NC(CC)=O)NC3=C(C=C(C=C3)N4CCN(CC4)C)OC
TM-L4	776	0.514916	FALSE	TRUE	TRUE	SHAM CONTROL	SHAM CONTROL	SHAM CONTROL
14030	739	0.515301	FALSE	TRUE	TRUE	CLOXACILLIN SODIUM	antibacterial	[Na+].CC1=C(C(=O)N[C@H]2[C@H]3SC(C)(C)[C@@H](N3C2=O)C([O-])=O)C(=NO1)C1=C(Cl)C=CC=C1
LOPAC	755	0.515811	FALSE	TRUE	TRUE	9-cyclopentyladenine	Cell-permeable, non-competitive adenylyl cyclase inhibitor; targets the P-site domain	CS(O)(=O)=O.NC1=C2N=CN(C3CCCC3)C2=NC=N1
14030	822	0.516691	FALSE	TRUE	TRUE	CINCHONIDINE	antimalarial	O[C@@H]([C@@H]1C[C@@H]2CC[N@]1C[C@@H]2C=C)C1=CC=NC2=CC=CC=C12
LOPAC	735	0.518435	FALSE	TRUE	TRUE	Demeclocycline hydrochloride	Tetracycline antibiotic; interferes with protein synthesis	Cl.CN(C)[C@H]1[C@@H]2C[C@@H]3[C@H](O)C4=C(Cl)C=CC(O)=C4C(=O)C3=C(O)[C@]2(O)C(=O)C(C(N)=O)=C1O
LOPAC	873	0.518547	FALSE	TRUE	TRUE	DL-Thiorphan	Enkephalinase inhibitor	OC(=O)CNC(=O)C(CS)CC1=CC=CC=C1
14030	772	0.518564	FALSE	TRUE	TRUE	D-PHENYLALANINE	antidepressant	Cl.N[C@H](CC1=CC=CC=C1)C(O)=O
TM-L4	823	0.520167	FALSE	TRUE	TRUE	Pretomanid	PA-824, a nitroimidazole, is used as an anti-tuberculosis drug for tuberculosis with MIC less than 2.8 μM.	C1[C@@H](COc2nc(cn12)[N+](=O)[O-])OCc1ccc(cc1)OC(F)(F)F
LOPAC	678	0.522502	FALSE	TRUE	TRUE	DL-Buthionine-[S,R]-sulfoximine	Glutathione synthesis inhibitor	CCCCS(=N)(=O)CCC(N)C(O)=O
TM-L4	701	0.522839	FALSE	TRUE	TRUE	Dalasetron Mesylate Hydrate	Dolasetron mesylate, a selective serotonin receptor antagonist, competitively blocks the action of serotonin at 5HT3 receptors, resulting in suppression of chemotherapy- and radiotherapy-induced nausea and vomiting.	O.CS(O)(=O)=O.O=C(O[C@H]1C[C@H]2C[C@@H]3C[C@@H](C1)N2CC3=O)c1c[nH]c2ccccc12
14030	962	0.525393	FALSE	TRUE	TRUE	FLUDROCORTISONE ACETATE	mineralocorticoid	CC(=O)OCC(=O)[C@@]1(O)CCC2C3CCC4=CC(=O)CC[C@]4(C)[C@@]3(F)[C@@H](O)C[C@]12C
14030	762	0.526576	FALSE	TRUE	TRUE	SODIUM SALICYLATE	keratolytic	[Na+].OC1=CC=CC=C1C([O-])=O
14030	711	0.527022	FALSE	TRUE	TRUE	BUTAMBEN	anesthetic (local); inhibitor of DRG IA/Kv4.2 current	CCCCOC(=O)C1=CC=C(N)C=C1
14030	767	0.527691	FALSE	TRUE	TRUE	ANTIAROL		COC1=CC(O)=CC(OC)=C1OC
LOPAC	788	0.52936	FALSE	TRUE	TRUE	Biperiden hydrochloride	Non-selective muscarinic acetylcholine receptor antagonist; antiparkinsonian	Cl.OC(CCN1CCCCC1)(C1CC2CC1C=C2)C1=CC=CC=C1
14030	763	0.530317	FALSE	TRUE	TRUE	CEPHARANTHINE	antineoplastic, hepatoprotectant, radiopropective	COC1=CC2=C3C=C1OC1=C4OCOC4=CC4=C1[C@H](CC1=CC=C(OC5=C(OC)C=CC(C[C@H]3N(C)CC2)=C5)C=C1)N(C)CC4
TM-L4	697	0.533897	FALSE	TRUE	TRUE	L-Glutamine	L-glutamine, a non-essential amino acid, is synthesized from glutamic acid and ammonia.	C(=O)([C@@H](N)CCC(=O)N)O
LOPAC	695	0.535451	FALSE	TRUE	TRUE	Aminophylline ethylenediamine	A1/A2 adenosine receptor antagonist; diuretic; cardiac stimulant; smooth muscle relaxant	NCCN.CN1C2=C(NC=N2)C(=O)N(C)C1=O.CN1C2=C(NC=N2)C(=O)N(C)C1=O
TM-L4	797	0.538116	FALSE	TRUE	TRUE	Ixabepilone	Ixabepilone is an orally bioavailable microtubule inhibitor. It binds to tubulin and promotes tubulin polymerization and microtubule stabilization, thereby arresting cells in the G2-M phase of the cell cycle and inducing tumor cell apoptosis.	C[C@H]1CCC[C@@]2([C@@H](O2)C[C@H](NC(=O)C[C@@H](C(C(=O)[C@@H]([C@H]1O)C)(C)C)O)/C(=C/C3=CSC(=N3)C)/C)C
14030	708	0.538374	FALSE	TRUE	TRUE	DEACETOXY-7-OXOGEDUNIN		CC1(C)C2CC(=O)[C@]3(C)C(CC[C@@]4(C)[C@@H](OC(=O)[C@H]5O[C@@]345)C3=COC=C3)[C@@]2(C)C=CC1=O
LOPAC	723	0.538831	FALSE	TRUE	TRUE	Propantheline bromide	Muscarinic acetylcholine receptor antagonist; antispasmodic	[Br-].CC(C)[N+](C)(CCOC(=O)C1C2=CC=CC=C2OC2=C1C=CC=C2)C(C)C
14030	615	0.53947	FALSE	TRUE	TRUE	PHENYTOIN SODIUM	anticonvulsant, antieleptic	[Na+].O=C1NC(C(=O)[N-]1)(C1=CC=CC=C1)C1=CC=CC=C1
LOPAC	738	0.546219	FALSE	TRUE	TRUE	Isoliquiritigenin	Soluble guanylyl cyclase activator and aldose reductase inhibitor	OC1=CC=C(\C=C\C(=O)C2=C(O)C=C(O)C=C2)C=C1
14030	704	0.549568	FALSE	TRUE	TRUE	ESTRONE	estrogen	C[C@]12CCC3C(CCC4=C3C=CC(O)=C4)C1CCC2=O
TM-L4	697	0.550442	FALSE	TRUE	TRUE	Telbivudine	Telbivudine is a Hepatitis B Virus Nucleoside Analog Reverse Transcriptase Inhibitor. The mechanism of action of telbivudine is as a Nucleoside Reverse Transcriptase Inhibitor. The chemical classification of telbivudine is Nucleoside Analog.	c1(=O)[nH]c(=O)c(cn1[C@H]1O[C@H]([C@H](O)C1)CO)C
14030	715	0.550844	FALSE	TRUE	TRUE	SERATRODAST	Thx-antagonist, antiasthmatic, antiinflammatory	CC1=C(C)C(=O)C(C(CCCCCC(O)=O)C2=CC=CC=C2)=C(C)C1=O
14030	770	0.551617	FALSE	TRUE	TRUE	7,4'-DIHYDROXYFLAVONE	antioxidant	OC1=CC=C(C=C1)C1=CC(=O)C2=C(O1)C=C(O)C=C2
LOPAC	684	0.552821	FALSE	TRUE	TRUE	Pifithrin-mu	Anti-apoptotic; inhibits p53 binding to mitochodria as well as Bcl-xL and Bcl-2 proteins. Does not affect transcriptional functions of p53.	NS(=O)(=O)C#CC1=CC=CC=C1
LOPAC	781	0.553562	FALSE	TRUE	TRUE	Trihexyphenidyl hydrochloride	Muscarinic acetylcholine receptor antagonist; centrally acting anticholinergic	Cl.OC(CCN1CCCCC1)(C1CCCCC1)C1=CC=CC=C1
14030	706	0.555161	FALSE	TRUE	TRUE	AMILORIDE HYDROCHLORIDE	Na+ channel inhibitor, diuretic	Cl.NC(=N)NC(=O)C1=C(N)N=C(N)C(Cl)=N1
LOPAC	809	0.556513	FALSE	TRUE	TRUE	(-)-Sulpiride	D2 dopamine receptor antagonist; antipsychotic	CCN1CCC[C@H]1CNC(=O)C1=C(OC)C=CC(=C1)S(N)(=O)=O
TM-L4	700	0.556891	FALSE	TRUE	TRUE	Lincomycin hydrochloride monohydrate	Lincomycin hydrochloride is an antibiotic produced by Streptomyces lincolnensis var. lincolnensis. It has been used in the treatment of staphylococcal, streptococcal, and Bacteroides fragilis infections.	[C@H]1(C[C@H](N(C1)C)C(=O)N[C@H]([C@@H](C)O)[C@H]1O[C@@H]([C@@H]([C@H]([C@H]1O)O)O)SC)CCC.Cl.O
LOPAC	553	0.55886	FALSE	TRUE	TRUE	Nocodazole	Disrupts microtubules by binding to beta-tubulin	COC(=O)NC1=NC2=CC(=CC=C2N1)C(=O)C1=CC=CS1
TM-L4	733	0.559858	FALSE	TRUE	TRUE	Sulfinpyrazone	Sulfinpyrazone is a uricosuric drug that is used to reduce the serum urate levels in gout therapy. It lacks anti-inflammatory, analgesic, and diuretic properties.	O=C1C(CCS(=O)c2ccccc2)C(=O)N(N1c1ccccc1)c1ccccc1
L2300	779	0.56097	FALSE	TRUE	TRUE	LG 100268		C1(C2C=C3C(=CC=2C)C(CCC3(C)C)(C)C)(C4N=CC(=CC=4)C(O)=O)CC1
14030	727	0.562307	FALSE	TRUE	TRUE	DICTAMNINE	antifungal, vasal relaxant, smooth muscle contractant	COC1=C2C=COC2=NC2=C1C=CC=C2
14030	777	0.562341	FALSE	TRUE	TRUE	PIROCTONE OLAMINE	antiseborrheic	CC(N)O.CC(CC1=CC(C)=CC(=O)N1O)CC(C)(C)C
L2300	756	0.564156	FALSE	TRUE	TRUE	SHAM CONTROL	SHAM CONTROL	SHAM CONTROL
TM-L4	683	0.564238	FALSE	TRUE	TRUE	Cisplatin	Cisplatin, a DNA-crosslinking agent, is able to suppress DNA synthesis by conforming DNA adducts in cancer cells.	N.N.Cl[Pt]Cl
14030	905	0.564644	FALSE	TRUE	TRUE	METHOCARBAMOL	muscle relaxant (skeletal)	COC1=CC=CC=C1OCC(O)COC(N)=O
14030	664	0.565268	FALSE	TRUE	TRUE	CEFADROXIL	antibacterial	CC1=C(N2[C@H](SC1)[C@H](NC(=O)C(N)C1=CC=C(O)C=C1)C2=O)C(O)=O
14030	594	0.567216	FALSE	TRUE	TRUE	EMETINE DIHYDROCHLORIDE	inhibits RNA, DNA and protein synthesis	Cl.Cl.CC[C@H]1CN2CCC3=C(C=C(OC)C(OC)=C3)C2C[C@@H]1CC1NCCC2=C1C=C(OC)C(OC)=C2
14030	820	0.567941	FALSE	TRUE	TRUE	ZAPRINAST	cGMP phosphodiesterase inhibitor	CCCOC1=CC=CC=C1C1=NC2=C(N=NN2)C(=O)N1
14030	704	0.569813	FALSE	TRUE	TRUE	CRESOL	antiinfectant	CC1=CC=C(O)C=C1
14030	775	0.576383	FALSE	TRUE	TRUE	TRYPTOPHAN (L)	antidepressant, nutrient; LD50(rat) 1634 mg/kg ip	N[C@@H](CC1=CNC2=C1C=CC=C2)C(O)=O
14030	704	0.577517	FALSE	TRUE	TRUE	EVANS BLUE	glutamate uptake inhibitor, AMPA blocker	[Na+].[Na+].[Na+].[Na+].CC1=CC(=CC=C1\N=N\C1=CC=C2C(=CC(=C(N)C2=C1O)S([O-])(=O)=O)S([O-])(=O)=O)C1=CC(C)=C(C=C1)\N=N\C1=CC=C2C(=CC(=C(N)C2=C1O)S([O-])(=O)=O)S([O-])(=O)=O
LOPAC	853	0.57812	FALSE	TRUE	TRUE	SKF-89145 hydrobromide	D1 dopamine receptor agonist	Br.CN1CC(C2=C(C1)SC=C2)C1=CC=C(O)C(O)=C1
14030	751	0.578573	FALSE	TRUE	TRUE	ESTRADIOL METHYL ETHER	estrogen	COC1=CC2=C(C=C1)C1CC[C@]3(C)[C@@H](O)CCC3C1CC2
14030	755	0.57907	FALSE	TRUE	TRUE	METHOXAMINE HYDROCHLORIDE	alpha1 adrenoreceptor agonist, vasoconstrictor	Cl.COC1=CC=C(OC)C(=C1)C(O)C(C)N
14030	815	0.580028	FALSE	TRUE	TRUE	FIPEXIDE HYDROCHLORIDE	psychostimulant	Cl.ClC1=CC=C(OCC(=O)N2CCN(CC3=CC=C4OCOC4=C3)CC2)C=C1
L2300	746	0.580799	FALSE	TRUE	TRUE	Medroxyprogesterone acetate	Medroxyprogesterone acetate is a progestin, a synthetic variant of the human hormone progesterone and a potent progesterone receptor agonist.	C1C(C=C2[C@](C1)([C@]3([C@@](C[C@@H]2C)([C@]4([C@](CC3)([C@@](CC4)(C(=O)C)OC(C)=O)C)[H])[H])[H])C)=O
L1900	791	0.581159	FALSE	TRUE	TRUE	GSK1070916	GSK1070916 is a reversible and ATP-competitive inhibitor of Aurora B/C with IC50 of 3.5 nM/6.5 nM. It displays >100-fold selectivity against the closely related Aurora A-TPX2 complex. Phase 1.	C1=CN=C2C(=C1C3=CN(N=C3C4=CC=C(C=C4)NC(N(C)C)=O)CC)C=C(N2)C5=CC=CC(=C5)CN(C)C
14030	564	0.582065	FALSE	TRUE	TRUE	MINOCYCLINE HYDROCHLORIDE	antibacterial	Cl.CN(C)[C@H]1[C@@H]2C[C@@H]3CC4=C(C(O)=CC=C4N(C)C)C(=O)C3=C(O)[C@]2(O)C(=O)C(C(N)=O)=C1O
14030	694	0.582134	FALSE	TRUE	TRUE	NORGESTREL	progestogen	CCC12CCC3C(CCC4=CC(=O)CC[C@H]34)C1CC[C@@]2(O)C#C
TM-L4	754	0.584041	FALSE	TRUE	TRUE	SHAM CONTROL	SHAM CONTROL	SHAM CONTROL
L1900	791	0.584566	FALSE	TRUE	TRUE	RGFP966	RGFP966 is an HDAC3 inhibitor with IC50 of 0.08 μM, exhibits > 200-fold selectivity over other HDAC.	C1(=CC=C(C=C1N)F)NC(/C=C/C2C=NN(C=2)C/C=C/C3=CC=CC=C3)=O
14030	937	0.58556	FALSE	TRUE	TRUE	METHYLPREDNISOLONE	glucocorticoid	C[C@H]1CC2C3CC[C@](O)(C(=O)CO)[C@@]3(C)C[C@H](O)C2[C@@]2(C)C=CC(=O)C=C12
14030	812	0.585774	FALSE	TRUE	TRUE	ZINC UNDECYLENATE [4mM]	antifungal	[Zn++].NCCO.NCCO.[O-]C(=O)CCCCCCCCC=C.[O-]C(=O)CCCCCCCCC=C
14030	726	0.585788	FALSE	TRUE	TRUE	AMINOGLUTETHIMIDE	aromatase inhibitor, antineoplastic, testosterone suppressant	CCC1(CCC(=O)NC1=O)C1=CC=C(N)C=C1
L2300	629	0.587652	FALSE	TRUE	TRUE	CAL-101 (GS-1101)	CAL-101 is a selective PI3K class I inhibitor of p110δ with IC50 of 2.5 nM.	C1=CC=C2C(=C1F)C(N(C(=N2)[C@@H](NC3=C4C(=NC=N3)NC=N4)CC)C5=CC=CC=C5)=O
14030	869	0.589428	FALSE	TRUE	TRUE	BETAMETHASONE VALERATE	glucocorticoid	CCCCC(=O)O[C@@]1([C@@H](C)CC2C3CCC4=CC(=O)C=C[C@]4(C)[C@@]3(F)C(O)C[C@]12C)C(=O)CO
TM-L4	727	0.590108	FALSE	TRUE	TRUE	Solifenacin succinate	Solifenacin succinate is a quinuclidine and tetrahydroisoquinoline derivative and selective M3 MUSCARINIC ANTAGONIST. It is used as a UROLOGIC AGENT in the treatment of URINARY INCONTINENCE.	O(C(=O)N1[C@H](c2c(CC1)cccc2)c1ccccc1)[C@@H]1C2CCN(C1)CC2.O=C(O)CCC(=O)O
14030	875	0.592736	FALSE	TRUE	TRUE	NEOMYCIN SULFATE	antibacterial	OS(O)(=O)=O.NC[C@@H]1O[C@H](O[C@@H]2[C@@H](CO)OC(O[C@@H]3[C@@H](O)[C@H](N)C[C@H](N)[C@H]3OC3O[C@H](CN)[C@@H](O)[C@H](O)[C@H]3N)[C@@H]2O)[C@H](N)[C@@H](O)[C@@H]1O
LOPAC	768	0.595908	FALSE	TRUE	TRUE	T0070907	T0070907 is very similar in structure and activity to the PPARgamma antagonist GW9662. T0070907 is more potent and has higher selectivity for PPAR-gamma over all other subtypes (about 800-fold)	[O-][N+](=O)C1=CC(C(=O)NC2=CC=NC=C2)=C(Cl)C=C1
LOPAC	742	0.595924	FALSE	TRUE	TRUE	L-Glutamic acid hydrochloride	Endogenous excitatory amino acid neurotransmitter	Cl.N[C@@H](CCC(O)=O)C(O)=O
LOPAC	838	0.597911	FALSE	TRUE	TRUE	Nifedipine	L-type Ca2+ channel blocker; vasodilator	COC(=O)C1=C(C)NC(C)=C(C1C1=C(C=CC=C1)[N+]([O-])=O)C(=O)OC
L2300	796	0.598272	FALSE	TRUE	TRUE	SK1-I		C1(=C(C=CC(=C1)CCCCC)/C=C/[C@@H]([C@@H](CO)NC)O).Cl
14030	768	0.599154	FALSE	TRUE	TRUE	ERGOSTEROL		CC(C)C(C)\C=C\C(C)C1CCC2C3=CC=C4CC(O)CCC4(C)C3CCC12C
TM-L4	704	0.603211	FALSE	TRUE	TRUE	Ivosidenib	Ivosidenib is an orally available inhibitor of isocitrate dehydrogenase type 1 (IDH1), with potential antineoplastic activity. Ivosidenib specifically inhibits a mutated form of IDH1 in the cytoplasm, which inhibits the formation of the oncometabolite, 2-hydroxyglutarate (2 hG). This may lead to both an induction of cellular differentiation and an inhibition of cellular proliferation in IDH1-expr…	Fc1cncc(c1)N([C@H](C(=O)NC1CC(F)(F)C1)c1ccccc1Cl)C(=O)[C@@H]1CCC(=O)N1c1cc(ccn1)C#N
LOPAC	676	0.604916	FALSE	TRUE	TRUE	Cefsulodin sodium salt hydrate	Third generation cephalosporin antibiotic; interferes with cell wall synthesis	[Na+].NC(=O)C1=CC=[N+](CC2=C(N3[C@H](SC2)[C@H](NC(=O)[C@@H](C2=CC=CC=C2)S([O-])(=O)=O)C3=O)C([O-])=O)C=C1
14030	663	0.60576	FALSE	TRUE	TRUE	PROPANTHELINE BROMIDE	anticholinergic	[Br-].CC(C)[N+](C)(CCOC(=O)C1C2=C(OC3=C1C=CC=C3)C=CC=C2)C(C)C
14030	732	0.606115	FALSE	TRUE	TRUE	SHAM CONTROL	SHAM CONTROL	SHAM CONTROL
TM-L4	691	0.607976	FALSE	TRUE	TRUE	Encorafenib	LGX818 is an orally available mutated BRaf V600E inhibitor(IC50=0.3 nM) with potential antineoplastic activity.	C[C@@H](CNC1=NC=CC(=N1)C2=CN(N=C2C3=CC(=CC(=C3F)NS(=O)(=O)C)Cl)C(C)C)NC(=O)OC
LOPAC	841	0.608082	FALSE	TRUE	TRUE	(-)-trans-(1S,2S)-U-50488 hydrochloride	Potent kappa opioid receptor agonist; more potent enantiomer of (±)-trans-U-50488	Cl.CN([C@H]1CCCC[C@@H]1N1CCCC1)C(=O)CC1=CC=C(Cl)C(Cl)=C1
14030	786	0.608981	FALSE	TRUE	TRUE	CISPLATIN	antineoplastic, convulsant	N.N.Cl[Pt]Cl
TM-L4	658	0.609618	FALSE	TRUE	TRUE	Tropicamide	Tropicamide is a synthetic muscarinic antagonist with actions similar to atropine and with an anticholinergic property. Upon ocular administration, tropicamide binds to and blocks the muscarinic receptors in the sphincter and ciliary muscle in the eye. This inhibits the responses from cholinergic stimulation, producing dilation of the pupil and paralysis of the ciliary muscle. Tropicamide is a di…	C(c1ccccc1)(C(=O)N(Cc1ccncc1)CC)CO
14030	536	0.609731	FALSE	TRUE	TRUE	PHENYL AMINOSALICYLATE	antibacterial (tuberculostatic)	NC1=CC(O)=C(C=C1)C(=O)OC1=CC=CC=C1
14030	764	0.610175	FALSE	TRUE	TRUE	IPRIFLAVONE	anabolic	CC(C)OC1=CC=C2C(=O)C=C(OC2=C1)C1=CC=CC=C1
14030	885	0.612018	FALSE	TRUE	TRUE	NORETHINDRONE	progestogen	C[C@]12CCC3C(CCC4=CC(=O)CC[C@H]34)C1CC[C@@]2(O)C#C
L1900	792	0.612179	FALSE	TRUE	TRUE	Tubastatin A	Tubastatin A is a potent and selective HDAC6 inhibitor with IC50 of 15 nM. It is selective against all the other isozymes (1000-fold) except HDAC8 (57-fold).	C1=C(C=CC(=C1)CN2C3=C(C4=C2C=CC=C4)CN(CC3)C)C(NO)=O
L1900	748	0.613288	FALSE	TRUE	TRUE	SHAM CONTROL	SHAM CONTROL	SHAM CONTROL
14030	736	0.614986	FALSE	TRUE	TRUE	DICLOFENAC SODIUM	antiinflammatory	[Na+].[O-]C(=O)CC1=C(NC2=C(Cl)C=CC=C2Cl)C=CC=C1
14030	730	0.615763	FALSE	TRUE	TRUE	CEPHALOTHIN SODIUM	antibacterial	[Na+].CC(=O)OCC1=C(N2[C@H](SC1)[C@H](NC(=O)CC1=CC=CS1)C2=O)C([O-])=O
TM-L4	767	0.615914	FALSE	TRUE	TRUE	Esomeprazole Sodium	Esomeprazole Sodium is the S-isomer of omeprazole with selective and irreversible proton pump inhibitor activity.	[Na+].COc1ccc2nc([n-]c2c1)[S@@](=O)Cc1ncc(C)c(OC)c1C
L1900	706	0.616365	FALSE	TRUE	TRUE	SHAM CONTROL	SHAM CONTROL	SHAM CONTROL
14030	663	0.617002	FALSE	TRUE	TRUE	TESTOSTERONE PROPIONATE	androgen, antineoplastic	CCC(=O)O[C@H]1CCC2C3CCC4=CC(=O)CC[C@]4(C)C3CC[C@]12C
14030	784	0.618175	FALSE	TRUE	TRUE	HEPTAMINOL HYDROCHLORIDE	vasodilator	Cl.CC(N)CCCC(C)(C)O
14030	779	0.619185	FALSE	TRUE	TRUE	TOPIRAMATE	anticonvulsant, antimigraine, GABA-A agonist, AMP/kinate glutamate receptor antagonist, carbonic anhydrase inhibitor	CC1(C)O[C@@H]2CO[C@@]3(COS(N)(=O)=O)OC(C)(C)O[C@H]3[C@@H]2O1
14030	791	0.621351	FALSE	TRUE	TRUE	beta-NAPHTHOL	anthelmintic, antiseptic	OC1=CC2=CC=CC=C2C=C1
14030	704	0.62142	FALSE	TRUE	TRUE	CHLOROCRESOL	antiinfectant	CC1=CC(O)=CC=C1Cl
14030	824	0.621621	FALSE	TRUE	TRUE	PHENYTOIN SODIUM	anticonvulsant, antieleptic	[Na+].O=C1NC(C(=O)[N-]1)(C1=CC=CC=C1)C1=CC=CC=C1
LOPAC	761	0.621998	FALSE	TRUE	TRUE	A-315456	Selective alpha 1D-adrenoceptor antagonist	CCS(=O)(=O)NC1=CC(=CC=C1)C(C1=CN=CN1)=C1CCCCC1
L1900	772	0.622156	FALSE	TRUE	TRUE	XL019	XL019 is a potent and selective JAK2 inhibitor with IC50 of 2.2 nM, exhibiting >50-fold selectivity over JAK1, JAK3 and TYK2. Phase 1.	C1=CC(=CC=C1NC([C@@H]2CCCN2)=O)C3=CC=NC(=N3)NC4=CC=C(C=C4)N5CCOCC5
14030	746	0.622537	FALSE	TRUE	TRUE	SPARTEINE SULFATE	oxytocic	OS(O)(=O)=O.C1CCN2C[C@H]3C[C@@H](CN4CCCC[C@H]34)[C@@H]2C1
LOPAC	817	0.622764	FALSE	TRUE	TRUE	(±)-7-Hydroxy-DPAT hydrobromide	Selective D3 dopamine receptor agonist	Br.CCCN(CCC)C1CCC2=C(C1)C=C(O)C=C2
TM-L4	794	0.623247	FALSE	TRUE	TRUE	Vemurafenib	Vemurafenib (PLX4032) is a novel and potent B-Raf (V600E) inhibitor (IC50: 31 nM).	CCCS(=O)(=O)Nc1ccc(F)c(C(=O)c2c[nH]c3ncc(cc23)-c2ccc(Cl)cc2)c1F
TM-L4	703	0.623853	FALSE	TRUE	TRUE	Cefotiam Hexetil Hydrochloride	Cefotiam Hydrochloride is the hydrochloride salt form of cefotiam, a third-generation, semi-synthetic, beta-lactam cephalosporin antibiotic with antibacterial activity. Cefotiam binds to penicillin-binding proteins (PBPs), transpeptidases that are responsible for crosslinking of peptidoglycan. By preventing crosslinking of peptidoglycan, cell wall integrity is lost and cell wall synthesis is halt…	Cl.Cl.CC(OC(=O)OC1CCCCC1)OC(=O)C1=C(CSc2nnnn2CCN(C)C)CS[C@@H]2[C@H](NC(=O)Cc3csc(N)n3)C(=O)N12
TM-L4	736	0.624167	FALSE	TRUE	TRUE	Nifedipine	Nifedipine is a dihydropyridine calcium channel blocking agent. Nifedipine inhibits the transmembrane influx of extracellular calcium ions into myocardial and vascular smooth muscle cells, causing dilatation of the main coronary and systemic arteries and decreasing myocardial contractility. This agent also inhibits the drug efflux pump P-glycoprotein which is overexpressed in some multi-drug resi…	COC(=O)C1=C(C)NC(=C(C1c1ccccc1[N+](=O)[O-])C(=O)OC)C
14030	773	0.624424	FALSE	TRUE	TRUE	CAFFEIC ACID	antineoplastic, PGE2 synthase inhibitor, PK inhibitor	OC(=O)\C=C\C1=CC(O)=C(O)C=C1
14030	839	0.624627	FALSE	TRUE	TRUE	ARIPIPRAZOLE	antipsychotic, 5HT2A antagonist	ClC1=CC=CC(N2CCN(CCCCOC3=CC=C4CCC(=O)NC4=C3)CC2)=C1Cl
14030	709	0.625451	FALSE	TRUE	TRUE	STROPHANTHIDIN	cardiotonic	C[C@]12CCC3C(CC[C@]4(O)C[C@@H](O)CC[C@]34C=O)[C@@]1(O)CCC2C1=CC(=O)OC1
14030	767	0.626078	FALSE	TRUE	TRUE	BENZO[a]PYRENE	carcinogen, binds to DNA	C1=CC2=CC3=CC=C4C=CC=C5C=CC(=C2C=C1)C3=C45
14030	757	0.626083	FALSE	TRUE	TRUE	EDITOL	alkylising agent	CC(O)CN(CCN(CC(C)O)CC(C)O)CC(C)O
TM-L4	732	0.626627	FALSE	TRUE	TRUE	Azilsartan	Azilsartan is an Angiotensin 2 Receptor Blocker. The mechanism of action of azilsartan is as an Angiotensin 2 Type 1 Receptor Antagonist. The physiologic effect of azilsartan is by means of Decreased Blood Pressure.	CCOc1nc2cccc(C(O)=O)c2n1Cc1ccc(cc1)-c1ccccc1-c1noc(=O)[nH]1
TM-L4	654	0.62689	FALSE	TRUE	TRUE	Sapropterin Hydrochloride	Sapropterin dihydrochloride is phenylalanine hydroxylase agonist that is approved for the treatment of BH4 responsive PKU.	Cl.Cl.[H][C@@]1(CNc2nc(N)[nH]c(=O)c2N1)[C@@H](O)[C@H](C)O
TM-L4	669	0.627493	FALSE	TRUE	TRUE	Ertugliflozin	PF-04971729 (Ertugliflozin) is a potent and selective inhibitor of the sodium-dependent glucose cotransporter 2 (SGLT2).	CCOc1ccc(Cc2cc(ccc2Cl)[C@]23OC[C@](CO)(O2)[C@@H](O)[C@H](O)[C@H]3O)cc1
L1200	745	0.627591	FALSE	TRUE	TRUE	Dabrafenib (GSK2118436)	Dabrafenib (GSK2118436) is a mutant BRAFV600 specific inhibitor with IC50 of 0.8 nM, with 4- and 6-fold less potency against B-Raf(wt) and c-Raf, respectively. Phase 3.	C1(C(=CC=CC=1F)F)S(=O)(=O)NC2C(=C(C=CC=2)C3N=C(SC=3C4=NC(=NC=C4)N)C(C)(C)C)F
14030	765	0.630407	FALSE	TRUE	TRUE	NITRENDIPINE	antihypertensive	CCOC(=O)C1=C(C)NC(C)=C(C1C1=CC(=CC=C1)[N+]([O-])=O)C(=O)OC
TM-L4	715	0.630584	FALSE	TRUE	TRUE	Umeclidinium bromide	Umeclidinium bromide is a novel mAChR antagonist.	[Br-].OC(c1ccccc1)(c1ccccc1)C12CC[N+](CCOCc3ccccc3)(CC1)CC2
TM-L4	754	0.630717	FALSE	TRUE	TRUE	Streptozocin	Streptozotocin is an antibiotic that is produced by Stretomyces achromogenes. It is used as an antineoplastic agent and to induce diabetes in experimental animals.	CN(N=O)C(=O)N[C@H]1[C@@H](O)O[C@H](CO)[C@@H](O)[C@@H]1O
14030	772	0.631051	FALSE	TRUE	TRUE	HARMANE	intercalating agent, sedative	CC1=NC=CC2=C1NC1=C2C=CC=C1
LOPAC	790	0.631163	FALSE	TRUE	TRUE	Rhodblock 6	Rhodblock 6 is an inhibitor of the Rho Kinase pathway.	O=C(NC1=CC=C2NN=CC2=C1)C1CCC1
TM-L4	756	0.631354	FALSE	TRUE	TRUE	Sodium Desoxycholate	Sodium Desoxycholate can activate the G protein-coupled bile acid receptor TGR5 that stimulates brown adipose tissue (BAT) thermogenic activity.	[Na+].C[C@H](CCC([O-])=O)[C@H]1CC[C@H]2[C@@H]3CC[C@@H]4C[C@H](O)CC[C@]4(C)[C@H]3C[C@H](O)[C@]12C
TM-L4	841	0.631648	FALSE	TRUE	TRUE	Gefitinib	Gefitinib is an EGFR tyrosine kinase inhibitor and can inhibit Tyr1173, Tyr992, Tyr1173 and Tyr992 (IC50s: 37/37/26/57 nM).	COc1cc2ncnc(Nc3ccc(F)c(Cl)c3)c2cc1OCCCN1CCOCC1
L2300	772	0.632675	FALSE	TRUE	TRUE	PB 28 dihydrochloride		C12(=C(C(=CC=C1)OC)CCCC2CCCN3CCN(CC3)C4CCCCC4).Cl.Cl
LOPAC	786	0.633484	FALSE	TRUE	TRUE	(±)-PPHT hydrochloride	Potent D2 dopamine receptor agonist	Cl.CCCN(CCC1=CC=CC=C1)C1CCC2=C(C1)C=CC=C2O
TM-L4	705	0.633634	FALSE	TRUE	TRUE	Baloxavir marboxil	Baloxavir marboxil is a novel cap-dependent endonuclease inhibitor for the treatment of influenza A and B virus infections.	COC(=O)OCOc1c2C(=O)N3CCOCC3N(C3c4ccc(F)c(F)c4CSc4ccccc34)n2ccc1=O
14030	880	0.6358	FALSE	TRUE	TRUE	POLYMYXIN B SULFATE	antibacterial	OS(O)(=O)=O.CCC(C)CCCCC(=O)NC(CCN)C(=O)NC(C(C)O)C(=O)NC(CCN)C(=O)NC1CCNC(=O)C(NC(=O)C(CCN)NC(=O)C(CCN)NC(=O)C(CC(C)C)NC(=O)C(CC2=CC=CC=C2)NC(=O)C(CCN)NC1=O)C(C)O
TM-L4	679	0.636524	FALSE	TRUE	TRUE	Isopropamide Iodide	Isopropamide iodide is a long-acting anticholinergic drug. It is used in the treatment of peptic ulcers and other gastrointestinal disorders. It also acts as a muscarinic receptor antagonist which can be applied to the treatment of diseases affecting cognition including Alzheimer’s disease.	[I-].CC(C)[N+](C)(CCC(C(N)=O)(c1ccccc1)c1ccccc1)C(C)C
L1900	756	0.641265	FALSE	TRUE	TRUE	SHAM CONTROL	SHAM CONTROL	SHAM CONTROL
TM-L4	745	0.641773	FALSE	TRUE	TRUE	Selexipag	Selexipag(NS-304) is prostacyclin receptor agonist that causes vasodilation in pulmonary vasculature and is used in the therapy of pulmonary arterial hypertension (PAH).	CC(C)N(CCCCOCC(=O)NS(=O)(=O)C)c1cnc(c(n1)c1ccccc1)c1ccccc1
L2300	762	0.641816	FALSE	TRUE	TRUE	Cytarabine	Cytarabine (Cytosine arabinoside, AraC) is an antimetabolic agent and DNA synthesis inhibitor with IC50 of 16 nM in wild-type CCRF-CEM cells.	C1(N(C=CC(=N1)N)[C@@H]2O[C@@H]([C@H]([C@H]2O)O)CO)=O
TM-L4	807	0.643105	FALSE	TRUE	TRUE	Methyl salicylate	Methyl salicylate (oil of wintergreen or wintergreen oil) is an organic ester naturally produced by many species of plants, particularly wintergreens. For acute joint and muscular pain, methyl salicylate is used as a rubefacient and analgesic in deep heating liniments.	COC(=O)c1ccccc1O
14030	734	0.643335	FALSE	TRUE	TRUE	CINOXACIN	antibacterial	CCN1N=C(C(O)=O)C(=O)C2=CC3=C(OCO3)C=C12
14030	832	0.643544	FALSE	TRUE	TRUE	NEFIRACETAM	analgesic, antiinflammatory	CC1=CC=CC(C)=C1NC(=O)CN1CCCC1=O
LOPAC	806	0.644523	FALSE	TRUE	TRUE	(±)-Octoclothepin maleate	D2 Dopamine receptor antagonist; serotonin receptor antagonist	OC(=O)\C=C/C(O)=O.CN1CCN(CC1)C1CC2=C(SC3=C1C=C(Cl)C=C3)C=CC=C2
TM-L4	734	0.64511	FALSE	TRUE	TRUE	Chloroquine diphosphate	Chloroquine is an aminoquinoline antimalarial and also is widely used as an autophagy inhibitor. Chloroquine also is an inhibitor of toll-like receptors (TLRs).	OP(O)(O)=O.OP(O)(O)=O.CCN(CC)CCCC(C)Nc1ccnc2cc(Cl)ccc12
TM-L4	713	0.645413	FALSE	TRUE	TRUE	Propacetamol Hydrochloride	Propacetamol is a prodrug of paracetamol (acetaminophen) with improved water solubility. Propacetamol is an analgesic drug delivered by IV when the oral application of NSAID is not appropriate or contradicted.	Cl.CCN(CC)CC(=O)Oc1ccc(NC(C)=O)cc1
LOPAC	860	0.645732	FALSE	TRUE	TRUE	2-Chloroadenosine	Adenosine receptor agonist with selectivity for A1 over A2	NC1=NC(Cl)=NC2=C1N=CN2[C@@H]1O[C@H](CO)[C@H](O)C1O
14030	624	0.645907	FALSE	TRUE	TRUE	PIPERAZINE	anthelmintic	C1CNCCN1
14030	698	0.647507	FALSE	TRUE	TRUE	DACARBAZINE	antineoplastic	CN(C)\N=N\C1=C(N=CN1)C(N)=O
14030	756	0.648127	FALSE	TRUE	TRUE	ORNITHINE aKETOGLUTARATE	hepatotonic, immune stimulant	NCCCC(N)C(O)=O.NCCCC(N)C(O)=O.OC(=O)CCC(=O)C(O)=O
14030	826	0.649767	FALSE	TRUE	TRUE	OXYQUINOLINE HEMISULFATE	antiinfectant, complexing agent	OS(O)(=O)=O.OC1=CC=CC2=CC=CN=C12
L1200	763	0.649781	FALSE	TRUE	TRUE	R406 (free base)	R406 (free base) is a potent Syk inhibitor with IC50 of 41 nM, strongly inhibits Syk but not Lyn, 5-fold less potent to Flt3. Phase 2.	C1(=C(C=C(C=C1OC)NC2=NC(=C(C=N2)F)NC3=NC4=C(C=C3)OC(C(N4)=O)(C)C)OC)OC
14030	649	0.65049	FALSE	TRUE	TRUE	METHENAMINE	antibacterial (urinary)	C1N2CN3CN1CN(C2)C3
14030	838	0.650991	FALSE	TRUE	TRUE	OXACILLIN SODIUM	antibacterial	[Na+].CC1=C(C(=O)NC2[C@H]3SC(C)(C)[C@@H](N3C2=O)C([O-])=O)C(=NO1)C1=CC=CC=C1
LOPAC	663	0.652991	FALSE	TRUE	TRUE	1-Deoxynojirimycin hydrochloride	alpha-glucosidase I-II inhibitor	Cl.OCC1NCC(O)C(O)C1O
LOPAC	682	0.655154	FALSE	TRUE	TRUE	Sulfaphenazole	Antibacterial; inhibitor of cytochrome P4502C enzymes	NC1=CC=C(C=C1)S(=O)(=O)NC1=CC=NN1C1=CC=CC=C1
L2300	865	0.655721	FALSE	TRUE	TRUE	cx-4945 (Silmitasertib)	CX-4945 is a potent and selective inhibitor of CK2α and CK2α' with IC50 of 1 nM.	C1=NC=C2C(=C1)C(=NC3=C2C=CC(=C3)C(=O)O)NC4=CC(=CC=C4)Cl
LOPAC	734	0.657333	FALSE	TRUE	TRUE	TTNPB	Selective and highly potent retinoic acid analog with affinity for retinoic acid receptors (RAR) alpha, beta, and gamma	C\C(=C/C1=CC=C(C=C1)C(O)=O)C1=CC2=C(C=C1)C(C)(C)CCC2(C)C
LOPAC	707	0.662475	FALSE	TRUE	TRUE	Supercinnamaldehyde	Transient receptor potential ankyrin 1 (TRPA1) receptor activator; covalently modifies cysteines to acitvate channel.	CN1C(=O)\C(=C/C(C)=O)C2=CC=CC=C12
14030	854	0.665338	FALSE	TRUE	TRUE	PIROMIDIC ACID	antibacterial	NCCO.CCN1C=C(C(O)=O)C(=O)C2=C1N=C(N=C2)N1CCCC1
14030	730	0.665771	FALSE	TRUE	TRUE	SIMVASTATIN	antihyperlipidemic, HMGCoA reductase inhibitor	CCC(C)(C)C(=O)O[C@H]1C[C@@H](C)C=C2C=C[C@H](C)[C@H](CC[C@@H]3C[C@@H](O)CC(=O)O3)[C@@H]12
14030	934	0.666184	FALSE	TRUE	TRUE	NYLIDRIN HYDROCHLORIDE	vasodilator (peripheral)	Cl.CC(CCC1=CC=CC=C1)NC(C)C(O)C1=CC=C(O)C=C1
14030	806	0.666444	FALSE	TRUE	TRUE	VINCAMINE	vasodilator	CC[C@@]12CCCN3CCC4=C([C@H]13)N(C1=C4C=CC=C1)[C@@](O)(C2)C(=O)OC
14030	724	0.66897	FALSE	TRUE	TRUE	THIOGUANINE	antineoplastic, purine antimetabolite	NC1=NC2=C(NC=N2)C(=S)N1
14030	879	0.669427	FALSE	TRUE	TRUE	MECLIZINE HYDROCHLORIDE	antiemetic	Cl.Cl.CC1=CC(CN2CCN(CC2)C(C2=CC=CC=C2)C2=CC=C(Cl)C=C2)=CC=C1
14030	758	0.67063	FALSE	TRUE	TRUE	PILOCARPINE NITRATE	antiglaucoma agent, miotic	O[N+]([O-])=O.CC[C@H]1[C@@H](CC2=CN=CN2C)COC1=O
14030	627	0.672575	FALSE	TRUE	TRUE	BETAMETHASONE VALERATE	glucocorticoid	CCCCC(=O)O[C@@]1([C@@H](C)CC2C3CCC4=CC(=O)C=C[C@]4(C)[C@@]3(F)C(O)C[C@]12C)C(=O)CO
14030	841	0.67281	FALSE	TRUE	TRUE	HARMINE	antiparkinsonian, CNS stimulant	COC1=CC=C2C(NC3=C2C=CN=C3C)=C1
TM-L4	746	0.673802	FALSE	TRUE	TRUE	Chlorzoxazone	Chlorzoxazone is a Muscle Relaxant. The physiologic effect of chlorzoxazone is by means of Centrally-mediated Muscle Relaxation.	Clc1cc2c(oc(=O)[nH]2)cc1
14030	667	0.678744	FALSE	TRUE	TRUE	CHINIOFON	antiprotozoal, amebicide	[Na+].OC1=C2N=CC=CC2=C(C=C1I)S([O-])(=O)=O
14030	936	0.679074	FALSE	TRUE	TRUE	NAPROXEN(+)	antiinflammatory, analgesic, antipyretic	COC1=CC2=CC=C(C=C2C=C1)[C@H](C)C(O)=O
L1900	772	0.679295	FALSE	TRUE	TRUE	SHAM CONTROL	SHAM CONTROL	SHAM CONTROL
14030	792	0.681421	FALSE	TRUE	TRUE	VIDARABINE	antiviral	NC1=C2N=CN([C@@H]3O[C@H](CO)[C@@H](O)[C@@H]3O)C2=NC=N1
LOPAC	881	0.681444	FALSE	TRUE	TRUE	SB 202190	Highly selective, potent and cell permeable p38 MAP kinase inhibitor.	OC1=CC=C(C=C1)C1=NC(=C(N1)C1=CC=C(F)C=C1)C1=CC=NC=C1
LOPAC	738	0.681648	FALSE	TRUE	TRUE	Ibudilast	Phosphodiesterase IV (PDE IV) inhibitor	CC(C)C(=O)C1=C2C=CC=CN2N=C1C(C)C
14030	778	0.682224	FALSE	TRUE	TRUE	HYDRALAZINE	antihypertensive	NNC1=C2C=CC=CC2=CN=N1
L1900	748	0.682368	FALSE	TRUE	TRUE	ZM 447439	ZM 447439 is a selective and ATP-competitive inhibitor for Aurora A and Aurora B with IC50 of 110 nM and 130 nM, respectively. It is more than 8-fold selective for Aurora A/B than MEK1, Src, Lck and has little effect againstCDK1/2/4, Plk1, Chk1, etc.	O1CCN(CC1)CCCOC2=C(C=C3C(=C2)N=CN=C3NC4=CC=C(C=C4)NC(=O)C5=CC=CC=C5)OC
14030	891	0.684856	FALSE	TRUE	TRUE	PARGYLINE HYDROCHLORIDE	antihypertensive	Cl.CN(CC#C)CC1=CC=CC=C1
TM-L4	735	0.684929	FALSE	TRUE	TRUE	Pitolisant hydrochloride	Pitolisant hydrochloride is a potent and selective inverse agonist of the histamine H3 receptor(Ki : 0.16 nM).	Cl.Clc1ccc(CCCOCCCN2CCCCC2)cc1
L1900	703	0.684966	FALSE	TRUE	TRUE	SHAM CONTROL	SHAM CONTROL	SHAM CONTROL
14030	712	0.687287	FALSE	TRUE	TRUE	ETHACRYNIC ACID	diuretic	CCC(=C)C(=O)C1=C(Cl)C(Cl)=C(OCC(O)=O)C=C1
L1900	784	0.688461	FALSE	TRUE	TRUE	Sodium Phenylbutyrate	Sodium Phenylbutyrate is a transcriptional regulators that act by altering chromatin structure via the modulation of HDAC activity.	C(CCCC1C=CC=CC=1)(=O)O[Na]
LOPAC	757	0.688705	FALSE	TRUE	TRUE	Pindolol	Nonselective beta adrenoceptor antagonist; vasodilator	CC(C)NCC(O)COC1=CC=CC2=C1C=CN2
14030	991	0.689325	FALSE	TRUE	TRUE	EUCALYPTOL	anthelmintic, antiseptic, expectorant	C[C@@]12CC[C@@H](CC1)C(C)(C)O2
TM-L4	764	0.690802	FALSE	TRUE	TRUE	Oseltamivir acid	Oseltamivir acid (GS4071) is a potent influenza virus neuraminidase inhibitor and the prodrug of GS4071.	CCC(CC)O[C@@H]1C=C(C[C@H](N)[C@H]1NC(C)=O)C(O)=O
L1200	764	0.69089	FALSE	TRUE	TRUE	WYE-125132 (WYE-132)	WYE-125132 is a highly potent, ATP-competitive mTOR inhibitor with IC50 of 0.19 nM; highly selective for mTOR versus PI3Ks or PI3K-related kinases hSMG1 and ATR.	C1(=NC(=NC2=C1C=NN2C3CCC4(CC3)OCCO4)C5=CC=C(C=C5)NC(=O)NC)N6CC7CCC(O7)C6
TM-L4	788	0.6929	FALSE	TRUE	TRUE	Celecoxib	Celecoxib is a Nonsteroidal Anti-inflammatory Drug. The mechanism of action of celecoxib is as a Cyclooxygenase Inhibitor.	Cc1ccc(cc1)-c1cc(nn1-c1ccc(cc1)S(N)(=O)=O)C(F)(F)F
L1200	727	0.693202	FALSE	TRUE	TRUE	A-769662	A-769662 is a potent, reversible AMPK activator with EC50of 0.8 μM, little effect on GPPase/FBPase activity.	C1(=CC=C(C=C1)C2=CSC3=C2C(=C(C(N3)=O)C#N)O)C4=CC=CC=C4O
TM-L4	652	0.694304	FALSE	TRUE	TRUE	SHAM CONTROL	SHAM CONTROL	SHAM CONTROL
14030	773	0.699812	FALSE	TRUE	TRUE	PIPERACILLIN SODIUM	antibacterial	[Na+].CCN1CCN(C(=O)NC(C(=O)N[C@H]2[C@H]3SC(C)(C)[C@@H](N3C2=O)C([O-])=O)C2=CC=CC=C2)C(=O)C1=O
TM-L4	704	0.700587	FALSE	TRUE	TRUE	Cefalexine EP IMpurity B	Cefalexine EP IMpurity B is used as an antibiotic.	N12C(=O)[C@H]([C@H]1SCC(=C2C(=O)O)C)N
TM-L4	806	0.702711	FALSE	TRUE	TRUE	Isoprenaline hydrochloride	Isoproterenol is a potent beta-adrenergic agonist with the peripheral vasodilator, bronchodilator, and cardiac stimulating properties.	Cl.CC(C)NCC(O)c1ccc(O)c(O)c1
14030	771	0.703342	FALSE	TRUE	TRUE	DANTHRON	cathartic	OC1=CC=CC2=C1C(=O)C1=C(C=CC=C1O)C2=O
TM-L4	665	0.704361	FALSE	TRUE	TRUE	Methyl Aminolevulinate Hydrochloride	Methyl Aminolevulinate Hydrochloride is commonly used in photosentizer reagents for photodynamic therapy to treat conditions such as Acne vulgaris and hypertrophic scarring.	Cl.COC(=O)CCC(=O)CN
L2300	763	0.705585	FALSE	TRUE	TRUE	SHAM CONTROL	SHAM CONTROL	SHAM CONTROL
14030	716	0.706349	FALSE	TRUE	TRUE	ESTRADIOL	estrogen	C[C@]12CCC3C(CCC4=C3C=CC(O)=C4)C1CC[C@@H]2O
14030	897	0.706387	FALSE	TRUE	TRUE	ESTRIOL	estrogen	C[C@]12CCC3C(CCC4=C3C=CC(O)=C4)C1C[C@@H](O)[C@@H]2O
L2300	824	0.707508	FALSE	TRUE	TRUE	Temsirolimus (Torisel)	Temsirolimus (CCI-779, Torisel) is a specific mTOR inhibitor with IC50 of 1.76 μM.	[C@H]1(C[C@@H](CC[C@@H]1OC(C(CO)(CO)C)=O)C[C@H]([C@@H]2CC([C@@H](/C=C(/[C@H]([C@@H](OC)C([C@@H](C[C@@H](/C=C/C=C/C=C(/[C@H](C[C@]3(CC[C@H]([C@](C(C(N4[C@](C(O2)=O)(CCCC4)[H])=O)=O)(O3)O)C)[H])OC)C)C)C)=O)O)C)C)=O)C)OC
14030	705	0.708618	FALSE	TRUE	TRUE	AMINOCAPROIC ACID HYDROCHLORIDE	hemostatic	Cl.NCCCCCC(O)=O
14030	927	0.709085	FALSE	TRUE	TRUE	CLIDINIUM BROMIDE	anticholinergic	[Br-].C[N+]12CCC(CC1)C(C2)OC(=O)C(O)(C1=CC=CC=C1)C1=CC=CC=C1
14030	846	0.709314	FALSE	TRUE	TRUE	BEPRIDIL HYDROCHLORIDE	antiarrhythmic	Cl.CC(C)COCC(CN(CC1=CC=CC=C1)C1=CC=CC=C1)N1CCCC1
14030	709	0.709384	FALSE	TRUE	TRUE	CARBENICILLIN DISODIUM	antibacterial	[Na+].[Na+].CC1(C)S[C@@H]2[C@H](NC(=O)C(C([O-])=O)C3=CC=CC=C3)C(=O)N2[C@H]1C([O-])=O
14030	850	0.70951	FALSE	TRUE	TRUE	DEMECLOCYCLINE HYDROCHLORIDE	antibacterial	Cl.CN(C)[C@H]1[C@@H]2C[C@@H]3[C@H](O)C4=C(C(O)=CC=C4Cl)C(=O)C3=C(O)[C@]2(O)C(=O)C(C(N)=O)=C1O
LOPAC	784	0.709793	FALSE	TRUE	TRUE	BLI-489 hydrate	BLI-489 is a penem §-lactamase inhibitor, which has shown activity against class A, C, and D §-lactamases	O.[Na+].[O-]C(=O)C1=CS[C@H]2N1C(=O)\C2=C\C1=CN=C2COCCN12
14030	898	0.710294	FALSE	TRUE	TRUE	AMINOSALICYLATE SODIUM	antibacterial, tuberculostatic	[Na+].NC1=CC(O)=C(C=C1)C([O-])=O
14030	935	0.712861	FALSE	TRUE	TRUE	CLONIDINE HYDROCHLORIDE	antihypertensive	Cl.ClC1=CC=CC(Cl)=C1N=C1NCCN1
14030	710	0.713555	FALSE	TRUE	TRUE	ISOSORBIDE DINITRATE	antianginal	[O-][N+](=O)O[C@@H]1CO[C@@H]2[C@H](CO[C@H]12)O[N+]([O-])=O
LOPAC	694	0.714525	FALSE	TRUE	TRUE	Dihydroouabain	Sodium-potassium pump inhibitor	C[C@@H]1O[C@@H](O[C@H]2C[C@@H](O)[C@]3(CO)[C@H]4[C@H](O)C[C@]5(C)[C@H](CC[C@]5(O)C4CC[C@]3(O)C2)C2COC(=O)C2)[C@H](O)[C@H](O)[C@H]1O
14030	579	0.715697	FALSE	TRUE	TRUE	AZATHIOPRINE	immunosuppressant, antineoplastic, antirheumatic	CN1C=NC(=C1SC1=C2N=CN=C2N=CN1)[N+]([O-])=O
14030	645	0.715858	FALSE	TRUE	TRUE	ISOXSUPRINE HYDROCHLORIDE	vasodilator	Cl.CC(COC1=CC=CC=C1)NC(C)[C@H](O)C1=CC=C(O)C=C1
14030	935	0.716604	FALSE	TRUE	TRUE	GALLAMINE TRIETHIODIDE	muscle relaxant (skeletal)	[I-].[I-].[I-].CC[N+](CC)(CC)CCOC1=CC=CC(OCC[N+](CC)(CC)CC)=C1OCC[N+](CC)(CC)CC
14030	742	0.717313	FALSE	TRUE	TRUE	ASCORBIC ACID	antiscorbutic, antiviral	OCC(O)[C@H]1OC(=O)C(O)=C1O
LOPAC	793	0.718807	FALSE	TRUE	TRUE	(-)-Cotinine	Major metabolite of nicotine in humans	CN1[C@@H](CCC1=O)C1=CC=CN=C1
14030	965	0.718899	FALSE	TRUE	TRUE	METOCLOPRAMIDE HYDROCHLORIDE	antiemetic	Cl.CCN(CC)CCNC(=O)C1=C(OC)C=C(N)C(Cl)=C1
14030	620	0.719108	FALSE	TRUE	TRUE	AMINOSALICYLATE SODIUM	antibacterial, tuberculostatic	[Na+].NC1=CC(O)=C(C=C1)C([O-])=O
TM-L4	830	0.719868	FALSE	TRUE	TRUE	Docetaxel	Docetaxel is a microtubule inhibitor that inhibits microtubule disassembly (IC50: 0.2 μM).	CC(=O)O[C@@]12CO[C@@H]1C[C@H](O)[C@]1(C)[C@@H]2[C@H](OC(=O)c2ccccc2)[C@]2(O)C[C@H](OC(=O)[C@H](O)[C@@H](NC(=O)OC(C)(C)C)c3ccccc3)C(C)=C([C@@H](O)C1=O)C2(C)C
TM-L4	679	0.721005	FALSE	TRUE	TRUE	Exemestane	Exemestane is an Aromatase Inhibitor. The mechanism of action of exemestane is as an Aromatase Inhibitor.	[C@@H]12[C@@H]([C@@]3(C(=CC(=O)C=C3)C(=C)C2)C)CC[C@]2([C@H]1CCC2=O)C
LOPAC	796	0.721022	FALSE	TRUE	TRUE	Pargyline hydrochloride	MAO inhibitor, relatively selective for MAO-B	Cl.CN(CC#C)CC1=CC=CC=C1
14030	751	0.721988	FALSE	TRUE	TRUE	MEBENDAZOLE	anthelmintic	COC(=O)NC1=NC2=C(N1)C=CC(=C2)C(=O)C1=CC=CC=C1
14030	734	0.722131	FALSE	TRUE	TRUE	PHENACETIN	analgesic, antipyretic	CCOC1=CC=C(NC(C)=O)C=C1
14030	804	0.722361	FALSE	TRUE	TRUE	AMYLENE HYDRATE	hypnotic, antidiabetic	CCC(C)(C)O
L1200	1014	0.722497	FALSE	TRUE	TRUE	Flavopiridol HCl	Flavopiridol competes with ATP to inhibit CDKs including CDK1, CDK2, CDK4 and CDK6 with IC50 of ~ 40 nM. It is 7.5-fold more selective for CDK1/2/4/6 than CDK7. Flavopiridol is initially found to inhibit EGFR and PKA. Phase 1/2.	C1(=C(C(=C2C(=C1O)C(C=C(O2)C3=C(C=CC=C3)Cl)=O)[C@@]4([C@@H](CN(CC4)C)O)[H])O).Cl
14030	617	0.722815	FALSE	TRUE	TRUE	ASPIRIN	analgesic, antipyretic, antiinflammatory	CC(=O)OC1=C(C=CC=C1)C(O)=O
14030	734	0.722815	FALSE	TRUE	TRUE	TOCAINIDE HYDROCHLORIDE	anti-arrhythmic	Cl.CC(N)C(=O)NC1=C(C)C=CC=C1C
TM-L4	638	0.722996	FALSE	TRUE	TRUE	Tizanidine hydrochloride	Tizanidine hydrochloride, an α2-adrenergic receptor agonist, inhibits neurotransmitter release from CNS noradrenergic neurons.	Cl.Clc1c(NC2=NCCN2)c2nsnc2cc1
14030	657	0.723746	FALSE	TRUE	TRUE	CHLOROTHALONIL	antifungal, pesticide, acaricide	ClC1=C(Cl)C(C#N)=C(Cl)C(C#N)=C1Cl
14030	714	0.725141	FALSE	TRUE	TRUE	CHLORAMBUCIL	antineoplastic, alkylating agent	OC(=O)CCCC1=CC=C(C=C1)N(CCCl)CCCl
L2300	780	0.725274	FALSE	TRUE	TRUE	Coenzyme Q10(CoQ10)	Coenzyme Q10 (ubiquinone, ubidecarenone, coenzyme Q) is a component of the electron transport chain and participates in aerobic cellular respiration.	C1(=C(C(C(=C(C1=O)C/C=C(/CC/C=C(/CC/C=C(/CC/C=C(/CC/C=C(/CC/C=C(/CC/C=C(/CC/C=C(/CC/C=C(/CCC=C(C)C)C)C)C)C)C)C)C)C)C)C)=O)OC)OC
14030	724	0.725399	FALSE	TRUE	TRUE	CLOTRIMAZOLE	antifungal	ClC1=C(C=CC=C1)C(N1C=CN=C1)(C1=CC=CC=C1)C1=CC=CC=C1
L1900	798	0.725453	FALSE	TRUE	TRUE	CCT137690	CCT137690 is a highly selective inhibitor of Aurora A, Aurora B and Aurora C with IC50 of 15 nM, 25 nM and 19 nM. It has little effect on hERG ion-channel.	C1(=CN=C2C(=C1N3CCN(CC3)CC4C=C(ON=4)C)N=C(N2)C5=CC=C(C=C5)N6CCN(CC6)C)Br
14030	758	0.726937	FALSE	TRUE	TRUE	ANISODAMINE HYDROBROMIDE	anticholinergic, antispasmodic	CN1C2C[C@H](O)[C@H]1C[C@H](C2)OC(=O)[C@H](CO)C1=CC=CC=C1
L2300	695	0.727046	FALSE	TRUE	TRUE	XAV-939	XAV-939 is a selective Wnt β-catenin-mediated transcription inhibitor for TNKS1 and TNKS2 with IC50 of 11 nM and 4 nM, respectively.	C1=CC(=CC=C1C(F)(F)F)C2=NC(=C3C(=N2)CCSC3)O
LOPAC	761	0.727821	FALSE	TRUE	TRUE	Triflusal	Triflusal is an anti-inflammatory antithrombotic platelet aggregation inhibitor with a 3-fold mechanism of action	CC(=O)OC1=C(C=CC(=C1)C(F)(F)F)C(O)=O
L1900	789	0.729267	FALSE	TRUE	TRUE	SGC-CBP30	SGC-CBP30 is a potent CREBBP/EP300 inhibitor with IC50 of 21 nM and 38 nM, respectively.	C1=C(C=C2C(=C1)N(C(=N2)CCC3=CC(=C(C=C3)OC)Cl)C[C@H](C)N4CCOCC4)C5C(=NOC=5C)C
14030	745	0.729992	FALSE	TRUE	TRUE	MESTRANOL	estrogen, with progesterone as oral contraceptive	COC1=CC2=C(C=C1)C1CC[C@@]3(C)C(CC[C@@]3(O)C#C)C1CC2
TM-L4	722	0.730449	FALSE	TRUE	TRUE	Fludarabine	Fludarabine is a nucleic acid synthesis Inhibitor and a STAT1 activation inhibitor.	Nc1nc(F)nc2n(cnc12)[C@@H]1O[C@H](CO)[C@@H](O)[C@@H]1O
14030	714	0.73236	FALSE	TRUE	TRUE	DEHYDROCHOLIC ACID	choleretic	CC(CCC(O)=O)[C@H]1CCC2C3C(CC(=O)[C@]12C)[C@@]1(C)CCC(=O)C[C@H]1CC3=O
L2300	753	0.732523	FALSE	TRUE	TRUE	SHAM CONTROL	SHAM CONTROL	SHAM CONTROL
14030	746	0.733221	FALSE	TRUE	TRUE	ACEDOBEN	immune stimulant (component)	CC(=O)NC1=CC=C(C=C1)C(O)=O
LOPAC	781	0.734035	FALSE	TRUE	TRUE	Prilocaine hydrochloride	Na+ channel blocker	Cl.CCCNC(C)C(=O)NC1=C(C)C=CC=C1
LOPAC	732	0.734256	FALSE	TRUE	TRUE	Clonidine hydrochloride	alpha2 Adrenoceptor agonist; antihypertensive	Cl.ClC1=CC=CC(Cl)=C1N=C1NCCN1
14030	784	0.734718	FALSE	TRUE	TRUE	TRIENTINE HYDROCHLORIDE	chelating agent	Cl.Cl.NCCNCCNCCN
LOPAC	701	0.735137	FALSE	TRUE	TRUE	CB 1954	Prodrug activated by NAD(P)H quinone oxidoreductase-2	NC(=O)C1=CC(N2CC2)=C(C=C1[N+]([O-])=O)[N+]([O-])=O
14030	706	0.735739	FALSE	TRUE	TRUE	MEQUINOL	skin depigmentor	COC1=CC=C(O)C=C1
14030	918	0.736244	FALSE	TRUE	TRUE	CHLOROCRESOL	antiinfectant	CC1=CC(O)=CC=C1Cl
L1900	738	0.736789	FALSE	TRUE	TRUE	Rucaparib (AG-014699,PF-01367338)	Rucaparib (AG-014699, PF-01367338) is an inhibitor of PARP with Ki of 1.4 nM for PARP1, also showing binding affinity to eight other PARP domains. Phase 1/2.	C1(C2C=CC(=CC=2)CNC)(=C3C4=C(N1)C=C(C=C4C(NCC3)=O)F).P(=O)(O)(O)O
14030	760	0.739136	FALSE	TRUE	TRUE	SCLAREOL	antineoplastic, apoptosis inducer	C[C@@](O)(CC[C@H]1[C@@](C)(O)CC[C@H]2C(C)(C)CCC[C@]12C)C=C
LOPAC	694	0.740282	FALSE	TRUE	TRUE	(±)-AMPA hydrobromide	Potent excitatory amino acid that interacts selectively with central AMPA/kainate glutamate receptors	Br.CC1=C(CC(N)C(O)=O)C(O)=NO1
14030	741	0.741024	FALSE	TRUE	TRUE	ATENOLOL	beta adrenergic blocker	CC(C)NCC(O)COC1=CC=C(CC(N)=O)C=C1
L2300	767	0.741751	FALSE	TRUE	TRUE	Telatinib (BAY 57-9352)	Telatinib (BAY 57-9352) is a potent inhibitor of VEGFR2/3, c-Kit and PDGFRβ with IC50 of 6 nM/4 nM, 1 nM and 15 nM, respectively.	N1=C(C2=C(C(=N1)OCC3=CC(=NC=C3)C(=O)NC)OC=C2)NC4=CC=C(C=C4)Cl
14030	765	0.743863	FALSE	TRUE	TRUE	TRIMETAZIDINE DIHYDROCHLORIDE	anti-anginal	Cl.Cl.COC1=C(OC)C(OC)=C(CN2CCNCC2)C=C1
14030	853	0.745255	FALSE	TRUE	TRUE	ISOBUTYLMETHYLXANTHINE	phosphodiesterase inhibitor	CC(C)CN1C2=C(NC=N2)C(=O)N(C)C1=O
14030	752	0.745583	FALSE	TRUE	TRUE	FENOFIBRATE	antihyperlipidemic	CC(C)OC(=O)C(C)(C)OC1=CC=C(C=C1)C(=O)C1=CC=C(Cl)C=C1
L2300	757	0.74663	FALSE	TRUE	TRUE	AZD7762	AZD7762 is a novel CHK1 and CHK2 inhibitor with IC50 of 5 nM and <10 nM, respectively.	C1(=CC=CC(=C1)C2SC(=C(C=2)NC(N)=O)C(N[C@@H]3CNCCC3)=O)F
14030	926	0.746796	FALSE	TRUE	TRUE	HYDROCORTISONE PHOSPHATE TRIETHYLAMINE	glucocorticoid	CC[NH+](CC)CC.CC[NH+](CC)CC.CC12C[C@H](O)C3C(CCC4=CC(=O)CCC34C)C1CC[C@]2(O)C(=O)COP([O-])([O-])=O
L1900	730	0.74772	FALSE	TRUE	TRUE	SHAM CONTROL	SHAM CONTROL	SHAM CONTROL
LOPAC	773	0.748494	FALSE	TRUE	TRUE	Diltiazem hydrochloride	Ca2+ channel antagonist selective for slow, or L-type, channels; stimulates 1,4-dihydropyridine binding to Ca2+ channels; coronary vasodilator	Cl.COC1=CC=C(C=C1)[C@@H]1SC2=C(C=CC=C2)N(CCN(C)C)C(=O)[C@@H]1OC(C)=O
L2300	802	0.749511	FALSE	TRUE	TRUE	SA4503		C1(C(=CC=C(C=1)CCN2CCN(CC2)CCCC3=CC=CC=C3)OC)OC.Cl.Cl
L2300	689	0.750237	FALSE	TRUE	TRUE	Trichostatin A (TSA)	Trichostatin A (TSA) is an HDAC inhibitor with IC50 of ~1.8 nM.	C1=C(C=CC(=C1)C([C@@H](/C=C(/C=C/C(NO)=O)C)C)=O)N(C)C
LOPAC	796	0.750512	FALSE	TRUE	TRUE	Gisadenafil besylate salt	.Gisadenafil (UK 369003) is a PDE5 inhibitor. It is 80 fold selective over PDE6, and greater than 3000 fold selective over PDEs 1-4 and 7	OS(=O)(=O)C1=CC=CC=C1.CCOC1=NC=C(C=C1C1=NC(=O)C2=NN(CCOC)C(CC)=C2N1)S(=O)(=O)N1CCN(CC)CC1
L2300	732	0.750668	FALSE	TRUE	TRUE	A-769662	A-769662 is a potent, reversible AMPK activator with EC50 of 0.8 μM and inhibits fatty acid synthesis with IC50 of 3.2 μM.	C1(=CC=C(C=C1)C2=CSC3=C2C(=C(C(N3)=O)C#N)O)C4=CC=CC=C4O
14030	709	0.750777	FALSE	TRUE	TRUE	POTASSIUM p-AMINOBENZOATE	ultraviolet screen	[K+].NC1=CC=C(C=C1)C([O-])=O
L2300	728	0.752693	FALSE	TRUE	TRUE	BEZ235 (NVP-BEZ235)	BEZ235 (NVP-BEZ235) is a dual ATP-competitive PI3K and mTOR inhibitor of p110α, p110γ, p110δ and p110β with IC50 of 4 nM, 5 nM, 7 nM and 75 nM, respectively.	C12=CN=C3C(=C1N(C(N2C)=O)C4=CC=C(C=C4)C(C#N)(C)C)C=C(C=C3)C5=CC6=C(N=C5)C=CC=C6
14030	763	0.752811	FALSE	TRUE	TRUE	CRESOPIRINE	antiinflammatory, antpyretic	CC(=O)OC1=C(C)C=CC=C1C(O)=O
L1200	803	0.753631	FALSE	TRUE	TRUE	SMI-4a	SMI-4a is a potent inhibitor of Pim1 with IC50 of 17 nM, modest potent to Pim-2, does not significantly inhibit other serine/threonine- or tyrosine-kinases.	S1C(NC(C/1=C\C2C=C(C=CC=2)C(F)(F)F)=O)=O
14030	674	0.754062	FALSE	TRUE	TRUE	MEPENZOLATE BROMIDE	anticholinergic	[Br-].C[N+]1(C)CCCC(C1)OC(=O)C(O)(C1=CC=CC=C1)C1=CC=CC=C1
14030	955	0.754874	FALSE	TRUE	TRUE	COLISTIMETHATE SODIUM	antibacterial	[Na+].[Na+].[Na+].[Na+].[Na+].CCC(C)C1NC(=O)C(NC(=O)C(CCNCS([O-])(=O)=O)NC(=O)C(CCNC(=O)C(NC(=O)C(CCNCS([O-])(=O)=O)NC(=O)C(CCNCS([O-])(=O)=O)NC1=O)C(C)O)NC(=O)C(CCNCS([O-])(=O)=O)NC(=O)C(NC(=O)C(CCNCS([O-])(=O)=O)NC(=O)CCCCC(C)C)C(C)O)C(C)CC
L2300	772	0.755437	FALSE	TRUE	TRUE	PIK-93	PIK-93 is a novel and potent inhibitor of PI3Kγ and PI4KIIIβ with IC50 of 16 nM and 19 nM, respectively.	C1(=C(C=C(C=C1)C2SC(=NC=2C)NC(C)=O)S(=O)(=O)NCCO)Cl
TM-L4	700	0.755485	FALSE	TRUE	TRUE	SHAM CONTROL	SHAM CONTROL	SHAM CONTROL
L1200	765	0.755694	FALSE	TRUE	TRUE	KRN 633	KRN 633 is an ATP-competitive inhibitor of VEGFR1/2/3 with IC50 of 170 nM/160 nM/125 nM, weakly inhibits PDGFR-α/β and c-Kit, does not block the phosphorylation of FGFR-1, EGFR or c-Met in cell.	C1(=C(C=C2C(=C1)C(=NC=N2)OC3=CC=C(C(=C3)Cl)NC(=O)NCCC)OC)OC
TM-L4	605	0.757996	FALSE	TRUE	TRUE	Duloxetine hydrochloride	Duloxetine hydrochloride is a thiophene derivative and selective neurotransmitter uptake inhibitor for SEROTONIN and NORADRENALINE (SNRI). It is an ANTIDEPRESSIVE AGENT and ANXIOLYTIC and is also used for the treatment of pain in patients with DIABETES MELLITUS and FIBROMYALGIA.	s1cccc1[C@@H](Oc1cccc2c1cccc2)CCNC.Cl
TM-L4	715	0.760628	FALSE	TRUE	TRUE	Palonosetron hydrochloride	Palonosetron is a 5-HT3 antagonist used in the prevention and treatment of chemotherapy-induced nausea and vomiting.	Cl.O=C1N(C[C@H]2CCCc3cccc1c23)[C@@H]1CN2CCC1CC2
14030	777	0.762862	FALSE	TRUE	TRUE	PYRITINOL	cognition enhancer, nootropic	CC1=NC=C(CSSCC2=CN=C(C)C(O)=C2CO)C(CO)=C1O
TM-L4	746	0.764619	FALSE	TRUE	TRUE	Balsalazide disodium salt dihydrate	Balsalazide is an anti-inflammatory compound used in the treatment of Inflammatory Bowel Disease.Balsalazide is a new 5-aminosalicylic acid (5-ASA) containing prodrug. High dose balsalazide (3.0 g twice daily) was superior in maintaining remission in patients with ulcerative colitis compared with a low dose (1.5 g twice daily) or a standard dose of mesalazine (0.5 g three times daily). All three …	[Na+].[Na+].O.O.O=C([O-])c1cc(ccc1O)/N=N/c2ccc(cc2)C(=O)NCCC([O-])=O
14030	726	0.765335	FALSE	TRUE	TRUE	TEICOPLANIN [A(2-1) shown]	antibacterial	CCCCC\C=C\CCC(=O)N[C@@H]1[C@@H](O)[C@H](O)[C@@H](CO)O[C@H]1OC1=C2OC3=CC=C(CC4NC(=O)[C@H](N)C5=CC=C(O)C(OC6=CC(O)=CC(=C6)[C@H](NC4=O)C(=O)N[C@@H]4C(C=C1OC1=CC=C(C=C1Cl)[C@@H](O[C@@H]1O[C@H](CO)[C@@H](O)[C@H](O)[C@H]1NC(C)=O)[C@@H]1NC(=O)[C@H](NC4=O)C4=CC=C(O)C(=C4)C4=C(C=C(O)C=C4OC4O[C@H](CO)[C@@H](O)[C@H](O)[C@@H]4O)[C@H](NC1=O)C(O)=O)=C2)=C5)C=C3Cl
L2300	778	0.765541	FALSE	TRUE	TRUE	DFMO		C(C(N)(CCCN)C(F)F)(=O)O.Cl
14030	674	0.765897	FALSE	TRUE	TRUE	CAFFEINE	CNS stimulant	CN1C=NC2=C1C(=O)N(C)C(=O)N2C
14030	706	0.76658	FALSE	TRUE	TRUE	ATOVAQUONE	antipneumocystic, antimalarial	OC1=C([C@H]2CC[C@@H](CC2)C2=CC=C(Cl)C=C2)C(=O)C2=C(C=CC=C2)C1=O
14030	815	0.76821	FALSE	TRUE	TRUE	LEFLUNOMIDE	antineoplastic, PDGF receptor blocker, immunomodulator	CC1=C(C=NO1)C(=O)NC1=CC=C(C=C1)C(F)(F)F
L2300	687	0.769084	FALSE	TRUE	TRUE	WZ4002	WZ4002 is a novel, mutant-selective EGFR inhibitor for EGFRL858R and EGFRL858R/T790M with IC50 of 2 nM and 8 nM, respectively.	C1(=CC(=C(C=C1)NC2=NC=C(C(=N2)OC3=CC(=CC=C3)NC(C=C)=O)Cl)OC)N4CCN(CC4)C
L2300	795	0.770027	FALSE	TRUE	TRUE	Tipifarnib (Zarnestra)	Tipifarnib (Zarnestra, R115777) is a potent and specific farnesyltransferase (FTase) inhibitor with IC50 of 0.6 nM.	C1=CC(=CC=C1[C@](C2=CN=CN2C)(C3=CC4=C(C=C3)N(C(C=C4C5=CC(=CC=C5)Cl)=O)C)N)Cl
L1200	778	0.770532	FALSE	TRUE	TRUE	NVP-BHG712	NVP-BHG712 is a specific EphB4 inhibitor with ED50 of 25 nM that discriminates between VEGFR and EphB4 inhibition; also shows activity against c-Raf, c-Src and c-Abl with IC50 of 0.395 μM, 1.266 μM and 1.667 μM, respectively.	C12=C(N=C(N=C1NC3=CC(=CC=C3C)C(NC4=CC=CC(=C4)C(F)(F)F)=O)C5=CC=CN=C5)N(N=C2)C
L2300	742	0.770941	FALSE	TRUE	TRUE	SHAM CONTROL	SHAM CONTROL	SHAM CONTROL
L1200	730	0.772183	FALSE	TRUE	TRUE	AMG-458	AMG 458 is a potent c-Met inhibitor with Ki of 1.2 nM, ~350-fold selectivity for c-Met than VEGFR2 in cells.	N1(N(C(C(=C1C)C(=O)NC2C=CC(=CN=2)OC3C=CN=C4C=C(C=CC=34)OC)=O)C5C=CC=CC=5)CC(C)(C)O
TM-L4	801	0.772564	FALSE	TRUE	TRUE	Naproxen	Naproxen is a propionic acid derivative and a non-steroidal anti-inflammatory drug (NSAID) with anti-inflammatory, antipyretic and analgesic activities.	c12c(cc(cc2)OC)ccc(c1)[C@@H](C(=O)O)C
14030	736	0.772712	FALSE	TRUE	TRUE	DAPSONE	antibacterial, leprostatic, dermatitis herpetiformis suppressant	NC1=CC=C(C=C1)S(=O)(=O)C1=CC=C(N)C=C1
14030	830	0.773234	FALSE	TRUE	TRUE	PROTIONAMIDE	antibacterial	CCCC1=NC=CC(=C1)C(N)=S
LOPAC	684	0.77334	FALSE	TRUE	TRUE	2-Hydroxysaclofen	GABA-B receptor antagonist	NCC(O)(CS(O)(=O)=O)C1=CC=C(Cl)C=C1
LOPAC	759	0.774321	FALSE	TRUE	TRUE	ARL 67156 trisodium salt	ecto-ATPase inhibitor; prevents metabolism of P2 receptor agonists	[Na+].[Na+].[Na+].CCN(CC)C1=NC=NC2=C1N=CN2[C@@H]1O[C@H](COP([O-])(=O)OP([O-])(=O)C(Br)(Br)P(O)([O-])=O)[C@@H](O)[C@H]1O
14030	750	0.774752	FALSE	TRUE	TRUE	PROPAFENONE HYDROCHLORIDE	antiarrhythmic	Cl.CCCNCC(O)COC1=CC=CC=C1C(=O)CCC1=CC=CC=C1
14030	770	0.774752	FALSE	TRUE	TRUE	TORSEMIDE	diuretic, inhibits Na/K/2Cl carrier system	CC(C)NC(=O)NS(=O)(=O)C1=C(NC2=CC=CC(C)=C2)C=CN=C1
LOPAC	790	0.776618	FALSE	TRUE	TRUE	6-Aminohexanoic acid	Promotes rapid dissociation of plasmin, thereby inhibiting the activation of plasminogen and subsequent fibrinolysis; inhibits plasminogen binding to activated platelets	NCCCCCC(O)=O
L2300	721	0.777633	FALSE	TRUE	TRUE	Ranolazine (Ranexa)	Ranolazine(Ranexa) is an antianginal medication.	C1=CC=C(C(=C1C)NC(CN2CCN(CC2)CC(COC3=CC=CC=C3OC)O)=O)C
14030	832	0.780034	FALSE	TRUE	TRUE	PREGNENOLONE	glucocortcoid, antiinflammatory	CC(=O)[C@H]1CCC2C3CC=C4C[C@@H](O)CC[C@]4(C)C3CC[C@]12C
14030	759	0.780088	FALSE	TRUE	TRUE	ISAXONINE	nerve growth stimulant	CC(C)NC1=NC=CC=N1
14030	891	0.780336	FALSE	TRUE	TRUE	DANAZOL	anterior pituitary suppressant	C[C@]12CCC3C(CCC4=CC5=C(C[C@]34C)C=NO5)C1CC[C@@]2(O)C#C
14030	774	0.781321	FALSE	TRUE	TRUE	PROGLUMIDE	anticholinergic	CCCN(CCC)C(=O)C(CCC(O)=O)NC(=O)C1=CC=CC=C1
TM-L4	674	0.782561	FALSE	TRUE	TRUE	Dorzolamide hydrochloride	Dorzolamide Hydrochloride is the hydrochloride salt form of dorzolamide, an inhibitor of carbonic anhydrase, a zinc-containing enzyme that catalyzes the rapid conversion of carbon dioxide and water into carbonic acid, protons and bicarbonate ions. Distributed throughout many cells and tissues, various carbonic anhydrases play important roles in mineral and metabolic homeostasis.	c12c([C@H](C[C@@H](S1(=O)=O)C)NCC)cc(s2)S(=O)(=O)N.Cl
TM-L4	694	0.782938	FALSE	TRUE	TRUE	Ibuprofen	Ibuprofen is a propionic acid derivate and nonsteroidal anti-inflammatory drug (NSAID) with anti-inflammatory, analgesic, and antipyretic effects. Ibuprofen inhibits the activity of cyclo-oxygenase I and II, resulting in a decreased formation of precursors of prostaglandins and thromboxanes.	c1(C(C(=O)O)C)ccc(cc1)CC(C)C
L2300	847	0.785135	FALSE	TRUE	TRUE	Cyclopamine	Cyclopamine is a specific Hedgehog (Hh) signaling pathway antagonist of Smoothened (Smo) with IC50 of 46 nM.	C1[C@@H](CC2[C@](C1)([C@]3([C@@](CC=2)([C@]4(C(C3)=C(C)[C@]5(O[C@]6([C@]([C@@H]5C)(NC[C@H](C6)C)[H])[H])CC4)[H])[H])[H])C)O
14030	737	0.786932	FALSE	TRUE	TRUE	ESTRIOL	estrogen	C[C@]12CCC3C(CCC4=C3C=CC(O)=C4)C1C[C@@H](O)[C@@H]2O
LOPAC	734	0.788426	FALSE	TRUE	TRUE	GW9662	Irreversible peroxisome proliferator-activated receptor-gamma (PPAR-gamma) inhibitor	[O-][N+](=O)C1=CC=C(Cl)C(=C1)C(=O)NC1=CC=CC=C1
LOPAC	788	0.789257	FALSE	TRUE	TRUE	Amisulpride	selective D2/D3 dopamine receptor antagonist and atypical antipsychotic	CCN1CCCC1CNC(=O)C1=CC(=C(N)C=C1OC)S(=O)(=O)CC
LOPAC	757	0.789257	FALSE	TRUE	TRUE	Dolasetron mesylate hydrate	Dolasetron mesylate hydrate is a highly specific and selective serotonin 5-HT3 receptor antagonist,	O.CS(O)(=O)=O.O=C(O[C@H]1C[C@H]2CC3C[C@@H](C1)N2CC3=O)C1=CNC2=CC=CC=C12
14030	716	0.790548	FALSE	TRUE	TRUE	ROSUVASTATIN CALCIUM	antihyperlipidemic	[Ca++].CC(C)C1=C(\C=C\[C@@H](O)C[C@@H](O)CC([O-])=O)C(=NC(=N1)N(C)S(C)(=O)=O)C1=CC=C(F)C=C1
TM-L4	695	0.790858	FALSE	TRUE	TRUE	Tenofovir Disoproxil Fumarate	Tenofovir Disoproxil Fumarate is a pro-drug, fumaric acid salt form of tenofovir, a nucleoside reverse transcriptase inhibitor analog of adenosine. Tenofovir disoproxil fumarate is prescribed to treat HIV and chronic hepatitis B virus (HBV) in adults.	OC(=O)\C=C\C(O)=O.CC(C)OC(=O)OCOP(=O)(CO[C@H](C)Cn1cnc2c(N)ncnc12)OCOC(=O)OC(C)C
14030	880	0.790963	FALSE	TRUE	TRUE	CHLORPROMAZINE	antiemetic, antipsychotic	CN(C)CCCN1C2=C(SC3=C1C=C(Cl)C=C3)C=CC=C2
14030	722	0.791469	FALSE	TRUE	TRUE	DYPHYLLINE	PDE inhibitor, bronchodilator, vasodilator	CN1C2=C(N(CC(O)CO)C=N2)C(=O)N(C)C1=O
LOPAC	748	0.79175	FALSE	TRUE	TRUE	Quinacrine dihydrochloride	Monoamine oxidase (MAO) inhibitor; antimalarial	Cl.Cl.CCN(CC)CCCC(C)NC1=C2C=C(OC)C=CC2=NC2=C1C=CC(Cl)=C2
14030	775	0.793501	FALSE	TRUE	TRUE	4,4'-DIISOTHIOCYANOSTILBENE-2,2'-SUFONIC ACID SODIUM SALT	ATP transport inhibitor, anion transport inhibitor, antiulcer	[Na+].[Na+].[O-]S(=O)(=O)C1=CC(=CC=C1\C=C\C1=C(C=C(C=C1)N=C=S)S([O-])(=O)=O)N=C=S
14030	925	0.794555	FALSE	TRUE	TRUE	ESTRADIOL	estrogen	C[C@]12CCC3C(CCC4=C3C=CC(O)=C4)C1CC[C@@H]2O
14030	746	0.796263	FALSE	TRUE	TRUE	TODRALAZINE HYDROCHLORIDE	antihypertensive, peripheral vasodilator	Cl.CCOC(=O)NNC1=NN=CC2=CC=CC=C12
14030	761	0.79783	FALSE	TRUE	TRUE	CLOBETASOL PROPIONATE	glucocorticoid, antiinflammatory	CCC(=O)O[C@@]1([C@@H](C)CC2C3CCC4=CC(=O)C=C[C@]4(C)[C@@]3(F)[C@@H](O)C[C@]12C)C(=O)CCl
L2300	792	0.798473	FALSE	TRUE	TRUE	SHAM CONTROL	SHAM CONTROL	SHAM CONTROL
14030	705	0.799272	FALSE	TRUE	TRUE	CHLOROTHIAZIDE	diuretic, antihypertensive	NS(=O)(=O)C1=CC2=C(C=C1Cl)N=CNS2(=O)=O
14030	763	0.800343	FALSE	TRUE	TRUE	PARAXANTHINE	adenosine receptor agonist, CNS stimulant	CN1C=NC2=C1C(=O)N(C)C(=O)N2
LOPAC	752	0.802741	FALSE	TRUE	TRUE	SIB 1757	Highly selective mGlu5 metabotropic glutamate receptor antagonist	CC1=NC(N=NC2=CC=CC=C2)=C(O)C=C1
14030	699	0.803424	FALSE	TRUE	TRUE	16(17)-EPOXY-5-PREGNENOLONE ACETATE		CC(=O)O[C@H]1CC[C@]2(C)C3CC[C@@]4(C)C(C[C@H]5O[C@@]45C(C)=O)C3CC=C2C1
L1900	789	0.803786	FALSE	TRUE	TRUE	SHAM CONTROL	SHAM CONTROL	SHAM CONTROL
14030	744	0.805075	FALSE	TRUE	TRUE	ERYTHROMYCIN ETHYLSUCCINATE	antibacterial	CCOC(=O)CCC(=O)O[C@H]1[C@H](O[C@@H]2[C@@H](C)[C@H](O[C@H]3C[C@@](C)(OC)[C@@H](O)[C@H](C)O3)[C@@H](C)C(=O)O[C@H](CC)[C@@](C)(O)[C@H](O)[C@@H](C)C(=O)[C@H](C)C[C@@]2(C)O)O[C@H](C)C[C@@H]1N(C)C
pfizer	626	0.805595	FALSE	TRUE	TRUE	CP-775146	Lipid Signaling	[Na+].CC(C)C1=CC=C(CC(=O)N2CCC[C@H](C2)C2=CC(OC(C)(C)C([O-])=O)=CC=C2)C=C1
LOPAC	722	0.805772	FALSE	TRUE	TRUE	Caffeic Acid	Antioxidant; inhibits the synthesis of leukotrienes that are involved in immunoregulation and inflammation	OC(=O)\C=C\C1=CC(O)=C(O)C=C1
14030	741	0.80725	FALSE	TRUE	TRUE	RIZATRIPTAN BENZOATE	5HT-1B/1D agonist, antimigraine	OC(=O)C1=CC=CC=C1.CN(C)CCC1=CNC2=CC=C(CN3C=NC=N3)C=C12
LOPAC	728	0.807323	FALSE	TRUE	TRUE	(-)-Perillic acid	Interferes with activity of p21ras and other small G proteins by inhibiting post-translational cysteine isoprenylation	CC(=C)C1CCC(=CC1)C(O)=O
L2300	787	0.807325	FALSE	TRUE	TRUE	SHAM CONTROL	SHAM CONTROL	SHAM CONTROL
TM-L4	774	0.809117	FALSE	TRUE	TRUE	Diclofenac	Diclofenac is a nonsteroidal benzeneacetic acid derivative with anti-inflammatory activity. Diclofenac binds and chelates both isoforms of cyclooxygenase (COX-1 and-2), thereby blocking the conversion of arachidonic acid to pro-inflammatory-proprostaglandins.	c1ccc(c(c1)CC(=O)O)Nc1c(cccc1Cl)Cl
TM-L4	788	0.80929	FALSE	TRUE	TRUE	Selenomethionine	DL-Selenomethionine is a selenium (Se) analogue of methionine in which sulfur is replaced with the trace element selenium. Selenomethionine (SeMet) can incorporate into proteins in place of methionine with no effects on protein structure and function, providing a mechanism for reversible Se storage in organs and tissues.	C[Se]CCC(N)C(O)=O
14030	730	0.809665	FALSE	TRUE	TRUE	SYMCLOSENE	anti-infective	ClN1C(=O)N(Cl)C(=O)N(Cl)C1=O
TM-L4	723	0.809687	FALSE	TRUE	TRUE	Rifamycin sodium salt	Rifamycin is an antibiotic that inhibits bacterial DNA-dependent RNA polymerase. It is effective against Gram-positive bacteria.	[Na+].CO[C@H]1\C=C\O[C@@]2(C)Oc3c(C2=O)c2c(O)cc(NC(=O)\C(C)=C/C=C/[C@H](C)[C@H](O)[C@@H](C)[C@@H](O)[C@@H](C)[C@H](OC(C)=O)[C@@H]1C)c([O-])c2c(O)c3C
14030	785	0.811172	FALSE	TRUE	TRUE	CARBETAPENTANE CITRATE	antitussive	OC(=O)CC(O)(CC(O)=O)C(O)=O.CCN(CC)CCOCCOC(=O)C1(CCCC1)C1=CC=CC=C1
LOPAC	761	0.811389	FALSE	TRUE	TRUE	HEMADO	A3 adenosine receptor agonist	CCCCC#CC1=NC2=C(N=CN2[C@@H]2O[C@H](CO)C(O)[C@@H]2O)C(NC)=N1
14030	802	0.811554	FALSE	TRUE	TRUE	CYCLAMIC ACID	sweetener	OS(=O)(=O)NC1CCCCC1
LOPAC	774	0.811644	FALSE	TRUE	TRUE	DL-p-Chlorophenylalanine methyl ester hydrochloride	Tryptophan hydroxylase inhibitor	Cl.COC(=O)C(N)CC1=CC=C(Cl)C=C1
14030	682	0.812796	FALSE	TRUE	TRUE	ADENOSINE	antiarrhythmic, cardiac depressant	NC1=C2N=CN([C@@H]3O[C@H](CO)[C@@H](O)[C@H]3O)C2=NC=N1
LOPAC	762	0.817082	FALSE	TRUE	TRUE	Imidazole-4-acetic acid hydrochloride	Competitive antagonist at GABA-C receptors	Cl.OC(=O)CC1=CNC=N1
14030	778	0.81812	FALSE	TRUE	TRUE	ACENOCOUMAROL	anticoagulant	CC(=O)CC(C1=CC=C(C=C1)[N+]([O-])=O)C1=C(O)C2=CC=CC=C2OC1=O
14030	695	0.81946	FALSE	TRUE	TRUE	SULBACTAM	b-lactamase inhibitor	CC1(C)C(N2[C@@H](CC2=O)S1(=O)=O)C(O)=O
LOPAC	764	0.819697	FALSE	TRUE	TRUE	Tetraethylammonium chloride	Nicotinic acetylcholine receptor antagonist; K+ channel blocker	[Cl-].CC[N+](CC)(CC)CC
14030	783	0.820122	FALSE	TRUE	TRUE	AVOCATIN A	antibacterial, antifungal	CC(=O)OCC(O)CC(O)CCCCCCCCCCCC=C.CC(=O)OCC(O)CC(O)CCCCCCCCCCCC#C
14030	708	0.821584	FALSE	TRUE	TRUE	SODIUM NITROPRUSSIDE	antihypertensive	[Na+].[Na+].O=N[Fe--](C#N)(C#N)(C#N)(C#N)C#N
14030	807	0.821995	FALSE	TRUE	TRUE	PHENAZOPYRIDINE HYDROCHLORIDE	analgesic	Cl.NC1=NC(N)=C(C=C1)\N=N\C1=CC=CC=C1
LOPAC	743	0.822625	FALSE	TRUE	TRUE	Tetraethylthiuram disulfide	Alcohol dehydrogenase inhibitor	CCN(CC)C(=S)SSC(=S)N(CC)CC
TM-L4	775	0.824562	FALSE	TRUE	TRUE	Disodium monofluorophosphate	Sodium Monofluorophosphate is a competitive inhibitor of pyruvate kinase and alkaline phosphatase, which also irreversibly inhibits phosphorylase phosphatase.	O=P([O-])(F)[O-].[Na+].[Na+]
TM-L4	756	0.824635	FALSE	TRUE	TRUE	Liothyronine sodium	Liothyronine Sodium is the sodium salt form of liothyronine, a synthetic form of the levorotatory isomer of the naturally occurring thyroid hormone triiodothyronine (T3). Liothyronine sodium binds to nuclear thyroid receptors which then bind to thyroid hormone response elements of target genes. As a result, liothyronine sodium induces gene expression that is required for normal growth and develop…	[Na+].C(=O)([C@H](Cc1cc(c(c(c1)I)Oc1cc(c(cc1)O)I)I)N)[O-]
TM-L4	662	0.824871	FALSE	TRUE	TRUE	Netilmicin sulfate	Netilmicin Sulfate is an aminoglycoside antibiotic.	CCN[C@@H]1C[C@@H]([C@H]([C@@H]([C@H]1O[C@@H]2[C@@H]([C@H]([C@@](CO2)(C)O)NC)O)O)O[C@@H]3[C@@H](CC=C(O3)CN)N)N.CCN[C@@H]1C[C@@H]([C@H]([C@@H]([C@H]1O[C@@H]2[C@@H]([C@H]([C@@](CO2)(C)O)NC)O)O)O[C@@H]3[C@@H](CC=C(O3)CN)N)N.OS(=O)(=O)O.OS(=O)(=O)O.OS(=O)(=O)O.OS(=O)(=O)O.OS(=O)(=O)O
TM-L4	756	0.82557	FALSE	TRUE	TRUE	Selegiline hydrochloride	Selegiline hydrochloride is a selective, reversible inhibitor of MAO-B (Ki = 0.091 μM) over MAO-A (Ki = 9.06 μM). Monoamine oxidase (MAO) inhibitors have utility in ameliorating a variety of neurological conditions, including depression.	Cl.C[C@H](Cc1ccccc1)N(C)CC#C
L1900	717	0.827312	FALSE	TRUE	TRUE	SHAM CONTROL	SHAM CONTROL	SHAM CONTROL
L2300	758	0.827894	FALSE	TRUE	TRUE	SHAM CONTROL	SHAM CONTROL	SHAM CONTROL
TM-L4	695	0.828571	FALSE	TRUE	TRUE	AHU377	AHU-377 is a potent NEP inhibitor with an IC50 of 5 nM. AHU-377 is a component of the heart failure medicine LCZ696.	CCOC(=O)[C@H](C)C[C@@H](Cc1ccc(cc1)-c1ccccc1)NC(=O)CCC(O)=O
LOPAC	741	0.829186	FALSE	TRUE	TRUE	EBPC	EBPC is an aldose reductase inhibitor; anti-cancer.	CCOC(=O)C1=C(O)C(=O)N(CC2=CC=CC=C2)C1
TM-L4	700	0.829291	FALSE	TRUE	TRUE	Dimethyl fumarate	Dimethyl fumarate, a fumarate derivative, is used as antiinflammatory and immunomodulatory agent.	COC(=O)/C=C/C(=O)OC
TM-L4	720	0.829291	FALSE	TRUE	TRUE	Pioglitazone hydrochloride	Pioglitazone Hydrochloride is the hydrochloride salt of an orally-active thiazolidinedione with antidiabetic properties and potential antineoplastic activity.	Cl.CCc1ccc(CCOc2ccc(CC3SC(=O)NC3=O)cc2)nc1
TM-L4	701	0.829358	FALSE	TRUE	TRUE	Reserpine	Reserpine is an alkaloid found in the roots of Rauwolfia serpentina and R. vomitoria. Reserpine inhibits the uptake of norepinephrine into storage vesicles resulting in depletion of catecholamines and serotonin from central and peripheral axon terminals. It has been used as an antihypertensive and an antipsychotic as well as a research tool, but its adverse effects limit its clinical use.	CO[C@H]1[C@@H](C[C@@H]2CN3CCc4c([nH]c5cc(OC)ccc45)[C@H]3C[C@@H]2[C@@H]1C(=O)OC)OC(=O)c1cc(OC)c(OC)c(OC)c1
14030	783	0.829811	FALSE	TRUE	TRUE	AGELASINE	cytotoxic, antineoplastic	[Cl-].CC1CCC2(C)[C@@H](CCC=C2C)[C@]1(C)CC\C(C)=C\CN1C=[N+](C)C2=C1N=CN=C2N
14030	664	0.830074	FALSE	TRUE	TRUE	BENZTHIAZIDE	diuretic, antihypertensive	NS(=O)(=O)C1=CC2=C(C=C1Cl)N=C(CSCC1=CC=CC=C1)NS2(=O)=O
L1200	784	0.830799	FALSE	TRUE	TRUE	OSI-027	OSI-027 is a selective and potent dual inhibitor of mTORC1 and mTORC2 with IC50 of 22 nM and 65 nM, and more than 100-fold selectivity observed for mTOR than PI3Kα, PI3Kβ, PI3Kγ or DNA-PK.	N1C=NN2C(C=1N)=C(N=C2[C@@H]3CC[C@H](CC3)C(=O)O)C4NC5=C(C=4)C=CC=C5OC
14030	969	0.833739	FALSE	TRUE	TRUE	HYDROCORTISONE	glucocorticoid, antiinflammatory	C[C@]12C[C@H](O)C3C(CCC4=CC(=O)CC[C@]34C)C1CC[C@]2(O)C(=O)CO
14030	712	0.836071	FALSE	TRUE	TRUE	PREDNISONE	glucocorticoid	C[C@]12CC(=O)C3C(CCC4=CC(=O)C=C[C@]34C)C1CC[C@]2(O)C(=O)CO
14030	776	0.837119	FALSE	TRUE	TRUE	TROCLOSENE POTASSIUM	antiinfective	[K+].ClN1C(=O)[N-]C(=O)N(Cl)C1=O
TM-L4	751	0.838061	FALSE	TRUE	TRUE	Amitriptyline hydrochloride	Amitriptyline Hydrochloride is the hydrochloride salt of the tricyclic dibenzocycloheptadiene amitriptyline with antidepressant and antinociceptive activities.	Cl.CN(C)CC\C=C1\c2ccccc2CCc2ccccc12
TM-L4	748	0.838061	FALSE	TRUE	TRUE	Erlotinib hydrochloride	Erlotinib is an EGFR inhibitor (IC50: 2 nM). It is used for the treatment of non-small cell lung cancer.	Cl.COCCOc1cc2ncnc(Nc3cccc(c3)C#C)c2cc1OCCOC
L1200	728	0.840376	FALSE	TRUE	TRUE	NU7441 (KU-57788)	NU7441 is a highly potent and selective DNA-PK inhibitor with IC50 of 14 nM and also inhibits PI3K with IC50 of 5 μM.	C1=C(OC2=C(C1=O)C=CC=C2C3=CC=CC4=C3SC5=C4C=CC=C5)N6CCOCC6
L2300	765	0.840413	FALSE	TRUE	TRUE	SHAM CONTROL	SHAM CONTROL	SHAM CONTROL
TM-L4	729	0.842565	FALSE	TRUE	TRUE	SHAM CONTROL	SHAM CONTROL	SHAM CONTROL
LOPAC	776	0.843079	FALSE	TRUE	TRUE	ABT-418 hydrochloride	Neuronal nicotinic acetylcholine receptor agonist with cognition enhancing and anxiolytic activities	Cl.CN1CCC[C@H]1C1=CC(C)=NO1
L2300	705	0.843176	FALSE	TRUE	TRUE	Erlotinib HCl	Erlotinib HCl is an HER1/EGFR inhibitor with IC50 of 2 nM.	C1(=CC=CC(=C1)C#C)NC2(=NC=NC3=C2C=C(C(=C3)OCCOC)OCCOC).Cl
LOPAC	755	0.843344	FALSE	TRUE	TRUE	Genistein	Cytotoxic inhibitor of tyrosine kinase and topoisomerase II kinase	OC1=CC=C(C=C1)C1=COC2=C(C(O)=CC(O)=C2)C1=O
L2300	736	0.844741	FALSE	TRUE	TRUE	SHAM CONTROL	SHAM CONTROL	SHAM CONTROL
14030	909	0.846691	FALSE	TRUE	TRUE	FURAZOLIDONE	antibacterial	O=C1OCCN1\N=C\C1=CC=C(O1)N(=O)=O
L1200	881	0.847761	FALSE	TRUE	TRUE	AR-A014418	AR-A014418 is an ATP-competitive, and selective GSK3β inhibitor with IC50 and Ki of 104 nM and 38 nM, without significant inhibition on 26 other kinases tested.	C1=C(SC(=N1)NC(NCC2=CC=C(C=C2)OC)=O)[N+](=O)[O-]
14030	714	0.848667	FALSE	TRUE	TRUE	ALVERINE CITRATE	anticholinergic	OC(=O)CC(O)(CC(O)=O)C(O)=O.CCN(CCCC1=CC=CC=C1)CCCC1=CC=CC=C1
14030	702	0.848667	FALSE	TRUE	TRUE	CYPROTERONE ACETATE	antiandrogen	CC(=O)O[C@@]1(CCC2C3C=C(Cl)C4=CC(=O)[C@@H]5C[C@@H]5[C@]4(C)C3CC[C@]12C)C(C)=O
L2300	767	0.848773	FALSE	TRUE	TRUE	SHAM CONTROL	SHAM CONTROL	SHAM CONTROL
14030	817	0.849314	FALSE	TRUE	TRUE	4'-HYDROXYCHALCONE	antineoplastic,	OC1=CC=C(C=C1)C(=O)\C=C\C1=CC=CC=C1
LOPAC	775	0.849921	FALSE	TRUE	TRUE	IB-MECA	Selective A3 adenosine receptor agonist	CNC(=O)[C@H]1O[C@H](C(O)[C@H]1O)N1C=NC2=C1N=CN=C2NCC1=CC(I)=CC=C1
LOPAC	770	0.849987	FALSE	TRUE	TRUE	Ifenprodil tartrate	Blocks the polyamine binding site associated with the NMDA glutamate receptor; neuroprotective	OC(C(O)C(O)=O)C(O)=O.CC(C(O)C1=CC=C(O)C=C1)N1CCC(CC2=CC=CC=C2)CC1.CC(C(O)C1=CC=C(O)C=C1)N1CCC(CC2=CC=CC=C2)CC1
LOPAC	700	0.849987	FALSE	TRUE	TRUE	Dantrolene sodium	Inhibits intracellular Ca2+ release from the sarcoplasmic reticulum; muscle relaxant.	[Na+].O=C1CN(\N=C\C2=CC=C(O2)C2=CC=C(C=C2)N(=O)=O)C(=O)[N-]1
14030	805	0.84999	FALSE	TRUE	TRUE	LARIXOL		C[C@](O)(CCC1C(=C)C[C@H](O)C2C(C)(C)CCCC12C)C=C
14030	891	0.852151	FALSE	TRUE	TRUE	ACETAMINOPHEN	analgesic, antipyretic	CC(=O)NC1=CC=C(O)C=C1
14030	799	0.852307	FALSE	TRUE	TRUE	CIMICIFUGOSIDE H1	estrogen	C[C@H](CC(=O)C1OC1(C)C)[C@H]1C(=O)C[C@@]2(C)C3=CCC4[C@]5(C[C@@]35[C@@H](O)C[C@]12C)CC[C@H](O[C@@H]1OC[C@@H](O)[C@H](O)[C@H]1O)C4(C)C
14030	738	0.852318	FALSE	TRUE	TRUE	NICLOSAMIDE	anthelmintic, teniacide	OC1=CC=C(Cl)C=C1C(=O)NC1=C(Cl)C=C(C=C1)[N+]([O-])=O
LOPAC	823	0.852748	FALSE	TRUE	TRUE	SMER28	Small molecule modulator of mammalian autophagy.	BrC1=CC=C2N=CN=C(NCC=C)C2=C1
L2300	790	0.855427	FALSE	TRUE	TRUE	SHAM CONTROL	SHAM CONTROL	SHAM CONTROL
LOPAC	813	0.855469	FALSE	TRUE	TRUE	Benserazide hydrochloride	Peripheral decarboxylase inhibitor	Cl.NC(CO)C(=O)NNCC1=CC=C(O)C(O)=C1O
LOPAC	798	0.856014	FALSE	TRUE	TRUE	AB-MECA	High affinity A3 adenosine receptor agonist	CNC(=O)[C@H]1O[C@H](C(O)[C@H]1O)N1C=NC2=C1N=CN=C2NCC1=CC=C(N)C=C1
14030	744	0.85828	FALSE	TRUE	TRUE	DROPROPIZINE	antitussive	OCC(O)CN1CCN(CC1)C1=CC=CC=C1
LOPAC	798	0.858574	FALSE	TRUE	TRUE	Idazoxan hydrochloride	I2-imidazoline agonist; I1-imidazoline antagonist; alpha2-Adrenergic antagonist	Cl.C1CN=C(N1)C1COC2=CC=CC=C2O1
L2300	820	0.859421	FALSE	TRUE	TRUE	KU-60019	KU-60019 is a potent and specific ATM inhibitor with IC50 of 6.3 nM.	C1=C(C=CC2=C1CC3=C(S2)C(=CC=C3)C4=CC(C=C(O4)N5CCOCC5)=O)NC(CN6C[C@@H](O[C@@H](C6)C)C)=O
L1200	779	0.859854	FALSE	TRUE	TRUE	Tofacitinib (CP-690550,Tasocitinib)	Tofacitinib is a novel inhibitor of JAK3 with IC50 of 1 nM, 20- to 100-fold less potent against JAK2 and JAK1.	N1=CN=C2C(=C1N(C)[C@H]3CN(CC[C@@H]3C)C(=O)CC#N)C=CN2
TM-L4	684	0.861447	FALSE	TRUE	TRUE	Perindopril erbumine	Perindopril Erbumine is the tert-butylamine salt of perindopril, the ethyl ester of a non-sulfhydryl angiotensin-converting enzyme (ACE) inhibitor with antihypertensive activity. Upon hydrolysis, perindopril erbumine is converted to its active form perindoprilat, inhibiting ACE and the conversion of angiotensin I to angiotensin II; consequently, angiotensin II-mediated vasoconstriction and angiot…	CC(C)(C)N.N1([C@@H]2[C@H](C[C@H]1C(=O)O)CCCC2)C(=O)[C@@H](N[C@H](C(=O)OCC)CCC)C
TM-L4	792	0.861619	FALSE	TRUE	TRUE	Adefovir dipivoxil	Adefovir Dipivoxil is a dipivoxil formulation of adefovir, a nucleoside reverse transcriptase inhibitor analog of adenosine with activity against hepatitis B virus (HBV), herpes virus, and human immunodeficiency virus (HIV).	CC(C)(C)C(=O)OCOP(=O)(COCCn1cnc2c1ncnc2N)OCOC(=O)C(C)(C)C
14030	763	0.861867	FALSE	TRUE	TRUE	MEXICANOLIDE		COC(=O)C[C@H]1C(C)(C)C(=O)[C@@H]2CC3=C4CC(=O)O[C@@H](C5=COC=C5)[C@]4(C)CCC3[C@@]1(C)C2=O
LOPAC	763	0.861882	FALSE	TRUE	TRUE	Amiodarone hydrochloride	alpha and beta adrenoceptor agonist; inhibits binding of 1,4-dihydropyridine to L-type Ca2+ channels; coronary vasodilator	Cl.CCCCC1=C(C(=O)C2=CC(I)=C(OCCN(CC)CC)C(I)=C2)C2=CC=CC=C2O1
14030	868	0.863666	FALSE	TRUE	TRUE	NORETHYNODREL	progestogen, in combination with estrogen as oral contraceptive	C[C@]12CCC3C(CCC4=C3CCC(=O)C4)C1CC[C@@]2(O)C#C
LOPAC	691	0.864301	FALSE	TRUE	TRUE	Retinoic acid	Induces caspase-dependent apoptosis	C\C(\C=C\C1=C(C)CCCC1(C)C)=C/C=C/C(/C)=C/C(O)=O
LOPAC	699	0.865267	FALSE	TRUE	TRUE	(±)-Chlorpheniramine maleate	H1 Histamine receptor antagonist	OC(=O)\C=C/C(O)=O.CN(C)CCC(C1=CC=C(Cl)C=C1)C1=NC=CC=C1
L2300	791	0.866296	FALSE	TRUE	TRUE	Fenretinide		C1(C(CCCC=1C)(C)C)/C=C/C(=C/C=C/C(=C/C(NC2C=CC(=CC=2)O)=O)C)C
L1200	806	0.867358	FALSE	TRUE	TRUE	NU7026	NU7026 is a potent DNA-PK inhibitor with IC50 of 0.23 μM, 60-fold selective for DNA-PK than PI3K and inactive against both ATM and ATR.	C1(OC2=C(C=CC3=C2C=CC=C3)C(C=1)=O)N4CCOCC4
14030	751	0.870909	FALSE	TRUE	TRUE	TRIAMCINOLONE	glucocorticoid	C[C@]12C[C@H](O)[C@@]3(F)C(CCC4=CC(=O)C=C[C@]34C)C1C[C@@H](O)[C@]2(O)C(=O)CO
L1200	790	0.872673	FALSE	TRUE	TRUE	PH-797804	PH-797804 is a novel pyridinone inhibitor of p38α with IC50 of 26 nM; 4-fold more selective versus p38β and does not inhibit JNK2. Phase 2.	C1(=C(C=CC(=C1)C(=O)NC)C)N2C(=CC(=C(C2=O)Br)OCC3=CC=C(C=C3F)F)C
TM-L4	756	0.874002	FALSE	TRUE	TRUE	Gemifloxacin mesylate	Gemifloxacin mesylate inhibits activities of DNA gyrase and topoisomerase IV, thereby inhibiting DNA replication and eventually bacterial growth. Gemifloxacin Mesylate is the mesylate salt form of gemifloxacin, a synthetic broad-spectrum fluoroquinolone with antibacterial activity. This fluoroquinolone exerts an enhanced spectrum of activity against gram-positive bacteria such as Streptococcus pn…	n1(cc(c(=O)c2cc(c(nc12)N1CC(/C(=N/OC)/C1)CN)F)C(=O)O)C1CC1.CS(=O)(=O)O
TM-L4	812	0.874202	FALSE	TRUE	TRUE	SHAM CONTROL	SHAM CONTROL	SHAM CONTROL
TM-L4	775	0.874375	FALSE	TRUE	TRUE	Hodostin	Hodostin is a reversible inhibitor of acetylcholinesterase, can not cross the blood-brain barrier, used in the treatment of myasthenia gravis.	c1(cc(ccc1)[N+](C)(C)C)OC(=O)N(C)C.S(=O)(=O)(OC)[O-]
TM-L4	764	0.875487	FALSE	TRUE	TRUE	Boceprevir	Boceprevir is a novel, potent, highly selective, orally bioavailable HCV NS3 protease inhibitor with Ki of 14 nM in both enzyme assay and EC90 of 350 nM in cell-based replicon assay.	CC(C)(C)NC(=O)N[C@H](C(=O)N1C[C@H]2[C@@H]([C@H]1C(=O)NC(CC1CCC1)C(=O)C(N)=O)C2(C)C)C(C)(C)C
L2300	740	0.87671	FALSE	TRUE	TRUE	Abitrexate (Methotrexate)	Abitrexate(Methotrexate) is an antimetabolite and antifolate agent with antineoplastic and immunosuppressant activities.	N1=C(N=C2C(=C1N)N=C(C=N2)CN(C3=CC=C(C=C3)C(N[C@@H](CCC(=O)O)C(=O)O)=O)C)N
TM-L4	742	0.877019	FALSE	TRUE	TRUE	Cephalotaxine	Cephalotaxine is an antiviral and an antitumor agent.	O[C@H]1[C@@H]2[C@@]3(N(CCc4c2cc2OCOc2c4)CCC3)C=C1OC
L2300	752	0.879062	FALSE	TRUE	TRUE	SHAM CONTROL	SHAM CONTROL	SHAM CONTROL
TM-L4	798	0.879374	FALSE	TRUE	TRUE	Dolasetron	Dolasetron(MDL-73147) is a serotonin 5-HT3 receptor antagonist used to treat nausea and vomiting following chemotherapy.	O=C(O[C@H]1C[C@H]2C[C@H]3C[C@@H](C1)N2CC3=O)c1c[nH]c2ccccc12
L2300	658	0.879911	FALSE	TRUE	TRUE	Ku-0063794	KU-0063794 is a potent and highly specific mTOR inhibitor for both mTORC1 and mTORC2 with IC50 ~10 nM.	N1=C(N=C2C(=C1N3CCOCC3)C=CC(=N2)C4=CC(=C(C=C4)OC)CO)N5C[C@H](O[C@H](C5)C)C
14030	716	0.880212	FALSE	TRUE	TRUE	ESTRADIOL VALERATE	estrogen	CCCCC(=O)O[C@H]1CCC2C3CCC4=C(C=CC(O)=C4)C3CC[C@]12C
14030	668	0.880716	FALSE	TRUE	TRUE	BENZOCAINE	anesthetic (topical)	CCOC(=O)C1=CC=C(N)C=C1
L1900	820	0.880894	FALSE	TRUE	TRUE	CCT129202	CCT129202 is an ATP-competitive pan-Aurora inhibitor for Aurora A, Aurora B and Aurora C with IC50 of 0.042 μM, 0.198 μM and 0.227 μM, respectively. It is less potent to FGFR3, GSK3β, PDGFRβ, etc.	C1(=CN=C2C(=C1N3CCN(CC3)CC(NC4SC=CN=4)=O)N=C(N2)C5=CC=C(C=C5)N(C)C)Cl
L1200	770	0.881382	FALSE	TRUE	TRUE	AZ20	AZ20 is a novel potent and selective inhibitor of ATR kinase with IC50 of 5 nM, 8-fold selectivity over mTOR.	C1=C(N=C(N=C1N2[C@@H](COCC2)C)C3=CC=CC4=C3C=CN4)C5(S(C)(=O)=O)CC5
14030	822	0.881506	FALSE	TRUE	TRUE	IDEBENONE	cognition enhancer, nootropic	COC1=C(OC)C(=O)C(CCCCCCCCCCO)=C(C)C1=O
14030	705	0.882776	FALSE	TRUE	TRUE	EQUILIN	estrogen	CC12CCC3C(=CCC4=C3C=CC(O)=C4)C1CCC2=O
TM-L4	722	0.882848	FALSE	TRUE	TRUE	Droxidopa	Droxidopa is an orally available prodrug of norepinephrine that is used in the treatment of symptomatic orthostatic hypotension due to neurogenic causes of autonomic failure.	N[C@@H]([C@H](O)c1ccc(O)c(O)c1)C(O)=O
TM-L4	779	0.883196	FALSE	TRUE	TRUE	Doravirine	Doravirine is a non-nucleoside reverse transcriptase inhibitor, used in the treatment of HIV/AIDS.	Cn1c(n[nH]c1=O)Cn1ccc(c(c1=O)Oc1cc(cc(c1)C#N)Cl)C(F)(F)F
L2300	776	0.883852	FALSE	TRUE	TRUE	GW 9508		C(=O)(CCC1=CC=C(NCC2C=C(OC3=CC=CC=C3)C=CC=2)C=C1)O
14030	772	0.884533	FALSE	TRUE	TRUE	ANABASAMINE HYDROCHLORIDE	anticholinesterase	Cl.CN1CCCCC1C1=CN=C(C=C1)C1=CC=CN=C1
14030	729	0.886372	FALSE	TRUE	TRUE	AMANTADINE HYDROCHLORIDE	antiviral, antiparkinsonian; treatment of drug-induced extrapyrimidal reactions	Cl.NC12CC3CC(CC(C3)C1)C2
L2300	816	0.886782	FALSE	TRUE	TRUE	Afatinib (BIBW2992)	BIBW2992 (Afatinib, Tomtovok, Tovok) irreversibly inhibits EGFR/HER2 including EGFRwt, EGFRL858R, EGFRL858R/T790M and HER2 with IC50 of 0.5 nM, 0.4 nM, 10 nM and 14 nM, respectively.	C1(=C(C=C(C=C1)NC2=NC=NC3=C2C=C(C(=C3)O[C@H]4CCOC4)NC(/C=C/CN(C)C)=O)Cl)F
14030	757	0.887235	FALSE	TRUE	TRUE	LANATOSIDE C	cardiotonic	C[C@H]1O[C@H](C[C@H](O)[C@@H]1O[C@H]1C[C@H](O)[C@H](O[C@H]2C[C@H](OC(C)=O)[C@H](O[C@@H]3O[C@H](CO)[C@@H](O)[C@H](O)[C@H]3O)[C@@H](C)O2)[C@@H](C)O1)O[C@H]1CC[C@@]2(C)C(CCC3C2C[C@@H](O)[C@]2(C)[C@H](CC[C@]32O)C2=CC(=O)OC2)C1
TM-L4	658	0.887597	FALSE	TRUE	TRUE	Tauroursodeoxycholic Acid	Tauroursodeoxycholic acid is the more hydrophilic form of ursodeoxycholic acid, which is the more abundant naturally produced bile acid in humans. Tauroursodeoxycholic acid, on the other hand, is produced abundantly in bears and has been used for centuries as a natural remedy in some Asian countries. Tauroursodeoxycholic acid is being investigated for use in several conditions such as Primary Bil…	C(CNC(=O)CC[C@H]([C@H]1CC[C@H]2[C@@H]3[C@H](C[C@@H]4C[C@@H](CC[C@@]4([C@H]3CC[C@]12C)C)O)O)C)S(=O)(=O)O
14030	911	0.891553	FALSE	TRUE	TRUE	LEUCOVORIN CALCIUM	antianemic, antidote to folic acid antagonists	[Ca++].NC1=NC(=O)C2=C(NCC(CNC3=CC=C(C=C3)C(=O)N[C@@H](CCC([O-])=O)C([O-])=O)N2C=O)N1
LOPAC	745	0.891631	FALSE	TRUE	TRUE	BTO-1	Polo-like kinase (Plk) inhibitor.	NC(=O)C1=[N+]([O-])C2=CC(=CC(=C2S1)[N+]([O-])=O)C#N
TM-L4	730	0.892695	FALSE	TRUE	TRUE	SHAM CONTROL	SHAM CONTROL	SHAM CONTROL
L2300	781	0.893168	FALSE	TRUE	TRUE	SHAM CONTROL	SHAM CONTROL	SHAM CONTROL
TM-L4	673	0.894289	FALSE	TRUE	TRUE	d-penicillamin	Artamine, possessing antineoplastic properties, induces apoptosis by a p53-mediated mechanism and inhibits angiogenesis by chelating with copper, a cofactor for angiogenesis. Artamine is a beta dimethyl analog of the amino acid cysteine. As a degradation product of penicillin antibiotics, Artamine chelates with heavy metals and increases their urinary excretion.	[C@@H](C(S)(C)C)(C(=O)O)N
L2300	786	0.894608	FALSE	TRUE	TRUE	SHAM CONTROL	SHAM CONTROL	SHAM CONTROL
14030	816	0.895943	FALSE	TRUE	TRUE	OCTOCRYLENE	sunscreen	CCCC[C@@H](CC)COC(=O)C(C#N)=C(C1=CC=CC=C1)C1=CC=CC=C1
14030	704	0.898244	FALSE	TRUE	TRUE	CEDRELONE		C[C@@]12CCC3[C@@]4(C)C=CC(=O)C(C)(C)C4=C(O)C(=O)[C@@]3(C)[C@]11O[C@@H]1C[C@H]2C1=COC=C1
14030	699	0.899069	FALSE	TRUE	TRUE	ACETAMINOPHEN	analgesic, antipyretic	CC(=O)NC1=CC=C(O)C=C1
TM-L4	755	0.899213	FALSE	TRUE	TRUE	Desoximetasone	Desoximetasone(Topicort) is a medication belonging to the family of medications known as topical corticosteroids; is used for the relief of various skin conditions, including rashes.	C[C@@H]1C[C@H]2[C@@H]3CCC4=CC(=O)C=C[C@]4(C)[C@@]3(F)[C@@H](O)C[C@]2(C)[C@H]1C(=O)CO
14030	771	0.899223	FALSE	TRUE	TRUE	CEFORANIDE	antibacterial	NCC1=CC=CC=C1CC(=O)NC1C2SCC(CSC3=NN=NN3CC(O)=O)=C(N2C1=O)C(O)=O
TM-L4	729	0.900722	FALSE	TRUE	TRUE	Roflumilast N-oxide	Roflumilast N-oxide is a PDE type 4 inhibitor.	[O-][n+]1cc(Cl)c(NC(=O)c2ccc(OC(F)F)c(OCC3CC3)c2)c(Cl)c1
TM-L4	718	0.901944	FALSE	TRUE	TRUE	Montelukast sodium	Montelukast is an orally available leukotriene receptor antagonist which is widely used for the prophylaxis and chronic treatment of asthma and has been linked to rare cases of clinically apparent liver injury.	C(S[C@@H](c1cc(/C=C/c2nc3c(cc2)ccc(c3)Cl)ccc1)CCc1c(cccc1)C(O)(C)C)C1(CC1)CC(=O)[O-].[Na+]
TM-L4	676	0.905007	FALSE	TRUE	TRUE	Nimodipine	Nimodipine, a 1, 4-dihydropyridine calcium channel blocker, acts primarily on vascular smooth muscle cells.	COCCOC(=O)C1=C(C)NC(=C(C1c1cc(ccc1)[N+](=O)[O-])C(=O)OC(C)C)C
14030	706	0.905225	FALSE	TRUE	TRUE	CORTISONE ACETATE	glucocorticoid	CC(=O)OCC(=O)[C@@]1(O)CCC2C3CCC4=CC(=O)CC[C@]4(C)C3C(=O)C[C@]12C
14030	723	0.905677	FALSE	TRUE	TRUE	HOMATROPINE HYDROBROMIDE	anticholinergic (opthalmic)	Br.CN1C2CC[C@H]1C[C@H](C2)OC(=O)C(O)C1=CC=CC=C1
14030	752	0.906522	FALSE	TRUE	TRUE	PRAZIQUANTEL	anthelmintic	O=C(C1CCCCC1)N1CC2N(CCC3=C2C=CC=C3)C(=O)C1
14030	735	0.90698	FALSE	TRUE	TRUE	FENCLONINE (+/-)	serotonin inhibitor; tryptophan hydroxylase inhibitor	Cl.NC(CC1=CC=C(Cl)C=C1)C(O)=O
TM-L4	839	0.907384	FALSE	TRUE	TRUE	Clotrimazole	Clotrimazole, an imidazole derivative with a broad spectrum of antimycotic activity, inhibits biosynthesis of the sterol ergostol.	Clc1ccccc1C(n1ccnc1)(c1ccccc1)c1ccccc1
14030	745	0.907718	FALSE	TRUE	TRUE	TRAMIPROSATE	antibacterial; GABA agonist	NCCCS(O)(=O)=O
L2300	759	0.90847	FALSE	TRUE	TRUE	Canagliflozin	Canagliflozin is a highly potent and selective SGLT2 inhibitor for CHO-hSGLT2, CHO-rSGLT2 and CHO-mSGLT2 with IC50 of 4.4 nM, 3.7 nM and 2 nM, respectively.	[C@H]1([C@H]([C@@H]([C@H]([C@@H](O1)C2=CC(=C(C=C2)C)CC3SC(=CC=3)C4=CC=C(C=C4)F)O)O)O)CO
L1200	770	0.909308	FALSE	TRUE	TRUE	Pazopanib	Pazopanib is a novel multi-target inhibitor of VEGFR1, VEGFR2, VEGFR3, PDGFR, FGFR, c-Kit and c-Fms with IC50 of 10 nM, 30 nM, 47 nM, 84 nM, 74 nM, 140 nM and 146 nM, respectively.	C1(C(=CC=C(C=1)NC2N=C(C=CN=2)N(C)C3C=CC4=C(N(N=C(C=3)4)C)C)C)S(=O)(=O)N
LOPAC	733	0.91054	FALSE	TRUE	TRUE	Lithium Chloride	Anti-manic drug used in the treatment of bipolar depression; inhibitor of inositol monophosphatase	[Li]Cl
14030	741	0.91138	FALSE	TRUE	TRUE	TRIMEPRAZINE TARTRATE	antipruritic	OC(C(O)C(O)=O)C(O)=O.CC(CN(C)C)CN1C2=C(SC3=C1C=CC=C3)C=CC=C2
14030	778	0.911535	FALSE	TRUE	TRUE	FTAXILIDE	antiulcer	CC1=CC=CC(C)=C1NC(=O)C1=CC=CC=C1C(O)=O
L2300	668	0.912716	FALSE	TRUE	TRUE	Azacitidine (Vidaza)	Azacitidine(Vidaza)and its deoxy derivative, decitabine (5-aza-2′deoxycytidine), are used in the treatment of myelodysplastic syndrome.	[C@H]1([C@H](O[C@H]([C@H]1O)N2C(N=C(N=C2)N)=O)CO)O
LOPAC	705	0.913811	FALSE	TRUE	TRUE	2,3-Butanedione monoxime	Blocks ATP-sensitive K+ channels	CC(=O)C(\C)=N\O
TM-L4	685	0.914399	FALSE	TRUE	TRUE	Deflazacort	Deflazacort is a glucocorticoid served as an immunosuppressant and anti-inflammatory. It can be used to treat autoimmune diseases due to inhibiting the immune system. It can also be acted in the therapy of some types of Ys. Deflazacort can help to prevent and to treat the rejection of transplanted organs.	CC1=N[C@@]2([C@H](O1)C[C@@H]1[C@@]2(C[C@@H]([C@H]2[C@H]1CCC1=CC(=O)C=C[C@]21C)O)C)C(=O)COC(=O)C
14030	693	0.914527	FALSE	TRUE	TRUE	BETAMETHASONE	glucocorticoid, antiinflammatory	C[C@H]1CC2C3CCC4=CC(=O)C=C[C@]4(C)[C@@]3(F)[C@@H](O)C[C@]2(C)[C@@]1(O)C(=O)CO
14030	690	0.914881	FALSE	TRUE	TRUE	PHLORACETOPHENONE		CC(=O)C1=C(O)C=C(O)C=C1O
L2300	693	0.91508	FALSE	TRUE	TRUE	GDC-0941	GDC-0941 is a potent inhibitor of PI3Kα, PI3Kβ, PI3Kδ and PI3Kγ with IC50 of 3 nM, 33 nM, 3 nM and 75 nM, respectively.	C1(=CC=CC2=C1C=NN2)C3=NC(=C4C(=N3)C=C(S4)CN5CCN(CC5)S(=O)(=O)C)N6CCOCC6
LOPAC	669	0.915759	FALSE	TRUE	TRUE	CGP 20712A methanesulfonate	Selective beta1-adrenoceptor antagonist	CS(O)(=O)=O.CN1C=C(N=C1C1=CC=C(OCC(O)CNCCOC2=CC(C(N)=O)=C(O)C=C2)C=C1)C(F)(F)F
L1200	832	0.916277	FALSE	TRUE	TRUE	GDC-0349	GDC-0349 is a potent and selective ATP-competitive inhibitor of mTOR with Ki of 3.8 nM, 790-fold inhibitory effect against PI3Kα and other 266 kinases. Phase 1.	N(C(=O)NC1C=CC(=CC=1)C2N=C3C(=C(N=2)N4[C@H](COCC4)C)CCN(C3)C5COC5)CC
TM-L4	703	0.916957	FALSE	TRUE	TRUE	Mycophenolate Mofetil	Mycophenolate mofetil, an immunosuppressive agent, is the 2-morpholinoethyl ester of mycophenolic acid (MPA), and an inhibitor of inosine monophosphate dehydrogenase (IMPDH).	CC1=C(C(=C(C2=C1COC2=O)O)C/C=C(\C)/CCC(=O)OCCN3CCOCC3)OC
14030	809	0.916989	FALSE	TRUE	TRUE	BENZONATATE	antitussive	CCCCNC1=CC=C(C=C1)C(=O)OCCOCCOCCOCCOCCOCCOCCOCCOCCOC
L1200	807	0.918339	FALSE	TRUE	TRUE	10058-F4	10058-F4 is a c-Myc inhibitor that specificallly inhibits the c-Myc-Max interaction and prevents transactivation of c-Myc target gene expression.	C1=C(C=CC(=C1)/C=C2\C(NC(S2)=S)=O)CC
LOPAC	739	0.918441	FALSE	TRUE	TRUE	AS605240	AS605240 is a potent and selective PI3K inhibitor	O=C1NC(=O)\C(S1)=C\C1=CC=C2N=CC=NC2=C1
14030	716	0.9185	FALSE	TRUE	TRUE	ACEGLUTAMIDE	nootropic	NCCO.CC(=O)N[C@@H](CCC(N)=O)C(O)=O
L1900	760	0.920378	FALSE	TRUE	TRUE	CYT387	CYT387 is an ATP-competitive inhibitor of JAK1/JAK2 with IC50 of 11 nM/18 nM, ~10-fold selectivity versus JAK3. Phase 1/2.	C1=C(C=CC(=C1)NC2=NC=CC(=N2)C3=CC=C(C=C3)C(NCC#N)=O)N4CCOCC4
LOPAC	738	0.920637	FALSE	TRUE	TRUE	Cephradine	Semisynthetic cephalosporin antibiotic; interferes with cell wall synthesis	CC1=C(N2[C@H](SC1)[C@H](NC(=O)C(N)C1=CCC=CC1)C2=O)C(O)=O
TM-L4	658	0.920923	FALSE	TRUE	TRUE	Lodoxamide	Lodoxamide is an antiallergic drug acting as a mast-cell stabilizer. It is effective in the treatment of asthma and allergic conjunctivitis.	OC(=O)C(=O)Nc1cc(cc(NC(=O)C(O)=O)c1Cl)C#N
L1900	716	0.923685	FALSE	TRUE	TRUE	Quisinostat (JNJ-26481585)	JNJ-26481585 is a novel second-generation HDAC inhibitor with highest potency for HDAC1 with IC50 of 0.11 nM, modest potent to HDACs 2, 4, 10, and 11; greater than 30-fold selectivity against HDACs 3, 5, 8, and 9 and lowest potency to HDACs 6 and 7. Phase 2.	C1=CC=C2C(=C1)C(=CN2C)CNCC3CCN(CC3)C4=NC=C(C=N4)C(=O)NO
TM-L4	764	0.927456	FALSE	TRUE	TRUE	Dinoprost Tromethamine	Dinoprost(Prostaglandin F2α) tromethamine salt is a naturally occurring prostaglandin used in medicine to induce labor and as an abortifacient.	NC(CO)(CO)CO.CCCCC[C@H](O)\C=C\[C@H]1[C@H](O)C[C@H](O)[C@@H]1C\C=C/CCCC(O)=O
LOPAC	774	0.927492	FALSE	TRUE	TRUE	CGS-15943	Highly potent, non-selective A1 adenosine receptor antagonist	NC1=NC2=CC=C(Cl)C=C2C2=NC(=NN12)C1=CC=CO1
14030	690	0.927682	FALSE	TRUE	TRUE	ROPINIROLE HYDROCHLORIDE	dopamine receptor agonist, antiParkinsonian	Cl.CCCN(CCC)CCC1=CC=CC2=C1CC(=O)N2
L1900	735	0.927852	FALSE	TRUE	TRUE	SHAM CONTROL	SHAM CONTROL	SHAM CONTROL
L2300	746	0.927852	FALSE	TRUE	TRUE	SHAM CONTROL	SHAM CONTROL	SHAM CONTROL
14030	818	0.928378	FALSE	TRUE	TRUE	GINKGOLIDE A	antibacterial	C[C@@H]1C(=O)OC2[C@H](O)C34[C@@H]5OC(=O)[C@@]3(O[C@@H]3OC(=O)[C@H](O)[C@]43[C@@H]([C@H]5O)C(C)(C)C)[C@@]12O
14030	698	0.930031	FALSE	TRUE	TRUE	PHENELZINE SULFATE	antidepressant	OS(O)(=O)=O.NNCCC1=CC=CC=C1
LOPAC	831	0.931881	FALSE	TRUE	TRUE	Enalaprilat dihydrate	Enalaprilat is an inhibitor of angiotensin converting enzyme (ACE), antihypertensive, and a Bradykinin B1 receptor activator. Enalaprilat has nM potency versus ACE and also activates B1 receptors to release NO.	C[C@H](N[C@@H](CCC1=CC=CC=C1)C(O)=O)C(=O)N1CCC[C@H]1C(O)=O
14030	848	0.93218	FALSE	TRUE	TRUE	PIROXICAM	antiinflammatory	CN1C(C(=O)NC2=CC=CC=N2)=C(O)C2=C(C=CC=C2)S1(=O)=O
14030	783	0.932735	FALSE	TRUE	TRUE	SPECTINOMYCIN HYDROCHLORIDE	antibacterial	Cl.Cl.CN[C@@H]1[C@H](O)[C@H](NC)[C@H]2O[C@]3(O)[C@@H](O[C@H](C)CC3=O)O[C@@H]2[C@H]1O
14030	742	0.933054	FALSE	TRUE	TRUE	PYRETHRINS	insecticide, Na channel toxin	CC(C)=C[C@@H]1[C@@H](C(=O)O[C@H]2CC(=O)C(C\C=C/C=C)=C2)C1(C)C
LOPAC	786	0.933914	FALSE	TRUE	TRUE	SB 205384	GABA-A receptor modulator selective for the alpha3beta2gamma2 subunit combination	CC#CCOC(=O)C1=C(N)C2=C(SC3=C2CCC(O)C3)N=C1C
L1200	761	0.935191	FALSE	TRUE	TRUE	Amuvatinib (MP-470)	Amuvatinib (MP-470) is a potent and multi-targeted inhibitor of c-Kit, PDGFRα and Flt3 with IC50 of 10 nM, 40 nM and 81 nM, respectively. Phase 2.	C1=CC=C2C(=C1)C3=C(O2)C(=NC=N3)N4CCN(CC4)C(=S)NCC5=CC=C6C(=C5)OCO6
14030	766	0.935799	FALSE	TRUE	TRUE	VINBLASTINE SULFATE	antineoplastic, spindle poison	OS(O)(=O)=O.CC[C@]1(O)CC2CN(C1)CCC1=C(NC3=CC=CC=C13)[C@@](C2)(C(=O)OC)C1=C(OC)C=C2N(C)[C@@H]3[C@]4(CCN5CC=C[C@](CC)([C@@H]45)[C@@H](OC(C)=O)[C@]3(O)C(=O)OC)C2=C1
14030	710	0.936151	FALSE	TRUE	TRUE	CONVALLATOXIN	cardiotonic	C[C@@H]1O[C@@H](O[C@H]2CC[C@]3(C=O)C4CC[C@]5(C)[C@H](CC[C@]5(O)C4CC[C@]3(O)C2)C2=CC(=O)OC2)[C@H](O)[C@H](O)[C@H]1O
LOPAC	697	0.93655	FALSE	TRUE	TRUE	1,3-Dipropyl-8-p-sulfophenylxanthine	Adenosine receptor antagonist with slight selectivity for A1 over A2	CCCN1C2=C(NC(=N2)C2=CC=C(C=C2)S(O)(=O)=O)C(=O)N(CCC)C1=O
14030	729	0.93679	FALSE	TRUE	TRUE	ASCORBYL PALMITATE	antioxidant	CCCCCCCCCCCCCCCC(=O)OCC(O)[C@H]1OC(=O)C(O)=C1O
L1900	754	0.939886	FALSE	TRUE	TRUE	SHAM CONTROL	SHAM CONTROL	SHAM CONTROL
14030	812	0.940776	FALSE	TRUE	TRUE	DABIGATRAN ETEXILATE MESYLATE	antithrombotic, serine protease inhibitor	CS(O)(=O)=O.CCCCCCOC(=O)\N=C(/N)C1=CC=C(NCC2=NC3=C(C=CC(=C3)C(=O)N(CCC(=O)OCC)C3=NC=CC=C3)N2C)C=C1
LOPAC	673	0.940852	FALSE	TRUE	TRUE	Cambinol	Sirtuin (Human Silent Information Regulator) Type 1/2 Inhibitor.	OC1=CC=C2C=CC=CC2=C1CC1=C(NC(=S)NC1=O)C1=CC=CC=C1
14030	690	0.941076	FALSE	TRUE	TRUE	CHLORTHALIDONE	diuretic, antihypertensive	NS(=O)(=O)C1=CC(=CC=C1Cl)C1(O)NC(=O)C2=C1C=CC=C2
TM-L4	845	0.941262	FALSE	TRUE	TRUE	Norepinephrine	Norepinephrine can stimulate apoptosis in adult rat ventricular myocytes by activation of the β-adrenergic pathway. It can up-regulate the expression of vascular endothelial growth factor, matrix metalloproteinase (MMP)-2, and MMP-9 in nasopharyngeal carcinoma tumour cells.	NC[C@H](O)c1ccc(O)c(O)c1
14030	742	0.942161	FALSE	TRUE	TRUE	TIMONACIC	hepatoprotectant	OC(=O)C1CSCN1
L1200	716	0.942301	FALSE	TRUE	TRUE	BMS-794833	BMS-794833 is a potent ATP competitive inhibitor of Met/VEGFR2 with IC50 of 1.7 nM/15 nM, also inhibits Ron, Axl and Flt3 with IC50 of <3 nM; a prodrug of BMS-817378. Phase 1.	N1=C(C(=C(C=C1)OC2=CC=C(C=C2F)NC(C3=CNC=C(C3=O)C4=CC=C(C=C4)F)=O)Cl)N
L2300	778	0.942479	FALSE	TRUE	TRUE	MDV3100 (Enzalutamide)	MDV3100 is an androgen-receptor (AR) antagonist with IC50 of 36 nM.	C1(=C(C=CC(=C1)N2C(N(C(C2(C)C)=O)C3=CC=C(C(=C3)C(F)(F)F)C#N)=S)C(NC)=O)F
14030	842	0.943638	FALSE	TRUE	TRUE	VERATRINE HYDROCHLORIDE	antihypertensive, antimicrobial, neurotoxin	Cl.C\C=C(\C)C(=O)O[C@H]1CC[C@@]2(C)[C@@H]3CC[C@H]4[C@]5(O)C[C@H](O)[C@@]6(O)[C@@H](CN7C[C@@H](C)CC[C@H]7[C@@]6(C)O)[C@]5(O)C[C@]24O[C@]13O
TM-L4	797	0.944298	FALSE	TRUE	TRUE	Atorvastatin Calcium	Atorvastatin hemicalcium salt, an effective HMG-CoA reductase inhibitor (IC50 = 8 nM), is utilized as a cholesterol-lowering medication.	[Ca++].CC(C)c1c(C(=O)Nc2ccccc2)c(c(-c2ccc(F)cc2)n1CC[C@@H](O)C[C@@H](O)CC([O-])=O)-c1ccccc1.CC(C)c1c(C(=O)Nc2ccccc2)c(c(-c2ccc(F)cc2)n1CC[C@@H](O)C[C@@H](O)CC([O-])=O)-c1ccccc1
14030	745	0.944828	FALSE	TRUE	TRUE	SODIUM PHENYLBUTYRATE	antihyperammonemic,antineoplastic	[Na+].[O-]C(=O)CCCC1=CC=CC=C1
TM-L4	774	0.946532	FALSE	TRUE	TRUE	Talazoparib	Talazoparib is a new-type PARP inhibitor (IC50: 0.58 nM), It similarly binds to PARP1/2 (Kis: 1.2/0.85 nM).	Cn1ncnc1[C@@H]1[C@H](N=c2cc(F)cc3C(=O)NNC1=c23)c1ccc(F)cc1
14030	890	0.947583	FALSE	TRUE	TRUE	DESIPRAMINE HYDROCHLORIDE	antidepressant	Cl.CNCCCN1C2=C(CCC3=C1C=CC=C3)C=CC=C2
L2300	738	0.947938	FALSE	TRUE	TRUE	SHAM CONTROL	SHAM CONTROL	SHAM CONTROL
14030	716	0.948586	FALSE	TRUE	TRUE	DEXAMETHASONE SODIUM PHOSPHATE	glucocorticoid, antiinflammatory	[Na+].[Na+].C[C@@H]1CC2C3CCC4=CC(=O)C=C[C@]4(C)[C@@]3(F)[C@@H](O)C[C@]2(C)[C@@]1(O)C(=O)COP([O-])([O-])=O
LOPAC	773	0.950124	FALSE	TRUE	TRUE	(±)-Isoproterenol hydrochloride	Sympathomimetic amine acting almost exclusively on beta adrenoceptors; bronchodilator	Cl.CC(C)NCC(O)C1=CC=C(O)C(O)=C1
14030	810	0.951033	FALSE	TRUE	TRUE	BOVINOCIDIN	antineoplastic	OC(=O)CC[N+]([O-])=O
14030	844	0.951411	FALSE	TRUE	TRUE	CLENBUTEROL HYDROCHLORIDE	bronchodilator, beta2 adrenergic agonist	Cl.CC(C)(C)NCC(O)C1=CC(Cl)=C(N)C(Cl)=C1
14030	591	0.952144	FALSE	TRUE	TRUE	PYRITHIONE ZINC	antibacterial, antifungal, antiseborrheic	S=C1CC=CC=[N]1O[Zn]ON1C=CC=CC1=S
TM-L4	864	0.95309	FALSE	TRUE	TRUE	Crisaborole	AN-2728 is a Phosphodiesterase 4 Inhibitor.	B1(C2=C(CO1)C=C(C=C2)OC3=CC=C(C=C3)C#N)O
14030	893	0.953257	FALSE	TRUE	TRUE	NORTRIPTYLINE HYDROCHLORIDE	antidepressant	Cl.CNCCC=C1C2=C(CCC3=C1C=CC=C3)C=CC=C2
L1200	799	0.953512	FALSE	TRUE	TRUE	WZ4002	WZ4002 is a novel, mutant-selective EGFR inhibitor for EGFR(L858R)/(T790M) with IC50 of 2 nM/8 nM; does not inhibit ERBB2 phosphorylation (T798I).	C1(=CC(=C(C=C1)NC2=NC=C(C(=N2)OC3=CC(=CC=C3)NC(C=C)=O)Cl)OC)N4CCN(CC4)C
14030	656	0.955499	FALSE	TRUE	TRUE	DOXEPIN HYDROCHLORIDE	antidepressant	Cl.CN(C)CC\C=C1\C2=C(COC3=C1C=CC=C3)C=CC=C2
14030	706	0.956887	FALSE	TRUE	TRUE	MECAMYLAMINE HYDROCHLORIDE	antihypertensive	Cl.CNC1(C)C2CCC(C2)C1(C)C
14030	875	0.957105	FALSE	TRUE	TRUE	CLOXACILLIN SODIUM	antibacterial	[Na+].CC1=C(C(=O)N[C@H]2[C@H]3SC(C)(C)[C@@H](N3C2=O)C([O-])=O)C(=NO1)C1=C(Cl)C=CC=C1
LOPAC	747	0.958075	FALSE	TRUE	TRUE	Calcimycin	Ca2+ ionophore used to potentiate responses to NMDA, but not quisqualate glutamate receptors	CNC1=C(C(O)=O)C2=C(OC(C[C@H]3O[C@@]4(CC[C@H]3C)O[C@H]([C@H](C)C(=O)C3=CC=CN3)[C@H](C)C[C@H]4C)=N2)C=C1
TM-L4	663	0.958325	FALSE	TRUE	TRUE	Cefamandole nafate	Cefamandole nafate is a second-generation broad-spectrum cephalosporin antibiotic.	[Na+].Cn1nnnc1SCC1=C(N2[C@H](SC1)[C@H](NC(=O)[C@H](OC=O)c1ccccc1)C2=O)C([O-])=O
14030	795	0.958736	FALSE	TRUE	TRUE	METHACYCLINE HYDROCHLORIDE	antibacterial	Cl.CN(C)[C@H]1[C@@H]2[C@@H](O)[C@@H]3C(=C)C4=CC=CC(O)=C4C(=O)C3=C(O)[C@]2(O)C(=O)C(C(N)=O)=C1O
14030	770	0.961161	FALSE	TRUE	TRUE	APHYLLIC ACID		OC(=O)C1CC(CN2CCCCC12)C1CCCCN1
TM-L4	793	0.961554	FALSE	TRUE	TRUE	Nicotine	Nicotine is the primary pharmacologic component of tobacco. It acts on nicotinic acetylcholine receptors (nAChRs) in the peripheral nervous system (autonomic ganglia and adrenal medulla neuromuscular junction) and the central nervous system (CNS).	CN1CCC[C@H]1C2=CN=CC=C2
14030	700	0.963235	FALSE	TRUE	TRUE	DIMENHYDRINATE	antiemetic	CN1C2=C(NC(Cl)=N2)C(=O)N(C)C1=O.CN(C)CCOC(C1=CC=CC=C1)C1=CC=CC=C1
14030	885	0.963317	FALSE	TRUE	TRUE	DEOXYGEDUNIN	neuroprotective, anti-depressant. learning enhancement	CC(=O)O[C@@H]1CC2C(C)(C)C(=O)C=C[C@]2(C)C2CC[C@@]3(C)[C@@H](OC(=O)C=C3[C@]12C)C1=COC=C1
14030	777	0.965423	FALSE	TRUE	TRUE	PROCODAZOLE	immune stimulant	OC(=O)CCC1=NC2=CC=CC=C2N1
14030	694	0.965958	FALSE	TRUE	TRUE	18-AMINOABIETA-8,11,13-TRIENE SULFATE		OS(O)(=O)=O.CC(C)C1=CC=C2C(CCC3[C@](C)(CN)CCC[C@]23C)=C1
TM-L4	748	0.966124	FALSE	TRUE	TRUE	Estradiol	Estradiol is an Estrogen. The mechanism of action of estradiol is as an Estrogen Receptor Agonist.	C[C@]12CC[C@H]3[C@H]([C@@H]1CC[C@@H]2O)CCC4=C3C=CC(=C4)O
14030	865	0.966917	FALSE	TRUE	TRUE	METHYLDOPA	antihypertensive	C[C@](N)(CC1=CC=C(O)C(O)=C1)C(O)=O
TM-L4	795	0.969372	FALSE	TRUE	TRUE	Erlotinib	Erlotinib is an EGFR inhibitor (IC50: 2 nM). It is used for the treatment of non-small cell lung cancer.	COCCOc1cc2ncnc(Nc3cccc(c3)C#C)c2cc1OCCOC
TM-L4	698	0.970544	FALSE	TRUE	TRUE	Bethanechol chloride	Bethanechol chloride is a slowly hydrolyzing muscarinic agonist with no nicotinic effects. Bethanechol is generally used to increase smooth muscle tone, as in the GI tract following abdominal surgery or in urinary retention in the absence of obstruction. It may cause hypotension, heart rate changes, and bronchial spasm.	[Cl-].O(C(C[N+](C)(C)C)C)C(=O)N
LOPAC	669	0.970799	FALSE	TRUE	TRUE	Opipramol dihydrochloride	sigma1, sigma2 receptor agonist; an antagonist at D2, 5HT2, and H1 receptors; atypical antidepressant, antipsychotic, and axiolytic.	Cl.Cl.OCCN1CCN(CCCN2C3=C(C=CC=C3)C=CC3=C2C=CC=C3)CC1
LOPAC	787	0.972323	FALSE	TRUE	TRUE	Brinzolamide	Brinzolamide is a carbonic anhydrase II inhibitor used to lower intraocular pressure.	CCN[C@H]1CN(CCCOC)S(=O)(=O)C2=C1C=C(S2)S(N)(=O)=O
L2300	804	0.974458	FALSE	TRUE	TRUE	U 73122		[C@@]12([C@]3([C@@]([C@H](NCCCCCCN4C(C=CC4=O)=O)CC3)(CC[C@@]1(C5=C(CC2)C=C(C=C5)OC)[H])C)[H])[H]
14030	839	0.975416	FALSE	TRUE	TRUE	FLECAINIDE ACETATE	antiarrhythmic, cardiac depressant	CC(O)=O.FC(F)(F)COC1=CC(C(=O)NCC2CCCCN2)=C(OCC(F)(F)F)C=C1
TM-L4	737	0.976693	FALSE	TRUE	TRUE	SHAM CONTROL	SHAM CONTROL	SHAM CONTROL
LOPAC	759	0.977695	FALSE	TRUE	TRUE	Gallamine triethiodide	M2 muscarinic acetylcholine receptor antagonist; muscle relaxant	[I-].[I-].[I-].CC[N+](CC)(CC)CCOC1=CC=CC(OCC[N+](CC)(CC)CC)=C1OCC[N+](CC)(CC)CC
TM-L4	826	0.979263	FALSE	TRUE	TRUE	Avatrombopag	Avatrombopag is a new oral thrombopoietin (TPO) receptor agonist, activating TPO receptor and increasing megakaryocytic proliferation/differentiation and platelet production.	O=C(Nc1nc(-c2cc(Cl)cs2)c(N2CCN(C3CCCCC3)CC2)s1)c1cnc(N2CCC(C(=O)O)CC2)c(Cl)c1
14030	829	0.979354	FALSE	TRUE	TRUE	PIRENPERONE	5HT2 receptor antagonist	CC1=C(CCN2CCC(CC2)C(=O)C2=CC=C(F)C=C2)C(=O)N2C=CC=CC2=N1
LOPAC	882	0.979969	FALSE	TRUE	TRUE	Quercetin dihydrate	Mitochondrial ATPase and phosphodiesterase (PDE) inhibitor; inhibits PI3-K activity	OC1=CC(O)=C2C(OC(=C(O)C2=O)C2=CC(O)=C(O)C=C2)=C1
L1900	761	0.980985	FALSE	TRUE	TRUE	Iniparib (BSI-201)	BSI-201 (Iniparib, SAR240550) is a PARP1 inhibitor with demonstrated effectiveness in triple-negative breast cancer (TNBC). Phase 3.	C1=CC(=C(C=C1C(N)=O)[N+](=O)[O-])I
14030	671	0.982271	FALSE	TRUE	TRUE	LITHIUM CITRATE	antidepressant	[Li+].[Li+].[Li+].OC(CC([O-])=O)(CC([O-])=O)C([O-])=O
TM-L4	764	0.983041	FALSE	TRUE	TRUE	SHAM CONTROL	SHAM CONTROL	SHAM CONTROL
L2300	700	0.983557	FALSE	TRUE	TRUE	SHAM CONTROL	SHAM CONTROL	SHAM CONTROL
TM-L4	655	0.986217	FALSE	TRUE	TRUE	Fluocinolone acetonide	Fluocinolone acetonide is a glucocorticoid derivative used topically in the treatment of various skin disorders. It is usually employed as a cream, gel, lotion, or ointment. It has also been used topically in the treatment of inflammatory eye, ear, and nose disorders.	F[C@]12[C@H]([C@H]3[C@@]([C@@]4(OC(O[C@@H]4C3)(C)C)C(=O)CO)(C[C@@H]2O)C)C[C@H](F)C2=CC(=O)C=C[C@]12C
14030	950	0.986347	FALSE	TRUE	TRUE	SEMUSTINE	antineoplastic	CC1CCC(CC1)NC(=O)N(CCCl)N=O
L2300	820	0.986427	FALSE	TRUE	TRUE	Lonidamine	Lonidamine is an orally administered small molecule hexokinase inactivator with an IC50 of 0.85 mM.	C1=CC=C2C(=C1)N(N=C2C(O)=O)CC3=C(C=C(C=C3)Cl)Cl
LOPAC	763	0.986596	FALSE	TRUE	TRUE	Chloroquine diphosphate	Antimalarial; anti-amoebic; anti-inflammatory; binds strongly to double-stranded DNA	OP(O)(O)=O.OP(O)(O)=O.CCN(CC)CCCC(C)NC1=CC=NC2=C1C=CC(Cl)=C2
14030	838	0.98792	FALSE	TRUE	TRUE	ISOLIQUIRITIGENIN	aldose reductase inhibitor, antineoplastic, antiinflammatory	OC1=CC=C(\C=C\C(=O)C2=C(O)C=C(O)C=C2)C=C1
L1200	881	0.988609	FALSE	TRUE	TRUE	MK-8776 (SCH 900776)	SCH 900776 is a selective Chk1 inhibitor with IC50 of 3 nM. It shows 500-fold selectivity against Chk2. Phase 2.	C12N=C(C(=C(N1N=CC=2C3=CN(N=C3)C)N)Br)[C@H]4CNCCC4
L2300	713	0.988642	FALSE	TRUE	TRUE	Hypoxia Inducible Factor-1α Inhibitor		C(C1C=C(C(=CC=1)O)NC(COC2C=CC(=CC=2)C34CC5CC(C3)CC(C5)C4)=O)(=O)OC
TM-L4	934	0.990545	FALSE	TRUE	TRUE	LY2835219	LY2835219 is a specific and effective inhibitor of CDK4(IC50=2 nM) and CDK6(IC50=10 nM).	CCN1CCN(Cc2ccc(Nc3nc(c4cc(F)c5nc(C)n(C(C)C)c5c4)c(F)cn3)nc2)CC1.CS(=O)(=O)O
TM-L4	710	0.990954	FALSE	TRUE	TRUE	Tenofovir	Tenofovir is an adenine analog REVERSE TRANSCRIPTASE INHIBITOR with antiviral activity against HIV-1 and HEPATITIS B. It is used to treat HIV INFECTIONS and CHRONIC HEPATITIS B, in combination with other ANTIVIRAL AGENTS, due to the emergence of ANTIVIRAL DRUG RESISTANCE when it is used alone.	n1(c2c(nc1)c(ncn2)N)C[C@H](OCP(=O)(O)O)C
L1900	763	0.991408	FALSE	TRUE	TRUE	SHAM CONTROL	SHAM CONTROL	SHAM CONTROL
TM-L4	659	0.991818	FALSE	TRUE	TRUE	Conivaptan hydrochloride	Conivaptan HCl is an orally active vasopressin V2 and V1A receptor antagonist, used in the therapy of hypervolemic hyponatremia and euvolemic.	Cl.Cc1nc-2c(CCN(C(=O)c3ccc(NC(=O)c4ccccc4-c4ccccc4)cc3)c3ccccc-23)[nH]1
14030	801	0.994259	FALSE	TRUE	TRUE	XYLOMETAZOLINE HYDROCHLORIDE	adrenergic agonist, nasal decongestant	Cl.CC1=CC(=CC(C)=C1CC1=NCCN1)C(C)(C)C
L2300	633	0.994626	FALSE	TRUE	TRUE	AZD6244 (Selumetinib)	AZD6244 (Selumetinib, ARRY-142886) is highly potent to inhibit MEK1 with IC50 of 14 nM.	C1=C2C(=C(C(=C1C(NOCCO)=O)NC3=CC=C(C=C3Cl)Br)F)N=CN2C
TM-L4	763	0.99592	FALSE	TRUE	TRUE	histidine	Histidine is a semi-essential amino acid (children should obtain it from food) needed in humans for growth and tissue repair, Histidine is important for maintenance of myelin sheaths that protect nerve cells and is metabolized to the neurotransmitter histamine. Histamines play many roles in immunity, gastric secretion, and sexual functions. Histidine is also required for blood cell manufacture an…	N[C@@H](Cc1c[nH]cn1)C(O)=O
14030	818	0.996115	FALSE	TRUE	TRUE	SELENOMETHIONINE	contrast agent	NCCO.C[Se]CC[C@H](N)C(O)=O
LOPAC	837	0.996414	FALSE	TRUE	TRUE	Methylergonovine maleate	Dopamine antagonist; ergot alkaloid which interacts with serotonergic, dopaminergic and alpha-adrenergic systems	OC(=O)\C=C/C(O)=O.CC[C@@H](CO)NC(=O)[C@H]1CN(C)[C@@H]2CC3=CNC4=C3C(=CC=C4)C2=C1
LOPAC	725	0.996535	FALSE	TRUE	TRUE	Rolipram	Selective cAMP-dependent phosphodiesterase (Type IV) cAMP-dependent inhibitor	COC1=C(OC2CCCC2)C=C(C=C1)C1CNC(=O)C1
14030	906	0.996823	FALSE	TRUE	TRUE	AZATHIOPRINE	immunosuppressant, antineoplastic, antirheumatic	CN1C=NC(=C1SC1=C2N=CN=C2N=CN1)[N+]([O-])=O
L1200	629	0.996871	FALSE	TRUE	TRUE	MGCD-265	MGCD-265 is a potent, multi-target and ATP-competitive inhibitor of c-Met and VEGFR1/2/3 with IC50 of 1 nM, 3 nM/3 nM/4 nM, respectively; also inhibits Ron and Tie2. Phase 1/2.	C1(=CC=CC=C1)CC(NC(NC2=CC=C(C(=C2)F)OC3=C4C(=NC=C3)C=C(S4)C5N=CN(C=5)C)=S)=O
14030	670	0.997597	FALSE	TRUE	TRUE	BETAINE HYDROCHLORIDE	antiarteriosclerotic, hypolipaemic, hepatoprotectant	Cl.C[N+](C)(C)CC([O-])=O
14030	702	0.997627	FALSE	TRUE	TRUE	TOLAZAMIDE	antidiabetic	CC1=CC=C(C=C1)S(=O)(=O)NC(=O)NN1CCCCCC1
14030	781	0.998654	FALSE	TRUE	TRUE	MEVALONIC ACID LACTONE		CC1(O)CCOC(=O)C1
LOPAC	751	0.998688	FALSE	TRUE	TRUE	CP-64434 hydrate	CP-064434 is an antibiotic; anti-proliferative HDAC inhibitor.	O.CC[C@H]1OC(=O)[C@H](C)[C@@H](O[C@H]2C[C@@](C)(OC)[C@@H](O)[C@H](C)O2)[C@H](C)[C@@H](O[C@@H]2O[C@H](C)C[C@H](NC)[C@H]2O)[C@](C)(O)C[C@@H](C)CN(C)[C@H](C)[C@@H](O)[C@]1(C)O
TM-L4	781	0.99965	FALSE	TRUE	TRUE	Ampicillin sodium	Ampicillin Sodium is the sodium salt form of ampicillin, a broad-spectrum semisynthetic derivative of aminopenicillin. Ampicillin sodium inhibits bacterial cell wall synthesis by binding to penicillin binding proteins, thereby inhibiting peptidoglycan synthesis, a critical component of the bacterial cell wall.	[Na+].CC1(C)S[C@@H]2[C@H](NC(=O)[C@H](N)c3ccccc3)C(=O)N2[C@H]1C([O-])=O
TM-L4	771	1.00048	FALSE	TRUE	TRUE	Amlexanox	Amlexanox is an anti-aphthous ulcer drug. Amlexanox inhibits the synthesis and release of inflammatory mediators, including leukotrienes and histamine, from mast cells, neutrophils, and mononuclear cells. Amlexanox also acts as a leukotriene D4 antagonist and a phosphodiesterase inhibitor. Amlexanox decreases the time ulcers take to heal as well as the pain associated with the ulcers.	CC(C)c1cc2c(oc3nc(N)c(cc3c2=O)C(=O)O)cc1
14030	754	1.00051	FALSE	TRUE	TRUE	URSODIOL	anticholelithogenic; LD50(rat) 890 mg/kg ip	C[C@H](CCC(O)=O)[C@H]1CCC2C3[C@@H](O)C[C@@H]4C[C@H](O)CC[C@]4(C)C3CC[C@]12C
14030	784	1.00104	FALSE	TRUE	TRUE	VALINE (L)	amino acid, nutrient	CC(C)[C@H](N)C(O)=O
14030	880	1.00167	FALSE	TRUE	TRUE	MERCAPTOPURINE	antineoplastic, purine antimetabolite	S=C1NC=NC2=C1NC=N2
TM-L4	768	1.00397	FALSE	TRUE	TRUE	SHAM CONTROL	SHAM CONTROL	SHAM CONTROL
TM-L4	773	1.00397	FALSE	TRUE	TRUE	SHAM CONTROL	SHAM CONTROL	SHAM CONTROL
14030	738	1.00662	FALSE	TRUE	TRUE	ALISKIREN HEMIFUMARATE	renin inhibitor	OC(=O)\C=C\C(O)=O.COCCCOC1=C(OC)C=CC(C[C@@H](C[C@H](N)[C@@H](O)C[C@@H](C(C)C)C(=O)NCC(C)(C)C(N)=O)C(C)C)=C1
TM-L4	723	1.00785	FALSE	TRUE	TRUE	Rivastigmine	Rivastigmine is a Cholinesterase Inhibitor, used for therapy of Alzheimer disease.	C(=O)(N(C)CC)Oc1cc(ccc1)[C@H](C)N(C)C
14030	749	1.00794	FALSE	TRUE	TRUE	ENTACAPONE	antidyskinetic	CCN(CC)C(=O)C(=C\C1=CC(O)=C(O)C(=C1)[N+]([O-])=O)\C#N
TM-L4	738	1.00818	FALSE	TRUE	TRUE	Dienogest	Dienogest is an orally-active, semisynthetic, fourth generation, nonethinylated progestogen with antiproliferative, antiandrogenic, anti-inflammatory and antiangiogenic activities that is used in hormone therapy and as a female contraceptive.	O=C1C=C2C(=C3[C@@H](CC2)[C@H]2[C@](CC3)([C@@](CC2)(CC#N)O)C)CC1
14030	786	1.00834	FALSE	TRUE	TRUE	FLUFENAMIC ACID	antiinflammatory, analgesic	OC(=O)C1=CC=CC=C1NC1=CC=CC(=C1)C(F)(F)F
pfizer	689	1.00853	FALSE	TRUE	TRUE	CP-380736	Tyrosine Kinase	COCCOC1=CC2=C(C=C1OCCOC)C(=O)NC=N2
TM-L4	778	1.00865	FALSE	TRUE	TRUE	Delavirdine (mesylate)	Delavirdine (mesylate) is a non-nucleoside reverse transcriptase inhibitor (NNRTI).	CS(O)(=O)=O.CC(C)Nc1cccnc1N1CCN(CC1)C(=O)c1cc2cc(NS(C)(=O)=O)ccc2[nH]1
LOPAC	758	1.00875	FALSE	TRUE	TRUE	Zonisamide sodium	Antiepileptic; effective in various animal epilepsy models and in humans with both partial and generalized epileptic seizures	[Na+].[O-]S(=N)(=O)CC1=NOC2=CC=CC=C12
14030	772	1.00965	FALSE	TRUE	TRUE	DEFLAZACORT	antiinflammatory	CC(=O)OCC(=O)[C@@]12N=C(C)O[C@@H]1CC1C3CCC4=CC(=O)C=C[C@]4(C)C3[C@@H](O)C[C@]21C
14030	844	1.00998	FALSE	TRUE	TRUE	TANSHINONE IIA	antineoplastic, bone resorption inhibitor, antiproliferative, apoptosis inducer	CC1=COC2=C1C(=O)C(=O)C1=C2C=CC2=C1CCCC2(C)C
14030	795	1.01167	FALSE	TRUE	TRUE	CHLORAMINE-T	antiseptic, disinfectant, antiproliferative	[Na+].CC1=CC=C(C=C1)S(=O)(=O)[N-]Cl
LOPAC	767	1.01175	FALSE	TRUE	TRUE	Acetamide	Carbonic anhydrase inhibitor	CC(N)=O
TM-L4	690	1.01205	FALSE	TRUE	TRUE	Cefotetan	Cefotetan Sodium (ICI-156834, YM-09330) is a second-generation cephalosporin, cephamycin antibiotic that is active against a wide range of both aerobic and anaerobic gram-positive and gram-negative bacteria. Cefotetan binds to penicillin-binding proteins and disrupts the cell wall synthesis.	CO[C@]1(NC(=O)C2S\C(S2)=C(/C(N)=O)C(O)=O)[C@H]2SCC(CSc3nnnn3C)=C(N2C1=O)C(O)=O
14030	714	1.01291	FALSE	TRUE	TRUE	AMITRIPTYLINE HYDROCHLORIDE	antidepressant	Cl.CN(C)CCC=C1C2=C(CCC3=C1C=CC=C3)C=CC=C2
14030	819	1.01491	FALSE	TRUE	TRUE	CHLORMEZANONE	anxiolytic, muscle relaxant	CN1C(C2=CC=C(Cl)C=C2)S(=O)(=O)CCC1=O
TM-L4	842	1.01589	FALSE	TRUE	TRUE	Olodaterol	Olodaterol is a novel, long-acting beta2-adrenergic agonist (LABA) that exerts its pharmacological effect by binding and activating beta2-adrenergic receptors located primarily in the lungs.	O1CC(=O)Nc2c1c(cc(c2)O)[C@H](CNC(Cc1ccc(cc1)OC)(C)C)O
L2300	765	1.01778	FALSE	TRUE	TRUE	Capecitabine (Xeloda)	Capecitabine is a tumor-selective fluoropyrimidine carbamate which achieves higher intratumoral 5-FU level with lower toxicity than 5-FU.	N1=C(C(=CN(C1=O)[C@@H]2O[C@@H]([C@H]([C@@H]2O)O)C)F)NC(OCCCCC)=O
14030	734	1.01831	FALSE	TRUE	TRUE	NATAMYCIN	antibacterial	NCCO.C[C@H]1O[C@@H](OC2CC3OC(O)(CC(O)C3C(O)=O)CC(O)CC3OC3\C=C\C(=O)OC(C)C\C=C\C=C\C=C\C=C\2)[C@@H](O)[C@@H](N)[C@@H]1O
L1200	779	1.01836	FALSE	TRUE	TRUE	3-Methyladenine	3-Methyladenine is a selective PI3K inhibitor for Vps34 and PI3Kγ with IC50 of 25 μM and 60 μM; blocks class I PI3K consistently, whereas suppression of class III PI3K is transient, and also blocks autophagosome formation.	N1=CN=C2N(C=NC(=C12)N)C
14030	882	1.01978	FALSE	TRUE	TRUE	DESOXYCORTICOSTERONE ACETATE	mineralocorticoid	CC(=O)OCC(=O)[C@H]1CCC2C3CCC4=CC(=O)CC[C@]4(C)C3CC[C@]12C
LOPAC	678	1.02105	FALSE	TRUE	TRUE	Imazodan	Selective phosphodiesterase II (PDEII) inhibitor	O=C1CCC(=NN1)C1=CC=C(C=C1)N1C=CN=C1
L1200	826	1.02152	FALSE	TRUE	TRUE	RKI-1447	RKI-1447 is a potent inhibitor of ROCK1 and ROCK2, with IC50 of 14.5 nM and 6.2 nM, respectively, has anti-invasive and antitumor activities.	C1=NC=CC(=C1)C2N=C(SC=2)NC(NCC3=CC=CC(=C3)O)=O
L1900	787	1.02175	FALSE	TRUE	TRUE	SHAM CONTROL	SHAM CONTROL	SHAM CONTROL
14030	657	1.022	FALSE	TRUE	TRUE	ETHYLENEDIAMINE TETRACETATE TETRA-ETHANOLAMINE	chelating agent, antioxidant	NCCO.NCCO.NCCO.NCCO.OC(=O)CN(CCN(CC(O)=O)CC(O)=O)CC(O)=O
LOPAC	744	1.0226	FALSE	TRUE	TRUE	Chlorpropamide	Stimulates insulin release	CCCNC(=O)NS(=O)(=O)C1=CC=C(Cl)C=C1
14030	742	1.02273	FALSE	TRUE	TRUE	ARTESUNATE	antimalarial	C[C@@H]1CC[C@H]2[C@@H](C)[C@H](OC(=O)CCC(O)=O)O[C@@H]3O[C@]4(C)CC[C@@H]1[C@@]23OO4
TM-L4	684	1.02321	FALSE	TRUE	TRUE	Repaglinide	Repaglinide is a benzoic acid derivative that stimulates insulin secretion from the pancreas and is used in the therapy of type 2 diabetes. Repaglinide has been linked to rare instances of clinically apparent acute liver injury.	c1ccc(c(c1)[C@@H](NC(=O)Cc1cc(c(cc1)C(=O)O)OCC)CC(C)C)N1CCCCC1
TM-L4	740	1.02377	FALSE	TRUE	TRUE	Mecamylamine hydrochloride	Mecamylamine hydrochloride is a nicotinic antagonist, used as a ganglionic blocker in hypertension.	Cl.CNC1(C)C2CCC(C2)C1(C)C
14030	882	1.02415	FALSE	TRUE	TRUE	DEFEROXAMINE MESYLATE	chelating agent (Fe & Al)	CS(O)(=O)=O.CC(=O)N(O)CCCCCNC(=O)CCC(=O)N(O)CCCCCNC(=O)CCC(=O)N(O)CCCCCN
pfizer	612	1.02636	FALSE	TRUE	TRUE	Pactamycin	Antibiotic	C[C@H](O)[C@]1(NC(=O)N(C)C)[C@@H](N)[C@H](NC2=CC=CC(=C2)C(C)=O)[C@](O)(COC(=O)C2=C(C)C=CC=C2O)[C@]1(C)O
LOPAC	776	1.02651	FALSE	TRUE	TRUE	Auranofin	Inhibits the release of inflammatory mediators from human macrophages, basophils, and pulmonary mast cells. Inhibits 5-lipoxygenase in human neutrophils. Is a potent inhibitor of selenoenzyme thioredoxin reductase (TrxR). Auranofin inhibits IKB kinase (IKK) by modifying Cys-179 of the IKK§ subunit 5.	CCP(CC)(CC)=[Au]S[C@@H]1O[C@H](COC(C)=O)[C@@H](OC(C)=O)[C@H](OC(C)=O)[C@H]1OC(C)=O
14030	708	1.0266	FALSE	TRUE	TRUE	COTININE	antidepressant	CN1[C@@H](CCC1=O)C1=CN=CC=C1
14030	723	1.02803	FALSE	TRUE	TRUE	NALBUPHINE HYDROCHLORIDE	analgesic, narcotic antagonist	Cl.O[C@H]1CC[C@@]2(O)[C@H]3CC4=C5C(OC1[C@@]25CCN3CC1CCC1)=C(O)C=C4
LOPAC	729	1.02847	FALSE	TRUE	TRUE	Budesonide	Anti-inflammatory glucocorticoid	CCCC1O[C@@H]2C[C@H]3[C@@H]4CCC5=CC(=O)C=C[C@]5(C)[C@H]4[C@@H](O)C[C@]3(C)[C@@]2(O1)C(=O)CO
TM-L4	825	1.02861	FALSE	TRUE	TRUE	Acamprosate calcium	Acamprosate calcium is a GABA receptor agonist and modulator of glutamatergic systems, used for treating alcohol dependence.	[Ca+2].CC(=O)NCCCS(=O)(=O)[O-].CC(=O)NCCCS(=O)(=O)[O-]
14030	780	1.02979	FALSE	TRUE	TRUE	ATRACURIUM BESYLATE	neuromuscular blocker	[O-]S(=O)(=O)C1=CC=CC=C1.[O-]S(=O)(=O)C1=CC=CC=C1.COC1=CC2=C(C=C1OC)C(CC1=CC(OC)=C(OC)C=C1)[N+](C)(CCC(=O)OCCCCCOC(=O)CC[N+]1(C)CCC3=C(C=C(OC)C(OC)=C3)C1CC1=CC(OC)=C(OC)C=C1)CC2
14030	778	1.03051	FALSE	TRUE	TRUE	EVERNINIC ACID		COC1=CC(C)=C(C(O)=O)C(O)=C1
L1200	818	1.03099	FALSE	TRUE	TRUE	AC480 (BMS-599626)	AC480 (BMS-599626) is a selective and efficacious inhibitor of HER1 and HER2 with IC50 of 20 nM and 30 nM, ~8-fold less potent to HER4, >100-fold to VEGFR2, c-Kit, Lck, MET etc. Phase 1.	C1(CN[C@@H](CO1)COC(NC2=CN3C(=C2C)C(=NC=N3)NC4=CC5=C(C=C4)N(N=C5)CC6=CC(=CC=C6)F)=O).Cl
L2300	724	1.03174	FALSE	TRUE	TRUE	SHAM CONTROL	SHAM CONTROL	SHAM CONTROL
14030	752	1.03176	FALSE	TRUE	TRUE	CYCLOPENTOLATE HYDROCHLORIDE	mydriatic	Cl.CN(C)CCOC(=O)C(C1=CC=CC=C1)C1(O)CCCC1
TM-L4	740	1.03224	FALSE	TRUE	TRUE	Plerixafor	Plerixafor, a chemokine receptor antagonist, blocks the binding of stromal cell-derived factor (SDF-1alpha) to the cellular receptor CXCR4.	C(N1CCCNCCNCCCNCC1)c1ccc(CN2CCCNCCNCCCNCC2)cc1
TM-L4	801	1.03261	FALSE	TRUE	TRUE	Guanfacine hydrochloride	Guanfacine hydrochloride is a centrally acting antihypertensive agent with specificity towards ADRENERGIC ALPHA-2 RECEPTORS.	Cl.NC(=N)NC(=O)Cc1c(Cl)cccc1Cl
14030	757	1.03267	FALSE	TRUE	TRUE	SPAGLUMIC ACID	neurotransmitter; mGluR3 receptors	CC(=O)N[C@@H](CC(O)=O)C(=O)N[C@@H](CCC(O)=O)C(O)=O
LOPAC	736	1.03372	FALSE	TRUE	TRUE	Citalopram hydrobromide	Selective serotonin reuptake inhibitor	Br.CN(C)CCCC1(OCC2=CC(=CC=C12)C#N)C1=CC=C(F)C=C1
14030	787	1.03439	FALSE	TRUE	TRUE	ANTAZOLINE	antihistaminic	C(N(CC1=CC=CC=C1)C1=CC=CC=C1)C1=NCCN1
TM-L4	713	1.03528	FALSE	TRUE	TRUE	Cefadroxil	Cefadroxil is a Cephalosporin Antibacterial. The chemical classification of cefadroxil anhydrous is Cephalosporins.	CC1=C(N2[C@H](SC1)[C@H](NC(=O)[C@H](N)c1ccc(O)cc1)C2=O)C(=O)O
LOPAC	786	1.03568	FALSE	TRUE	TRUE	Granisetron hydrochloride	serotonin 5-HT3 receptor antagonist and antiemetic	Cl.CN1N=C(C(=O)NC2CC3CCCC(C2)N3C)C2=C1C=CC=C2
14030	759	1.03571	FALSE	TRUE	TRUE	CLORGILINE HYDROCHLORIDE	MAO-A inhibitor, antidepressant, antiparkinsonian	Cl.CN(CCCOC1=C(Cl)C=C(Cl)C=C1)CC#C
14030	633	1.03589	FALSE	TRUE	TRUE	CEFOTAXIME SODIUM	antibacterial	[Na+].CO\N=C(\C(=O)N[C@H]1[C@H]2SCC(COC(C)=O)=C(N2C1=O)C([O-])=O)C1=CSC(N)=N1
14030	762	1.03589	FALSE	TRUE	TRUE	ACIPIMOX	antilipemic	CC1=CN=C(C=[N+]1[O-])C(O)=O
14030	800	1.0361	FALSE	TRUE	TRUE	CHLORTHALIDONE	diuretic, antihypertensive	NS(=O)(=O)C1=CC(=CC=C1Cl)C1(O)NC(=O)C2=C1C=CC=C2
14030	726	1.03679	FALSE	TRUE	TRUE	3,7-DIHYDROXYFLAVONE		OC1=CC=C2C(OC(=C(O)C2=O)C2=CC=CC=C2)=C1
14030	860	1.03736	FALSE	TRUE	TRUE	ROTENONE	acaricide, ectoparasiticide, antineoplastic, mitochondrial poison	COC1=C(OC)C=C2[C@H]3[C@@H](COC2=C1)OC1=C(C=CC2=C1C[C@@H](O2)C(C)=C)C3=O
LOPAC	786	1.03791	FALSE	TRUE	TRUE	ANA-12	ANA-12 is a TrkB ligand that prevents activation of the receptor by BDNF with a high potency	O=C(NC1=CC=CC=C1C(=O)NC1CCCCNC1=O)C1=CC2=C(S1)C=CC=C2
L2300	636	1.03836	FALSE	TRUE	TRUE	Fluvastatin sodium (Lescol)	Fluvastatin is a HMG-CoA reductase inhibitor used to treat hypercholesterolemia.	C12=C(C=CC=C1)N(C(=C2C3=CC=C(C=C3)F)/C=C/[C@H](C[C@H](CC(O[Na])=O)O)O)C(C)C
14030	734	1.03912	FALSE	TRUE	TRUE	MERBROMIN	antibacterial	[Na+].[Na+].O[Hg]C1=C([O-])C(Br)=CC2=C1OC1=CC(=O)C(Br)=CC1=C2C1=CC=CC=C1C([O-])=O
14030	713	1.03992	FALSE	TRUE	TRUE	DESOXYCORTICOSTERONE ACETATE	mineralocorticoid	CC(=O)OCC(=O)[C@H]1CCC2C3CCC4=CC(=O)CC[C@]4(C)C3CC[C@]12C
LOPAC	720	1.03997	FALSE	TRUE	TRUE	ATPA	Selective kainate glutamate receptor agonist	CC(C)(C)C1=C(CC([NH3+])C([O-])=O)C(O)=NO1
TM-L4	702	1.0404	FALSE	TRUE	TRUE	Naloxone hydrochloride	Naloxone hydrochloride is a specific opiate antagonist that has no agonist activity. It is a competitive antagonist at mu, delta, and kappa opioid receptors.	C=CCN1CC[C@]23[C@@H]4C(=O)CC[C@]2([C@H]1Cc1c3c(c(cc1)O)O4)O.Cl
L1200	827	1.04091	FALSE	TRUE	TRUE	AG-490 (Tyrphostin B42)	AG-490 (Tyrphostin B42) is an inhibitor of EGFR with IC50 of 0.1 μM, 135-fold more selective for EGFR versus ErbB2, also inhibits JAK2 with no activity to Lck, Lyn, Btk, Syk and Src.	C1(=C(C=CC(=C1)/C=C(/C(NCC2=CC=CC=C2)=O)C#N)O)O
14030	916	1.04133	FALSE	TRUE	TRUE	DEXTROMETHORPHAN HYDROBROMIDE	antitussive	Br.COC1=CC=C2C[C@H]3[C@H]4CCCC[C@@]4(CCN3C)C2=C1
L2300	788	1.0415	FALSE	TRUE	TRUE	SHAM CONTROL	SHAM CONTROL	SHAM CONTROL
L1900	772	1.04171	FALSE	TRUE	TRUE	PCI-34051	PCI-34051 is a potent and specific HDAC8 inhibitor with IC50 of 10 nM. It has greater than 200-fold selectivity over HDAC1 and 6, more than 1000-fold selectivity over HDAC2, 3, and 10.	N1(C=CC2C=CC(=CC1=2)C(=O)NO)CC3C=CC(=CC=3)OC
14030	945	1.04266	FALSE	TRUE	TRUE	METAPROTERENOL	bronchodilator	CC(C)NCC(O)C1=CC(O)=CC(O)=C1
TM-L4	784	1.04289	FALSE	TRUE	TRUE	Valdecoxib	Valdecoxib is a prescription drug used in the treatment of osteoarthritis, rheumatoid arthritis, and painful menstruation and menstrual symptoms. It is classified as a nonsteroidal anti-inflammatory drug, or NSAID, and should not be taken by anyone allergic to these types of medications.	Cc1c(c(no1)c1ccccc1)c1ccc(cc1)S(=O)(=O)N
14030	749	1.04309	FALSE	TRUE	TRUE	BENOXINATE HYDROCHLORIDE	anesthetic (local)	Cl.CCCCOC1=CC(=CC=C1N)C(=O)OCCN(CC)CC
LOPAC	732	1.0436	FALSE	TRUE	TRUE	Cyclobenzaprine hydrochloride	5-HT2 serotonin receptor antagonist	Cl.CN(C)CCC=C1C2=CC=CC=C2C=CC2=C1C=CC=C2
TM-L4	710	1.04508	FALSE	TRUE	TRUE	Cariprazine	Cariprazine is a novel antipsychotic drug candidate that exhibits high affinity for the D3 (Ki=0.085 nM) and D2 (Ki=0.49 nM) receptors, and moderate affinity for the 5-HT1A receptor (Ki=2.6 nM).	CN(C)C(=O)N[C@H]1CC[C@H](CCN2CCN(CC2)c2cccc(Cl)c2Cl)CC1
L1200	786	1.04567	FALSE	TRUE	TRUE	AT7519	AT7519 is a multi-CDK inhibitor for CDK1, 2, 4, 6 and 9 with IC50 of 10-210 nM. It is less potent to CDK3 and little active to CDK7. Phase 1.	C1=C(C(=C(C=C1)Cl)C(NC2=CNN=C2C(=O)NC3CCNCC3)=O)Cl
14030	844	1.04576	FALSE	TRUE	TRUE	BROXYQUINOLINE	antiinfectant, disinfectant	OC1=C(Br)C=C(Br)C2=CC=CN=C12
14030	784	1.04609	FALSE	TRUE	TRUE	HALOTHANE	anesthetic	FC(F)(F)C(Cl)Br
LOPAC	743	1.04719	FALSE	TRUE	TRUE	SB 206553 hydrochloride	Potent 5-HT2C/5-HT2B serotonin receptor antagonist	Cl.CN1C=CC2=C1C=C1CCN(C(=O)NC3=CC=CN=C3)C1=C2
LOPAC	641	1.04768	FALSE	TRUE	TRUE	L-3,4-Dihydroxyphenylalanine methyl ester hydrochloride	Precursor to L-DOPA that crosses the blood-brain barrier	Cl.COC(=O)[C@@H](N)CC1=CC(O)=C(O)C=C1
LOPAC	702	1.04821	FALSE	TRUE	TRUE	5-Hydroxyindolacetic acid	Serotonin metabolite	OC(=O)CC1=CNC2=C1C=C(O)C=C2
TM-L4	1008	1.04831	FALSE	TRUE	TRUE	Abemaciclib	LY2835219 is an effective and specific CDK4/6 inhibitor (IC50: 2/10 nM).	CC(n1c2cc(c3nc(Nc4ncc(CN5CCN(CC)CC5)cc4)ncc3F)cc(F)c2nc1C)C
LOPAC	592	1.04871	FALSE	TRUE	TRUE	Iofetamine hydrochloride	Reference standard; radio-iodinated iofetamine is used to image brain blood flow	Cl.CC(C)NC(C)CC1=CC=C(I)C=C1
LOPAC	728	1.05075	FALSE	TRUE	TRUE	Carbamazepine	Analgesic; anticonvulsant	NC(=O)N1C2=C(C=CC=C2)C=CC2=C1C=CC=C2
TM-L4	686	1.0517	FALSE	TRUE	TRUE	Lesinurad	Lesinurad is a selective inhibitor of uric acid reabsorption which is used in combination with other agents in the therapy of gout. Lesinurad has had a limited clinical use but has not been associated with serum enzyme elevations during therapy or with instances of clinically apparent liver injury.	OC(=O)CSc1nnc(Br)n1-c1ccc(C2CC2)c2ccccc12
14030	826	1.05203	FALSE	TRUE	TRUE	DIFLUNISAL	analgesic, antiinflammatory	OC(=O)C1=C(O)C=CC(=C1)C1=CC=C(F)C=C1F
14030	681	1.05228	FALSE	TRUE	TRUE	DEFEROXAMINE MESYLATE	chelating agent (Fe & Al)	CS(O)(=O)=O.CC(=O)N(O)CCCCCNC(=O)CCC(=O)N(O)CCCCCNC(=O)CCC(=O)N(O)CCCCCN
14030	780	1.0532	FALSE	TRUE	TRUE	NICORANDIL	vasodilator	[O-][N+](=O)OCCNC(=O)C1=CC=CN=C1
TM-L4	559	1.05363	FALSE	TRUE	TRUE	Tannic acid	Tannic acid is a novel hERG channel blocker.	C1=C(C=C(C(=C1O)O)O)C(=O)OC2=CC(=CC(=C2O)O)C(=O)OC[C@@H]3[C@H]([C@@H]([C@H]([C@@H](O3)OC(=O)C4=CC(=C(C(=C4)OC(=O)C5=CC(=C(C(=C5)O)O)O)O)O)OC(=O)C6=CC(=C(C(=C6)OC(=O)C7=CC(=C(C(=C7)O)O)O)O)O)OC(=O)C8=CC(=C(C(=C8)OC(=O)C9=CC(=C(C(=C9)O)O)O)O)O)OC(=O)C1=CC(=C(C(=C1)OC(=O)C1=CC(=C(C(=C1)O)O)O)O)O
L2300	1016	1.05594	FALSE	TRUE	TRUE	Flavopiridol hydrochloride	Flavopiridol competes with ATP to inhibit CDKs including CDK1, CDK2, CDK4 and CDK6 with IC50 of ~ 40 nM, and CDK7 with IC50 of 300 nM.	C1(=C(C(=C2C(=C1O)C(C=C(O2)C3=C(C=CC=C3)Cl)=O)[C@@]4([C@@H](CN(CC4)C)O)[H])O).Cl
TM-L4	739	1.05872	FALSE	TRUE	TRUE	Nelarabine	Nelarabine is a purine nucleoside analog and DNA synthesis inhibitor with IC50 from 0.067-2.15 μM in tumor cells.	COc1nc(N)nc2n(cnc12)[C@@H]1O[C@H](CO)[C@@H](O)[C@@H]1O
TM-L4	720	1.05971	FALSE	TRUE	TRUE	Tolazoline hydrochloride	Tolazoline is a non-selective competitive α-adrenergic receptor antagonist used in treatment of persistent pulmonary hypertension of the newborn.	Cl.C(C1=NCCN1)c1ccccc1
L1900	782	1.06109	FALSE	TRUE	TRUE	AMG-900	AMG 900 is a potent and highly selective pan-Aurora kinases inhibitor for Aurora A/B/C with IC50 of 5 nM/4 nM /1 nM. It is >10-fold selective for Aurora kinases than p38α, Tyk2, JNK2, Met and Tie2. Phase 1.	C1=CC(=C(N=C1)OC2=CC=C(C=C2)NC3C4=C(C(=NN=3)C5SC=C(C=5)C)C=CC=C4)C6=NC(=NC=C6)N
14030	683	1.06135	FALSE	TRUE	TRUE	GRISEOFULVIN	antifungal, inhibits mitosis in metaphase	COC1=CC(OC)=C(Cl)C2=C1C(=O)[C@]1(O2)[C@H](C)CC(=O)C=C1OC
L2300	770	1.06171	FALSE	TRUE	TRUE	SHAM CONTROL	SHAM CONTROL	SHAM CONTROL
LOPAC	751	1.06275	FALSE	TRUE	TRUE	Rilmenidine hemifumarate	Selective I1 imidazoline receptor agonist.	C1CC1C(NC1=NCCO1)C1CC1
L1900	736	1.06304	FALSE	TRUE	TRUE	EPZ-6438	EPZ-6438 is a potent, and selective EZH2 inhibitor with Ki and IC50 of 2.5 nM and 11 nM, exhibiting a 35-fold selectivity versus EZH1 and >4,500-fold selectivity relative to 14 other HMTs.	C1CC(CCO1)N(CC)C2=C(C(=CC(=C2)C3=CC=C(C=C3)CN4CCOCC4)C(NCC5C(NC(=CC=5C)C)=O)=O)C
TM-L4	747	1.06311	FALSE	TRUE	TRUE	SHAM CONTROL	SHAM CONTROL	SHAM CONTROL
14030	786	1.06413	FALSE	TRUE	TRUE	LEVOBUNOLOL HYDROCHLORIDE	beta-adrenergic blocker	Cl.CC(C)(C)NCC(O)COC1=CC=CC2=C1CCCC2=O
14030	777	1.06422	FALSE	TRUE	TRUE	GALANGIN TRIMETHYL ETHER		COC1=CC(OC)=C2C(=O)C(OC)=C(OC2=C1)C1=CC=CC=C1
14030	692	1.0649	FALSE	TRUE	TRUE	PHENAZOPYRIDINE HYDROCHLORIDE	analgesic	Cl.NC1=NC(N)=C(C=C1)\N=N\C1=CC=CC=C1
TM-L4	732	1.06579	FALSE	TRUE	TRUE	Methazolamide	Methazolamide is a carbonic anhydrase inhibitor that is used as a diuretic and in the treatment of glaucoma.	Cn1nc(sc1=NC(=O)C)S(=O)(=O)N
LOPAC	704	1.06602	FALSE	TRUE	TRUE	Iodoacetamide	Alkylating reagent for cysteine and histidine residues in proteins; irreversible protein inhibitor	NC(=O)CI
14030	722	1.06612	FALSE	TRUE	TRUE	PHENINDIONE	anticoagulant	O=C1C(C(=O)C2=C1C=CC=C2)C1=CC=CC=C1
LOPAC	728	1.06657	FALSE	TRUE	TRUE	Donitriptan monohydrochloride	Donitriptan is a potent, selective 5-HT1B/1D agonist.	Cl.NCCC1=CNC2=CC=C(OCC(=O)N3CCN(CC3)C3=CC=C(C=C3)C#N)C=C12
LOPAC	802	1.0666	FALSE	TRUE	TRUE	Isotharine mesylate	beta-Adrenoceptor agonist; bronchodilator	CS(O)(=O)=O.CCC(NC(C)C)C(O)C1=CC=C(O)C(O)=C1
L2300	775	1.0675	FALSE	TRUE	TRUE	Anastrozole	Anastrozole inhibits the enzyme aromatase.	C1=C(C=C(C=C1CN2C=NC=N2)C(C)(C)C#N)C(C)(C)C#N
TM-L4	723	1.06818	FALSE	TRUE	TRUE	SHAM CONTROL	SHAM CONTROL	SHAM CONTROL
14030	782	1.06832	FALSE	TRUE	TRUE	DONEPEZIL HYDROCHLORIDE	acetylcholinesterase inhibitor (reversible), cognitive enhancer	Cl.COC1=C(OC)C=C2C(=O)C(CC3CCN(CC4=CC=CC=C4)CC3)CC2=C1
14030	706	1.06935	FALSE	TRUE	TRUE	CHLORPROPAMIDE	antidiabetic	CCCNC(=O)NS(=O)(=O)C1=CC=C(Cl)C=C1
14030	895	1.06995	FALSE	TRUE	TRUE	CEPHRADINE	antibacterial	CC1=C(N2C(SC1)[C@H](NC(=O)[C@H](N)C1=CCC=CC1)C2=O)C(O)=O
TM-L4	826	1.07153	FALSE	TRUE	TRUE	SHAM CONTROL	SHAM CONTROL	SHAM CONTROL
14030	768	1.07177	FALSE	TRUE	TRUE	LOPERAMIDE HYDROCHLORIDE	Ca channel blocker	Cl.CN(C)C(=O)C(CCN1CCC(O)(CC1)C1=CC=C(Cl)C=C1)(C1=CC=CC=C1)C1=CC=CC=C1
L2300	766	1.07186	FALSE	TRUE	TRUE	SHAM CONTROL	SHAM CONTROL	SHAM CONTROL
LOPAC	779	1.07215	FALSE	TRUE	TRUE	Nilutamide	Antiandrogen	CC1(C)NC(=O)N(C1=O)C1=CC=C(C(=C1)C(F)(F)F)[N+]([O-])=O
TM-L4	790	1.0754	FALSE	TRUE	TRUE	Chlortetracycline hydrochloride	Chlortetracycline Hydrochloride is a tetracycline with broad-spectrum antibacterial and antiprotozoal activity. Chlortetracycline hydrochloride is bacteriostatic and inhibits bacterial protein synthesis by binding to the 30S ribosomal subunit, thereby preventing the addition of amino acids to the growing peptide chain. This tetracycline is active against a wide range of gram-positive and gram-neg…	Cl.CN(C)[C@H]1[C@@H]2C[C@H]3C(C(=O)c4c(O)ccc(Cl)c4[C@@]3(C)O)=C(O)[C@]2(O)C(=O)C(C(N)=O)=C1O
14030	709	1.0758	FALSE	TRUE	TRUE	CEPHALEXIN	antibacterial	CC1=C(N2[C@H](SC1)[C@H](NC(=O)C(N)C1=CC=CC=C1)C2=O)C(O)=O
LOPAC	788	1.07673	FALSE	TRUE	TRUE	Debrisoquin sulfate	Antihypertensive; metabolized to tetrahydroisoquinoline (TIQ) which may play a role in the induction of Parkinson's Disease	[O-]S([O-])(=O)=O.[NH3+]C(=N)N1CCC2=CC=CC=C2C1.[NH3+]C(=N)N1CCC2=CC=CC=C2C1
LOPAC	794	1.07733	FALSE	TRUE	TRUE	Triamcinolone	Synthetic glucocorticoid agonist; inducer of gene expression and apoptosis	C[C@]12C[C@H](O)[C@@]3(F)[C@@H](CCC4=CC(=O)C=C[C@]34C)[C@@H]1C[C@@H](O)[C@]2(O)C(=O)CO
14030	765	1.08113	FALSE	TRUE	TRUE	TINIDAZOLE	antiprotozoal	CCS(=O)(=O)CCN1C(C)=NC=C1[N+]([O-])=O
L1200	784	1.08114	FALSE	TRUE	TRUE	SHAM CONTROL	SHAM CONTROL	SHAM CONTROL
TM-L4	713	1.08224	FALSE	TRUE	TRUE	Ledipasvir acetone	Ledipasvir (GS5885) is an HCV NS5A polymerase inhibitor, used for the treatment of hepatitis C virus infection.	CC(C)[C@@H](C(=O)N1CC2(CC2)C[C@H]1c1ncc([nH]1)c1cc2c(cc1)c1c(C2(F)F)cc(cc1)c1cc2c(cc1)nc([nH]2)[C@@H]1[C@H]2CC[C@H](C2)N1C(=O)[C@H](C(C)C)NC(=O)OC)NC(=O)OC.CC(=O)C
14030	638	1.08284	FALSE	TRUE	TRUE	DEHYDROCHOLATE SODIUM	choleretic	[Na+].C[C@H](CCC([O-])=O)[C@H]1CCC2C3C(CC(=O)[C@]12C)[C@@]1(C)CCC(=O)CC1CC3=O
14030	930	1.08326	FALSE	TRUE	TRUE	AMODIAQUINE DIHYDROCHLORIDE	antimalarial	Cl.Cl.CCN(CC)CC1=CC=C(NC2=C3C=CC(Cl)=CC3=NC=C2)C=C1O
14030	794	1.08669	FALSE	TRUE	TRUE	CYCLANDELATE	vasodilator	CC1CC(CC(C)(C)C1)OC(=O)C(O)C1=CC=CC=C1
TM-L4	701	1.08823	FALSE	TRUE	TRUE	Aclidinium bromide	Aclidinium is a synthetic anticholinergic agent that is used as an inhalant for treatment of acute bronchospasm due to chronic bronchitis or emphysema. Aclidinium has not been implicated in causing liver enzyme elevations or clinically apparent acute liver injury.	[Br-].s1c(C(O)(C(=O)O[C@@H]2C3CC[N+](C2)(CC3)CCCOc2ccccc2)c2sccc2)ccc1
14030	791	1.0886	FALSE	TRUE	TRUE	MANIDIPINE HYDROCHLORIDE	antihypertensive	COC(=O)C1=C(C)NC(C)=C(C1C1=CC(=CC=C1)[N+]([O-])=O)C(=O)OCCN1CCN(CC1)C(C1=CC=CC=C1)C1=CC=CC=C1
LOPAC	802	1.08974	FALSE	TRUE	TRUE	Pilocarpine nitrate	Nonselective muscarinic acetylcholine receptor agonist	O[N+]([O-])=O.CC[C@H]1[C@@H](CC2=CN=CN2C)COC1=O
L2300	683	1.0899	FALSE	TRUE	TRUE	Vatalanib dihydrochloride (PTK787)	Vatalanib (PTK787) is an inhibitor of VEGFR2/KDR, Flt-1 and c-Kit with IC50 of 37 nM, 77 nM and 730 nM, respectively.	C1(=CC=C2C(=C1)C(=NN=C2CC3=CC=NC=C3)NC4=CC=C(C=C4)Cl).Cl.Cl
14030	856	1.09071	FALSE	TRUE	TRUE	ERYTHROMYCIN ETHYLSUCCINATE	antibacterial	CCOC(=O)CCC(=O)O[C@H]1[C@H](O[C@@H]2[C@@H](C)[C@H](O[C@H]3C[C@@](C)(OC)[C@@H](O)[C@H](C)O3)[C@@H](C)C(=O)O[C@H](CC)[C@@](C)(O)[C@H](O)[C@@H](C)C(=O)[C@H](C)C[C@@]2(C)O)O[C@H](C)C[C@@H]1N(C)C
LOPAC	851	1.0913	FALSE	TRUE	TRUE	L-Glutamic acid, N-phthaloyl-	Selective NMDA glutamate receptor agonist	OC(=O)CCC(N1C(=O)C2=CC=CC=C2C1=O)C(O)=O
14030	796	1.09138	FALSE	TRUE	TRUE	OXICONAZOLE NITRATE	antifungal	O[N+]([O-])=O.ClC1=CC(Cl)=C(CO\N=C(/CN2C=CN=C2)C2=C(Cl)C=C(Cl)C=C2)C=C1
L1200	869	1.09174	FALSE	TRUE	TRUE	Mubritinib (TAK 165)	Mubritinib (TAK-165) is a potent inhibitor of HER2/ErbB2 with IC50 of 6 nM; no activity to EGFR, FGFR, PDGFR, JAK1, Src and Blk.	C1=C(C=CC(=C1)/C=C/C2OC=C(N=2)COC3=CC=C(C=C3)CCCCN4N=NC=C4)C(F)(F)F
L2300	752	1.09306	FALSE	TRUE	TRUE	CDIBA		C(C1C=CC(=CC=1)OCCC2=C(N(C3C=CC(=CC2=3)Cl)C(C4C=CC=CC=4)C5C=CC=CC=5)C)(=O)O
TM-L4	739	1.09322	FALSE	TRUE	TRUE	Nilutamide	Nilutamide, an antineoplastic hormonal agent, is mainly used in the treatment of prostate Y. Nilutamide is a pure, nonsteroidal anti-androgen with affinity for androgen receptors, but not for estrogen, progestogen, or glucocorticoid receptors. Therefore, Nilutamide can block the action of androgens of testicular and adrenal origin that stimulate the growth of malignant and normal prostatic tissue…	CC1(C)NC(=O)N(C1=O)c1cc(c(cc1)[N+](=O)[O-])C(F)(F)F
14030	779	1.09375	FALSE	TRUE	TRUE	CLOFIBRIC ACID	herbicide, antihyperlipoproteinemic, antineoplastic	CC(C)(OC1=CC=C(Cl)C=C1)C(O)=O
TM-L4	667	1.09417	FALSE	TRUE	TRUE	Dopamine hydrochloride	Dopamine is a naturally occurring catecholamine formed by decarboxylation of dihydroxyphenylalanine and a precursor of norepinephrine and epinephrine. Dopamine binds to alpha-1- and beta-1- adrenergic receptors.	Cl.NCCc1cc(O)c(O)cc1
L1900	733	1.09442	FALSE	TRUE	TRUE	PCI-24781 (Abexinostat)	PCI-24781 is a novel pan-HDAC inhibitor mostly targeting HDAC1 with Ki of 7 nM, modest potent to HDACs 2, 3, 6, and 10 and greater than 40-fold selectivity against HDAC8. Phase 1/2.	C1=CC=C2C(=C1)OC(=C2CN(C)C)C(=O)NCCOC3=CC=C(C=C3)C(=O)NO
14030	906	1.09447	FALSE	TRUE	TRUE	HEXACHLOROPHENE	antiinfective (topical)	OC1=C(CC2=C(Cl)C(Cl)=CC(Cl)=C2O)C(Cl)=C(Cl)C=C1Cl
TM-L4	652	1.09457	FALSE	TRUE	TRUE	Aminophylline	Aminophylline is a competitive nonselective phosphodiesterase inhibitor giving a bronchodilatory effect.	NCCN.Cn1c2c([nH]cn2)c(=O)n(C)c1=O.Cn1c2c([nH]cn2)c(=O)n(C)c1=O
14030	648	1.09476	FALSE	TRUE	TRUE	SULINDAC	antiinflammatory	CC1=C(CC(O)=O)C2=C(C=CC(F)=C2)\C1=C/C1=CC=C(C=C1)S(C)=O
LOPAC	737	1.09623	FALSE	TRUE	TRUE	Pirenperone	5-HT2 Serotonin receptor antagonist	CC1=C(CCN2CCC(CC2)C(=O)C2=CC=C(F)C=C2)C(=O)N2C=CC=CC2=N1
TM-L4	690	1.0972	FALSE	TRUE	TRUE	Cefmetazole sodium	Cefmetazole sodium is a semisynthetic cephamycin antibiotic with a broad spectrum of activity against both gram-positive and gram-negative microorganisms. It has a high rate of efficacy in many types of infection and to date no severe side effects have been noted.	[C@]1([C@@H]2N(C1=O)C(=C(CS2)CSc1n(nnn1)C)C(=O)[O-])(NC(=O)CSCC#N)OC.[Na+]
LOPAC	766	1.09726	FALSE	TRUE	TRUE	4-Imidazoleacrylic acid	Histidine ammonia-lyase and decarboxylase inhibitor	OC(=O)\C=C\C1=CNC=N1
TM-L4	652	1.09734	FALSE	TRUE	TRUE	Amikacin Sulfate Salt	Amikacin Sulfate Salt is a broad-spectrum antibiotic derived from KANAMYCIN. It is reno- and ototoxic like the other aminoglycoside antibiotics.	OS(O)(=O)=O.OS(O)(=O)=O.NCC[C@H](O)C(=O)N[C@@H]1C[C@H](N)[C@@H](O[C@H]2O[C@H](CN)[C@@H](O)[C@H](O)[C@H]2O)[C@H](O)[C@H]1O[C@H]1O[C@H](CO)[C@@H](O)[C@H](N)[C@H]1O
14030	725	1.09812	FALSE	TRUE	TRUE	SULFAQUINOXALINE SODIUM	antibacterial, coccidiostat	[Na+].NC1=CC=C(C=C1)S(=O)(=O)[N-]C1=NC2=CC=CC=C2N=C1
TM-L4	731	1.09861	FALSE	TRUE	TRUE	Dapiprazole Hydrochloride	Dapiprazole Hydrochloride is an alpha-1-adrenergic antagonist that acts by blocking alpha-adrenergic receptors in the smooth muscle of blood vessels (arteries, arterioles and veins), gastrointestinal tract, and radial smooth muscle of the iris.	Cc1ccccc1N1CCN(CC1)CCc1nnc2n1CCCC2.Cl
L1200	786	1.09873	FALSE	TRUE	TRUE	BMS-777607	BMS-777607 is a Met-related inhibitor for c-Met, Axl, Ron and Tyro3 with IC50 of 3.9 nM, 1.1 nM, 1.8 nM and 4.3 nM, 40-fold more selective for Met-related targets versus Lck, VEGFR-2, and TrkA/B, and more than 500-fold greater selectivity versus all other receptor and non receptor kinases. Phase 1/2.	C1(=C(N=CC=C1OC2=CC=C(C=C2F)NC(=O)C3C(N(C=CC=3OCC)C4=CC=C(C=C4)F)=O)N)Cl
14030	741	1.09968	FALSE	TRUE	TRUE	COLISTIMETHATE SODIUM	antibacterial	[Na+].[Na+].[Na+].[Na+].[Na+].CCC(C)C1NC(=O)C(NC(=O)C(CCNCS([O-])(=O)=O)NC(=O)C(CCNC(=O)C(NC(=O)C(CCNCS([O-])(=O)=O)NC(=O)C(CCNCS([O-])(=O)=O)NC1=O)C(C)O)NC(=O)C(CCNCS([O-])(=O)=O)NC(=O)C(NC(=O)C(CCNCS([O-])(=O)=O)NC(=O)CCCCC(C)C)C(C)O)C(C)CC
14030	731	1.09984	FALSE	TRUE	TRUE	METHYL DEOXYCHOLATE		COC(=O)CCC(C)C1CCC2C3CC[C@@H]4C[C@H](O)CC[C@]4(C)C3C[C@H](O)[C@]12C
14030	765	1.10045	FALSE	TRUE	TRUE	alpha-LAPACHONE	antineoplastic	CC1(C)CCC2=C(O1)C(=O)C1=CC=CC=C1C2=O
TM-L4	722	1.10069	FALSE	TRUE	TRUE	L-Menthol	L-Menthol is a levo isomer of menthol, an organic compound made synthetically or obtained from peppermint or mint oils with flavoring and local anesthetic properties. When added to pharmaceuticals and foods, menthol functions as a fortifier for peppermint flavors. It also has a counterirritant effect on skin and mucous membranes, thereby producing a local analgesic or anesthetic effect.	CC(C)[C@@H]1CC[C@@H](C)C[C@H]1O
LOPAC	776	1.10118	FALSE	TRUE	TRUE	Vincristine sulfate	Inhibitor of microtubule assembly	OS(O)(=O)=O.CCC1(O)CC2CN(C1)CCC1=C(NC3=CC=CC=C13)[C@@](C2)(C(=O)OC)C1=C(OC)C=C2N(C=O)C3[C@]4(CCN5CC=C[C@](CC)([C@@H]45)[C@@H](OC(C)=O)[C@]3(O)C(=O)OC)C2=C1
LOPAC	574	1.10211	FALSE	TRUE	TRUE	Trandolapril	Angiotensin coverting enzyme (ACE) inhibitor.	CCOC(=O)[C@H](CCC1=CC=CC=C1)N[C@@H](C)C(=O)N1[C@H]2CCCC[C@@H]2C[C@H]1C(O)=O
TM-L4	707	1.10353	FALSE	TRUE	TRUE	Enalaprilat Dihydrate	Enalaprilat（IC50=1.94 nM） is a potent angiotensin-converting enzyme (ACE) inhibitor.	C[C@@H](C(=O)N1CCC[C@H]1C(=O)O)N[C@@H](CCc1ccccc1)C(=O)O.O.O
14030	775	1.10461	FALSE	TRUE	TRUE	CYPERMETHRIN	insecticide	CC1(C)C(C=C(Cl)Cl)C1C(=O)OC(C#N)C1=CC=CC(OC2=CC=CC=C2)=C1
14030	764	1.10521	FALSE	TRUE	TRUE	ZALCITABINE	antiviral	NC1=NC(=O)N(C=C1)[C@H]1CC[C@@H](CO)O1
14030	774	1.10527	FALSE	TRUE	TRUE	PIMETHIXENE MALEATE	H1 antihistamine	OC(=O)\C=C/C(O)=O.CN1CCC(CC1)=C1C2=CC=CC=C2SC2=C1C=CC=C2
14030	808	1.10567	FALSE	TRUE	TRUE	HYDROXYAMPHETAMINE HYDROBROMIDE	analeptic (peripheral)	Br.CC(N)CC1=CC=C(O)C=C1
14030	815	1.10594	FALSE	TRUE	TRUE	PIMPINELLIN	GABA receptor antagonist, phototoxin	COC1=C(OC)C2=C(OC(=O)C=C2)C2=C1OC=C2
LOPAC	850	1.10761	FALSE	TRUE	TRUE	Bethanechol chloride	Muscarinic acetylcholine receptor agonist; resistant to acetylcholinesterase and non-specific cholinesterases	[Cl-].CC(C[N+](C)(C)C)OC(N)=O
14030	815	1.10854	FALSE	TRUE	TRUE	VALPROATE SODIUM	anticonvulsant	[Na+].CCCC(CCC)C([O-])=O
LOPAC	736	1.10957	FALSE	TRUE	TRUE	Tirofiban hydrochloride monohydrate	Tirofiban hydrochloride is a potent non-peptide, glycoprotein IIb/IIIa inhibitor	O.Cl.CCCCS(=O)(=O)N[C@@H](CC1=CC=C(OCCCCC2CCNCC2)C=C1)C(O)=O
14030	832	1.10989	FALSE	TRUE	TRUE	DOBUTAMINE HYDROCHLORIDE	cardiotonic	Cl.CC(CNCCC1=CC(O)=C(O)C=C1)CC1=CC(O)=CC=C1
LOPAC	723	1.11103	FALSE	TRUE	TRUE	U-101958 maleate	Selective D4 dopamine receptor antagonist	OC(=O)\C=C/C(O)=O.CC(C)OC1=C(N=CC=C1)N(C)C1CCN(CC2=CC=CC=C2)CC1
14030	688	1.11111	FALSE	TRUE	TRUE	BISACODYL	cathartic	CC(=O)OC1=CC=C(C=C1)C(C1=CC=C(OC(C)=O)C=C1)C1=CC=CC=N1
14030	683	1.11131	FALSE	TRUE	TRUE	SULFAMETHIZOLE	antibacterial	CC1=NN=C(NS(=O)(=O)C2=CC=C(N)C=C2)S1
14030	740	1.11202	FALSE	TRUE	TRUE	GALANGIN	CYP1A1 inhibitor, vasodilator	OC1=CC(O)=C2C(OC(=C(O)C2=O)C2=CC=CC=C2)=C1
14030	685	1.11369	FALSE	TRUE	TRUE	ANTIPYRINE	analgesic	CN1N(C(=O)C=C1C)C1=CC=CC=C1
TM-L4	725	1.1149	FALSE	TRUE	TRUE	Tedizolid Phosphate	Tedizolid is an oxazolidinone-class antibiotic. Tedizolid phosphate is a phosphate ester prodrug of the active compound tedizolid.	CN1N=NC(=N1)C1=NC=C(C=C1)C1=CC=C(C=C1F)N1C[C@H](COP(O)(O)=O)OC1=O
LOPAC	772	1.11575	FALSE	TRUE	TRUE	Sulindac	COX inhibitor; Anti-inflammatory	CC1=C(CC(O)=O)C2=C(C=CC(F)=C2)\C1=C/C1=CC=C(C=C1)S(C)=O
L2300	767	1.11615	FALSE	TRUE	TRUE	Disulfiram (Antabuse)	Disulfiram is an agent used to support the treatment of chronic alcoholism by producing an acute sensitivity to alcohol.	CCN(C(SSC(N(CC)CC)=S)=S)CC
TM-L4	789	1.11698	FALSE	TRUE	TRUE	Acalabrutinib	Acalabrutinib, also known as ACP-196, is an orally available inhibitor of Bruton’s tyrosine kinase (BTK) with potential antineoplastic activity. Upon administration, ACP-196 inhibits the activity of BTK and prevents the activation of the B-cell antigen receptor (BCR) signaling pathway. This prevents both B-cell activation and BTK-mediated activation of downstream survival pathways. This leads to …	CC#CC(=O)N1CCC[C@H]1c1nc(c2n1ccnc2N)c1ccc(cc1)C(=O)Nc1ccccn1
TM-L4	696	1.117	FALSE	TRUE	TRUE	Belinostat	Belinostat is a novel hydroxamic acid-type histone deacetylase (HDAC) inhibitor with antineoplastic activity. Belinostat targets HDAC enzymes, thereby inhibiting tumor cell proliferation, inducing apoptosis, promoting cellular differentiation, and inhibiting angiogenesis. This agent may sensitize drug-resistant tumor cells to other antineoplastic agents, possibly through a mechanism involving the…	ONC(=O)/C=C/c1cc(ccc1)S(=O)(=O)Nc1ccccc1
14030	887	1.1173	FALSE	TRUE	TRUE	PIPERAZINE	anthelmintic	C1CNCCN1
14030	799	1.11843	FALSE	TRUE	TRUE	NADIFLOXACIN	antibacterial	CC1CCC2=C(N3CCC(O)CC3)C(F)=CC3=C2N1C=C(C(O)=O)C3=O
TM-L4	729	1.11898	FALSE	TRUE	TRUE	Carbidopa Hydrate	Carbidopa Hydrate is an inhibitor of DOPA decarboxylase, preventing the conversion of levodopa to dopamine.	C(=O)([C@@](Cc1cc(c(cc1)O)O)(C)NN)O.O
14030	815	1.11906	FALSE	TRUE	TRUE	SALSOLINE	antihypertensive, antihistamine	COC1=C(O)C=C2CCNC(C)C2=C1
14030	816	1.12071	FALSE	TRUE	TRUE	DIMPYLATE	insecticide, cholinesterase inhibitor	CCOP(=S)(OCC)OC1=CC(C)=NC(=N1)C(C)C
14030	668	1.12308	FALSE	TRUE	TRUE	LAPACHENOL	cytochrome P450 inhibitor, skin sensitizer	COC1=C2C=CC=CC2=C2OC(C)(C)C=CC2=C1
L1900	758	1.12335	FALSE	TRUE	TRUE	SHAM CONTROL	SHAM CONTROL	SHAM CONTROL
14030	666	1.12423	FALSE	TRUE	TRUE	CETIRIZINE HYDROCHLORIDE	H1 antihistamine	Cl.Cl.OC(=O)COCCN1CCN(CC1)C(C1=CC=CC=C1)C1=CC=C(Cl)C=C1
L2300	709	1.12456	FALSE	TRUE	TRUE	Letrozole	Letrozole is an Aromatase inhibitor. CGS 20267 is a new non-steroidal compound which potently inhibits aromatase in vitro (IC50 of 11.5 nM) and in vivo (ED50 of 1–3 μg/kg p.o.)	C1=CC(=CC=C1C(N2N=CN=C2)C3=CC=C(C=C3)C#N)C#N
14030	699	1.12496	FALSE	TRUE	TRUE	ISOPROPAMIDE IODIDE	anticholinergic	[I-].CC(C)[N+](C)(CCC(C(N)=O)(C1=CC=CC=C1)C1=CC=CC=C1)C(C)C
14030	777	1.12512	FALSE	TRUE	TRUE	CARSALAM	analgesic	O=C1NC(=O)C2=CC=CC=C2O1
14030	730	1.12604	FALSE	TRUE	TRUE	5,4'-DIMETHOXY-7-HYDROXYISOFLAVONE		COC1=CC=C(C=C1)C1=COC2=CC(O)=CC(OC)=C2C1=O
14030	895	1.12607	FALSE	TRUE	TRUE	NAPHAZOLINE HYDROCHLORIDE	adrenergic agonist, nasal decongestant	Cl.C(C1=NCCN1)C1=C2C=CC=CC2=CC=C1
14030	649	1.12611	FALSE	TRUE	TRUE	5,7,4'-TRIMETHOXYISOFLAVONE		COC1=CC=C(C=C1)C1=COC2=CC(OC)=CC(OC)=C2C1=O
L1200	721	1.12685	FALSE	TRUE	TRUE	AZD8330	AZD8330 is a novel, selective, non-ATP competitive MEK 1/2 inhibitor with IC50 of 7 nM. Phase 1.	C1=C(C=CC(=C1F)NC2N(C(C(=CC=2C(NOCCO)=O)C)=O)C)I
L2300	687	1.12706	FALSE	TRUE	TRUE	Pioglitazone (Actos)	Pioglitazone (Actos) is a selective peroxisome proliferator-activated receptor gamma stimulator.	C1(=CC=C(N=C1)CCOC2=CC=C(C=C2)CC3C(NC(S3)=O)=O)CC
LOPAC	744	1.12739	FALSE	TRUE	TRUE	8-(p-Sulfophenyl)theophylline	Adenosine receptor antagonist with selectivity for A1 over A2	CN1C2=C(NC(=N2)C2=CC=C(C=C2)S(O)(=O)=O)C(=O)N(C)C1=O
14030	797	1.12782	FALSE	TRUE	TRUE	NIKETHAMIDE	analeptic	CCN(CC)C(=O)C1=CC=CN=C1
L2300	799	1.12819	FALSE	TRUE	TRUE	Necrostatin-1		C12C(CC3C(N(C)C(N3)=S)=O)=CNC=1C=CC=C2
14030	797	1.12842	FALSE	TRUE	TRUE	BETAMIPRON	antibacterial, renal protectant, sweetener	OC(=O)CCNC(=O)C1=CC=CC=C1
L2300	792	1.12919	FALSE	TRUE	TRUE	SID 7969543		C(C(C)OC1C2C=CN(C(C(C=CC=1)=2)=O)CC(=O)NC3C=C4OCCOC4=CC=3)(=O)OCC
LOPAC	685	1.13053	FALSE	TRUE	TRUE	3,4-Dihydroxyphenylacetic acid	Product of dopamine degradation by MAO and aldehyde dehydrogenase	OC(=O)CC1=CC(O)=C(O)C=C1
14030	704	1.13149	FALSE	TRUE	TRUE	EUPHOL ACETATE		CC(CCC=C(C)C)[C@@H]1CC[C@]2(C)C3=C(CC[C@@]12C)C1(C)CC[C@H](OC(C)=O)C(C)(C)C1CC3
LOPAC	782	1.13342	FALSE	TRUE	TRUE	(±)-2-Amino-5-phosphonopentanoic acid	NMDA glutamate receptor antagonist	NC(CCCP(O)(O)=O)C(O)=O
LOPAC	792	1.13363	FALSE	TRUE	TRUE	Xylometazoline hydrochloride	alpha-Adrenoceptor agonist; imidazoline binding site ligand	Cl.CC1=CC(=CC(C)=C1CC1=NCCN1)C(C)(C)C
L2300	728	1.1339	FALSE	TRUE	TRUE	Sirtinol	Sirtinol is a specific SIRT1 and SIRT2 inhibtor with IC50 of 131 μM and 38 μM, respectively.	C(C1C(=CC=CC=1)/N=C/C2C(=CC=C3C=CC=CC=23)O)(=O)NC(C)C4C=CC=CC=4
L2300	739	1.13539	FALSE	TRUE	TRUE	LDE225 (NVP-LDE225, Erismodegib)	LDE225 (NVP-LDE225) is a smoothened antagonist with IC50 of 1.3 nM (mouse) and 2.5 nM (human), respectively.	C1(=CC=C(N=C1)N2C[C@@H](O[C@@H](C2)C)C)NC(C3=C(C(=CC=C3)C4=CC=C(C=C4)OC(F)(F)F)C)=O
TM-L4	801	1.13577	FALSE	TRUE	TRUE	SHAM CONTROL	SHAM CONTROL	SHAM CONTROL
14030	712	1.13661	FALSE	TRUE	TRUE	UBIDECARENONE [5mM]	antioxidant, cardiovascular agent	COC1=C(OC)C(=O)C(C\C=C(/C)CC\C=C(/C)CC\C=C(/C)CC\C=C(\C)CC\C=C(/C)CC\C=C(/C)CC\C=C(/C)CC\C=C(/C)CC\C=C(/C)CCC=C(C)C)=C(C)C1=O
14030	729	1.13679	FALSE	TRUE	TRUE	DIMETHADIONE	anticonvulsant	CC1(C)OC(=O)NC1=O
14030	755	1.13702	FALSE	TRUE	TRUE	CAPREOMYCIN SULFATE [4mM]	antibacterial, tuberculostatic	OS(O)(=O)=O.NCCCC(N)CC(=O)NCC1NC(=O)C(CO)NC(=O)C(N)CNC(=O)C(NC(=O)\C(NC1=O)=C/NC(N)=O)C1CCNC(=N)N1
14030	794	1.13898	FALSE	TRUE	TRUE	SUCRALOSE	sweetener	OC[C@H]1O[C@H](O[C@]2(CCl)O[C@H](CCl)[C@@H](O)[C@@H]2O)[C@H](O)[C@@H](O)[C@H]1Cl
pfizer	737	1.13904	FALSE	TRUE	TRUE	Valdecoxib	Lipid Signaling	CC1=C(C(=NO1)C1=CC=CC=C1)C1=CC=C(C=C1)S(N)(=O)=O
LOPAC	800	1.1404	FALSE	TRUE	TRUE	Ara-G hydrate	Ara-G is an inducer of apoptosis; inhibitor of DNA synthesis; antineoplastic; and antimetabolite.	NC1=NC2=C(N=CN2[C@@H]2O[C@H](CO)[C@@H](O)[C@@H]2O)C(=O)N1
TM-L4	706	1.14075	FALSE	TRUE	TRUE	Dexpanthenol	Dexpanthenol is an alcoholic analogue of D-pantothenic acid and cholinergic agent. Dexpanthenol acts as a precursor of coenzyme A necessary for acetylation reactions and is involved in the synthesis of acetylcholine. Although the exact mechanism of the actions of dexpanthenol is unclear, it may enhance the effect of acetylcholine. Dexpanthenol acts on the gastrointestinal tract and increases lowe…	[C@H](C(=O)NCCCO)(C(CO)(C)C)O
LOPAC	784	1.14266	FALSE	TRUE	TRUE	Tetramisole hydrochloride	Inhibits various mammalian alkaline phosphatases (i.e., liver, kidney, placenta, bone and tumor)	Cl.C1CN2CC(N=C2S1)C1=CC=CC=C1
14030	696	1.14326	FALSE	TRUE	TRUE	LEVONORGESTREL	progestin	CC[C@]12CCC3C(CCC4=CC(=O)CC[C@H]34)C1CC[C@@]2(O)C#C
14030	927	1.14364	FALSE	TRUE	TRUE	HYDROXYPROGESTERONE CAPROATE	progestogen	CCCCCC(=O)O[C@@]1(CCC2C3CCC4=CC(=O)CC[C@]4(C)C3CC[C@]12C)C(C)=O
14030	779	1.14436	FALSE	TRUE	TRUE	TEMAZEPAM	sedative, minor tranquilizer	CN1C2=CC=C(Cl)C=C2C(=NC(O)C1=O)C1=CC=CC=C1
14030	754	1.14455	FALSE	TRUE	TRUE	THIOPHANATE	antifungal (systemic plant)	COC(=O)NC(=S)NC1=C(NC(=S)NC(=O)OC)C=CC=C1
LOPAC	762	1.14512	FALSE	TRUE	TRUE	Clotrimazole	Specific inhibitor of Ca2+-activated K+ channels	ClC1=C(C=CC=C1)C(N1C=CN=C1)(C1=CC=CC=C1)C1=CC=CC=C1
L1900	794	1.14838	FALSE	TRUE	TRUE	CYC116	CYC116 is a potent inhibitor of Aurora A/B with Ki of 8.0 nM/9.2 nM, is less potent to VEGFR2 (Ki of 44 nM), with 50-fold greater potency than CDKs, not active against PKA, Akt/PKB, PKC, no effect on GSK-3α/β, CK2, Plk1 and SAPK2A. Phase 1.	C1(=NC=CC(=N1)C2SC(=NC=2C)N)NC3=CC=C(C=C3)N4CCOCC4
14030	986	1.14857	FALSE	TRUE	TRUE	DOCETAXEL	antineoplastic	O.O.O.CC(=O)O[C@@]12CO[C@@H]1C[C@H](O)[C@]1(C)C2[C@H](OC(=O)C2=CC=CC=C2)[C@]2(O)C[C@H](OC(=O)[C@H](O)[C@@H](NC(=O)OC(C)(C)C)C3=CC=CC=C3)C(C)=C([C@@H](O)C1=O)C2(C)C
L2300	774	1.14897	FALSE	TRUE	TRUE	Imatinib (Gleevec)	Imatinib is a multi-target inhibitor of v-Abl, c-Kit and PDGFR with IC50 of 0.6 μM, 0.1 μM and 0.1 μM, respectively.	N1=C(N=C(C=C1)C2=CC=CN=C2)NC3=CC(=CC=C3C)NC(=O)C4=CC=C(C=C4)CN5CCN(CC5)C
TM-L4	724	1.14927	FALSE	TRUE	TRUE	SHAM CONTROL	SHAM CONTROL	SHAM CONTROL
14030	795	1.14993	FALSE	TRUE	TRUE	CHLORQUINALDOL	antiinfectant, antifungal	CC1=NC2=C(O)C(Cl)=CC(Cl)=C2C=C1
14030	740	1.15009	FALSE	TRUE	TRUE	NITHIAMIDE	antibacterial	CC(=O)NC1=NC=C(S1)[N+]([O-])=O
L1900	777	1.15021	FALSE	TRUE	TRUE	SHAM CONTROL	SHAM CONTROL	SHAM CONTROL
14030	804	1.15035	FALSE	TRUE	TRUE	PANTETHINE	antilipemic	CC(C)(CO)C(O)C(=O)NCCC(=O)NCCSSCCNC(=O)CCNC(=O)C(O)C(C)(C)CO
L2300	754	1.15127	FALSE	TRUE	TRUE	Quizartinib (AC220)	AC220 (Quizartinib) is a potent and selective inhibitor of Flt3ITD and Fltwt with IC50 of 1.1 nM and 4.2 nM, respectively.	C1=C(C=CC(=C1)C2N=C3N(C=2)C4C(S3)=CC(=CC=4)OCCN5CCOCC5)NC(NC6C=C(ON=6)C(C)(C)C)=O
14030	825	1.15243	FALSE	TRUE	TRUE	PHENACYLAMINE HYDROCHLORIDE		Cl.NCC(=O)C1=CC=CC=C1
14030	771	1.15254	FALSE	TRUE	TRUE	GUANADREL SULFATE	antihypertensive	OS(O)(=O)=O.NC(=N)NCC1COC2(CCCCC2)O1
TM-L4	786	1.1528	FALSE	TRUE	TRUE	Fostamatinib	Fostamatinib(IC50 of 41 nM), which is a prodrug of the active metabolite R406, is a Syk inhibitor. It does not work on Lyn.	P(=O)(O)(O)OCN1c2c(OC(C1=O)(C)C)ccc(n2)Nc1nc(ncc1F)Nc1cc(c(c(c1)OC)OC)OC
LOPAC	745	1.15284	FALSE	TRUE	TRUE	Pyridostigmine bromide	Cholinesterase inhibitor	[Br-].CN(C)C(=O)OC1=C[N+](C)=CC=C1
14030	745	1.15372	FALSE	TRUE	TRUE	VECURONIUM BROMIDE	neuromuscular blocker	[Br-].CC(=O)O[C@H]1[C@H](CC2C3CCC4C[C@H](OC(C)=O)[C@H](C[C@]4(C)C3CC[C@]12C)N1CCCCC1)[N+]1(C)CCCCC1
LOPAC	823	1.15376	FALSE	TRUE	TRUE	1,5-Isoquinolinediol	Potent inhibitor of Poly(ADP-ribose) synthetase which is activated by nitric oxide; neuroprotective agent	OC1=CC=CC2=C1C=CN=C2O
14030	784	1.15403	FALSE	TRUE	TRUE	VINBLASTINE SULFATE	antineoplastic, spindle poison	OS(O)(=O)=O.CC[C@]1(O)CC2CN(C1)CCC1=C(NC3=CC=CC=C13)[C@@](C2)(C(=O)OC)C1=C(OC)C=C2N(C)[C@@H]3[C@]4(CCN5CC=C[C@](CC)([C@@H]45)[C@@H](OC(C)=O)[C@]3(O)C(=O)OC)C2=C1
14030	735	1.15534	FALSE	TRUE	TRUE	PROGESTERONE	progestogen	CC(=O)[C@H]1CCC2C3CCC4=CC(=O)CC[C@]4(C)C3CC[C@]12C
14030	754	1.15588	FALSE	TRUE	TRUE	CEDROL	acaricide, enhances skin ECM production	C[C@@H]1CC[C@H]2C(C)(C)C3CC12CC[C@@]3(C)O
LOPAC	790	1.15676	FALSE	TRUE	TRUE	Tyrphostin 47	EGFR tyrosine kinase inhibitor	NC(=S)C(=CC1=CC=C(O)C(O)=C1)C#N
TM-L4	864	1.1575	FALSE	TRUE	TRUE	Alpelisib	Alpelisib is an orally bioavailable PI3Kα inhibitor (IC50: 5 nM in a cell-free assay) with potential antineoplastic activity and minimal effect on PI3Kβ/γ/δ.	Cc1nc(NC(=O)N2CCC[C@H]2C(N)=O)sc1-c1ccnc(c1)C(C)(C)C(F)(F)F
14030	789	1.1581	FALSE	TRUE	TRUE	CEFALONIUM	antibacterial	NC(=O)C1=CC=[N+](CC2=C(N3[C@H](SC2)[C@H](NC(=O)CC2=CC=CS2)C3=O)C([O-])=O)C=C1
14030	913	1.1583	FALSE	TRUE	TRUE	COTININE	antidepressant	CN1[C@@H](CCC1=O)C1=CN=CC=C1
14030	886	1.15838	FALSE	TRUE	TRUE	MELPHALAN	antineoplastic, alkylating agent	N[C@@H](CC1=CC=C(C=C1)N(CCCl)CCCl)C(O)=O
TM-L4	822	1.16146	FALSE	TRUE	TRUE	SHAM CONTROL	SHAM CONTROL	SHAM CONTROL
14030	948	1.16179	FALSE	TRUE	TRUE	RIBOSTAMYCIN SULFATE	antibacterial	OS(O)(=O)=O.NC[C@H]1O[C@H](O[C@@H]2[C@@H](N)C[C@@H](N)[C@H](O)C2O[C@@H]2O[C@H](CO)[C@@H](O)[C@H]2O)[C@H](N)[C@@H](O)[C@@H]1O
LOPAC	770	1.16236	FALSE	TRUE	TRUE	Caffeine	Phosphodiesterase inhibitor; central stimulant	CN1C=NC2=C1C(=O)N(C)C(=O)N2C
TM-L4	754	1.16249	FALSE	TRUE	TRUE	SHAM CONTROL	SHAM CONTROL	SHAM CONTROL
TM-L4	747	1.16307	FALSE	TRUE	TRUE	Cefprozil hydrate	Cefprozil hydrate is a second-generation cephalosporin-type antibiotic.	O.CC=CC1=C(N2[C@H](SC1)[C@H](NC(=O)[C@H](N)c1ccc(O)cc1)C2=O)C(O)=O
14030	703	1.16308	FALSE	TRUE	TRUE	METRONIDAZOLE	antiprotozoal	CC1=NC=C(N1CCO)[N+]([O-])=O
LOPAC	812	1.16352	FALSE	TRUE	TRUE	GR 79236X	A1 adenosine receptor agonist.	OC[C@H]1OC([C@H](O)[C@@H]1O)N1C=NC2=C(N[C@H]3CCC[C@@H]3O)N=CN=C12
L1900	702	1.16406	FALSE	TRUE	TRUE	SHAM CONTROL	SHAM CONTROL	SHAM CONTROL
L2300	749	1.16478	FALSE	TRUE	TRUE	SHAM CONTROL	SHAM CONTROL	SHAM CONTROL
TM-L4	757	1.16515	FALSE	TRUE	TRUE	Naloxegol oxalate	Naloxegol oxalate is a peripherally-selective opioid antagonist for the treatment of opioid-induced constipation.	COCCOCCOCCOCCOCCOCCOCCO[C@H]1CC[C@]2([C@H]3Cc4c5[C@]2([C@H]1Oc5c(cc4)O)CCN3CC=C)O.C(=O)(C(=O)O)O
L2300	743	1.16551	FALSE	TRUE	TRUE	SHAM CONTROL	SHAM CONTROL	SHAM CONTROL
14030	633	1.16588	FALSE	TRUE	TRUE	BECLOMETHASONE DIPROPIONATE	antiasthmatic, topical antiinflammatory	CCC(=O)OCC(=O)C1(OC(=O)CC)C(C)CC2C3CCC4=CC(=O)C=CC4(C)C3(Cl)C(O)CC12C
14030	721	1.16681	FALSE	TRUE	TRUE	AZELASTINE HYDROCHLORIDE	H1 antihistamine (nonsedating); leucotriene synthesis blocker	Cl.CN1CCCC(CC1)N1N=C(CC2=CC=C(Cl)C=C2)C2=CC=CC=C2C1=O
LOPAC	729	1.16689	FALSE	TRUE	TRUE	Azelaic acid	Antiproliferative on melonama cells; inhibits mitochondrial oxidoreductases of the respiratory chain and inhibits DNA synthesis	OC(=O)CCCCCCCC(O)=O
L2300	856	1.16723	FALSE	TRUE	TRUE	SHAM CONTROL	SHAM CONTROL	SHAM CONTROL
14030	868	1.16731	FALSE	TRUE	TRUE	HYOSCYAMINE	anticholinergic, analgesic	CN1C2CC[C@@H]1C[C@H](C2)OC(=O)[C@H](CO)C1=CC=CC=C1
14030	601	1.16771	FALSE	TRUE	TRUE	DEXAMETHASONE	glucocorticoid	C[C@@H]1CC2C3CCC4=CC(=O)C=C[C@]4(C)[C@@]3(F)[C@@H](O)C[C@]2(C)[C@@]1(O)C(=O)CO
TM-L4	752	1.1681	FALSE	TRUE	TRUE	Ramipril	Ramipril is a long-acting angiotensin-converting enzyme inhibitor. It is a prodrug that is transformed in the liver to its active metabolite ramiprilat.	N1([C@@H]2[C@H](C[C@H]1C(=O)O)CCC2)C(=O)[C@@H](N[C@@H](CCc1ccccc1)C(=O)OCC)C
LOPAC	719	1.16914	FALSE	TRUE	TRUE	Tropicamide	M4 muscarinic acetylcholine receptor antagonist	CCN(CC1=CC=NC=C1)C(=O)C(CO)C1=CC=CC=C1
LOPAC	764	1.16914	FALSE	TRUE	TRUE	Zaprinast	Selective cGMP-phosphodiesterase type V inhibitor	CCCOC1=CC=CC=C1C1=NC(=O)C2=C(NN=N2)N1
14030	681	1.17019	FALSE	TRUE	TRUE	FENOFIBRIC ACID	antihyperlipidemic	CC(C)(OC1=CC=C(C=C1)C(=O)C1=CC=C(Cl)C=C1)C(O)=O
TM-L4	832	1.17029	FALSE	TRUE	TRUE	Neratinib	Neratinib (HKI-272) is an orally available, irreversible tyrosine kinase inhibitor for HER2 and EGFR (IC50: 59/92 nM), respectively.	CCOc1cc2ncc(C#N)c(Nc3ccc(OCc4ccccn4)c(Cl)c3)c2cc1NC(=O)\C=C\CN(C)C
L2300	666	1.17091	FALSE	TRUE	TRUE	GSK1120212 (Trametinib)	GSK1120212 (JTP-74057, trametinib) is a highly specific and potent MEK1 and MEK2 inhibitor with IC50 of 0.92 nM and 1.8 nM, respectively.	C1(N(C(=C2C(=C1C)N(C(N(C2=O)C3CC3)=O)C4=CC(=CC=C4)NC(C)=O)NC5=CC=C(C=C5F)I)C)=O
L2300	851	1.17153	FALSE	TRUE	TRUE	LY294002	LY294002 is a PI3K inhibitor for p110α, p110δ and p110β with IC50 of 0.5 μM, 0.57 μM and 0.97 μM, respectively.	C1=CC(=C2C(=C1)C(C=C(O2)N3CCOCC3)=O)C4=CC=CC=C4
14030	657	1.17175	FALSE	TRUE	TRUE	PYRIDOXINE	vitamin B6, enzyme cofactor	CC1=NC=C(CO)C(CO)=C1O
14030	834	1.17291	FALSE	TRUE	TRUE	CYTISINE	antiinflammatory, respiratory stimulant	O=C1C=CC=C2C3CNC[C@@H](C3)CN12
LOPAC	781	1.17638	FALSE	TRUE	TRUE	(±)-2-Amino-3-phosphonopropionic acid	NMDA glutamate receptor antagonist	NC(CP(O)(O)=O)C(O)=O
TM-L4	772	1.17656	FALSE	TRUE	TRUE	Apatinib mesylate	Apatinib is an orally bioavailable and specific VEGFR2 inhibitor (IC50: 1 nM). In addition, this agent mildly inhibits c-Kit and c-SRC tyrosine kinases.	CS(O)(=O)=O.O=C(Nc1ccc(cc1)C1(CCCC1)C#N)c1cccnc1NCc1ccncc1
L1900	683	1.17743	FALSE	TRUE	TRUE	SHAM CONTROL	SHAM CONTROL	SHAM CONTROL
TM-L4	757	1.17752	FALSE	TRUE	TRUE	Stavudine	Stavudine, a nucleoside reverse transcriptase inhibitor analog of thymidine, has activity against HIV.	n1(c(=O)[nH]c(=O)c(c1)C)[C@@H]1O[C@@H](C=C1)CO
L1900	795	1.17772	FALSE	TRUE	TRUE	SHAM CONTROL	SHAM CONTROL	SHAM CONTROL
14030	791	1.17823	FALSE	TRUE	TRUE	ASARYLALDEHYDE	fly attractant	COC1=CC(OC)=C(OC)C=C1C=O
TM-L4	730	1.18018	FALSE	TRUE	TRUE	Clozapine	Clozapine is a tricylic dibenzodiazepine, classified as an atypical antipsychotic agent. It binds several types of central nervous system receptors, and displays a unique pharmacological profile. Clozapine is a serotonin antagonist, with strong binding to 5-HT 2A/2C receptor subtype. It also displays strong affinity to several dopaminergic receptors, but shows only weak antagonism at the dopamine…	N1=C(c2c(Nc3c1cc(cc3)Cl)cccc2)N1CCN(CC1)C
14030	939	1.18179	FALSE	TRUE	TRUE	MEDROXYPROGESTERONE ACETATE	contraceptive	C[C@H]1CC2C3CC[C@](OC(C)=O)(C(C)=O)[C@@]3(C)CCC2[C@@]2(C)CCC(=O)C=C12
LOPAC	758	1.18366	FALSE	TRUE	TRUE	Phosphomycin disodium	Antibiotic; interferes with cell wall synthesis	[Na+].[Na+].CC1OC1P([O-])([O-])=O
TM-L4	814	1.18374	FALSE	TRUE	TRUE	SHAM CONTROL	SHAM CONTROL	SHAM CONTROL
TM-L4	639	1.18386	FALSE	TRUE	TRUE	Tenofovir Disoproxil	Tenofovir Disoproxil is a nucleotide reverse transcriptase inhibitor to treat HIV and chronic Hepatitis B.	CC(C)OC(=O)OCOP(=O)(COC(C)Cn1cnc2c(N)ncnc12)OCOC(=O)OC(C)C
14030	716	1.18761	FALSE	TRUE	TRUE	BROMPHENIRAMINE MALEATE	H1 antihistamine	OC(=O)\C=C/C(O)=O.CN(C)CCC(C1=CC=C(Br)C=C1)C1=CC=CC=N1
L1900	790	1.18806	FALSE	TRUE	TRUE	SHAM CONTROL	SHAM CONTROL	SHAM CONTROL
14030	735	1.18841	FALSE	TRUE	TRUE	DOXYLAMINE SUCCINATE	antihistaminic, hypnotic	OC(=O)CCC(O)=O.CN(C)CCOC(C)(C1=CC=CC=C1)C1=CC=CC=N1
14030	822	1.18929	FALSE	TRUE	TRUE	1R,2S-PHENYLPROPYLAMINE	decongestant	C[C@H](N)[C@H](O)C1=CC=CC=C1
L2300	735	1.18997	FALSE	TRUE	TRUE	SHAM CONTROL	SHAM CONTROL	SHAM CONTROL
pfizer	700	1.19019	FALSE	TRUE	TRUE	PD-166866	Tyrosine Kinase	COC1=CC(=CC(OC)=C1)C1=CC2=C(N=C(N)N=C2)N=C1NC(=O)NC(C)(C)C
14030	845	1.19072	FALSE	TRUE	TRUE	DEXAMETHASONE	glucocorticoid	C[C@@H]1CC2C3CCC4=CC(=O)C=C[C@]4(C)[C@@]3(F)[C@@H](O)C[C@]2(C)[C@@]1(O)C(=O)CO
TM-L4	734	1.19113	FALSE	TRUE	TRUE	Entecavir hydrate	Entecavir is a selective inhibitor of the replication of the hepatitis B virus (HBV). It, a new deoxyguanine nucleoside analog.	O.Nc1nc(=O)c2ncn([C@H]3C[C@H](O)[C@@H](CO)C3=C)c2[nH]1
14030	826	1.19191	FALSE	TRUE	TRUE	2,3,4-TRIHYDROXY-4'-ETHOXYBENZOPHENONE		CCOC1=CC=C(C=C1)C(=O)C1=CC=C(O)C(O)=C1O
L1200	722	1.19324	FALSE	TRUE	TRUE	PHT-427	PHT-427 is a dual Akt and PDPK1 inhibitor (high affinity binding for the PH domains of Akt and PDPK1) with Ki of 2.7 μM and 5.2 μM, respectively.	C1=C(C=CC(=C1)S(=O)(NC2=NN=CS2)=O)CCCCCCCCCCCC
TM-L4	730	1.19365	FALSE	TRUE	TRUE	Cefpodoxime proxetil	Cefpodoxime is an oral third generation cephalosporin antibiotic. It is active against most Gram positive and Gram negative bacteria. It is commonly used to treat acute otitis media, pharyngitis, and sinusitis. Cefpodoxime proxetil is a prodrug which is absorbed and de-esterified by the intestinal mucosa to Cefpodoxime.	COCC1=C(N2[C@H](SC1)[C@H](NC(=O)C(=N/OC)\c1csc(N)n1)C2=O)C(=O)OC(C)OC(=O)OC(C)C
LOPAC	792	1.19522	FALSE	TRUE	TRUE	PD 168,077 maleate	Selective D4 dopamine receptor agonist	OC(=O)\C=C/C(O)=O.CC1=CC(=CC=C1)C(=O)NCN1CCN(CC1)C1=CC=CC=C1C#N
L1200	777	1.19617	FALSE	TRUE	TRUE	Pimasertib (AS-703026)	AS-703026 is a highly selective, potent, ATP non-competitive allosteric inhibitor of MEK1/2 with IC50 of 5 nM-2 μM in MM cell lines. Phase 1/2.	C1=C(C=CC(=C1F)NC2=CN=CC=C2C(NC[C@@H](CO)O)=O)I
TM-L4	722	1.19658	FALSE	TRUE	TRUE	Clonidine hydrochloride	Clonidine is a centrally active alpha-adrenergic agonist used predominantly as an antihypertensive agent, usually in combination with other agents. Despite wide scale use for many years, clonidine has not been linked definitively to either serum aminotransferase elevations or clinically apparent liver injury.	Cl.Clc1cccc(Cl)c1NC1=NCCN1
LOPAC	769	1.19683	FALSE	TRUE	TRUE	Alprenolol hydrochloride	beta Adrenoceptor antagonist	Cl.CC(C)NCC(O)COC1=CC=CC=C1CC=C
14030	754	1.19713	FALSE	TRUE	TRUE	ETHOXZOLAMIDE	carbonic anhydrase inhibitor, antiulcer, antiglaucoma	CCOC1=CC=C2N=C(SC2=C1)S(N)(=O)=O
LOPAC	744	1.19747	FALSE	TRUE	TRUE	Taurine	Non-selective endogenous agonist at glycine receptors	NCCS(O)(=O)=O
L2300	792	1.19762	FALSE	TRUE	TRUE	SHAM CONTROL	SHAM CONTROL	SHAM CONTROL
LOPAC	765	1.19773	FALSE	TRUE	TRUE	BRL 50481	Phosphodiesterase 7 (PDE7) inhibitor	CN(C)S(=O)(=O)C1=C(C)C=CC(=C1)[N+]([O-])=O
TM-L4	661	1.20019	FALSE	TRUE	TRUE	Alfuzosin hydrochloride	Alfuzosin hydrochloride is an α1 adrenergic receptor antagonist. It applies to treat benign prostatic hyperplasia (BPH).	Cl.COc1c(OC)cc2c(N)nc(nc2c1)N(C)CCCNC(=O)C1CCCO1
LOPAC	747	1.20045	FALSE	TRUE	TRUE	(6R)-5,6,7,8-Tetrahydro-L-biopterin hydrochloride	Cofactor for tyrosine hydroxylase, tryptophan hydroxylase and nitric oxide synthase	Cl.Cl.CC(O)C(O)[C@H]1CNC2=C(N1)C(=O)NC(N)=N2
TM-L4	740	1.20055	FALSE	TRUE	TRUE	Amcinonide	Amcinonide is a Corticosteroid. The mechanism of action of amcinonide is as a Corticosteroid Hormone Receptor Agonist.	CC(=O)OCC(=O)[C@@]12[C@@H](C[C@@H]3[C@@]1(C[C@@H]([C@]1([C@H]3CCC3=CC(=O)C=C[C@]13C)F)O)C)OC1(O2)CCCC1
TM-L4	742	1.20055	FALSE	TRUE	TRUE	Carteolol hydrochloride	Carteolol Hydrochloride is a synthetic quinolinone derivative, antihypertensive Carteolol Hydrochloride is a nonselective beta-adrenoceptor blocking agent for beta-1 and beta-2 receptors with no membrane-stabilizing activity but moderate intrinsic sympathomimetic effects. It is used for the treatment of hypertension and certain arrhythmias and as an anti-angina and antiglaucoma agent.	Cl.CC(C)(C)NCC(O)COc1cccc2c1CCC(=O)N2
14030	714	1.20149	FALSE	TRUE	TRUE	SULFADOXINE	antibacterial	COC1=NC=NC(NS(=O)(=O)C2=CC=C(N)C=C2)=C1OC
LOPAC	831	1.20171	FALSE	TRUE	TRUE	(±)-Chloro-APB hydrobromide	D1 dopamine receptor agonist.	Br.OC1=CC2=C(CCN(CC=C)CC2C2=CC=CC=C2)C(Cl)=C1O
LOPAC	788	1.20199	FALSE	TRUE	TRUE	(-)-Scopolamine,n-Butyl-, bromide	Cholinergic receptor antagonist	[Br-].CCCC[N+]1(C)C2CC(CC1C1OC21)OC(=O)[C@H](CO)C1=CC=CC=C1
14030	776	1.20237	FALSE	TRUE	TRUE	PHENETHYLAMINE HYDROCHLORIDE	CNS stimulant	Cl.NCCC1=CC=CC=C1
TM-L4	726	1.20451	FALSE	TRUE	TRUE	Cortisone acetate	Cortisone Acetate is the acetate salt form of cortisone, a synthetic or semisynthetic analog of the naturally occurring cortisone hormone produced by the adrenal glands with anti-inflammatory and immunomodulating properties. Cortisone acetate diffuses through the cell membrane and binds to nuclear glucocorticoid receptors. The receptor-ligand complex binds to promotor regions of certain genes and…	CC(=O)OCC(=O)[C@@]1(O)CC[C@H]2[C@@H]3CCC4=CC(=O)CC[C@]4(C)[C@H]3C(=O)C[C@]12C
L1200	852	1.20453	FALSE	TRUE	TRUE	SB415286	SB415286 is a potent GSK3α inhibitor with IC50/Ki of 78 nM/31 nM with equally effective inhibition of GSK-3β.	C1(C(=C(C(N1)=O)NC2=CC(=C(C=C2)O)Cl)C3=C(C=CC=C3)[N+](=O)[O-])=O
TM-L4	788	1.20467	FALSE	TRUE	TRUE	Flibanserin	Flibanserin is a serotonergic antidepressant used to treat hypoactive sexual desire disorder. Flibanserin has been associated with a low rate of minor serum aminotransferase elevations during treatment but has not been linked to instances of clinically apparent acute liver injury.	FC(F)(F)c1cccc(c1)N1CCN(CCn2c3ccccc3[nH]c2=O)CC1
14030	863	1.20481	FALSE	TRUE	TRUE	HYDROCORTISONE HEMISUCCINATE	glucocorticoid	C[C@]12C[C@H](O)C3C(CCC4=CC(=O)CC[C@]34C)C1CC[C@]2(O)C(=O)COC(=O)CCC(O)=O
LOPAC	752	1.20615	FALSE	TRUE	TRUE	5-Hydroxy-L-tryptophan	Serotonin precursor; antidepressant; anti-epileptic	N[C@@H](CC1=CNC2=C1C=C(O)C=C2)C(O)=O
LOPAC	677	1.20707	FALSE	TRUE	TRUE	(-)-Eseroline fumarate	Metabolite of physostigmine (eserine); potent analgesic; cholinesterase inhibitor	OC(=O)\C=C/C(O)=O.CN1CC[C@]2(C)C1N(C)C1=C2C=C(O)C=C1
14030	829	1.2093	FALSE	TRUE	TRUE	2',5'-DIHYDROXY-4-METHOXYCHALCONE	activates PPAR-gamma ligand	COC1=CC=C(\C=C\C(=O)C2=CC(O)=CC=C2O)C=C1
TM-L4	712	1.20938	FALSE	TRUE	TRUE	Dimesna	Dimesna is a synthetic derivative of dithio-ethane sulfonate with uroprotective properties.	[O-]S(=O)(=O)CCSSCCS(=O)(=O)[O-].[Na+].[Na+]
14030	686	1.21021	FALSE	TRUE	TRUE	AMPHOTERICIN B	antifungal	CC1OC(O[C@@H]2CC3O[C@@](O)(C[C@H](O)C3C(O)=O)CC(O)CC(O)C(O)CCC(O)CC(O)CC(=O)O[C@@H](C)[C@H](C)[C@H](O)[C@@H](C)\C=C\C=C\C=C\C=C\C=C\C=C\C=C\2)C(O)[C@H](N)C1O
LOPAC	781	1.21037	FALSE	TRUE	TRUE	Adenosine	Endogenous neurotransmitter and neuromodulator	NC1=NC=NC2=C1N=CN2[C@@H]1O[C@H](CO)[C@H](O)C1O
LOPAC	737	1.21115	FALSE	TRUE	TRUE	3-Morpholinosydnonimine hydrochloride	Liberates nitric oxide (NO) spontaneously when in solution, activating guanylyl cyclase and causing an increase in cyclic-GMP. This product is a vasodilator and inhibits platelet aggregation.	Cl.[NH-]C1=C[N+](=NO1)N1CCOCC1
LOPAC	696	1.21123	FALSE	TRUE	TRUE	Dihydrokainic acid	Non-transportable glutamate analog that blocks glutamate receptors	CC(C)[C@H]1CN[C@@H]([C@H]1CC(O)=O)C(O)=O
14030	775	1.21135	FALSE	TRUE	TRUE	CYACETACIDE	antibacterial, tuberculostatic	NNC(=O)CC#N
14030	806	1.21136	FALSE	TRUE	TRUE	5-HYDROXY-2',4',7,8-TETRAMETHOXYFLAVONE		COC1=CC(OC)=C(C=C1)C1=CC(=O)C2=C(O)C=C(OC)C(OC)=C2O1
14030	837	1.2117	FALSE	TRUE	TRUE	4-METHYLESCULETIN		CC1=CC(=O)OC2=C1C=C(O)C(O)=C2
L1200	789	1.21254	FALSE	TRUE	TRUE	SSR128129E	SSR128129E is an orally-active and allosteric FGFR1 inhibitor with IC50 of 1.9 μM, while not affecting other related RTKs.	C1=CC2N(C(=C(C=2OC)C)C(=O)C3=CC=C(C(=C3)C(O[Na])=O)N)C=C1
TM-L4	766	1.21365	FALSE	TRUE	TRUE	Apixaban	Apixaban is an orally active inhibitor of coagulation factor Xa with anticoagulant activity. Apixaban directly inhibits factor Xa, thereby interfering with the conversion of prothrombin to thrombin and preventing the formation of cross-linked fibrin clots.	N1(CCc2c(C1=O)n(nc2C(=O)N)c1ccc(cc1)OC)c1ccc(cc1)N1CCCCC1=O
14030	809	1.21381	FALSE	TRUE	TRUE	DOCETAXEL	antineoplastic	O.O.O.CC(=O)O[C@@]12CO[C@@H]1C[C@H](O)[C@]1(C)C2[C@H](OC(=O)C2=CC=CC=C2)[C@]2(O)C[C@H](OC(=O)[C@H](O)[C@@H](NC(=O)OC(C)(C)C)C3=CC=CC=C3)C(C)=C([C@@H](O)C1=O)C2(C)C
TM-L4	741	1.21428	FALSE	TRUE	TRUE	Ethacrynic acid	Ethacrynic acid is a nonsulfonamide loop diuretic that inhibits the activity of the Na+/K+/2Cl- cotransporter NKCC2 in the thick ascending limb of the loop of Henle. It also inhibits glutathione S-transferase and Wnt signalling, producing cytotoxicity in chronic lymphocytic leukaemia cells and other tumour cells.	CCC(=C)C(=O)c1ccc(OCC(O)=O)c(Cl)c1Cl
14030	856	1.21509	FALSE	TRUE	TRUE	CHLORTETRACYCLINE HYDROCHLORIDE	antibacterial, antiamebic, Ca chelator, hepatotoxic; inhibits protein synthesis	Cl.CN(C)[C@H]1[C@@H]2C[C@H]3C(=C(O)[C@]2(O)C(=O)C(C(N)=O)=C1O)C(=O)C1=C(C(Cl)=CC=C1O)[C@@]3(C)O
14030	737	1.21544	FALSE	TRUE	TRUE	PHENIRAMINE MALEATE	antihistaminic	OC(=O)\C=C/C(O)=O.CN(C)CCC(C1=CC=CC=C1)C1=CC=CC=N1
14030	702	1.21638	FALSE	TRUE	TRUE	CHLORAMPHENICOL	antibacterial, antirickettsial, inhibits protein synthesis	OC[C@H](NC(=O)C(Cl)Cl)[C@H](O)C1=CC=C(C=C1)[N+]([O-])=O
TM-L4	809	1.21694	FALSE	TRUE	TRUE	SHAM CONTROL	SHAM CONTROL	SHAM CONTROL
LOPAC	718	1.217	FALSE	TRUE	TRUE	THIP hydrochloride	GABA-A receptor agonist, with some GABA-C receptor agonist activity	Cl.OC1=NOC2=C1CCNC2
TM-L4	679	1.21703	FALSE	TRUE	TRUE	lysine	Lysine is one of nine essential amino acids in humans required for growth and tissue repair, Lysine is supplied by many foods, especially red meats, fish, and dairy products. Lysine seems to be active against herpes simplex viruses and present in many forms of diet supplements. The mechanism underlying this effect is based on the viral need for amino acid arginine; lysine competes with arginine f…	NCCCC[C@H](N)C(O)=O
TM-L4	634	1.21706	FALSE	TRUE	TRUE	D-Biotin	Biotin is a water-soluble B-vitamin and is necessary for cell growth, the production of fatty acids, and the metabolism of fats and amino acids.	[C@H]1(SC[C@@H]2NC(=O)N[C@H]12)CCCCC(=O)O
14030	563	1.2172	FALSE	TRUE	TRUE	BROMOCRIPTINE MESYLATE	prolactin inhibitor, antiparkinsonian	CS(O)(=O)=O.CC(C)CC1N2C(=O)[C@](NC(=O)C3CN(C)[C@@H]4CC5=C(Br)NC6=CC=CC(=C56)C4=C3)(OC2(O)[C@@H]2CCCN2C1=O)C(C)C
14030	727	1.21774	FALSE	TRUE	TRUE	METHYSERGIDE MALEATE	vasoconstrictor, antimigraine	OC(=O)\C=C/C(O)=O.CC[C@@H](CO)NC(=O)[C@H]1CN(C)[C@@H]2CC3=CN(C)C4=CC=CC(=C34)C2=C1
14030	762	1.21923	FALSE	TRUE	TRUE	ORNIDAZOLE	antiinfective	CC1=NC=C(N1CC(O)CCl)[N+]([O-])=O
TM-L4	861	1.22184	FALSE	TRUE	TRUE	Vilazodone HCl	Vilazodone HCl, a partial agonist of 5-HT1A receptors and specific serotonin reuptake inhibitor (SSRI), is utilized in treating of the major depressive disorder.	C1CN(CCN1CCCCc1c[nH]c2c1cc(cc2)C#N)c1cc2c(cc1)oc(c2)C(=O)N.Cl
14030	693	1.222	FALSE	TRUE	TRUE	CLOPIDOGREL SULFATE	platelet aggregation inhibitor	OS(O)(=O)=O.COC(=O)[C@@H](N1CCC2=C(C1)C=CS2)C1=C(Cl)C=CC=C1
LOPAC	599	1.22321	FALSE	TRUE	TRUE	Niflumic acid	Selective prostaglandin H synthase 2 (PGHS-2) inhibitor	OC(=O)C1=CC=CN=C1NC1=CC=CC(=C1)C(F)(F)F
L2300	752	1.22352	FALSE	TRUE	TRUE	Axitinib	Axitinib (AG-013736) is a multi-target inhibitor of VEGFR1, VEGFR2, VEGFR3, PDGFRβ and c-Kit with IC50 of 0.1 nM, 0.2 nM, 0.1-0.3 nM, 1.6 nM and 1.7 nM, respectively.	C1(=CC=CC=C1C(=O)NC)SC2=CC3=C(C=C2)C(=NN3)/C=C/C4=CC=CC=N4
14030	803	1.22362	FALSE	TRUE	TRUE	CARTEOLOL HYDROCHLORIDE	beta-adrenergic blocker	Cl.CC(C)(C)NCC(O)COC1=C2CCC(=O)NC2=CC=C1
14030	751	1.22476	FALSE	TRUE	TRUE	o-VERATRALDEHYDE		COC1=CC=CC(C=O)=C1OC
14030	720	1.22514	FALSE	TRUE	TRUE	8-CYCLOPENTYLTHEOPHYLLINE	A1 adenosine agonist	CN1C2=C(N=C(N2)C2CCCC2)C(=O)N(C)C1=O
L2300	767	1.22542	FALSE	TRUE	TRUE	Mocetinostat (MGCD0103)	MGCD0103 (Mocetinostat) is a potent HDAC inhibitor for HDAC1, HDAC2 and HDAC3 with IC50 of 0.15 μM, 0.29 μM and 1.66 μM, respectively.	C(C1C=CC(=CC=1)CNC2N=C(C=CN=2)C3C=NC=CC=3)(=O)NC4C(=CC=CC=4)N
L2300	756	1.22542	FALSE	TRUE	TRUE	PI-103	PI-103 is a potent, ATP-competitive PI3K inhibitor of DNA-PK, p110α, mTORC1, PI3KC2β, p110δ, mTORC2, p110β, and p110γ with IC50 of 2 nM, 8 nM, 20 nM, 26 nM, 48 nM, 83 nM, 88 nM and 150 nM, respectively.	C12=C(N=C(N=C1N3CCOCC3)C4=CC=CC(=C4)O)C5=C(O2)N=CC=C5
L2300	665	1.22613	FALSE	TRUE	TRUE	Valproic acid sodium salt (Sodium valproate)	Valproic acid sodium salt (Sodium valproate) is a HDAC inhibitor with IC50 of 0.4 mM and also inhibits GABA-transaminase or succinic semialdehyde dehydrogenase.	CCCC(C(O[Na])=O)CCC
14030	656	1.22783	FALSE	TRUE	TRUE	BENSERAZIDE HYDROCHLORIDE	decarboxylase inhibitor	Cl.NC(CO)C(=O)NNCC1=C(O)C(O)=C(O)C=C1
14030	906	1.22796	FALSE	TRUE	TRUE	CEFOTAXIME SODIUM	antibacterial	[Na+].CO\N=C(\C(=O)N[C@H]1[C@H]2SCC(COC(C)=O)=C(N2C1=O)C([O-])=O)C1=CSC(N)=N1
LOPAC	774	1.22856	FALSE	TRUE	TRUE	Carboplatin	Antineoplastic	[NH3+][Pt]1([NH3+])OC(=O)C2(CCC2)C(=O)O1
LOPAC	753	1.22929	FALSE	TRUE	TRUE	Sobuzoxane	DNA topoisomerase II inhibitor; induces apoptosis.	CC(C)COC(=O)OCN1C(=O)CN(CCN2CC(=O)N(COC(=O)OCC(C)C)C(=O)C2)CC1=O
[truncated: 3,749 more rows]

## Sheet: Table S1B
Library	Cells	Fusion Z-Score	Hit?	QC?	NonToxic?	Compound Name	Vendor Description of Compound	Compound SMILES Identifier
LOPAC	37	-28.2851	TRUE	TRUE	FALSE	BNTX maleate salt hydrate	BNTX is a selective d1 non peptide opioid receptor antagonist. BNTX is used as a tool for the study of various function of opioid receptors including alcohol and drug dependence	OC(=O)\C=C/C(O)=O.OC1=CC=C2C[C@H]3N(CC4CC4)CC[C@@]45[C@@H](OC1=C24)C(=O)\C(C[C@@]35O)=C\C1=CC=CC=C1
14030	259	-24.1888	TRUE	TRUE	FALSE	CHICAGO SKY BLUE	inhibitor of aminoacid uptake	[Na+].[Na+].[Na+].[Na+].COC1=CC(=CC=C1\N=N\C1=C(O)C2=C(N)C(=CC(=C2C=C1)S([O-])(=O)=O)S([O-])(=O)=O)C1=CC(OC)=C(C=C1)\N=N\C1=C(O)C2=C(N)C(=CC(=C2C=C1)S([O-])(=O)=O)S([O-])(=O)=O
14030	24	-23.2447	TRUE	TRUE	FALSE	ESCIN	membrane permeabilizer	C\C=C(\C)C(=O)O[C@@H]1[C@H](OC(C)=O)[C@]2(CO)[C@H](O)C[C@]3(C)C(=CCC4[C@@]5(C)CC[C@H](O[C@@H]6O[C@@H]([C@@H](O[C@@H]7O[C@H](CO)[C@@H](O)[C@H](O)[C@H]7O)[C@H](O)[C@H]6O[C@@H]6O[C@H](CO)[C@@H](O)[C@H](O)[C@H]6O)C(O)=O)[C@](C)(CO)C5CC[C@@]34C)C2CC1(C)C
LOPAC	200	-22.9669	TRUE	TRUE	FALSE	6-Hydroxy-DL-DOPA	Precursor of the catecholaminergic neurotoxin, 6-hydroxydopamine; converted to 6-hydroxydopamine by L-aromatic amino acid decarboxylase	NC(CC1=C(O)C=C(O)C(O)=C1)C(O)=O
14030	48	-22.7117	TRUE	TRUE	FALSE	PARTHENOLIDE	5HT antagonist, antineoplastic, smooth muscle relaxant	C\C1=C/CC[C@]2(C)OC2[C@H]2OC(=O)C(=C)[C@@H]2CC1
14030	156	-22.3591	TRUE	TRUE	FALSE	MITOXANTRONE HYDROCHLORIDE	antineoplastic	Cl.Cl.OCCNCCNC1=CC=C(NCCNCCO)C2=C1C(=O)C1=C(O)C=CC(O)=C1C2=O
LOPAC	68	-22.0684	TRUE	TRUE	FALSE	CP-31398 dihydrochloride hydrate	CP-31398 dihyrochloride hydrate is a p53 stabilizer; apoptosis inducer	Cl.Cl.COC1=CC=C(\C=C\C2=NC3=CC=CC=C3C(NCCCN(C)C)=N2)C=C1
L2300	54	-20.478	TRUE	TRUE	FALSE	SCH 79797		C12(C3=C(N(CC4C=CC(=CC=4)C(C)C)C=C3)C=CC=1N=C(N=C2N)NC5CC5).Cl.Cl
LOPAC	102	-20.1017	TRUE	TRUE	FALSE	Bay 11-7082	Inhibitor of cytokine-induced IKB-alpha phosphorylation	CC1=CC=C(C=C1)S(=O)(=O)\C=C\C#N
14030	289	-19.7013	TRUE	TRUE	FALSE	BRONOPOL	antiinfective	OCC(Br)(CO)[N+]([O-])=O
TM-L4	54	-19.569	TRUE	TRUE	FALSE	LDK378	Ceritinib (LDK378) is a specific ALK inhibitor (IC50: 0.2 nM).	CC(C)Oc1cc(C2CCNCC2)c(C)cc1Nc1ncc(Cl)c(Nc2ccccc2S(=O)(=O)C(C)C)n1
L1200	327	-19.2701	TRUE	TRUE	FALSE	BGT226 (NVP-BGT226)	NVP-BGT226 is a novel class I PI3K/mTOR inhibitor for PI3Kα/β/γ with IC50 of 4 nM/63 nM/38 nM. Phase 1/2.	C(/C=C\C(=O)O)(=O)O.N1=CC2=C(C3=CC(=CC=C13)C4C=NC(=CC=4)OC)N(C(N2C)=O)C5C=C(C(=CC=5)N6CCNCC6)C(F)(F)F
L1200	53	-19.2701	TRUE	TRUE	FALSE	Dovitinib (TKI-258) Dilactic Acid	Dovitinib Dilactic acid (TKI258 Dilactic acid) is the Dilactic acid of Dovitinib, which is a multitargeted RTK inhibitor, mostly for class III (FLT3/c-Kit) with IC50 of 1 nM/2 nM, also potent to class IV (FGFR1/3) and class V (VEGFR1-4) RTKs with IC50 of 8-13 nM, less potent to InsR, EGFR, c-Met, EphA2, Tie2, IGFR1 and HER2. Phase 4.	N1(C(C(=C(C2C(=CC=CC1=2)F)N)C3=NC4C(N3)=CC(=CC=4)N5CCN(CC5)C)=O).CC(C(O)=O)O.CC(C(O)=O)O
L1200	29	-19.2701	TRUE	TRUE	FALSE	Fingolimod (FTY720) HCl	Fingolimod (FTY720) is a S1P antagonist with IC50 of 0.033 nM.	C1(=CC=C(C=C1)CCCCCCCC)CCC(CO)(N)CO.Cl
LOPAC	180	-18.8618	TRUE	TRUE	FALSE	PD173952	PD173952 is a Src family kinase inhibitor.	CN1C(=O)C(=CC2=C1N=C(NC1=CC=C(C=C1)N1CCOCC1)N=C2)C1=C(Cl)C=CC=C1Cl
L1200	120	-18.6154	TRUE	TRUE	FALSE	MK-2206 2HCl	MK-2206 2HCl is a highly selective inhibitor of Akt1/2/3 with IC50 of 8 nM/12 nM/65 nM, respectively; no inhibitory activities against 250 other protein kinases observed. Phase 2.	C1(=CC=CC=C1)C2(=C(N=C3C(=C2)C4N(C=C3)C(NN=4)=O)C5=CC=C(C=C5)C6(CCC6)N).Cl.Cl
14030	11	-18.362	TRUE	TRUE	FALSE	TRIFLUPROMAZINE HYDROCHLORIDE	antipsychotic	Cl.CN(C)CCCN1C2=C(SC3=C1C=C(C=C3)C(F)(F)F)C=CC=C2
L1900	61	-18.2432	TRUE	TRUE	FALSE	CUDC-907	CUDC-907 is a dual PI3K and HDAC inhibitor for PI3Kα and HDAC1/2/3/10 with IC50 of 19 nM and 1.7 nM/5 nM/1.8 nM/2.8 nM, respectively. Phase 1.	C1=NC(=NC=C1C(NO)=O)N(C)CC2=CC3=C(S2)C(=NC(=N3)C4=CC=C(N=C4)OC)N5CCOCC5
L1200	43	-18.138	TRUE	TRUE	FALSE	GZD824	GZD824 is a novel orally bioavailable Bcr-Abl inhibitor for Bcr-Abl(WT) and Bcr-Abl(T315I) with IC50 of 0.34 nM and 0.68 nM, respectively.	C1(=CC(=CC(=C1C)C#CC2=CC3=C(N=C2)NN=C3)C(NC4=CC(=C(C=C4)CN5CCN(CC5)C)C(F)(F)F)=O).CS(=O)(=O)O.CS(=O)(=O)O
L2300	156	-17.9542	TRUE	TRUE	FALSE	PF 477736		C1C(CCCC1)[C@@H](N)C(=O)NC2=CC3=C4C(=C2)C(NN=CC(=C(N3)C5C=NN(C=5)C)4)=O
L1200	47	-17.8014	TRUE	TRUE	FALSE	EHop-016	EHop-016 is a specific Rac GTPase inhibitor with IC50 of 1.1 μM for Rac1, equally potent inhibition for Rac3.	C1(N=C(C=CN=1)NC2C=CC3N(C4C=CC=CC(C(C=2)=3)=4)CC)NCCCN5CCOCC5
L1900	400	-17.6107	TRUE	TRUE	FALSE	NVP-BSK805 2HCl	NVP-BSK805 is a potent and selective ATP-competitive JAK2 inhibitor with IC50 of 0.5 nM,>20-fold selectivity towards JAK1, JAK3 and TYK2.	C1(=CC=C2C(=C1C3=CC(=C(C(=C3)F)CN4CCOCC4)F)N=C(C=N2)C5=CN(N=C5)C6CCNCC6).Cl.Cl
pfizer	44	-17.5899	TRUE	TRUE	FALSE	PD173952	Tyrosine Kinase	CN1C(=O)C(=CC2=C1N=C(NC1=CC=C(C=C1)N1CCOCC1)N=C2)C1=C(Cl)C=CC=C1Cl
14030	99	-17.169	TRUE	TRUE	FALSE	AURIN TRICARBOXYLIC ACID	endonuclease inhibitor; apoptosis inhibitor, topoisomerase II inhibitor	OC(=O)C1=CC(=CC=C1O)C(C1=CC=C(O)C(=C1)C(O)=O)=C1C=CC(=O)C(=C1)C(O)=O
TM-L4	70	-17.0581	TRUE	TRUE	FALSE	(S)-crizotinib	(S)-crizotinib（IC50 of 72 nM）, an effective MTH1 (NUDT1) inhibitor, is the (S)-enantiomer of crizotinib.	C[C@@H](c1c(ccc(c1Cl)F)Cl)Oc1c(ncc(c1)c1cn(nc1)C1CCNCC1)N
TM-L4	21	-15.9701	TRUE	TRUE	FALSE	Fingolimod hydrochloride	Fingolimod, a novel immune modulator, is a sphingosine 1-phosphate (S1P) antagonist (IC50: 0.033 nM in K562 and NK cells).	Cl.CCCCCCCCc1ccc(CCC(N)(CO)CO)cc1
L1200	59	-15.8738	TRUE	TRUE	FALSE	IKK-16 (IKK Inhibitor VII)	IKK 16 is a selective IκB kinase (IKK) inhibitor for IKK-2, IKK complex and IKK-1 with IC50 of 40 nM, 70 nM and 200 nM, respectively.	C1(C=CC(=CC=1)NC2N=C(C=CN=2)C3=CC4C(S3)=CC=CC=4)C(=O)N5CCC(CC5)N6CCCC6
pfizer	252	-15.8594	TRUE	TRUE	FALSE	PD-161570	Tyrosine Kinase	CCN(CC)CCCCNC1=NC2=NC(NC(=O)NC(C)(C)C)=C(C=C2C=N1)C1=C(Cl)C=CC=C1Cl
pfizer	60	-15.5698	TRUE	TRUE	FALSE	PD-166285	Tyrosine Kinase	O.Cl.Cl.CCN(CC)CCOC1=CC=C(NC2=NC3=C(C=N2)C=C(C(=O)N3C)C2=C(Cl)C=CC=C2Cl)C=C1
LOPAC	630	-15.2321	TRUE	TRUE	FALSE	Thapsigargin	Potent, cell-permeable, IP3-independent intracellular calcium releaser	CCCCCCCC(=O)O[C@@H]1[C@@H](OC(=O)C(\C)=C/C)C(C)=C2[C@@H]3OC(=O)[C@@](C)(O)[C@@]3(O)[C@H](C[C@](C)(OC(C)=O)[C@@H]12)OC(=O)CCC
L1200	306	-15.2207	TRUE	TRUE	FALSE	LY2784544	LY2784544 is a potent JAK2 inhibitor with IC50 of 3 nM, effective in JAK2V617F, 8- and 20-fold selective versus JAK1 and JAK3. Phase 2.	C1C(=NN2C(C=1CN3CCOCC3)=NC(=C2CC4=CC=C(C=C4F)Cl)C)NC5NN=C(C=5)C
LOPAC	142	-15.2119	TRUE	TRUE	FALSE	Wiskostatin	Wiskostatin is a selective inhibitor of N-WASP, a ubiquitously expressed member of the Wiskott-Aldrich Syndrome protein (WASp) family that regulates actin polymerization	CN(C)CC(O)CN1C2=C(C=C(Br)C=C2)C2=C1C=CC(Br)=C2
TM-L4	39	-15.0946	TRUE	TRUE	FALSE	Gramicidin	A group of peptide antibiotics from BACILLUS brevis. Gramicidin C or S is a cyclic, ten-amino acid polypeptide and gramicidins A, B, D are linear. Gramicidin is one of the two principal components of TYROTHRICIN.	C[C@@H](C(=O)N[C@H](CC(C)C)C(=O)N[C@@H](C)C(=O)N[C@H](C(C)C)C(=O)N[C@@H](C(C)C)C(=O)N[C@@H](C(C)C)C(=O)N[C@@H](CC1=CNC2=CC=CC=C21)C(=O)N[C@H](CC(C)C)C(=O)N[C@@H](CC3=CNC4=CC=CC=C43)C(=O)N[C@H](CC(C)C)C(=O)N[C@@H](CC5=CNC6=CC=CC=C65)C(=O)N[C@H](CC(C)C)C(=O)N[C@@H](CC7=CNC8=CC=CC=C87)C(=O)NCCO)NC(=O)CNC(=O)[C@H](C(C)C)NC=O
L1200	225	-14.7899	TRUE	TRUE	FALSE	AZ 960	AZ 960 is a novel ATP competitive JAK2 inhibitor with IC50 and Ki of <3 nM and 0.45 nM, 3-fold selectivity of AZ960 for JAK2 over JAK3.	C1=C(C(=NC(=C1F)NC2C=C(NN=2)C)N[C@H](C3=CC=C(C=C3)F)C)C#N
LOPAC	435	-14.7655	TRUE	TRUE	FALSE	Fluphenazine dihydrochloride	Dopamine receptor antagonist; antipsychotic	Cl.Cl.OCCN1CCN(CCCN2C3=C(SC4=C2C=C(C=C4)C(F)(F)F)C=CC=C3)CC1
TM-L4	26	-14.4813	TRUE	TRUE	FALSE	Mefloquine hydrochloride	Mefloquine is a quinoline derivative used for the prevention and therapy of P. falciparum malaria.	[C@@H](O)([C@@H]1NCCCC1)c1cc(nc2c1cccc2C(F)(F)F)C(F)(F)F.Cl
TM-L4	184	-14.4813	TRUE	TRUE	FALSE	Tegaserod maleate	Tegaserod is a 5-HT4 agonist manufactured by Novartis and used for the management of irritable bowel syndrome and constipation. Its use was the only drug approved by the United States Food and Drug Administration to help relieve the abdominal discomfort, bloating and constipation associated with irritable bowel syndrome. On March 30, 2007, the U.S. Food and Drug Administration requested that Nova…	OC(=O)\C=C/C(O)=O.CCCCCNC(=N)N\N=C\c1c[nH]c2ccc(OC)cc12
L1200	60	-14.4754	TRUE	TRUE	FALSE	SGI-1776 free base	SGI-1776 is a novel ATP competitive inhibitor of Pim1 with IC50 of 7 nM, 50- and 10-fold selective versus Pim2 and Pim3, also potent to Flt3 and haspin. Phase 1.	C1C(=NN2C(C=1)=NC=C2C3=CC=CC(=C3)OC(F)(F)F)NCC4CCN(CC4)C
TM-L4	74	-14.4717	TRUE	TRUE	FALSE	Pimavanserin tartrate	Pimavanserin is an effective and specific serotonin 5-HT2A inverse agonist (pIC50: 8.73), used in the therapy of psychosis associated with Parkinson’s disease.	O[C@H]([C@@H](O)C(O)=O)C(O)=O.CC(C)COc1ccc(CNC(=O)N(Cc2ccc(F)cc2)C2CCN(C)CC2)cc1.CC(C)COc1ccc(CNC(=O)N(Cc2ccc(F)cc2)C2CCN(C)CC2)cc1
TM-L4	575	-14.3184	TRUE	TRUE	FALSE	Chlorhexidine	Chlorhexidine is a biguanide compound used as an antiseptic agent with topical antibacterial activity. Chlorhexidine is positively charged and reacts with the negatively charged microbial cell surface, thereby destroying the integrity of the cell membrane. Subsequently, chlorhexidine penetrates into the cell and causes leakage of intracellular components leading to cell death. Since gram-positive…	c1(NC(=N)NC(=N)NCCCCCCNC(=N)NC(=N)Nc2ccc(cc2)Cl)ccc(cc1)Cl
14030	60	-14.2789	TRUE	TRUE	FALSE	SENNOSIDE A	cathartic	OC[C@H]1O[C@H](OC2=C3C(=O)C4=C(C=C(C=C4O)C(O)=O)[C@@H]([C@@H]4C5=CC=CC(O[C@H]6O[C@H](CO)[C@@H](O)[C@H](O)[C@H]6O)=C5C(=O)C5=C4C=C(C=C5O)C(O)=O)C3=CC=C2)[C@H](O)[C@@H](O)[C@@H]1O
L1900	46	-14.2568	TRUE	TRUE	FALSE	Droxinostat	Droxinostat (CMH, 5809354) is a selective inhibitor of HDAC, mostly for HDACs 6 and 8 with IC50 of 2.47μM and 1.46 μM, greater than 8-fold selective against HDAC3 and no inhibition to HDAC1, 2, 4, 5, 7, 9, and 10.	C1=C(C=C(C(=C1)OCCCC(NO)=O)C)Cl
TM-L4	150	-14.1328	TRUE	TRUE	FALSE	Entrectinib	Entrectinib is an inhibitor of TrkA (IC50: 1.7 nM), TrkB (IC50: 0.1 nM), and TrkC (IC50: 0.1 nM), as well as anaplastic lymphoma kinase (ALK; IC50: 1.6 nM) and C-ros oncogene 1 (ROS1; IC50: 0.2 nM). Entrectinib blocks proliferation of ALK-dependent cell lines, including those with C1156Y or L1196M resistance mutations, and inhibits ALK‐dependent signaling. It has been shown to inhibit the growth …	CN1CCN(CC1)c1cc(c(cc1)C(=O)Nc1n[nH]c2c1cc(cc2)Cc1cc(cc(c1)F)F)NC1CCOCC1
TM-L4	273	-14.0775	TRUE	TRUE	FALSE	Mitoxantrone hydrochloride	Mitoxantrone Hydrochloride is the hydrochloride salt of an anthracenedione antibiotic with antineoplastic activity. It is a type II topoisomerase inhibitor.	Cl.OCCNCCNc1c2C(=O)c3c(O)ccc(O)c3C(=O)c2c(NCCNCCO)cc1.Cl
TM-L4	210	-14.0606	TRUE	TRUE	FALSE	Crystal Violet	Crystal violet is a triarylmethane dye that is a mixture of violet rosanilinis, with antibacterial, antifungal, and anthelmintic properties.	[Cl-].CN(C)c1ccc(cc1)C(\c1ccc(cc1)N(C)C)=C1\C=C/C(/C=C\1)=[N+](/C)C
TM-L4	98	-14.0491	TRUE	TRUE	FALSE	Vandetanib	Vandetanib is a potent inhibitor of VEGFR2 (IC50: 40 nM). It also inhibits VEGFR3 and EGFR.	COc1cc2c(Nc3ccc(Br)cc3F)ncnc2cc1OCC1CCN(C)CC1
LOPAC	82	-14.0245	TRUE	TRUE	FALSE	Bromoacetyl alprenolol menthane	Alkylating beta adrenoceptor antagonist	CC(C)(NC(=O)CBr)[C@H]1CCC[C@](C)(C1)NCC(O)COC1=CC=CC=C1CC=C
L1200	220	-13.9426	TRUE	TRUE	FALSE	PHA-680632	PHA-680632 is potent inhibitor of Aurora A, Aurora B and Aurora C with IC50 of 27 nM, 135 nM and 120 nM, respectively. It has 10- to 200-fold higher IC50 for FGFR1, FLT3, LCK, PLK1, STLK2, and VEGFR2/3.	C1(=CC=C(C=C1)C(=O)NC2C3=C(NN=2)CN(C3)C(=O)NC4=C(C=CC=C4CC)CC)N5CCN(CC5)C
L1200	155	-13.8733	TRUE	TRUE	FALSE	Ibrutinib (PCI-32765)	Ibrutinib is a potent and highly selective Btk inhibitor with IC50 of 0.5 nM, modestly potent to Bmx, CSK, FGR, BRK, HCK, less potent to EGFR, Yes, ErbB2, JAK3, etc.	C1=NC(=C2C(=N1)N(N=C2C3=CC=C(C=C3)OC4=CC=CC=C4)[C@H]5CN(CCC5)C(C=C)=O)N
TM-L4	81	-13.8235	TRUE	TRUE	FALSE	Pimavanserin	Pimavanserin(ACP-103) is an effective and specific 5-HT2A receptor inverse agonist (mean pIC50: 8.7, in the cell-based functional assay). Pimavanserin is an atypical antipsychotic used in the treatment of hallucinations and psychosis in patients with Parkinson disease.	CC(C)COc1ccc(CNC(=O)N(Cc2ccc(F)cc2)C2CCN(C)CC2)cc1
TM-L4	59	-13.7786	TRUE	TRUE	FALSE	Dronedarone hydrochloride	Dronedarone hydrochloride is an amiodarone analog which has an effective and promising treatment for Atrial fibrillation.	Cl.CS(=O)(=O)Nc1cc2c(c(oc2cc1)CCCC)C(=O)c1ccc(cc1)OCCCN(CCCC)CCCC
TM-L4	242	-13.7611	TRUE	TRUE	FALSE	Travoprost	Travoprost is used to treat glaucoma and ocular hypertension,is a potent and selective FP prostaglandin receptor agonist.	CC(C)OC(=O)CCC\C=C/CC1C(O)CC(O)C1\C=C\C(O)COc1cccc(c1)C(F)(F)F
TM-L4	47	-13.7576	TRUE	TRUE	FALSE	Bazedoxifene acetate	Bazedoxifene acetate is a novel selective estrogen receptor modulator (SERM).	C(=O)(C)O.c1c(cc2c(c1)n(c(c2C)c1ccc(cc1)O)Cc1ccc(cc1)OCCN1CCCCCC1)O
L1200	89	-13.6967	TRUE	TRUE	FALSE	WZ3146	WZ3146 is a mutant-selective irreversible inhibitor of EGFR(L858R) and EGFR(E746_A750) with IC50 of 2 nM and 2 nM; does not inhibit ERBB2 phosphorylation (T798I).	C1(=CC=C(C=C1)NC2=NC=C(C(=N2)OC3=CC(=CC=C3)NC(C=C)=O)Cl)N4CCN(CC4)C
L1200	57	-13.631	TRUE	TRUE	FALSE	BI 2536	BI2536 is a potent Plk1 inhibitor with IC50 of 0.83 nM. It shows 4- and 11-fold greater selectivity against Plk2 and Plk3. Phase 2.	C1(=CC=C(C(=C1)OC)NC2=NC=C3C(=N2)N([C@@H](C(N3C)=O)CC)C4CCCC4)C(NC5CCN(CC5)C)=O
TM-L4	613	-13.5722	TRUE	TRUE	FALSE	Siponimod	BAF312 (Siponimod), a next-generation S1P receptor modulator, is specific for S1P1 and S1P5 receptors with EC50 of 0.39 nM and 0.98 nM, respectively. The specificity of BAF312 for S1P1 and S1P5 receptors exhibits >1000-fold over S1P2, S1P3 and S1P4 receptors.	CCc1cc(ccc1CN1CC(C1)C(O)=O)C(\C)=N\OCc1ccc(C2CCCCC2)c(c1)C(F)(F)F
TM-L4	197	-13.5495	TRUE	TRUE	FALSE	Mitoxantrone	Mitoxantrone is an anthracenedione antibiotic with antineoplastic activity. Mitoxantrone intercalates into and crosslinks DNA, thereby disrupting DNA and RNA replication. This agent also binds to topoisomerase II, resulting in DNA strand breaks and inhibition of DNA repair. Mitoxantrone is less cardiotoxic compared to doxorubicin.	OCCNCCNc1ccc(NCCNCCO)c2c1C(=O)c1c(O)ccc(O)c1C2=O
14030	300	-13.5153	TRUE	TRUE	FALSE	CETRIMONIUM BROMIDE	antiinfectant	[Br-].CCCCCCCCCCCCCCCC[N+](C)(C)C
TM-L4	88	-13.4437	TRUE	TRUE	FALSE	Crizotinib	Crizotinib is an ATP-competitive small-molecule tyrosine kinases inhibitor of c-MET (IC50: 8 nM) and ALK (IC50: 20 nM) receptor.	C[C@@H](Oc1cc(cnc1N)-c1cnn(c1)C1CCNCC1)c1c(Cl)ccc(F)c1Cl
14030	240	-13.3535	TRUE	TRUE	FALSE	PERHEXILINE MALEATE	coronary vasodilator	OC(=O)\C=C/C(O)=O.C(C(C1CCCCC1)C1CCCCC1)C1CCCCN1
L1900	208	-13.3231	TRUE	TRUE	FALSE	JNJ-7706621	JNJ-7706621 is pan-CDK inhibitor with the highest potency on CDK1/2 with IC50 of 9 nM/4 nM and showing >6-fold selectivity for CDK1/2 than CDK3/4/6. It also potently inhibits Aurora A/B and has no activity on Plk1 and Wee1.	C1(=CC=C(C=C1)NC2N=C(N(N=2)C(C3=C(C=CC=C3F)F)=O)N)S(N)(=O)=O
L1200	513	-13.2689	TRUE	TRUE	FALSE	PF-477736	PF-477736 is a selective, potent and ATP-competitive Chk1 inhibitor with Ki of 0.49 nM and also inhibits VEGFR2, Aurora-A, FGFR3, Flt3, Fms (CSF1R), Ret and Yes. It shows ~100-fold selectivity for Chk1 than Chk2. Phase 1.	C1=C(C=C2C3=C1C(NN=CC(=C(N2)C4C=NN(C=4)C)3)=O)NC([C@@H](C5CCCCC5)N)=O
pfizer	15	-13.171	TRUE	TRUE	FALSE	Crizotinib	Tyrosine Kinase	C[C@@H](OC1=C(N)N=CC(=C1)C1=CN(N=C1)C1CCNCC1)C1=C(Cl)C(F)=CC=C1Cl
L1200	323	-13.0457	TRUE	TRUE	FALSE	SNS-314 Mesylate	SNS-314 Mesylate is a potent and selective inhibitor of Aurora A, Aurora B and Aurora C with IC50 of 9 nM, 31 nM, and 3 nM, respectively. It is less potent to Trk A/B, Flt4, Fms, Axl, c-Raf and DDR2. Phase 1.	C12(=C(N=CN=C1NCCC3SC(=NC=3)NC(NC4=CC(=CC=C4)Cl)=O)C=CS2).CS(=O)(=O)O
L1200	390	-12.9659	TRUE	TRUE	FALSE	TWS119	TWS119 is a GSK-3β inhibitor with IC50 of 30 nM; capable of inducing neuronal differentiation and may be useful to stem cell biology.	C1=CC=C(C=C1O)OC2=NC=NC3=C2C=C(N3)C4=CC=CC(=C4)N
TM-L4	243	-12.9444	TRUE	TRUE	FALSE	Romidepsin	Romidepsin is an intravenously administered histone deacetylase inhibitor and antineoplastic agent that is approved for use in refractory or relapsed cutaneous and peripheral T cell lymphomas.	C\C=C1/NC(=O)[C@H]2CSSCC\C=C\[C@H](CC(=O)N[C@H](C(C)C)C(=O)N2)OC(=O)[C@@H](NC1=O)C(C)C
LOPAC	80	-12.8623	TRUE	TRUE	FALSE	Calmidazolium chloride	Potent inhibitor of calmodulin activation of phosphodiesterase; stronglyinhibits calmodulin-dependent Ca2+-ATPase	[Cl-].ClC1=CC=C(C=C1)C(C1=CC=C(Cl)C=C1)[N+]1=CN(CC(OCC2=C(Cl)C=C(Cl)C=C2)C2=C(Cl)C=C(Cl)C=C2)C=C1
TM-L4	91	-12.8372	TRUE	TRUE	FALSE	Vortioxetine	Vortioxetine is a serotonergic antidepressant used for major depression disorders. Vortioxetine has been associated with a low rate of minor serum aminotransferase elevations during treatment.	Cc1cc(C)c(Sc2ccccc2N2CCNCC2)cc1
TM-L4	173	-12.7521	TRUE	TRUE	FALSE	Auranofin	Auranofin is an antirheumatic agent, is used to treat rheumatoid arthritis, improves arthritis symptoms including painful or tender and swollen joints and morning stiffness.	[Au+].CCP(CC)CC.CC(=O)OC[C@H]1O[C@@H]([S-])[C@H](OC(C)=O)[C@@H](OC(C)=O)[C@@H]1OC(C)=O
L1200	353	-12.7355	TRUE	TRUE	FALSE	GSK1070916	GSK1070916 is a reversible and ATP-competitive inhibitor of Aurora B/C with IC50 of 3.5 nM/6.5 nM. It displays >100-fold selectivity against the closely related Aurora A-TPX2 complex. Phase 1.	C1=CN=C2C(=C1C3=CN(N=C3C4=CC=C(C=C4)NC(N(C)C)=O)CC)C=C(N2)C5=CC=CC(=C5)CN(C)C
TM-L4	125	-12.7165	TRUE	TRUE	FALSE	Osimertinib	Osimertinib is a small molecule tyrosine kinase receptor inhibitor and antineoplastic agent that is used in the therapy of selected forms of advanced non-small cell lung cancer (NSCLC).	c1cnc(nc1c1cn(c2c1cccc2)C)Nc1c(cc(c(c1)NC(=O)C=C)N(CCN(C)C)C)OC
LOPAC	404	-12.672	TRUE	TRUE	FALSE	Vinblastine sulfate salt	Inhibitor of microtubule assembly	OS(O)(=O)=O.CCC1(O)CC2CN(C1)CCC1=C(NC3=CC=CC=C13)[C@@](C2)(C(=O)OC)C1=C(OC)C=C2N(C)C3[C@]4(CCN5CC=C[C@](CC)([C@@H]45)[C@@H](OC(C)=O)[C@]3(O)C(=O)OC)C2=C1
TM-L4	503	-12.524	TRUE	TRUE	FALSE	Sorafenib	Sorafenib is a potent multikinase inhibitor (IC50s: 6/20/22 nM for Raf-1/VEGFR-4/B-Raf).	CNC(=O)c1cc(Oc2ccc(NC(=O)Nc3ccc(Cl)c(c3)C(F)(F)F)cc2)ccn1
L1200	143	-12.4223	TRUE	TRUE	FALSE	PRT062607 (P505-15, BIIB057) HCl	PRT062607 (P505-15) HCl is a novel, highly selective Syk inhibitor with IC50 of 1 nM, >80-fold selective for Syk than Fgr, Lyn, FAK, Pyk2 and Zap70.	N1(=C(N=C(C(=C1)C(N)=O)NC2=CC(=CC=C2)N3N=CC=N3)N[C@@H]4CCCC[C@H]4N).Cl
LOPAC	63	-12.3735	TRUE	TRUE	FALSE	Bay 11-7085	Inhibits cytokine induced IkB (Inhibitor of NFkB) phosphorylation	CC(C)(C)C1=CC=C(C=C1)S(=O)(=O)\C=C\C#N
TM-L4	27	-12.3392	TRUE	TRUE	FALSE	Ponatinib	Ponatinib is an orally available, multitargeted kinase inhibitor (IC50s: 0.37/1.1/1.5/2.2/5.4 nM for Abl, PDGFRα, VEGFR2, FGFR1, and Src, respectively).	CN1CCN(Cc2ccc(NC(=O)c3ccc(C)c(c3)C#Cc3cnc4cccnn34)cc2C(F)(F)F)CC1
L1900	138	-12.2508	TRUE	TRUE	FALSE	I-BET151 (GSK1210151A)	I-BET151 (GSK1210151A) is a novel selective BET inhibitor for BRD2, BRD3 and BRD4 with IC50 of 0.5 μM, 0.25 μM, and 0.79 μM, respectively.	C1(=C(C=C2C(=C1)C3=C(C=N2)NC(N3[C@H](C)C4=CC=CC=N4)=O)C5=C(ON=C5C)C)OC
TM-L4	45	-12.2155	TRUE	TRUE	FALSE	Vortioxetine HBr	Vortioxetine (Lu AA21004) is a serotonin (5-HT) modulator and stimulator (SMS), inhibits 5-HT1A/1B/3A/7 receptor and SERT (IC50: 15/33/3.7/19/1.6 nM).	c1c(c(cc(c1)C)C)Sc1ccccc1N1CCNCC1.Br
L1900	326	-12.2115	TRUE	TRUE	FALSE	SHAM CONTROL	SHAM CONTROL	SHAM CONTROL
LOPAC	267	-12.206	TRUE	TRUE	FALSE	Reactive Blue 2	P2Y receptor antagonist; most potent antagonist for ATP-activated channels	[Na+].[Na+].[Na+].NC1=C(C=C(NC2=CC(=C(NC3=NC(NC4=CC=C(C=C4)S([O-])(=O)=O)=NC(Cl)=N3)C=C2)S([O-])(=O)=O)C2=C1C(=O)C1=CC=CC=C1C2=O)S([O-])(=O)=O
L1200	405	-12.1723	TRUE	TRUE	FALSE	Masitinib (AB1010)	Masitinib is a novel inhibitor for Kit and PDGFRα/β with IC50 of 200 nM and 540 nM/800 nM, weak inhibition to ABL and c-Fms. Phase 2/3.	C1(=C(C=C(C=C1)NC(=O)C2=CC=C(C=C2)CN3CCN(CC3)C)NC4=NC(=CS4)C5=CC=CN=C5)C
14030	334	-12.1715	TRUE	TRUE	FALSE	CHLORANIL	antipsoriatic	ClC1=C(Cl)C(=O)C(Cl)=C(Cl)C1=O
L1200	97	-12.1379	TRUE	TRUE	FALSE	AZD3463	AZD3463 is a novel orally bioavailable ALK inhibitor with Ki of 0.75 nM, which also inhibits IGF1R with equivalent potency.	C12=C(C=CC=C1)C(=CN2)C3=C(C=NC(=N3)NC4=C(C=C(C=C4)N5CCC(CC5)N)OC)Cl
TM-L4	108	-12.135	TRUE	TRUE	FALSE	Osimertinib mesylate	Osimertinib (AZD-9291) is an irreversible and mutant selective EGFR inhibitor (IC50s: 12/1 nM for EGFR(L858R) and EGFR(L858R/T790M)).	CS(O)(=O)=O.COc1cc(N(C)CCN(C)C)c(NC(=O)C=C)cc1Nc1nccc(n1)-c1cn(C)c2ccccc12
LOPAC	288	-12.1123	TRUE	TRUE	FALSE	BIX 01294 trihydrochloride hydrate	Selective histone methyl transferase inhibitor.	Cl.Cl.Cl.COC1=C(OC)C=C2C(NC3CCN(CC4=CC=CC=C4)CC3)=NC(=NC2=C1)N1CCCN(C)CC1
L1200	157	-12.0972	TRUE	TRUE	FALSE	BAY 11-7082	BAY 11-7082 is a NF-κB inhibitor, inhibits TNFα-induced IκBα phosphorylation with IC50 of 10 μM.	C1(S(/C=C/C#N)(=O)=O)C=CC(=CC=1)C
TM-L4	157	-12.0651	TRUE	TRUE	FALSE	Dasatinib	Dasatinib is a potent inhibitor of the Bcr-Abl and Src family (IC50s: 0.6, 0.8, 79 and 37 nM for Abl, Src, c-Kit, and c-KitD816V, respectively).	Cc1nc(Nc2ncc(s2)C(=O)Nc2c(C)cccc2Cl)cc(n1)N1CCN(CCO)CC1
TM-L4	52	-12.0239	TRUE	TRUE	FALSE	Nonoxynol	Nonoxynol-9 (N-9) is a typical surfactant used as a vaginal spermicide. Spermicides are locally acting non-hormonal contraceptives. When present in the vagina during intercourse, they immobilize/inactivate/damage and/or kill sperms without eliciting systemic effects. N-9 has been in use for more than 30 years as an over-the-counter (OTC) drug in creams, gels, foams and condom lubricants. It is th…	CCCCCCCCCC1=CC=C(OCCO)C=C1
L1200	470	-11.982	TRUE	TRUE	FALSE	AST-1306	AST-1306 is a novel irreversible inhibitor of EGFR and ErbB2 with IC50 of 0.5 nM and 3 nM, also effective in mutation EGFR T790M/L858R, more potent to ErbB2-overexpressing cells, 3000-fold selective for ErbB family than other kinases,	C(C=C)(=O)NC1(=CC2=C(N=CN=C(C=C1)2)NC3C=C(C(=CC=3)OCC4C=C(C=CC=4)F)Cl).C5=CC(=CC=C5S(O)(=O)=O)C
14030	391	-11.9321	TRUE	TRUE	FALSE	BENZALKONIUM CHLORIDE	antiinfective (topical)	[Cl-].CCCCCCCCCCCCC[N+](C)(C)CC1=CC=CC=C1
L1200	335	-11.7872	TRUE	TRUE	FALSE	AVL-292	AVL-292 is a covalent, orally active, and highly selective BTK inhibitor with IC50 of <0.5 nM, displaying at least 1400-fold selectivity over the other kinases assayed. Phase 1.	C1(=CN=C(N=C1NC2=CC(=CC=C2)NC(C=C)=O)NC3=CC=C(C=C3)OCCOC)F
TM-L4	468	-11.7578	TRUE	TRUE	FALSE	Rilpivirine	Rilpivirine is a diarylpyrimidine derivative and reverse transcriptase inhibitor with antiviral activity against HIV-1 that is used in the treatment of HIV infections.	Cc1cc(\C=C\C#N)cc(C)c1Nc1ccnc(Nc2ccc(cc2)C#N)n1
LOPAC	183	-11.6552	TRUE	TRUE	FALSE	PD-166285 hydrate	PD-166285 hydrate is a broad spectrum protein tyrosine kinase inhibitor; Src and FGFR kinase inhibitor	O.Cl.Cl.CCN(CC)CCOC1=CC=C(NC2=NC3=C(C=N2)C=C(C(=O)N3C)C2=C(Cl)C=CC=C2Cl)C=C1
L2300	22	-11.5389	TRUE	TRUE	FALSE	PD 166285		C1(N=C2C(=CN=1)C=C(C(N2C)=O)C3C(=CC=CC=3Cl)Cl)NC4(C=CC(=CC=4)OCCN(CC)CC).Cl.Cl
TM-L4	580	-11.4133	TRUE	TRUE	FALSE	Ivacaftor	Ivacaftor (VX-770) is a potentiator of CFTR targeting G551D-CFTR (EC50: 100 nM) and F508del-CFTR (EC50: 25 nM) in Fisher rat thyroid cells, respectively.	CC(C)(C)c1cc(c(NC(=O)c2c[nH]c3ccccc3c2=O)cc1O)C(C)(C)C
TM-L4	13	-11.4103	TRUE	TRUE	FALSE	Bosutinib	Bosutinib is a synthetic quinolone derivative and dual kinase inhibitor that targets both Abl (IC50: 1 nM) and Src (IC50: 1.2 nM) kinases.	COc1cc(Nc2c(cnc3cc(OCCCN4CCN(C)CC4)c(OC)cc23)C#N)c(Cl)cc1Cl
L2300	11	-11.3804	TRUE	TRUE	FALSE	SB 743921	SB 743921 is a KSP inhibitor with IC50 of 0.2 nM, 0.07 nM, 1.7 nM, 0.06 nM and 14.4 nM in SKOV3, Colo205, MV522, MX1 and P388 cell lines, respectively.	C1(=CC(=CC=C1)CC2C(C3=C(OC=2[C@H](N(C(=O)C4=CC=C(C=C4)C)CCCN)C(C)C)C=C(C=C3)Cl)=O).Cl
L1900	572	-11.3469	TRUE	TRUE	FALSE	MK-5108 (VX-689)	MK-5108 (VX-689) is a highly selective Aurora A inhibitor with IC50 of 0.064 nM and is 220- and 190-fold more selective for Aurora A than Aurora B/C, while it inhibits TrkA with less than 100-fold selectivity. Phase 1.	N1=C(C=CC=C1C[C@]2(CC[C@H](CC2)OC3=C(C(=CC=C3)Cl)F)C(=O)O)NC4SC=CN=4
L2300	393	-11.2885	TRUE	TRUE	FALSE	LDN193189	LDN193189 is a selective inhibitor of ALK2 and ALK3 with IC50 of 5 nM and 30 nM, respectively.	C1(=CC=C(C=C1)C2C=NC3N(C=2)N=CC=3C4=CC=NC5=C4C=CC=C5)N6CCNCC6
L1200	255	-11.2426	TRUE	TRUE	FALSE	Dasatinib	Dasatinib is a novel, potent and multi-targeted inhibitor that targets Abl, Src and c-Kit, with IC50 of ＜1 nM, 0.8 nM and 79 nM, respectively.	N1=C(N=C(C=C1NC2=NC=C(S2)C(NC3=C(C=CC=C3C)Cl)=O)N4CCN(CC4)CCO)C
TM-L4	263	-11.2274	TRUE	TRUE	FALSE	Cabozantinib	Cabozantinib (XL184) is a potent pan-tyrosine kinases inhibitor that inhibits VEGFR2, c-Met, Kit, Axl, and Flt3 (IC50s: 0.035, 1.3, 4.6, 7 and 11.3 nM).	COc1cc2nccc(Oc3ccc(NC(=O)C4(CC4)C(=O)Nc4ccc(F)cc4)cc3)c2cc1OC
L2300	103	-11.13	TRUE	TRUE	FALSE	Fingolimod (FTY720)	FTY720 (Fingolimod, Gilenya) is a S1P antagonist with IC50 of 0.033 nM.	C1(=CC=C(C=C1)CCCCCCCC)CCC(CO)(N)CO.Cl
LOPAC	118	-11.0868	TRUE	TRUE	FALSE	Cantharidin	Protein phosphatase 2A inhibitor	CC12C3CCC(O3)C1(C)C(=O)OC2=O
L1900	251	-11.062	TRUE	TRUE	FALSE	SNS-314 Mesylate	SNS-314 Mesylate is a potent and selective inhibitor of Aurora A, Aurora B and Aurora C with IC50 of 9 nM, 31 nM, and 3 nM, respectively. It is less potent to Trk A/B, Flt4, Fms, Axl, c-Raf and DDR2. Phase 1.	C12(=C(N=CN=C1NCCC3SC(=NC=3)NC(NC4=CC(=CC=C4)Cl)=O)C=CS2).CS(=O)(=O)O
TM-L4	178	-11.0149	TRUE	TRUE	FALSE	Colchicine	Colchicine is a tubulin inhibitor (IC50: 3 nM) and blocks polymerization of microtubules by binding to tubulin.	COc1cc2CC[C@H](NC(C)=O)c3cc(=O)c(OC)ccc3-c2c(OC)c1OC
[truncated: 627 more rows]
