# Supplementary material for: SARS-CoV-2 Requires Cholesterol for Viral Entry and Pathological Syncytia Formation
Source: bioRxiv preprint, doi:10.1101/2020.12.14.422737, version 1 (2020-12-14)
Supplement: TableS2_Cys-Rich_Viral_TM_Proteins [file 422737_file04.xlsx]

## Sheet: Description of Table S2
Table S2, Related to Figure 5. Viral transmembrane proteins with proximal cysteine-rich regions
(1) Acquired the complete set of viral proteins from viruses that infect humans yielding 1,391,780 proteins (data retrieved October 2020) (UniProt Consortium, 2015) [note that this includes duplicates from deposited strains of same virus]
(2) Filtered for proteins in which two or more transmembrane (TM) prediction tools predicted an overlapping TM helix or a transmembrane helix has been experimentally verified, yielding 168,094 proteins
(3) Applied sliding window approach to assess local density of cysteine residues around the transmembrane helices: scanned the thirty-residue regions that lie on the N- or C- terminal sides of each transmembrane helix, using a window size of 20.
(4) For each protein, the transmembrane-adjacent window with the highest fraction of cysteine was taken as the protein’s cysteine fractional ‘score’.
Table S2A tab displays filtered hits (viral transmembrane proteins with fractional cysteine score >= 0.2, ranked by cysteine content from highest to lowest); duplicate sequences from strains of same virus were manually removed
Table S2B tab displays complete set of unfiltered viral transmembrane proteins ranked by fractional cysteine score; note that numberous replicates arise from deposition of viral strain proteomes in Uniprot

## Sheet: Table S2A
Virus (Infects Human)	Gene Name	Uniprot Reviewed	Protein Name	FracCys (20-residue window)	Start of window	UniProt ID	Comments
Severe acute respiratory syndrome coronavirus 2 (SARS-CoV-2)	S	True	Spike glycoprotein	0.5	1235	P0DTC2
Human herpesvirus 6A	U88	True	Uncharacterized protein U88	0.5	135	Q69566	Sequencing error?
Severe acute respiratory syndrome coronavirus (SARS-CoV-1)	S	True	Spike glycoprotein	0.45	1217	P59594
Hepatitis E virus	ORF3	True	Protein ORF3	0.4	3	P69616
Human coronavirus HKU1	S	True	Spike glycoprotein	0.4	1321	Q5MQD0
Human coronavirus NL63	S	True	Spike glycoprotein	0.4	1321	Q6Q1S2
Human coronavirus OC43	S	True	Spike glycoprotein	0.4	1318	P36334
Human papillomavirus type 59	E5	False	Probable protein E5	0.35	1	T2A6T2
Human herpesvirus 6B	N/A	False	Uncharacterized protein	0.35	32	A0A2L2QC05
Middle East respiratory syndrome-related coronavirus (MERS)	S	True	Spike glycoprotein	0.35	1318	K9N5Q8
Human herpesvirus 6B	B4	True	Protein B4	0.3	17	Q9QJ59
Human papillomavirus type 18	E5	False	Probable protein E5	0.3	8	Q76Z94
Orf virus	ORFV120	False	Uncharacterized protein	0.3	143	A0A3G2M292
Severe acute respiratory syndrome coronavirus (SARS-CoV-1)	rep / orf1ab	True	Replicase polyprotein 1ab / 2'-O-methyltransferase	0.3	3750	P0C6X7
Human coronavirus 229E	S	True	Spike glycoprotein	0.3	1135	P15423
Human cytomegalovirus	UL133	True	Protein UL133	0.3	76	Q6SW10
Human adenovirus C	E3	True	Early 3 Conserved Region 1-alpha protein	0.25	35	Q910M3
Human papillomavirus type 16	E5	True	Probable protein E5	0.25	12	P06927
Human papillomavirus type 35	E5	False	Probable protein E5	0.25	10	F8S4L9
Human papillomavirus type 73	E5	False	Probable protein E5	0.25	1	A0A0P0EAS3
Epstein-Barr virus	LMP2	True	Latent membrane protein 2	0.25	470	Q1HVJ2
Molluscum contagiosum virus	MC157R	False	MC157	0.25	333	Q98323
Chikungunya virus	gp2	True	Togavirin	0.25	772	D7R996
Human adenovirus B	E3	False	16 kDa glycoprotein	0.2	126	Q2KSH8
Human papillomavirus type 31	E5	False	Probable protein E5	0.2	7	F8S3G1
Human papillomavirus type 68	E5	False	Probable protein E5	0.2	1	T2A7G7
Measles virus	F	True	Fusion glycoprotein F0	0.2	515	P69354
Dugbe virus	GP	True	Envelopment polyprotein	0.2	576	Q02004
Punta toro phlebovirus	GP	True	Envelopment polyprotein / M protein	0.2	683	P03517
Rift valley fever virus	GP	True	Envelopment polyprotein / glycoprotein	0.2	553	P03518
Uukuniemi virus	GP	True	Envelopment polyprotein	0.2	365	P09613
Human herpesvirus 8 type P	K15	True	Protein K15	0.2	181	Q9QR69
Human herpesvirus 8	KIE-3	False	K4.2	0.2	122	O40921
Epstein-Barr virus	LMP1	False	Latent membrane protein 1	0.2	97	R4R994
Molluscum contagiosum virus	MC002L	False	MC002	0.2	37	A0A1S7DN24
Molluscum contagiosum virus	MC003L	False	MC003	0.2	395	A0A1S7DMI7
Barmah forest virus	N/A	True	Structural polyprotein	0.2	777	P89946
Bunyamwera virus	N/A	False	Envelopment polyprotein	0.2	238	A0A3S8X850
Dugbe virus	N/A	False	Glycoprotein G2	0.2	1472	A0A191KW91
Eastern equine encephalitis virus	N/A	True	Structural polyprotein	0.2	780	Q4QXJ7
Hepatitis C virus genotype 5a	N/A	True	Genome polyprotein	0.2	730	O39928
Human herpesvirus 2	N/A	False	Envelope glycoprotein C	0.2	51	A0A481T7B1
Human papillomavirus type 45	N/A	False	Probable protein E5	0.2	5	A9XFL9
Sandfly fever sicilian virus	N/A	False	Glycoprotein polyprotein	0.2	697	A0A096ZSP7
Semliki forest virus	N/A	False	Togavirin	0.2	789	Q3LRQ8
SFTS phlebovirus	N/A	False	Membrane glycoprotein polyprotein	0.2	423	F1BA47
Sindbis virus	N/A	True	Structural polyprotein	0.2	784	P27285
Toscana virus	N/A	False	Glycoprotein	0.2	696	A0A0U2VWY9
Western equine encephalitis virus	N/A	True	Structural polyprotein	0.2	762	P13897
Influenza B virus	NB	False	Glycoprotein NB	0.2	45	Q1K9G1
Severe acute respiratory syndrome coronavirus 2 (SARS-CoV-2)	ORF3a	False	ORF3a protein	0.2	129	A0A6H1PLZ0
Orf virus	ORFV110	False	EEV glycoprotein	0.2	1	A0A0R8HJ40
Human cytomegalovirus	RL10	False	Envelope glycoprotein RL10	0.2	45	V9LM39
Hepatitis B virus	S	True	Large envelope protein	0.2	220	P17399
Human herpesvirus 7	U12	True	G-protein coupled receptor homolog U12	0.2	114	P52381
Human herpesvirus 6A	U51	True	G-protein coupled receptor homolog U51	0.2	265	P52382
Human herpesvirus 6B	U51	True	G-protein coupled receptor homolog U51	0.2	265	P52542
Human herpesvirus 7	U51	True	G-protein coupled receptor homolog U51	0.2	257	P52383
Human cytomegalovirus	UL141	True	Protein UL141	0.2	299	Q6RJQ3
Human cytomegalovirus	UL148A	True	Protein UL148A	0.2	33	F5HE74
Human cytomegalovirus	US27	True	G-protein coupled receptor homolog US27	0.2	100	P09703
Severe acute respiratory syndrome coronavirus 2 s (SARS-CoV-2)	rep / ORF1ab	False	Replicase polyprotein 1ab / 2'-O-methyltransferase	0.2	2404	A0A6H2EGC6

## Sheet: Table S2B
Fraction of cystein in 20-residue window	UniProt ID	Full UniProt FASTA header	Start of window	Sequence of window
0.5	Q69566	sp|Q69566|U88_HHV6U Uncharacterized protein U88 OS=Human herpesvirus 6A (strain Uganda-1102) OX=10370 GN=U88 PE=4 SV=1	135	VCACLCVCACLCVCACLCVCA
0.5	P0DTC2	sp|P0DTC2|SPIKE_SARS2 Spike glycoprotein OS=Severe acute respiratory syndrome coronavirus 2 OX=2697049 GN=S PE=1 SV=1	1235	CCMTSCCSCLKGCCSCGSCCK
0.5	A0A6H0C5J2	tr|A0A6H0C5J2|A0A6H0C5J2_SARS2 Surface glycoprotein OS=Severe acute respiratory syndrome coronavirus 2 OX=2697049 GN=S PE=4 SV=1	1235	CCMTSCCSCLKGCCSCGSCCK
0.5	A0A6H0C421	tr|A0A6H0C421|A0A6H0C421_SARS2 Surface glycoprotein OS=Severe acute respiratory syndrome coronavirus 2 OX=2697049 GN=S PE=4 SV=1	1235	CCMTSCCSCLKGCCSCGSCCK
0.45	A0A6G7K2M4	tr|A0A6G7K2M4|A0A6G7K2M4_SARS2 Surface glycoprotein OS=Severe acute respiratory syndrome coronavirus 2 OX=2697049 GN=S PE=4 SV=1	1236	CMTSCCSCLKGCCSCGSCCKF
0.45	A0A6H0JMN1	tr|A0A6H0JMN1|A0A6H0JMN1_SARS2 Surface glycoprotein OS=Severe acute respiratory syndrome coronavirus 2 OX=2697049 GN=S PE=4 SV=1	1236	CMTSCCSCLKGCCSCGSCCKF
0.45	A0A6G9ZY67	tr|A0A6G9ZY67|A0A6G9ZY67_SARS2 Surface glycoprotein OS=Severe acute respiratory syndrome coronavirus 2 OX=2697049 GN=S PE=4 SV=1	1236	CMTSCCSCLKGCCSCGSCCKF
0.45	A0A6H1XP66	tr|A0A6H1XP66|A0A6H1XP66_SARS2 Surface glycoprotein OS=Severe acute respiratory syndrome coronavirus 2 OX=2697049 GN=S PE=4 SV=1	1236	CMTSCCSCLKGCCSCGSCCKF
0.45	A0A6H2LC40	tr|A0A6H2LC40|A0A6H2LC40_SARS2 Surface glycoprotein OS=Severe acute respiratory syndrome coronavirus 2 OX=2697049 GN=S PE=4 SV=1	1236	CMTSCCSCLKGCCSCGSCCKF
0.45	P59594	sp|P59594|SPIKE_SARS Spike glycoprotein OS=Severe acute respiratory syndrome coronavirus OX=694009 GN=S PE=1 SV=1	1217	CCMTSCCSCLKGACSCGSCCK
0.45	A0A6G9KFQ6	tr|A0A6G9KFQ6|A0A6G9KFQ6_SARS2 Surface glycoprotein OS=Severe acute respiratory syndrome coronavirus 2 OX=2697049 GN=S PE=4 SV=1	1236	CMTSCCSCLKGCCSCGSCCKF
0.45	A0A6H2L647	tr|A0A6H2L647|A0A6H2L647_SARS2 Surface glycoprotein OS=Severe acute respiratory syndrome coronavirus 2 OX=2697049 GN=S PE=4 SV=1	1236	CMTSCCSCLKGCCSCGSCCKF
0.45	A0A6H1THD0	tr|A0A6H1THD0|A0A6H1THD0_SARS2 Surface glycoprotein OS=Severe acute respiratory syndrome coronavirus 2 OX=2697049 GN=S PE=4 SV=1	1236	CMTSCCSCLKGCCSCGSCCKF
0.45	A0A6H1XPD6	tr|A0A6H1XPD6|A0A6H1XPD6_SARS2 Surface glycoprotein OS=Severe acute respiratory syndrome coronavirus 2 OX=2697049 GN=S PE=4 SV=1	1236	CMTSCCSCLKGCCSCGSCCKF
0.45	A0A6H2EHU5	tr|A0A6H2EHU5|A0A6H2EHU5_SARS2 Surface glycoprotein OS=Severe acute respiratory syndrome coronavirus 2 OX=2697049 GN=S PE=4 SV=1	1236	CMTSCCSCLKGCCSCGSCCKF
0.45	A0A1I9WNV2	tr|A0A1I9WNV2|A0A1I9WNV2_HEV ORF3 OS=Hepatitis E virus OX=12461 PE=4 SV=1	35	RCMSQKCGCLCICFSCCCKCY
0.45	A0A6H0JI07	tr|A0A6H0JI07|A0A6H0JI07_SARS2 Surface glycoprotein OS=Severe acute respiratory syndrome coronavirus 2 OX=2697049 GN=S PE=4 SV=1	1236	CMTSCCSCLKGCCSCGSCCKF
0.45	A0A6H1TGC7	tr|A0A6H1TGC7|A0A6H1TGC7_SARS2 Surface glycoprotein OS=Severe acute respiratory syndrome coronavirus 2 OX=2697049 GN=S PE=4 SV=1	1236	CMTSCCSCLKGCCSCGSCCKF
0.45	A0A6H1PH54	tr|A0A6H1PH54|A0A6H1PH54_SARS2 Surface glycoprotein OS=Severe acute respiratory syndrome coronavirus 2 OX=2697049 GN=S PE=4 SV=1	1236	CMTSCCSCLKGCCSCGSCCKF
0.45	A0A6H1XLX7	tr|A0A6H1XLX7|A0A6H1XLX7_SARS2 Surface glycoprotein OS=Severe acute respiratory syndrome coronavirus 2 OX=2697049 GN=S PE=4 SV=1	1236	CMTSCCSCLKGCCSCGSCCKF
0.45	A0A6H1TGR1	tr|A0A6H1TGR1|A0A6H1TGR1_SARS2 Surface glycoprotein OS=Severe acute respiratory syndrome coronavirus 2 OX=2697049 GN=S PE=4 SV=1	1236	CMTSCCSCLKGCCSCGSCCKF
0.45	A0A6H1PHF5	tr|A0A6H1PHF5|A0A6H1PHF5_SARS2 Surface glycoprotein OS=Severe acute respiratory syndrome coronavirus 2 OX=2697049 GN=S PE=4 SV=1	1236	CMTSCCSCLKGCCSCGSCCKF
0.45	A0A6G9ZWU8	tr|A0A6G9ZWU8|A0A6G9ZWU8_SARS2 Surface glycoprotein OS=Severe acute respiratory syndrome coronavirus 2 OX=2697049 GN=S PE=4 SV=1	1236	CMTSCCSCLKGCCSCGSCCKF
0.45	A0A6H1TG15	tr|A0A6H1TG15|A0A6H1TG15_SARS2 Surface glycoprotein OS=Severe acute respiratory syndrome coronavirus 2 OX=2697049 GN=S PE=4 SV=1	1236	CMTSCCSCLKGCCSCGSCCKF
0.45	A0A6B9WHC1	tr|A0A6B9WHC1|A0A6B9WHC1_SARS2 S protein OS=Severe acute respiratory syndrome coronavirus 2 OX=2697049 GN=S PE=4 SV=1	1236	CMTSCCSCLKGCCSCGSCCKF
0.45	A0A6H2L6Y7	tr|A0A6H2L6Y7|A0A6H2L6Y7_SARS2 Surface glycoprotein OS=Severe acute respiratory syndrome coronavirus 2 OX=2697049 GN=S PE=4 SV=1	1236	CMTSCCSCLKGCCSCGSCCKF
0.45	A0A6H0JNB8	tr|A0A6H0JNB8|A0A6H0JNB8_SARS2 Surface glycoprotein OS=Severe acute respiratory syndrome coronavirus 2 OX=2697049 GN=S PE=4 SV=1	1236	CMTSCCSCLKGCCSCGSCCKF
0.45	A0A6H0JGJ3	tr|A0A6H0JGJ3|A0A6H0JGJ3_SARS2 Surface glycoprotein OS=Severe acute respiratory syndrome coronavirus 2 OX=2697049 GN=S PE=4 SV=1	1236	CMTSCCSCLKGCCSCGSCCKF
0.45	A0A6G9ZY86	tr|A0A6G9ZY86|A0A6G9ZY86_SARS2 Surface glycoprotein OS=Severe acute respiratory syndrome coronavirus 2 OX=2697049 GN=S PE=4 SV=1	1236	CMTSCCSCLKGCCSCGSCCKF
0.45	A0A6H0JQ80	tr|A0A6H0JQ80|A0A6H0JQ80_SARS2 Surface glycoprotein OS=Severe acute respiratory syndrome coronavirus 2 OX=2697049 GN=S PE=4 SV=1	1236	CMTSCCSCLKGCCSCGSCCKF
0.45	A0A6H1PMM5	tr|A0A6H1PMM5|A0A6H1PMM5_SARS2 Surface glycoprotein OS=Severe acute respiratory syndrome coronavirus 2 OX=2697049 GN=S PE=4 SV=1	1236	CMTSCCSCLKGCCSCGSCCKF
0.45	A0A679G9E9	tr|A0A679G9E9|A0A679G9E9_SARS2 Surface glycoprotein OS=Severe acute respiratory syndrome coronavirus 2 OX=2697049 GN=S PE=4 SV=1	1236	CMTSCCSCLKGCCSCGSCCKF
0.45	A0A6H1TJ64	tr|A0A6H1TJ64|A0A6H1TJ64_SARS2 Surface glycoprotein OS=Severe acute respiratory syndrome coronavirus 2 OX=2697049 GN=S PE=4 SV=1	1236	CMTSCCSCLKGCCSCGSCCKF
0.45	A0A6H1XPS1	tr|A0A6H1XPS1|A0A6H1XPS1_SARS2 Surface glycoprotein OS=Severe acute respiratory syndrome coronavirus 2 OX=2697049 GN=S PE=4 SV=1	1236	CMTSCCSCLKGCCSCGSCCKF
0.45	A0A6H1PJZ3	tr|A0A6H1PJZ3|A0A6H1PJZ3_SARS2 Surface glycoprotein OS=Severe acute respiratory syndrome coronavirus 2 OX=2697049 GN=S PE=4 SV=1	1236	CMTSCCSCLKGCCSCGSCCKF
0.45	A0A6G9ZXC8	tr|A0A6G9ZXC8|A0A6G9ZXC8_SARS2 Surface glycoprotein OS=Severe acute respiratory syndrome coronavirus 2 OX=2697049 GN=S PE=4 SV=1	1236	CMTSCCSCLKGCCSCGSCCKF
0.45	A0A6H1TI04	tr|A0A6H1TI04|A0A6H1TI04_SARS2 Surface glycoprotein OS=Severe acute respiratory syndrome coronavirus 2 OX=2697049 GN=S PE=4 SV=1	1236	CMTSCCSCLKGCCSCGSCCKF
0.45	A0A6G8RR89	tr|A0A6G8RR89|A0A6G8RR89_SARS2 Surface glycoprotein OS=Severe acute respiratory syndrome coronavirus 2 OX=2697049 GN=S PE=4 SV=1	1236	CMTSCCSCLKGCCSCGSCCKF
0.45	A0A6H2EIS3	tr|A0A6H2EIS3|A0A6H2EIS3_SARS2 Surface glycoprotein OS=Severe acute respiratory syndrome coronavirus 2 OX=2697049 GN=S PE=4 SV=1	1236	CMTSCCSCLKGCCSCGSCCKF
0.45	A0A6H0C6R0	tr|A0A6H0C6R0|A0A6H0C6R0_SARS2 Surface glycoprotein OS=Severe acute respiratory syndrome coronavirus 2 OX=2697049 GN=S PE=4 SV=1	1236	CMTSCCSCLKGCCSCGSCCKF
0.45	A0A6G9KF55	tr|A0A6G9KF55|A0A6G9KF55_SARS2 Surface glycoprotein OS=Severe acute respiratory syndrome coronavirus 2 OX=2697049 GN=S PE=4 SV=1	1236	CMTSCCSCLKGCCSCGSCCKF
0.45	A0A6G9HF12	tr|A0A6G9HF12|A0A6G9HF12_SARS2 Surface glycoprotein OS=Severe acute respiratory syndrome coronavirus 2 OX=2697049 GN=S PE=4 SV=1	1236	CMTSCCSCLKGCCSCGSCCKF
0.45	A0A6H2EH43	tr|A0A6H2EH43|A0A6H2EH43_SARS2 Surface glycoprotein OS=Severe acute respiratory syndrome coronavirus 2 OX=2697049 GN=S PE=4 SV=1	1236	CMTSCCSCLKGCCSCGSCCKF
0.45	A0A6H2L7L3	tr|A0A6H2L7L3|A0A6H2L7L3_SARS2 Surface glycoprotein OS=Severe acute respiratory syndrome coronavirus 2 OX=2697049 GN=S PE=4 SV=1	1236	CMTSCCSCLKGCCSCGSCCKF
0.45	A0A6H0JQD4	tr|A0A6H0JQD4|A0A6H0JQD4_SARS2 Surface glycoprotein OS=Severe acute respiratory syndrome coronavirus 2 OX=2697049 GN=S PE=4 SV=1	1236	CMTSCCSCLKGCCSCGSCCKF
0.45	A0A6H1Z3H4	tr|A0A6H1Z3H4|A0A6H1Z3H4_SARS2 Surface glycoprotein OS=Severe acute respiratory syndrome coronavirus 2 OX=2697049 GN=S PE=4 SV=1	1236	CMTSCCSCLKGCCSCGSCCKF
0.45	A0A6H1XPS2	tr|A0A6H1XPS2|A0A6H1XPS2_SARS2 Surface glycoprotein OS=Severe acute respiratory syndrome coronavirus 2 OX=2697049 GN=S PE=4 SV=1	1236	CMTSCCSCLKGCCSCGSCCKF
0.45	A0A6H1XPR5	tr|A0A6H1XPR5|A0A6H1XPR5_SARS2 Surface glycoprotein OS=Severe acute respiratory syndrome coronavirus 2 OX=2697049 GN=S PE=4 SV=1	1236	CMTSCCSCLKGCCSCGSCCKF
0.45	A0A6H0C680	tr|A0A6H0C680|A0A6H0C680_SARS2 Surface glycoprotein OS=Severe acute respiratory syndrome coronavirus 2 OX=2697049 GN=S PE=4 SV=1	1236	CMTSCCSCLKGCCSCGSCCKF
0.45	A0A6H1PRU2	tr|A0A6H1PRU2|A0A6H1PRU2_SARS2 Surface glycoprotein OS=Severe acute respiratory syndrome coronavirus 2 OX=2697049 GN=S PE=4 SV=1	1236	CMTSCCSCLKGCCSCGSCCKF
0.45	A0A6C0N4V2	tr|A0A6C0N4V2|A0A6C0N4V2_SARS2 Surface glycoprotein OS=Severe acute respiratory syndrome coronavirus 2 OX=2697049 GN=S PE=4 SV=1	1236	CMTSCCSCLKGCCSCGSCCKF
0.45	A0A6H0YZY1	tr|A0A6H0YZY1|A0A6H0YZY1_SARS2 Surface glycoprotein OS=Severe acute respiratory syndrome coronavirus 2 OX=2697049 GN=S PE=4 SV=1	1236	CMTSCCSCLKGCCSCGSCCKF
0.45	A0A6H0C753	tr|A0A6H0C753|A0A6H0C753_SARS2 Surface glycoprotein OS=Severe acute respiratory syndrome coronavirus 2 OX=2697049 GN=S PE=4 SV=1	1236	CMTSCCSCLKGCCSCGSCCKF
0.45	A0A6H1Z3J6	tr|A0A6H1Z3J6|A0A6H1Z3J6_SARS2 Surface glycoprotein OS=Severe acute respiratory syndrome coronavirus 2 OX=2697049 GN=S PE=4 SV=1	1236	CMTSCCSCLKGCCSCGSCCKF
0.45	A0A6H2L6I0	tr|A0A6H2L6I0|A0A6H2L6I0_SARS2 Surface glycoprotein OS=Severe acute respiratory syndrome coronavirus 2 OX=2697049 GN=S PE=4 SV=1	1236	CMTSCCSCLKGCCSCGSCCKF
0.45	A0A6H0JNH5	tr|A0A6H0JNH5|A0A6H0JNH5_SARS2 Surface glycoprotein OS=Severe acute respiratory syndrome coronavirus 2 OX=2697049 GN=S PE=4 SV=1	1236	CMTSCCSCLKGCCSCGSCCKF
0.45	A0A6H2L6V3	tr|A0A6H2L6V3|A0A6H2L6V3_SARS2 Surface glycoprotein (Fragment) OS=Severe acute respiratory syndrome coronavirus 2 OX=2697049 GN=S PE=4 SV=1	1090	CMTSCCSCLKGCCSCGSCCKF
0.45	A0A6H1PJJ6	tr|A0A6H1PJJ6|A0A6H1PJJ6_SARS2 Surface glycoprotein OS=Severe acute respiratory syndrome coronavirus 2 OX=2697049 GN=S PE=4 SV=1	1236	CMTSCCSCLKGCCSCGSCCKF
0.45	A0A6H2EGX6	tr|A0A6H2EGX6|A0A6H2EGX6_SARS2 Surface glycoprotein OS=Severe acute respiratory syndrome coronavirus 2 OX=2697049 GN=S PE=4 SV=1	1236	CMTSCCSCLKGCCSCGSCCKF
0.45	A0A6G9KFP7	tr|A0A6G9KFP7|A0A6G9KFP7_SARS2 Surface glycoprotein OS=Severe acute respiratory syndrome coronavirus 2 OX=2697049 GN=S PE=4 SV=1	1236	CMTSCCSCLKGCCSCGSCCKF
0.45	A0A6H2L673	tr|A0A6H2L673|A0A6H2L673_SARS2 Surface glycoprotein OS=Severe acute respiratory syndrome coronavirus 2 OX=2697049 GN=S PE=4 SV=1	1236	CMTSCCSCLKGCCSCGSCCKF
0.45	A0A6H2EF22	tr|A0A6H2EF22|A0A6H2EF22_SARS2 Surface glycoprotein OS=Severe acute respiratory syndrome coronavirus 2 OX=2697049 GN=S PE=4 SV=1	1236	CMTSCCSCLKGCCSCGSCCKF
0.45	A0A6H2EJ44	tr|A0A6H2EJ44|A0A6H2EJ44_SARS2 Surface glycoprotein OS=Severe acute respiratory syndrome coronavirus 2 OX=2697049 GN=S PE=4 SV=1	1236	CMTSCCSCLKGCCSCGSCCKF
0.45	A0A6H2LCA8	tr|A0A6H2LCA8|A0A6H2LCA8_SARS2 Surface glycoprotein OS=Severe acute respiratory syndrome coronavirus 2 OX=2697049 GN=S PE=4 SV=1	1236	CMTSCCSCLKGCCSCGSCCKF
0.45	A0A6H0MCE8	tr|A0A6H0MCE8|A0A6H0MCE8_SARS2 Surface glycoprotein OS=Severe acute respiratory syndrome coronavirus 2 OX=2697049 GN=S PE=4 SV=1	1236	CMTSCCSCLKGCCSCGSCCKF
0.45	A0A6H2LBU1	tr|A0A6H2LBU1|A0A6H2LBU1_SARS2 Surface glycoprotein (Fragment) OS=Severe acute respiratory syndrome coronavirus 2 OX=2697049 GN=S PE=4 SV=1	1093	CMTSCCSCLKGCCSCGSCCKF
0.45	A0A6H2L5V2	tr|A0A6H2L5V2|A0A6H2L5V2_SARS2 Surface glycoprotein OS=Severe acute respiratory syndrome coronavirus 2 OX=2697049 GN=S PE=4 SV=1	1236	CMTSCCSCLKGCCSCGSCCKF
0.45	A0A6H1PQP7	tr|A0A6H1PQP7|A0A6H1PQP7_SARS2 Surface glycoprotein OS=Severe acute respiratory syndrome coronavirus 2 OX=2697049 GN=S PE=4 SV=1	1236	CMTSCCSCLKGCCSCGSCCKF
0.45	A0A6C0QGH5	tr|A0A6C0QGH5|A0A6C0QGH5_SARS2 Surface glycoprotein OS=Severe acute respiratory syndrome coronavirus 2 OX=2697049 GN=S PE=4 SV=1	1236	CMTSCCSCLKGCCSCGSCCKF
0.45	A0A6H2L8J8	tr|A0A6H2L8J8|A0A6H2L8J8_SARS2 Surface glycoprotein OS=Severe acute respiratory syndrome coronavirus 2 OX=2697049 GN=S PE=4 SV=1	1236	CMTSCCSCLKGCCSCGSCCKF
0.45	A0A6H1XMY1	tr|A0A6H1XMY1|A0A6H1XMY1_SARS2 Surface glycoprotein OS=Severe acute respiratory syndrome coronavirus 2 OX=2697049 GN=S PE=4 SV=1	1236	CMTSCCSCLKGCCSCGSCCKF
0.45	A0A6G9ZXG8	tr|A0A6G9ZXG8|A0A6G9ZXG8_SARS2 Surface glycoprotein OS=Severe acute respiratory syndrome coronavirus 2 OX=2697049 GN=S PE=4 SV=1	1236	CMTSCCSCLKGCCSCGSCCKF
0.45	A0A6G9ZWY9	tr|A0A6G9ZWY9|A0A6G9ZWY9_SARS2 Surface glycoprotein OS=Severe acute respiratory syndrome coronavirus 2 OX=2697049 PE=4 SV=1	1236	CMTSCCSCLKGCCSCGSCCKF
0.45	A0A6H1XNH4	tr|A0A6H1XNH4|A0A6H1XNH4_SARS2 Surface glycoprotein OS=Severe acute respiratory syndrome coronavirus 2 OX=2697049 GN=S PE=4 SV=1	1236	CMTSCCSCLKGCCSCGSCCKF
0.45	A0A6H1PKE6	tr|A0A6H1PKE6|A0A6H1PKE6_SARS2 Surface glycoprotein OS=Severe acute respiratory syndrome coronavirus 2 OX=2697049 GN=S PE=4 SV=1	1236	CMTSCCSCLKGCCSCGSCCKF
0.45	A0A6H2L8A0	tr|A0A6H2L8A0|A0A6H2L8A0_SARS2 Surface glycoprotein OS=Severe acute respiratory syndrome coronavirus 2 OX=2697049 GN=S PE=4 SV=1	1236	CMTSCCSCLKGCCSCGSCCKF
0.45	A0A6H2TXT6	tr|A0A6H2TXT6|A0A6H2TXT6_SARS2 Surface glycoprotein OS=Severe acute respiratory syndrome coronavirus 2 OX=2697049 GN=S PE=4 SV=1	1236	CMTSCCSCLKGCCSCGSCCKF
0.45	A0A6H0C6F4	tr|A0A6H0C6F4|A0A6H0C6F4_SARS2 Surface glycoprotein OS=Severe acute respiratory syndrome coronavirus 2 OX=2697049 GN=S PE=4 SV=1	1236	CMTSCCSCLKGCCSCGSCCKF
0.45	A0A6H2L683	tr|A0A6H2L683|A0A6H2L683_SARS2 Surface glycoprotein OS=Severe acute respiratory syndrome coronavirus 2 OX=2697049 GN=S PE=4 SV=1	1236	CMTSCCSCLKGCCSCGSCCKF
0.45	A0A6C0RQ44	tr|A0A6C0RQ44|A0A6C0RQ44_SARS2 Surface glycoprotein OS=Severe acute respiratory syndrome coronavirus 2 OX=2697049 GN=S PE=4 SV=1	1236	CMTSCCSCLKGCCSCGSCCKF
0.45	A0A6C0X2H7	tr|A0A6C0X2H7|A0A6C0X2H7_SARS2 Surface glycoprotein OS=Severe acute respiratory syndrome coronavirus 2 OX=2697049 GN=S PE=4 SV=1	1236	CMTSCCSCLKGCCSCGSCCKF
0.45	A0A6H2EIL9	tr|A0A6H2EIL9|A0A6H2EIL9_SARS2 Surface glycoprotein OS=Severe acute respiratory syndrome coronavirus 2 OX=2697049 GN=S PE=4 SV=1	1236	CMTSCCSCLKGCCSCGSCCKF
0.45	A0A6H1PLX6	tr|A0A6H1PLX6|A0A6H1PLX6_SARS2 Surface glycoprotein OS=Severe acute respiratory syndrome coronavirus 2 OX=2697049 GN=S PE=4 SV=1	1236	CMTSCCSCLKGCCSCGSCCKF
0.45	A0A6H2L964	tr|A0A6H2L964|A0A6H2L964_SARS2 Surface glycoprotein OS=Severe acute respiratory syndrome coronavirus 2 OX=2697049 GN=S PE=4 SV=1	1236	CMTSCCSCLKGCCSCGSCCKF
0.45	A0A6H1PS77	tr|A0A6H1PS77|A0A6H1PS77_SARS2 Surface glycoprotein OS=Severe acute respiratory syndrome coronavirus 2 OX=2697049 GN=S PE=4 SV=1	1236	CMTSCCSCLKGCCSCGSCCKF
0.45	A0A6H0JGD1	tr|A0A6H0JGD1|A0A6H0JGD1_SARS2 Surface glycoprotein OS=Severe acute respiratory syndrome coronavirus 2 OX=2697049 GN=S PE=4 SV=1	1236	CMTSCCSCLKGCCSCGSCCKF
0.45	A0A6H2LAK3	tr|A0A6H2LAK3|A0A6H2LAK3_SARS2 Surface glycoprotein OS=Severe acute respiratory syndrome coronavirus 2 OX=2697049 GN=S PE=4 SV=1	1236	CMTSCCSCLKGCCSCGSCCKF
0.45	A0A6H1PGV2	tr|A0A6H1PGV2|A0A6H1PGV2_SARS2 Surface glycoprotein OS=Severe acute respiratory syndrome coronavirus 2 OX=2697049 GN=S PE=4 SV=1	1236	CMTSCCSCLKGCCSCGSCCKF
0.45	A0A6H1W0J3	tr|A0A6H1W0J3|A0A6H1W0J3_SARS2 Surface glycoprotein OS=Severe acute respiratory syndrome coronavirus 2 OX=2697049 GN=S PE=4 SV=1	1236	CMTSCCSCLKGCCSCGSCCKF
0.45	A0A6H0JG88	tr|A0A6H0JG88|A0A6H0JG88_SARS2 Surface glycoprotein OS=Severe acute respiratory syndrome coronavirus 2 OX=2697049 GN=S PE=4 SV=1	1236	CMTSCCSCLKGCCSCGSCCKF
0.45	A0A6H0JGC6	tr|A0A6H0JGC6|A0A6H0JGC6_SARS2 Surface glycoprotein OS=Severe acute respiratory syndrome coronavirus 2 OX=2697049 GN=S PE=4 SV=1	1236	CMTSCCSCLKGCCSCGSCCKF
0.45	A0A6H0QT82	tr|A0A6H0QT82|A0A6H0QT82_SARS2 Surface glycoprotein OS=Severe acute respiratory syndrome coronavirus 2 OX=2697049 GN=S PE=4 SV=1	1236	CMTSCCSCLKGCCSCGSCCKF
0.45	A0A6H0QT46	tr|A0A6H0QT46|A0A6H0QT46_SARS2 Surface glycoprotein OS=Severe acute respiratory syndrome coronavirus 2 OX=2697049 GN=S PE=4 SV=1	1236	CMTSCCSCLKGCCSCGSCCKF
0.45	A0A6G9ZXI6	tr|A0A6G9ZXI6|A0A6G9ZXI6_SARS2 Surface glycoprotein OS=Severe acute respiratory syndrome coronavirus 2 OX=2697049 GN=S PE=4 SV=1	1236	CMTSCCSCLKGCCSCGSCCKF
0.45	A0A6H1PNC3	tr|A0A6H1PNC3|A0A6H1PNC3_SARS2 Surface glycoprotein OS=Severe acute respiratory syndrome coronavirus 2 OX=2697049 GN=S PE=4 SV=1	1236	CMTSCCSCLKGCCSCGSCCKF
0.45	A0A6H1PKK3	tr|A0A6H1PKK3|A0A6H1PKK3_SARS2 Surface glycoprotein OS=Severe acute respiratory syndrome coronavirus 2 OX=2697049 GN=S PE=4 SV=1	1236	CMTSCCSCLKGCCSCGSCCKF
0.45	A0A6H0JNI0	tr|A0A6H0JNI0|A0A6H0JNI0_SARS2 Surface glycoprotein OS=Severe acute respiratory syndrome coronavirus 2 OX=2697049 GN=S PE=4 SV=1	1236	CMTSCCSCLKGCCSCGSCCKF
0.45	A0A6H2LAG5	tr|A0A6H2LAG5|A0A6H2LAG5_SARS2 Surface glycoprotein OS=Severe acute respiratory syndrome coronavirus 2 OX=2697049 GN=S PE=4 SV=1	1236	CMTSCCSCLKGCCSCGSCCKF
0.45	A0A6H2L702	tr|A0A6H2L702|A0A6H2L702_SARS2 Surface glycoprotein OS=Severe acute respiratory syndrome coronavirus 2 OX=2697049 GN=S PE=4 SV=1	1236	CMTSCCSCLKGCCSCGSCCKF
0.45	A0A6H1XNU4	tr|A0A6H1XNU4|A0A6H1XNU4_SARS2 Surface glycoprotein OS=Severe acute respiratory syndrome coronavirus 2 OX=2697049 GN=S PE=4 SV=1	1236	CMTSCCSCLKGCCSCGSCCKF
0.45	A0A6H2EIG0	tr|A0A6H2EIG0|A0A6H2EIG0_SARS2 Surface glycoprotein OS=Severe acute respiratory syndrome coronavirus 2 OX=2697049 GN=S PE=4 SV=1	1236	CMTSCCSCLKGCCSCGSCCKF
0.45	A0A6H0C583	tr|A0A6H0C583|A0A6H0C583_SARS2 Surface glycoprotein OS=Severe acute respiratory syndrome coronavirus 2 OX=2697049 GN=S PE=4 SV=1	1236	CMTSCCSCLKGCCSCGSCCKF
0.45	A0A6H2LBD2	tr|A0A6H2LBD2|A0A6H2LBD2_SARS2 Surface glycoprotein OS=Severe acute respiratory syndrome coronavirus 2 OX=2697049 GN=S PE=4 SV=1	1236	CMTSCCSCLKGCCSCGSCCKF
0.45	A0A6G5ZVU5	tr|A0A6G5ZVU5|A0A6G5ZVU5_SARS2 Surface glycoprotein OS=Severe acute respiratory syndrome coronavirus 2 OX=2697049 GN=S PE=4 SV=1	1235	CMTSCCSCLKGCCSCGSCCKF
0.45	A0A6H2EHE5	tr|A0A6H2EHE5|A0A6H2EHE5_SARS2 Surface glycoprotein OS=Severe acute respiratory syndrome coronavirus 2 OX=2697049 GN=S PE=4 SV=1	1236	CMTSCCSCLKGCCSCGSCCKF
0.45	A0A6H1PLF6	tr|A0A6H1PLF6|A0A6H1PLF6_SARS2 Surface glycoprotein OS=Severe acute respiratory syndrome coronavirus 2 OX=2697049 GN=S PE=4 SV=1	1236	CMTSCCSCLKGCCSCGSCCKF
0.45	A0A6G9ZWX7	tr|A0A6G9ZWX7|A0A6G9ZWX7_SARS2 Surface glycoprotein OS=Severe acute respiratory syndrome coronavirus 2 OX=2697049 PE=4 SV=1	1236	CMTSCCSCLKGCCSCGSCCKF
0.45	A0A6H2LBL7	tr|A0A6H2LBL7|A0A6H2LBL7_SARS2 Surface glycoprotein OS=Severe acute respiratory syndrome coronavirus 2 OX=2697049 GN=S PE=4 SV=1	1236	CMTSCCSCLKGCCSCGSCCKF
0.45	A0A6H1PKH2	tr|A0A6H1PKH2|A0A6H1PKH2_SARS2 Surface glycoprotein OS=Severe acute respiratory syndrome coronavirus 2 OX=2697049 GN=S PE=4 SV=1	1236	CMTSCCSCLKGCCSCGSCCKF
0.45	A0A6G9ZX27	tr|A0A6G9ZX27|A0A6G9ZX27_SARS2 Surface glycoprotein OS=Severe acute respiratory syndrome coronavirus 2 OX=2697049 GN=S PE=4 SV=1	1236	CMTSCCSCLKGCCSCGSCCKF
0.45	A0A6H1PIR8	tr|A0A6H1PIR8|A0A6H1PIR8_SARS2 Surface glycoprotein OS=Severe acute respiratory syndrome coronavirus 2 OX=2697049 GN=S PE=4 SV=1	1236	CMTSCCSCLKGCCSCGSCCKF
0.45	A0A6H1XN50	tr|A0A6H1XN50|A0A6H1XN50_SARS2 Surface glycoprotein OS=Severe acute respiratory syndrome coronavirus 2 OX=2697049 GN=S PE=4 SV=1	1236	CMTSCCSCLKGCCSCGSCCKF
0.45	A0A6H0C4V5	tr|A0A6H0C4V5|A0A6H0C4V5_SARS2 Surface glycoprotein OS=Severe acute respiratory syndrome coronavirus 2 OX=2697049 GN=S PE=4 SV=1	1236	CMTSCCSCLKGCCSCGSCCKF
0.45	A0A6H1PI57	tr|A0A6H1PI57|A0A6H1PI57_SARS2 Surface glycoprotein (Fragment) OS=Severe acute respiratory syndrome coronavirus 2 OX=2697049 GN=S PE=4 SV=1	1236	CMTSCCSCLKGCCSCGSCCKF
0.45	A0A6H2LCE3	tr|A0A6H2LCE3|A0A6H2LCE3_SARS2 Surface glycoprotein (Fragment) OS=Severe acute respiratory syndrome coronavirus 2 OX=2697049 GN=S PE=4 SV=1	1223	CMTSCCSCLKGCCSCGSCCKF
0.45	A0A6H1PND4	tr|A0A6H1PND4|A0A6H1PND4_SARS2 Surface glycoprotein OS=Severe acute respiratory syndrome coronavirus 2 OX=2697049 GN=S PE=4 SV=1	1236	CMTSCCSCLKGCCSCGSCCKF
0.45	A0A6H1XMW7	tr|A0A6H1XMW7|A0A6H1XMW7_SARS2 Surface glycoprotein OS=Severe acute respiratory syndrome coronavirus 2 OX=2697049 GN=S PE=4 SV=1	1236	CMTSCCSCLKGCCSCGSCCKF
0.45	A0A6H1PJA5	tr|A0A6H1PJA5|A0A6H1PJA5_SARS2 Surface glycoprotein OS=Severe acute respiratory syndrome coronavirus 2 OX=2697049 GN=S PE=4 SV=1	1236	CMTSCCSCLKGCCSCGSCCKF
0.45	A0A6H1W2H2	tr|A0A6H1W2H2|A0A6H1W2H2_SARS2 Surface glycoprotein OS=Severe acute respiratory syndrome coronavirus 2 OX=2697049 GN=S PE=4 SV=1	1236	CMTSCCSCLKGCCSCGSCCKF
0.45	A0A6H0C790	tr|A0A6H0C790|A0A6H0C790_SARS2 Surface glycoprotein OS=Severe acute respiratory syndrome coronavirus 2 OX=2697049 GN=S PE=4 SV=1	1236	CMTSCCSCLKGCCSCGSCCKF
0.45	A0A6G9KF92	tr|A0A6G9KF92|A0A6G9KF92_SARS2 Surface glycoprotein OS=Severe acute respiratory syndrome coronavirus 2 OX=2697049 GN=S PE=4 SV=1	1236	CMTSCCSCLKGCCSCGSCCKF
0.45	A0A6G9KF73	tr|A0A6G9KF73|A0A6G9KF73_SARS2 Surface glycoprotein OS=Severe acute respiratory syndrome coronavirus 2 OX=2697049 GN=S PE=4 SV=1	1236	CMTSCCSCLKGCCSCGSCCKF
0.45	A0A6H2EHY4	tr|A0A6H2EHY4|A0A6H2EHY4_SARS2 Surface glycoprotein OS=Severe acute respiratory syndrome coronavirus 2 OX=2697049 GN=S PE=4 SV=1	1236	CMTSCCSCLKGCCSCGSCCKF
0.45	A0A6H2EF79	tr|A0A6H2EF79|A0A6H2EF79_SARS2 Surface glycoprotein OS=Severe acute respiratory syndrome coronavirus 2 OX=2697049 GN=S PE=4 SV=1	1236	CMTSCCSCLKGCCSCGSCCKF
0.45	A0A6H1PK00	tr|A0A6H1PK00|A0A6H1PK00_SARS2 Surface glycoprotein OS=Severe acute respiratory syndrome coronavirus 2 OX=2697049 GN=S PE=4 SV=1	1236	CMTSCCSCLKGCCSCGSCCKF
0.45	A0A6H1XNM4	tr|A0A6H1XNM4|A0A6H1XNM4_SARS2 Surface glycoprotein OS=Severe acute respiratory syndrome coronavirus 2 OX=2697049 GN=S PE=4 SV=1	1236	CMTSCCSCLKGCCSCGSCCKF
0.45	A0A6G9ZWV6	tr|A0A6G9ZWV6|A0A6G9ZWV6_SARS2 Surface glycoprotein OS=Severe acute respiratory syndrome coronavirus 2 OX=2697049 GN=S PE=4 SV=1	1236	CMTSCCSCLKGCCSCGSCCKF
0.45	A0A6H1PKX0	tr|A0A6H1PKX0|A0A6H1PKX0_SARS2 Surface glycoprotein OS=Severe acute respiratory syndrome coronavirus 2 OX=2697049 GN=S PE=4 SV=1	1236	CMTSCCSCLKGCCSCGSCCKF
0.45	A0A6H2LAW8	tr|A0A6H2LAW8|A0A6H2LAW8_SARS2 Surface glycoprotein OS=Severe acute respiratory syndrome coronavirus 2 OX=2697049 GN=S PE=4 SV=1	1236	CMTSCCSCLKGCCSCGSCCKF
0.45	A0A6H0QTK2	tr|A0A6H0QTK2|A0A6H0QTK2_SARS2 Surface glycoprotein OS=Severe acute respiratory syndrome coronavirus 2 OX=2697049 GN=S PE=4 SV=1	1236	CMTSCCSCLKGCCSCGSCCKF
0.45	A0A6H1PH68	tr|A0A6H1PH68|A0A6H1PH68_SARS2 Surface glycoprotein OS=Severe acute respiratory syndrome coronavirus 2 OX=2697049 GN=S PE=4 SV=1	1236	CMTSCCSCLKGCCSCGSCCKF
0.45	A0A6H1PIU3	tr|A0A6H1PIU3|A0A6H1PIU3_SARS2 Surface glycoprotein OS=Severe acute respiratory syndrome coronavirus 2 OX=2697049 GN=S PE=4 SV=1	1236	CMTSCCSCLKGCCSCGSCCKF
0.45	A0A6H2EHR4	tr|A0A6H2EHR4|A0A6H2EHR4_SARS2 Surface glycoprotein OS=Severe acute respiratory syndrome coronavirus 2 OX=2697049 GN=S PE=4 SV=1	1236	CMTSCCSCLKGCCSCGSCCKF
0.45	A0A6G9ZYB3	tr|A0A6G9ZYB3|A0A6G9ZYB3_SARS2 Surface glycoprotein OS=Severe acute respiratory syndrome coronavirus 2 OX=2697049 GN=S PE=4 SV=1	1236	CMTSCCSCLKGCCSCGSCCKF
0.45	A0A6H1PJL3	tr|A0A6H1PJL3|A0A6H1PJL3_SARS2 Surface glycoprotein OS=Severe acute respiratory syndrome coronavirus 2 OX=2697049 GN=S PE=4 SV=1	1236	CMTSCCSCLKGCCSCGSCCKF
0.45	A0A6H0C6J2	tr|A0A6H0C6J2|A0A6H0C6J2_SARS2 Surface glycoprotein OS=Severe acute respiratory syndrome coronavirus 2 OX=2697049 GN=S PE=4 SV=1	1236	CMTSCCSCLKGCCSCGSCCKF
0.45	A0A6H2EH00	tr|A0A6H2EH00|A0A6H2EH00_SARS2 Surface glycoprotein OS=Severe acute respiratory syndrome coronavirus 2 OX=2697049 GN=S PE=4 SV=1	1236	CMTSCCSCLKGCCSCGSCCKF
0.45	A0A6H2EGG7	tr|A0A6H2EGG7|A0A6H2EGG7_SARS2 Surface glycoprotein OS=Severe acute respiratory syndrome coronavirus 2 OX=2697049 GN=S PE=4 SV=1	1236	CMTSCCSCLKGCCSCGSCCKF
0.45	A0A6H0JM06	tr|A0A6H0JM06|A0A6H0JM06_SARS2 Surface glycoprotein OS=Severe acute respiratory syndrome coronavirus 2 OX=2697049 GN=S PE=4 SV=1	1236	CMTSCCSCLKGCCSCGSCCKF
0.45	A0A6G9ZXT1	tr|A0A6G9ZXT1|A0A6G9ZXT1_SARS2 Surface glycoprotein OS=Severe acute respiratory syndrome coronavirus 2 OX=2697049 GN=S PE=4 SV=1	1236	CMTSCCSCLKGCCSCGSCCKF
0.45	A0A6H1PLZ8	tr|A0A6H1PLZ8|A0A6H1PLZ8_SARS2 Surface glycoprotein OS=Severe acute respiratory syndrome coronavirus 2 OX=2697049 GN=S PE=4 SV=1	1236	CMTSCCSCLKGCCSCGSCCKF
0.45	A0A6H1PJ97	tr|A0A6H1PJ97|A0A6H1PJ97_SARS2 Surface glycoprotein OS=Severe acute respiratory syndrome coronavirus 2 OX=2697049 GN=S PE=4 SV=1	1236	CMTSCCSCLKGCCSCGSCCKF
0.45	A0A6H1THA3	tr|A0A6H1THA3|A0A6H1THA3_SARS2 Surface glycoprotein OS=Severe acute respiratory syndrome coronavirus 2 OX=2697049 GN=S PE=4 SV=1	1236	CMTSCCSCLKGCCSCGSCCKF
0.45	A0A6H2EID9	tr|A0A6H2EID9|A0A6H2EID9_SARS2 Surface glycoprotein OS=Severe acute respiratory syndrome coronavirus 2 OX=2697049 GN=S PE=4 SV=1	1236	CMTSCCSCLKGCCSCGSCCKF
0.45	A0A6H1TGC3	tr|A0A6H1TGC3|A0A6H1TGC3_SARS2 Surface glycoprotein (Fragment) OS=Severe acute respiratory syndrome coronavirus 2 OX=2697049 GN=S PE=4 SV=1	1200	CMTSCCSCLKGCCSCGSCCKF
0.45	A0A6H0JPQ2	tr|A0A6H0JPQ2|A0A6H0JPQ2_SARS2 Surface glycoprotein OS=Severe acute respiratory syndrome coronavirus 2 OX=2697049 GN=S PE=4 SV=1	1236	CMTSCCSCLKGCCSCGSCCKF
0.45	A0A6H0QVE4	tr|A0A6H0QVE4|A0A6H0QVE4_SARS2 Surface glycoprotein OS=Severe acute respiratory syndrome coronavirus 2 OX=2697049 GN=S PE=4 SV=1	1236	CMTSCCSCLKGCCSCGSCCKF
0.45	A0A6H2EIN2	tr|A0A6H2EIN2|A0A6H2EIN2_SARS2 Surface glycoprotein OS=Severe acute respiratory syndrome coronavirus 2 OX=2697049 GN=S PE=4 SV=1	1236	CMTSCCSCLKGCCSCGSCCKF
0.45	A0A6H1PIL7	tr|A0A6H1PIL7|A0A6H1PIL7_SARS2 Surface glycoprotein OS=Severe acute respiratory syndrome coronavirus 2 OX=2697049 GN=S PE=4 SV=1	1236	CMTSCCSCLKGCCSCGSCCKF
0.45	A0A6H1PMZ2	tr|A0A6H1PMZ2|A0A6H1PMZ2_SARS2 Surface glycoprotein OS=Severe acute respiratory syndrome coronavirus 2 OX=2697049 GN=S PE=4 SV=1	1236	CMTSCCSCLKGCCSCGSCCKF
0.45	A0A6H2EGA9	tr|A0A6H2EGA9|A0A6H2EGA9_SARS2 Surface glycoprotein OS=Severe acute respiratory syndrome coronavirus 2 OX=2697049 GN=S PE=4 SV=1	1236	CMTSCCSCLKGCCSCGSCCKF
0.45	A0A6H2LCL7	tr|A0A6H2LCL7|A0A6H2LCL7_SARS2 Surface glycoprotein OS=Severe acute respiratory syndrome coronavirus 2 OX=2697049 GN=S PE=4 SV=1	1236	CMTSCCSCLKGCCSCGSCCKF
0.45	A0A6H1PPL6	tr|A0A6H1PPL6|A0A6H1PPL6_SARS2 Surface glycoprotein OS=Severe acute respiratory syndrome coronavirus 2 OX=2697049 GN=S PE=4 SV=1	1236	CMTSCCSCLKGCCSCGSCCKF
0.45	A0A6G9ZXZ8	tr|A0A6G9ZXZ8|A0A6G9ZXZ8_SARS2 Surface glycoprotein OS=Severe acute respiratory syndrome coronavirus 2 OX=2697049 GN=S PE=4 SV=1	1236	CMTSCCSCLKGCCSCGSCCKF
0.45	A0A6H2EGG9	tr|A0A6H2EGG9|A0A6H2EGG9_SARS2 Surface glycoprotein OS=Severe acute respiratory syndrome coronavirus 2 OX=2697049 GN=S PE=4 SV=1	1236	CMTSCCSCLKGCCSCGSCCKF
0.45	A0A6H2EI47	tr|A0A6H2EI47|A0A6H2EI47_SARS2 Surface glycoprotein OS=Severe acute respiratory syndrome coronavirus 2 OX=2697049 GN=S PE=4 SV=1	1236	CMTSCCSCLKGCCSCGSCCKF
0.45	A0A6H0C7Y4	tr|A0A6H0C7Y4|A0A6H0C7Y4_SARS2 Surface glycoprotein OS=Severe acute respiratory syndrome coronavirus 2 OX=2697049 GN=S PE=4 SV=1	1236	CMTSCCSCLKGCCSCGSCCKF
0.45	A0A6H1XNJ1	tr|A0A6H1XNJ1|A0A6H1XNJ1_SARS2 Surface glycoprotein OS=Severe acute respiratory syndrome coronavirus 2 OX=2697049 GN=S PE=4 SV=1	1236	CMTSCCSCLKGCCSCGSCCKF
0.45	A0A6H1XLT4	tr|A0A6H1XLT4|A0A6H1XLT4_SARS2 Surface glycoprotein OS=Severe acute respiratory syndrome coronavirus 2 OX=2697049 GN=S PE=4 SV=1	1236	CMTSCCSCLKGCCSCGSCCKF
0.45	A0A6H1XMU5	tr|A0A6H1XMU5|A0A6H1XMU5_SARS2 Surface glycoprotein OS=Severe acute respiratory syndrome coronavirus 2 OX=2697049 GN=S PE=4 SV=1	1236	CMTSCCSCLKGCCSCGSCCKF
0.45	A0A6H2EFX7	tr|A0A6H2EFX7|A0A6H2EFX7_SARS2 Surface glycoprotein OS=Severe acute respiratory syndrome coronavirus 2 OX=2697049 GN=S PE=4 SV=1	1236	CMTSCCSCLKGCCSCGSCCKF
0.45	A0A6H2L627	tr|A0A6H2L627|A0A6H2L627_SARS2 Surface glycoprotein OS=Severe acute respiratory syndrome coronavirus 2 OX=2697049 GN=S PE=4 SV=1	1236	CMTSCCSCLKGCCSCGSCCKF
0.45	A0A6H0JNQ1	tr|A0A6H0JNQ1|A0A6H0JNQ1_SARS2 Surface glycoprotein OS=Severe acute respiratory syndrome coronavirus 2 OX=2697049 GN=S PE=4 SV=1	1236	CMTSCCSCLKGCCSCGSCCKF
0.45	A0A6H0C633	tr|A0A6H0C633|A0A6H0C633_SARS2 Surface glycoprotein OS=Severe acute respiratory syndrome coronavirus 2 OX=2697049 GN=S PE=4 SV=1	1236	CMTSCCSCLKGCCSCGSCCKF
0.45	A0A6H1PNJ4	tr|A0A6H1PNJ4|A0A6H1PNJ4_SARS2 Surface glycoprotein OS=Severe acute respiratory syndrome coronavirus 2 OX=2697049 GN=S PE=4 SV=1	1236	CMTSCCSCLKGCCSCGSCCKF
0.45	A0A6H0C7A7	tr|A0A6H0C7A7|A0A6H0C7A7_SARS2 Surface glycoprotein OS=Severe acute respiratory syndrome coronavirus 2 OX=2697049 GN=S PE=4 SV=1	1236	CMTSCCSCLKGCCSCGSCCKF
0.45	A0A6G9HF19	tr|A0A6G9HF19|A0A6G9HF19_SARS2 Surface glycoprotein OS=Severe acute respiratory syndrome coronavirus 2 OX=2697049 GN=S PE=4 SV=1	1236	CMTSCCSCLKGCCSCGSCCKF
0.45	A0A6H1XMY7	tr|A0A6H1XMY7|A0A6H1XMY7_SARS2 Surface glycoprotein OS=Severe acute respiratory syndrome coronavirus 2 OX=2697049 GN=S PE=4 SV=1	1236	CMTSCCSCLKGCCSCGSCCKF
0.45	A0A6H0JGK5	tr|A0A6H0JGK5|A0A6H0JGK5_SARS2 Surface glycoprotein OS=Severe acute respiratory syndrome coronavirus 2 OX=2697049 GN=S PE=4 SV=1	1236	CMTSCCSCLKGCCSCGSCCKF
0.45	A0A6G9ZYE7	tr|A0A6G9ZYE7|A0A6G9ZYE7_SARS2 Surface glycoprotein OS=Severe acute respiratory syndrome coronavirus 2 OX=2697049 GN=S PE=4 SV=1	1236	CMTSCCSCLKGCCSCGSCCKF
0.45	A0A6H0C6Q6	tr|A0A6H0C6Q6|A0A6H0C6Q6_SARS2 Surface glycoprotein OS=Severe acute respiratory syndrome coronavirus 2 OX=2697049 GN=S PE=4 SV=1	1235	CMTSCCSCLKGCCSCGSCCKG
0.45	A0A6B9XJC0	tr|A0A6B9XJC0|A0A6B9XJC0_SARS2 Surface glycoprotein OS=Severe acute respiratory syndrome coronavirus 2 OX=2697049 GN=S PE=4 SV=1	1236	CMTSCCSCLKGCCSCGSCCKF
0.45	A0A6H2LC46	tr|A0A6H2LC46|A0A6H2LC46_SARS2 Surface glycoprotein OS=Severe acute respiratory syndrome coronavirus 2 OX=2697049 GN=S PE=4 SV=1	1236	CMTSCCSCLKGCCSCGSCCKF
0.45	A0A6H1TFF9	tr|A0A6H1TFF9|A0A6H1TFF9_SARS2 Surface glycoprotein OS=Severe acute respiratory syndrome coronavirus 2 OX=2697049 GN=S PE=4 SV=1	1236	CMTSCCSCLKGCCSCGSCCKF
0.45	A0A6H0C589	tr|A0A6H0C589|A0A6H0C589_SARS2 Surface glycoprotein OS=Severe acute respiratory syndrome coronavirus 2 OX=2697049 GN=S PE=4 SV=1	1236	CMTSCCSCLKGCCSCGSCCKF
0.45	A0A6H0C784	tr|A0A6H0C784|A0A6H0C784_SARS2 Surface glycoprotein OS=Severe acute respiratory syndrome coronavirus 2 OX=2697049 GN=S PE=4 SV=1	1236	CMTSCCSCLKGCCSCGSCCKF
0.45	A0A6G7S658	tr|A0A6G7S658|A0A6G7S658_SARS2 Surface glycoprotein OS=Severe acute respiratory syndrome coronavirus 2 OX=2697049 GN=S PE=4 SV=1	1236	CMTSCCSCLKGCCSCGSCCKF
0.45	A0A6H1XMA3	tr|A0A6H1XMA3|A0A6H1XMA3_SARS2 Surface glycoprotein OS=Severe acute respiratory syndrome coronavirus 2 OX=2697049 GN=S PE=4 SV=1	1236	CMTSCCSCLKGCCSCGSCCKF
0.45	A0A6G8I328	tr|A0A6G8I328|A0A6G8I328_SARS2 Surface glycoprotein OS=Severe acute respiratory syndrome coronavirus 2 OX=2697049 PE=4 SV=1	1236	CMTSCCSCLKGCCSCGSCCKF
0.45	A0A6H0C6Y4	tr|A0A6H0C6Y4|A0A6H0C6Y4_SARS2 Surface glycoprotein OS=Severe acute respiratory syndrome coronavirus 2 OX=2697049 GN=S PE=4 SV=1	1236	CMTSCCSCLKGCCSCGSCCKF
0.45	A0A6H1PKP9	tr|A0A6H1PKP9|A0A6H1PKP9_SARS2 Surface glycoprotein OS=Severe acute respiratory syndrome coronavirus 2 OX=2697049 GN=S PE=4 SV=1	1236	CMTSCCSCLKGCCSCGSCCKF
0.45	A0A6G9KF08	tr|A0A6G9KF08|A0A6G9KF08_SARS2 Surface glycoprotein OS=Severe acute respiratory syndrome coronavirus 2 OX=2697049 GN=S PE=4 SV=1	1236	CMTSCCSCLKGCCSCGSCCKF
0.45	A0A6H2L761	tr|A0A6H2L761|A0A6H2L761_SARS2 Surface glycoprotein OS=Severe acute respiratory syndrome coronavirus 2 OX=2697049 GN=S PE=4 SV=1	1236	CMTSCCSCLKGCCSCGSCCKF
0.45	A0A6G9ZX63	tr|A0A6G9ZX63|A0A6G9ZX63_SARS2 Surface glycoprotein OS=Severe acute respiratory syndrome coronavirus 2 OX=2697049 GN=S PE=4 SV=1	1236	CMTSCCSCLKGCCSCGSCCKF
0.45	A0A6H2L9J3	tr|A0A6H2L9J3|A0A6H2L9J3_SARS2 Surface glycoprotein OS=Severe acute respiratory syndrome coronavirus 2 OX=2697049 GN=S PE=4 SV=1	1236	CMTSCCSCLKGCCSCGSCCKF
0.45	A0A6G9ZXM6	tr|A0A6G9ZXM6|A0A6G9ZXM6_SARS2 Surface glycoprotein OS=Severe acute respiratory syndrome coronavirus 2 OX=2697049 GN=S PE=4 SV=1	1236	CMTSCCSCLKGCCSCGSCCKF
0.4	A0A5K7VWR5	tr|A0A5K7VWR5|A0A5K7VWR5_CVHNL Spike glycoprotein OS=Human coronavirus NL63 OX=277944 GN=S PE=3 SV=1	1320	TGCCGCCNCLTSSMRGCCDCG
0.4	A0A5B9BH95	tr|A0A5B9BH95|A0A5B9BH95_CVHNL Spike glycoprotein OS=Human coronavirus NL63 OX=277944 GN=S PE=3 SV=1	1320	TGCCGCCNCLTSSMRGCCDCG
0.4	U3M7G5	tr|U3M7G5|U3M7G5_CVHNL Spike glycoprotein OS=Human coronavirus NL63 OX=277944 GN=S PE=3 SV=1	1320	TGCCGCCNCLTSSMRGCCDCG
0.4	A0A1V0E0U5	tr|A0A1V0E0U5|A0A1V0E0U5_CVHNL Spike glycoprotein OS=Human coronavirus NL63 OX=277944 GN=S PE=3 SV=1	1321	TGCCGCCNCLTSSMRGCCDCG
0.4	A0A5B9BHU7	tr|A0A5B9BHU7|A0A5B9BHU7_CVHNL Spike glycoprotein OS=Human coronavirus NL63 OX=277944 GN=S PE=3 SV=1	1320	TGCCGCCNCLTSSMRGCCDCG
0.4	H9EJ37	tr|H9EJ37|H9EJ37_CVHNL Spike glycoprotein OS=Human coronavirus NL63 OX=277944 GN=S PE=3 SV=1	1321	TGCCGCCNCLTSSMRGCCDCG
0.4	A0A384R2Q9	tr|A0A384R2Q9|A0A384R2Q9_CVHNL Spike glycoprotein OS=Human coronavirus NL63 OX=277944 GN=S PE=3 SV=1	1321	TGCCGCCNCLTSSMRGCCDCG
0.4	Q202H5	tr|Q202H5|Q202H5_SARS Spike glycoprotein OS=Severe acute respiratory syndrome coronavirus OX=694009 GN=S PE=3 SV=1	1218	CMTSCCSCLKGACSCGSCCKF
0.4	K4P2Y7	tr|K4P2Y7|K4P2Y7_CVHNL Spike glycoprotein OS=Human coronavirus NL63 OX=277944 GN=S PE=3 SV=1	1321	TGCCGCCNCLTSSMRGCCDCG
0.4	Q202G3	tr|Q202G3|Q202G3_SARS Spike glycoprotein OS=Severe acute respiratory syndrome coronavirus OX=694009 GN=S PE=3 SV=1	1218	CMTSCCSCLKGACSCGSCCKF
0.4	A0A1W6S788	tr|A0A1W6S788|A0A1W6S788_SARS Spike protein OS=Severe acute respiratory syndrome coronavirus OX=694009 PE=4 SV=1	1199	CMTSCCSCLKGVCSCGSCCKF
0.4	A0A1Y0EV12	tr|A0A1Y0EV12|A0A1Y0EV12_CVHNL Spike glycoprotein OS=Human coronavirus NL63 OX=277944 GN=S PE=3 SV=1	1320	TGCCGCCNCLTSSMRGCCDCG
0.4	Q202G8	tr|Q202G8|Q202G8_SARS Spike glycoprotein OS=Severe acute respiratory syndrome coronavirus OX=694009 GN=S PE=3 SV=1	1218	CMTSCCSCLKGACSCGSCCKF
0.4	A0A2U8JDM5	tr|A0A2U8JDM5|A0A2U8JDM5_CVHNL Spike glycoprotein OS=Human coronavirus NL63 OX=277944 GN=S PE=3 SV=1	1321	TGCCGCCNCLTSSMRGCCDCG
0.4	H9EJ93	tr|H9EJ93|H9EJ93_CVHNL Spike glycoprotein OS=Human coronavirus NL63 OX=277944 GN=S PE=3 SV=1	1321	TGCCGCCNCLTSSMRGCCDCG
0.4	A0A1V0PKX8	tr|A0A1V0PKX8|A0A1V0PKX8_CVHNL Spike glycoprotein OS=Human coronavirus NL63 OX=277944 GN=S PE=3 SV=1	1321	TGCCGCCNCLTSSMRGCCDCG
0.4	Q202E6	tr|Q202E6|Q202E6_SARS Spike glycoprotein OS=Severe acute respiratory syndrome coronavirus OX=694009 GN=S PE=3 SV=1	1218	CMTSCCSCLKGACSCGSCCKF
0.4	Q06Y16	tr|Q06Y16|Q06Y16_CVHNL Spike glycoprotein OS=Human coronavirus NL63 OX=277944 GN=S PE=3 SV=1	1320	TGCCGCCNCLTSSMRGCCDCG
0.4	J9TDZ0	tr|J9TDZ0|J9TDZ0_SARS Spike glycoprotein OS=Severe acute respiratory syndrome coronavirus OX=694009 GN=S PE=3 SV=1	1218	CMTSCCSCLKGACSCGSCCKF
0.4	H9EJ44	tr|H9EJ44|H9EJ44_CVHNL Spike glycoprotein OS=Human coronavirus NL63 OX=277944 GN=S PE=3 SV=1	1321	TGCCGCCNCLTSSMRGCCDCG
0.4	A0A384RK30	tr|A0A384RK30|A0A384RK30_CVHNL Spike glycoprotein OS=Human coronavirus NL63 OX=277944 GN=S PE=3 SV=1	1321	TGCCGCCNCLTSSMRGCCDCG
0.4	H9EJ51	tr|H9EJ51|H9EJ51_CVHNL Spike glycoprotein OS=Human coronavirus NL63 OX=277944 GN=S PE=3 SV=1	1321	TGCCGCCNCLTSSMRGCCDCG
0.4	A0A5B9MSJ9	tr|A0A5B9MSJ9|A0A5B9MSJ9_CVHNL Spike glycoprotein OS=Human coronavirus NL63 OX=277944 GN=S PE=3 SV=1	1320	TGCCGCCNCLTSSMRGCCDCG
0.4	Q19QX0	tr|Q19QX0|Q19QX0_SARS Spike glycoprotein OS=Severe acute respiratory syndrome coronavirus OX=694009 GN=S PE=3 SV=1	1218	CMTSCCSCLKGACSCGSCCKF
0.4	A0A1V0PKW6	tr|A0A1V0PKW6|A0A1V0PKW6_CVHNL Spike glycoprotein OS=Human coronavirus NL63 OX=277944 GN=S PE=3 SV=1	1321	TGCCGCCNCLTSSMRGCCDCG
0.4	Q202F2	tr|Q202F2|Q202F2_SARS Spike glycoprotein OS=Severe acute respiratory syndrome coronavirus OX=694009 GN=S PE=3 SV=1	1218	CMTSCCSCLKGACSCGSCCKF
0.4	H9EJ16	tr|H9EJ16|H9EJ16_CVHNL Spike glycoprotein OS=Human coronavirus NL63 OX=277944 GN=S PE=3 SV=1	1320	TGCCGCCNCLTSSMRGCCDCG
0.4	A0A5B9BGI8	tr|A0A5B9BGI8|A0A5B9BGI8_CVHNL Spike glycoprotein OS=Human coronavirus NL63 OX=277944 GN=S PE=3 SV=1	1320	TGCCGCCNCLTSSMRGCCDCG
0.4	A0A384RHS8	tr|A0A384RHS8|A0A384RHS8_CVHNL Spike glycoprotein OS=Human coronavirus NL63 OX=277944 GN=S PE=3 SV=1	1321	TGCCGCCNCLTSSMRGCCDCG
0.4	Q202H8	tr|Q202H8|Q202H8_SARS Spike glycoprotein OS=Severe acute respiratory syndrome coronavirus OX=694009 GN=S PE=3 SV=1	1218	CMTSCCSCLKGACSCGSCCKF
0.4	A0A5B9BIJ4	tr|A0A5B9BIJ4|A0A5B9BIJ4_CVHNL Spike glycoprotein OS=Human coronavirus NL63 OX=277944 GN=S PE=3 SV=1	1320	TGCCGCCNCLTSSMRGCCDCG
0.4	A0A2L0WQE1	tr|A0A2L0WQE1|A0A2L0WQE1_CVHNL Spike glycoprotein OS=Human coronavirus NL63 OX=277944 GN=S PE=3 SV=1	1320	TGCCGCCNCLTSSMRGCCDCG
0.4	A0A513ZT30	tr|A0A513ZT30|A0A513ZT30_CVHNL Spike glycoprotein OS=Human coronavirus NL63 OX=277944 GN=S PE=3 SV=1	1320	TGCCGCCNCLTSSMRGCCDCG
0.4	H9EJ86	tr|H9EJ86|H9EJ86_CVHNL Spike glycoprotein OS=Human coronavirus NL63 OX=277944 GN=S PE=3 SV=1	1321	TGCCGCCNCLTSSMRGCCDCG
0.4	A0A5B9MUE4	tr|A0A5B9MUE4|A0A5B9MUE4_CVHNL Spike glycoprotein OS=Human coronavirus NL63 OX=277944 GN=S PE=3 SV=1	1320	TGCCGCCNCLTSSMRGCCDCG
0.4	Q202G5	tr|Q202G5|Q202G5_SARS Spike glycoprotein OS=Severe acute respiratory syndrome coronavirus OX=694009 GN=S PE=3 SV=1	1218	CMTSCCSCLKGACSCGSCCKF
0.4	A0A384RHT2	tr|A0A384RHT2|A0A384RHT2_CVHNL Spike glycoprotein OS=Human coronavirus NL63 OX=277944 GN=S PE=3 SV=1	1321	TGCCGCCNCLTSSMRGCCDCG
0.4	H9EJW4	tr|H9EJW4|H9EJW4_CVHNL Spike glycoprotein OS=Human coronavirus NL63 OX=277944 GN=S PE=3 SV=1	1321	TGCCGCCNCLTSSMRGCCDCG
0.4	U3M6Q4	tr|U3M6Q4|U3M6Q4_CVHNL Spike glycoprotein OS=Human coronavirus NL63 OX=277944 GN=S PE=3 SV=1	1321	TGCCGCCNCLTSSMRGCCDCG
0.4	U3M6S0	tr|U3M6S0|U3M6S0_CVHNL Spike glycoprotein OS=Human coronavirus NL63 OX=277944 GN=S PE=3 SV=1	1321	TGCCGCCNCLTSSMRGCCDCG
0.4	H9EJA0	tr|H9EJA0|H9EJA0_CVHNL Spike glycoprotein OS=Human coronavirus NL63 OX=277944 GN=S PE=3 SV=1	1321	TGCCGCCNCLTSSMRGCCDCG
0.4	A0A1L2YVI8	tr|A0A1L2YVI8|A0A1L2YVI8_CVHNL Spike glycoprotein OS=Human coronavirus NL63 OX=277944 GN=S PE=3 SV=1	1321	TGCCGCCNCLTSSMRGCCDCG
0.4	A0A5B9BH24	tr|A0A5B9BH24|A0A5B9BH24_CVHNL Spike glycoprotein OS=Human coronavirus NL63 OX=277944 GN=S PE=3 SV=1	1321	TGCCGCCNCLTSSMRGCCDCG
0.4	U3M7H2	tr|U3M7H2|U3M7H2_CVHNL Spike glycoprotein OS=Human coronavirus NL63 OX=277944 GN=S PE=3 SV=1	1320	TGCCGCCNCLTSSMRGCCDCG
0.4	Q5MQD0	sp|Q5MQD0|SPIKE_CVHN1 Spike glycoprotein OS=Human coronavirus HKU1 (isolate N1) OX=443239 GN=S PE=1 SV=1	1321	ICCCTGCGSACFSKCHNCCDE
0.4	Q6Q1S2	sp|Q6Q1S2|SPIKE_CVHNL Spike glycoprotein OS=Human coronavirus NL63 OX=277944 GN=S PE=1 SV=1	1321	TGCCGCCNCLTSSMRGCCDCG
0.4	P36334	sp|P36334|SPIKE_CVHOC Spike glycoprotein OS=Human coronavirus OC43 OX=31631 GN=S PE=3 SV=1	1318	ICCCTGCGTSCFKKCGGCCDD
0.4	Q14EB0	sp|Q14EB0|SPIKE_CVHN2 Spike glycoprotein OS=Human coronavirus HKU1 (isolate N2) OX=443240 GN=S PE=3 SV=1	1316	ICCCTGCGSACFSKCHNCCDE
0.4	P69616	sp|P69616|ORF3_HEVBU Protein ORF3 OS=Hepatitis E virus genotype 1 (isolate Human/Burma) OX=31767 GN=ORF3 PE=1 SV=2	3	SRPCALGLFCCCSSCFCLCCP
0.4	Q81870	sp|Q81870|ORF3_HEVCH Protein ORF3 OS=Hepatitis E virus genotype 1 (isolate Human/China/HeBei/1987) OX=652674 GN=ORF3 PE=1 SV=2	3	SRPCALGLFCCCSSCFCLCCP
0.4	Q03499	sp|Q03499|ORF3_HEVME Protein ORF3 OS=Hepatitis E virus genotype 2 (isolate Human/Mexico) OX=31768 GN=ORF3 PE=1 SV=2	3	SPPCALGLFCCCSSCFCLCCP
0.4	P69617	sp|P69617|ORF3_HEVPA Protein ORF3 OS=Hepatitis E virus genotype 1 (isolate Human/Pakistan/Sar-55) OX=33774 GN=ORF3 PE=3 SV=2	3	SRPCALGLFCCCSSCFCLCCP
0.4	Q04612	sp|Q04612|ORF3_HEVMY Protein ORF3 OS=Hepatitis E virus genotype 1 (isolate Human/Myanmar/HEVNE8L) OX=31769 GN=ORF3 PE=3 SV=2	3	SRPCDLGLFCCCSSCFCLCCP
0.4	A0A0X9G8G2	tr|A0A0X9G8G2|A0A0X9G8G2_HEV Protein ORF3 (Fragment) OS=Hepatitis E virus OX=12461 GN=ORF3 PE=3 SV=1	1	CALGLFCCCSSCFCLCCPRHR
0.4	A0A481WCR7	tr|A0A481WCR7|A0A481WCR7_HEV Protein ORF3 (Fragment) OS=Hepatitis E virus OX=12461 PE=3 SV=1	2	GSPCALGLFCCCSSCFCLCCP
0.4	A0A109WVI3	tr|A0A109WVI3|A0A109WVI3_HEV Protein ORF3 (Fragment) OS=Hepatitis E virus OX=12461 GN=ORF3 PE=3 SV=1	1	CALGLFCCCSSCFCLCCPRHR
0.4	A0A650GCG9	tr|A0A650GCG9|A0A650GCG9_HEV Protein ORF3 OS=Hepatitis E virus OX=12461 PE=3 SV=1	11	GSPCALGLFCCCSSCFCLCCP
0.4	A0A481WC16	tr|A0A481WC16|A0A481WC16_HEV Protein ORF3 (Fragment) OS=Hepatitis E virus OX=12461 PE=3 SV=1	2	GSPCALGLFCCCSSCFCLCCP
0.4	A0A481WBX3	tr|A0A481WBX3|A0A481WBX3_HEV Protein ORF3 (Fragment) OS=Hepatitis E virus OX=12461 PE=3 SV=1	2	GSPCALGLFCCCSSCFCLCCP
0.4	A0A565D568	tr|A0A565D568|A0A565D568_HEV Protein ORF3 OS=Hepatitis E virus OX=12461 PE=3 SV=1	11	GSPCALGLFCCCSSCFCLCCP
0.4	K7NGB6	tr|K7NGB6|K7NGB6_HEV Protein ORF3 OS=Hepatitis E virus OX=12461 PE=3 SV=1	11	GSPCALGLFCCCSSCFCLCCP
0.4	G4V3R0	tr|G4V3R0|G4V3R0_HEV Protein ORF3 (Fragment) OS=Hepatitis E virus OX=12461 PE=3 SV=1	8	GSPCALGLFCCCSSCFCLCCP
0.4	Q911I5	tr|Q911I5|Q911I5_HEV Protein ORF3 OS=Hepatitis E virus OX=12461 PE=3 SV=1	11	GSPCALGLFCCCSSCFCLCCP
0.4	A0A481WBT4	tr|A0A481WBT4|A0A481WBT4_HEV Protein ORF3 (Fragment) OS=Hepatitis E virus OX=12461 PE=3 SV=1	2	GSPCALGLFCCCSSCFCLCCP
0.4	C7BCQ8	tr|C7BCQ8|C7BCQ8_HEV Protein ORF3 OS=Hepatitis E virus OX=12461 PE=3 SV=1	11	GSPCALGLFCCCSSCFCLCCP
0.4	A0A481WC94	tr|A0A481WC94|A0A481WC94_HEV Protein ORF3 (Fragment) OS=Hepatitis E virus OX=12461 PE=3 SV=1	2	GSPCALGLFCCCSSCFCLCCP
0.4	J9ST53	tr|J9ST53|J9ST53_HEV Protein ORF3 OS=Hepatitis E virus OX=12461 PE=3 SV=1	11	GSPCALGLFCCCSSCFCLCCP
0.4	K9MNW4	tr|K9MNW4|K9MNW4_HEV Protein ORF3 (Fragment) OS=Hepatitis E virus OX=12461 PE=3 SV=1	2	GPPCALGLFCCCSSCFCLCCP
0.4	K9MPW9	tr|K9MPW9|K9MPW9_HEV Protein ORF3 (Fragment) OS=Hepatitis E virus OX=12461 PE=3 SV=1	2	GSPCALGLFCCCSSCFCLCCP
0.4	A0A481WBR0	tr|A0A481WBR0|A0A481WBR0_HEV Protein ORF3 (Fragment) OS=Hepatitis E virus OX=12461 PE=3 SV=1	2	GSPCALGLFCCCSSCFCLCCP
0.4	A0A1C9ZMA4	tr|A0A1C9ZMA4|A0A1C9ZMA4_HEV Protein ORF3 OS=Hepatitis E virus OX=12461 GN=ORF3 PE=3 SV=1	11	GSPCALGLFCCCSSCFCLCCP
0.4	A0A125R929	tr|A0A125R929|A0A125R929_HEV Protein ORF3 OS=Hepatitis E virus OX=12461 PE=3 SV=1	11	GSSCALGLFCCCSSCFCLCCP
0.4	A0A0X9H8B4	tr|A0A0X9H8B4|A0A0X9H8B4_HEV Protein ORF3 (Fragment) OS=Hepatitis E virus OX=12461 GN=ORF3 PE=3 SV=1	1	CALGLFCCCSSCFCLCCPRHR
0.4	A0A0K2JK65	tr|A0A0K2JK65|A0A0K2JK65_HEV Protein ORF3 (Fragment) OS=Hepatitis E virus OX=12461 PE=3 SV=1	11	GSPCALGLFCCCSSCFCLCCP
0.4	A0A481WBL1	tr|A0A481WBL1|A0A481WBL1_HEV Protein ORF3 (Fragment) OS=Hepatitis E virus OX=12461 PE=3 SV=1	2	GSPCALGLFCCCSSCFCLCCP
0.4	A0A481WC49	tr|A0A481WC49|A0A481WC49_HEV Protein ORF3 (Fragment) OS=Hepatitis E virus OX=12461 PE=3 SV=1	2	GSPCALGLFCCCSSCFCLCCP
0.4	A0A481WBK6	tr|A0A481WBK6|A0A481WBK6_HEV Protein ORF3 (Fragment) OS=Hepatitis E virus OX=12461 PE=3 SV=1	2	GSPCALGLFCCCSSCFCLCCP
0.4	A0A344X7K5	tr|A0A344X7K5|A0A344X7K5_HEV Protein ORF3 (Fragment) OS=Hepatitis E virus OX=12461 PE=3 SV=1	11	GSPCALGLFCCCSSCFCLCCP
0.4	A0A481WC11	tr|A0A481WC11|A0A481WC11_HEV Protein ORF3 (Fragment) OS=Hepatitis E virus OX=12461 PE=3 SV=1	2	GSPCALGLFCCCSSCFCLCCP
0.4	A0A024CDT2	tr|A0A024CDT2|A0A024CDT2_HEV Protein ORF3 (Fragment) OS=Hepatitis E virus OX=12461 PE=3 SV=1	3	SRPCALGLFCCCSSCFCLCCP
0.4	A0A481WCU9	tr|A0A481WCU9|A0A481WCU9_HEV Protein ORF3 (Fragment) OS=Hepatitis E virus OX=12461 PE=3 SV=1	2	GSPCALGLFCCCSSCFCLCCP
0.4	A0A1B1UZR2	tr|A0A1B1UZR2|A0A1B1UZR2_HEV Protein ORF3 OS=Hepatitis E virus OX=12461 PE=3 SV=1	11	GSPCALGLFCCCSSCFCLCCP
0.4	A0A481WBQ4	tr|A0A481WBQ4|A0A481WBQ4_HEV Protein ORF3 (Fragment) OS=Hepatitis E virus OX=12461 PE=3 SV=1	2	GSPCALGLFCCCSSCFCLCCP
0.4	A0A411PYU4	tr|A0A411PYU4|A0A411PYU4_HEV Protein ORF3 OS=Hepatitis E virus OX=12461 PE=3 SV=1	11	GSPCALGLFCCCSSCFCLCCP
0.4	A0A411PYU9	tr|A0A411PYU9|A0A411PYU9_HEV Protein ORF3 OS=Hepatitis E virus OX=12461 PE=3 SV=1	11	GSPCALGLFCCCSSCFCLCCP
0.4	B7X6L8	tr|B7X6L8|B7X6L8_HEV Protein ORF3 OS=Hepatitis E virus OX=12461 PE=3 SV=1	11	GSPCALGLFCCCSSCFCLCCP
0.4	B2NIP3	tr|B2NIP3|B2NIP3_HEV Protein ORF3 OS=Hepatitis E virus OX=12461 PE=3 SV=1	11	GSPCALGLFCCCSSCFCLCCP
0.4	A0A481WC35	tr|A0A481WC35|A0A481WC35_HEV Protein ORF3 (Fragment) OS=Hepatitis E virus OX=12461 PE=3 SV=1	2	GSPCALGLFCCCSSCFCLCCP
0.4	A0A481WBM7	tr|A0A481WBM7|A0A481WBM7_HEV Protein ORF3 (Fragment) OS=Hepatitis E virus OX=12461 PE=3 SV=1	2	GSPCALGLFCCCSSCFCLCCP
0.4	A0A481WC81	tr|A0A481WC81|A0A481WC81_HEV Protein ORF3 (Fragment) OS=Hepatitis E virus OX=12461 PE=3 SV=1	2	GSPCALGLFCCCSSCFCLCCP
0.4	A0A481WCE7	tr|A0A481WCE7|A0A481WCE7_HEV Protein ORF3 (Fragment) OS=Hepatitis E virus OX=12461 PE=3 SV=1	2	GSPCALGLFCCCSSCFCLCCP
0.4	A0A1W6AZJ2	tr|A0A1W6AZJ2|A0A1W6AZJ2_HEV Protein ORF3 OS=Hepatitis E virus OX=12461 PE=3 SV=1	11	GSPCALGLFCCCSSCVCLCCP
0.4	E9N3B8	tr|E9N3B8|E9N3B8_HEV Protein ORF3 OS=Hepatitis E virus OX=12461 PE=3 SV=1	2	GSPCALGLFCCCSSCFCLCCP
0.4	H9BC86	tr|H9BC86|H9BC86_HEV Protein ORF3 (Fragment) OS=Hepatitis E virus OX=12461 PE=3 SV=1	6	GSSCALGLFCCCSSCFCLCCP
0.4	C7BCR1	tr|C7BCR1|C7BCR1_HEV Protein ORF3 OS=Hepatitis E virus OX=12461 PE=3 SV=1	11	GSPCALGLFCCCSSCVCLCCP
0.4	A0A5P8KQK3	tr|A0A5P8KQK3|A0A5P8KQK3_HEV Protein ORF3 (Fragment) OS=Hepatitis E virus OX=12461 PE=3 SV=1	2	GSPCALGLFCCCSSCFCLCCP
0.4	Q0WYA8	tr|Q0WYA8|Q0WYA8_HEV Protein ORF3 OS=Hepatitis E virus OX=12461 PE=3 SV=1	11	GTPCALGLFCCCSSCFCLCCP
0.4	A0A481WC59	tr|A0A481WC59|A0A481WC59_HEV Protein ORF3 (Fragment) OS=Hepatitis E virus OX=12461 PE=3 SV=1	2	GSPCALGLFCCCSSCFCLCCP
0.4	A0A3S8NTZ2	tr|A0A3S8NTZ2|A0A3S8NTZ2_HEV Protein ORF3 OS=Hepatitis E virus OX=12461 PE=3 SV=1	11	GSPCALGLFCCCSSCFCLCCP
0.4	S4VH08	tr|S4VH08|S4VH08_HEV Protein ORF3 (Fragment) OS=Hepatitis E virus OX=12461 PE=3 SV=1	7	GSPCALGLFCCCSSCFCLCCP
0.4	A0A411PYY2	tr|A0A411PYY2|A0A411PYY2_HEV Protein ORF3 OS=Hepatitis E virus OX=12461 PE=3 SV=1	11	GSPCALGLFCCCSSCFCLCCP
0.4	H9BC92	tr|H9BC92|H9BC92_HEV Protein ORF3 (Fragment) OS=Hepatitis E virus OX=12461 PE=3 SV=1	6	GSPCALGLFCCCSSCFCLCCP
0.4	A0A481WBH8	tr|A0A481WBH8|A0A481WBH8_HEV Protein ORF3 (Fragment) OS=Hepatitis E virus OX=12461 PE=3 SV=1	2	GSPCALGLFCCCSSCFCLCCP
0.4	K9MPP9	tr|K9MPP9|K9MPP9_HEV Protein ORF3 (Fragment) OS=Hepatitis E virus OX=12461 PE=3 SV=1	2	GSPCALGLFCCCSSCFCLCCP
0.4	K9MQ73	tr|K9MQ73|K9MQ73_HEV Protein ORF3 (Fragment) OS=Hepatitis E virus OX=12461 PE=3 SV=1	2	GPPCALGLFCCCSSCFCLCCP
0.4	A0A109P4V4	tr|A0A109P4V4|A0A109P4V4_HEV Protein ORF3 OS=Hepatitis E virus OX=12461 GN=ORF3 PE=3 SV=2	11	GSPCALGLFCCCSSCFCLCCP
0.4	A0A481WCW3	tr|A0A481WCW3|A0A481WCW3_HEV Protein ORF3 (Fragment) OS=Hepatitis E virus OX=12461 PE=3 SV=1	2	GSPCALGLFCCCSSCFCLCCP
0.4	K9MNW9	tr|K9MNW9|K9MNW9_HEV Protein ORF3 (Fragment) OS=Hepatitis E virus OX=12461 PE=3 SV=1	2	GSPCALGLFCCCSSCFCLCCP
0.4	A0A076FNV4	tr|A0A076FNV4|A0A076FNV4_HEV Protein ORF3 OS=Hepatitis E virus OX=12461 PE=3 SV=1	11	GSPCALGLFCCCSSCFCLCCP
0.4	A0A481WBM0	tr|A0A481WBM0|A0A481WBM0_HEV Protein ORF3 (Fragment) OS=Hepatitis E virus OX=12461 PE=3 SV=1	2	GSPCALGLFCCCSSCFCLCCP
0.4	V9SFL6	tr|V9SFL6|V9SFL6_HEV Protein ORF3 OS=Hepatitis E virus OX=12461 PE=3 SV=1	11	GSPCALGLFCCCSSCFCLCCP
0.4	A0A411PYU8	tr|A0A411PYU8|A0A411PYU8_HEV Protein ORF3 OS=Hepatitis E virus OX=12461 PE=3 SV=1	11	GSPCALGLFCCCSSCFCLCCP
0.4	A0A411PYS3	tr|A0A411PYS3|A0A411PYS3_HEV Protein ORF3 OS=Hepatitis E virus OX=12461 PE=3 SV=1	11	GSPCALGLFCCCSSCFCLCCP
0.4	A0A3Q8QDA6	tr|A0A3Q8QDA6|A0A3Q8QDA6_HEV Protein ORF3 OS=Hepatitis E virus OX=12461 PE=3 SV=1	11	GPPCALGLFCCCSSCFCLCCP
0.4	F8WRK4	tr|F8WRK4|F8WRK4_HEV Protein ORF3 OS=Hepatitis E virus OX=12461 PE=3 SV=1	11	GSPCALGLFCCCSSCFCLCCP
0.4	W6AY30	tr|W6AY30|W6AY30_HEV Protein ORF3 (Fragment) OS=Hepatitis E virus OX=12461 PE=3 SV=1	8	GSPCALGLFCCCSSCFCLCCP
0.4	A0A481WBH0	tr|A0A481WBH0|A0A481WBH0_HEV Protein ORF3 (Fragment) OS=Hepatitis E virus OX=12461 PE=3 SV=1	2	GSPCALGLFCCCSSCFCLCCP
0.4	F4YIB7	tr|F4YIB7|F4YIB7_HEV Protein ORF3 OS=Hepatitis E virus OX=12461 PE=3 SV=1	11	GSPCALGLFCCCSSCFCLCCP
0.4	B8XXH8	tr|B8XXH8|B8XXH8_HEV Protein ORF3 OS=Hepatitis E virus OX=12461 PE=3 SV=1	3	SRPCALGLFCCCSSCFCLCCP
0.4	A0A481WC83	tr|A0A481WC83|A0A481WC83_HEV Protein ORF3 (Fragment) OS=Hepatitis E virus OX=12461 PE=3 SV=1	2	GSPCALGLFCCCSSCFCLCCP
0.4	A0A481WBU7	tr|A0A481WBU7|A0A481WBU7_HEV Protein ORF3 (Fragment) OS=Hepatitis E virus OX=12461 PE=3 SV=1	2	GSPCALGLFCCCSSCFCLCCP
0.4	A0A481WBR2	tr|A0A481WBR2|A0A481WBR2_HEV Protein ORF3 (Fragment) OS=Hepatitis E virus OX=12461 PE=3 SV=1	2	GSPCALGLFCCCSSCFCLCCP
0.4	A0A481WC32	tr|A0A481WC32|A0A481WC32_HEV Protein ORF3 (Fragment) OS=Hepatitis E virus OX=12461 PE=3 SV=1	2	GSPCALGLFCCCSSCFCLCCP
0.4	A0A481WBZ6	tr|A0A481WBZ6|A0A481WBZ6_HEV Protein ORF3 (Fragment) OS=Hepatitis E virus OX=12461 PE=3 SV=1	2	GSPCALGLFCCCSSCFCLCCP
0.4	A0A481WBG3	tr|A0A481WBG3|A0A481WBG3_HEV Protein ORF3 (Fragment) OS=Hepatitis E virus OX=12461 PE=3 SV=1	2	GSSCALGLFCCCSSCFCLCCP
0.4	A0A481WC50	tr|A0A481WC50|A0A481WC50_HEV Protein ORF3 (Fragment) OS=Hepatitis E virus OX=12461 PE=3 SV=1	2	GPPCALGLFCCCSSCFCLCCP
0.4	A0A120H3Z4	tr|A0A120H3Z4|A0A120H3Z4_HEV Protein ORF3 (Fragment) OS=Hepatitis E virus OX=12461 GN=ORF3 PE=3 SV=1	1	CALGLFCCCSSCFCLCCPRHR
0.4	A0A481WBX4	tr|A0A481WBX4|A0A481WBX4_HEV Protein ORF3 (Fragment) OS=Hepatitis E virus OX=12461 PE=3 SV=1	2	GSPCALGLFCCCSSCFCLCCP
0.4	A0A411PYX4	tr|A0A411PYX4|A0A411PYX4_HEV Protein ORF3 OS=Hepatitis E virus OX=12461 PE=3 SV=1	11	GSPCALGLFCCCSSCFCLCCP
0.4	A0A6H1XM00	tr|A0A6H1XM00|A0A6H1XM00_SARS2 Surface glycoprotein OS=Severe acute respiratory syndrome coronavirus 2 OX=2697049 GN=S PE=4 SV=1	1235	GGMTSCCSCLKGCCSCGSCCK
0.4	A0A4P6D8U7	tr|A0A4P6D8U7|A0A4P6D8U7_HEV Protein ORF3 OS=Hepatitis E virus OX=12461 PE=3 SV=1	12	SRPCALGLFCCCSSCFCLCCP
0.4	B7X6I5	tr|B7X6I5|B7X6I5_HEV Protein ORF3 OS=Hepatitis E virus OX=12461 PE=3 SV=1	11	GSPCALGLFCCCSSCFCLCCP
0.4	A0A481WC53	tr|A0A481WC53|A0A481WC53_HEV Protein ORF3 (Fragment) OS=Hepatitis E virus OX=12461 PE=3 SV=1	2	GSPCALGLFCCCSSCFCLCCP
0.4	K9MNX8	tr|K9MNX8|K9MNX8_HEV Protein ORF3 (Fragment) OS=Hepatitis E virus OX=12461 PE=3 SV=1	2	GSPCALGLFCCCSSCFCLCCP
0.4	A0A385KZV7	tr|A0A385KZV7|A0A385KZV7_HEV Protein ORF3 OS=Hepatitis E virus OX=12461 PE=3 SV=1	11	GSPCALGLFCCCSSCFCLCCP
0.4	A0A481WC25	tr|A0A481WC25|A0A481WC25_HEV Protein ORF3 (Fragment) OS=Hepatitis E virus OX=12461 PE=3 SV=1	2	GSPCALGLFCCCSSCFCLCCP
0.4	A0A481WBY9	tr|A0A481WBY9|A0A481WBY9_HEV Protein ORF3 (Fragment) OS=Hepatitis E virus OX=12461 PE=3 SV=1	2	GSPCALGLFCCCSSCFCLCCP
0.4	A0A481WBU4	tr|A0A481WBU4|A0A481WBU4_HEV Protein ORF3 (Fragment) OS=Hepatitis E virus OX=12461 PE=3 SV=1	2	GSPCALGLFCCCSSCFCLCCP
0.4	F1SZZ8	tr|F1SZZ8|F1SZZ8_HEV Protein ORF3 OS=Hepatitis E virus OX=12461 PE=3 SV=1	11	GSPCALGLFCCCSSCFCLCCP
0.4	K9MPY0	tr|K9MPY0|K9MPY0_HEV Protein ORF3 (Fragment) OS=Hepatitis E virus OX=12461 PE=3 SV=1	2	GSPCALGLFCCCSSCFCLCCP
0.4	O91854	tr|O91854|O91854_HEV Protein ORF3 OS=Hepatitis E virus OX=12461 PE=3 SV=1	12	SRPCALGLFCCCSSCFCLCCP
0.4	A0A411PYX8	tr|A0A411PYX8|A0A411PYX8_HEV Protein ORF3 OS=Hepatitis E virus OX=12461 PE=3 SV=1	11	GSPCALGLFCCCSSCFCLCCP
0.4	A0A481WBV9	tr|A0A481WBV9|A0A481WBV9_HEV Protein ORF3 (Fragment) OS=Hepatitis E virus OX=12461 PE=3 SV=1	2	GSPCALGLFCCCSSCFCLCCP
0.4	Q8JJM5	tr|Q8JJM5|Q8JJM5_HEV Protein ORF3 OS=Hepatitis E virus OX=12461 PE=3 SV=1	11	GSPCALGLFCCCSSCFCLCCP
0.4	A0A411PYR7	tr|A0A411PYR7|A0A411PYR7_HEV Protein ORF3 OS=Hepatitis E virus OX=12461 PE=3 SV=1	11	GSPCALGLFCCCSSCFCLCCP
0.4	K9MPR1	tr|K9MPR1|K9MPR1_HEV Protein ORF3 (Fragment) OS=Hepatitis E virus OX=12461 PE=3 SV=1	2	GSPCALGLFCCCSSCFCLCCP
0.4	A0A481WC82	tr|A0A481WC82|A0A481WC82_HEV Protein ORF3 (Fragment) OS=Hepatitis E virus OX=12461 PE=3 SV=1	2	GSPCALGLFCCCSSCFCLCCP
0.4	A0A481WC30	tr|A0A481WC30|A0A481WC30_HEV Protein ORF3 (Fragment) OS=Hepatitis E virus OX=12461 PE=3 SV=1	2	GSPCALGLFCCCSSCFCLCCP
0.4	A0A024CD69	tr|A0A024CD69|A0A024CD69_HEV Protein ORF3 (Fragment) OS=Hepatitis E virus OX=12461 PE=3 SV=1	3	SRPCALGLFCCCSSCFCLCCP
0.4	A0A481WC27	tr|A0A481WC27|A0A481WC27_HEV Protein ORF3 (Fragment) OS=Hepatitis E virus OX=12461 PE=3 SV=1	2	GSPCALGLFCCCSSCFCLCCP
0.4	H9BC76	tr|H9BC76|H9BC76_HEV Protein ORF3 (Fragment) OS=Hepatitis E virus OX=12461 PE=3 SV=1	6	GSSCALGLFCCCSSCFCLCCP
0.4	A0A481WBK1	tr|A0A481WBK1|A0A481WBK1_HEV Protein ORF3 (Fragment) OS=Hepatitis E virus OX=12461 PE=3 SV=1	2	GSPCALGLFCCCSSCFCLCCP
0.4	A0A481WBV8	tr|A0A481WBV8|A0A481WBV8_HEV Protein ORF3 (Fragment) OS=Hepatitis E virus OX=12461 PE=3 SV=1	2	GSPCALGLFCCCSSCFCLCCP
0.4	A0A481WCA8	tr|A0A481WCA8|A0A481WCA8_HEV Protein ORF3 (Fragment) OS=Hepatitis E virus OX=12461 PE=3 SV=1	2	GSPCALGLFCCCSSCFCLCCP
0.4	A0A1B1H4F5	tr|A0A1B1H4F5|A0A1B1H4F5_HEV Protein ORF3 OS=Hepatitis E virus OX=12461 PE=3 SV=1	11	GSSCALGLFCCCSSCFCLCCP
0.4	K4F5Y2	tr|K4F5Y2|K4F5Y2_HEV Protein ORF3 OS=Hepatitis E virus OX=12461 PE=3 SV=1	3	SRPCALGLFCCCSSCFCLCCP
0.4	I2E678	tr|I2E678|I2E678_HEV Protein ORF3 OS=Hepatitis E virus OX=12461 PE=3 SV=2	3	TRPCALGLFCCCSSCFCLCCP
0.4	A0A481WC03	tr|A0A481WC03|A0A481WC03_HEV Protein ORF3 (Fragment) OS=Hepatitis E virus OX=12461 PE=3 SV=1	2	GSPCALGLFCCCSSCFCLCCP
0.4	A0A481WBX6	tr|A0A481WBX6|A0A481WBX6_HEV Protein ORF3 (Fragment) OS=Hepatitis E virus OX=12461 PE=3 SV=1	2	GSPCALGLFCCCSSCFCLCCP
0.4	S4VMV1	tr|S4VMV1|S4VMV1_HEV Protein ORF3 (Fragment) OS=Hepatitis E virus OX=12461 PE=3 SV=1	7	GSPCALGLFCCCSSCFCLCCP
0.4	A0A076N1J7	tr|A0A076N1J7|A0A076N1J7_HEV Protein ORF3 (Fragment) OS=Hepatitis E virus OX=12461 PE=3 SV=1	11	GSPCALGLFCCCSSCFCLCCP
0.4	K9MPQ5	tr|K9MPQ5|K9MPQ5_HEV Protein ORF3 (Fragment) OS=Hepatitis E virus OX=12461 PE=3 SV=1	2	GSPCALGLFCCCSSCFCLCCP
0.4	A0A2R4PMF3	tr|A0A2R4PMF3|A0A2R4PMF3_HEV Protein ORF3 (Fragment) OS=Hepatitis E virus OX=12461 PE=3 SV=1	11	GSPCALGLFCCCSSCFCLCCP
0.4	Q0QC52	tr|Q0QC52|Q0QC52_HEV Protein ORF3 OS=Hepatitis E virus OX=12461 GN=ORF3 PE=3 SV=1	11	GSPCALGLFCCCSSCFCLCCP
0.4	A0A024CD74	tr|A0A024CD74|A0A024CD74_HEV Protein ORF3 (Fragment) OS=Hepatitis E virus OX=12461 PE=3 SV=1	3	SRPCALGLFCCCSSCFCLCCP
0.4	A0A481WBQ7	tr|A0A481WBQ7|A0A481WBQ7_HEV Protein ORF3 (Fragment) OS=Hepatitis E virus OX=12461 PE=3 SV=1	2	GSPCALGLFCCCSSCFCLCCP
0.4	A0A024CDR0	tr|A0A024CDR0|A0A024CDR0_HEV Protein ORF3 (Fragment) OS=Hepatitis E virus OX=12461 PE=3 SV=1	3	SRPCALGLFCCCSSCFCLCCP
0.4	K9MQ69	tr|K9MQ69|K9MQ69_HEV Protein ORF3 (Fragment) OS=Hepatitis E virus OX=12461 PE=3 SV=1	2	GSPCALGLFCCCSSCFCLCCP
0.4	B7X6M1	tr|B7X6M1|B7X6M1_HEV Protein ORF3 OS=Hepatitis E virus OX=12461 PE=3 SV=1	11	GSPCALGLFCCCSSCFCLCCP
0.4	Q202F9	tr|Q202F9|Q202F9_SARS Spike glycoprotein OS=Severe acute respiratory syndrome coronavirus OX=694009 GN=S PE=3 SV=1	1218	CMTSCCSCLKGACSCGSCCKF
0.4	A0A411PZ42	tr|A0A411PZ42|A0A411PZ42_HEV Protein ORF3 OS=Hepatitis E virus OX=12461 PE=3 SV=1	11	GSPCALGLFCCCSSCFCLCCP
0.4	A0A482IE04	tr|A0A482IE04|A0A482IE04_HEV Protein ORF3 OS=Hepatitis E virus OX=12461 PE=3 SV=1	8	GSPCALGLFCCCSSCFCLCCP
0.4	A0A411PZ08	tr|A0A411PZ08|A0A411PZ08_HEV Protein ORF3 OS=Hepatitis E virus OX=12461 PE=3 SV=1	12	SRPCALGLFCCCSSCFCLCCP
0.4	A0A384QXZ7	tr|A0A384QXZ7|A0A384QXZ7_CVHNL Spike glycoprotein OS=Human coronavirus NL63 OX=277944 GN=S PE=3 SV=1	1321	TGCCGCCNCLTSSMRGCCDCG
0.4	H9ZGC6	tr|H9ZGC6|H9ZGC6_HEV Protein ORF3 OS=Hepatitis E virus OX=12461 PE=3 SV=1	11	GSPCALGLFCCCSSCFCLCCP
0.4	B7XA50	tr|B7XA50|B7XA50_HEV Protein ORF3 OS=Hepatitis E virus OX=12461 PE=3 SV=1	11	GSPCALGLFCCCSSCFCLCCP
0.4	A0A565D565	tr|A0A565D565|A0A565D565_HEV Protein ORF3 OS=Hepatitis E virus OX=12461 PE=3 SV=1	11	GSPCALGLFCCCSSCFCLCCP
0.4	Q202F4	tr|Q202F4|Q202F4_SARS Spike glycoprotein OS=Severe acute respiratory syndrome coronavirus OX=694009 GN=S PE=3 SV=1	1218	CMTSCCSCLKGACSCGSCCKF
0.4	Q202E9	tr|Q202E9|Q202E9_SARS Spike glycoprotein OS=Severe acute respiratory syndrome coronavirus OX=694009 GN=S PE=3 SV=1	1218	CMTSCCSCLKGACSCGSCCKF
0.4	A0A2D1CPJ0	tr|A0A2D1CPJ0|A0A2D1CPJ0_HEV Protein ORF3 OS=Hepatitis E virus OX=12461 PE=3 SV=1	11	GSPCALGLFCCCSSCFCLCCP
0.4	B7X6I8	tr|B7X6I8|B7X6I8_HEV Protein ORF3 OS=Hepatitis E virus OX=12461 PE=3 SV=1	11	GSPCALGLFCCCSSCFCLCCP
0.4	Q06Y10	tr|Q06Y10|Q06Y10_CVHNL Spike glycoprotein OS=Human coronavirus NL63 OX=277944 GN=S PE=3 SV=1	1320	TGCCGCCNCLTSSMRGCCDCG
0.4	Q5L4L6	tr|Q5L4L6|Q5L4L6_HEV Protein ORF3 OS=Hepatitis E virus OX=12461 PE=3 SV=1	11	GSPCALGLFCCCSSCFCLCCP
0.4	A0A2P1E8C8	tr|A0A2P1E8C8|A0A2P1E8C8_HEV Protein ORF3 OS=Hepatitis E virus OX=12461 PE=3 SV=1	11	GSPCALGLFCCCSSCFCLCCP
0.4	E9N3C1	tr|E9N3C1|E9N3C1_HEV Protein ORF3 OS=Hepatitis E virus OX=12461 PE=3 SV=1	2	GSPCALGLFCCCSSCFCLCCP
0.4	A0A0P0G321	tr|A0A0P0G321|A0A0P0G321_CVHNL Spike glycoprotein OS=Human coronavirus NL63 OX=277944 GN=S PE=3 SV=1	1321	TGCCGCCNCLTSSMRGCCDCG
0.4	A0A455RLT6	tr|A0A455RLT6|A0A455RLT6_HEV Protein ORF3 OS=Hepatitis E virus OX=12461 PE=3 SV=1	11	GSPCALGLFCCCSSCFCLCCP
0.4	A0A411PYZ9	tr|A0A411PYZ9|A0A411PYZ9_HEV Protein ORF3 OS=Hepatitis E virus OX=12461 PE=3 SV=1	11	GSPCALGLFCCCSSCFCLCCP
0.4	S6C6A1	tr|S6C6A1|S6C6A1_HEV Protein ORF3 OS=Hepatitis E virus OX=12461 PE=3 SV=1	11	GSPCALGLFCCCSSCFCLCCP
0.4	Q202E5	tr|Q202E5|Q202E5_SARS Spike glycoprotein OS=Severe acute respiratory syndrome coronavirus OX=694009 GN=S PE=3 SV=1	1218	CMTSCCSCLKGACSCGSCCKF
0.4	A7J8L4	tr|A7J8L4|A7J8L4_SARS Spike glycoprotein OS=Severe acute respiratory syndrome coronavirus OX=694009 GN=S PE=3 SV=1	1218	CMTSCCSCLKGACSCGSCCKF
0.4	Q77X79	tr|Q77X79|Q77X79_HEV Protein ORF3 OS=Hepatitis E virus OX=12461 PE=3 SV=1	12	SRPCALGLFCCCSSCFCLCCP
0.4	K4F4L9	tr|K4F4L9|K4F4L9_HEV Protein ORF3 OS=Hepatitis E virus OX=12461 PE=3 SV=1	3	SRPCALGLFCCCSSCFCLCCP
0.4	H9EJ72	tr|H9EJ72|H9EJ72_CVHNL Spike glycoprotein OS=Human coronavirus NL63 OX=277944 GN=S PE=3 SV=1	1321	TGCCGCCNCLTSSMRGCCDCG
0.4	H9EJV2	tr|H9EJV2|H9EJV2_CVHNL Spike glycoprotein OS=Human coronavirus NL63 OX=277944 GN=S PE=3 SV=1	1321	TGCCGCCNCLTSSMRGCCDCG
0.4	A0A1V0PKX1	tr|A0A1V0PKX1|A0A1V0PKX1_CVHNL Spike glycoprotein OS=Human coronavirus NL63 OX=277944 GN=S PE=3 SV=1	1321	TGCCGCCNCLTSSMRGCCDCG
0.4	A0A565D583	tr|A0A565D583|A0A565D583_HEV Protein ORF3 OS=Hepatitis E virus OX=12461 PE=3 SV=1	11	GSPCALGLFCCCSSCFCLCCP
0.4	A0A411PYZ8	tr|A0A411PYZ8|A0A411PYZ8_HEV Protein ORF3 OS=Hepatitis E virus OX=12461 PE=3 SV=1	12	SRPCALGLFCCCSSCFCLCCP
0.4	A0A5K7W0I8	tr|A0A5K7W0I8|A0A5K7W0I8_CVHNL Spike glycoprotein OS=Human coronavirus NL63 OX=277944 GN=S PE=3 SV=1	1320	TGCCGCCNCLTSSMRGCCDCG
0.4	A0A650GBZ0	tr|A0A650GBZ0|A0A650GBZ0_HEV Protein ORF3 OS=Hepatitis E virus OX=12461 PE=3 SV=1	11	GSPCALGLFCCCSSCFCLCCP
0.4	A0A0K1D6F6	tr|A0A0K1D6F6|A0A0K1D6F6_CVHNL Spike glycoprotein OS=Human coronavirus NL63 OX=277944 GN=S PE=3 SV=1	1321	TGCCGCCNCLTSSMRGCCDCG
0.4	A0A4P6DI47	tr|A0A4P6DI47|A0A4P6DI47_HEV Protein ORF3 OS=Hepatitis E virus OX=12461 PE=3 SV=1	12	SRPCALGLFCCCSSCFCLCCP
0.4	H2D5V7	tr|H2D5V7|H2D5V7_HEV Protein ORF3 OS=Hepatitis E virus OX=12461 PE=3 SV=1	2	GSPCALGLFCCCSSCFCLCCP
0.4	A0A411PYX1	tr|A0A411PYX1|A0A411PYX1_HEV Protein ORF3 OS=Hepatitis E virus OX=12461 PE=3 SV=1	11	GSPCALGLFCCCSSCFCLCCP
0.4	B7X6L5	tr|B7X6L5|B7X6L5_HEV Protein ORF3 OS=Hepatitis E virus OX=12461 PE=3 SV=1	11	GSPCALGLFCCCSSCFCLCCP
0.4	A0A451G3U0	tr|A0A451G3U0|A0A451G3U0_HEV Protein ORF3 OS=Hepatitis E virus OX=12461 PE=3 SV=1	2	GTSCALGLYCCCSSCFCLCCP
0.4	J9SFL2	tr|J9SFL2|J9SFL2_SARS Spike glycoprotein OS=Severe acute respiratory syndrome coronavirus OX=694009 GN=S PE=3 SV=1	1218	CMTSCCSCLKGACSCGSCCKF
0.4	K4FAT3	tr|K4FAT3|K4FAT3_HEV Protein ORF3 OS=Hepatitis E virus OX=12461 GN=ORF3 PE=3 SV=1	3	SRPCALGLFCCCSSCFCLCCP
0.4	B7X6K3	tr|B7X6K3|B7X6K3_HEV Protein ORF3 OS=Hepatitis E virus OX=12461 PE=3 SV=1	11	GSPCALGLFCCCSSCFCLCCP
0.4	I7CMD1	tr|I7CMD1|I7CMD1_CVHNL Spike glycoprotein OS=Human coronavirus NL63 OX=277944 GN=S PE=3 SV=1	1321	TGCCGCCNCLTSSMRGCCDCG
0.4	A0A1V0E0W0	tr|A0A1V0E0W0|A0A1V0E0W0_CVHNL Spike glycoprotein OS=Human coronavirus NL63 OX=277944 GN=S PE=3 SV=1	1321	TGCCGCCNCLTSSMRGCCDCG
0.4	U3M6U5	tr|U3M6U5|U3M6U5_CVHNL Spike glycoprotein OS=Human coronavirus NL63 OX=277944 GN=S PE=3 SV=1	1320	TGCCGCCNCLTSSMRGCCDCG
0.4	Q202F5	tr|Q202F5|Q202F5_SARS Spike glycoprotein OS=Severe acute respiratory syndrome coronavirus OX=694009 GN=S PE=3 SV=1	1218	CMTSCCSCLKGACSCGSCCKF
0.4	A0A411PYV0	tr|A0A411PYV0|A0A411PYV0_HEV Protein ORF3 OS=Hepatitis E virus OX=12461 PE=3 SV=1	11	GSPCALGLFCCCSSCFCLCCP
0.4	A0A220XIS2	tr|A0A220XIS2|A0A220XIS2_HEV Protein ORF3 OS=Hepatitis E virus OX=12461 PE=3 SV=1	11	GSPCALGLFCCCSSCFCLCCP
0.4	A0A060N2X2	tr|A0A060N2X2|A0A060N2X2_HEV Protein ORF3 OS=Hepatitis E virus OX=12461 PE=3 SV=1	12	SRPCALGLFCCCSSCFCLCCP
0.4	Q89803	tr|Q89803|Q89803_HEV Protein ORF3 OS=Hepatitis E virus OX=12461 PE=3 SV=1	12	PRPCALGLFCCCSSCFCLCCP
0.4	A0A1L2IVY2	tr|A0A1L2IVY2|A0A1L2IVY2_HEV Protein ORF3 OS=Hepatitis E virus OX=12461 GN=ORF3 PE=3 SV=1	2	GTSCALGLYCCCSSCFCLCCP
0.4	A0A3Q8QDH1	tr|A0A3Q8QDH1|A0A3Q8QDH1_HEV Protein ORF3 OS=Hepatitis E virus OX=12461 PE=3 SV=1	11	GSPCALGLFCCCSSCFCLCCP
0.4	A0A2P0W7C5	tr|A0A2P0W7C5|A0A2P0W7C5_HEV Protein ORF3 OS=Hepatitis E virus OX=12461 GN=ORF3 PE=3 SV=1	11	GSPCALGLFCCCSSCFCLCCP
0.4	A0A385L0I3	tr|A0A385L0I3|A0A385L0I3_HEV Protein ORF3 OS=Hepatitis E virus OX=12461 PE=3 SV=1	11	GSPCALGLFCCCSSCFCLCCP
0.4	K9MNW1	tr|K9MNW1|K9MNW1_HEV Protein ORF3 (Fragment) OS=Hepatitis E virus OX=12461 PE=3 SV=1	2	GSPCALGLFCCCSSCFCLCCP
0.4	H9BC72	tr|H9BC72|H9BC72_HEV Protein ORF3 (Fragment) OS=Hepatitis E virus OX=12461 PE=3 SV=1	6	GSTCALGLFCCCSSCFCLCCP
0.4	A0A481WBY2	tr|A0A481WBY2|A0A481WBY2_HEV Protein ORF3 (Fragment) OS=Hepatitis E virus OX=12461 PE=3 SV=1	2	GSPCALGLFCCCSSCFCLCCP
0.4	A0A2R4PMF8	tr|A0A2R4PMF8|A0A2R4PMF8_HEV Protein ORF3 (Fragment) OS=Hepatitis E virus OX=12461 PE=3 SV=1	11	GSPCALGLFCCCSSCFCLCCP
0.4	A0A024CCP1	tr|A0A024CCP1|A0A024CCP1_HEV Protein ORF3 (Fragment) OS=Hepatitis E virus OX=12461 PE=3 SV=1	3	SRPCALGLFCCCSSCFCLCCP
0.4	A0A411PYY4	tr|A0A411PYY4|A0A411PYY4_HEV Protein ORF3 OS=Hepatitis E virus OX=12461 PE=3 SV=1	11	GSPCALGLFCCCSSCFCLCCP
0.4	A6P6U7	tr|A6P6U7|A6P6U7_HEV Protein ORF3 OS=Hepatitis E virus OX=12461 PE=3 SV=1	11	GSPCALGLFCCCSSCFCLCCP
0.4	F8WRK1	tr|F8WRK1|F8WRK1_HEV Protein ORF3 OS=Hepatitis E virus OX=12461 PE=3 SV=1	11	GSPCALGLFCCCSSCFCLCCP
0.4	A0A411PYS9	tr|A0A411PYS9|A0A411PYS9_HEV Protein ORF3 OS=Hepatitis E virus OX=12461 PE=3 SV=1	11	GSPCALGLFCCCSSCFCLCCP
0.4	A0A481WBR9	tr|A0A481WBR9|A0A481WBR9_HEV Protein ORF3 (Fragment) OS=Hepatitis E virus OX=12461 PE=3 SV=1	2	GSPCALGLFCCCSSCFCLCCP
0.4	A0A411PZ36	tr|A0A411PZ36|A0A411PZ36_HEV Protein ORF3 OS=Hepatitis E virus OX=12461 PE=3 SV=1	12	SRPCALGLFCCCSSCFCLCCP
0.4	A0A481WC95	tr|A0A481WC95|A0A481WC95_HEV Protein ORF3 (Fragment) OS=Hepatitis E virus OX=12461 PE=3 SV=1	2	GSPCALGLFCCCSSCFCLCCP
0.4	B2NIN7	tr|B2NIN7|B2NIN7_HEV Protein ORF3 OS=Hepatitis E virus OX=12461 PE=3 SV=1	11	GSPCALGLFCCCSSCFCLCCP
0.4	B2NIP9	tr|B2NIP9|B2NIP9_HEV Protein ORF3 OS=Hepatitis E virus OX=12461 PE=3 SV=1	11	GSPCALGLFCCCSSCFCLCCP
0.4	H9BC90	tr|H9BC90|H9BC90_HEV Protein ORF3 (Fragment) OS=Hepatitis E virus OX=12461 PE=3 SV=1	6	GSPCALGLFCCCSSCFCLCCP
0.4	Q9WLK2	tr|Q9WLK2|Q9WLK2_HEV Protein ORF3 OS=Hepatitis E virus OX=12461 PE=3 SV=1	12	SRPCALGLFCCCSSCFCLCCP
0.4	Q0WYB1	tr|Q0WYB1|Q0WYB1_HEV Protein ORF3 OS=Hepatitis E virus OX=12461 PE=3 SV=1	11	GSPCALGLFCCCSSCFCLCCP
0.4	A0A411PYX0	tr|A0A411PYX0|A0A411PYX0_HEV Protein ORF3 OS=Hepatitis E virus OX=12461 PE=3 SV=1	11	GSPCALGLFCCCSSCFCLCCP
0.4	A0A024CEX4	tr|A0A024CEX4|A0A024CEX4_HEV Protein ORF3 (Fragment) OS=Hepatitis E virus OX=12461 PE=3 SV=1	3	SRPCALGLFCCCSSCFCLCCP
0.4	A0A024CCP7	tr|A0A024CCP7|A0A024CCP7_HEV Protein ORF3 (Fragment) OS=Hepatitis E virus OX=12461 PE=3 SV=1	3	SRPCALGLFCCCSSCFCLCCP
0.4	F1T001	tr|F1T001|F1T001_HEV Protein ORF3 OS=Hepatitis E virus OX=12461 PE=3 SV=1	11	GSPCALGLFCCCSSCFCLCCP
0.4	A0A1B1FIV2	tr|A0A1B1FIV2|A0A1B1FIV2_HEV Protein ORF3 OS=Hepatitis E virus OX=12461 PE=3 SV=1	11	GSPCALGLFCCCSSCFCLCCP
0.4	A0A411PZ00	tr|A0A411PZ00|A0A411PZ00_HEV Protein ORF3 OS=Hepatitis E virus OX=12461 PE=3 SV=1	11	GSPCALGLFCCCSSCFCLCCP
0.4	A0A024CD19	tr|A0A024CD19|A0A024CD19_HEV Protein ORF3 (Fragment) OS=Hepatitis E virus OX=12461 PE=3 SV=1	3	SRPCALGLFCCCSSCFCLCCP
0.4	H9BC80	tr|H9BC80|H9BC80_HEV Protein ORF3 (Fragment) OS=Hepatitis E virus OX=12461 PE=3 SV=1	6	GSPCALGLFCCCSSCFCLCCP
0.4	A0A2P9J512	tr|A0A2P9J512|A0A2P9J512_HEV Protein ORF3 OS=Hepatitis E virus OX=12461 PE=3 SV=1	11	GSPCALGLFCCCSSCFCLCCP
0.4	A0A481WC48	tr|A0A481WC48|A0A481WC48_HEV Protein ORF3 (Fragment) OS=Hepatitis E virus OX=12461 PE=3 SV=1	2	GSPCALGLFCCCSSCFCLCCP
0.4	C5I601	tr|C5I601|C5I601_HEV Protein ORF3 OS=Hepatitis E virus OX=12461 PE=3 SV=1	11	GSPCALGLFCCCSSCFCLCCP
0.4	H9BC82	tr|H9BC82|H9BC82_HEV Protein ORF3 (Fragment) OS=Hepatitis E virus OX=12461 PE=3 SV=1	6	GSPCALGLFCCCSSCFCLCCP
0.4	H9BC88	tr|H9BC88|H9BC88_HEV Protein ORF3 (Fragment) OS=Hepatitis E virus OX=12461 PE=3 SV=1	6	GSPCALGLFCCCSSCFCLCCP
0.4	A0A481WCB3	tr|A0A481WCB3|A0A481WCB3_HEV Protein ORF3 (Fragment) OS=Hepatitis E virus OX=12461 PE=3 SV=1	2	GSPCALGLFCCCSSCFCLCCP
0.4	K4F598	tr|K4F598|K4F598_HEV Protein ORF3 OS=Hepatitis E virus OX=12461 PE=3 SV=1	3	SRPCALGLFCCCSSCFCLCCP
0.4	A0A481WBN9	tr|A0A481WBN9|A0A481WBN9_HEV Protein ORF3 (Fragment) OS=Hepatitis E virus OX=12461 PE=3 SV=1	2	GSPCALGLFCCCSSCFCLCCP
0.4	A0A3G2WJH9	tr|A0A3G2WJH9|A0A3G2WJH9_HEV Protein ORF3 OS=Hepatitis E virus OX=12461 PE=3 SV=1	12	SSPCALGLFCCCSSCFCLCCP
0.4	A0A481WBQ2	tr|A0A481WBQ2|A0A481WBQ2_HEV Protein ORF3 (Fragment) OS=Hepatitis E virus OX=12461 PE=3 SV=1	2	GSPCALGLFCCCSSCFCLCCP
0.4	A0A0X9UNE6	tr|A0A0X9UNE6|A0A0X9UNE6_HEV Protein ORF3 OS=Hepatitis E virus OX=12461 PE=3 SV=1	11	GSPCALGLFCCCSSCFCLCCP
0.4	A0A024CD13	tr|A0A024CD13|A0A024CD13_HEV Protein ORF3 (Fragment) OS=Hepatitis E virus OX=12461 PE=3 SV=1	3	SRPCALGLFCCCSSCFCLCCP
0.4	A0A481WC52	tr|A0A481WC52|A0A481WC52_HEV Protein ORF3 (Fragment) OS=Hepatitis E virus OX=12461 PE=3 SV=1	2	GSPCALGLFCCCSSCFCLCCP
0.4	A0A3G9ENJ0	tr|A0A3G9ENJ0|A0A3G9ENJ0_HEV Protein ORF3 OS=Hepatitis E virus OX=12461 PE=3 SV=1	11	GSPCALGLFCCCSSCFCLCCP
0.4	S4VNC7	tr|S4VNC7|S4VNC7_HEV Protein ORF3 (Fragment) OS=Hepatitis E virus OX=12461 PE=3 SV=1	11	GSPCALGLFCCCSSCFCLCCP
0.4	B8Q8Z7	tr|B8Q8Z7|B8Q8Z7_HEV Protein ORF3 OS=Hepatitis E virus OX=12461 PE=3 SV=1	11	GSPCALGLFCCCSSCFCLCCP
0.4	A0A481WC61	tr|A0A481WC61|A0A481WC61_HEV Protein ORF3 (Fragment) OS=Hepatitis E virus OX=12461 PE=3 SV=1	2	GSPCALGLFCCCSSCFCLCCP
0.4	A0A481WBZ9	tr|A0A481WBZ9|A0A481WBZ9_HEV Protein ORF3 (Fragment) OS=Hepatitis E virus OX=12461 PE=3 SV=1	2	GSPCALGLFCCCSSCFCLCCP
0.4	A0A481WC29	tr|A0A481WC29|A0A481WC29_HEV Protein ORF3 (Fragment) OS=Hepatitis E virus OX=12461 PE=3 SV=1	2	GSPCALGLFCCCSSCFCLCCP
0.4	A0A4P6DB37	tr|A0A4P6DB37|A0A4P6DB37_HEV Protein ORF3 OS=Hepatitis E virus OX=12461 PE=3 SV=1	12	SRPCALGLFCCCSSCFCLCCP
0.4	A0A2R4PME4	tr|A0A2R4PME4|A0A2R4PME4_HEV Protein ORF3 (Fragment) OS=Hepatitis E virus OX=12461 PE=3 SV=1	11	GSPCALGLFCCCSSCFCLCCP
0.4	A0A481WBL3	tr|A0A481WBL3|A0A481WBL3_HEV Protein ORF3 (Fragment) OS=Hepatitis E virus OX=12461 PE=3 SV=1	2	GSPCALGLFCCCSSCFCLCCP
0.4	A0A481WBN6	tr|A0A481WBN6|A0A481WBN6_HEV Protein ORF3 (Fragment) OS=Hepatitis E virus OX=12461 PE=3 SV=1	2	GSPCALGLFCCCSSCFCLCCP
0.4	A0A481WBD7	tr|A0A481WBD7|A0A481WBD7_HEV Protein ORF3 (Fragment) OS=Hepatitis E virus OX=12461 PE=3 SV=1	2	GSPCALGLFCCCSSCFCLCCP
0.4	A0A481WC31	tr|A0A481WC31|A0A481WC31_HEV Protein ORF3 (Fragment) OS=Hepatitis E virus OX=12461 PE=3 SV=1	2	GSPCALGLFCCCSSCFCLCCP
0.4	A0A2P0N9W0	tr|A0A2P0N9W0|A0A2P0N9W0_HEV Protein ORF3 OS=Hepatitis E virus OX=12461 PE=3 SV=1	11	GSSCALGLFCCCSSCFCLCCP
0.4	A0A481WBR8	tr|A0A481WBR8|A0A481WBR8_HEV Protein ORF3 (Fragment) OS=Hepatitis E virus OX=12461 PE=3 SV=1	2	GSPCALGLFCCCSSCFCLCCP
0.4	Q2Z1X0	tr|Q2Z1X0|Q2Z1X0_HEV Protein ORF3 OS=Hepatitis E virus OX=12461 PE=3 SV=1	11	GSPCALGLFCCCSSCFCLCCP
0.4	A0A481WBP3	tr|A0A481WBP3|A0A481WBP3_HEV Protein ORF3 (Fragment) OS=Hepatitis E virus OX=12461 PE=3 SV=1	2	GSPCALGLFCCCSSCFCLCCP
0.4	A0A481WC33	tr|A0A481WC33|A0A481WC33_HEV Protein ORF3 (Fragment) OS=Hepatitis E virus OX=12461 PE=3 SV=1	2	GSPCALGLFCCCSSCFCLCCP
0.4	A0A481WC73	tr|A0A481WC73|A0A481WC73_HEV Protein ORF3 (Fragment) OS=Hepatitis E virus OX=12461 PE=3 SV=1	2	GSPCALGLFCCCSSCFCLCCP
0.4	A0A411PYT5	tr|A0A411PYT5|A0A411PYT5_HEV Protein ORF3 OS=Hepatitis E virus OX=12461 PE=3 SV=1	11	GSPCALGLFCCCSSCFCLCCP
0.4	A0A481WCA9	tr|A0A481WCA9|A0A481WCA9_HEV Protein ORF3 (Fragment) OS=Hepatitis E virus OX=12461 PE=3 SV=1	2	GSPCALGLFCCCSSCFCLCCP
0.4	K4F5X1	tr|K4F5X1|K4F5X1_HEV Protein ORF3 OS=Hepatitis E virus OX=12461 PE=3 SV=1	3	SRPCALGLFCCCSSCFCLCCP
0.4	A0A481WC19	tr|A0A481WC19|A0A481WC19_HEV Protein ORF3 (Fragment) OS=Hepatitis E virus OX=12461 PE=3 SV=1	2	GSPCALGLFCCCSSCFCLCCP
0.4	A0A024CD26	tr|A0A024CD26|A0A024CD26_HEV Protein ORF3 (Fragment) OS=Hepatitis E virus OX=12461 PE=3 SV=1	3	SRPCALGLFCCCSSCFCLCCP
0.4	A0A4P6DAS7	tr|A0A4P6DAS7|A0A4P6DAS7_HEV Protein ORF3 OS=Hepatitis E virus OX=12461 PE=3 SV=1	12	SRPCALGLFCCCSSCFCLCCP
0.4	A0A024CEY1	tr|A0A024CEY1|A0A024CEY1_HEV Protein ORF3 (Fragment) OS=Hepatitis E virus OX=12461 PE=3 SV=1	3	SRPCALGLFCCCSSCFCLCCP
0.4	A0A481WC64	tr|A0A481WC64|A0A481WC64_HEV Protein ORF3 (Fragment) OS=Hepatitis E virus OX=12461 PE=3 SV=1	2	GSPCALGLFCCCSSCFCLCCP
0.4	A0A3S8NTY6	tr|A0A3S8NTY6|A0A3S8NTY6_HEV Protein ORF3 OS=Hepatitis E virus OX=12461 PE=3 SV=1	11	GSPCALGLFCCCSSCFCLCCP
0.4	A0A481WC28	tr|A0A481WC28|A0A481WC28_HEV Protein ORF3 (Fragment) OS=Hepatitis E virus OX=12461 PE=3 SV=1	2	GSPCALGLFCCCSSCFCLCCP
0.4	A0A481WCA1	tr|A0A481WCA1|A0A481WCA1_HEV Protein ORF3 (Fragment) OS=Hepatitis E virus OX=12461 PE=3 SV=1	2	GSPCALGLFCCCSSCFCLCCP
0.4	Q69412	tr|Q69412|Q69412_HEV Protein ORF3 OS=Hepatitis E virus OX=12461 GN=ORF3 PE=3 SV=1	12	SRPCALGLFCCCSSCFCLCCP
0.4	J9SPK1	tr|J9SPK1|J9SPK1_HEV Protein ORF3 OS=Hepatitis E virus OX=12461 PE=3 SV=1	11	GSPCALGLFCCCSSCFCLCCP
0.4	K9MPR8	tr|K9MPR8|K9MPR8_HEV Protein ORF3 (Fragment) OS=Hepatitis E virus OX=12461 PE=3 SV=1	2	GSPCALGLFCCCSSCFCLCCP
0.4	A0A481WD09	tr|A0A481WD09|A0A481WD09_HEV Protein ORF3 (Fragment) OS=Hepatitis E virus OX=12461 PE=3 SV=1	2	GSPCALGLFCCCSSCFCLCCP
0.4	Q2MH11	tr|Q2MH11|Q2MH11_HEV Protein ORF3 OS=Hepatitis E virus OX=12461 PE=3 SV=1	11	GSPCALGLFCCCSSCFCLCCP
0.4	K9MQ76	tr|K9MQ76|K9MQ76_HEV Protein ORF3 (Fragment) OS=Hepatitis E virus OX=12461 PE=3 SV=1	2	GSPCALGLFCCCSSCFCLCCP
0.4	O71146	tr|O71146|O71146_HEV Protein ORF3 OS=Hepatitis E virus OX=12461 GN=ORF3 PE=3 SV=1	11	GSPCALGLFCCCSSCFCLCCP
0.4	A0A1B1H4F3	tr|A0A1B1H4F3|A0A1B1H4F3_HEV Protein ORF3 OS=Hepatitis E virus OX=12461 PE=3 SV=1	11	GSSCALGLFCCCSSCFCLCCP
0.4	A0A481WBP6	tr|A0A481WBP6|A0A481WBP6_HEV Protein ORF3 (Fragment) OS=Hepatitis E virus OX=12461 PE=3 SV=1	2	GSPCALGLFCCCSSCFCLCCP
0.4	A0A481WBW4	tr|A0A481WBW4|A0A481WBW4_HEV Protein ORF3 (Fragment) OS=Hepatitis E virus OX=12461 PE=3 SV=1	2	GSPCALGLFCCCSSCFCLCCP
0.4	A0A109P4W2	tr|A0A109P4W2|A0A109P4W2_HEV Protein ORF3 (Fragment) OS=Hepatitis E virus OX=12461 GN=ORF3 PE=3 SV=1	1	CALGLFCCCSSCFCLCCPRHR
0.4	H9BC74	tr|H9BC74|H9BC74_HEV Protein ORF3 (Fragment) OS=Hepatitis E virus OX=12461 PE=3 SV=1	6	GSPCALGLFCCCSSCFCLCCP
0.4	A0A411PYU2	tr|A0A411PYU2|A0A411PYU2_HEV Protein ORF3 OS=Hepatitis E virus OX=12461 PE=3 SV=1	11	GSPCALGLFCCCSSCFCLCCP
0.4	Q0WYB4	tr|Q0WYB4|Q0WYB4_HEV Protein ORF3 OS=Hepatitis E virus OX=12461 PE=3 SV=1	11	GSPCALGLFCCCSSCFCLCCP
0.4	K9MPL2	tr|K9MPL2|K9MPL2_HEV Protein ORF3 (Fragment) OS=Hepatitis E virus OX=12461 PE=3 SV=1	2	GPPCALGLFCCCSSCFCLCCP
0.4	A6P6V0	tr|A6P6V0|A6P6V0_HEV Protein ORF3 OS=Hepatitis E virus OX=12461 PE=3 SV=1	11	GSSCALGLFCCCSSCFCLCCP
0.4	K9MPJ8	tr|K9MPJ8|K9MPJ8_HEV Protein ORF3 (Fragment) OS=Hepatitis E virus OX=12461 PE=3 SV=1	2	GSPCALGLFCCCSSCFCLCCP
0.4	A0A481WBR1	tr|A0A481WBR1|A0A481WBR1_HEV Protein ORF3 (Fragment) OS=Hepatitis E virus OX=12461 PE=3 SV=1	2	GSPCALGLFCCCSSCFCLCCP
0.4	A0A3S8NTY9	tr|A0A3S8NTY9|A0A3S8NTY9_HEV Protein ORF3 OS=Hepatitis E virus OX=12461 PE=3 SV=1	11	GSPCALGLFCCCSSCFCLCCP
0.4	K9MPY7	tr|K9MPY7|K9MPY7_HEV Protein ORF3 (Fragment) OS=Hepatitis E virus OX=12461 PE=3 SV=1	2	GSPCALGLFCCCSSCFCLCCP
0.4	J9T1R4	tr|J9T1R4|J9T1R4_HEV Protein ORF3 OS=Hepatitis E virus OX=12461 PE=3 SV=1	11	GSPCALGLFCCCSSCFCLCCP
0.4	A0A2S1B6W5	tr|A0A2S1B6W5|A0A2S1B6W5_HEV Protein ORF3 OS=Hepatitis E virus OX=12461 PE=3 SV=1	12	SRPCALGLFCCCSSCFCLCCP
0.4	K9MPL7	tr|K9MPL7|K9MPL7_HEV Protein ORF3 (Fragment) OS=Hepatitis E virus OX=12461 PE=3 SV=1	2	GSPCALGLFCCCSSCFCLCCP
0.4	A0A125R926	tr|A0A125R926|A0A125R926_HEV Protein ORF3 OS=Hepatitis E virus OX=12461 PE=3 SV=1	11	GSPCALGLFCCCSSCFCLCCP
0.4	A0A1L3HJ35	tr|A0A1L3HJ35|A0A1L3HJ35_HEV Protein ORF3 OS=Hepatitis E virus OX=12461 PE=3 SV=1	12	SPPCALGLFCCCSSCFCLCCP
0.4	Q2Z1W7	tr|Q2Z1W7|Q2Z1W7_HEV Protein ORF3 OS=Hepatitis E virus OX=12461 PE=3 SV=1	11	GSPCALGLFCCCSSCFCLCCP
0.4	A0A481WBD6	tr|A0A481WBD6|A0A481WBD6_HEV Protein ORF3 (Fragment) OS=Hepatitis E virus OX=12461 PE=3 SV=1	2	GSPCALGLFCCCSSCFCLCCP
0.4	A0A451G3T8	tr|A0A451G3T8|A0A451G3T8_HEV Protein ORF3 OS=Hepatitis E virus OX=12461 PE=3 SV=1	2	GTSCALGLYCCCSSCFCLCCP
0.4	A0A481WBQ8	tr|A0A481WBQ8|A0A481WBQ8_HEV Protein ORF3 (Fragment) OS=Hepatitis E virus OX=12461 PE=3 SV=1	2	GSPCALGLFCCCSSCFCLCCP
0.4	B8QFR5	tr|B8QFR5|B8QFR5_HEV Protein ORF3 OS=Hepatitis E virus OX=12461 PE=3 SV=1	11	GSPCALGLFCCCSSCFCLCCP
0.4	K9MPK5	tr|K9MPK5|K9MPK5_HEV Protein ORF3 (Fragment) OS=Hepatitis E virus OX=12461 PE=3 SV=1	2	GSPCALGLFCCCSSCFCLCCP
0.4	A0A1B1H4F0	tr|A0A1B1H4F0|A0A1B1H4F0_HEV Protein ORF3 OS=Hepatitis E virus OX=12461 PE=3 SV=1	11	GSSCALGLFCCCSSCFCLCCP
0.4	V9SFY4	tr|V9SFY4|V9SFY4_HEV Protein ORF3 OS=Hepatitis E virus OX=12461 PE=3 SV=1	11	GSPCALGLFCCCSSCFCLCCP
0.4	A0A024CEW8	tr|A0A024CEW8|A0A024CEW8_HEV Protein ORF3 (Fragment) OS=Hepatitis E virus OX=12461 PE=3 SV=1	3	SRPCALGLFCCCSSCFCLCCP
0.4	Q80IR8	tr|Q80IR8|Q80IR8_HEV Protein ORF3 OS=Hepatitis E virus OX=12461 PE=3 SV=1	8	GSPCALGLFCCCSSCFCLCCP
0.4	A0A0X9G464	tr|A0A0X9G464|A0A0X9G464_HEV Protein ORF3 (Fragment) OS=Hepatitis E virus OX=12461 GN=ORF3 PE=3 SV=1	1	CALGLFCCCSSCFCLCCPRHR
0.4	B7X6K6	tr|B7X6K6|B7X6K6_HEV Protein ORF3 OS=Hepatitis E virus OX=12461 PE=3 SV=1	11	GSPCALGLFCCCSSCFCLCCP
0.4	A0A650GCL3	tr|A0A650GCL3|A0A650GCL3_HEV Protein ORF3 (Fragment) OS=Hepatitis E virus OX=12461 PE=3 SV=1	11	GSPCALGLFCCCSSCFCLCCP
0.4	C4B4U2	tr|C4B4U2|C4B4U2_HEV Protein ORF3 OS=Hepatitis E virus OX=12461 PE=3 SV=1	11	GSPCALGLFCCCSSCFCLCCP
0.4	A0A411PYU5	tr|A0A411PYU5|A0A411PYU5_HEV Protein ORF3 OS=Hepatitis E virus OX=12461 PE=3 SV=1	11	GSPCALGLFCCCSSCFCLCCP
0.4	A0A481WBW9	tr|A0A481WBW9|A0A481WBW9_HEV Protein ORF3 (Fragment) OS=Hepatitis E virus OX=12461 PE=3 SV=1	2	GSPCALGLFCCCSSCFCLCCP
0.4	A0A2R2XDU9	tr|A0A2R2XDU9|A0A2R2XDU9_HEV Protein ORF3 OS=Hepatitis E virus OX=12461 PE=3 SV=1	11	GSPCALGLFCCCSSCFCLCCP
0.4	A0A481WCF2	tr|A0A481WCF2|A0A481WCF2_HEV Protein ORF3 (Fragment) OS=Hepatitis E virus OX=12461 PE=3 SV=1	2	GSPCALGLFCCCSSCFCLCCP
0.4	S4VNC3	tr|S4VNC3|S4VNC3_HEV Protein ORF3 (Fragment) OS=Hepatitis E virus OX=12461 PE=3 SV=1	7	GSPCALGLFCCCSSCFCLCCP
0.4	K4F913	tr|K4F913|K4F913_HEV Protein ORF3 OS=Hepatitis E virus OX=12461 PE=3 SV=1	3	SRPCALGLFCCCSSCFCLCCP
0.4	B7X6K0	tr|B7X6K0|B7X6K0_HEV Protein ORF3 OS=Hepatitis E virus OX=12461 PE=3 SV=1	11	GSPCALGLFCCCSSCFCLCCP
0.4	A0A481WBE7	tr|A0A481WBE7|A0A481WBE7_HEV Protein ORF3 (Fragment) OS=Hepatitis E virus OX=12461 PE=3 SV=1	2	GSSCALGLFCCCSSCFCLCCP
0.4	A0A0X9FVI5	tr|A0A0X9FVI5|A0A0X9FVI5_HEV Protein ORF3 (Fragment) OS=Hepatitis E virus OX=12461 GN=ORF3 PE=3 SV=1	1	CALGLFCCCSSCFCLCCPRHR
0.4	A0A481WBJ9	tr|A0A481WBJ9|A0A481WBJ9_HEV Protein ORF3 (Fragment) OS=Hepatitis E virus OX=12461 PE=3 SV=1	2	GSPCALGLFCCCSSCFCLCCP
0.4	A0A068FV11	tr|A0A068FV11|A0A068FV11_HEV Protein ORF3 OS=Hepatitis E virus OX=12461 PE=3 SV=1	11	GSPCALGLFCCCSSCFCLCCP
0.4	Q1XH07	tr|Q1XH07|Q1XH07_HEV Protein ORF3 OS=Hepatitis E virus OX=12461 PE=3 SV=1	11	GSPCALGLFCCCSSCFCLCCP
0.4	B4Y5K9	tr|B4Y5K9|B4Y5K9_HEV Protein ORF3 OS=Hepatitis E virus OX=12461 PE=3 SV=1	11	GSPCAIGLFCCCSSCFCLCCP
0.4	A0A481WC51	tr|A0A481WC51|A0A481WC51_HEV Protein ORF3 (Fragment) OS=Hepatitis E virus OX=12461 PE=3 SV=1	2	GSPCALGLFCCCSSCFCLCCP
0.4	A0A4P6DAZ4	tr|A0A4P6DAZ4|A0A4P6DAZ4_HEV Protein ORF3 OS=Hepatitis E virus OX=12461 PE=3 SV=1	12	SRPCALGLFCCCSSCFCLCCP
0.4	A0A411PZ04	tr|A0A411PZ04|A0A411PZ04_HEV Protein ORF3 OS=Hepatitis E virus OX=12461 PE=3 SV=1	12	SRPCALGLFCCCSSCFCLCCP
0.4	A0A481WBT6	tr|A0A481WBT6|A0A481WBT6_HEV Protein ORF3 (Fragment) OS=Hepatitis E virus OX=12461 PE=3 SV=1	2	GSPCALGLFCCCSSCFCLCCP
0.4	A0A2R4PMG1	tr|A0A2R4PMG1|A0A2R4PMG1_HEV Protein ORF3 (Fragment) OS=Hepatitis E virus OX=12461 PE=3 SV=1	11	GSPCALGLFCCCSSCFCLCCP
0.4	A0A481WBM2	tr|A0A481WBM2|A0A481WBM2_HEV Protein ORF3 (Fragment) OS=Hepatitis E virus OX=12461 PE=3 SV=1	2	GSPCALGLFCCCSSCFCLCCP
0.4	Q9YWQ8	tr|Q9YWQ8|Q9YWQ8_HEV Protein ORF3 OS=Hepatitis E virus OX=12461 PE=3 SV=1	12	SRSCALGLFCCCSSCFCLCCP
0.4	Q5L4M2	tr|Q5L4M2|Q5L4M2_HEV Protein ORF3 OS=Hepatitis E virus OX=12461 PE=3 SV=1	11	GSPCALGLFCCCSSCFCLCCP
0.4	A0A481WBU1	tr|A0A481WBU1|A0A481WBU1_HEV Protein ORF3 (Fragment) OS=Hepatitis E virus OX=12461 PE=3 SV=1	2	GSPCALGLFCCCSSCFCLCCP
0.4	A0A481WBJ8	tr|A0A481WBJ8|A0A481WBJ8_HEV Protein ORF3 (Fragment) OS=Hepatitis E virus OX=12461 PE=3 SV=1	2	GSPCALGLFCCCSSCFCLCCP
0.4	Q8JT33	tr|Q8JT33|Q8JT33_HEV Protein ORF3 OS=Hepatitis E virus OX=12461 PE=3 SV=1	12	SRPCALGLFCCCSSCFCLCCP
0.4	A0A481WBU8	tr|A0A481WBU8|A0A481WBU8_HEV Protein ORF3 (Fragment) OS=Hepatitis E virus OX=12461 PE=3 SV=1	2	GSPCALGLFCCCSSCFCLCCP
0.4	Q8JJM9	tr|Q8JJM9|Q8JJM9_HEV Protein ORF3 OS=Hepatitis E virus OX=12461 PE=3 SV=1	11	GSPCALGLFCCCSSCFCLCCP
0.4	A0A411PYW6	tr|A0A411PYW6|A0A411PYW6_HEV Protein ORF3 OS=Hepatitis E virus OX=12461 PE=3 SV=1	11	GSPCALGLFCCCSSCFCLCCP
0.4	A0A4P6D879	tr|A0A4P6D879|A0A4P6D879_HEV Protein ORF3 OS=Hepatitis E virus OX=12461 PE=3 SV=1	9	SRPCALGLFCCCSSCFCLCCP
0.4	A0A565D553	tr|A0A565D553|A0A565D553_HEV Protein ORF3 OS=Hepatitis E virus OX=12461 PE=3 SV=1	11	GSPCALGLFCCCSSCFCLCCP
0.4	A0A481WC85	tr|A0A481WC85|A0A481WC85_HEV Protein ORF3 (Fragment) OS=Hepatitis E virus OX=12461 PE=3 SV=1	2	GSPCALGLFCCCSSCFCLCCP
0.4	A0A481WBN0	tr|A0A481WBN0|A0A481WBN0_HEV Protein ORF3 (Fragment) OS=Hepatitis E virus OX=12461 PE=3 SV=1	2	GSPCALGLFCCCSSCFCLCCP
0.4	A0A411PZ66	tr|A0A411PZ66|A0A411PZ66_HEV Protein ORF3 OS=Hepatitis E virus OX=12461 PE=3 SV=1	12	SRPCALGLFCCCSSCFCLCCP
0.4	A0A481WBW0	tr|A0A481WBW0|A0A481WBW0_HEV Protein ORF3 (Fragment) OS=Hepatitis E virus OX=12461 PE=3 SV=1	2	GSPCALGLFCCCSSCFCLCCP
0.4	A0A565D556	tr|A0A565D556|A0A565D556_HEV Protein ORF3 OS=Hepatitis E virus OX=12461 PE=3 SV=1	11	GSPCALGLFCCCSSCFCLCCP
0.4	C6G906	tr|C6G906|C6G906_HEV Protein ORF3 OS=Hepatitis E virus OX=12461 PE=3 SV=1	11	GSPCALGLFCCCSSCFCLCCP
0.4	A0A024CCQ8	tr|A0A024CCQ8|A0A024CCQ8_HEV Protein ORF3 (Fragment) OS=Hepatitis E virus OX=12461 PE=3 SV=1	3	SRPCALGLFCCCSSCFCLCCP
0.4	A0A481WC69	tr|A0A481WC69|A0A481WC69_HEV Protein ORF3 (Fragment) OS=Hepatitis E virus OX=12461 PE=3 SV=1	2	GSPCALGLFCCCSSCFCLCCP
0.4	A0A4P9Q2D1	tr|A0A4P9Q2D1|A0A4P9Q2D1_HEV Protein ORF3 OS=Hepatitis E virus OX=12461 PE=3 SV=1	11	GSPCALGLFCCCSSCFCLCCP
0.4	A0A024CDS4	tr|A0A024CDS4|A0A024CDS4_HEV Protein ORF3 (Fragment) OS=Hepatitis E virus OX=12461 PE=3 SV=1	3	SRPCALGLFCCCSSCFCLCCP
0.4	S4VK06	tr|S4VK06|S4VK06_HEV Protein ORF3 OS=Hepatitis E virus OX=12461 PE=3 SV=1	11	GSPCALGLFCCCSSCFCLCCP
0.4	A0A411PYS2	tr|A0A411PYS2|A0A411PYS2_HEV Protein ORF3 OS=Hepatitis E virus OX=12461 PE=3 SV=1	11	GSPCALGLFCCCSSCFCLCCP
0.4	A0A481WBR7	tr|A0A481WBR7|A0A481WBR7_HEV Protein ORF3 (Fragment) OS=Hepatitis E virus OX=12461 PE=3 SV=1	2	GPPCALGLFCCCSSCFCLCCP
0.4	A0A411PYV9	tr|A0A411PYV9|A0A411PYV9_HEV Protein ORF3 OS=Hepatitis E virus OX=12461 PE=3 SV=1	11	GSPCALGLFCCCSSCFCLCCP
0.4	A0A481WBS6	tr|A0A481WBS6|A0A481WBS6_HEV Protein ORF3 (Fragment) OS=Hepatitis E virus OX=12461 PE=3 SV=1	2	GSPCALGLFCCCSSCFCLCCP
0.4	A0A481WBB0	tr|A0A481WBB0|A0A481WBB0_HEV Protein ORF3 (Fragment) OS=Hepatitis E virus OX=12461 PE=3 SV=1	2	GSPCALGLFCCCSSCFCLCCP
0.4	A0A2I7M8D5	tr|A0A2I7M8D5|A0A2I7M8D5_HEV Protein ORF3 OS=Hepatitis E virus OX=12461 PE=3 SV=1	11	GSPCALGLFCCCSSCFCLCCP
0.4	A0A481WC43	tr|A0A481WC43|A0A481WC43_HEV Protein ORF3 (Fragment) OS=Hepatitis E virus OX=12461 PE=3 SV=1	2	GSPCALGLFCCCSSCFCLCCP
0.4	A0A125R932	tr|A0A125R932|A0A125R932_HEV Protein ORF3 OS=Hepatitis E virus OX=12461 PE=3 SV=1	11	GSPCALGLFCCCSSCFCLCCP
0.4	K9MQ79	tr|K9MQ79|K9MQ79_HEV Protein ORF3 (Fragment) OS=Hepatitis E virus OX=12461 PE=3 SV=1	2	GSPCALGLFCCCSSCFCLCCP
0.4	A0A411PYR5	tr|A0A411PYR5|A0A411PYR5_HEV Protein ORF3 OS=Hepatitis E virus OX=12461 PE=3 SV=1	11	GSPCALGLFCCCSSCFCLCCP
0.4	Q80IY4	tr|Q80IY4|Q80IY4_HEV Protein ORF3 OS=Hepatitis E virus OX=12461 PE=3 SV=1	11	GSPCALGLFCCCSSCFCLCCP
0.4	Q2Z1X3	tr|Q2Z1X3|Q2Z1X3_HEV Protein ORF3 OS=Hepatitis E virus OX=12461 PE=3 SV=1	11	GSPCALGLFCCCSSCFCLCCP
0.4	K9MPX5	tr|K9MPX5|K9MPX5_HEV Protein ORF3 (Fragment) OS=Hepatitis E virus OX=12461 PE=3 SV=1	2	GPPCALGLFCCCSSCFCLCCP
0.4	A0A411PZ20	tr|A0A411PZ20|A0A411PZ20_HEV Protein ORF3 OS=Hepatitis E virus OX=12461 PE=3 SV=1	11	GSPCALGLFCCCSSCFCLCCP
0.4	A0A1L2IVY3	tr|A0A1L2IVY3|A0A1L2IVY3_HEV Protein ORF3 OS=Hepatitis E virus OX=12461 GN=ORF3 PE=3 SV=1	2	GTSCALGLYCCCSSCFCLCCP
0.4	A0A3G9F1F8	tr|A0A3G9F1F8|A0A3G9F1F8_HEV Protein ORF3 OS=Hepatitis E virus OX=12461 PE=3 SV=1	11	GSPCALGLFCCCSSCFCLCCP
0.4	A0A481WC44	tr|A0A481WC44|A0A481WC44_HEV Protein ORF3 (Fragment) OS=Hepatitis E virus OX=12461 PE=3 SV=1	2	GSPCALGLFCCCSSCFCLCCP
0.4	A0A481WBZ4	tr|A0A481WBZ4|A0A481WBZ4_HEV Protein ORF3 (Fragment) OS=Hepatitis E virus OX=12461 PE=3 SV=1	2	GSPCALGLFCCCSSCFCLCCP
0.4	H9BC84	tr|H9BC84|H9BC84_HEV Protein ORF3 (Fragment) OS=Hepatitis E virus OX=12461 PE=3 SV=1	6	GSPCALGLFCCCSSCFCLCCP
0.4	V9SHC7	tr|V9SHC7|V9SHC7_HEV Protein ORF3 OS=Hepatitis E virus OX=12461 PE=3 SV=1	11	GPPCALGLFCCCSSCFCLCCP
0.4	A0A6H2LBN6	tr|A0A6H2LBN6|A0A6H2LBN6_SARS2 Surface glycoprotein OS=Severe acute respiratory syndrome coronavirus 2 OX=2697049 GN=S PE=4 SV=1	1236	CMTSCCSCLKGCFSCGSCCKF
0.4	A0A6H1PKW7	tr|A0A6H1PKW7|A0A6H1PKW7_SARS2 Surface glycoprotein OS=Severe acute respiratory syndrome coronavirus 2 OX=2697049 GN=S PE=4 SV=1	1236	CMTSCCSCLKGCCSYGSCCKF
0.4	A0A384QZE9	tr|A0A384QZE9|A0A384QZE9_CVHNL Spike glycoprotein OS=Human coronavirus NL63 OX=277944 GN=S PE=3 SV=1	1321	TGCCGCCNCLTSSMRGCCDCG
0.4	Q0ZME7	sp|Q0ZME7|SPIKE_CVHN5 Spike glycoprotein OS=Human coronavirus HKU1 (isolate N5) OX=443241 GN=S PE=1 SV=1	1316	ICCCTGCGSACFSKCHNCCDE
0.35	A0A6H1XM27	tr|A0A6H1XM27|A0A6H1XM27_SARS2 Surface glycoprotein OS=Severe acute respiratory syndrome coronavirus 2 OX=2697049 GN=S PE=4 SV=1	1236	CMTSCCSCLKGCCSCGSGGGG
0.35	K9N5Q8	sp|K9N5Q8|SPIKE_MERS1 Spike glycoprotein OS=Middle East respiratory syndrome-related coronavirus (isolate United Kingdom/H123990006/2012) OX=1263720 GN=S PE=1 SV=1	1318	LCCTGCGTNCMGKLKCNRCCD
0.35	O90299	sp|O90299|ORF3_HEVHY Protein ORF3 OS=Hepatitis E virus genotype 1 (isolate Human/India/Hyderabad) OX=512346 GN=ORF3 PE=1 SV=2	3	SRPWALGLFCCCSSCFCLCCS
0.35	I2E675	tr|I2E675|I2E675_HEV Protein ORF3 OS=Hepatitis E virus OX=12461 PE=3 SV=1	3	MPPCALGLFCFCSSCFCLCCP
0.35	A0A2I6RJY6	tr|A0A2I6RJY6|A0A2I6RJY6_HEV Protein ORF3 OS=Hepatitis E virus OX=12461 PE=3 SV=1	3	MPPCALGLFCFCSSCFCLCCP
0.35	M1VLN0	tr|M1VLN0|M1VLN0_HEV Protein ORF3 (Fragment) OS=Hepatitis E virus OX=12461 GN=ORF3 PE=3 SV=1	3	MPPCALGLFCFCSSCFCLCCP
0.35	Q2IAY4	tr|Q2IAY4|Q2IAY4_HEV Protein ORF3 OS=Hepatitis E virus OX=12461 PE=2 SV=1	3	MPPCALGLFCFCSSCFCLCCP
0.35	E2I6L3	tr|E2I6L3|E2I6L3_HEV Protein ORF3 OS=Hepatitis E virus OX=12461 PE=3 SV=1	3	MPPCALGPFCFCSSCFCLCCP
0.35	A0A2R4PME9	tr|A0A2R4PME9|A0A2R4PME9_HEV Protein ORF3 (Fragment) OS=Hepatitis E virus OX=12461 PE=3 SV=1	11	GSPCALGLFCGCSSCFCLCCP
0.35	B0FYW5	tr|B0FYW5|B0FYW5_HEV Protein ORF3 OS=Hepatitis E virus OX=12461 PE=3 SV=1	3	MPPCALGLFCFCSSCFCLCCP
0.35	Q2IAY3	tr|Q2IAY3|Q2IAY3_HEV Protein ORF3 OS=Hepatitis E virus OX=12461 PE=2 SV=1	3	MPPCALGLFCFCSSCFCLCCP
0.35	Q4LES2	tr|Q4LES2|Q4LES2_HEV Protein ORF3 OS=Hepatitis E virus OX=12461 PE=3 SV=1	3	MPPCALGLFCFCSSCFCLCCP
0.35	Q2IB31	tr|Q2IB31|Q2IB31_HEV Protein ORF3 OS=Hepatitis E virus OX=12461 PE=2 SV=1	3	MPSCALGLFCFCSSCFCLCCP
0.35	A1DZD3	tr|A1DZD3|A1DZD3_HEV Protein ORF3 OS=Hepatitis E virus OX=12461 PE=3 SV=1	3	MPPCALGLFCFCSSCFCLCCP
0.35	A0A0N9RT40	tr|A0A0N9RT40|A0A0N9RT40_HEV Protein ORF3 OS=Hepatitis E virus OX=12461 GN=ORF3 PE=3 SV=1	11	GSSCALGLFCYCSSCFCLCCP
0.35	A8S1J5	tr|A8S1J5|A8S1J5_HEV Protein ORF3 OS=Hepatitis E virus OX=12461 PE=3 SV=1	12	MPPCALGLFCFCSSCSCLCCP
0.35	S6A6Q5	tr|S6A6Q5|S6A6Q5_HEV Protein ORF3 OS=Hepatitis E virus OX=12461 PE=3 SV=1	3	MPPCALGLFCFCSSCFCLCCP
0.35	A0A3Q8AKM0	tr|A0A3Q8AKM0|A0A3Q8AKM0_SARS S protein OS=Severe acute respiratory syndrome coronavirus OX=694009 GN=S PE=4 SV=1	1222	MTNCCSCFKGMCSCGSCCKFD
0.35	T2A5H1	tr|T2A5H1|T2A5H1_HPV59 Probable protein E5 OS=Human papillomavirus type 59 OX=37115 GN=E5 PE=3 SV=1	1	MITLVFVCCVCVCLCVCCNVP
0.35	A0A2L2QDH0	tr|A0A2L2QDH0|A0A2L2QDH0_HHV6H Uncharacterized protein OS=Human herpesvirus 6B OX=32604 PE=4 SV=1	10	MCVFFCVCVFFCVCIFLCVCI
0.35	A0A2L2QC05	tr|A0A2L2QC05|A0A2L2QC05_HHV6H Uncharacterized protein OS=Human herpesvirus 6B OX=32604 PE=4 SV=1	32	VCVFFCVCVFFCVCVFFCVCI
0.35	T2A663	tr|T2A663|T2A663_HPV59 Probable protein E5 OS=Human papillomavirus type 59 OX=37115 GN=E5 PE=3 SV=1	1	MITLVFVCCVCVCLCVCCNVP
0.35	Q81969	tr|Q81969|Q81969_HPV59 Probable protein E5 OS=Human papillomavirus type 59 OX=37115 GN=ORF putative E5 PE=3 SV=1	1	MITLVFVCCVCVCLCVCCNVP
0.35	A0A0A0YKA3	tr|A0A0A0YKA3|A0A0A0YKA3_CVHOC Spike glycoprotein OS=Human coronavirus OC43 OX=31631 GN=S PE=3 SV=1	1326	CTGCGTSCFKKCGCCCDDYTG
0.35	A0A514QQ06	tr|A0A514QQ06|A0A514QQ06_HEV Protein ORF3 OS=Hepatitis E virus OX=12461 PE=3 SV=1	3	MPPCALGLFCFCSSCFCLCCP
0.35	Q2IB34	tr|Q2IB34|Q2IB34_HEV Protein ORF3 OS=Hepatitis E virus OX=12461 PE=2 SV=1	3	MPSCALGLFCFCSSCFCLCCP
0.35	A0A481WCT8	tr|A0A481WCT8|A0A481WCT8_HEV Protein ORF3 (Fragment) OS=Hepatitis E virus OX=12461 PE=3 SV=1	3	MPPCALGLFCFCSSCFCLCCP
0.35	Q4LES5	tr|Q4LES5|Q4LES5_HEV Protein ORF3 OS=Hepatitis E virus OX=12461 PE=3 SV=1	3	MPPCALGLFCFCSSCFCLCCP
0.35	Q2IB33	tr|Q2IB33|Q2IB33_HEV Protein ORF3 OS=Hepatitis E virus OX=12461 PE=2 SV=1	3	MPPCALGLFCFCSSCFCLCCP
0.35	Q2IAY5	tr|Q2IAY5|Q2IAY5_HEV Protein ORF3 OS=Hepatitis E virus OX=12461 PE=2 SV=1	3	MPPCALGLFCFCSSCFCLCCP
0.35	Q2IAY8	tr|Q2IAY8|Q2IAY8_HEV Protein ORF3 OS=Hepatitis E virus OX=12461 PE=2 SV=1	3	MPPCALGLFCFCSSCFCLCCP
0.35	H9BC70	tr|H9BC70|H9BC70_HEV Protein ORF3 (Fragment) OS=Hepatitis E virus OX=12461 PE=3 SV=1	6	GSSCALGLFCFCSSCFCLCCP
0.35	Q2HXC7	tr|Q2HXC7|Q2HXC7_HEV Protein ORF3 OS=Hepatitis E virus OX=12461 PE=3 SV=1	3	MPPCALGLFCFCSSCFCLCCP
0.35	Q81877	tr|Q81877|Q81877_HEV Protein ORF3 OS=Hepatitis E virus OX=12461 PE=3 SV=1	12	WRPCALGLFCCCSSCFCLSCP
0.35	A0A411PYX6	tr|A0A411PYX6|A0A411PYX6_HEV Protein ORF3 OS=Hepatitis E virus OX=12461 PE=3 SV=1	11	GSPCALGLFCGCSSCFCLCCP
0.35	A0A481WC78	tr|A0A481WC78|A0A481WC78_HEV Protein ORF3 (Fragment) OS=Hepatitis E virus OX=12461 PE=3 SV=1	3	MPPCALGLFCFCSSCFCLCCP
0.35	G9G9X3	tr|G9G9X3|G9G9X3_HEV Protein ORF3 (Fragment) OS=Hepatitis E virus OX=12461 PE=3 SV=1	1	ALGLFCCCSSCFCLCCPRHRP
0.35	Q2IAY7	tr|Q2IAY7|Q2IAY7_HEV Protein ORF3 OS=Hepatitis E virus OX=12461 PE=2 SV=1	3	MPPCALGLFCFCSSCFCLCCP
0.35	F2XMT7	tr|F2XMT7|F2XMT7_HEV Protein ORF3 OS=Hepatitis E virus OX=12461 PE=3 SV=1	1	MPPCALGLFCFCSSCFCLCCP
0.35	G9G9X2	tr|G9G9X2|G9G9X2_HEV Protein ORF3 (Fragment) OS=Hepatitis E virus OX=12461 PE=3 SV=1	1	RLGLFCCCSSCFCLCCPRHRP
0.35	M1VQ45	tr|M1VQ45|M1VQ45_HEV Protein ORF3 (Fragment) OS=Hepatitis E virus OX=12461 GN=ORF3 PE=3 SV=1	3	MPPCALGLFCFCSSCFCLCCP
0.35	M1V4Z1	tr|M1V4Z1|M1V4Z1_HEV Protein ORF3 (Fragment) OS=Hepatitis E virus OX=12461 GN=ORF3 PE=3 SV=1	3	MPPCALGLFCFCSSCFCLCCP
0.35	T2A6T2	tr|T2A6T2|T2A6T2_HPV59 Probable protein E5 OS=Human papillomavirus type 59 OX=37115 GN=E5 PE=3 SV=1	1	MITLVFVCCVCVCLCVCCNVP
0.3	A0A384RJY2	tr|A0A384RJY2|A0A384RJY2_CVH22 Spike glycoprotein OS=Human coronavirus 229E OX=11137 GN=S PE=4 SV=1	1133	LCCCSTGCCGFFSCFASSIRG
0.3	A0A5C2D4L1	tr|A0A5C2D4L1|A0A5C2D4L1_CVH22 Spike protein OS=Human coronavirus 229E OX=11137 PE=4 SV=1	1133	LCCCSTGCCGFFSCFASSIRG
0.3	D5LXC4	tr|D5LXC4|D5LXC4_HCMVT Protein UL133 OS=Human cytomegalovirus (strain Towne) OX=10363 GN=UL133 PE=4 SV=1	76	IDILTCRWVRYCSCSCKCSCK
0.3	A0A1V0BZ86	tr|A0A1V0BZ86|A0A1V0BZ86_CVH22 S protein OS=Human coronavirus 229E OX=11137 PE=4 SV=1	1133	LCCCSTGCCGFFSCFASSIRG
0.3	A0A1B3TN99	tr|A0A1B3TN99|A0A1B3TN99_CVH22 S OS=Human coronavirus 229E OX=11137 PE=4 SV=1	1133	LCCCSTGCCGFFSCFASSIRG
0.3	A0A1W6DZS3	tr|A0A1W6DZS3|A0A1W6DZS3_CVH22 Spike protein OS=Human coronavirus 229E OX=11137 PE=4 SV=1	1133	LCCCSTGCCGFFSCFASSIKG
0.3	Q6TVY0	tr|Q6TVY0|Q6TVY0_ORFV Uncharacterized protein OS=Orf virus OX=10258 PE=4 SV=1	147	YKQGLCDCCCKMFPCCKELKD
0.3	A0A2S0DGX5	tr|A0A2S0DGX5|A0A2S0DGX5_ORFV Uncharacterized protein OS=Orf virus OX=10258 PE=4 SV=1	145	YKQGLCNCCCRMFPCCKEIKD
0.3	T2A566	tr|T2A566|T2A566_HPV18 Probable protein E5 OS=Human papillomavirus type 18 OX=333761 GN=E5 PE=3 SV=1	8	FCFCVCMYVCCHVPLLPSVCM
0.3	J9VBQ8	tr|J9VBQ8|J9VBQ8_CVH22 Spike protein OS=Human coronavirus 229E OX=11137 PE=4 SV=1	1132	LCCCSTGCCGFFSCFASSIRG
0.3	A0A384R2L9	tr|A0A384R2L9|A0A384R2L9_CVH22 Spike glycoprotein OS=Human coronavirus 229E OX=11137 GN=S PE=4 SV=1	1132	LCCCSTGCCGFFSCFASSIRG
0.3	Q19QX1	tr|Q19QX1|Q19QX1_SARS 3C-like proteinase OS=Severe acute respiratory syndrome coronavirus OX=694009 PE=3 SV=1	3750	GNTLQCIMLVYCFLGYCCCCY
0.3	J9TE70	tr|J9TE70|J9TE70_SARS 3C-like proteinase OS=Severe acute respiratory syndrome coronavirus OX=694009 GN=PP1a PE=3 SV=1	3750	GNTLQCIMLVYCFLGYCCCCY
0.3	A0A0N7I6R5	tr|A0A0N7I6R5|A0A0N7I6R5_HPV82 Probable protein E5 (Fragment) OS=Human papillomavirus type 82 OX=129724 GN=E5 PE=3 SV=1	5	AVFLVCLFVLCVCVCLVLCCL
0.3	A0A1W6S776	tr|A0A1W6S776|A0A1W6S776_SARS 3C-like proteinase OS=Severe acute respiratory syndrome coronavirus OX=694009 PE=3 SV=1	3750	GNTLQCIMLVYCFLGYCCCCY
0.3	A0A0N7I6Q9	tr|A0A0N7I6Q9|A0A0N7I6Q9_HPV82 Probable protein E5 (Fragment) OS=Human papillomavirus type 82 OX=129724 GN=E5 PE=3 SV=1	5	AVFLVCLFVLCVCVCLVLCCL
0.3	A0A0N7I6R4	tr|A0A0N7I6R4|A0A0N7I6R4_HPV82 Probable protein E5 (Fragment) OS=Human papillomavirus type 82 OX=129724 GN=E5 PE=3 SV=1	5	AVFLVCLFVLCVCVCLVLCCL
0.3	A0A0N7I6R9	tr|A0A0N7I6R9|A0A0N7I6R9_HPV82 Probable protein E5 (Fragment) OS=Human papillomavirus type 82 OX=129724 GN=E5 PE=3 SV=1	5	AVFLVCLFVLCVCVCLVLCCL
0.3	A0A0N7I6R0	tr|A0A0N7I6R0|A0A0N7I6R0_HPV82 Probable protein E5 (Fragment) OS=Human papillomavirus type 82 OX=129724 GN=E5 PE=3 SV=1	5	AVFLVCLFVLCVCVCLVLCCL
0.3	Q1HVK6	tr|Q1HVK6|Q1HVK6_CVH22 Spike glycoprotein OS=Human coronavirus 229E OX=11137 GN=S PE=4 SV=1	1132	LCCCSTGCCGFFSCFASSIRG
0.3	A0A384R9G0	tr|A0A384R9G0|A0A384R9G0_CVH22 Spike glycoprotein OS=Human coronavirus 229E OX=11137 GN=S PE=4 SV=1	1133	LCCCSTGCCGFFSCFASSIRG
0.3	A0A384RBT6	tr|A0A384RBT6|A0A384RBT6_CVH22 Spike glycoprotein OS=Human coronavirus 229E OX=11137 GN=S PE=4 SV=1	1132	LCCCSTGCCGFFSCFASSIRG
0.3	A0A1V0E0W8	tr|A0A1V0E0W8|A0A1V0E0W8_CVH22 S protein OS=Human coronavirus 229E OX=11137 PE=4 SV=1	1132	LCCCSTGCCGFFSCFASSIRG
0.3	Q1HVL0	tr|Q1HVL0|Q1HVL0_CVH22 Spike glycoprotein OS=Human coronavirus 229E OX=11137 GN=S PE=4 SV=1	1132	LCCCSTGCCGFFSCFASSIRG
0.3	Q9IR54	tr|Q9IR54|Q9IR54_HPV82 Probable protein E5 (Fragment) OS=Human papillomavirus type 82 OX=129724 GN=E5 PE=3 SV=1	6	AVFLVCLFVLCVCVCLVLCCL
0.3	A0A0N7I6R1	tr|A0A0N7I6R1|A0A0N7I6R1_HPV82 Probable protein E5 (Fragment) OS=Human papillomavirus type 82 OX=129724 GN=E5 PE=3 SV=1	5	AVFLVCLFVLCVCVCLVLCCL
0.3	A0A0N7I6S0	tr|A0A0N7I6S0|A0A0N7I6S0_HPV82 Probable protein E5 (Fragment) OS=Human papillomavirus type 82 OX=129724 GN=E5 PE=3 SV=1	5	AVFLVCLFVLCVCVCLVLCCL
0.3	Q1HVL3	tr|Q1HVL3|Q1HVL3_CVH22 Spike glycoprotein OS=Human coronavirus 229E OX=11137 GN=S PE=1 SV=1	1132	LCCCSTGCCGFFSCFASSIRG
0.3	D3ITW0	tr|D3ITW0|D3ITW0_HPV18 Probable protein E5 OS=Human papillomavirus type 18 OX=333761 PE=3 SV=1	8	FCFCVCMYVCCHVPLLPSVCM
0.3	A0A0N7I6S1	tr|A0A0N7I6S1|A0A0N7I6S1_HPV82 Probable protein E5 (Fragment) OS=Human papillomavirus type 82 OX=129724 GN=E5 PE=3 SV=1	5	AVFLVCLFVLCVCVCLVLCCL
0.3	A0A024A7C0	tr|A0A024A7C0|A0A024A7C0_HPV82 Probable protein E5 (Fragment) OS=Human papillomavirus type 82 OX=129724 GN=E5 PE=3 SV=1	5	AVFLVCLFVLCVCVCLVLCCL
0.3	A0A0N7I6Q8	tr|A0A0N7I6Q8|A0A0N7I6Q8_HPV82 Probable protein E5 (Fragment) OS=Human papillomavirus type 82 OX=129724 GN=E5 PE=3 SV=1	5	AVFLVCLFVLCVCVCLVLCCL
0.3	A0A0N7I6Q7	tr|A0A0N7I6Q7|A0A0N7I6Q7_HPV82 Probable protein E5 (Fragment) OS=Human papillomavirus type 82 OX=129724 GN=E5 PE=3 SV=1	5	AVFLVCLFVLCVCVCLVLCCL
0.3	A0A0N7I6R8	tr|A0A0N7I6R8|A0A0N7I6R8_HPV82 Probable protein E5 (Fragment) OS=Human papillomavirus type 82 OX=129724 GN=E5 PE=3 SV=1	5	AVFLVCLFVLCVCVCLVLCCL
0.3	A0A0F6N233	tr|A0A0F6N233|A0A0F6N233_ORFV Uncharacterized protein OS=Orf virus OX=10258 PE=4 SV=1	141	YKQGLCNCCCRMFPCCKEIKD
0.3	A0A6H1XQS8	tr|A0A6H1XQS8|A0A6H1XQS8_ORFV Uncharacterized protein OS=Orf virus OX=10258 GN=ORFV120 PE=4 SV=1	144	YKQGLCDCCCRMFPCCRELKD
0.3	A0A0N7I6R6	tr|A0A0N7I6R6|A0A0N7I6R6_HPV82 Probable protein E5 (Fragment) OS=Human papillomavirus type 82 OX=129724 GN=E5 PE=3 SV=1	5	AVFLVCLFVLCVCVCLVLCCL
0.3	A0A0N7I6Q6	tr|A0A0N7I6Q6|A0A0N7I6Q6_HPV82 Probable protein E5 (Fragment) OS=Human papillomavirus type 82 OX=129724 GN=E5 PE=3 SV=1	5	AVFLVCLFVLCVCVCLVLCCL
0.3	A0A0N7I6R3	tr|A0A0N7I6R3|A0A0N7I6R3_HPV82 Probable protein E5 (Fragment) OS=Human papillomavirus type 82 OX=129724 GN=E5 PE=3 SV=1	5	AVFLVCLFVLCVCVCLVLCCL
0.3	A9XFK3	tr|A9XFK3|A9XFK3_HPV18 Probable protein E5 OS=Human papillomavirus type 18 OX=333761 PE=3 SV=1	9	CFCVCLYVCCHVLLLPSVCMC
0.3	Q993Z5	tr|Q993Z5|Q993Z5_HPV82 Probable protein E5 (Fragment) OS=Human papillomavirus type 82 OX=129724 GN=E5 PE=3 SV=1	5	AVFLVCLFVLCVCVCLVLCCL
0.3	A0A0N7I6R7	tr|A0A0N7I6R7|A0A0N7I6R7_HPV82 Probable protein E5 (Fragment) OS=Human papillomavirus type 82 OX=129724 GN=E5 PE=3 SV=1	5	AVFLVCLFVLCVCVCLVLCCL
0.3	Q2F854	tr|Q2F854|Q2F854_ORFV Uncharacterized protein OS=Orf virus OX=10258 PE=4 SV=1	149	YKQGLCNCCCKFPCCKELKDY
0.3	B8YEF5	tr|B8YEF5|B8YEF5_HCMVA Protein UL133 OS=Human cytomegalovirus (strain AD169) OX=10360 GN=UL133 PE=4 SV=1	76	IDILTCRWVRYCSCSCKCSCK
0.3	C8YZ74	tr|C8YZ74|C8YZ74_SARS 3C-like proteinase OS=Severe acute respiratory syndrome coronavirus OX=694009 PE=3 SV=1	3750	GNTLQCIMLVYCFLGYCCCCY
0.3	A0A0N7I6S2	tr|A0A0N7I6S2|A0A0N7I6S2_HPV82 Probable protein E5 (Fragment) OS=Human papillomavirus type 82 OX=129724 GN=E5 PE=3 SV=1	5	AVFLVCLFVLCVCVCLVLCCL
0.3	Q19QX2	tr|Q19QX2|Q19QX2_SARS 2'-O-methyltransferase OS=Severe acute respiratory syndrome coronavirus OX=694009 PE=3 SV=1	3750	GNTLQCIMLVYCFLGYCCCCY
0.3	A0A1L7B944	tr|A0A1L7B944|A0A1L7B944_CVH22 S OS=Human coronavirus 229E OX=11137 PE=4 SV=1	1133	LCCCSTGCCGFFSCFASSIRG
0.3	P0C6U8	sp|P0C6U8|R1A_SARS Replicase polyprotein 1a OS=Severe acute respiratory syndrome coronavirus OX=694009 GN=1a PE=1 SV=1	3750	GNTLQCIMLVYCFLGYCCCCY
0.3	Q6SW10	sp|Q6SW10|UL133_HCMVM Protein UL133 OS=Human cytomegalovirus (strain Merlin) OX=295027 GN=UL133 PE=4 SV=1	76	IDLLTCRWVRYCSCSCKCSCK
0.3	P0C6X7	sp|P0C6X7|R1AB_SARS Replicase polyprotein 1ab OS=Severe acute respiratory syndrome coronavirus OX=694009 GN=rep PE=1 SV=1	3750	GNTLQCIMLVYCFLGYCCCCY
0.3	E2ESA1	tr|E2ESA1|E2ESA1_EBVG Latent membrane protein 2A (Fragment) OS=Epstein-Barr virus (strain GD1) OX=10376 GN=LMP2A PE=4 SV=1	351	IRCCRYCCYCCLTLESEERPP
0.3	D2W9T9	tr|D2W9T9|D2W9T9_HCMV Protein UL133 OS=Human cytomegalovirus OX=10359 GN=UL133 PE=4 SV=1	76	IDILTCRWVRYCSCSCKCSCK
0.3	A0A0G2UD26	tr|A0A0G2UD26|A0A0G2UD26_HCMV Protein UL133 OS=Human cytomegalovirus OX=10359 GN=UL133 PE=4 SV=1	76	IDILTCRWVRYCSCSCKCSCK
0.3	V9LNQ7	tr|V9LNQ7|V9LNQ7_HCMV Protein UL133 OS=Human cytomegalovirus OX=10359 GN=UL133 PE=4 SV=1	76	IDILTCRWVRYCSCSCKCSCK
0.3	A0A140D1Y0	tr|A0A140D1Y0|A0A140D1Y0_HCMV Protein UL133 OS=Human cytomegalovirus OX=10359 GN=UL133 PE=4 SV=1	76	IDLLTCRWVRYCSCSCKCSCK
0.3	A0A0R5ED43	tr|A0A0R5ED43|A0A0R5ED43_HCMV Protein UL133 OS=Human cytomegalovirus OX=10359 GN=UL133 PE=4 SV=1	76	IDLLTCRWVRYCSCSCKCSCK
0.3	A0A126NC36	tr|A0A126NC36|A0A126NC36_HCMV Protein UL133 OS=Human cytomegalovirus OX=10359 GN=UL133 PE=4 SV=1	76	IDVFTCRWVRYCSCSCKCSCK
0.3	V9PUH8	tr|V9PUH8|V9PUH8_HCMV Protein UL133 OS=Human cytomegalovirus OX=10359 GN=UL133 PE=4 SV=1	76	IDILTCRWVRYCSCSCKCSCK
0.3	Q5PX08	tr|Q5PX08|Q5PX08_HCMV UL133 OS=Human cytomegalovirus OX=10359 PE=4 SV=1	76	IDLLTCRWVRYCSCSCKCNCK
0.3	Q5PX09	tr|Q5PX09|Q5PX09_HCMV UL133 OS=Human cytomegalovirus OX=10359 PE=4 SV=1	75	IDLLTCRWVRYCSCSCKCSCK
0.3	V9PTS6	tr|V9PTS6|V9PTS6_HCMV Protein UL133 OS=Human cytomegalovirus OX=10359 GN=UL133 PE=4 SV=1	75	IDVFTCRWVRYCSCSCKCSCK
0.3	A0A0G2TC27	tr|A0A0G2TC27|A0A0G2TC27_HCMV Protein UL133 OS=Human cytomegalovirus OX=10359 GN=UL133 PE=4 SV=1	76	IDLLTCRWVRYCSCSCKCSCK
0.3	Q52N54	tr|Q52N54|Q52N54_HCMV UL133 OS=Human cytomegalovirus OX=10359 PE=4 SV=1	76	IDLLTCRWVRYCSCSCKCSCK
0.3	Q52N48	tr|Q52N48|Q52N48_HCMV UL133 OS=Human cytomegalovirus OX=10359 PE=4 SV=1	76	IDVFTCRWVRYCSCSCRCSCK
0.3	L7X0H8	tr|L7X0H8|L7X0H8_HCMV UL133 OS=Human cytomegalovirus OX=10359 GN=UL133 PE=4 SV=1	75	IDLLTCRWVRYCSCSCKCNCK
0.3	L7X1F3	tr|L7X1F3|L7X1F3_HCMV UL133 OS=Human cytomegalovirus OX=10359 GN=UL133 PE=4 SV=1	76	IDVFTCRWVRYCSCSCKCSCK
0.3	Q5PX17	tr|Q5PX17|Q5PX17_HCMV UL133 OS=Human cytomegalovirus OX=10359 PE=4 SV=1	76	IDLLTCRWVRYCSCSCKCSCK
0.3	V9LNW3	tr|V9LNW3|V9LNW3_HCMV Protein UL133 OS=Human cytomegalovirus OX=10359 GN=UL133 PE=4 SV=1	76	IDILTCRWVRYCSCSCKCSCK
0.3	C8CFH2	tr|C8CFH2|C8CFH2_HCMV Protein UL133 OS=Human cytomegalovirus OX=10359 GN=UL133 PE=4 SV=1	76	LDILTCRWVRYCSCSCKCSCK
0.3	W5U3T4	tr|W5U3T4|W5U3T4_ORFV Uncharacterized protein OS=Orf virus OX=10258 PE=4 SV=1	142	YKQGLCNCCCKMFPCCKELKD
0.3	A0A223FUI6	tr|A0A223FUI6|A0A223FUI6_CVH22 Spike protein OS=Human coronavirus 229E OX=11137 PE=4 SV=1	1133	LCCCSTGCCGFFSCFASSIRG
0.3	Q1HVK9	tr|Q1HVK9|Q1HVK9_CVH22 Spike glycoprotein OS=Human coronavirus 229E OX=11137 GN=S PE=4 SV=1	1132	LCCCSTGCCGFFSCFASSIRG
0.3	H1AG30	tr|H1AG30|H1AG30_CVH22 Spike protein OS=Human coronavirus 229E OX=11137 GN=S PE=4 SV=1	1132	LCCCSTGCCGFFSCFASSIRG
0.3	S5YGT1	tr|S5YGT1|S5YGT1_CVH22 Spike glycoprotein OS=Human coronavirus 229E OX=11137 GN=S PE=3 SV=1	1132	LCCCSTGCCGFFSCFASSIRG
0.3	Q1HVK3	tr|Q1HVK3|Q1HVK3_CVH22 Spike glycoprotein OS=Human coronavirus 229E OX=11137 GN=S PE=4 SV=1	1132	LCCCSTGCCGFFSCFASSIRG
0.3	Q1HVL7	tr|Q1HVL7|Q1HVL7_CVH22 Spike glycoprotein OS=Human coronavirus 229E OX=11137 GN=S PE=3 SV=1	1132	LCCCSTGCCGFFSCFASSIRG
0.3	A0A2S1PV28	tr|A0A2S1PV28|A0A2S1PV28_CVH22 Spike protein OS=Human coronavirus 229E OX=11137 PE=4 SV=1	1133	LCCCSTGCCGFFSCFASSIKG
0.3	H1AG32	tr|H1AG32|H1AG32_CVH22 Spike protein OS=Human coronavirus 229E OX=11137 GN=S PE=4 SV=1	1132	LCCCSTGCCGFFSCFASSIRG
0.3	Q1HVL8	tr|Q1HVL8|Q1HVL8_CVH22 Spike glycoprotein OS=Human coronavirus 229E OX=11137 GN=S PE=1 SV=1	1132	LCCCSTGCCGFFSCFASSIRG
0.3	A0A3S6GS72	tr|A0A3S6GS72|A0A3S6GS72_SARS 2'-O-methyltransferase OS=Severe acute respiratory syndrome coronavirus OX=694009 GN=orf1ab PE=3 SV=1	3727	GNTLQCVMLVYCCLGYFCCCY
0.3	A0A384RBT4	tr|A0A384RBT4|A0A384RBT4_CVH22 Spike glycoprotein OS=Human coronavirus 229E OX=11137 GN=S PE=4 SV=1	1133	LCCCSTGCCGFFSCFASSIRG
0.3	H1AG29	tr|H1AG29|H1AG29_CVH22 Spike glycoprotein OS=Human coronavirus 229E OX=11137 GN=S PE=3 SV=1	1135	LCCCSTGCCGFFSCFASSIRG
0.3	A0A384RNP7	tr|A0A384RNP7|A0A384RNP7_CVH22 Spike glycoprotein OS=Human coronavirus 229E OX=11137 GN=S PE=4 SV=1	1133	LCCCSTGCCGFFSCFASSIRG
0.3	A0A5B9MYJ0	tr|A0A5B9MYJ0|A0A5B9MYJ0_CVH22 Spike protein OS=Human coronavirus 229E OX=11137 PE=4 SV=1	1133	LCCCSTGCCGFFSCFASSIRG
0.3	A0A1L7B942	tr|A0A1L7B942|A0A1L7B942_CVH22 S OS=Human coronavirus 229E OX=11137 PE=4 SV=1	1133	LCCCSTGCCGFFSCFASSIKG
0.3	A0A384RJY8	tr|A0A384RJY8|A0A384RJY8_CVH22 Spike glycoprotein OS=Human coronavirus 229E OX=11137 GN=S PE=4 SV=1	1132	LCCCSTGCCGFFSCFASSIRG
0.3	A0A384QXY4	tr|A0A384QXY4|A0A384QXY4_CVH22 Spike glycoprotein OS=Human coronavirus 229E OX=11137 GN=S PE=4 SV=1	1132	LCCCSTGCCGFFSCFASSIRG
0.3	Q1HVK4	tr|Q1HVK4|Q1HVK4_CVH22 Spike glycoprotein OS=Human coronavirus 229E OX=11137 GN=S PE=4 SV=1	1132	LCCCSTGCCGFFSCFASSIRG
0.3	Q1HVM6	tr|Q1HVM6|Q1HVM6_CVH22 Spike glycoprotein OS=Human coronavirus 229E OX=11137 GN=S PE=3 SV=1	1135	LCCCSTGCCGFFSCFASSIRG
0.3	A0A384RK44	tr|A0A384RK44|A0A384RK44_CVH22 Spike glycoprotein OS=Human coronavirus 229E OX=11137 GN=S PE=4 SV=1	1132	LCCCSTGCCGFFSCFASSIRG
0.3	J9UWK8	tr|J9UWK8|J9UWK8_CVH22 Spike protein OS=Human coronavirus 229E OX=11137 PE=4 SV=1	1133	LCCCSTGCCGFFSCFASSIRG
0.3	T2A4I7	tr|T2A4I7|T2A4I7_HPV18 Probable protein E5 OS=Human papillomavirus type 18 OX=333761 GN=E5 PE=3 SV=1	8	FCFCVCLYVCCHVPLLPSVCM
0.3	Q1HVK5	tr|Q1HVK5|Q1HVK5_CVH22 Spike glycoprotein OS=Human coronavirus 229E OX=11137 GN=S PE=4 SV=1	1132	LCCCSTGCCGFFSCFASSIRG
0.3	A0A1L7B8Z9	tr|A0A1L7B8Z9|A0A1L7B8Z9_CVH22 S OS=Human coronavirus 229E OX=11137 PE=4 SV=1	1133	LCCCSTGCCGFFSCFASSIKG
0.3	J9TBE8	tr|J9TBE8|J9TBE8_SARS 2'-O-methyltransferase OS=Severe acute respiratory syndrome coronavirus OX=694009 GN=PP1ab PE=3 SV=1	3750	GNTLQCIMLVYCFLGYCCCCY
0.3	S5YAI3	tr|S5YAI3|S5YAI3_CVH22 Spike glycoprotein OS=Human coronavirus 229E OX=11137 GN=S PE=3 SV=1	1132	LCCCSTGCCGFFSCFASSIRG
0.3	S5YGU2	tr|S5YGU2|S5YGU2_CVH22 Spike glycoprotein OS=Human coronavirus 229E OX=11137 GN=S PE=3 SV=1	1132	LCCCSTGCCGFFSCFASSIRG
0.3	A0A1L7B931	tr|A0A1L7B931|A0A1L7B931_CVH22 S OS=Human coronavirus 229E OX=11137 PE=4 SV=1	1133	LCCCSTGCCGFFSCFASSIRG
0.3	A0A384QXM2	tr|A0A384QXM2|A0A384QXM2_CVH22 Spike glycoprotein OS=Human coronavirus 229E OX=11137 GN=S PE=4 SV=1	1132	LCCCSTGCCGFFSCFASSIRG
0.3	A0A3S6FIX6	tr|A0A3S6FIX6|A0A3S6FIX6_CVHOC Spike glycoprotein OS=Human coronavirus OC43 OX=31631 GN=S PE=3 SV=1	1326	CTGCGTSCFKKCGGCCDDYTG
0.3	A0A0B4N608	tr|A0A0B4N608|A0A0B4N608_CVHOC Spike glycoprotein OS=Human coronavirus OC43 OX=31631 GN=S PE=3 SV=1	1326	CTGCGTSCFKKCGGCCDDYTG
0.3	A0A1S5VGH2	tr|A0A1S5VGH2|A0A1S5VGH2_CVHOC Spike glycoprotein OS=Human coronavirus OC43 OX=31631 GN=S PE=3 SV=1	1326	CTGCGTSCFKKCGGCCDDYTG
0.3	A0A0B4N604	tr|A0A0B4N604|A0A0B4N604_CVHOC Spike glycoprotein OS=Human coronavirus OC43 OX=31631 GN=S PE=3 SV=1	1326	CTGCGTSCFKKCGGCCDDYTG
0.3	A0A0B4N5Z6	tr|A0A0B4N5Z6|A0A0B4N5Z6_CVHOC Spike glycoprotein OS=Human coronavirus OC43 OX=31631 GN=S PE=3 SV=1	1326	CTGCGTSCFKKCGGCCEDYTG
0.3	A0A0B4N6K6	tr|A0A0B4N6K6|A0A0B4N6K6_CVHOC Spike glycoprotein OS=Human coronavirus OC43 OX=31631 GN=S PE=3 SV=1	1326	CTGCGTSCFKKCGGCCDDYTG
0.3	A0A0B4N6L9	tr|A0A0B4N6L9|A0A0B4N6L9_CVHOC Spike glycoprotein OS=Human coronavirus OC43 OX=31631 GN=S PE=3 SV=1	1326	CTGCGTSCFKKCGGCCDDYTG
0.3	Q4VID5	tr|Q4VID5|Q4VID5_CVHOC Spike glycoprotein OS=Human coronavirus OC43 OX=31631 GN=S PE=3 SV=1	1329	CTGCGTSCFKKCGGCCDDYTG
0.3	A0A0B4N6A9	tr|A0A0B4N6A9|A0A0B4N6A9_CVHOC Spike glycoprotein OS=Human coronavirus OC43 OX=31631 GN=S PE=3 SV=1	1326	CTGCGTSCFKKCGGCCDDYTG
0.3	U3M6X6	tr|U3M6X6|U3M6X6_CVHOC Spike glycoprotein OS=Human coronavirus OC43 OX=31631 GN=S PE=3 SV=1	1324	CTGCGTSCFKKCGGCCDDYTG
0.3	Q1HVL4	tr|Q1HVL4|Q1HVL4_CVH22 Spike glycoprotein OS=Human coronavirus 229E OX=11137 GN=S PE=3 SV=1	1132	LCCCSTGCCGFFSCFASSIRG
0.3	A0A5S9EFI7	tr|A0A5S9EFI7|A0A5S9EFI7_HCMV Protein UL133 OS=Human cytomegalovirus OX=10359 GN=UL133 PE=4 SV=1	76	IDILTCRWVRYCSCSCKCSCK
0.3	U3M7N4	tr|U3M7N4|U3M7N4_CVHOC Spike glycoprotein OS=Human coronavirus OC43 OX=31631 GN=S PE=3 SV=1	1328	CTGCGTSCFKKCGGCCDDYTG
0.3	A0A059SGA9	tr|A0A059SGA9|A0A059SGA9_CVH22 Spike glycoprotein OS=Human coronavirus 229E OX=11137 GN=S PE=3 SV=1	1135	LCCCSTGCCGFFSCFASSIRG
0.3	A0A0B4Q908	tr|A0A0B4Q908|A0A0B4Q908_CVHOC Spike glycoprotein OS=Human coronavirus OC43 OX=31631 GN=S PE=3 SV=1	1330	CTGCGTSCFKKCGGCCDDYTG
0.3	A0A0B4N6Y5	tr|A0A0B4N6Y5|A0A0B4N6Y5_CVHOC Spike glycoprotein OS=Human coronavirus OC43 OX=31631 GN=S PE=3 SV=1	1330	CTGCGTSCFKKCGGCCDDYTG
0.3	H1AG33	tr|H1AG33|H1AG33_CVH22 Spike glycoprotein OS=Human coronavirus 229E OX=11137 GN=S PE=4 SV=1	1132	LCCCSTGCCGFFSCFASSIRG
0.3	A0A0B4N5X0	tr|A0A0B4N5X0|A0A0B4N5X0_CVHOC Spike glycoprotein OS=Human coronavirus OC43 OX=31631 GN=S PE=3 SV=1	1330	CTGCGTSCFKKCGGCCDDYTG
0.3	A0A0B4N6M2	tr|A0A0B4N6M2|A0A0B4N6M2_CVHOC Spike glycoprotein OS=Human coronavirus OC43 OX=31631 GN=S PE=3 SV=1	1326	CTGCGTSCFKKCGGCCDDYTG
0.3	Q1HVL1	tr|Q1HVL1|Q1HVL1_CVH22 Spike glycoprotein OS=Human coronavirus 229E OX=11137 GN=S PE=4 SV=1	1132	LCCCSTGCCGFFSCFASSIRG
0.3	U3M6X0	tr|U3M6X0|U3M6X0_CVHOC Spike glycoprotein OS=Human coronavirus OC43 OX=31631 GN=S PE=3 SV=1	1324	CTGCGTSCFKKCGGCCDDYTG
0.3	A0A0B4UE97	tr|A0A0B4UE97|A0A0B4UE97_CVHOC Spike glycoprotein OS=Human coronavirus OC43 OX=31631 GN=S PE=3 SV=1	1330	CTGCGTSCFKKCGGCCDDYTG
0.3	A0A0B4N6J8	tr|A0A0B4N6J8|A0A0B4N6J8_CVHOC Spike glycoprotein OS=Human coronavirus OC43 OX=31631 GN=S PE=3 SV=1	1329	CTGCGTSCFKKCGGCCDDYTG
0.3	A0A0B4N694	tr|A0A0B4N694|A0A0B4N694_CVHOC Spike glycoprotein OS=Human coronavirus OC43 OX=31631 GN=S PE=3 SV=1	1326	CTGCGTSCFKKCGGCCDDYTG
0.3	F5HGD2	tr|F5HGD2|F5HGD2_HCMV Protein UL133 OS=Human cytomegalovirus OX=10359 GN=UL133 PE=4 SV=1	76	IDLLTCRWVRYCSCSCKCSCK
0.3	A0A3G2M292	tr|A0A3G2M292|A0A3G2M292_ORFV Uncharacterized protein OS=Orf virus OX=10258 GN=ORFV120 PE=4 SV=1	143	YKQGLCDCCCRMFPCCRELKD
0.3	A0A0B4N6Y8	tr|A0A0B4N6Y8|A0A0B4N6Y8_CVHOC Spike glycoprotein OS=Human coronavirus OC43 OX=31631 GN=S PE=3 SV=1	1330	CTGCGTSCFKKCGGCCDDYTG
0.3	C5MKX9	tr|C5MKX9|C5MKX9_HCMV Protein UL133 OS=Human cytomegalovirus OX=10359 GN=UL133 PE=4 SV=1	76	IDLLTCRWVRYCSCSCKCSCK
0.3	A0A0G2TP78	tr|A0A0G2TP78|A0A0G2TP78_HCMV Protein UL133 OS=Human cytomegalovirus OX=10359 GN=UL133 PE=4 SV=1	76	IDLLTCRWVRYCSCSCKCNCK
0.3	U3M6B4	tr|U3M6B4|U3M6B4_CVHOC Spike glycoprotein OS=Human coronavirus OC43 OX=31631 GN=S PE=3 SV=1	1324	CTGCGTSCFKKCGGCCDDYTG
0.3	A0A0B4N6B8	tr|A0A0B4N6B8|A0A0B4N6B8_CVHOC Spike glycoprotein OS=Human coronavirus OC43 OX=31631 GN=S PE=3 SV=1	1326	CTGCGTSCFKKCGGCCDDYTG
0.3	A9XFJ5	tr|A9XFJ5|A9XFJ5_HPV18 Probable protein E5 OS=Human papillomavirus type 18 OX=333761 GN=E5 PE=3 SV=1	8	FCFCVCLYVCCHVPLLPSVCM
0.3	A0A0B4N7L0	tr|A0A0B4N7L0|A0A0B4N7L0_CVHOC Spike glycoprotein OS=Human coronavirus OC43 OX=31631 GN=S PE=3 SV=1	1326	CTGCGTSCFKKCGGCCDDYTG
0.3	A0A385H6Q3	tr|A0A385H6Q3|A0A385H6Q3_CVHOC Spike glycoprotein OS=Human coronavirus OC43 OX=31631 GN=S PE=3 SV=1	1330	CTGCGTSCFKKCGGCCDDYTG
0.3	A0A0B4N708	tr|A0A0B4N708|A0A0B4N708_CVHOC Spike glycoprotein OS=Human coronavirus OC43 OX=31631 GN=S PE=3 SV=1	1326	CTGCGTSCFKKCGGCCDDYTG
0.3	A0A0G2U7V2	tr|A0A0G2U7V2|A0A0G2U7V2_HCMV Protein UL133 OS=Human cytomegalovirus OX=10359 GN=UL133 PE=4 SV=1	76	IDILTCRWVRYCSCSCKCSCK
0.3	V9LQ31	tr|V9LQ31|V9LQ31_HCMV Protein UL133 OS=Human cytomegalovirus OX=10359 GN=UL133 PE=4 SV=1	75	IDLLTCRWVRYCSCSCKCSCK
0.3	A0A482K8T8	tr|A0A482K8T8|A0A482K8T8_CVHOC Spike glycoprotein OS=Human coronavirus OC43 OX=31631 GN=S PE=3 SV=1	1326	CTGCGTSCFKKCGGCCDDYTG
0.3	A0A0B4N7I9	tr|A0A0B4N7I9|A0A0B4N7I9_CVHOC Spike glycoprotein OS=Human coronavirus OC43 OX=31631 GN=S PE=3 SV=1	1326	CTGCGTSCFKKCGGCCDDYTG
0.3	A0A0B4N6A4	tr|A0A0B4N6A4|A0A0B4N6A4_CVHOC Spike glycoprotein OS=Human coronavirus OC43 OX=31631 GN=S PE=3 SV=1	1326	CTGCGTSCFKKCGGCCDDYTG
0.3	A0A0A7CFN3	tr|A0A0A7CFN3|A0A0A7CFN3_HCMV Protein UL133 OS=Human cytomegalovirus OX=10359 GN=UL133 PE=4 SV=1	76	VDLLTCRWVRYCSCSCKCSCK
0.3	Q5PX10	tr|Q5PX10|Q5PX10_HCMV UL133 OS=Human cytomegalovirus OX=10359 PE=4 SV=1	76	IDVFTCRWVRYCSCSCKCSCK
0.3	A0A0B4N7J1	tr|A0A0B4N7J1|A0A0B4N7J1_CVHOC Spike glycoprotein OS=Human coronavirus OC43 OX=31631 GN=S PE=3 SV=1	1326	CTGCGTSCFKKCGGCCDDYTG
0.3	L7X1E4	tr|L7X1E4|L7X1E4_HCMV UL133 OS=Human cytomegalovirus OX=10359 GN=UL133 PE=4 SV=1	75	IDVFTCRWVRYCSCSCKCSCK
0.3	A0A0G2TSQ3	tr|A0A0G2TSQ3|A0A0G2TSQ3_HCMV Protein UL133 OS=Human cytomegalovirus OX=10359 GN=UL133 PE=4 SV=1	75	IDVFTCRWVRYCSCSCKCSCK
0.3	C8BKT0	tr|C8BKT0|C8BKT0_HCMV Protein UL133 OS=Human cytomegalovirus OX=10359 GN=UL133 PE=4 SV=1	75	IDVFTCRWVRYCSCSCKCSCK
0.3	A0A385H5X7	tr|A0A385H5X7|A0A385H5X7_CVHOC Spike glycoprotein OS=Human coronavirus OC43 OX=31631 GN=S PE=3 SV=1	1326	CTGCGTSCFKKCGGCCDDYTG
0.3	Q19U37	tr|Q19U37|Q19U37_CVHK1 Spike glycoprotein OS=Human coronavirus HKU1 OX=290028 GN=S PE=3 SV=1	1324	CTGCGSACFSKCHNCCDEYGG
0.3	Q19U39	tr|Q19U39|Q19U39_CVHK1 Spike glycoprotein OS=Human coronavirus HKU1 OX=290028 GN=S PE=3 SV=1	1319	CTGCGSACFSKCHNCCDEYGG
0.3	A0A0G2U6J3	tr|A0A0G2U6J3|A0A0G2U6J3_HCMV Protein UL133 OS=Human cytomegalovirus OX=10359 GN=UL133 PE=4 SV=1	76	IDLLTCRWVRYCSCSCKCSCK
0.3	Q68385	tr|Q68385|Q68385_HCMVO Orf UL133 OS=Human cytomegalovirus (strain Toledo) OX=311339 GN=UL133 PE=4 SV=1	76	IDLLTCRWVRYCSCSCKCSCK
0.3	A0A0B4Q8M2	tr|A0A0B4Q8M2|A0A0B4Q8M2_CVHOC Spike glycoprotein OS=Human coronavirus OC43 OX=31631 GN=S PE=3 SV=1	1329	CTGCGTSCFKKCGGCCDDYTG
0.3	Q19U40	tr|Q19U40|Q19U40_CVHK1 Spike glycoprotein OS=Human coronavirus HKU1 OX=290028 GN=S PE=3 SV=1	1319	CTGCGSACFSKCHNCCDEYGG
0.3	A0A0G2RCA0	tr|A0A0G2RCA0|A0A0G2RCA0_CVHOC Spike glycoprotein OS=Human coronavirus OC43 OX=31631 GN=S PE=3 SV=1	1330	CTGCGTSCFKKCGGCCDDYTG
0.3	A0A384RJX8	tr|A0A384RJX8|A0A384RJX8_CVH22 Spike glycoprotein OS=Human coronavirus 229E OX=11137 GN=S PE=4 SV=1	1133	LCCCSTGCCGFFSCFASSIRG
0.3	Q6SX20	tr|Q6SX20|Q6SX20_HCMV Protein UL133 OS=Human cytomegalovirus OX=10359 GN=UL133 PE=4 SV=1	76	IDLLTCRWVRYCSCSCKCSCK
0.3	U3M7P6	tr|U3M7P6|U3M7P6_CVHOC Spike glycoprotein OS=Human coronavirus OC43 OX=31631 GN=S PE=3 SV=1	1329	CTGCGTSCFKKCGGCCDDYTG
0.3	Q5PX05	tr|Q5PX05|Q5PX05_HCMV Protein UL133 OS=Human cytomegalovirus OX=10359 GN=UL133 PE=4 SV=1	76	IDVFTCRWVRYCSCSCKCSCK
0.3	A0A0G2TGP9	tr|A0A0G2TGP9|A0A0G2TGP9_HCMV Protein UL133 OS=Human cytomegalovirus OX=10359 GN=UL133 PE=4 SV=1	75	IDVFTCRWVRYCSCSCKCSCK
0.3	A0A0R5EC05	tr|A0A0R5EC05|A0A0R5EC05_HCMV ORFL316C_UL133 OS=Human cytomegalovirus OX=10359 GN=UL133 PE=4 SV=1	76	IDILTCRWVRYCSCSCKCSCK
0.3	U3M7Q0	tr|U3M7Q0|U3M7Q0_CVHOC Spike glycoprotein OS=Human coronavirus OC43 OX=31631 GN=S PE=3 SV=1	1328	CTGCGTSCFKKCGGCCDDYTG
0.3	D6MWS4	tr|D6MWS4|D6MWS4_HCMV Protein UL133 OS=Human cytomegalovirus OX=10359 GN=UL133 PE=4 SV=1	76	IDLLTCRWVRYCSCSCKCSCK
0.3	Q5PX01	tr|Q5PX01|Q5PX01_HCMV Protein UL133 OS=Human cytomegalovirus OX=10359 GN=UL133 PE=4 SV=1	75	IDLLTCRWVRYCSCSCKCSCK
0.3	Q6SWK1	tr|Q6SWK1|Q6SWK1_HCMV Protein UL133 OS=Human cytomegalovirus OX=10359 GN=UL133 PE=4 SV=1	75	IDVFTCRWVRYCSCSCKCSCK
0.3	A0A0B4N699	tr|A0A0B4N699|A0A0B4N699_CVHOC Spike glycoprotein OS=Human coronavirus OC43 OX=31631 GN=S PE=3 SV=1	1326	CTGCGTSCFKKCGGCCDDYTG
0.3	Q19U49	tr|Q19U49|Q19U49_CVHK1 Spike glycoprotein OS=Human coronavirus HKU1 OX=290028 GN=S PE=3 SV=1	1324	CTGCGSACFSKCHNCCDEYGG
0.3	Q52N55	tr|Q52N55|Q52N55_HCMV UL133 OS=Human cytomegalovirus OX=10359 PE=4 SV=1	75	IDLLTCRWVRYCSCSCKCSCK
0.3	A0A1Y0EV30	tr|A0A1Y0EV30|A0A1Y0EV30_CVH22 Spike protein OS=Human coronavirus 229E OX=11137 GN=S PE=4 SV=1	1133	LCCCSTGCCGFFSCFASSIKG
0.3	Q4VIF0	tr|Q4VIF0|Q4VIF0_CVHOC Spike glycoprotein OS=Human coronavirus OC43 OX=31631 GN=S PE=3 SV=1	1331	CTGCGTSCFKKCGGCCDDYTG
0.3	A0A0B4N711	tr|A0A0B4N711|A0A0B4N711_CVHOC Spike glycoprotein OS=Human coronavirus OC43 OX=31631 GN=S PE=3 SV=1	1326	CTGCGTSCFKKCGGCCDDYTG
0.3	A0A0B4N716	tr|A0A0B4N716|A0A0B4N716_CVHOC Spike glycoprotein OS=Human coronavirus OC43 OX=31631 GN=S PE=3 SV=1	1326	CTGCGTSCFKKCGGCCDDYTG
0.3	A0A1L7H999	tr|A0A1L7H999|A0A1L7H999_CVHOC Spike glycoprotein OS=Human coronavirus OC43 OX=31631 GN=S PE=3 SV=1	1326	CTGCGTSCFKKCGGCCDDYTG
0.3	U3M7L8	tr|U3M7L8|U3M7L8_CVHOC Spike glycoprotein OS=Human coronavirus OC43 OX=31631 GN=S PE=3 SV=1	1324	CTGCGTSCFKKCGGCCDDYTG
0.3	Q5PX03	tr|Q5PX03|Q5PX03_HCMV UL133 OS=Human cytomegalovirus OX=10359 GN=UL133 PE=4 SV=1	76	IDILTCRWVRYCSCSCKCSCK
0.3	A0A0B4N7I3	tr|A0A0B4N7I3|A0A0B4N7I3_CVHOC Spike glycoprotein OS=Human coronavirus OC43 OX=31631 GN=S PE=3 SV=1	1330	CTGCGTSCFKKCGGCCDDYTG
0.3	A0A5B9MUX5	tr|A0A5B9MUX5|A0A5B9MUX5_CVHOC Spike glycoprotein OS=Human coronavirus OC43 OX=31631 GN=S PE=3 SV=1	1326	CTGCGTSCFKKCGGCCDDYTG
0.3	A0A0B4N6J6	tr|A0A0B4N6J6|A0A0B4N6J6_CVHOC Spike glycoprotein OS=Human coronavirus OC43 OX=31631 GN=S PE=3 SV=1	1330	CTGCGTSCFKKCGGCCDDYTG
0.3	A7J8L2	tr|A7J8L2|A7J8L2_SARS 2'-O-methyltransferase OS=Severe acute respiratory syndrome coronavirus OX=694009 GN=PP1ab PE=3 SV=1	3750	GNTLQCIMLVYCFLGYCCCCY
0.3	A0A0G2RD25	tr|A0A0G2RD25|A0A0G2RD25_CVHOC Spike glycoprotein OS=Human coronavirus OC43 OX=31631 GN=S PE=3 SV=1	1330	CTGCGTSCFKKCGGCCDDYTG
0.3	Q4VIE8	tr|Q4VIE8|Q4VIE8_CVHOC Spike glycoprotein OS=Human coronavirus OC43 OX=31631 GN=S PE=3 SV=1	1329	CTGCGTSCFKKCGGCCDDYTG
0.3	U3M7M6	tr|U3M7M6|U3M7M6_CVHOC Spike glycoprotein OS=Human coronavirus OC43 OX=31631 GN=S PE=3 SV=1	1329	CTGCGTSCFKKCGGCCDDYTG
0.3	A0A385H5W2	tr|A0A385H5W2|A0A385H5W2_CVHOC Spike glycoprotein OS=Human coronavirus OC43 OX=31631 GN=S PE=3 SV=1	1330	CTGCGTSCFKKCGGCCDDYTG
0.3	A0A1W6DZR8	tr|A0A1W6DZR8|A0A1W6DZR8_CVHOC Spike glycoprotein OS=Human coronavirus OC43 OX=31631 GN=S PE=3 SV=1	1326	CTGCGTSCFKKCGGCCDDYTG
0.3	A0A2D1QW75	tr|A0A2D1QW75|A0A2D1QW75_CVHOC Spike glycoprotein OS=Human coronavirus OC43 OX=31631 GN=S PE=3 SV=1	1324	CTGCGTSCFKKCGGCCDDYTG
0.3	A0A224AU17	tr|A0A224AU17|A0A224AU17_CVHOC Spike glycoprotein OS=Human coronavirus OC43 OX=31631 GN=S PE=3 SV=1	1326	CTGCGTSCFKKCGGCCDDYTG
0.3	A0A0B4N6L4	tr|A0A0B4N6L4|A0A0B4N6L4_CVHOC Spike glycoprotein OS=Human coronavirus OC43 OX=31631 GN=S PE=3 SV=1	1326	CTGCGTSCFKKCGGCCDDYTG
0.3	A0A291PP17	tr|A0A291PP17|A0A291PP17_HPV18 Probable protein E5 OS=Human papillomavirus type 18 OX=333761 GN=E5 PE=3 SV=1	8	ICFCVCMYVCCHVPLLPSVCM
0.3	Q19U46	tr|Q19U46|Q19U46_CVHK1 Spike glycoprotein OS=Human coronavirus HKU1 OX=290028 GN=S PE=3 SV=1	1319	CTGCGSACFSKCHNCCDEYGG
0.3	E7DVS3	tr|E7DVS3|E7DVS3_HCMV Protein UL133 OS=Human cytomegalovirus OX=10359 GN=UL133 PE=4 SV=1	76	IDLLTCRWVRYCSCSCKCNCK
0.3	Q19U47	tr|Q19U47|Q19U47_CVHK1 Spike glycoprotein OS=Human coronavirus HKU1 OX=290028 GN=S PE=3 SV=1	1324	CTGCGSACFSKCHNCCDEYGG
0.3	Q52N53	tr|Q52N53|Q52N53_HCMV Protein UL133 OS=Human cytomegalovirus OX=10359 GN=UL133 PE=4 SV=1	75	IDLLTCRWVRYCSCSCKCSCK
0.3	D2W9R5	tr|D2W9R5|D2W9R5_HCMV Protein UL133 OS=Human cytomegalovirus OX=10359 GN=UL133 PE=4 SV=1	76	IDILTCRWVRYCSCSCKCSCK
0.3	Q6SWZ1	tr|Q6SWZ1|Q6SWZ1_HCMV Protein UL133 OS=Human cytomegalovirus OX=10359 GN=UL133 PE=4 SV=1	76	IDLLTCRWVRYCSCSCKCSCK
0.3	A0A0G2RCA3	tr|A0A0G2RCA3|A0A0G2RCA3_CVHOC Spike glycoprotein OS=Human coronavirus OC43 OX=31631 GN=S PE=3 SV=1	1326	CTGCGTSCFKKCGGCCDDYTG
0.3	A0A0G2TGV5	tr|A0A0G2TGV5|A0A0G2TGV5_HCMV Protein UL133 OS=Human cytomegalovirus OX=10359 GN=UL133 PE=4 SV=1	75	IDVFTCRWVRYCSCSCKCSCK
0.3	A0A1V0PKZ7	tr|A0A1V0PKZ7|A0A1V0PKZ7_CVHOC Spike glycoprotein OS=Human coronavirus OC43 OX=31631 GN=S PE=3 SV=1	1326	CTGCGTSCFKKCGGCCDDYTG
0.3	A0A1S5VGG0	tr|A0A1S5VGG0|A0A1S5VGG0_CVHOC Spike glycoprotein OS=Human coronavirus OC43 OX=31631 GN=S PE=3 SV=1	1327	CTGCGTSCFKKCGGCCDDYTG
0.3	G5CJB9	tr|G5CJB9|G5CJB9_CVHOC Spike glycoprotein OS=Human coronavirus OC43 OX=31631 GN=S PE=3 SV=1	1329	CTGCGTSCFKKCGGCCDDYTG
0.3	A0A0B4N6Z9	tr|A0A0B4N6Z9|A0A0B4N6Z9_CVHOC Spike glycoprotein OS=Human coronavirus OC43 OX=31631 GN=S PE=3 SV=1	1326	CTGCGTSCFKKCGGCCDDYTG
0.3	A0A0G2U2Q9	tr|A0A0G2U2Q9|A0A0G2U2Q9_HCMV Protein UL133 OS=Human cytomegalovirus OX=10359 GN=UL133 PE=4 SV=1	75	IDVFTCRWVRYCSCSCKCSCK
0.3	Q19U48	tr|Q19U48|Q19U48_CVHK1 Spike glycoprotein OS=Human coronavirus HKU1 OX=290028 GN=S PE=3 SV=1	1324	CTGCGSACFSKCHNCCDEYGG
0.3	A0A140IJ99	tr|A0A140IJ99|A0A140IJ99_HCMV Protein UL133 OS=Human cytomegalovirus OX=10359 GN=UL133 PE=4 SV=1	76	IDLLTCRWVRYCSCSCKCSCK
0.3	A0A0G2TZ94	tr|A0A0G2TZ94|A0A0G2TZ94_HCMV Protein UL133 OS=Human cytomegalovirus OX=10359 GN=UL133 PE=4 SV=1	76	IDVFTCRWVRYCSCSCKCSCK
0.3	A0A5B9MRA3	tr|A0A5B9MRA3|A0A5B9MRA3_CVHOC Spike glycoprotein OS=Human coronavirus OC43 OX=31631 GN=S PE=3 SV=1	1326	CTGCGTSCFKKCGGCCDDYTG
0.3	D3ITX6	tr|D3ITX6|D3ITX6_HPV18 Probable protein E5 OS=Human papillomavirus type 18 OX=333761 GN=E5 PE=3 SV=1	8	FCFCVCLYVCCHVPLLPSVCM
0.3	A9XFI7	tr|A9XFI7|A9XFI7_HPV18 Probable protein E5 OS=Human papillomavirus type 18 OX=333761 GN=E5 PE=3 SV=1	8	FCFCVCLYVCCHVPLLPSVCM
0.3	A0A3G2KXL1	tr|A0A3G2KXL1|A0A3G2KXL1_CVHK1 Spike glycoprotein OS=Human coronavirus HKU1 OX=290028 GN=S PE=3 SV=1	1319	CTGCGSACFSKCHNCCDEYGG
0.3	A0A3S6FHE5	tr|A0A3S6FHE5|A0A3S6FHE5_CVHOC Spike glycoprotein OS=Human coronavirus OC43 OX=31631 GN=S PE=3 SV=1	1326	CTGCGTSCFKKCGGCCDDYTG
0.3	A0A2D1CLQ8	tr|A0A2D1CLQ8|A0A2D1CLQ8_CVHOC Spike glycoprotein OS=Human coronavirus OC43 OX=31631 GN=S PE=3 SV=1	1330	CTGCGTSCFKKCGGCCDDYTG
0.3	T2A669	tr|T2A669|T2A669_HPV18 Probable protein E5 OS=Human papillomavirus type 18 OX=333761 GN=E5 PE=3 SV=1	8	FCVCVCLYVCCHVPLLPSVCM
0.3	A0A0G2T9G0	tr|A0A0G2T9G0|A0A0G2T9G0_HCMV Protein UL133 OS=Human cytomegalovirus OX=10359 GN=UL133 PE=4 SV=1	75	IDVFTCRWVRYCSCSCKCSCK
0.3	A0A1V0PL04	tr|A0A1V0PL04|A0A1V0PL04_CVHOC Spike glycoprotein OS=Human coronavirus OC43 OX=31631 GN=S PE=3 SV=1	1326	CTGCGTSCFKKCGGCCDDYTG
0.3	A0A0K0L8I8	tr|A0A0K0L8I8|A0A0K0L8I8_CVHOC Spike glycoprotein OS=Human coronavirus OC43 OX=31631 GN=S PE=3 SV=1	1329	CTGCGTSCFKKCGGCCDDYTG
0.3	A0A2L2QE53	tr|A0A2L2QE53|A0A2L2QE53_HHV6H Uncharacterized protein OS=Human herpesvirus 6B OX=32604 PE=4 SV=1	17	VCIFLCVFFCVCIFLCVFFCV
0.3	Q0ZJH3	tr|Q0ZJH3|Q0ZJH3_CVHK1 Spike glycoprotein OS=Human coronavirus HKU1 OX=290028 GN=S PE=3 SV=1	1324	CTGCGSACFSKCHNCCDEYGG
0.3	U3M6Y8	tr|U3M6Y8|U3M6Y8_CVHOC Spike glycoprotein OS=Human coronavirus OC43 OX=31631 GN=S PE=3 SV=1	1329	CTGCGTSCFKKCGGCCDDYTG
0.3	U3M6Z7	tr|U3M6Z7|U3M6Z7_CVHOC Spike glycoprotein OS=Human coronavirus OC43 OX=31631 GN=S PE=3 SV=1	1329	CTGCGTSCFKKCGGCCDDYTG
0.3	U3M6V9	tr|U3M6V9|U3M6V9_CVHOC Spike glycoprotein OS=Human coronavirus OC43 OX=31631 GN=S PE=3 SV=1	1324	CTGCGTSCFKKCGGCCDDYTG
0.3	U3M712	tr|U3M712|U3M712_CVHOC Spike glycoprotein OS=Human coronavirus OC43 OX=31631 GN=S PE=3 SV=1	1324	CTGCGTSCFKKCGGCCDDYTG
0.3	D2K5M9	tr|D2K5M9|D2K5M9_HCMV Protein UL133 OS=Human cytomegalovirus OX=10359 GN=UL133 PE=4 SV=1	76	IDLLTCRWVRYCSCSCKCSCK
0.3	A0A2Z4HFQ2	tr|A0A2Z4HFQ2|A0A2Z4HFQ2_CVHOC Spike glycoprotein OS=Human coronavirus OC43 OX=31631 GN=S PE=3 SV=1	1327	CTGCGTSCFKKCGGCCDDYTG
0.3	A0A1W6E033	tr|A0A1W6E033|A0A1W6E033_CVHOC Spike glycoprotein OS=Human coronavirus OC43 OX=31631 GN=S PE=3 SV=1	1326	CTGCGTSCFKKCGGCCDDYTG
0.3	A0A0B4N702	tr|A0A0B4N702|A0A0B4N702_CVHOC Spike glycoprotein OS=Human coronavirus OC43 OX=31631 GN=S PE=3 SV=1	1326	CTGCGTSCFKKCGGCCDDYTG
0.3	A0A1S5VGC7	tr|A0A1S5VGC7|A0A1S5VGC7_CVHOC Spike glycoprotein OS=Human coronavirus OC43 OX=31631 GN=S PE=3 SV=1	1326	CTGCGTSCFKKCGGCCDDYTG
0.3	A0A2Z4HFJ9	tr|A0A2Z4HFJ9|A0A2Z4HFJ9_CVHOC Spike glycoprotein OS=Human coronavirus OC43 OX=31631 GN=S PE=3 SV=1	1334	CTGCGTSCFKKCGGCCDDYTG
0.3	A0A482KC70	tr|A0A482KC70|A0A482KC70_CVHOC Spike glycoprotein OS=Human coronavirus OC43 OX=31631 GN=S PE=3 SV=1	1330	CTGCGTSCFKKCGGCCDDYTG
0.3	L7X1E0	tr|L7X1E0|L7X1E0_HCMV UL133 OS=Human cytomegalovirus OX=10359 GN=UL133 PE=4 SV=1	76	IDLLTCRWVRYCSCSCKCSCK
0.3	A0A0B4N611	tr|A0A0B4N611|A0A0B4N611_CVHOC Spike glycoprotein OS=Human coronavirus OC43 OX=31631 GN=S PE=3 SV=1	1326	CTGCGTSCFKKCGGCCDDYTG
0.3	A0A0B4N7J3	tr|A0A0B4N7J3|A0A0B4N7J3_CVHOC Spike glycoprotein OS=Human coronavirus OC43 OX=31631 GN=S PE=3 SV=1	1326	CTGCGTSCFKKCGGCCDDYTG
0.3	A0A5B9MUZ1	tr|A0A5B9MUZ1|A0A5B9MUZ1_CVHOC Spike glycoprotein OS=Human coronavirus OC43 OX=31631 GN=S PE=3 SV=1	1326	CTGCGTSCFKKCGGCCDDYTG
0.3	U3M7Q6	tr|U3M7Q6|U3M7Q6_CVHOC Spike glycoprotein OS=Human coronavirus OC43 OX=31631 GN=S PE=3 SV=1	1329	CTGCGTSCFKKCGGCCDDYTG
0.3	A7J8L3	tr|A7J8L3|A7J8L3_SARS 3C-like proteinase OS=Severe acute respiratory syndrome coronavirus OX=694009 GN=PP1a PE=3 SV=1	3750	GNTLQCIMLVYCFLGYCCCCY
0.3	A0A1I9XCI0	tr|A0A1I9XCI0|A0A1I9XCI0_HCMV Protein UL133 OS=Human cytomegalovirus OX=10359 GN=UL133 PE=4 SV=1	76	IDLLTCRWVRYCSCSCKCSCK
0.3	A0A1V0E0Z3	tr|A0A1V0E0Z3|A0A1V0E0Z3_CVHOC Spike glycoprotein OS=Human coronavirus OC43 OX=31631 GN=S PE=3 SV=1	1326	CTGCGTSCFKKCGGCCDDYTG
0.3	A0A0B4N687	tr|A0A0B4N687|A0A0B4N687_CVHOC Spike glycoprotein OS=Human coronavirus OC43 OX=31631 GN=S PE=3 SV=1	1330	CTGCGTSCFKKCGGCCDDYTG
0.3	A0A0G2RC97	tr|A0A0G2RC97|A0A0G2RC97_CVHOC Spike glycoprotein OS=Human coronavirus OC43 OX=31631 GN=S PE=3 SV=1	1324	CTGCGTSCFKKCGGCCDDYTG
0.3	A0A0B4N6M3	tr|A0A0B4N6M3|A0A0B4N6M3_CVHOC Spike glycoprotein OS=Human coronavirus OC43 OX=31631 GN=S PE=3 SV=1	1326	CTGCGTSCFKKCGGCCDDYTG
0.3	L7WVZ7	tr|L7WVZ7|L7WVZ7_HCMV Protein UL133 OS=Human cytomegalovirus OX=10359 GN=UL133 PE=4 SV=1	76	IDLLTCRWVRYCSCSCKCSCK
0.3	D2W9J3	tr|D2W9J3|D2W9J3_HCMV Protein UL133 OS=Human cytomegalovirus OX=10359 GN=UL133 PE=4 SV=1	76	IDLLTCRWVRYCSCSCKCSCK
0.3	R4SHX7	tr|R4SHX7|R4SHX7_HCMV Protein UL133 OS=Human cytomegalovirus OX=10359 GN=UL133 PE=4 SV=1	76	IDILTCRWVRYCSCSCKCSCK
0.3	Q6SWT4	tr|Q6SWT4|Q6SWT4_HCMV Protein UL133 OS=Human cytomegalovirus OX=10359 GN=UL133 PE=4 SV=1	75	IDVFTCRWVRYCSCSCKCSCK
0.3	U3M7N6	tr|U3M7N6|U3M7N6_CVHOC Spike glycoprotein OS=Human coronavirus OC43 OX=31631 GN=S PE=3 SV=1	1329	CTGCGTSCFKKCGGCCDDYTG
0.3	A0A0G2U5F8	tr|A0A0G2U5F8|A0A0G2U5F8_HCMV Protein UL133 OS=Human cytomegalovirus OX=10359 GN=UL133 PE=4 SV=1	76	IDILTCRWVRYCSCSCKCSCK
0.3	Q52N51	tr|Q52N51|Q52N51_HCMV UL133 OS=Human cytomegalovirus OX=10359 PE=4 SV=1	75	IDLLTCRWVRYCSCSCKCSCK
0.3	A0A0G2TI40	tr|A0A0G2TI40|A0A0G2TI40_HCMV Protein UL133 OS=Human cytomegalovirus OX=10359 GN=UL133 PE=4 SV=1	76	IDILTCRWVRYCSCSCKCSCK
0.3	U3M7P4	tr|U3M7P4|U3M7P4_CVHOC Spike glycoprotein OS=Human coronavirus OC43 OX=31631 GN=S PE=3 SV=1	1324	CTGCGTSCFKKCGGCCDDYTG
0.3	A0A0G2RC93	tr|A0A0G2RC93|A0A0G2RC93_CVHOC Spike glycoprotein OS=Human coronavirus OC43 OX=31631 GN=S PE=3 SV=1	1330	CTGCGTSCFKKCGGCCDDYTG
0.3	D2W9W3	tr|D2W9W3|D2W9W3_HCMV Protein UL133 OS=Human cytomegalovirus OX=10359 GN=UL133 PE=4 SV=1	76	IDLLTCRWVRYCSCSCKCSCK
0.3	A0A384QXM1	tr|A0A384QXM1|A0A384QXM1_CVH22 Spike glycoprotein OS=Human coronavirus 229E OX=11137 GN=S PE=4 SV=1	1133	LCCCSTGCCGFFSCFASSIRG
0.3	A0A2R3TWV1	tr|A0A2R3TWV1|A0A2R3TWV1_CVHOC Spike glycoprotein OS=Human coronavirus OC43 OX=31631 GN=S PE=3 SV=1	1330	CTGCGTSCFKKCGGCCDDYTG
0.3	A0A5B9MU27	tr|A0A5B9MU27|A0A5B9MU27_CVHOC Spike glycoprotein OS=Human coronavirus OC43 OX=31631 GN=S PE=3 SV=1	1326	CTGCGTSCFKKCGGCCDDYTG
0.3	A0A0B4N6K0	tr|A0A0B4N6K0|A0A0B4N6K0_CVHOC Spike glycoprotein OS=Human coronavirus OC43 OX=31631 GN=S PE=3 SV=1	1326	CTGCGTSCFKKCGGCCDDYTG
0.3	U3M7N2	tr|U3M7N2|U3M7N2_CVHOC Spike glycoprotein OS=Human coronavirus OC43 OX=31631 GN=S PE=3 SV=1	1324	CTGCGTSCFKKCGGCCDDYTG
0.3	A0A513ZT10	tr|A0A513ZT10|A0A513ZT10_CVHOC Spike glycoprotein OS=Human coronavirus OC43 OX=31631 GN=S PE=3 SV=1	1326	CTGCGTSCFKKCGGCCDDYTG
0.3	A0A0G2RD21	tr|A0A0G2RD21|A0A0G2RD21_CVHOC Spike glycoprotein OS=Human coronavirus OC43 OX=31631 GN=S PE=3 SV=1	1324	CTGCGTSCFKKCGGCCDDYTG
0.3	U3M6B2	tr|U3M6B2|U3M6B2_CVHOC Spike glycoprotein OS=Human coronavirus OC43 OX=31631 GN=S PE=3 SV=1	1324	CTGCGTSCFKKCGGCCDDYTG
0.3	A0A1L7B908	tr|A0A1L7B908|A0A1L7B908_CVH22 S OS=Human coronavirus 229E OX=11137 PE=4 SV=1	1133	LCCCSTGCCGFFSCFASSIKG
0.3	A0A3S6FHI0	tr|A0A3S6FHI0|A0A3S6FHI0_CVHOC Spike glycoprotein OS=Human coronavirus OC43 OX=31631 GN=S PE=3 SV=1	1326	CTGCGTSCFKKCGGCCDDYTG
0.3	A0A3S6FHK6	tr|A0A3S6FHK6|A0A3S6FHK6_CVHOC Spike glycoprotein OS=Human coronavirus OC43 OX=31631 GN=S PE=3 SV=1	1326	CTGCGTSCFKKCGGCCDDYTG
0.3	Q76Z94	tr|Q76Z94|Q76Z94_HPV18 Probable protein E5 OS=Human papillomavirus type 18 OX=333761 GN=E5 PE=3 SV=1	8	FCFCVCMYVCCHVPLLPSVCM
0.3	A0A0G2T9R0	tr|A0A0G2T9R0|A0A0G2T9R0_HCMV Protein UL133 OS=Human cytomegalovirus OX=10359 GN=UL133 PE=4 SV=1	76	IDLLTCRWVRHCSCSCKCSCK
0.3	A0A0G2TYA1	tr|A0A0G2TYA1|A0A0G2TYA1_HCMV Protein UL133 OS=Human cytomegalovirus OX=10359 GN=UL133 PE=4 SV=1	76	IDLLTCRWVRYCSCSCKCSCK
0.3	A0A140H1H1	tr|A0A140H1H1|A0A140H1H1_CVHK1 Spike glycoprotein OS=Human coronavirus HKU1 OX=290028 GN=S PE=3 SV=1	1324	CTGCGSACFSKCHNCCDEYGG
0.3	A0A3S6FHL4	tr|A0A3S6FHL4|A0A3S6FHL4_CVHOC Spike glycoprotein OS=Human coronavirus OC43 OX=31631 GN=S PE=3 SV=1	1326	CTGCGTSCFKKCGGCCDDYTG
0.3	A0A0G2RCC7	tr|A0A0G2RCC7|A0A0G2RCC7_CVHOC Spike glycoprotein OS=Human coronavirus OC43 OX=31631 GN=S PE=3 SV=1	1324	CTGCGTSCFKKCGGCCDDYTG
0.3	A0A0G2RC89	tr|A0A0G2RC89|A0A0G2RC89_CVHOC Spike glycoprotein OS=Human coronavirus OC43 OX=31631 GN=S PE=3 SV=1	1331	CTGCGTSCFKKCGGCCDDYTG
0.3	A0A224AU30	tr|A0A224AU30|A0A224AU30_CVHOC Spike glycoprotein OS=Human coronavirus OC43 OX=31631 GN=S PE=3 SV=1	1330	CTGCGTSCFKKCGGCCDDYTG
0.3	A0A0K0L9E5	tr|A0A0K0L9E5|A0A0K0L9E5_CVHOC Spike glycoprotein OS=Human coronavirus OC43 OX=31631 GN=S PE=3 SV=1	1326	CTGCGTSCFKKCGGCCDDYTG
0.3	Q6SWW2	tr|Q6SWW2|Q6SWW2_HCMV Protein UL133 OS=Human cytomegalovirus OX=10359 GN=UL133 PE=4 SV=1	75	IDVFTCRWVRYCSCSCKCSCK
0.3	Q19U42	tr|Q19U42|Q19U42_CVHK1 Spike glycoprotein OS=Human coronavirus HKU1 OX=290028 GN=S PE=3 SV=1	1324	CTGCGSACFSKCHNCCDEYGG
0.3	A0A2Z4HFS2	tr|A0A2Z4HFS2|A0A2Z4HFS2_CVHOC Spike protein OS=Human coronavirus OC43 OX=31631 GN=S PE=4 SV=1	1334	CTGCGTSCFKKCGGCCDDYTG
0.3	Q6SWQ6	tr|Q6SWQ6|Q6SWQ6_HCMV Protein UL133 OS=Human cytomegalovirus OX=10359 GN=UL133 PE=4 SV=1	76	IDILTCRWVRYCSCSCKCSCK
0.3	U3M716	tr|U3M716|U3M716_CVHOC Spike glycoprotein OS=Human coronavirus OC43 OX=31631 GN=S PE=3 SV=1	1324	CTGCGTSCFKKCGGCCDDYTG
0.3	A0A0B4N6B2	tr|A0A0B4N6B2|A0A0B4N6B2_CVHOC Spike glycoprotein OS=Human coronavirus OC43 OX=31631 GN=S PE=3 SV=1	1326	CTGCGTSCFKKCGGCCDDYTG
0.3	A0A0G2RCA9	tr|A0A0G2RCA9|A0A0G2RCA9_CVHOC Spike glycoprotein OS=Human coronavirus OC43 OX=31631 GN=S PE=3 SV=1	1330	CTGCGTSCFKKCGGCCDDYTG
0.3	A0A0K0KPM4	tr|A0A0K0KPM4|A0A0K0KPM4_CVHOC Spike glycoprotein OS=Human coronavirus OC43 OX=31631 GN=S PE=3 SV=1	1329	CTGCGTSCFKKCGGCCDDYTG
0.3	A0A0B4N6B6	tr|A0A0B4N6B6|A0A0B4N6B6_CVHOC Spike glycoprotein OS=Human coronavirus OC43 OX=31631 GN=S PE=3 SV=1	1326	CTGCGTSCFKKCGGCCDDYTG
0.3	A0A0B4Q9M3	tr|A0A0B4Q9M3|A0A0B4Q9M3_CVHOC Spike glycoprotein OS=Human coronavirus OC43 OX=31631 GN=S PE=3 SV=1	1330	CTGCGTSCFKKCGGCCDDYTG
0.3	U3NAI2	tr|U3NAI2|U3NAI2_CVHK1 Spike glycoprotein OS=Human coronavirus HKU1 OX=290028 GN=S PE=3 SV=1	1324	CTGCGSACFSKCHNCCDEYGG
0.3	A0A224AU27	tr|A0A224AU27|A0A224AU27_CVHK1 Spike glycoprotein OS=Human coronavirus HKU1 OX=290028 GN=S PE=3 SV=1	1324	CTGCGSACFSKCHNCCDEYGG
0.3	A0A0B4N5X3	tr|A0A0B4N5X3|A0A0B4N5X3_CVHOC Spike glycoprotein OS=Human coronavirus OC43 OX=31631 GN=S PE=3 SV=1	1328	CTGCGTSCFKKCGGCCDDYTG
0.3	A0A482KES2	tr|A0A482KES2|A0A482KES2_CVHOC Spike glycoprotein OS=Human coronavirus OC43 OX=31631 GN=S PE=3 SV=1	1326	CTGCGTSCFKKCGGCCDDYTG
0.3	A0A0G2TUJ3	tr|A0A0G2TUJ3|A0A0G2TUJ3_HCMV Protein UL133 OS=Human cytomegalovirus OX=10359 GN=UL133 PE=4 SV=1	76	IDILTCRWVRYCSCSCKCSCK
0.3	A0A140H1H9	tr|A0A140H1H9|A0A140H1H9_CVHK1 Spike glycoprotein OS=Human coronavirus HKU1 OX=290028 GN=S PE=3 SV=1	1324	CTGCGSACFSKCHNCCDEYGG
0.3	S5YA28	tr|S5YA28|S5YA28_CVHK1 Spike glycoprotein OS=Human coronavirus HKU1 OX=290028 GN=S PE=3 SV=1	1323	CTGCGSACFSKCHNCCDEYGG
0.3	A0A1L7H9A4	tr|A0A1L7H9A4|A0A1L7H9A4_CVHOC Spike glycoprotein OS=Human coronavirus OC43 OX=31631 GN=S PE=3 SV=1	1326	CTGCGTSCFKKCGGCCDDYTG
0.3	A0A0B4N6K8	tr|A0A0B4N6K8|A0A0B4N6K8_CVHOC Spike glycoprotein OS=Human coronavirus OC43 OX=31631 GN=S PE=3 SV=1	1326	CTGCGTSCFKKCGGCCDDYTG
0.3	A0A1L7B934	tr|A0A1L7B934|A0A1L7B934_CVH22 S OS=Human coronavirus 229E OX=11137 PE=4 SV=1	1133	LCCCSTGCCGFFSCFASSIKG
0.3	A0A3S6FJG2	tr|A0A3S6FJG2|A0A3S6FJG2_CVHOC Spike glycoprotein OS=Human coronavirus OC43 OX=31631 GN=S PE=3 SV=1	1332	CTGCGTSCFKKCGGCCDDYTG
0.3	A0A224ANC9	tr|A0A224ANC9|A0A224ANC9_CVHK1 Spike glycoprotein OS=Human coronavirus HKU1 OX=290028 GN=S PE=3 SV=1	1320	CTGCGSACFSKCHNCCDEYGG
0.3	D2K4P9	tr|D2K4P9|D2K4P9_HCMV Protein UL133 OS=Human cytomegalovirus OX=10359 GN=UL133 PE=4 SV=1	76	IDLLTCRWVRYCSCSCKCSCK
0.3	A0A5B9MRW3	tr|A0A5B9MRW3|A0A5B9MRW3_CVHOC Spike glycoprotein OS=Human coronavirus OC43 OX=31631 GN=S PE=3 SV=1	1330	CTGCGTSCFKKCGGCCDDYTG
0.3	J9T4N3	tr|J9T4N3|J9T4N3_SARS 2'-O-methyltransferase OS=Severe acute respiratory syndrome coronavirus OX=694009 GN=PP1ab PE=3 SV=1	3750	GNTLQCIMLVYCFLGYCCCCY
0.3	A0A0G2TQ86	tr|A0A0G2TQ86|A0A0G2TQ86_HCMV Protein UL133 OS=Human cytomegalovirus OX=10359 GN=UL133 PE=4 SV=1	76	IDLLTCRWVRHCSCSCKCSCK
0.3	A0A0B4Q7Z0	tr|A0A0B4Q7Z0|A0A0B4Q7Z0_CVHOC Spike glycoprotein OS=Human coronavirus OC43 OX=31631 GN=S PE=3 SV=1	1330	CTGCGTSCFKKCGGCCDDYTG
0.3	A0A0B4N5Y2	tr|A0A0B4N5Y2|A0A0B4N5Y2_CVHOC Spike glycoprotein OS=Human coronavirus OC43 OX=31631 GN=S PE=3 SV=1	1326	CTGCGTSCFKKCGGCCDDYTG
0.3	Q1HVM1	tr|Q1HVM1|Q1HVM1_CVH22 Spike glycoprotein OS=Human coronavirus 229E OX=11137 GN=S PE=3 SV=1	1132	LCCCSTGCCGFFSCFASSIRG
0.3	U3M7Q4	tr|U3M7Q4|U3M7Q4_CVHOC Spike glycoprotein OS=Human coronavirus OC43 OX=31631 GN=S PE=3 SV=1	1329	CTGCGTSCFKKCGGCCDDYTG
0.3	A0A0B4N6J3	tr|A0A0B4N6J3|A0A0B4N6J3_CVHOC Spike glycoprotein OS=Human coronavirus OC43 OX=31631 GN=S PE=3 SV=1	1330	CTGCGTSCFKKCGGCCDDYTG
0.3	A0A385H6T1	tr|A0A385H6T1|A0A385H6T1_CVHOC Spike glycoprotein OS=Human coronavirus OC43 OX=31631 GN=S PE=3 SV=1	1330	CTGCGTSCFKKCGGCCDDYTG
0.3	A0A2P1ZWW8	tr|A0A2P1ZWW8|A0A2P1ZWW8_CVHOC Spike glycoprotein OS=Human coronavirus OC43 OX=31631 GN=S PE=3 SV=1	1328	CTGCGTSCFKKCGGCCDDYTG
0.3	U3M7M0	tr|U3M7M0|U3M7M0_CVHOC Spike glycoprotein OS=Human coronavirus OC43 OX=31631 GN=S PE=3 SV=1	1329	CTGCGTSCFKKCGGCCDDYTG
0.3	A0A2Z4HFP0	tr|A0A2Z4HFP0|A0A2Z4HFP0_CVHOC Spike glycoprotein OS=Human coronavirus OC43 OX=31631 GN=S PE=3 SV=1	1327	CTGCGTSCFKKCGGCCDDYTG
0.3	Q5PX11	tr|Q5PX11|Q5PX11_HCMV UL133 OS=Human cytomegalovirus OX=10359 PE=4 SV=1	76	IDVFTCRWVRYCSCSCKCSCK
0.3	Q19U45	tr|Q19U45|Q19U45_CVHK1 Spike glycoprotein OS=Human coronavirus HKU1 OX=290028 GN=S PE=3 SV=1	1319	CTGCGSACFSKCHNCCDEYGG
0.3	V9PUT1	tr|V9PUT1|V9PUT1_HCMV Protein UL133 OS=Human cytomegalovirus OX=10359 GN=UL133 PE=4 SV=1	76	IDILTCRWVRYCSCSCKCSCK
0.3	U3M704	tr|U3M704|U3M704_CVHOC Spike glycoprotein OS=Human coronavirus OC43 OX=31631 GN=S PE=3 SV=1	1328	CTGCGTSCFKKCGGCCDDYTG
0.3	Q5PX06	tr|Q5PX06|Q5PX06_HCMV UL133 OS=Human cytomegalovirus OX=10359 PE=4 SV=1	76	IDVFTCRWVRYCSCSCKCSCK
0.3	A0A1Y0EUZ8	tr|A0A1Y0EUZ8|A0A1Y0EUZ8_CVHK1 Spike glycoprotein OS=Human coronavirus HKU1 OX=290028 GN=S PE=3 SV=1	1324	CTGCGSACFSKCHNCCDEYGG
0.3	A0A0K0L9K1	tr|A0A0K0L9K1|A0A0K0L9K1_CVHOC Spike glycoprotein OS=Human coronavirus OC43 OX=31631 GN=S PE=3 SV=1	1326	CTGCGTSCFKKCGGCCDDYTG
0.3	A0A482KBY9	tr|A0A482KBY9|A0A482KBY9_CVHOC Spike glycoprotein OS=Human coronavirus OC43 OX=31631 GN=S PE=3 SV=1	1326	CTGCGTSCFKKCGGCCDDYTG
0.3	Q4VIE4	tr|Q4VIE4|Q4VIE4_CVHOC Spike glycoprotein OS=Human coronavirus OC43 OX=31631 GN=S PE=3 SV=1	1331	CTGCGTSCFKKCGGCCDDYTG
0.3	A0A0G2UAQ3	tr|A0A0G2UAQ3|A0A0G2UAQ3_HCMV Protein UL133 OS=Human cytomegalovirus OX=10359 GN=UL133 PE=4 SV=1	76	IDVFTCRWVRYCSCSCKCSCK
0.3	C8BLL0	tr|C8BLL0|C8BLL0_HCMV Protein UL133 OS=Human cytomegalovirus OX=10359 GN=UL133 PE=4 SV=1	76	IDILTCRWVRYCSCSCKCSCK
0.3	V9LNI1	tr|V9LNI1|V9LNI1_HCMV Protein UL133 OS=Human cytomegalovirus OX=10359 GN=UL133 PE=4 SV=1	76	IDLLTCRWVRHCSCSCKCSCK
0.3	A0A0G2U078	tr|A0A0G2U078|A0A0G2U078_HCMV Protein UL133 OS=Human cytomegalovirus OX=10359 GN=UL133 PE=4 SV=1	76	IDLLTCRWVRYCSCSCKCSCK
0.3	A0A1S5VGE0	tr|A0A1S5VGE0|A0A1S5VGE0_CVHOC Spike glycoprotein OS=Human coronavirus OC43 OX=31631 GN=S PE=3 SV=1	1327	CTGCGTSCFKKCGGCCDDYTG
0.3	A0A451ERM8	tr|A0A451ERM8|A0A451ERM8_CVHK1 Spike glycoprotein OS=Human coronavirus HKU1 OX=290028 GN=S PE=3 SV=1	1319	CTGCGSACFSKCHNCCDEYGG
0.3	U3M7L6	tr|U3M7L6|U3M7L6_CVHOC Spike glycoprotein OS=Human coronavirus OC43 OX=31631 GN=S PE=3 SV=1	1329	CTGCGTSCFKKCGGCCDDYTG
0.3	Q0ZJI1	tr|Q0ZJI1|Q0ZJI1_CVHK1 Spike glycoprotein OS=Human coronavirus HKU1 OX=290028 GN=S PE=3 SV=1	1319	CTGCGSACFSKCHNCCDEYGG
0.3	A0A1W6DZU1	tr|A0A1W6DZU1|A0A1W6DZU1_CVHOC Spike glycoprotein OS=Human coronavirus OC43 OX=31631 GN=S PE=3 SV=1	1326	CTGCGTSCFKKCGGCCDDYTG
0.3	A0A0B4N6A6	tr|A0A0B4N6A6|A0A0B4N6A6_CVHOC Spike glycoprotein OS=Human coronavirus OC43 OX=31631 GN=S PE=3 SV=1	1326	CTGCGTSCFKKCGGCCDDYTG
0.3	A0A385H5S2	tr|A0A385H5S2|A0A385H5S2_CVHOC Spike glycoprotein OS=Human coronavirus OC43 OX=31631 GN=S PE=3 SV=1	1326	CTGCGTSCFKKCGGCCDDYTG
0.3	A0A1S5VGI8	tr|A0A1S5VGI8|A0A1S5VGI8_CVHOC Spike glycoprotein OS=Human coronavirus OC43 OX=31631 GN=S PE=3 SV=1	1327	CTGCGTSCFKKCGGCCDDYTG
0.3	A0A0A0YL58	tr|A0A0A0YL58|A0A0A0YL58_CVHOC Spike glycoprotein OS=Human coronavirus OC43 OX=31631 GN=S PE=3 SV=1	1326	CTGCGTSCFKKCGGCCDDYTG
0.3	U3N885	tr|U3N885|U3N885_CVHK1 Spike glycoprotein OS=Human coronavirus HKU1 OX=290028 GN=S PE=3 SV=1	1324	CTGCGSACFSKCHNCCDEYGG
0.3	A0A513ZT20	tr|A0A513ZT20|A0A513ZT20_CVHOC Spike glycoprotein OS=Human coronavirus OC43 OX=31631 GN=S PE=3 SV=1	1329	CTGCGTSCFKKCGGCCDDYTG
0.3	A0A224AUD8	tr|A0A224AUD8|A0A224AUD8_CVHOC Spike glycoprotein OS=Human coronavirus OC43 OX=31631 GN=S PE=3 SV=1	1326	CTGCGTSCFKKCGGCCDDYTG
0.3	A0A3S6FIX9	tr|A0A3S6FIX9|A0A3S6FIX9_CVHOC Spike glycoprotein OS=Human coronavirus OC43 OX=31631 GN=S PE=3 SV=1	1330	CTGCGTSCFKKCGGCCDDYTG
0.3	A0A0G2RCB2	tr|A0A0G2RCB2|A0A0G2RCB2_CVHOC Spike glycoprotein OS=Human coronavirus OC43 OX=31631 GN=S PE=3 SV=1	1326	CTGCGTSCFKKCGGCCDDYTG
0.3	U3M6W6	tr|U3M6W6|U3M6W6_CVHOC Spike glycoprotein OS=Human coronavirus OC43 OX=31631 GN=S PE=3 SV=1	1329	CTGCGTSCFKKCGGCCDDYTG
0.3	A0A0G2RD16	tr|A0A0G2RD16|A0A0G2RD16_CVHOC Spike glycoprotein OS=Human coronavirus OC43 OX=31631 GN=S PE=3 SV=1	1329	CTGCGTSCFKKCGGCCDDYTG
0.3	A0A0G2RCD5	tr|A0A0G2RCD5|A0A0G2RCD5_CVHOC Spike glycoprotein OS=Human coronavirus OC43 OX=31631 GN=S PE=3 SV=1	1326	CTGCGTSCFKKCGGCCDDYTG
0.3	A0A385H631	tr|A0A385H631|A0A385H631_CVHOC Spike glycoprotein OS=Human coronavirus OC43 OX=31631 GN=S PE=3 SV=1	1326	CTGCGTSCFKKCGGCCDDYTG
0.3	U3M6Z3	tr|U3M6Z3|U3M6Z3_CVHOC Spike glycoprotein OS=Human coronavirus OC43 OX=31631 GN=S PE=3 SV=1	1329	CTGCGTSCFKKCGGCCDDYTG
0.3	A0A5B9MU35	tr|A0A5B9MU35|A0A5B9MU35_CVHOC Spike glycoprotein OS=Human coronavirus OC43 OX=31631 GN=S PE=3 SV=1	1326	CTGCGTSCFKKCGGCCDDYTG
0.3	A0A2Z4HFJ2	tr|A0A2Z4HFJ2|A0A2Z4HFJ2_CVHOC Spike glycoprotein OS=Human coronavirus OC43 OX=31631 GN=S PE=3 SV=1	1327	CTGCGTSCFKKCGGCCDDYTG
0.3	U3M6B6	tr|U3M6B6|U3M6B6_CVHOC Spike glycoprotein OS=Human coronavirus OC43 OX=31631 GN=S PE=3 SV=1	1324	CTGCGTSCFKKCGGCCDDYTG
0.3	A0A0G2RCA7	tr|A0A0G2RCA7|A0A0G2RCA7_CVHOC Spike glycoprotein OS=Human coronavirus OC43 OX=31631 GN=S PE=3 SV=1	1329	CTGCGTSCFKKCGGCCDDYTG
0.3	A0A0K0KPR8	tr|A0A0K0KPR8|A0A0K0KPR8_CVHOC Spike glycoprotein OS=Human coronavirus OC43 OX=31631 GN=S PE=3 SV=1	1326	CTGCGTSCFKKCGGCCDDYTG
0.3	A0A3S6FH27	tr|A0A3S6FH27|A0A3S6FH27_CVHOC Spike glycoprotein OS=Human coronavirus OC43 OX=31631 GN=S PE=3 SV=1	1326	CTGCGTSCFKKCGGCCDDYTG
0.3	A0A1S5VGK6	tr|A0A1S5VGK6|A0A1S5VGK6_CVHOC Spike glycoprotein OS=Human coronavirus OC43 OX=31631 GN=S PE=3 SV=1	1326	CTGCGTSCFKKCGGCCDDYTG
0.3	A0A0K0L9B0	tr|A0A0K0L9B0|A0A0K0L9B0_CVHOC Spike glycoprotein OS=Human coronavirus OC43 OX=31631 GN=S PE=3 SV=1	1332	CTGCGTSCFKKCGGCCDDYTG
0.3	A0A3S6FHR2	tr|A0A3S6FHR2|A0A3S6FHR2_CVHOC Spike glycoprotein OS=Human coronavirus OC43 OX=31631 GN=S PE=3 SV=1	1326	CTGCGTSCFKKCGGCCDDYTG
0.3	S5ZBP3	tr|S5ZBP3|S5ZBP3_CVHK1 Spike glycoprotein OS=Human coronavirus HKU1 OX=290028 GN=S PE=3 SV=1	1320	CTGCGSACFSKCHNCCDEYGG
0.3	U3N9S7	tr|U3N9S7|U3N9S7_CVHK1 Spike glycoprotein OS=Human coronavirus HKU1 OX=290028 GN=S PE=3 SV=1	1324	CTGCGSACFSKCHNCCDEYGG
0.3	G5CJB1	tr|G5CJB1|G5CJB1_CVHOC Spike glycoprotein OS=Human coronavirus OC43 OX=31631 GN=S PE=3 SV=1	1329	CTGCGTSCFKKCGGCCDDYTG
0.3	Q696P8	tr|Q696P8|Q696P8_CVHOC Spike glycoprotein OS=Human coronavirus OC43 OX=31631 GN=S PE=1 SV=1	1321	CTGCGTSCFKKCGGCCDDYTG
0.3	A0A385H6H8	tr|A0A385H6H8|A0A385H6H8_CVHOC Spike glycoprotein OS=Human coronavirus OC43 OX=31631 GN=S PE=3 SV=1	1330	CTGCGPSCFKKCGGCCDDYTG
0.3	A0A0B4N5Z0	tr|A0A0B4N5Z0|A0A0B4N5Z0_CVHOC Spike glycoprotein OS=Human coronavirus OC43 OX=31631 GN=S PE=3 SV=1	1326	CTGCGTSCFKKCGGCCDDYTG
0.3	U3M7L4	tr|U3M7L4|U3M7L4_CVHOC Spike glycoprotein OS=Human coronavirus OC43 OX=31631 GN=S PE=3 SV=1	1324	CTGCGTSCFKKCGGCCDDYTG
0.3	A0A1S5VGA9	tr|A0A1S5VGA9|A0A1S5VGA9_CVHOC Spike glycoprotein OS=Human coronavirus OC43 OX=31631 GN=S PE=3 SV=1	1327	CTGCGTSCFKKCGGCCDDYTG
0.3	A0A385H6F5	tr|A0A385H6F5|A0A385H6F5_CVHOC Spike glycoprotein OS=Human coronavirus OC43 OX=31631 GN=S PE=3 SV=1	1326	CTGCGTSCFKKCGGCCDDYTG
0.3	A0A1C8Z4S1	tr|A0A1C8Z4S1|A0A1C8Z4S1_CVHOC Spike glycoprotein OS=Human coronavirus OC43 OX=31631 GN=S PE=3 SV=1	1326	CTGCGTSCFKKCGGCCDDYTG
0.3	A0A482KB25	tr|A0A482KB25|A0A482KB25_CVHOC Spike glycoprotein OS=Human coronavirus OC43 OX=31631 GN=S PE=3 SV=1	1330	CTGCGTSCFKKCGGCCDDYTG
0.3	A0A2P1ZWW3	tr|A0A2P1ZWW3|A0A2P1ZWW3_CVHOC Spike glycoprotein OS=Human coronavirus OC43 OX=31631 GN=S PE=3 SV=1	1326	CTGCGTSCFKKCGGCCDDYTG
0.3	A0A0G2RC96	tr|A0A0G2RC96|A0A0G2RC96_CVHOC Spike glycoprotein OS=Human coronavirus OC43 OX=31631 GN=S PE=3 SV=1	1326	CTGCGTSCFKKCGGCCDDYTG
0.3	A0A1V0BZ81	tr|A0A1V0BZ81|A0A1V0BZ81_CVHOC Spike glycoprotein OS=Human coronavirus OC43 OX=31631 GN=S PE=3 SV=1	1326	CTGCGTSCFKKCGGCCDDYTG
0.3	S5YGG8	tr|S5YGG8|S5YGG8_CVHK1 Spike glycoprotein OS=Human coronavirus HKU1 OX=290028 GN=S PE=3 SV=1	1324	CTGCGSACFSKCHNCCDEYGG
0.3	A0A385H6K1	tr|A0A385H6K1|A0A385H6K1_CVHOC Spike glycoprotein OS=Human coronavirus OC43 OX=31631 GN=S PE=3 SV=1	1326	CTGCGTSCFKKCGGCCDDYTG
0.3	A0A1W6DZX7	tr|A0A1W6DZX7|A0A1W6DZX7_CVHOC Spike glycoprotein OS=Human coronavirus OC43 OX=31631 GN=S PE=3 SV=1	1330	CTGCGTSCFKKCGGCCDDYTG
0.3	A0A0G2RC85	tr|A0A0G2RC85|A0A0G2RC85_CVHOC Spike glycoprotein OS=Human coronavirus OC43 OX=31631 GN=S PE=3 SV=1	1321	CTGCGTSCFKKCGGCCDDYTG
0.3	A0A1S5VGL6	tr|A0A1S5VGL6|A0A1S5VGL6_CVHOC Spike glycoprotein OS=Human coronavirus OC43 OX=31631 GN=S PE=3 SV=1	1326	CTGCGTSCFKKCGGCCDDYTG
0.3	U3M701	tr|U3M701|U3M701_CVHOC Spike glycoprotein OS=Human coronavirus OC43 OX=31631 GN=S PE=3 SV=1	1329	CTGCGTSCFKKCGGCCDDYTG
0.3	A0A482K9I9	tr|A0A482K9I9|A0A482K9I9_CVHOC Spike glycoprotein OS=Human coronavirus OC43 OX=31631 GN=S PE=3 SV=1	1326	CTGCGTSCFKKCGGCCDDYTG
0.3	A0A224ANC0	tr|A0A224ANC0|A0A224ANC0_CVHOC Spike glycoprotein OS=Human coronavirus OC43 OX=31631 GN=S PE=3 SV=1	1326	CTGCGTSCFKKCGGCCDDYTG
0.3	J9SE37	tr|J9SE37|J9SE37_SARS 3C-like proteinase OS=Severe acute respiratory syndrome coronavirus OX=694009 GN=PP1a PE=3 SV=1	3750	GNTLQCIMLVYCFLGYCCCCY
0.3	A0A0B4N7J5	tr|A0A0B4N7J5|A0A0B4N7J5_CVHOC Spike glycoprotein OS=Human coronavirus OC43 OX=31631 GN=S PE=3 SV=1	1326	CTGCGTSCFKKCGGCCDDYTG
0.3	E0YJ44	tr|E0YJ44|E0YJ44_CVHK1 Spike glycoprotein OS=Human coronavirus HKU1 OX=290028 GN=S PE=3 SV=1	1324	CTGCGSACFSKCHNCCDEYGG
0.3	A0A3S6FHE0	tr|A0A3S6FHE0|A0A3S6FHE0_CVHOC Spike glycoprotein OS=Human coronavirus OC43 OX=31631 GN=S PE=3 SV=1	1326	CTGCGTSCFKKCGGCCDDYTG
0.3	A0A0B4N6K3	tr|A0A0B4N6K3|A0A0B4N6K3_CVHOC Spike glycoprotein OS=Human coronavirus OC43 OX=31631 GN=S PE=3 SV=1	1326	CTGCGTSCFKKCGGCCDDYTG
0.3	A0A5B9MWF9	tr|A0A5B9MWF9|A0A5B9MWF9_CVHOC Spike glycoprotein OS=Human coronavirus OC43 OX=31631 GN=S PE=3 SV=1	1330	CTGCGTSCFKKCGGCCDDYTG
0.3	A0A3S6FHK8	tr|A0A3S6FHK8|A0A3S6FHK8_CVHOC Spike glycoprotein OS=Human coronavirus OC43 OX=31631 GN=S PE=3 SV=1	1326	CTGCGTSCFKKCGGCCDDYTG
0.3	U3M7L0	tr|U3M7L0|U3M7L0_CVHOC Spike glycoprotein OS=Human coronavirus OC43 OX=31631 GN=S PE=3 SV=1	1328	CTGCGTSCFKKCGGCCDDYTG
0.3	A0A1W6E034	tr|A0A1W6E034|A0A1W6E034_CVHOC Spike glycoprotein OS=Human coronavirus OC43 OX=31631 GN=S PE=3 SV=1	1326	CTGCGTSCFKKCGGCCDDYTG
0.3	A0A0K0KPB6	tr|A0A0K0KPB6|A0A0K0KPB6_CVHOC Spike glycoprotein OS=Human coronavirus OC43 OX=31631 GN=S PE=3 SV=1	1326	CTGCGTSCFKKCGGCCDDYTG
0.3	A0A1V0E0Z4	tr|A0A1V0E0Z4|A0A1V0E0Z4_CVHK1 Spike glycoprotein OS=Human coronavirus HKU1 OX=290028 GN=S PE=3 SV=1	1320	CTGCGSACFSKCHNCCDEYGG
0.3	V9LPN0	tr|V9LPN0|V9LPN0_HCMV Protein UL133 OS=Human cytomegalovirus OX=10359 GN=UL133 PE=4 SV=1	76	IDLLTCRWVRYCSCSCKCSCK
0.3	L7X0I3	tr|L7X0I3|L7X0I3_HCMV UL133 OS=Human cytomegalovirus OX=10359 GN=UL133 PE=4 SV=1	76	IDVFTCRWVRYCSCSCKCSCK
0.3	L7X169	tr|L7X169|L7X169_HCMV UL133 OS=Human cytomegalovirus OX=10359 GN=UL133 PE=4 SV=1	76	IDVFTCRWVRYCSCSCKCSCK
0.3	A0A0G2UCX3	tr|A0A0G2UCX3|A0A0G2UCX3_HCMV Protein UL133 OS=Human cytomegalovirus OX=10359 GN=UL133 PE=4 SV=1	76	IDLLTCRWVRYCSCSCKCSCK
0.3	Q52N49	tr|Q52N49|Q52N49_HCMV UL133 OS=Human cytomegalovirus OX=10359 PE=4 SV=1	76	IDLLTCRWVRYCSCSCKCSCK
0.3	D2WA11	tr|D2WA11|D2WA11_HCMV Protein UL133 OS=Human cytomegalovirus OX=10359 GN=UL133 PE=4 SV=1	75	IDVFTCRWVRYCSCSCKCSCK
0.3	A0A0G2TRN4	tr|A0A0G2TRN4|A0A0G2TRN4_HCMV Protein UL133 OS=Human cytomegalovirus OX=10359 GN=UL133 PE=4 SV=1	76	IDLLTCRWVRYCSCSCKCSCK
0.3	A0A2H4GM89	tr|A0A2H4GM89|A0A2H4GM89_HCMV Protein UL133 OS=Human cytomegalovirus OX=10359 GN=UL133 PE=4 SV=1	76	IDILTCRWVRYCSCSCKCSCK
0.3	Q52N60	tr|Q52N60|Q52N60_HCMV UL133 OS=Human cytomegalovirus OX=10359 PE=4 SV=1	76	IDLLTCRWVRYCSCSCKCNCK
0.3	A0A0G2TLC9	tr|A0A0G2TLC9|A0A0G2TLC9_HCMV Protein UL133 OS=Human cytomegalovirus OX=10359 GN=UL133 PE=4 SV=1	76	IDLLTCRWVRYCSCSCKCSCK
0.3	Q5PX07	tr|Q5PX07|Q5PX07_HCMV UL133 OS=Human cytomegalovirus OX=10359 PE=4 SV=1	75	IDLLTCRWVRYCSCSCKCSCK
0.3	A0A6C2E877	tr|A0A6C2E877|A0A6C2E877_HCMV Protein UL133 OS=Human cytomegalovirus OX=10359 GN=UL133 PE=4 SV=1	75	IDVFTCRWVRYCSCSCKCSCK
0.3	L7WVZ1	tr|L7WVZ1|L7WVZ1_HCMV UL133 OS=Human cytomegalovirus OX=10359 GN=UL133 PE=4 SV=1	76	IDLLTCRWVRYCSCSCKCSCK
0.3	A0A6C2E6S0	tr|A0A6C2E6S0|A0A6C2E6S0_HCMV Protein UL133 OS=Human cytomegalovirus OX=10359 GN=UL133 PE=4 SV=1	76	IDLLTCRWVRHCSCSCKCSCK
0.3	A0A0G2U7V3	tr|A0A0G2U7V3|A0A0G2U7V3_HCMV Protein UL133 OS=Human cytomegalovirus OX=10359 GN=UL133 PE=4 SV=1	76	IDILTCRWVRYCSCSCKCSCK
0.3	A0A0A0PU34	tr|A0A0A0PU34|A0A0A0PU34_HCMV Protein UL133 OS=Human cytomegalovirus OX=10359 GN=UL133 PE=4 SV=1	75	IDVFTCRWVRYCSCSCKCSCK
0.3	D2W9Y7	tr|D2W9Y7|D2W9Y7_HCMV Protein UL133 OS=Human cytomegalovirus OX=10359 GN=UL133 PE=4 SV=1	75	IDVFTCRWVRYCSCSCKCSCK
0.3	A0A0G2UJZ0	tr|A0A0G2UJZ0|A0A0G2UJZ0_HCMV Protein UL133 OS=Human cytomegalovirus OX=10359 GN=UL133 PE=4 SV=1	76	IDILTCRWVRYCSCSCKCSCK
0.3	A0A0G2T7J3	tr|A0A0G2T7J3|A0A0G2T7J3_HCMV Protein UL133 OS=Human cytomegalovirus OX=10359 GN=UL133 PE=4 SV=1	76	IDVFTCRWVRYCSCSCKCSCK
0.3	A0A0G2TKK3	tr|A0A0G2TKK3|A0A0G2TKK3_HCMV Protein UL133 OS=Human cytomegalovirus OX=10359 GN=UL133 PE=4 SV=1	76	IDILTCRWVRYCSCSCKCSCK
0.3	A0A1L3IXL1	tr|A0A1L3IXL1|A0A1L3IXL1_HCMV Protein UL133 OS=Human cytomegalovirus OX=10359 GN=UL133 PE=4 SV=1	76	IDILTCRWVRYCSCSCKCSCK
0.3	A0A0G2TE49	tr|A0A0G2TE49|A0A0G2TE49_HCMV Protein UL133 OS=Human cytomegalovirus OX=10359 GN=UL133 PE=4 SV=1	76	IDLLTCRWVRYCSCSCKCSCK
0.3	A0A6C2E391	tr|A0A6C2E391|A0A6C2E391_HCMV Protein UL133 OS=Human cytomegalovirus OX=10359 GN=UL133 PE=4 SV=1	75	IDVFTCRWVRYCSCSCKCSCK
0.3	A0A159B2H9	tr|A0A159B2H9|A0A159B2H9_HCMV Protein UL133 OS=Human cytomegalovirus OX=10359 GN=UL133 PE=4 SV=1	75	IDVFTCRWVRYCSCSCKCSCK
0.3	A0A6C2E5A5	tr|A0A6C2E5A5|A0A6C2E5A5_HCMV Protein UL133 OS=Human cytomegalovirus OX=10359 GN=UL133 PE=4 SV=1	76	IDILTCRWVRYCSCSCKCSCK
0.3	A0A126N973	tr|A0A126N973|A0A126N973_HCMV Protein UL133 OS=Human cytomegalovirus OX=10359 GN=UL133 PE=4 SV=1	76	IDVFTCRWVRYCSCSCKCSCK
0.3	A0A0G2U432	tr|A0A0G2U432|A0A0G2U432_HCMV Protein UL133 OS=Human cytomegalovirus OX=10359 GN=UL133 PE=4 SV=1	76	IDLLTCRWVRYCSCSCKCNCK
0.3	A0A2H4GFD6	tr|A0A2H4GFD6|A0A2H4GFD6_HCMV Protein UL133 OS=Human cytomegalovirus OX=10359 GN=UL133 PE=4 SV=1	75	IDVFTCRWVRYCSCSCKCSCK
0.3	G9G9W9	tr|G9G9W9|G9G9W9_HEV Protein ORF3 (Fragment) OS=Hepatitis E virus OX=12461 PE=3 SV=1	1	ALGLFCFCSSCFCLCCPRHRP
0.3	A0A0G2UIE2	tr|A0A0G2UIE2|A0A0G2UIE2_HCMV Protein UL133 OS=Human cytomegalovirus OX=10359 GN=UL133 PE=4 SV=1	75	IDLLTCRWVRYCSCSCKCSCK
0.3	L7X3M4	tr|L7X3M4|L7X3M4_HCMV UL133 OS=Human cytomegalovirus OX=10359 GN=UL133 PE=4 SV=1	76	IDVFTCRWVRYCSCSCKCSCK
0.3	A0A159B0E2	tr|A0A159B0E2|A0A159B0E2_HCMV Protein UL133 OS=Human cytomegalovirus OX=10359 GN=UL133 PE=4 SV=1	76	IDVFTCRWVRYCSCSCKCSCK
0.3	A0A0G2U8I9	tr|A0A0G2U8I9|A0A0G2U8I9_HCMV Protein UL133 OS=Human cytomegalovirus OX=10359 GN=UL133 PE=4 SV=1	76	IDLLTCRWVRYCSCSCKCSCK
0.3	Q52N52	tr|Q52N52|Q52N52_HCMV UL133 OS=Human cytomegalovirus OX=10359 PE=4 SV=1	75	IDLLTCRWVRYCSCSCKCSCK
0.3	L7WVY5	tr|L7WVY5|L7WVY5_HCMV UL133 OS=Human cytomegalovirus OX=10359 GN=UL133 PE=4 SV=1	75	IDLLTCRWVRYCSCSCKCSCK
0.3	A0A0G2U3G4	tr|A0A0G2U3G4|A0A0G2U3G4_HCMV Protein UL133 OS=Human cytomegalovirus OX=10359 GN=UL133 PE=4 SV=1	75	IDLLTCRWVRYCSCSCKCSCK
0.3	A0A654J7A2	tr|A0A654J7A2|A0A654J7A2_HCMV Protein UL133 OS=Human cytomegalovirus OX=10359 GN=UL133 PE=4 SV=1	75	IDLLTCRWVRYCSCSCKCSCK
0.3	A0A0G2TYZ3	tr|A0A0G2TYZ3|A0A0G2TYZ3_HCMV Protein UL133 OS=Human cytomegalovirus OX=10359 GN=UL133 PE=4 SV=1	76	IDILTCRWVRYCSCSCKCSCK
0.3	A0A126NAD7	tr|A0A126NAD7|A0A126NAD7_HCMV Protein UL133 OS=Human cytomegalovirus OX=10359 GN=UL133 PE=4 SV=1	76	IDLLTCRWVRYCSCSCKCSCK
0.3	L7X1E9	tr|L7X1E9|L7X1E9_HCMV UL133 OS=Human cytomegalovirus OX=10359 GN=UL133 PE=4 SV=1	75	IDLLTCRWVRYCSCSCKCSCK
0.3	A0A159B2D5	tr|A0A159B2D5|A0A159B2D5_HCMV Protein UL133 OS=Human cytomegalovirus OX=10359 GN=UL133 PE=4 SV=1	76	IDLLTCRWVRYCSCSCKCSCK
0.3	A0A126NHH0	tr|A0A126NHH0|A0A126NHH0_HCMV Protein UL133 OS=Human cytomegalovirus OX=10359 GN=UL133 PE=4 SV=1	76	IDLLTCRWVRYCSCSCKCSCK
0.3	V9LLZ0	tr|V9LLZ0|V9LLZ0_HCMVM Protein UL133 OS=Human cytomegalovirus (strain Merlin) OX=295027 GN=UL133 PE=4 SV=1	75	IDVFTCRWVRYCSCSCKCSCK
0.3	A0A2H4GIT9	tr|A0A2H4GIT9|A0A2H4GIT9_HCMV Protein UL133 OS=Human cytomegalovirus OX=10359 GN=UL133 PE=4 SV=1	75	IDLLTCRWVRYCSCSCKCSCK
0.3	Q5PX12	tr|Q5PX12|Q5PX12_HCMV UL133 OS=Human cytomegalovirus OX=10359 PE=4 SV=1	75	IDLLTCRWVRYCSCSCKCSCK
0.3	A0A0G2U7I7	tr|A0A0G2U7I7|A0A0G2U7I7_HCMV Protein UL133 OS=Human cytomegalovirus OX=10359 GN=UL133 PE=4 SV=1	76	IDLLTCRWVRYCSCSCKCSCK
0.3	Q5PX04	tr|Q5PX04|Q5PX04_HCMV UL133 OS=Human cytomegalovirus OX=10359 PE=4 SV=1	75	IDLLTCRWVRYCSCGCKCSCK
0.3	L7X166	tr|L7X166|L7X166_HCMV UL133 OS=Human cytomegalovirus OX=10359 GN=UL133 PE=4 SV=1	75	IDVFTCRWVRYCSCSCKCSCK
0.3	A0A0R5E4R9	tr|A0A0R5E4R9|A0A0R5E4R9_HCMV Protein UL133 OS=Human cytomegalovirus OX=10359 GN=UL133 PE=4 SV=1	76	IDLLTCRWVRYCSCSCKCSCK
0.3	A0A0G2T8J9	tr|A0A0G2T8J9|A0A0G2T8J9_HCMV Protein UL133 OS=Human cytomegalovirus OX=10359 GN=UL133 PE=4 SV=1	76	IDVFTCRWVRYCSCSCKCSCK
0.3	D2W9G9	tr|D2W9G9|D2W9G9_HCMV Protein UL133 OS=Human cytomegalovirus OX=10359 GN=UL133 PE=4 SV=1	75	IDLLTCRWVRYCSCSCKCSCK
0.3	A0A0R5E2A9	tr|A0A0R5E2A9|A0A0R5E2A9_HCMV Protein UL133 OS=Human cytomegalovirus OX=10359 GN=UL133 PE=4 SV=1	76	IDILTCRWVRYCSCSCKCSCK
0.3	A0A2H4GFU3	tr|A0A2H4GFU3|A0A2H4GFU3_HCMV Protein UL133 OS=Human cytomegalovirus OX=10359 GN=UL133 PE=4 SV=1	76	IDLLTCRWVRYCSCSCKCSCK
0.3	A0A2H4GGA2	tr|A0A2H4GGA2|A0A2H4GGA2_HCMV Protein UL133 OS=Human cytomegalovirus OX=10359 GN=UL133 PE=4 SV=1	75	IDLLTCRWVRYCSCSCKCSCK
0.3	V9PVK0	tr|V9PVK0|V9PVK0_HCMV Protein UL133 OS=Human cytomegalovirus OX=10359 GN=UL133 PE=4 SV=1	75	IDVFTCRWVRYCSCSCKCSCK
0.3	Q5PX15	tr|Q5PX15|Q5PX15_HCMV UL133 OS=Human cytomegalovirus OX=10359 PE=4 SV=1	75	IDLLTCRWVRYCSCSCKCSCK
0.3	A0A2I2MMR6	tr|A0A2I2MMR6|A0A2I2MMR6_HCMV Protein UL133 OS=Human cytomegalovirus OX=10359 GN=UL133 PE=4 SV=1	76	IDVFTCRWVRYCSCSCKCSCK
0.3	L7WVX8	tr|L7WVX8|L7WVX8_HCMV UL133 OS=Human cytomegalovirus OX=10359 GN=UL133 PE=4 SV=1	75	IDLFTCRWVRYCSCSCKCSCK
0.3	G4Y819	tr|G4Y819|G4Y819_BUNYW Envelopment polyprotein (Fragment) OS=Bunyamwera virus OX=35304 PE=4 SV=1	196	CTCCGLAYHPFTNCGSYCVCG
0.3	Q2IB32	tr|Q2IB32|Q2IB32_HEV Protein ORF3 OS=Hepatitis E virus OX=12461 PE=2 SV=1	3	MPPRALGLFCFCSSCFCLCCP
0.3	A0A6C2E7H1	tr|A0A6C2E7H1|A0A6C2E7H1_HCMV Protein UL133 OS=Human cytomegalovirus OX=10359 GN=UL133 PE=4 SV=1	76	IDILTCRWVRYCSCSCKCSCK
0.3	Q5PX13	tr|Q5PX13|Q5PX13_HCMV UL133 OS=Human cytomegalovirus OX=10359 PE=4 SV=1	76	IDVFTCRWVRYCSCSCKCSCK
0.3	A0A126NDY2	tr|A0A126NDY2|A0A126NDY2_HCMV Protein UL133 OS=Human cytomegalovirus OX=10359 GN=UL133 PE=4 SV=1	76	IDLLTCRWVRYCSCSCKCSCK
0.3	A0A0G2U329	tr|A0A0G2U329|A0A0G2U329_HCMV Protein UL133 OS=Human cytomegalovirus OX=10359 GN=UL133 PE=4 SV=1	76	IDVFTCRWVRYCSCSCKCSCK
0.3	L7X0I7	tr|L7X0I7|L7X0I7_HCMV UL133 OS=Human cytomegalovirus OX=10359 GN=UL133 PE=4 SV=1	76	IDLLTCRWVRYCSCSCKCSCK
0.3	A0A0G2UES6	tr|A0A0G2UES6|A0A0G2UES6_HCMV Protein UL133 OS=Human cytomegalovirus OX=10359 GN=UL133 PE=4 SV=1	76	IDLLTCRWVRYCSCSCKCSCK
0.3	L7X3M7	tr|L7X3M7|L7X3M7_HCMV UL133 OS=Human cytomegalovirus OX=10359 GN=UL133 PE=4 SV=1	75	IDVFTCRWVRYCSCSCKCSCK
0.3	A0A0G2TJ56	tr|A0A0G2TJ56|A0A0G2TJ56_HCMV Protein UL133 OS=Human cytomegalovirus OX=10359 GN=UL133 PE=4 SV=1	76	IDILTCRWVRYCSCSCKCSCK
0.3	A0A2H4GLA2	tr|A0A2H4GLA2|A0A2H4GLA2_HCMV Protein UL133 OS=Human cytomegalovirus OX=10359 GN=UL133 PE=4 SV=1	76	IDVFTCRWVRYCSCSCKCSCK
0.3	Q5PX18	tr|Q5PX18|Q5PX18_HCMV UL133 OS=Human cytomegalovirus OX=10359 PE=4 SV=1	76	IDVFTCRWVRYCSCSCKCSCK
0.3	A0A162DTG2	tr|A0A162DTG2|A0A162DTG2_HCMV Protein UL133 OS=Human cytomegalovirus OX=10359 GN=UL133 PE=4 SV=1	76	IDILTCRWVRYCSCSCKCSCK
0.3	A0A0G2TZ82	tr|A0A0G2TZ82|A0A0G2TZ82_HCMV Protein UL133 OS=Human cytomegalovirus OX=10359 GN=UL133 PE=4 SV=1	75	IDVFTCRWVRYCSCSCKCSCK
0.3	Q52N62	tr|Q52N62|Q52N62_HCMV UL133 OS=Human cytomegalovirus OX=10359 PE=4 SV=1	76	IDLLTCRWVRYCSCSCKCNCK
0.3	A0A0G2TCZ1	tr|A0A0G2TCZ1|A0A0G2TCZ1_HCMV Protein UL133 OS=Human cytomegalovirus OX=10359 GN=UL133 PE=4 SV=1	76	IDVFTCRWVRYCSCSCKCSCK
0.3	L7X3N0	tr|L7X3N0|L7X3N0_HCMV UL133 OS=Human cytomegalovirus OX=10359 GN=UL133 PE=4 SV=1	76	IDLLTCRWVRYCSCSCKCSCK
0.3	A0A0G2UDL2	tr|A0A0G2UDL2|A0A0G2UDL2_HCMV Protein UL133 OS=Human cytomegalovirus OX=10359 GN=UL133 PE=4 SV=1	76	IDVFTCRWVRYCSCSCKCSCK
0.3	A0A0R5EFL6	tr|A0A0R5EFL6|A0A0R5EFL6_HCMV Protein UL133 OS=Human cytomegalovirus OX=10359 GN=UL133 PE=4 SV=1	76	IDLLTCRWVRYCSCSCKCSCK
0.3	A0A0G2TWT4	tr|A0A0G2TWT4|A0A0G2TWT4_HCMV Protein UL133 OS=Human cytomegalovirus OX=10359 GN=UL133 PE=4 SV=1	75	IDVFTCRWVRYCSCSCKCSCK
0.3	D2W9P1	tr|D2W9P1|D2W9P1_HCMV Protein UL133 OS=Human cytomegalovirus OX=10359 GN=UL133 PE=4 SV=1	76	IDVFTCRWVRYCSCSCKCSCK
0.3	A0A0G2TWI3	tr|A0A0G2TWI3|A0A0G2TWI3_HCMV Protein UL133 OS=Human cytomegalovirus OX=10359 GN=UL133 PE=4 SV=1	75	IDVFTCRWVRYCSCSCKCSCK
0.3	A0A0G2TKE5	tr|A0A0G2TKE5|A0A0G2TKE5_HCMV Protein UL133 OS=Human cytomegalovirus OX=10359 GN=UL133 PE=4 SV=1	76	IDILTCRWVRYCSCSCKCSCK
0.3	Q5PX02	tr|Q5PX02|Q5PX02_HCMV UL133 OS=Human cytomegalovirus OX=10359 PE=4 SV=1	76	IDVFTCRWVRYCSCSCKCSCK
0.3	A0A0G2UEZ1	tr|A0A0G2UEZ1|A0A0G2UEZ1_HCMV Protein UL133 OS=Human cytomegalovirus OX=10359 GN=UL133 PE=4 SV=1	76	IDVFTCRWVRYCSCSCKCSCK
0.3	A0A0A7CGV9	tr|A0A0A7CGV9|A0A0A7CGV9_HCMV Protein UL133 OS=Human cytomegalovirus OX=10359 GN=UL133 PE=4 SV=1	75	IDVFTCRWVRYCSCSCKCSCK
0.3	A0A0R5E7S6	tr|A0A0R5E7S6|A0A0R5E7S6_HCMV Protein UL133 OS=Human cytomegalovirus OX=10359 GN=UL133 PE=4 SV=1	75	IDVFTCRWVRYCSCSCKCSCK
0.3	A0A2H4GQM8	tr|A0A2H4GQM8|A0A2H4GQM8_HCMV Protein UL133 OS=Human cytomegalovirus OX=10359 GN=UL133 PE=4 SV=1	76	IDLLTCRWVRHCSCSCKCSCK
0.3	A0A0G2UIT4	tr|A0A0G2UIT4|A0A0G2UIT4_HCMV Protein UL133 OS=Human cytomegalovirus OX=10359 GN=UL133 PE=4 SV=1	75	IDVFTCRWVRYCSCSCKCSCK
0.3	A0A140D1G3	tr|A0A140D1G3|A0A140D1G3_HCMV Protein UL133 OS=Human cytomegalovirus OX=10359 GN=UL133 PE=4 SV=1	76	IDLLTCRWVRYCSCSCKCSCK
0.3	Q52N56	tr|Q52N56|Q52N56_HCMV UL133 OS=Human cytomegalovirus OX=10359 PE=4 SV=1	75	IDVFTCRWVRYCSCSCKCSCK
0.3	Q52N61	tr|Q52N61|Q52N61_HCMV UL133 OS=Human cytomegalovirus OX=10359 PE=4 SV=1	75	IDVFTCRWVRYCSCSCKCSCK
0.3	A0A140IIT1	tr|A0A140IIT1|A0A140IIT1_HCMV Protein UL133 OS=Human cytomegalovirus OX=10359 GN=UL133 PE=4 SV=1	76	IDLLTCRWVRYCSCSCKCSCK
0.3	D2IGB3	tr|D2IGB3|D2IGB3_HCMV Protein UL133 OS=Human cytomegalovirus OX=10359 GN=UL133 PE=4 SV=1	76	IDLLTCRWVRHCSCSCKCSCK
0.3	A0A0G2TEB6	tr|A0A0G2TEB6|A0A0G2TEB6_HCMV Protein UL133 OS=Human cytomegalovirus OX=10359 GN=UL133 PE=4 SV=1	75	IDVFTCRWVRYCSCSCKCSCK
0.3	A0A0G2T7F6	tr|A0A0G2T7F6|A0A0G2T7F6_HCMV Protein UL133 OS=Human cytomegalovirus OX=10359 GN=UL133 PE=4 SV=1	76	IDLLTCRWVRYCSCSCKCSCK
0.3	A0A0N7I6R2	tr|A0A0N7I6R2|A0A0N7I6R2_HPV82 Probable protein E5 (Fragment) OS=Human papillomavirus type 82 OX=129724 GN=E5 PE=3 SV=1	5	AVFLVCLFVLCVCVCLVLCCL
0.3	A0A1Z1R0Z6	tr|A0A1Z1R0Z6|A0A1Z1R0Z6_CVH22 Spike protein OS=Human coronavirus 229E OX=11137 PE=4 SV=1	1133	LCCCSTGCCGFFSCFASSIRG
0.3	S5YNN4	tr|S5YNN4|S5YNN4_CVH22 Spike glycoprotein OS=Human coronavirus 229E OX=11137 GN=S PE=4 SV=1	1132	LCCCSTGCCGFFSCFASSIRG
0.3	A0A384RHP9	tr|A0A384RHP9|A0A384RHP9_CVH22 Spike glycoprotein OS=Human coronavirus 229E OX=11137 GN=S PE=4 SV=1	1133	LCCCSTGCCGFFSCFASSIRG
0.3	S5YNL7	tr|S5YNL7|S5YNL7_CVH22 Spike glycoprotein OS=Human coronavirus 229E OX=11137 GN=S PE=3 SV=1	1132	LCCCSTGCCGFFSCFASSIRG
0.3	A0A384RNQ9	tr|A0A384RNQ9|A0A384RNQ9_CVH22 Spike glycoprotein OS=Human coronavirus 229E OX=11137 GN=S PE=4 SV=1	1132	LCCCSTGCCGFFSCFASSIRG
0.3	Q6SWM8	tr|Q6SWM8|Q6SWM8_HCMVT Protein UL133 OS=Human cytomegalovirus (strain Towne) OX=10363 GN=UL133 PE=4 SV=1	76	IDLLTCRWVRYCSCSCKCSCK
0.3	Q9QJ59	sp|Q9QJ59|B4_HHV6Z Protein B4 OS=Human herpesvirus 6B (strain Z29) OX=36351 GN=B4 PE=4 SV=1	17	VCIFLCVFFCVCIFLCVFFCV
0.3	P15423	sp|P15423|SPIKE_CVH22 Spike glycoprotein OS=Human coronavirus 229E OX=11137 GN=S PE=1 SV=1	1135	LCCCSTGCCGFFSCFASSIRG
0.25	A0A2P1HPZ5	tr|A0A2P1HPZ5|A0A2P1HPZ5_HPV16 Probable protein E5 OS=Human papillomavirus type 16 OX=333760 GN=E5 PE=3 SV=1	14	CFLLCFCVLLCVCLLIRPGGG
0.25	A0A2P1I8A9	tr|A0A2P1I8A9|A0A2P1I8A9_HPV16 Probable protein E5 OS=Human papillomavirus type 16 OX=333760 GN=E5 PE=3 SV=1	7	ASTTLLACFLLCFCVLLCVCL
0.25	A0A2P1HPZ9	tr|A0A2P1HPZ9|A0A2P1HPZ9_HPV16 Probable protein E5 OS=Human papillomavirus type 16 OX=333760 GN=E5 PE=3 SV=1	7	ASTTLLACFLLCFCVLLCVCL
0.25	F8S4A7	tr|F8S4A7|F8S4A7_HPV35 Probable protein E5 OS=Human papillomavirus type 35 OX=10587 GN=E5 PE=3 SV=1	10	VLLCFLLCFCVLLCLCLLVRS
0.25	A0A0P0EWW0	tr|A0A0P0EWW0|A0A0P0EWW0_HPV53 Probable protein E5 (Fragment) OS=Human papillomavirus type 53 OX=333765 GN=E5 PE=3 SV=1	7	IVLCVSFVFLLCCFVCLFVCF
0.25	A0A0R8HZ44	tr|A0A0R8HZ44|A0A0R8HZ44_ORFV Uncharacterized protein OS=Orf virus OX=10258 GN=ORFV120 PE=4 SV=1	140	YKQGLCNCFCKMFPCCKELKD
0.25	Q77AB9	tr|Q77AB9|Q77AB9_HPV16 Probable protein E5 (Fragment) OS=Human papillomavirus type 16 OX=333760 GN=E5 PE=3 SV=1	8	CFLLCFCVLLCVCLLIRPLLL
0.25	A0A2P1IEB0	tr|A0A2P1IEB0|A0A2P1IEB0_HPV16 Probable protein E5 OS=Human papillomavirus type 16 OX=333760 GN=E5 PE=3 SV=1	7	ASTTLLACFLLCFCVLLCVCL
0.25	A0A2P1HJU8	tr|A0A2P1HJU8|A0A2P1HJU8_HPV16 Probable protein E5 OS=Human papillomavirus type 16 OX=333760 GN=E5 PE=3 SV=1	9	TTLLACFLLCFCVLLCVCLLI
0.25	A0A2P1HRX9	tr|A0A2P1HRX9|A0A2P1HRX9_HPV16 Probable protein E5 OS=Human papillomavirus type 16 OX=333760 GN=E5 PE=3 SV=1	7	ASTTLLACFLLCFCVLLCVCL
0.25	A0A2P1HUQ2	tr|A0A2P1HUQ2|A0A2P1HUQ2_HPV16 Probable protein E5 OS=Human papillomavirus type 16 OX=333760 GN=E5 PE=3 SV=1	7	ASTTLLACFLLCFCVLLCVCL
0.25	A0A2P1IHM9	tr|A0A2P1IHM9|A0A2P1IHM9_HPV16 Probable protein E5 OS=Human papillomavirus type 16 OX=333760 GN=E5 PE=3 SV=1	9	TTLLACFLLCFCVLLCVCLLI
0.25	Q9WIV4	tr|Q9WIV4|Q9WIV4_HPV16 Probable protein E5 (Fragment) OS=Human papillomavirus type 16 OX=333760 GN=E5 PE=3 SV=1	8	CFLLCFCVLLCVCLLIRPLLL
0.25	A0A2P1I753	tr|A0A2P1I753|A0A2P1I753_HPV16 Probable protein E5 OS=Human papillomavirus type 16 OX=333760 GN=E5 PE=3 SV=1	7	ASTTLLACFLLCFCVLLCVCL
0.25	A0A142KD21	tr|A0A142KD21|A0A142KD21_HPV16 Probable protein E5 OS=Human papillomavirus type 16 OX=333760 GN=E5 PE=3 SV=1	7	ASTTLLACLLLCFCVLLCVCL
0.25	A0A2P1I113	tr|A0A2P1I113|A0A2P1I113_HPV16 Probable protein E5 OS=Human papillomavirus type 16 OX=333760 GN=E5 PE=3 SV=1	7	ASTTLLACFLLCFCVLLCVCL
0.25	A0A0M4ATV5	tr|A0A0M4ATV5|A0A0M4ATV5_HPV16 Probable protein E5 OS=Human papillomavirus type 16 OX=333760 PE=3 SV=1	7	ASTTLLACFLLCFCVLLCVCL
0.25	A0A2P1ICT9	tr|A0A2P1ICT9|A0A2P1ICT9_HPV16 Probable protein E5 OS=Human papillomavirus type 16 OX=333760 GN=E5 PE=3 SV=1	7	ASTTLLACFLLCFCVLLCVCL
0.25	A0A2P1HPD5	tr|A0A2P1HPD5|A0A2P1HPD5_HPV16 Probable protein E5 OS=Human papillomavirus type 16 OX=333760 GN=E5 PE=3 SV=1	7	ASTTLLACFLLCFCVLLCVCL
0.25	Q77AD4	tr|Q77AD4|Q77AD4_HPV16 Probable protein E5 (Fragment) OS=Human papillomavirus type 16 OX=333760 GN=E5 PE=3 SV=1	8	CFLLCFCVLLCVCLLIRPLLL
0.25	A0A2P1HQQ5	tr|A0A2P1HQQ5|A0A2P1HQQ5_HPV16 Probable protein E5 OS=Human papillomavirus type 16 OX=333760 GN=E5 PE=3 SV=1	7	ASTTLLACFLLCFCVLLCVCL
0.25	A0A6B9RN60	tr|A0A6B9RN60|A0A6B9RN60_9INFB Glycoprotein NB OS=Influenza B virus OX=11520 GN=NB PE=3 SV=1	46	RNNCTNNAIGLCKCIECSGCE
0.25	Q77AD2	tr|Q77AD2|Q77AD2_HPV16 Probable protein E5 (Fragment) OS=Human papillomavirus type 16 OX=333760 GN=E5 PE=3 SV=1	8	CFLLCFCVLLCVCLLIRPLLL
0.25	A0A2P1HHK2	tr|A0A2P1HHK2|A0A2P1HHK2_HPV16 Probable protein E5 OS=Human papillomavirus type 16 OX=333760 GN=E5 PE=3 SV=1	7	ASTTLLACFLLCFCVLLCVCL
0.25	A0A2P1I6K0	tr|A0A2P1I6K0|A0A2P1I6K0_HPV16 Probable protein E5 OS=Human papillomavirus type 16 OX=333760 GN=E5 PE=3 SV=1	9	TTLLACFLLCFCVLLCVCLLI
0.25	A0A2P1HLC6	tr|A0A2P1HLC6|A0A2P1HLC6_HPV16 Probable protein E5 OS=Human papillomavirus type 16 OX=333760 GN=E5 PE=3 SV=1	9	TTLLACFLLCFCVLLCVCLLI
0.25	A0A2P1HXZ3	tr|A0A2P1HXZ3|A0A2P1HXZ3_HPV16 Probable protein E5 OS=Human papillomavirus type 16 OX=333760 GN=E5 PE=3 SV=1	7	ASTTLLACFLLCFCVLLCVCL
0.25	A0A2P1HB74	tr|A0A2P1HB74|A0A2P1HB74_HPV16 Probable protein E5 OS=Human papillomavirus type 16 OX=333760 GN=E5 PE=3 SV=1	14	CFLLCFCVLLCVCLLIRPLLG
0.25	A0A2P1IA41	tr|A0A2P1IA41|A0A2P1IA41_HPV16 Probable protein E5 OS=Human papillomavirus type 16 OX=333760 GN=E5 PE=3 SV=1	7	ASTTLLACFLLCFCVLLCVCL
0.25	A0A2P1I1I7	tr|A0A2P1I1I7|A0A2P1I1I7_HPV16 Probable protein E5 OS=Human papillomavirus type 16 OX=333760 GN=E5 PE=3 SV=1	7	ASTTLLACFVLCFCVLLCVCL
0.25	A0A2P1I0E1	tr|A0A2P1I0E1|A0A2P1I0E1_HPV16 Probable protein E5 OS=Human papillomavirus type 16 OX=333760 GN=E5 PE=3 SV=1	7	ASTTLLACFLLCFCVLLCVCL
0.25	Q9WIV3	tr|Q9WIV3|Q9WIV3_HPV16 Probable protein E5 (Fragment) OS=Human papillomavirus type 16 OX=333760 GN=E5 PE=3 SV=1	8	CFLLCFCVLLCVCLLIRPLLL
0.25	A0A2P1HJT8	tr|A0A2P1HJT8|A0A2P1HJT8_HPV16 Probable protein E5 OS=Human papillomavirus type 16 OX=333760 GN=E5 PE=3 SV=1	9	TTLLACFLLCFCVLLCVCLLI
0.25	Q9WA26	tr|Q9WA26|Q9WA26_HPV16 Probable protein E5 (Fragment) OS=Human papillomavirus type 16 OX=333760 GN=E5 PE=3 SV=1	8	CFLLCFCVLLCVCLLIRPLLL
0.25	A0A2P1HHU5	tr|A0A2P1HHU5|A0A2P1HHU5_HPV16 Probable protein E5 OS=Human papillomavirus type 16 OX=333760 GN=E5 PE=3 SV=1	7	ASTTLLACFLLCFCVLLCVCL
0.25	J3XM75	tr|J3XM75|J3XM75_HPV16 Probable protein E5 OS=Human papillomavirus type 16 OX=333760 GN=E5 PE=3 SV=1	7	ASTTLLACFLLCFCVLLCVCL
0.25	A0A2P1I513	tr|A0A2P1I513|A0A2P1I513_HPV16 Probable protein E5 OS=Human papillomavirus type 16 OX=333760 GN=E5 PE=3 SV=1	7	ASTTLLACFLLCFCVLLCVCL
0.25	Q77AA3	tr|Q77AA3|Q77AA3_HPV16 Probable protein E5 (Fragment) OS=Human papillomavirus type 16 OX=333760 GN=E5 PE=3 SV=1	8	CFLLCFCVLLCVCLLIRPLLL
0.25	A0A2P1I371	tr|A0A2P1I371|A0A2P1I371_HPV16 Probable protein E5 OS=Human papillomavirus type 16 OX=333760 GN=E5 PE=3 SV=1	7	ASTTLLACFLLCFCVLLCVCL
0.25	Q77AB7	tr|Q77AB7|Q77AB7_HPV16 Probable protein E5 (Fragment) OS=Human papillomavirus type 16 OX=333760 GN=E5 PE=3 SV=1	8	CFLLCFCVLLCVCLLIRPLLL
0.25	A0A2P1HT66	tr|A0A2P1HT66|A0A2P1HT66_HPV16 Probable protein E5 OS=Human papillomavirus type 16 OX=333760 GN=E5 PE=3 SV=1	7	ASTTLLACFLLCFCVLLCVCL
0.25	A0A2P1I1U3	tr|A0A2P1I1U3|A0A2P1I1U3_HPV16 Probable protein E5 OS=Human papillomavirus type 16 OX=333760 GN=E5 PE=3 SV=1	7	ASTTLLACFLLCFCVLLCVCL
0.25	Q77AC0	tr|Q77AC0|Q77AC0_HPV16 Probable protein E5 (Fragment) OS=Human papillomavirus type 16 OX=333760 GN=E5 PE=3 SV=1	8	CFLLCFCVLLCVCLLIRPLLL
0.25	A0A0M5IBP1	tr|A0A0M5IBP1|A0A0M5IBP1_HPV16 Probable protein E5 OS=Human papillomavirus type 16 OX=333760 PE=3 SV=1	7	ASTTLLACFLLCFCVLLCVCL
0.25	A0A2P1ILN4	tr|A0A2P1ILN4|A0A2P1ILN4_HPV16 Probable protein E5 OS=Human papillomavirus type 16 OX=333760 GN=E5 PE=3 SV=1	7	ASTTLLACFLLCFCVLLCVCL
0.25	A0A384LCT8	tr|A0A384LCT8|A0A384LCT8_HPV16 Probable protein E5 OS=Human papillomavirus type 16 OX=333760 GN=E5 PE=3 SV=1	7	ASTTLLACFLLCFCVLLCVCL
0.25	A0A2P1IG55	tr|A0A2P1IG55|A0A2P1IG55_HPV16 Probable protein E5 OS=Human papillomavirus type 16 OX=333760 GN=E5 PE=3 SV=1	7	ASTTLLACFLLCFCVLLCVCL
0.25	Q77AD1	tr|Q77AD1|Q77AD1_HPV16 Probable protein E5 (Fragment) OS=Human papillomavirus type 16 OX=333760 GN=E5 PE=3 SV=1	8	CFLLCFCVLLCVCLLIRPLLL
0.25	A0A2P1HH54	tr|A0A2P1HH54|A0A2P1HH54_HPV16 Probable protein E5 OS=Human papillomavirus type 16 OX=333760 GN=E5 PE=3 SV=1	14	CFLLCFCVLLCVCLLIRPLLG
0.25	A0A2P1IKV8	tr|A0A2P1IKV8|A0A2P1IKV8_HPV16 Probable protein E5 OS=Human papillomavirus type 16 OX=333760 GN=E5 PE=3 SV=1	7	ASTTLLACFLLCFCVLLCVCL
0.25	A0A2P1HFB9	tr|A0A2P1HFB9|A0A2P1HFB9_HPV16 Probable protein E5 OS=Human papillomavirus type 16 OX=333760 GN=E5 PE=3 SV=1	7	TSTTLLACFLLCFCVLLCVCL
0.25	Q77AB5	tr|Q77AB5|Q77AB5_HPV16 Probable protein E5 (Fragment) OS=Human papillomavirus type 16 OX=333760 GN=E5 PE=3 SV=1	8	CFLLCFCVLLCVCLLIRPLLL
0.25	Q77AC2	tr|Q77AC2|Q77AC2_HPV16 Probable protein E5 (Fragment) OS=Human papillomavirus type 16 OX=333760 GN=E5 PE=3 SV=1	8	CFLLCFCVLLCVCLLIRPLLL
0.25	Q77AB3	tr|Q77AB3|Q77AB3_HPV16 Probable protein E5 (Fragment) OS=Human papillomavirus type 16 OX=333760 GN=E5 PE=3 SV=1	8	CFLLCFCVLLCVCLLIRPLLL
0.25	A0A2P1HZ53	tr|A0A2P1HZ53|A0A2P1HZ53_HPV16 Probable protein E5 OS=Human papillomavirus type 16 OX=333760 GN=E5 PE=3 SV=1	7	ASTTLLACFLLCFCVLLCVCL
0.25	J3UEA1	tr|J3UEA1|J3UEA1_HPV16 Probable protein E5 OS=Human papillomavirus type 16 OX=333760 GN=E5 PE=3 SV=1	7	ASTTLLACFLLCFCVLLCVCL
0.25	Q9WIV5	tr|Q9WIV5|Q9WIV5_HPV16 Probable protein E5 (Fragment) OS=Human papillomavirus type 16 OX=333760 GN=E5 PE=3 SV=1	8	CFLLCFCVLLCVCLLIRPLLL
0.25	A0A2P1I5B5	tr|A0A2P1I5B5|A0A2P1I5B5_HPV16 Probable protein E5 OS=Human papillomavirus type 16 OX=333760 GN=E5 PE=3 SV=1	7	ASTTLLACFLLCFCVLLCVCL
0.25	A0A2P1HLR7	tr|A0A2P1HLR7|A0A2P1HLR7_HPV16 Probable protein E5 OS=Human papillomavirus type 16 OX=333760 GN=E5 PE=3 SV=1	7	ASTTLLACFLLCFCVLLCVCL
0.25	Q77AB8	tr|Q77AB8|Q77AB8_HPV16 Probable protein E5 (Fragment) OS=Human papillomavirus type 16 OX=333760 GN=E5 PE=3 SV=1	8	CFLLCFCVLLCVCLLIRPLLL
0.25	Q9WGD1	tr|Q9WGD1|Q9WGD1_HPV16 Probable protein E5 OS=Human papillomavirus type 16 OX=333760 GN=E5 PE=3 SV=1	7	ASTTLLACFLLCFCVLLCVCL
0.25	A0A2Z5ZNW6	tr|A0A2Z5ZNW6|A0A2Z5ZNW6_HPV16 Probable protein E5 OS=Human papillomavirus type 16 OX=333760 GN=E5 PE=3 SV=1	7	ASTTLLACFLLCFCVLLCVCL
0.25	A0A2P1HUH3	tr|A0A2P1HUH3|A0A2P1HUH3_HPV16 Probable protein E5 OS=Human papillomavirus type 16 OX=333760 GN=E5 PE=3 SV=1	14	CFLLCFCVLLCVCLLIRPLLG
0.25	Q9W9S8	tr|Q9W9S8|Q9W9S8_HPV16 Probable protein E5 (Fragment) OS=Human papillomavirus type 16 OX=333760 GN=E5 PE=3 SV=1	8	CFLLCFCVLLCVCLLIRPLLL
0.25	A0A2P1HYN1	tr|A0A2P1HYN1|A0A2P1HYN1_HPV16 Probable protein E5 (Fragment) OS=Human papillomavirus type 16 OX=333760 GN=E5 PE=3 SV=1	7	ASTTLLACFLLCFCVLLCVCL
0.25	A0A2P1HQS3	tr|A0A2P1HQS3|A0A2P1HQS3_HPV16 Probable protein E5 OS=Human papillomavirus type 16 OX=333760 GN=E5 PE=3 SV=1	7	ASTTLLACFLLCFCVLLCVCL
0.25	Q9WGD4	tr|Q9WGD4|Q9WGD4_HPV16 Probable protein E5 OS=Human papillomavirus type 16 OX=333760 GN=E5 PE=3 SV=1	7	TSTTLLACFLLCFCVLLCVCL
0.25	A0A2P1HP71	tr|A0A2P1HP71|A0A2P1HP71_HPV16 Probable protein E5 OS=Human papillomavirus type 16 OX=333760 GN=E5 PE=3 SV=1	7	ASTTLLACFLLCFCVLLCVCL
0.25	A0A2P1HHX5	tr|A0A2P1HHX5|A0A2P1HHX5_HPV16 Probable protein E5 OS=Human papillomavirus type 16 OX=333760 GN=E5 PE=3 SV=1	7	ASTTLLACFLLCFCVLLCVCL
0.25	A0A2P1HRL5	tr|A0A2P1HRL5|A0A2P1HRL5_HPV16 Probable protein E5 OS=Human papillomavirus type 16 OX=333760 GN=E5 PE=3 SV=1	7	ASTTLLACFLLCFCVLLCVCL
0.25	A0A2P1HVS4	tr|A0A2P1HVS4|A0A2P1HVS4_HPV16 Probable protein E5 OS=Human papillomavirus type 16 OX=333760 GN=E5 PE=3 SV=1	7	ASTTLLACFLLCFCVLLCVCL
0.25	A0A2P1HK73	tr|A0A2P1HK73|A0A2P1HK73_HPV16 Probable protein E5 OS=Human papillomavirus type 16 OX=333760 GN=E5 PE=3 SV=1	7	ASTTLLACFLLCFCVLLCVCL
0.25	J3XCH0	tr|J3XCH0|J3XCH0_HPV16 Probable protein E5 OS=Human papillomavirus type 16 OX=333760 GN=E5 PE=3 SV=1	7	ASTTLLACFLLCFCVLLCVCL
0.25	A0A2P1HHL8	tr|A0A2P1HHL8|A0A2P1HHL8_HPV16 Probable protein E5 OS=Human papillomavirus type 16 OX=333760 GN=E5 PE=3 SV=1	7	ASTTLLACFLLCFCVLLCVCL
0.25	A0A2P1IE01	tr|A0A2P1IE01|A0A2P1IE01_HPV16 Probable protein E5 OS=Human papillomavirus type 16 OX=333760 GN=E5 PE=3 SV=1	7	AYTTLLACFLLCFCVLLCVCL
0.25	Q77AC3	tr|Q77AC3|Q77AC3_HPV16 Probable protein E5 (Fragment) OS=Human papillomavirus type 16 OX=333760 GN=E5 PE=3 SV=1	8	CFLLCFCVLLCVCLLIRPLLL
0.25	A0A2P1HMY0	tr|A0A2P1HMY0|A0A2P1HMY0_HPV16 Probable protein E5 OS=Human papillomavirus type 16 OX=333760 GN=E5 PE=3 SV=1	7	ASTTLLACFLLCFCVLLCVCL
0.25	A0A2P1I9S8	tr|A0A2P1I9S8|A0A2P1I9S8_HPV16 Probable protein E5 OS=Human papillomavirus type 16 OX=333760 GN=E5 PE=3 SV=1	9	TTLLACFGLCFCVLLCVCLLI
0.25	A0A2P1IK18	tr|A0A2P1IK18|A0A2P1IK18_HPV16 Probable protein E5 OS=Human papillomavirus type 16 OX=333760 GN=E5 PE=3 SV=1	7	ASTTLLACFLLCFCVLLCVCL
0.25	Q77AA6	tr|Q77AA6|Q77AA6_HPV16 Probable protein E5 (Fragment) OS=Human papillomavirus type 16 OX=333760 GN=E5 PE=3 SV=1	8	CFLLCFCVLLCVCLLIRPLLL
0.25	Q77AC6	tr|Q77AC6|Q77AC6_HPV16 Probable protein E5 (Fragment) OS=Human papillomavirus type 16 OX=333760 GN=E5 PE=3 SV=1	8	CFLLCFCVLLCVCLLIRPLLL
0.25	A0A6H1X9D7	tr|A0A6H1X9D7|A0A6H1X9D7_9INFB Glycoprotein NB OS=Influenza B virus OX=11520 GN=NB PE=3 SV=1	46	RNNCTNNAIGLCKRIKCSCCE
0.25	Q9WIV7	tr|Q9WIV7|Q9WIV7_HPV16 Probable protein E5 (Fragment) OS=Human papillomavirus type 16 OX=333760 GN=E5 PE=3 SV=1	8	CFLLCFCVLLCVCLLIRPLLM
0.25	A0A6H0D0L1	tr|A0A6H0D0L1|A0A6H0D0L1_9INFB Glycoprotein NB OS=Influenza B virus OX=11520 GN=NB PE=3 SV=1	46	RNNCTNNAIGLCKRIKCSCCE
0.25	A0A0P0EFM4	tr|A0A0P0EFM4|A0A0P0EFM4_HPV53 Probable protein E5 (Fragment) OS=Human papillomavirus type 53 OX=333765 GN=E5 PE=3 SV=1	7	IVLCVSFVFLLCCFVCLFVCF
0.25	A0A2P1HQV8	tr|A0A2P1HQV8|A0A2P1HQV8_HPV16 Probable protein E5 OS=Human papillomavirus type 16 OX=333760 GN=E5 PE=3 SV=1	7	ASTTLLACFLLCFCVLLCVCL
0.25	A0A2P1IH77	tr|A0A2P1IH77|A0A2P1IH77_HPV16 Probable protein E5 OS=Human papillomavirus type 16 OX=333760 GN=E5 PE=3 SV=1	7	ASTTLLACFLLCFCVLLCVCL
0.25	A0A2P1HH82	tr|A0A2P1HH82|A0A2P1HH82_HPV16 Probable protein E5 OS=Human papillomavirus type 16 OX=333760 GN=E5 PE=3 SV=1	7	ASTTLLACFLLCFCVLLCVCL
0.25	A0A2P1HKJ4	tr|A0A2P1HKJ4|A0A2P1HKJ4_HPV16 Probable protein E5 OS=Human papillomavirus type 16 OX=333760 GN=E5 PE=3 SV=1	7	ASTTLLACFLLCFCVLLCVCL
0.25	A0A2P1HUX1	tr|A0A2P1HUX1|A0A2P1HUX1_HPV16 Probable protein E5 OS=Human papillomavirus type 16 OX=333760 GN=E5 PE=3 SV=1	7	ASTTLLACFLLCFCVLLCVCL
0.25	A0A2P1HXX1	tr|A0A2P1HXX1|A0A2P1HXX1_HPV16 Probable protein E5 OS=Human papillomavirus type 16 OX=333760 GN=E5 PE=3 SV=1	7	ASTTLLACFLLCFCVLLCVCL
0.25	A0A220NP70	tr|A0A220NP70|A0A220NP70_HPV16 Probable protein E5 OS=Human papillomavirus type 16 OX=333760 GN=E5 PE=3 SV=1	7	ASTTVLACFLLCFCVLLCVCL
0.25	A0A2P1HNJ8	tr|A0A2P1HNJ8|A0A2P1HNJ8_HPV16 Probable protein E5 OS=Human papillomavirus type 16 OX=333760 GN=E5 PE=3 SV=1	7	ASTTLLACFLLCFCVLLCVCL
0.25	A0A0P0EZQ8	tr|A0A0P0EZQ8|A0A0P0EZQ8_HPV53 Probable protein E5 (Fragment) OS=Human papillomavirus type 53 OX=333765 GN=E5 PE=3 SV=1	7	IVLCVSFVFLLCCFVCLFVCF
0.25	A0A4V1G8G3	tr|A0A4V1G8G3|A0A4V1G8G3_9INFB Glycoprotein NB OS=Influenza B virus OX=11520 GN=NB PE=3 SV=1	46	RNNCTNNAIGLCKHIKCSCCE
0.25	Q77AA1	tr|Q77AA1|Q77AA1_HPV16 Probable protein E5 (Fragment) OS=Human papillomavirus type 16 OX=333760 GN=E5 PE=3 SV=1	8	CFLLCFCVLLCVCLLIRPLLL
0.25	A0A2P1HPF0	tr|A0A2P1HPF0|A0A2P1HPF0_HPV16 Probable protein E5 OS=Human papillomavirus type 16 OX=333760 GN=E5 PE=3 SV=1	9	TTLLACFLLCFCVLLCVCLLI
0.25	A0A159DYJ9	tr|A0A159DYJ9|A0A159DYJ9_HPV16 Probable protein E5 OS=Human papillomavirus type 16 OX=333760 PE=3 SV=1	7	ASTTLLACFLLCFCVLLCVCL
0.25	A0A2P1HWQ3	tr|A0A2P1HWQ3|A0A2P1HWQ3_HPV16 Probable protein E5 OS=Human papillomavirus type 16 OX=333760 GN=E5 PE=3 SV=1	7	ASTTLLACFLLCFCVLLCVCL
0.25	A0A2P1I515	tr|A0A2P1I515|A0A2P1I515_HPV16 Probable protein E5 OS=Human papillomavirus type 16 OX=333760 GN=E5 PE=3 SV=1	7	ASTTLLACFLLCFCVLLCVCL
0.25	Q77AB6	tr|Q77AB6|Q77AB6_HPV16 Probable protein E5 (Fragment) OS=Human papillomavirus type 16 OX=333760 GN=E5 PE=3 SV=1	8	CFLLCFCVLLCVCLLIRPLLL
0.25	Q77AC4	tr|Q77AC4|Q77AC4_HPV16 Probable protein E5 (Fragment) OS=Human papillomavirus type 16 OX=333760 GN=E5 PE=3 SV=1	8	CFLLCFCVLLCVCLLIRPLLL
0.25	A0A2P1IA09	tr|A0A2P1IA09|A0A2P1IA09_HPV16 Probable protein E5 OS=Human papillomavirus type 16 OX=333760 GN=E5 PE=3 SV=1	7	ASTTLLACFLLCFCVLLCVCL
0.25	A0A2P1HCB4	tr|A0A2P1HCB4|A0A2P1HCB4_HPV16 Probable protein E5 OS=Human papillomavirus type 16 OX=333760 GN=E5 PE=3 SV=1	14	CFLLCFCVLLCVCLLIRPGGG
0.25	Q8B5P1	tr|Q8B5P1|Q8B5P1_HPV16 Probable protein E5 OS=Human papillomavirus type 16 OX=333760 GN=E5 PE=3 SV=1	7	TSTTLLACFLLCFCVLLCVCL
0.25	Q77AA4	tr|Q77AA4|Q77AA4_HPV16 Probable protein E5 (Fragment) OS=Human papillomavirus type 16 OX=333760 GN=E5 PE=3 SV=1	8	CFLLCFCVLLCVCLLIRPLLL
0.25	A0A2P1II02	tr|A0A2P1II02|A0A2P1II02_HPV16 Probable protein E5 OS=Human papillomavirus type 16 OX=333760 GN=E5 PE=3 SV=1	7	AYTTLLACFLLCFCVLLCVCL
0.25	A0A2P1I5T7	tr|A0A2P1I5T7|A0A2P1I5T7_HPV16 Probable protein E5 OS=Human papillomavirus type 16 OX=333760 GN=E5 PE=3 SV=1	14	CFLLCFCVLLCVCLLIRPLLG
0.25	Q9WIW1	tr|Q9WIW1|Q9WIW1_HPV16 Probable protein E5 (Fragment) OS=Human papillomavirus type 16 OX=333760 GN=E5 PE=3 SV=1	8	CFLLCFCVLLCVCLLIRPLLL
0.25	Q9WIV2	tr|Q9WIV2|Q9WIV2_HPV16 Probable protein E5 (Fragment) OS=Human papillomavirus type 16 OX=333760 GN=E5 PE=3 SV=1	8	CFLLCFCVLLCVCLLIRPLLL
0.25	A0A2P1I129	tr|A0A2P1I129|A0A2P1I129_HPV16 Probable protein E5 OS=Human papillomavirus type 16 OX=333760 GN=E5 PE=3 SV=1	7	AYTTLLACFLLCFCVLLCVCL
0.25	A0A2P1HVQ2	tr|A0A2P1HVQ2|A0A2P1HVQ2_HPV16 Probable protein E5 OS=Human papillomavirus type 16 OX=333760 GN=E5 PE=3 SV=1	7	ASTTLLACFLLCFCVLLCVCL
0.25	A0A2P1HGE3	tr|A0A2P1HGE3|A0A2P1HGE3_HPV16 Probable protein E5 OS=Human papillomavirus type 16 OX=333760 GN=E5 PE=3 SV=1	7	ASTTLLACFLLCFCVLLCVCL
0.25	A0A2P1I8E8	tr|A0A2P1I8E8|A0A2P1I8E8_HPV16 Probable protein E5 OS=Human papillomavirus type 16 OX=333760 GN=E5 PE=3 SV=1	7	ASTTLLACFLLCFCVLLCVCL
0.25	Q77AA9	tr|Q77AA9|Q77AA9_HPV16 Probable protein E5 (Fragment) OS=Human papillomavirus type 16 OX=333760 GN=E5 PE=3 SV=1	8	CFLLCFCVLLCVCLLIRPLLL
0.25	Q77AA2	tr|Q77AA2|Q77AA2_HPV16 Probable protein E5 (Fragment) OS=Human papillomavirus type 16 OX=333760 GN=E5 PE=3 SV=1	8	CFLLCFCVLLCVCLLIRPLLL
0.25	A0A2P1HCQ5	tr|A0A2P1HCQ5|A0A2P1HCQ5_HPV16 Probable protein E5 OS=Human papillomavirus type 16 OX=333760 GN=E5 PE=3 SV=1	7	ASTTLLACFLLCFCVLLCVCL
0.25	Q9WGD5	tr|Q9WGD5|Q9WGD5_HPV16 Probable protein E5 OS=Human papillomavirus type 16 OX=333760 GN=E5 PE=3 SV=1	7	PSTTLLACFLLCFCVLLCVCL
0.25	Q77AD5	tr|Q77AD5|Q77AD5_HPV16 Probable protein E5 (Fragment) OS=Human papillomavirus type 16 OX=333760 GN=E5 PE=3 SV=1	8	CFLLCFCVLLCVCLLIRPLLL
0.25	A0A0R8IEB8	tr|A0A0R8IEB8|A0A0R8IEB8_ORFV Uncharacterized protein OS=Orf virus OX=10258 GN=ORFV120 PE=4 SV=1	140	YKQGLCNCFCKMFPCCKELKD
0.25	A0A4Y5WLW7	tr|A0A4Y5WLW7|A0A4Y5WLW7_9INFB Glycoprotein NB OS=Influenza B virus OX=11520 GN=NB PE=3 SV=1	46	RNNCTNNAIGLCKCIKCSGCE
0.25	Q77AD0	tr|Q77AD0|Q77AD0_HPV16 Probable protein E5 (Fragment) OS=Human papillomavirus type 16 OX=333760 GN=E5 PE=3 SV=1	8	CFLLCFCVLLCVCLLIRPLLL
0.25	A0A2P1ID52	tr|A0A2P1ID52|A0A2P1ID52_HPV16 Probable protein E5 OS=Human papillomavirus type 16 OX=333760 GN=E5 PE=3 SV=1	7	ASTTLLACFLLCFCVLLCVCL
0.25	Q77AC1	tr|Q77AC1|Q77AC1_HPV16 Probable protein E5 (Fragment) OS=Human papillomavirus type 16 OX=333760 GN=E5 PE=3 SV=1	8	CFLLCFCVLLCVCLLIRPLLL
0.25	A0A2Z5ZNJ1	tr|A0A2Z5ZNJ1|A0A2Z5ZNJ1_HPV16 Probable protein E5 OS=Human papillomavirus type 16 OX=333760 GN=E5 PE=3 SV=1	9	TTLLACFLLCFCVLLCVCLLI
0.25	A0A2P1HGT2	tr|A0A2P1HGT2|A0A2P1HGT2_HPV16 Probable protein E5 OS=Human papillomavirus type 16 OX=333760 GN=E5 PE=3 SV=1	7	ASTTLLACFLLCFCVLLCVCL
0.25	A0A2P1I6H4	tr|A0A2P1I6H4|A0A2P1I6H4_HPV16 Probable protein E5 OS=Human papillomavirus type 16 OX=333760 GN=E5 PE=3 SV=1	14	CFLLCFCVLLCVCLLIRPLLG
0.25	Q77AC8	tr|Q77AC8|Q77AC8_HPV16 Probable protein E5 (Fragment) OS=Human papillomavirus type 16 OX=333760 GN=E5 PE=3 SV=1	8	CFLLCFCVLLCVCLLIRPLLL
0.25	Q77AB4	tr|Q77AB4|Q77AB4_HPV16 Probable protein E5 (Fragment) OS=Human papillomavirus type 16 OX=333760 GN=E5 PE=3 SV=1	8	CFLLCFCVLLCVCLLIRPLLL
0.25	A0A4D6TU07	tr|A0A4D6TU07|A0A4D6TU07_9INFB Glycoprotein NB OS=Influenza B virus OX=11520 GN=NB PE=3 SV=1	46	RSNCTNDAIGLCKRIKCPCCE
0.25	A0A2P1IBQ7	tr|A0A2P1IBQ7|A0A2P1IBQ7_HPV16 Probable protein E5 OS=Human papillomavirus type 16 OX=333760 GN=E5 PE=3 SV=1	7	ASTTLLACFLLCFCVLLCVCL
0.25	A0A2P1HN61	tr|A0A2P1HN61|A0A2P1HN61_HPV16 Probable protein E5 OS=Human papillomavirus type 16 OX=333760 GN=E5 PE=3 SV=1	7	ASTTLLACFLLCFCVLLCVCL
0.25	Q9WIW2	tr|Q9WIW2|Q9WIW2_HPV16 Probable protein E5 (Fragment) OS=Human papillomavirus type 16 OX=333760 GN=E5 PE=3 SV=1	3	TTLPACFLLCFCVLLCVCLLI
0.25	A0A2Z5ZNR4	tr|A0A2Z5ZNR4|A0A2Z5ZNR4_HPV16 Probable protein E5 OS=Human papillomavirus type 16 OX=333760 GN=E5 PE=3 SV=1	7	ASTTLLACFLLCFCVLLCVCL
0.25	Q9W9F2	tr|Q9W9F2|Q9W9F2_HPV16 Probable protein E5 (Fragment) OS=Human papillomavirus type 16 OX=333760 GN=E5 PE=3 SV=1	8	CFLLCFCVLLCVCLLIRPLLL
0.25	A0A2P1HD81	tr|A0A2P1HD81|A0A2P1HD81_HPV16 Probable protein E5 OS=Human papillomavirus type 16 OX=333760 GN=E5 PE=3 SV=1	7	ASTTLLACFLLCFCVLLCVCL
0.25	A0A2P1HFU9	tr|A0A2P1HFU9|A0A2P1HFU9_HPV16 Probable protein E5 OS=Human papillomavirus type 16 OX=333760 GN=E5 PE=3 SV=1	7	AFTTLLACFLLCFCVLLCVCL
0.25	A0A2P1HZ79	tr|A0A2P1HZ79|A0A2P1HZ79_HPV16 Probable protein E5 OS=Human papillomavirus type 16 OX=333760 GN=E5 PE=3 SV=1	9	TTLLACFLLCFCVLLCVCLLI
0.25	E1U5P8	tr|E1U5P8|E1U5P8_ADE06 Membrane glyco E3 CR1alpha0 OS=Human adenovirus C serotype 6 OX=10534 GN=E3 PE=4 SV=1	35	LCLRVAACCTHVCTYCQLFKR
0.25	A0A2P1HE71	tr|A0A2P1HE71|A0A2P1HE71_HPV16 Probable protein E5 OS=Human papillomavirus type 16 OX=333760 GN=E5 PE=3 SV=1	7	TSTTLLACFLLCFCVLLCVCL
0.25	A0A2P1HLG0	tr|A0A2P1HLG0|A0A2P1HLG0_HPV16 Probable protein E5 OS=Human papillomavirus type 16 OX=333760 GN=E5 PE=3 SV=1	7	ASTTLLACFLLCFCVLLCVCL
0.25	A0A2P1I7R8	tr|A0A2P1I7R8|A0A2P1I7R8_HPV16 Probable protein E5 OS=Human papillomavirus type 16 OX=333760 GN=E5 PE=3 SV=1	7	ASTTLLACFLLCFCVLLCVCL
0.25	A0A2P1IAG0	tr|A0A2P1IAG0|A0A2P1IAG0_HPV16 Probable protein E5 OS=Human papillomavirus type 16 OX=333760 GN=E5 PE=3 SV=1	7	ASTTLLACFLLCFCVLLCVCL
0.25	A0A2P1I1K2	tr|A0A2P1I1K2|A0A2P1I1K2_HPV16 Probable protein E5 OS=Human papillomavirus type 16 OX=333760 GN=E5 PE=3 SV=1	14	CFLLCFCVLLCVCLLIRPLLL
0.25	A0A2P1HRK0	tr|A0A2P1HRK0|A0A2P1HRK0_HPV16 Probable protein E5 OS=Human papillomavirus type 16 OX=333760 GN=E5 PE=3 SV=1	7	ASTTLLACFLLCFCVLLCVCL
0.25	A0A2P1I1N9	tr|A0A2P1I1N9|A0A2P1I1N9_HPV16 Probable protein E5 OS=Human papillomavirus type 16 OX=333760 GN=E5 PE=3 SV=1	7	ASTTLLACFLLCFCVLLCVCL
0.25	A0A2P1HVM1	tr|A0A2P1HVM1|A0A2P1HVM1_HPV16 Probable protein E5 OS=Human papillomavirus type 16 OX=333760 GN=E5 PE=3 SV=1	14	CFLLCFCVLLCVCLLIRPGGG
0.25	A0A2P1IC95	tr|A0A2P1IC95|A0A2P1IC95_HPV16 Probable protein E5 OS=Human papillomavirus type 16 OX=333760 GN=E5 PE=3 SV=1	7	ASTTLLACFLLCFCVLLCVCL
0.25	Q77AB2	tr|Q77AB2|Q77AB2_HPV16 Probable protein E5 (Fragment) OS=Human papillomavirus type 16 OX=333760 GN=E5 PE=3 SV=1	8	CFLLCFCVLLCVCLLIRPLLL
0.25	A0A2P1HD33	tr|A0A2P1HD33|A0A2P1HD33_HPV16 Probable protein E5 OS=Human papillomavirus type 16 OX=333760 GN=E5 PE=3 SV=1	7	ASTTLLACFLLCFCVLLCVCL
0.25	A0A2P1I956	tr|A0A2P1I956|A0A2P1I956_HPV16 Probable protein E5 OS=Human papillomavirus type 16 OX=333760 GN=E5 PE=3 SV=1	7	ASTTLLACFLLCFCVLLCVCL
0.25	A0A2P1HWU0	tr|A0A2P1HWU0|A0A2P1HWU0_HPV16 Probable protein E5 OS=Human papillomavirus type 16 OX=333760 GN=E5 PE=3 SV=1	7	ASTTLLACFLLCFCVLLCVCL
0.25	A0A2P1I619	tr|A0A2P1I619|A0A2P1I619_HPV16 Probable protein E5 OS=Human papillomavirus type 16 OX=333760 GN=E5 PE=3 SV=1	7	ASTTLLACFLLCFCVLLCVCL
0.25	Q9W8H7	tr|Q9W8H7|Q9W8H7_HPV16 Probable protein E5 (Fragment) OS=Human papillomavirus type 16 OX=333760 GN=E5 PE=3 SV=1	8	CFLLCFCVLLCVCLLIRPLLL
0.25	A0A2P1I4C0	tr|A0A2P1I4C0|A0A2P1I4C0_HPV16 Probable protein E5 OS=Human papillomavirus type 16 OX=333760 GN=E5 PE=3 SV=1	7	ASTTLLACFLLCFCVLLCVCL
0.25	Q77AB0	tr|Q77AB0|Q77AB0_HPV16 Probable protein E5 (Fragment) OS=Human papillomavirus type 16 OX=333760 GN=E5 PE=3 SV=1	8	CFLLCFCVLLCVCLLIRPLLL
0.25	Q910M3	sp|Q910M3|E3CR1_ADE02 Early 3 Conserved Region 1-alpha protein OS=Human adenovirus C serotype 2 OX=10515 PE=1 SV=1	35	LCLRVAACCTHVCTYCQLFKR
0.25	P06927	sp|P06927|VE5_HPV16 Probable protein E5 OS=Human papillomavirus type 16 OX=333760 GN=E5 PE=1 SV=2	12	LACFLLCFCVLLCVCLLIRPL
0.25	P0DOK0	sp|P0DOK0|POLSF_SINDV Frameshifted structural polyprotein OS=Sindbis virus OX=11034 PE=1 SV=1	784	MRCCSCCLPFLSGCRRLPGEG
0.25	Q8JUX5	sp|Q8JUX5|POLS_CHIKS Structural polyprotein OS=Chikungunya virus (strain S27-African prototype) OX=371094 PE=1 SV=3	772	IPLAALIVLCNCLRLLPCCCK
0.25	P0DOK1	sp|P0DOK1|POLSF_CHIKS Frameshifted structural polyprotein OS=Chikungunya virus (strain S27-African prototype) OX=371094 PE=1 SV=1	788	PCCCKTLAFLSRNEHRCPHCE
0.25	Q1HVJ2	sp|Q1HVJ2|LMP2_EBVA8 Latent membrane protein 2 OS=Epstein-Barr virus (strain AG876) OX=82830 GN=LMP2 PE=3 SV=1	470	IRCCRYCCYYCLTLESEERPP
0.25	P0C729	sp|P0C729|LMP2_EBVG Latent membrane protein 2 OS=Epstein-Barr virus (strain GD1) OX=10376 GN=LMP2 PE=3 SV=1	469	IRCCRYCCYYCLTLESEERPP
0.25	Q5WQY5	sp|Q5WQY5|POLS_CHIKN Structural polyprotein OS=Chikungunya virus (strain Nagpur) OX=371096 PE=3 SV=1	772	IPLAALIVLCNCLRLLPCCCK
0.25	A0A0C7T5J9	tr|A0A0C7T5J9|A0A0C7T5J9_EBVG K15 OS=Epstein-Barr virus (strain GD1) OX=10376 GN=LMP-2A PE=4 SV=1	470	IRCCRYCCYYCLTLESEERPP
0.25	A0A2D1LZJ2	tr|A0A2D1LZJ2|A0A2D1LZJ2_EBVG LMP2B protein OS=Epstein-Barr virus (strain GD1) OX=10376 PE=4 SV=1	351	IRCCRYCCYYCLTLESEERPP
0.25	A0A0C7TYD8	tr|A0A0C7TYD8|A0A0C7TYD8_EBVG K15 OS=Epstein-Barr virus (strain GD1) OX=10376 GN=LMP-2A PE=4 SV=1	470	IRCCRYCCYYCLTLESEERPP
0.25	E2ES79	tr|E2ES79|E2ES79_EBVG Latent membrane protein 2A (Fragment) OS=Epstein-Barr virus (strain GD1) OX=10376 GN=LMP2A PE=4 SV=1	351	IRCCRYCCYYCLTLESEERPP
0.25	E2ESC3	tr|E2ESC3|E2ESC3_EBVG Latent membrane protein 2A (Fragment) OS=Epstein-Barr virus (strain GD1) OX=10376 GN=LMP2A PE=4 SV=1	351	IRCCRYCCYYCLTLESEERPP
0.25	A0A0U3TYC8	tr|A0A0U3TYC8|A0A0U3TYC8_EBVG LMP-2B OS=Epstein-Barr virus (strain GD1) OX=10376 GN=LMP-2B PE=4 SV=1	351	IRCCRYCCYYCLTLESEERPP
0.25	A0A410J078	tr|A0A410J078|A0A410J078_EBVG LMP-2B OS=Epstein-Barr virus (strain GD1) OX=10376 GN=LMP-2B PE=4 SV=1	351	IRCCRYCCYYCLTLESEERPP
0.25	A0A0C7TUT4	tr|A0A0C7TUT4|A0A0C7TUT4_EBVG K15 OS=Epstein-Barr virus (strain GD1) OX=10376 GN=LMP-2A PE=4 SV=1	470	IRCCRYCCYYCLTLESEERPP
0.25	E2ESB7	tr|E2ESB7|E2ESB7_EBVG Latent membrane protein 2A (Fragment) OS=Epstein-Barr virus (strain GD1) OX=10376 GN=LMP2A PE=4 SV=1	351	IRCCRYCCYYCLTLESEERPP
0.25	E2ES31	tr|E2ES31|E2ES31_EBVG Latent membrane protein 2A (Fragment) OS=Epstein-Barr virus (strain GD1) OX=10376 GN=LMP2A PE=4 SV=1	351	IRCCRYCCYYCLTLESEERPP
0.25	E2ESB5	tr|E2ESB5|E2ESB5_EBVG Latent membrane protein 2A (Fragment) OS=Epstein-Barr virus (strain GD1) OX=10376 GN=LMP2A PE=4 SV=1	351	IRCCRYCCYYCLTLESEERPP
0.25	E2ES48	tr|E2ES48|E2ES48_EBVG Latent membrane protein 2A (Fragment) OS=Epstein-Barr virus (strain GD1) OX=10376 GN=LMP2A PE=4 SV=1	351	IRCCRYCCYYCLTLESEERPP
0.25	E2ES71	tr|E2ES71|E2ES71_EBVG Latent membrane protein 2A (Fragment) OS=Epstein-Barr virus (strain GD1) OX=10376 GN=LMP2A PE=4 SV=1	351	IRCCRYCCYYCLTLESEERPP
0.25	A0A3R5TV45	tr|A0A3R5TV45|A0A3R5TV45_EBVG LMP-2B OS=Epstein-Barr virus (strain GD1) OX=10376 GN=LMP-2B PE=4 SV=1	351	IRCCRYCCYYCLTLESEERPP
0.25	A0A410I012	tr|A0A410I012|A0A410I012_EBVG LMP-2B OS=Epstein-Barr virus (strain GD1) OX=10376 GN=LMP-2B PE=4 SV=1	351	IRCCRYCCYYCLTLESEERPP
0.25	E2ES76	tr|E2ES76|E2ES76_EBVG Latent membrane protein 2A (Fragment) OS=Epstein-Barr virus (strain GD1) OX=10376 GN=LMP2A PE=4 SV=1	351	IRCCRYCCYYCLTLESEERPP
0.25	E2ES87	tr|E2ES87|E2ES87_EBVG Latent membrane protein 2A (Fragment) OS=Epstein-Barr virus (strain GD1) OX=10376 GN=LMP2A PE=4 SV=1	351	IRCCRYCCYYCLTLESEERPP
0.25	A0A0C7TZ10	tr|A0A0C7TZ10|A0A0C7TZ10_EBVG LMP-2B OS=Epstein-Barr virus (strain GD1) OX=10376 GN=LMP-2B PE=4 SV=1	351	IRCCRYCCYYCLTLESEERPP
0.25	A0A6B9M6E3	tr|A0A6B9M6E3|A0A6B9M6E3_CHIKV Togavirin OS=Chikungunya virus OX=37124 PE=4 SV=1	772	IPLAALIVLCNCLRLLPCCCK
0.25	A0A090BT10	tr|A0A090BT10|A0A090BT10_CHIKV Togavirin OS=Chikungunya virus OX=37124 PE=4 SV=1	772	IPLAALIVLCNCLRLLPCCCK
0.25	A0A3R5WL04	tr|A0A3R5WL04|A0A3R5WL04_EBVG LMP-2B OS=Epstein-Barr virus (strain GD1) OX=10376 GN=LMP-2B PE=4 SV=1	351	IRCCRYCCHYCLTLESEERPP
0.25	A0A410IR53	tr|A0A410IR53|A0A410IR53_EBVG LMP-2B OS=Epstein-Barr virus (strain GD1) OX=10376 GN=LMP-2B PE=4 SV=1	352	IRCCRYCCYYCLTLESEERPP
0.25	E2ESA0	tr|E2ESA0|E2ESA0_EBVG Latent membrane protein 2A (Fragment) OS=Epstein-Barr virus (strain GD1) OX=10376 GN=LMP2A PE=4 SV=1	351	IRCCRYCCYYCLTLESEERPP
0.25	A0A0C7TLV7	tr|A0A0C7TLV7|A0A0C7TLV7_EBVG K15 OS=Epstein-Barr virus (strain GD1) OX=10376 GN=LMP-2A PE=4 SV=1	470	IRCCRYCCYYCLTLESEERPP
0.25	A0A0U2XIE7	tr|A0A0U2XIE7|A0A0U2XIE7_EBVG LMP-2A OS=Epstein-Barr virus (strain GD1) OX=10376 GN=LMP-2A PE=4 SV=1	470	IRCCRYCCYYCLTLESEERPP
0.25	A0A0U3SNR4	tr|A0A0U3SNR4|A0A0U3SNR4_EBVG LMP-2A OS=Epstein-Barr virus (strain GD1) OX=10376 GN=LMP-2A PE=4 SV=1	470	IRCCRYCCYYCLTLESEERPP
0.25	A0A410J1S1	tr|A0A410J1S1|A0A410J1S1_EBVG LMP-2B OS=Epstein-Barr virus (strain GD1) OX=10376 GN=LMP-2B PE=4 SV=1	351	IRCCRYCCYYCLTLESEERPP
0.25	A0A191T782	tr|A0A191T782|A0A191T782_EBVG Terminal protein LMP2B OS=Epstein-Barr virus (strain GD1) OX=10376 GN=LMP2B PE=4 SV=1	351	IRCCRYCCYYCLTLESEERPP
0.25	A0A292QAR1	tr|A0A292QAR1|A0A292QAR1_CHIKV Spike glycoprotein E2 (Fragment) OS=Chikungunya virus OX=37124 GN=E2-6k-E1 PE=4 SV=1	447	IPLAALIVLCNCLRLLPCCCK
0.25	A0A3R5T7B9	tr|A0A3R5T7B9|A0A3R5T7B9_CHIKV Togavirin OS=Chikungunya virus OX=37124 PE=4 SV=1	772	IPLAALIVLCNCLRLLPCCCK
0.25	A0A410ICP1	tr|A0A410ICP1|A0A410ICP1_EBVG LMP-2B OS=Epstein-Barr virus (strain GD1) OX=10376 GN=LMP-2B PE=4 SV=1	351	IRCCRYCCYYCLTLESEERPP
0.25	E2ES85	tr|E2ES85|E2ES85_EBVG Latent membrane protein 2A (Fragment) OS=Epstein-Barr virus (strain GD1) OX=10376 GN=LMP2A PE=4 SV=1	351	IRCCRYCCYYCLTLESEERPP
0.25	E2ESD1	tr|E2ESD1|E2ESD1_EBVG Latent membrane protein 2A (Fragment) OS=Epstein-Barr virus (strain GD1) OX=10376 GN=LMP2A PE=4 SV=1	351	IRCCRYCCYYCLTLESEERPP
0.25	A0A0U3B0L4	tr|A0A0U3B0L4|A0A0U3B0L4_EBVG LMP-2A OS=Epstein-Barr virus (strain GD1) OX=10376 GN=LMP-2A PE=4 SV=1	470	IRCCRYCCYYCLTLESEERPP
0.25	E2ES47	tr|E2ES47|E2ES47_EBVG Latent membrane protein 2A (Fragment) OS=Epstein-Barr virus (strain GD1) OX=10376 GN=LMP2A PE=4 SV=1	351	IRCCRYCCYYCLTLESEERPP
0.25	E2ESB1	tr|E2ESB1|E2ESB1_EBVG Latent membrane protein 2A (Fragment) OS=Epstein-Barr virus (strain GD1) OX=10376 GN=LMP2A PE=4 SV=1	351	IRCCRYCCYYCLTLESEERPP
0.25	A0A0C7T8B7	tr|A0A0C7T8B7|A0A0C7T8B7_EBVG K15 OS=Epstein-Barr virus (strain GD1) OX=10376 GN=LMP-2A PE=4 SV=1	470	IRCCRYCCYYCLTLESEERPP
0.25	A0A6B7H6S8	tr|A0A6B7H6S8|A0A6B7H6S8_CHIKV Togavirin OS=Chikungunya virus OX=37124 PE=4 SV=1	772	IPLAALIVLCNCLRLLPCCCK
0.25	D0U7D0	tr|D0U7D0|D0U7D0_CHIKV Togavirin OS=Chikungunya virus OX=37124 PE=4 SV=1	772	IPLAALIVLCNCLRLLPCCCK
0.25	D2CY35	tr|D2CY35|D2CY35_CHIKV Togavirin OS=Chikungunya virus OX=37124 PE=4 SV=1	772	IPLAALIVLCNCLRLLPCCCK
0.25	A0A221I1W1	tr|A0A221I1W1|A0A221I1W1_CHIKV Togavirin (Fragment) OS=Chikungunya virus OX=37124 PE=4 SV=1	772	IPLAALIVLCNCLRLLPCCCK
0.25	A0A0S2XIR9	tr|A0A0S2XIR9|A0A0S2XIR9_CHIKV Spike glycoprotein E2 (Fragment) OS=Chikungunya virus OX=37124 PE=4 SV=1	447	IPLAALIVLCNCLRLLPCCCK
0.25	H8XW53	tr|H8XW53|H8XW53_CHIKV Togavirin OS=Chikungunya virus OX=37124 PE=4 SV=1	772	IPLAALIVLCNCLRLLPCCCK
0.25	D3G8Q4	tr|D3G8Q4|D3G8Q4_CHIKV Togavirin OS=Chikungunya virus OX=37124 PE=4 SV=1	772	IPLAALIVLCNCLRLLPCCCK
0.25	A0A068BBA5	tr|A0A068BBA5|A0A068BBA5_CHIKV Togavirin OS=Chikungunya virus OX=37124 PE=4 SV=1	772	IPLAALIVLCNCLRLLPCCCK
0.25	A0A411HQY8	tr|A0A411HQY8|A0A411HQY8_CHIKV Togavirin (Fragment) OS=Chikungunya virus OX=37124 GN=SP PE=4 SV=1	772	IPLAALIVLCNCLRLLPCCCK
0.25	I6MCV9	tr|I6MCV9|I6MCV9_CHIKV Togavirin OS=Chikungunya virus OX=37124 PE=4 SV=1	772	IPLAALIVLCNCLRLLPCCCK
0.25	H8XW54	tr|H8XW54|H8XW54_CHIKV Togavirin OS=Chikungunya virus OX=37124 PE=4 SV=1	772	IPLAALIVLCNCLRLLPCCCK
0.25	A0A0S2XIR7	tr|A0A0S2XIR7|A0A0S2XIR7_CHIKV Spike glycoprotein E2 (Fragment) OS=Chikungunya virus OX=37124 PE=4 SV=1	447	IPLAALIVLCNCLRLLPCCCK
0.25	A0A0C7TZU9	tr|A0A0C7TZU9|A0A0C7TZU9_EBVG K15 OS=Epstein-Barr virus (strain GD1) OX=10376 GN=LMP-2A PE=4 SV=1	470	IRCCRYCCYYCLTLESEERPP
0.25	A0A0U3TMD6	tr|A0A0U3TMD6|A0A0U3TMD6_EBVG LMP-2A OS=Epstein-Barr virus (strain GD1) OX=10376 GN=LMP-2A PE=4 SV=1	470	IRCCRYCCYYCLTLESEERPP
0.25	E2ES42	tr|E2ES42|E2ES42_EBVG Latent membrane protein 2A (Fragment) OS=Epstein-Barr virus (strain GD1) OX=10376 GN=LMP2A PE=4 SV=1	351	IRCCRYCCYYCLTLESEERPP
0.25	A0A410I9T0	tr|A0A410I9T0|A0A410I9T0_EBVG LMP-2B OS=Epstein-Barr virus (strain GD1) OX=10376 GN=LMP-2B PE=4 SV=1	351	IRCCRYCCYYCLTLESEERPP
0.25	E2ES54	tr|E2ES54|E2ES54_EBVG Latent membrane protein 2A (Fragment) OS=Epstein-Barr virus (strain GD1) OX=10376 GN=LMP2A PE=4 SV=1	351	IRCCRYCCYYCLTLESEERPP
0.25	E2ESA9	tr|E2ESA9|E2ESA9_EBVG Latent membrane protein 2A (Fragment) OS=Epstein-Barr virus (strain GD1) OX=10376 GN=LMP2A PE=4 SV=1	351	IRCCRYCCYYCLTLESEERPP
0.25	E2ESC5	tr|E2ESC5|E2ESC5_EBVG Latent membrane protein 2A (Fragment) OS=Epstein-Barr virus (strain GD1) OX=10376 GN=LMP2A PE=4 SV=1	351	IRCCRYCCYYCLTLESEERPP
0.25	A0A410J010	tr|A0A410J010|A0A410J010_EBVG LMP-2B OS=Epstein-Barr virus (strain GD1) OX=10376 GN=LMP-2B PE=4 SV=1	351	IRCCRYCCYYCLTLESEERPP
0.25	A0A3R5XA18	tr|A0A3R5XA18|A0A3R5XA18_EBVG LMP-2B OS=Epstein-Barr virus (strain GD1) OX=10376 GN=LMP-2B PE=4 SV=1	351	IRCCRYCCYYCLTLESEERPP
0.25	A0A3R5VTI3	tr|A0A3R5VTI3|A0A3R5VTI3_EBVG LMP-2B OS=Epstein-Barr virus (strain GD1) OX=10376 GN=LMP-2B PE=4 SV=1	351	IRCCRYCCYYCLTLESEERPP
0.25	E2ES62	tr|E2ES62|E2ES62_EBVG Latent membrane protein 2A (Fragment) OS=Epstein-Barr virus (strain GD1) OX=10376 GN=LMP2A PE=4 SV=1	351	IRCCRYCCYYCLTLESEERPP
0.25	A0A410IPD1	tr|A0A410IPD1|A0A410IPD1_EBVG LMP-2B OS=Epstein-Barr virus (strain GD1) OX=10376 GN=LMP-2B PE=4 SV=1	351	IRCCRYCCYYCLTLESEERPP
0.25	A0A410HYZ0	tr|A0A410HYZ0|A0A410HYZ0_EBVG LMP-2B OS=Epstein-Barr virus (strain GD1) OX=10376 GN=LMP-2B PE=4 SV=1	351	IRCCRYCCYYCLTLESEERPP
0.25	A0A191T711	tr|A0A191T711|A0A191T711_EBVG Terminal protein LMP2B OS=Epstein-Barr virus (strain GD1) OX=10376 GN=LMP2B PE=4 SV=1	351	IRCCRYCCYYCLTLESEERPP
0.25	A0A410IFF6	tr|A0A410IFF6|A0A410IFF6_EBVG LMP-2B (Fragment) OS=Epstein-Barr virus (strain GD1) OX=10376 GN=LMP-2B PE=4 SV=1	126	IRCCRYCCYYCLTLESEERPP
0.25	A0A410IVS4	tr|A0A410IVS4|A0A410IVS4_EBVG LMP-2B OS=Epstein-Barr virus (strain GD1) OX=10376 GN=LMP-2B PE=4 SV=1	351	IRCCRYCCYYCLTLESEERPP
0.25	A0A0C7TSD2	tr|A0A0C7TSD2|A0A0C7TSD2_EBVG K15 OS=Epstein-Barr virus (strain GD1) OX=10376 GN=LMP-2A PE=4 SV=1	470	IRCCRYCCYYCLTLESEERPP
0.25	A0A0C7TVR5	tr|A0A0C7TVR5|A0A0C7TVR5_EBVG K15 OS=Epstein-Barr virus (strain GD1) OX=10376 GN=LMP-2A PE=4 SV=1	470	IRCCRYCCYYCLTLESEERPP
0.25	A0A286LLU5	tr|A0A286LLU5|A0A286LLU5_EBVG Terminal protein LMP2A OS=Epstein-Barr virus (strain GD1) OX=10376 GN=LMP2 PE=4 SV=1	470	IRCCRYCCYYCLTLESEERPP
0.25	A0A0U3UJT3	tr|A0A0U3UJT3|A0A0U3UJT3_EBVG LMP-2B OS=Epstein-Barr virus (strain GD1) OX=10376 GN=LMP-2B PE=4 SV=1	351	IRCCRYCCYYCLTLESEERPP
0.25	E2ES94	tr|E2ES94|E2ES94_EBVG Latent membrane protein 2A (Fragment) OS=Epstein-Barr virus (strain GD1) OX=10376 GN=LMP2A PE=4 SV=1	351	IRCCRYCCYYCLTLESEERPP
0.25	A0A385L3W6	tr|A0A385L3W6|A0A385L3W6_CHIKV Togavirin OS=Chikungunya virus OX=37124 PE=4 SV=1	772	IPLAALIVLCNCLRLLPCCCK
0.25	D2KBQ0	tr|D2KBQ0|D2KBQ0_CHIKV Togavirin OS=Chikungunya virus OX=37124 PE=4 SV=1	772	IPLAALIILCNCLRLLPCCCK
0.25	E2ESD5	tr|E2ESD5|E2ESD5_EBVG Latent membrane protein 2A (Fragment) OS=Epstein-Barr virus (strain GD1) OX=10376 GN=LMP2A PE=4 SV=1	351	IRCCRYCCYYCLTLESEERPP
0.25	A0A6B9LVH3	tr|A0A6B9LVH3|A0A6B9LVH3_CHIKV Togavirin OS=Chikungunya virus OX=37124 PE=4 SV=1	772	IPLAALIVLCNCLRLLPCCCK
0.25	A0A0S2XIR4	tr|A0A0S2XIR4|A0A0S2XIR4_CHIKV Spike glycoprotein E2 (Fragment) OS=Chikungunya virus OX=37124 PE=4 SV=1	447	IPLAALIVLCNCLRLLPCCCK
0.25	A0A411HQU8	tr|A0A411HQU8|A0A411HQU8_CHIKV Togavirin (Fragment) OS=Chikungunya virus OX=37124 GN=SP PE=4 SV=1	772	IPLAALIVLCNCLRLLPCCCK
0.25	A0A088CEV2	tr|A0A088CEV2|A0A088CEV2_CHIKV Togavirin OS=Chikungunya virus OX=37124 PE=4 SV=1	772	IPLAALIVLCNCLRLLPCCCK
0.25	A0A3R5X0G1	tr|A0A3R5X0G1|A0A3R5X0G1_EBVG LMP-2B OS=Epstein-Barr virus (strain GD1) OX=10376 GN=LMP-2B PE=4 SV=1	351	IRCCRYCCYYCLTLESEERPP
0.25	E2ES55	tr|E2ES55|E2ES55_EBVG Latent membrane protein 2A (Fragment) OS=Epstein-Barr virus (strain GD1) OX=10376 GN=LMP2A PE=4 SV=1	351	IRCCRYCCYYCLTLESEERPP
0.25	A0A3R5TQU6	tr|A0A3R5TQU6|A0A3R5TQU6_EBVG LMP-2B OS=Epstein-Barr virus (strain GD1) OX=10376 GN=LMP-2B PE=4 SV=1	351	IRCCRYCCYYCLTLESEERPP
0.25	A0A482DFP9	tr|A0A482DFP9|A0A482DFP9_EBVG LMP-2A protein OS=Epstein-Barr virus (strain GD1) OX=10376 PE=4 SV=1	470	IRCCRYCCYYCLTLESEERPP
0.25	E2ESA5	tr|E2ESA5|E2ESA5_EBVG Latent membrane protein 2A (Fragment) OS=Epstein-Barr virus (strain GD1) OX=10376 GN=LMP2A PE=4 SV=1	351	IRCCRYCCYYCLTLESEERPP
0.25	A0A2D1LZ40	tr|A0A2D1LZ40|A0A2D1LZ40_EBVG K15 protein OS=Epstein-Barr virus (strain GD1) OX=10376 GN=LMP-2A PE=4 SV=1	470	IRCCRYCCYYCLTLESEERPP
0.25	A0A0C7TW81	tr|A0A0C7TW81|A0A0C7TW81_EBVG K15 OS=Epstein-Barr virus (strain GD1) OX=10376 GN=LMP-2A PE=4 SV=1	470	IRCCRYCCYYCLTLESEERPP
0.25	E2ESC0	tr|E2ESC0|E2ESC0_EBVG Latent membrane protein 2A (Fragment) OS=Epstein-Barr virus (strain GD1) OX=10376 GN=LMP2A PE=4 SV=1	351	IRCCRYCCYYCLTLESEERPP
0.25	E2ESD3	tr|E2ESD3|E2ESD3_EBVG Latent membrane protein 2A (Fragment) OS=Epstein-Barr virus (strain GD1) OX=10376 GN=LMP2A PE=4 SV=1	351	IRCCRYCCYYCLTLESEERPP
0.25	E2ESA8	tr|E2ESA8|E2ESA8_EBVG Latent membrane protein 2A (Fragment) OS=Epstein-Barr virus (strain GD1) OX=10376 GN=LMP2A PE=4 SV=1	351	IRCCRYCCYYCLTLESEERPP
0.25	E2ESA4	tr|E2ESA4|E2ESA4_EBVG Latent membrane protein 2A (Fragment) OS=Epstein-Barr virus (strain GD1) OX=10376 GN=LMP2A PE=4 SV=1	351	IRCCRYCCYYCLTLESEERPP
0.25	E2ES72	tr|E2ES72|E2ES72_EBVG Latent membrane protein 2A (Fragment) OS=Epstein-Barr virus (strain GD1) OX=10376 GN=LMP2A PE=4 SV=1	351	IRCCRYCCYYCLTLESEERPP
0.25	E2ES35	tr|E2ES35|E2ES35_EBVG Latent membrane protein 2A (Fragment) OS=Epstein-Barr virus (strain GD1) OX=10376 GN=LMP2A PE=4 SV=1	351	IRCCRYCCYYCLTLESEERPP
0.25	E2ES81	tr|E2ES81|E2ES81_EBVG Latent membrane protein 2A (Fragment) OS=Epstein-Barr virus (strain GD1) OX=10376 GN=LMP2A PE=4 SV=1	351	IRCCRYCCYYCLTLESEERPP
0.25	A0A0C7TLS9	tr|A0A0C7TLS9|A0A0C7TLS9_EBVG LMP-2B OS=Epstein-Barr virus (strain GD1) OX=10376 GN=LMP-2B PE=4 SV=1	351	IRCCRYCCYYCLTLESEERPP
0.25	E2ESD4	tr|E2ESD4|E2ESD4_EBVG Latent membrane protein 2A (Fragment) OS=Epstein-Barr virus (strain GD1) OX=10376 GN=LMP2A PE=4 SV=1	351	IRCCRYCCYYCLTLESEERPP
0.25	A0A6B9QPT6	tr|A0A6B9QPT6|A0A6B9QPT6_CHIKV Togavirin OS=Chikungunya virus OX=37124 PE=4 SV=1	772	IPLAALIVLCNCLRLLPCCCK
0.25	A0A648EKS5	tr|A0A648EKS5|A0A648EKS5_CHIKV Capsid protein (Fragment) OS=Chikungunya virus OX=37124 PE=4 SV=1	725	IPLAALIVLCNCLRLLPCCCK
0.25	A0A1V0EQX3	tr|A0A1V0EQX3|A0A1V0EQX3_CHIKV Togavirin OS=Chikungunya virus OX=37124 GN=gp3 PE=4 SV=1	788	PCCCKMLTFLAVLSRRCPHCE
0.25	A0A4D6GTC3	tr|A0A4D6GTC3|A0A4D6GTC3_CHIKV Togavirin OS=Chikungunya virus OX=37124 PE=4 SV=1	772	IPLAALIVLCNCLRLLPCCCK
0.25	D0U7D6	tr|D0U7D6|D0U7D6_CHIKV Togavirin OS=Chikungunya virus OX=37124 PE=4 SV=1	772	IPLAALIVLCNCLRLLPCCCK
0.25	A0A221S5V3	tr|A0A221S5V3|A0A221S5V3_CHIKV E1 (Fragment) OS=Chikungunya virus OX=37124 PE=4 SV=1	106	IPLAALIVLCNCLRLLPCCCK
0.25	A6MH15	tr|A6MH15|A6MH15_CHIKV Togavirin OS=Chikungunya virus OX=37124 PE=4 SV=1	772	IPLAALIVLCNCLRLLPCCCK
0.25	A0A510C2W3	tr|A0A510C2W3|A0A510C2W3_CHIKV Togavirin OS=Chikungunya virus OX=37124 GN=SP PE=4 SV=1	772	IPLAALIVLCNCLRLLPCCCK
0.25	A0A344MND4	tr|A0A344MND4|A0A344MND4_CHIKV Structural polyprotein (Fragment) OS=Chikungunya virus OX=37124 PE=4 SV=1	247	IPLAALIVLCNCLRLLPCCCK
0.25	E2ES39	tr|E2ES39|E2ES39_EBVG Latent membrane protein 2A (Fragment) OS=Epstein-Barr virus (strain GD1) OX=10376 GN=LMP2A PE=4 SV=1	351	IRCCRYCCYYCLTLESEERPP
0.25	A0A5B9TED4	tr|A0A5B9TED4|A0A5B9TED4_CHIKV Togavirin OS=Chikungunya virus OX=37124 PE=4 SV=1	772	IPLAALIVLCNCLRLLPCCCK
0.25	A0A0S2XIR0	tr|A0A0S2XIR0|A0A0S2XIR0_CHIKV Togavirin OS=Chikungunya virus OX=37124 PE=4 SV=1	772	IPLAALIVLCNCLRLLPCCCK
0.25	A0A090BQH5	tr|A0A090BQH5|A0A090BQH5_CHIKV Togavirin OS=Chikungunya virus OX=37124 PE=4 SV=1	772	IPLAALIVLCNCLRLLPCCCK
0.25	D7R927	tr|D7R927|D7R927_CHIKV Togavirin OS=Chikungunya virus OX=37124 GN=CHIKVgp2 PE=4 SV=1	772	IPLAALIVLCNCLRLLPCCCK
0.25	E2ESB9	tr|E2ESB9|E2ESB9_EBVG Latent membrane protein 2A (Fragment) OS=Epstein-Barr virus (strain GD1) OX=10376 GN=LMP2A PE=4 SV=1	351	IRCCRYCCYYCLTLESEERPP
0.25	A0A410ITF8	tr|A0A410ITF8|A0A410ITF8_EBVG LMP-2B OS=Epstein-Barr virus (strain GD1) OX=10376 GN=LMP-2B PE=4 SV=1	351	IRCCRYCCYYCLTLESEERPP
0.25	A0A0C7T320	tr|A0A0C7T320|A0A0C7T320_EBVG K15 OS=Epstein-Barr virus (strain GD1) OX=10376 GN=LMP-2A PE=4 SV=1	470	IRCCRYCCYYCLTLESEERPP
0.25	A0A2D1LZJ7	tr|A0A2D1LZJ7|A0A2D1LZJ7_EBVG LMP2A protein OS=Epstein-Barr virus (strain GD1) OX=10376 PE=4 SV=1	470	IRCCRYCCYYCLTLESEERPP
0.25	A0A3R5U7V9	tr|A0A3R5U7V9|A0A3R5U7V9_EBVG LMP-2B OS=Epstein-Barr virus (strain GD1) OX=10376 GN=LMP-2B PE=4 SV=1	351	IRCCRYCCYYCLTLESEERPP
0.25	A0A410IHN2	tr|A0A410IHN2|A0A410IHN2_EBVG LMP-2B OS=Epstein-Barr virus (strain GD1) OX=10376 GN=LMP-2B PE=4 SV=1	351	IRCCRYCCYYCLTLESEERPP
0.25	A0A191T791	tr|A0A191T791|A0A191T791_EBVG Terminal protein LMP2A OS=Epstein-Barr virus (strain GD1) OX=10376 GN=LMP2A PE=4 SV=1	470	IRCCRYCCYYCLTLESEERPP
0.25	A0A1I7PCZ6	tr|A0A1I7PCZ6|A0A1I7PCZ6_CHIKV Togavirin OS=Chikungunya virus OX=37124 GN=gp3 PE=4 SV=1	788	PCCCKTLTFLAALSRRCPHCE
0.25	A0A1V0EQT9	tr|A0A1V0EQT9|A0A1V0EQT9_CHIKV Togavirin OS=Chikungunya virus OX=37124 GN=gp3 PE=4 SV=1	788	PCCCKMLTFLAVLSRRCPHCE
0.25	A0A292QBM2	tr|A0A292QBM2|A0A292QBM2_CHIKV Spike glycoprotein E2 (Fragment) OS=Chikungunya virus OX=37124 GN=E2-6k-E1 PE=4 SV=1	447	IPLAALIVLCNCLRLLPCCCK
0.25	D2DEJ4	tr|D2DEJ4|D2DEJ4_CHIKV Togavirin OS=Chikungunya virus OX=37124 PE=4 SV=1	772	IPLAALIVLCNCLRLLPCCCK
0.25	H2ETA8	tr|H2ETA8|H2ETA8_CHIKV Togavirin OS=Chikungunya virus OX=37124 PE=4 SV=1	772	IPLAALIVLCNCLRLLPCCCK
0.25	A0A6B9QRK0	tr|A0A6B9QRK0|A0A6B9QRK0_CHIKV Togavirin OS=Chikungunya virus OX=37124 PE=4 SV=1	772	IPLAALIVLCNCLRLLPCCCK
0.25	A0A0C7TLW5	tr|A0A0C7TLW5|A0A0C7TLW5_EBVG K15 OS=Epstein-Barr virus (strain GD1) OX=10376 GN=LMP-2A PE=4 SV=1	470	IRCCRYCCYYCLTLESEERPP
0.25	A0A2Z5T1C1	tr|A0A2Z5T1C1|A0A2Z5T1C1_CHIKV Togavirin OS=Chikungunya virus OX=37124 PE=4 SV=1	772	IPLAALIVLCNCLRLLPCCCK
0.25	A0A0S2XIS4	tr|A0A0S2XIS4|A0A0S2XIS4_CHIKV Spike glycoprotein E2 (Fragment) OS=Chikungunya virus OX=37124 PE=4 SV=1	447	IPLAALIVLCNCLRLLPCCCK
0.25	E2ES49	tr|E2ES49|E2ES49_EBVG Latent membrane protein 2A (Fragment) OS=Epstein-Barr virus (strain GD1) OX=10376 GN=LMP2A PE=4 SV=1	351	IRCCRYCCYYCLTLESEERPP
0.25	E2ES34	tr|E2ES34|E2ES34_EBVG Latent membrane protein 2A (Fragment) OS=Epstein-Barr virus (strain GD1) OX=10376 GN=LMP2A PE=4 SV=1	351	IRCCRYCCYYCLTLESEERPP
0.25	E2ES82	tr|E2ES82|E2ES82_EBVG Latent membrane protein 2A (Fragment) OS=Epstein-Barr virus (strain GD1) OX=10376 GN=LMP2A PE=4 SV=1	351	IRCCRYCCYYCLTLESEERPP
0.25	A0A191T702	tr|A0A191T702|A0A191T702_EBVG Terminal protein LMP2A OS=Epstein-Barr virus (strain GD1) OX=10376 GN=LMP2A PE=4 SV=1	470	IRCCRYCCYYCLTLESEERPP
0.25	E2ESD2	tr|E2ESD2|E2ESD2_EBVG Latent membrane protein 2A (Fragment) OS=Epstein-Barr virus (strain GD1) OX=10376 GN=LMP2A PE=4 SV=1	351	IRCCRYCCYYCLTLESEERPP
0.25	E2ES40	tr|E2ES40|E2ES40_EBVG Latent membrane protein 2A (Fragment) OS=Epstein-Barr virus (strain GD1) OX=10376 GN=LMP2A PE=4 SV=1	351	IRCCRYCCYYCLTLESEERPP
0.25	Q69135	tr|Q69135|Q69135_EBVG Latent membrane protein 2 (Fragment) OS=Epstein-Barr virus (strain GD1) OX=10376 GN=LMP 2 PE=2 SV=1	338	IRCCRYCCYYCLTLESEERPP
0.25	A0A0C7TE24	tr|A0A0C7TE24|A0A0C7TE24_EBVG LMP-2B OS=Epstein-Barr virus (strain GD1) OX=10376 GN=LMP-2B PE=4 SV=1	351	IRCCRYCCYYCLTLESEERPP
0.25	A0A1V0EPI9	tr|A0A1V0EPI9|A0A1V0EPI9_CHIKV Togavirin OS=Chikungunya virus OX=37124 GN=gp3 PE=4 SV=1	788	PCCCKMLTFLAVLSRRCPHCE
0.25	A0A1U9VWZ0	tr|A0A1U9VWZ0|A0A1U9VWZ0_CHIKV Togavirin OS=Chikungunya virus OX=37124 GN=SP PE=4 SV=1	772	IPLAALIVLCNCLRLLPCCCK
0.25	D0U7D4	tr|D0U7D4|D0U7D4_CHIKV Togavirin OS=Chikungunya virus OX=37124 PE=4 SV=1	772	IPLAALIVLCNCLRLLPCCCK
0.25	A0A6B7H901	tr|A0A6B7H901|A0A6B7H901_CHIKV Togavirin OS=Chikungunya virus OX=37124 PE=4 SV=1	772	IPLAALIVLCNCLRLLPCCCK
0.25	A0A6B9KPI7	tr|A0A6B9KPI7|A0A6B9KPI7_CHIKV Togavirin OS=Chikungunya virus OX=37124 PE=4 SV=1	772	IPLAALIVLCNCLRLLPCCCK
0.25	D7R943	tr|D7R943|D7R943_CHIKV Togavirin OS=Chikungunya virus OX=37124 GN=CHIKVgp2 PE=4 SV=1	772	IPLAALIVLCNCLRLLPCCCK
0.25	E2ES61	tr|E2ES61|E2ES61_EBVG Latent membrane protein 2A (Fragment) OS=Epstein-Barr virus (strain GD1) OX=10376 GN=LMP2A PE=4 SV=1	351	IRCCRYCCYYCLTLESEERPP
0.25	A0A0C4KN75	tr|A0A0C4KN75|A0A0C4KN75_CHIKV Togavirin OS=Chikungunya virus OX=37124 PE=4 SV=1	772	IPLAALIVLCNCLRLLPCCCK
0.25	A0A1V0EQH8	tr|A0A1V0EQH8|A0A1V0EQH8_CHIKV Togavirin OS=Chikungunya virus OX=37124 GN=gp3 PE=4 SV=1	788	PCCCKMLTFLAVLSRRCPHCE
0.25	A0A2I7YVG3	tr|A0A2I7YVG3|A0A2I7YVG3_CHIKV Togavirin OS=Chikungunya virus OX=37124 PE=4 SV=1	772	IPLAALIVLCNCLRLLPCCCK
0.25	D7R994	tr|D7R994|D7R994_CHIKV Togavirin OS=Chikungunya virus OX=37124 GN=CHIKVgp2 PE=4 SV=1	772	IPLAALIVLCNCLKLLPCCCK
0.25	A0A1V0EQZ7	tr|A0A1V0EQZ7|A0A1V0EQZ7_CHIKV Togavirin OS=Chikungunya virus OX=37124 GN=gp3 PE=4 SV=1	788	PCCCKMLTFLAVLSRRCPHCE
0.25	A0A0S2XIS3	tr|A0A0S2XIS3|A0A0S2XIS3_CHIKV Spike glycoprotein E2 (Fragment) OS=Chikungunya virus OX=37124 PE=4 SV=1	447	IPLAALIVLCNCLRLLPCCCK
0.25	D7R965	tr|D7R965|D7R965_CHIKV Togavirin OS=Chikungunya virus OX=37124 GN=CHIKVgp2 PE=4 SV=1	772	IPLAALIVLCNCLKLLPCCCK
0.25	A0A292Q9Z8	tr|A0A292Q9Z8|A0A292Q9Z8_CHIKV Spike glycoprotein E2 (Fragment) OS=Chikungunya virus OX=37124 GN=E2-6k-E1 PE=4 SV=1	447	IPLAALIVLCNCLRLLPCCCK
0.25	A0A0C7TWQ8	tr|A0A0C7TWQ8|A0A0C7TWQ8_EBVG LMP-2B OS=Epstein-Barr virus (strain GD1) OX=10376 GN=LMP-2B PE=4 SV=1	351	IRCCRYCCYYCLTLESEERPP
0.25	E2ESA3	tr|E2ESA3|E2ESA3_EBVG Latent membrane protein 2A (Fragment) OS=Epstein-Barr virus (strain GD1) OX=10376 GN=LMP2A PE=4 SV=1	351	IRCCRYCCYYCLTLESEERPP
0.25	A0A1V0EPL3	tr|A0A1V0EPL3|A0A1V0EPL3_CHIKV Togavirin OS=Chikungunya virus OX=37124 GN=gp3 PE=4 SV=1	788	PCCCKMLTFLAVLSRRCPHCE
0.25	G0LWX4	tr|G0LWX4|G0LWX4_CHIKV Spike glycoprotein E2 (Fragment) OS=Chikungunya virus OX=37124 GN=E2-6K-E1 PE=4 SV=1	447	IPLAALIVLCNCLRLLPCCCK
0.25	A0A411HQZ2	tr|A0A411HQZ2|A0A411HQZ2_CHIKV Togavirin OS=Chikungunya virus OX=37124 GN=SP PE=4 SV=1	772	IPLAALIVLCNCLRLLPCCCK
0.25	A0A0D5MBH6	tr|A0A0D5MBH6|A0A0D5MBH6_CHIKV Togavirin OS=Chikungunya virus OX=37124 PE=4 SV=1	772	IPLAALIVLCNCLRLLPCCCK
0.25	H2ETB6	tr|H2ETB6|H2ETB6_CHIKV Togavirin (Fragment) OS=Chikungunya virus OX=37124 PE=4 SV=1	772	IPLAALIVLCNCLRLLPCCCK
0.25	C8YZ73	tr|C8YZ73|C8YZ73_CHIKV Togavirin OS=Chikungunya virus OX=37124 PE=1 SV=1	772	IPLAALIVLCNCLRLLPCCCK
0.25	A0A1V0EPL5	tr|A0A1V0EPL5|A0A1V0EPL5_CHIKV Togavirin OS=Chikungunya virus OX=37124 GN=gp3 PE=4 SV=1	788	PCCCKMLTFLAVLSRRCPHCE
0.25	A0A6B7H7F9	tr|A0A6B7H7F9|A0A6B7H7F9_CHIKV Togavirin OS=Chikungunya virus OX=37124 PE=4 SV=1	772	IPLAALIVLCNCLRLLPCCCK
0.25	A0A2D1LYV3	tr|A0A2D1LYV3|A0A2D1LYV3_EBVG LMP2B protein OS=Epstein-Barr virus (strain GD1) OX=10376 GN=LMP-2B PE=4 SV=1	351	IRCCRYCCYYCLTLESEERPP
0.25	E2ES77	tr|E2ES77|E2ES77_EBVG Latent membrane protein 2A (Fragment) OS=Epstein-Barr virus (strain GD1) OX=10376 GN=LMP2A PE=4 SV=1	351	IRCCRYCCYYCLTLESEERPP
0.25	A0A221I1J1	tr|A0A221I1J1|A0A221I1J1_CHIKV Togavirin (Fragment) OS=Chikungunya virus OX=37124 PE=4 SV=1	772	IPLAALIVLCNCLRLLPCCCK
0.25	A0A1V0EQ14	tr|A0A1V0EQ14|A0A1V0EQ14_CHIKV Togavirin OS=Chikungunya virus OX=37124 GN=gp3 PE=4 SV=1	788	PCCCKMLTFLAVLSRRCPHCE
0.25	A0A648EMZ3	tr|A0A648EMZ3|A0A648EMZ3_CHIKV Capsid protein (Fragment) OS=Chikungunya virus OX=37124 PE=4 SV=1	772	IPLAALIVLCNCLRLLPCCCK
0.25	A0A0S2XIS1	tr|A0A0S2XIS1|A0A0S2XIS1_CHIKV Spike glycoprotein E2 (Fragment) OS=Chikungunya virus OX=37124 PE=4 SV=1	447	IPLAALIVLCNCLRLLPCCCK
0.25	E2ES73	tr|E2ES73|E2ES73_EBVG Latent membrane protein 2A (Fragment) OS=Epstein-Barr virus (strain GD1) OX=10376 GN=LMP2A PE=4 SV=1	351	IRCCRYCCYYCLTLESEERPP
0.25	A0A0C7TM82	tr|A0A0C7TM82|A0A0C7TM82_EBVG K15 OS=Epstein-Barr virus (strain GD1) OX=10376 GN=LMP-2A PE=4 SV=1	470	IRCCRYCCYYCLTLESEERPP
0.25	E2ES46	tr|E2ES46|E2ES46_EBVG Latent membrane protein 2A (Fragment) OS=Epstein-Barr virus (strain GD1) OX=10376 GN=LMP2A PE=4 SV=1	351	IRCCRYCCYYCLTLESEERPP
0.25	A0A0C7T8J3	tr|A0A0C7T8J3|A0A0C7T8J3_EBVG K15 OS=Epstein-Barr virus (strain GD1) OX=10376 GN=LMP-2A PE=4 SV=1	470	IRCCRYCCYYCLTLESEERPP
0.25	A0A410I266	tr|A0A410I266|A0A410I266_EBVG LMP-2B OS=Epstein-Barr virus (strain GD1) OX=10376 GN=LMP-2B PE=4 SV=1	351	IRCCRYCCYYCLTLESEERPP
0.25	A0A4D6GP95	tr|A0A4D6GP95|A0A4D6GP95_CHIKV Togavirin OS=Chikungunya virus OX=37124 PE=4 SV=1	772	IPLAALIVLCNCLRLLPCCCK
0.25	A0A292QBZ2	tr|A0A292QBZ2|A0A292QBZ2_CHIKV Spike glycoprotein E2 (Fragment) OS=Chikungunya virus OX=37124 GN=E2-6k-E1 PE=4 SV=1	447	IPLAALIVLCNCLRLLPCCCK
0.25	A0A4D6GTA5	tr|A0A4D6GTA5|A0A4D6GTA5_CHIKV Togavirin OS=Chikungunya virus OX=37124 PE=4 SV=1	772	IPLAALIVLCNCLRLLPCCCK
0.25	A0A1I7PD13	tr|A0A1I7PD13|A0A1I7PD13_CHIKV Togavirin OS=Chikungunya virus OX=37124 GN=SP PE=4 SV=1	772	IPLAALIVLCNCLRLLPCCCK
0.25	A0A4P8W5C0	tr|A0A4P8W5C0|A0A4P8W5C0_CHIKV Togavirin OS=Chikungunya virus OX=37124 PE=4 SV=1	772	IPLAALIVLCNCLRLLPCCCK
0.25	A0A0S2XIV0	tr|A0A0S2XIV0|A0A0S2XIV0_CHIKV Spike glycoprotein E2 (Fragment) OS=Chikungunya virus OX=37124 PE=4 SV=1	447	IPLAALIVLCNCLRLLPCCCK
0.25	A0A286LM18	tr|A0A286LM18|A0A286LM18_EBVG Terminal protein LMP2A OS=Epstein-Barr virus (strain GD1) OX=10376 GN=LMP2 PE=4 SV=1	470	IRCCRYCCYYCLTLESEERPP
0.25	E2ESB8	tr|E2ESB8|E2ESB8_EBVG Latent membrane protein 2A (Fragment) OS=Epstein-Barr virus (strain GD1) OX=10376 GN=LMP2A PE=4 SV=1	351	IRCCRYCCYYCLTLESEERPP
0.25	E2ES67	tr|E2ES67|E2ES67_EBVG Latent membrane protein 2A (Fragment) OS=Epstein-Barr virus (strain GD1) OX=10376 GN=LMP2A PE=4 SV=1	351	IRCCRYCCYYCLTLESEERPP
0.25	A0A0C7SYT8	tr|A0A0C7SYT8|A0A0C7SYT8_EBVG LMP-2B OS=Epstein-Barr virus (strain GD1) OX=10376 GN=LMP-2B PE=4 SV=1	351	IRCCRYCCYYCLTLESEERPP
0.25	E2ES30	tr|E2ES30|E2ES30_EBVG Latent membrane protein 2A (Fragment) OS=Epstein-Barr virus (strain GD1) OX=10376 GN=LMP2A PE=4 SV=1	351	IRCCRYCCYYCLTLESEERPP
0.25	E2ES89	tr|E2ES89|E2ES89_EBVG Latent membrane protein 2A (Fragment) OS=Epstein-Barr virus (strain GD1) OX=10376 GN=LMP2A PE=4 SV=1	351	IRCCRYCCYYCLTLESEERPP
0.25	E2ES90	tr|E2ES90|E2ES90_EBVG Latent membrane protein 2A (Fragment) OS=Epstein-Barr virus (strain GD1) OX=10376 GN=LMP2A PE=4 SV=1	351	IRCCRYCCYYCLTLESEERPP
0.25	E2ESB3	tr|E2ESB3|E2ESB3_EBVG Latent membrane protein 2A (Fragment) OS=Epstein-Barr virus (strain GD1) OX=10376 GN=LMP2A PE=4 SV=1	351	IRCCRYCCYYCLTLESEERPP
0.25	A0A1V0EQ93	tr|A0A1V0EQ93|A0A1V0EQ93_CHIKV Togavirin OS=Chikungunya virus OX=37124 GN=gp3 PE=4 SV=1	788	PCCCKMLTFLAVLSRRCPHCE
0.25	E2ESC9	tr|E2ESC9|E2ESC9_EBVG Latent membrane protein 2A (Fragment) OS=Epstein-Barr virus (strain GD1) OX=10376 GN=LMP2A PE=4 SV=1	351	IRCCRYCCYYCLTLESEERPP
0.25	A0A0C7TAG2	tr|A0A0C7TAG2|A0A0C7TAG2_EBVG LMP-2B OS=Epstein-Barr virus (strain GD1) OX=10376 GN=LMP-2B PE=4 SV=1	351	IRCCRYCCYYCLTLESEERPP
0.25	E2ES45	tr|E2ES45|E2ES45_EBVG Latent membrane protein 2A (Fragment) OS=Epstein-Barr virus (strain GD1) OX=10376 GN=LMP2A PE=4 SV=1	351	IRCCRYCCYYCLTLESEERPP
0.25	E2ESC8	tr|E2ESC8|E2ESC8_EBVG Latent membrane protein 2A (Fragment) OS=Epstein-Barr virus (strain GD1) OX=10376 GN=LMP2A PE=4 SV=1	351	IRCCRYCCYYCLTLESEERPP
0.25	A0A221I1J7	tr|A0A221I1J7|A0A221I1J7_CHIKV Togavirin (Fragment) OS=Chikungunya virus OX=37124 PE=4 SV=1	772	IPLAALIVLCNCLRLLPCCCK
0.25	D0U7D2	tr|D0U7D2|D0U7D2_CHIKV Togavirin OS=Chikungunya virus OX=37124 PE=4 SV=1	772	IPLAALIVLCNCLRLLPCCCK
0.25	A0A1L5YJR5	tr|A0A1L5YJR5|A0A1L5YJR5_CHIKV Togavirin OS=Chikungunya virus OX=37124 PE=4 SV=1	772	IPLAALIVLCNCLRLLPCCCK
0.25	A0A6B7H7G8	tr|A0A6B7H7G8|A0A6B7H7G8_CHIKV Togavirin OS=Chikungunya virus OX=37124 PE=4 SV=1	772	IPLAALIVLCNCLRLLPCCCK
0.25	A0A1V0EPJ7	tr|A0A1V0EPJ7|A0A1V0EPJ7_CHIKV Togavirin OS=Chikungunya virus OX=37124 GN=gp3 PE=4 SV=1	788	PCCCKMLTFLAVLSRRCPHCE
0.25	A0A292QBL6	tr|A0A292QBL6|A0A292QBL6_CHIKV Spike glycoprotein E2 (Fragment) OS=Chikungunya virus OX=37124 GN=E2-6k-E1 PE=4 SV=1	447	IPLAALIVLCNCLRLLPCCCK
0.25	A0A6B9LW35	tr|A0A6B9LW35|A0A6B9LW35_CHIKV Togavirin OS=Chikungunya virus OX=37124 PE=4 SV=1	772	IPLAALIVLCNCLRLLPCCCK
0.25	A0A0S2XIR8	tr|A0A0S2XIR8|A0A0S2XIR8_CHIKV Spike glycoprotein E2 (Fragment) OS=Chikungunya virus OX=37124 PE=4 SV=1	447	IPLAALIVLCNCLRLLPCCCK
0.25	A0A6B9LW44	tr|A0A6B9LW44|A0A6B9LW44_CHIKV Togavirin OS=Chikungunya virus OX=37124 PE=4 SV=1	772	IPLAALIVLCNCLRLLPCCCK
0.25	A0A6B7H7H2	tr|A0A6B7H7H2|A0A6B7H7H2_CHIKV Togavirin OS=Chikungunya virus OX=37124 PE=4 SV=1	772	IPLAALIVLCNCLRLLPCCCK
0.25	D2DEK2	tr|D2DEK2|D2DEK2_CHIKV Togavirin OS=Chikungunya virus OX=37124 PE=4 SV=1	772	IPLAALIVLCNCLRLLPCCCK
0.25	A0A0S2XIQ7	tr|A0A0S2XIQ7|A0A0S2XIQ7_CHIKV Togavirin OS=Chikungunya virus OX=37124 PE=4 SV=1	772	IPLAALIVLCNCLRLLPCCCK
0.25	A0A292QBY0	tr|A0A292QBY0|A0A292QBY0_CHIKV Spike glycoprotein E2 (Fragment) OS=Chikungunya virus OX=37124 GN=E2-6k-E1 PE=4 SV=1	447	IPLAALIVLCNCLRLLPCCCK
0.25	A0A292QAP5	tr|A0A292QAP5|A0A292QAP5_CHIKV Spike glycoprotein E2 (Fragment) OS=Chikungunya virus OX=37124 GN=E2-6k-E1 PE=4 SV=1	447	IPLAALIVLCNCLRLLPCCCK
0.25	D7R980	tr|D7R980|D7R980_CHIKV Togavirin OS=Chikungunya virus OX=37124 GN=CHIKVgp2 PE=4 SV=1	772	IPLAALIVLCNCLRLLPCCCK
0.25	A0A2H4PVU9	tr|A0A2H4PVU9|A0A2H4PVU9_CHIKV Togavirin OS=Chikungunya virus OX=37124 GN=gp2 PE=4 SV=1	772	IPLAALIVLCNCLRLLPCCCK
0.25	A0A3R5V9M7	tr|A0A3R5V9M7|A0A3R5V9M7_CHIKV Togavirin OS=Chikungunya virus OX=37124 PE=4 SV=1	772	IPLAALIVLCNCLRLLPCCCK
0.25	A0A221I1H3	tr|A0A221I1H3|A0A221I1H3_CHIKV Capsid protein (Fragment) OS=Chikungunya virus OX=37124 PE=4 SV=1	772	IPLAALIVLCNCLRLLPCCCK
0.25	A0A3G9DY23	tr|A0A3G9DY23|A0A3G9DY23_CHIKV Togavirin OS=Chikungunya virus OX=37124 PE=4 SV=1	772	IPLAALIVLCNCLRLLPCCCK
0.25	A0A344MND3	tr|A0A344MND3|A0A344MND3_CHIKV Structural polyprotein (Fragment) OS=Chikungunya virus OX=37124 PE=4 SV=1	252	IPLAALIVLCNCLRLLPCCCK
0.25	A0A1V0EQR2	tr|A0A1V0EQR2|A0A1V0EQR2_CHIKV Togavirin OS=Chikungunya virus OX=37124 GN=gp3 PE=4 SV=1	788	PCCCKMLTFLAVLSRRCPHCE
0.25	A0A221I1L4	tr|A0A221I1L4|A0A221I1L4_CHIKV Togavirin (Fragment) OS=Chikungunya virus OX=37124 PE=4 SV=1	772	IPLAALIVLCNCLRLLPCCCK
0.25	E2ESC2	tr|E2ESC2|E2ESC2_EBVG Latent membrane protein 2A (Fragment) OS=Epstein-Barr virus (strain GD1) OX=10376 GN=LMP2A PE=4 SV=1	351	IRCCRYCCYYCLTLESEERPP
0.25	A0A3R5UBD7	tr|A0A3R5UBD7|A0A3R5UBD7_EBVG LMP-2B OS=Epstein-Barr virus (strain GD1) OX=10376 GN=LMP-2B PE=4 SV=1	351	IRCCRYCCYYCLTLESEERPP
0.25	A0A411HQX8	tr|A0A411HQX8|A0A411HQX8_CHIKV Togavirin (Fragment) OS=Chikungunya virus OX=37124 GN=gp3 PE=4 SV=1	741	PCCCKTLAFLAVMSRRCPHCE
0.25	A0A292Q9V4	tr|A0A292Q9V4|A0A292Q9V4_CHIKV Spike glycoprotein E2 (Fragment) OS=Chikungunya virus OX=37124 GN=E2-6k-E1 PE=4 SV=1	447	IPLAALIVLCNCLRLLPCCCK
0.25	A0A1L5YJN3	tr|A0A1L5YJN3|A0A1L5YJN3_CHIKV Togavirin OS=Chikungunya virus OX=37124 PE=4 SV=1	772	IPLAALIVLCNCLRLLPCCCK
0.25	A0A4D6GPP2	tr|A0A4D6GPP2|A0A4D6GPP2_CHIKV Togavirin OS=Chikungunya virus OX=37124 PE=4 SV=1	772	IPLAALIVLCNCLRLLPCCCK
0.25	D2DEH7	tr|D2DEH7|D2DEH7_CHIKV Togavirin OS=Chikungunya virus OX=37124 PE=4 SV=1	772	IPLAALIVLCNCLRLLPCCCK
0.25	G0YZ96	tr|G0YZ96|G0YZ96_CHIKV Togavirin OS=Chikungunya virus OX=37124 PE=4 SV=1	772	IPLAALIVLCNCLRLLPCCCK
0.25	E2ES44	tr|E2ES44|E2ES44_EBVG Latent membrane protein 2A (Fragment) OS=Epstein-Barr virus (strain GD1) OX=10376 GN=LMP2A PE=4 SV=1	351	IRCCRYCCYYCLTLESEERPP
0.25	A0A0U3TWY4	tr|A0A0U3TWY4|A0A0U3TWY4_EBVG LMP-2A OS=Epstein-Barr virus (strain GD1) OX=10376 GN=LMP-2A PE=4 SV=1	470	IRCCRYCCYYCLTLESEERPP
0.25	E2ES33	tr|E2ES33|E2ES33_EBVG Latent membrane protein 2A (Fragment) OS=Epstein-Barr virus (strain GD1) OX=10376 GN=LMP2A PE=4 SV=1	351	IRCCRYCCYYCLTLESEERPP
0.25	E2ES88	tr|E2ES88|E2ES88_EBVG Latent membrane protein 2A (Fragment) OS=Epstein-Barr virus (strain GD1) OX=10376 GN=LMP2A PE=4 SV=1	351	IRCCRYCCYYCLTLESEERPP
0.25	A0A221I1J6	tr|A0A221I1J6|A0A221I1J6_CHIKV Togavirin (Fragment) OS=Chikungunya virus OX=37124 PE=4 SV=1	772	IPLAALIVLCNCLRLLPCCCK
0.25	D7R967	tr|D7R967|D7R967_CHIKV Togavirin OS=Chikungunya virus OX=37124 GN=CHIKVgp2 PE=4 SV=1	772	IPLAALIVLCNCLRLLPCCCK
0.25	A0A342LJA0	tr|A0A342LJA0|A0A342LJA0_CHIKV Togavirin OS=Chikungunya virus OX=37124 PE=4 SV=1	772	IPLAALIVLCNCLRLLPCCCK
0.25	A0A385L3W1	tr|A0A385L3W1|A0A385L3W1_CHIKV Togavirin OS=Chikungunya virus OX=37124 PE=4 SV=1	772	IPLAALIVLCNCLRLLPCCCK
0.25	H8XW51	tr|H8XW51|H8XW51_CHIKV Togavirin OS=Chikungunya virus OX=37124 PE=4 SV=1	772	IPLAALIVLCNCLRLLPCCCK
0.25	A0A510C2X9	tr|A0A510C2X9|A0A510C2X9_CHIKV Togavirin OS=Chikungunya virus OX=37124 GN=SP PE=4 SV=1	788	PCCCKTLAFLSRNERRCPHCE
0.25	A0A125QWD1	tr|A0A125QWD1|A0A125QWD1_CHIKV Envelope E1 (Fragment) OS=Chikungunya virus OX=37124 PE=4 SV=1	46	IPLAALIVLCNCLRLLPCCCK
0.25	E2ES51	tr|E2ES51|E2ES51_EBVG Latent membrane protein 2A (Fragment) OS=Epstein-Barr virus (strain GD1) OX=10376 GN=LMP2A PE=4 SV=1	351	IRCCRYCCYYCLTLESEERPP
0.25	E2ES91	tr|E2ES91|E2ES91_EBVG Latent membrane protein 2A (Fragment) OS=Epstein-Barr virus (strain GD1) OX=10376 GN=LMP2A PE=4 SV=1	351	IRCCRYCCYYCLTLESEERPP
0.25	E2ESC7	tr|E2ESC7|E2ESC7_EBVG Latent membrane protein 2A (Fragment) OS=Epstein-Barr virus (strain GD1) OX=10376 GN=LMP2A PE=4 SV=1	351	IRCCRYCCYYCLTLESEERPP
0.25	E2ES92	tr|E2ES92|E2ES92_EBVG Latent membrane protein 2A (Fragment) OS=Epstein-Barr virus (strain GD1) OX=10376 GN=LMP2A PE=4 SV=1	351	IRCCRYCCYYCLTLESEERPP
0.25	E2ES69	tr|E2ES69|E2ES69_EBVG Latent membrane protein 2A (Fragment) OS=Epstein-Barr virus (strain GD1) OX=10376 GN=LMP2A PE=4 SV=1	351	IRCCRYCCYYCLTLESEERPP
0.25	E2ES65	tr|E2ES65|E2ES65_EBVG Latent membrane protein 2A (Fragment) OS=Epstein-Barr virus (strain GD1) OX=10376 GN=LMP2A PE=4 SV=1	351	IRCCRYCCYYCLTLESEERPP
0.25	A0A0C7TNS9	tr|A0A0C7TNS9|A0A0C7TNS9_EBVG K15 OS=Epstein-Barr virus (strain GD1) OX=10376 GN=LMP-2A PE=4 SV=1	470	IRCCRYCCYYCLTLESEERPP
0.25	A0A482DF41	tr|A0A482DF41|A0A482DF41_EBVG LMP-2A protein OS=Epstein-Barr virus (strain GD1) OX=10376 PE=4 SV=1	470	IRCCRYCCYYCLTLESEERPP
0.25	A0A1V0EPI4	tr|A0A1V0EPI4|A0A1V0EPI4_CHIKV Togavirin OS=Chikungunya virus OX=37124 GN=gp3 PE=4 SV=1	788	PCCCKMLTFLAVLSRRCPHCE
0.25	A0A0C4KH71	tr|A0A0C4KH71|A0A0C4KH71_CHIKV Togavirin OS=Chikungunya virus OX=37124 PE=4 SV=1	772	IPLAALIVLCNCLRLLPCCCK
0.25	D7R931	tr|D7R931|D7R931_CHIKV Togavirin OS=Chikungunya virus OX=37124 GN=CHIKVgp2 PE=4 SV=1	772	IPLAALIVLCNCLKLLPCCCK
0.25	A0A5P1W590	tr|A0A5P1W590|A0A5P1W590_9INFB Glycoprotein NB (Fragment) OS=Influenza B virus OX=11520 GN=NB PE=3 SV=1	43	RSNCTNNAIGLCKCIKCSGCE
0.25	A0A1S7DN15	tr|A0A1S7DN15|A0A1S7DN15_MCV1 MC157 OS=Molluscum contagiosum virus subtype 1 OX=10280 GN=MC157R PE=4 SV=1	333	LEPCKSECPPCPTRLPCKGCD
0.25	A0A0P0EQR2	tr|A0A0P0EQR2|A0A0P0EQR2_HPV53 Probable protein E5 (Fragment) OS=Human papillomavirus type 53 OX=333765 GN=E5 PE=3 SV=1	7	IVLCVSFVFLLCCFVCLFVCF
0.25	A0A0P0ERX0	tr|A0A0P0ERX0|A0A0P0ERX0_HPV73 Probable protein E5 OS=Human papillomavirus type 73 OX=51033 GN=E5 PE=3 SV=1	1	MILCIFVFLFCVGFCLCLCVS
0.25	A0A1S7DMH6	tr|A0A1S7DMH6|A0A1S7DMH6_MCV1 MC157 OS=Molluscum contagiosum virus subtype 1 OX=10280 GN=MC157R PE=4 SV=1	333	LEPCKSKCPPCPTRLPCKGCD
0.25	Q1H8W5	tr|Q1H8W5|Q1H8W5_CHIKV Togavirin OS=Chikungunya virus OX=37124 PE=1 SV=1	772	IPLAALIVLCNCLRLLPCCCK
0.25	A5Y7Y5	tr|A5Y7Y5|A5Y7Y5_CHIKV Togavirin OS=Chikungunya virus OX=37124 GN=SP PE=4 SV=1	772	IPLAALIVLCNCLRLLPCCCK
0.25	A0A6B9QPU5	tr|A0A6B9QPU5|A0A6B9QPU5_CHIKV Togavirin OS=Chikungunya virus OX=37124 PE=4 SV=1	772	IPLAALIVLCNCLRLLPCCCK
0.25	A0A1V0EPM2	tr|A0A1V0EPM2|A0A1V0EPM2_CHIKV Togavirin OS=Chikungunya virus OX=37124 GN=SP PE=4 SV=1	772	IPLAALIVLCNCLRLLPCCCK
0.25	A0A2P1HDZ4	tr|A0A2P1HDZ4|A0A2P1HDZ4_HPV16 Probable protein E5 OS=Human papillomavirus type 16 OX=333760 GN=E5 PE=3 SV=1	7	ASTTLLACFLLCFCVLLCVCL
0.25	A0A220NNC1	tr|A0A220NNC1|A0A220NNC1_HPV16 Probable protein E5 OS=Human papillomavirus type 16 OX=333760 GN=E5 PE=3 SV=1	7	ASTTLLACFLLCFCVLLCVCL
0.25	A0A2P1HJK4	tr|A0A2P1HJK4|A0A2P1HJK4_HPV16 Probable protein E5 OS=Human papillomavirus type 16 OX=333760 GN=E5 PE=3 SV=1	7	ASTTLLACFLLCFCVLLCVCL
0.25	A0A2P1HEK9	tr|A0A2P1HEK9|A0A2P1HEK9_HPV16 Probable protein E5 OS=Human papillomavirus type 16 OX=333760 GN=E5 PE=3 SV=1	7	ASTTLLACFLLCFCVLLCVCL
0.25	Q9WGD3	tr|Q9WGD3|Q9WGD3_HPV16 Probable protein E5 OS=Human papillomavirus type 16 OX=333760 GN=E5 PE=3 SV=1	7	TSTTLLACFLLCFCVLLCVCL
0.25	A0A2P1IDU1	tr|A0A2P1IDU1|A0A2P1IDU1_HPV16 Probable protein E5 OS=Human papillomavirus type 16 OX=333760 GN=E5 PE=3 SV=1	7	ASTTLLACFLLCFCVLLCVCL
0.25	A0A2P1HC70	tr|A0A2P1HC70|A0A2P1HC70_HPV16 Probable protein E5 OS=Human papillomavirus type 16 OX=333760 GN=E5 PE=3 SV=1	7	ASTTLLACFLLCFCVLLCVCL
0.25	B4Y4M2	tr|B4Y4M2|B4Y4M2_HBV Middle S protein OS=Hepatitis B virus OX=10407 GN=S PE=4 SV=1	112	ISSHSPTCCPPICPGCRWMCL
0.25	A0A220NLM0	tr|A0A220NLM0|A0A220NLM0_HPV16 Probable protein E5 OS=Human papillomavirus type 16 OX=333760 GN=E5 PE=3 SV=1	7	ASTTLLACFLLCFCVLLCVCL
0.25	A0A220NNQ3	tr|A0A220NNQ3|A0A220NNQ3_HPV16 Probable protein E5 OS=Human papillomavirus type 16 OX=333760 GN=E5 PE=3 SV=1	7	ASTTLLACFLLCFCVLLCVCL
0.25	A0A220NML2	tr|A0A220NML2|A0A220NML2_HPV16 Probable protein E5 OS=Human papillomavirus type 16 OX=333760 GN=E5 PE=3 SV=1	7	ASTTLLACFLLCFCVLLCVCL
0.25	A0A2P1HVP0	tr|A0A2P1HVP0|A0A2P1HVP0_HPV16 Probable protein E5 OS=Human papillomavirus type 16 OX=333760 GN=E5 PE=3 SV=1	7	ASTTLLACFLLCFCVLLCVCL
0.25	A0A2P1I4C8	tr|A0A2P1I4C8|A0A2P1I4C8_HPV16 Probable protein E5 OS=Human papillomavirus type 16 OX=333760 GN=E5 PE=3 SV=1	7	ASTTLLACFLLCFCVLLCVCL
0.25	A0A220NNL8	tr|A0A220NNL8|A0A220NNL8_HPV16 Probable protein E5 OS=Human papillomavirus type 16 OX=333760 GN=E5 PE=3 SV=1	7	ASTTLLACFVLCFCVLLCVCL
0.25	D7R998	tr|D7R998|D7R998_CHIKV Togavirin OS=Chikungunya virus OX=37124 GN=CHIKVgp2 PE=4 SV=1	772	IPLAALIVLCNCLRLLPCCCK
0.25	Q9WGD9	tr|Q9WGD9|Q9WGD9_HPV16 Probable protein E5 OS=Human papillomavirus type 16 OX=333760 GN=E5 PE=3 SV=1	7	ASTTLLACFLLCFCVLLCVCL
0.25	A0A2P1HMD1	tr|A0A2P1HMD1|A0A2P1HMD1_HPV16 Probable protein E5 OS=Human papillomavirus type 16 OX=333760 GN=E5 PE=3 SV=1	7	ASTTLLACFLLCFCVLLCVCL
0.25	A0A2P1I0A6	tr|A0A2P1I0A6|A0A2P1I0A6_HPV16 Probable protein E5 OS=Human papillomavirus type 16 OX=333760 GN=E5 PE=3 SV=1	7	ASTTLLACFLLCFCVLLCVCL
0.25	D2DEE1	tr|D2DEE1|D2DEE1_CHIKV Togavirin OS=Chikungunya virus OX=37124 PE=4 SV=1	772	IPLAALIVLCNCLRLLPCCCK
0.25	A0A1V0EPN1	tr|A0A1V0EPN1|A0A1V0EPN1_CHIKV Togavirin OS=Chikungunya virus OX=37124 GN=gp3 PE=4 SV=1	788	PCCCKMLTFLAVLSRRCPHCE
0.25	Q1W367	tr|Q1W367|Q1W367_CHIKV Togavirin OS=Chikungunya virus OX=37124 GN=SP PE=4 SV=1	772	IPLAALIVLCNCLRLLPCCCK
0.25	A0A1I7PD01	tr|A0A1I7PD01|A0A1I7PD01_CHIKV Togavirin OS=Chikungunya virus OX=37124 GN=gp3 PE=4 SV=1	788	PCCCKTLAFLAVMSRRCPHCE
0.25	F8S4K3	tr|F8S4K3|F8S4K3_HPV35 Probable protein E5 OS=Human papillomavirus type 35 OX=10587 GN=E5 PE=3 SV=1	10	VLLCFVLCFCVLLCLCLLVRS
0.25	B4Y4N5	tr|B4Y4N5|B4Y4N5_HBV S protein OS=Hepatitis B virus OX=10407 GN=S PE=4 SV=1	57	ISSHSPTCCPPICPGCRWMCL
0.25	H2ETB4	tr|H2ETB4|H2ETB4_CHIKV Togavirin OS=Chikungunya virus OX=37124 PE=4 SV=1	772	IPLAALIVLCNCLRLLPCCCK
0.25	A0A0U5BYS0	tr|A0A0U5BYS0|A0A0U5BYS0_ADE06 E3 CR1-alpha OS=Human adenovirus C serotype 6 OX=10534 GN=E3 PE=4 SV=1	35	LCLRVAACCTHICTYCQLFKR
0.25	Q84277	tr|Q84277|Q84277_HPV16 Probable protein E5 OS=Human papillomavirus type 16 OX=333760 GN=E5 PE=3 SV=1	7	AYTTLLACFLLCFCVLLCVCL
0.25	A0A1I9WLN7	tr|A0A1I9WLN7|A0A1I9WLN7_CHIKV Togavirin OS=Chikungunya virus OX=37124 PE=4 SV=1	772	IPLAALIVLCNCLRLLPCCCK
0.25	D2DEF1	tr|D2DEF1|D2DEF1_CHIKV Togavirin OS=Chikungunya virus OX=37124 PE=4 SV=1	772	IPLAALIVLCNCLRLLPCCCK
0.25	Q549H4	tr|Q549H4|Q549H4_HPV16 Probable protein E5 OS=Human papillomavirus type 16 OX=333760 GN=E5 PE=3 SV=1	7	ASTTLLACFLLCFCVLLCVCL
0.25	B4Y4N4	tr|B4Y4N4|B4Y4N4_HBV Middle S protein OS=Hepatitis B virus OX=10407 GN=S PE=4 SV=1	112	ISSHSPTCCPPICPGCRWMCL
0.25	A0A2P1IGJ0	tr|A0A2P1IGJ0|A0A2P1IGJ0_HPV16 Probable protein E5 OS=Human papillomavirus type 16 OX=333760 GN=E5 PE=3 SV=1	7	ASTTLLACFLLCFCVLLCVCL
0.25	K4F2R5	tr|K4F2R5|K4F2R5_HPV16 Probable protein E5 OS=Human papillomavirus type 16 OX=333760 GN=E5 PE=3 SV=1	7	ASTTLLACFVLCFCVLLCVCL
0.25	A0A0A8IL18	tr|A0A0A8IL18|A0A0A8IL18_EBVG LMP-2 OS=Epstein-Barr virus (strain GD1) OX=10376 GN=LMP2B PE=4 SV=1	351	IRCCRYCCYYCLTLESEERPP
0.25	A0A220NNB2	tr|A0A220NNB2|A0A220NNB2_HPV16 Probable protein E5 OS=Human papillomavirus type 16 OX=333760 GN=E5 PE=3 SV=1	7	ASTTLLACFLLCFCVLLCVCL
0.25	A0A0C7TV72	tr|A0A0C7TV72|A0A0C7TV72_EBVG K15 OS=Epstein-Barr virus (strain GD1) OX=10376 GN=LMP-2A PE=4 SV=1	470	IRCCRYCCYYCLTLESEERPP
0.25	A0A0D5MBB8	tr|A0A0D5MBB8|A0A0D5MBB8_CHIKV Togavirin OS=Chikungunya virus OX=37124 PE=4 SV=1	772	IPLAALIVLCNCLRLLPCCCK
0.25	A0A3R5TMN9	tr|A0A3R5TMN9|A0A3R5TMN9_EBVG LMP-2B OS=Epstein-Barr virus (strain GD1) OX=10376 GN=LMP-2B PE=4 SV=1	351	IRCCRYCCYYCLTLESEERPP
0.25	A0A0C7T1U3	tr|A0A0C7T1U3|A0A0C7T1U3_EBVG K15 OS=Epstein-Barr virus (strain GD1) OX=10376 GN=LMP-2A PE=4 SV=1	470	IRCCRYCCYYCLTLESEERPP
0.25	A0A1V0EQR7	tr|A0A1V0EQR7|A0A1V0EQR7_CHIKV Togavirin OS=Chikungunya virus OX=37124 GN=gp3 PE=4 SV=1	788	PCCCKMLTFLAVLSRRCPHCE
0.25	A0A1I7PCZ3	tr|A0A1I7PCZ3|A0A1I7PCZ3_CHIKV Togavirin OS=Chikungunya virus OX=37124 GN=gp3 PE=4 SV=1	788	PCCCKTLAFLAVMSHRCPHCE
0.25	A0A090C5S8	tr|A0A090C5S8|A0A090C5S8_CHIKV Togavirin OS=Chikungunya virus OX=37124 PE=4 SV=1	772	IPLAALIVLCNCLRLLPCCCK
0.25	A0A2P1IC63	tr|A0A2P1IC63|A0A2P1IC63_HPV16 Probable protein E5 OS=Human papillomavirus type 16 OX=333760 GN=E5 PE=3 SV=1	7	ASTTLLACFLLCFCVLLCVCL
0.25	A0A2P1I352	tr|A0A2P1I352|A0A2P1I352_HPV16 Probable protein E5 OS=Human papillomavirus type 16 OX=333760 GN=E5 PE=3 SV=1	7	ASTTLLACFLLCFCVLLCVCL
0.25	A0A2P1HNC6	tr|A0A2P1HNC6|A0A2P1HNC6_HPV16 Probable protein E5 OS=Human papillomavirus type 16 OX=333760 GN=E5 PE=3 SV=1	7	ASTTLLACFLLCFCVLLCVCL
0.25	A0A1V0EQ35	tr|A0A1V0EQ35|A0A1V0EQ35_CHIKV Togavirin OS=Chikungunya virus OX=37124 GN=gp3 PE=4 SV=1	788	PCCCKMLTFLAVLSRRCPHCE
0.25	A0A1S7DLZ1	tr|A0A1S7DLZ1|A0A1S7DLZ1_MCV2 MC157 OS=Molluscum contagiosum virus subtype 2 OX=10281 GN=MC157R PE=4 SV=1	331	SMPCKRECPPCPTRLPCKGCE
0.25	A0A0P0EAS3	tr|A0A0P0EAS3|A0A0P0EAS3_HPV73 Probable protein E5 OS=Human papillomavirus type 73 OX=51033 GN=E5 PE=3 SV=1	1	MILCIFVFLFCVGFCLCLCVS
0.25	D1GCB4	tr|D1GCB4|D1GCB4_CHIKV Togavirin OS=Chikungunya virus OX=37124 GN=SP PE=4 SV=1	772	IPLAALIVLCNCLRLLPCCCK
0.25	A0A2P1HYX3	tr|A0A2P1HYX3|A0A2P1HYX3_HPV16 Probable protein E5 OS=Human papillomavirus type 16 OX=333760 GN=E5 PE=3 SV=1	7	ASTTLLACFLLCFCVLLCVCL
0.25	H8XVY8	tr|H8XVY8|H8XVY8_CHIKV Togavirin OS=Chikungunya virus OX=37124 PE=4 SV=1	772	IPLAALIVLCNCLRLLPCCCN
0.25	A0A2P1I7E1	tr|A0A2P1I7E1|A0A2P1I7E1_HPV16 Probable protein E5 OS=Human papillomavirus type 16 OX=333760 GN=E5 PE=3 SV=1	7	ASTTLLACFLLCFCVLLCVCL
0.25	A0A0U1YJE9	tr|A0A0U1YJE9|A0A0U1YJE9_HBV S protein OS=Hepatitis B virus OX=10407 PE=4 SV=1	132	SMYPSCCCTKPSDGNCTCIPI
0.25	Q9WGC9	tr|Q9WGC9|Q9WGC9_HPV16 Probable protein E5 OS=Human papillomavirus type 16 OX=333760 GN=E5 PE=3 SV=1	7	ASTTLLACFLLCFCVLLCVCL
0.25	A0A2P1I8D1	tr|A0A2P1I8D1|A0A2P1I8D1_HPV16 Probable protein E5 OS=Human papillomavirus type 16 OX=333760 GN=E5 PE=3 SV=1	7	ASTTLLACFLLCFCVLLCVCL
0.25	A0A411HQS7	tr|A0A411HQS7|A0A411HQS7_CHIKV Togavirin OS=Chikungunya virus OX=37124 GN=gp3 PE=4 SV=1	788	PCCCKTLAFLAVMSRRCPHCE
0.25	A0A1D9IWF7	tr|A0A1D9IWF7|A0A1D9IWF7_HPV16 Probable protein E5 OS=Human papillomavirus type 16 OX=333760 GN=E5 PE=3 SV=1	7	ASTTLLACFLLCFCVLLCVCL
0.25	A0A3S9LWX5	tr|A0A3S9LWX5|A0A3S9LWX5_CHIKV Togavirin OS=Chikungunya virus OX=37124 PE=4 SV=1	772	IPLAALIVLCNCLRLLPCCCK
0.25	A0A2P1IFZ3	tr|A0A2P1IFZ3|A0A2P1IFZ3_HPV16 Probable protein E5 OS=Human papillomavirus type 16 OX=333760 GN=E5 PE=3 SV=1	7	ASTTLLACFLLCFCVLLCVCL
0.25	A0A2P1IGS5	tr|A0A2P1IGS5|A0A2P1IGS5_HPV16 Probable protein E5 OS=Human papillomavirus type 16 OX=333760 GN=E5 PE=3 SV=1	7	ASTTLLACFLLCFCVLLCVCL
0.25	A0A2P1I5H7	tr|A0A2P1I5H7|A0A2P1I5H7_HPV16 Probable protein E5 OS=Human papillomavirus type 16 OX=333760 GN=E5 PE=3 SV=1	7	ASTTLLACFLLCFCVLLCVCL
0.25	Q9WGD2	tr|Q9WGD2|Q9WGD2_HPV16 Probable protein E5 OS=Human papillomavirus type 16 OX=333760 GN=E5 PE=3 SV=1	7	ASTTLLACFLLCFCVLLCVCL
0.25	A0A384LJE3	tr|A0A384LJE3|A0A384LJE3_HPV16 Probable protein E5 OS=Human papillomavirus type 16 OX=333760 GN=E5 PE=3 SV=1	7	ASTTLLACFLLCFCVLLCVCL
0.25	A0A2P1IBU6	tr|A0A2P1IBU6|A0A2P1IBU6_HPV16 Probable protein E5 OS=Human papillomavirus type 16 OX=333760 GN=E5 PE=3 SV=1	7	ASTTLLACFLLCFCVLLCVCL
0.25	S6C518	tr|S6C518|S6C518_HPV16 Probable protein E5 OS=Human papillomavirus type 16 OX=333760 GN=E5 PE=3 SV=1	7	ASTTLLACFLLCFCVLLCVCL
0.25	A0A2P1HE78	tr|A0A2P1HE78|A0A2P1HE78_HPV16 Probable protein E5 OS=Human papillomavirus type 16 OX=333760 GN=E5 PE=3 SV=1	7	ASTTLLACFLLCFCVLLCVCL
0.25	A0A2P1HNG9	tr|A0A2P1HNG9|A0A2P1HNG9_HPV16 Probable protein E5 OS=Human papillomavirus type 16 OX=333760 GN=E5 PE=3 SV=1	7	ASTTLLACFLLCFCVLLCVCL
0.25	A0A3G1GWH8	tr|A0A3G1GWH8|A0A3G1GWH8_HBV S protein OS=Hepatitis B virus OX=10407 GN=S PE=4 SV=1	132	SMFPSCCCTKPTDGNCTCIPI
0.25	J3XMF5	tr|J3XMF5|J3XMF5_HPV16 Probable protein E5 OS=Human papillomavirus type 16 OX=333760 GN=E5 PE=3 SV=1	7	TSTTLLACFLLCFCVLLCVCL
0.25	B4Y4M1	tr|B4Y4M1|B4Y4M1_HBV Large envelope protein OS=Hepatitis B virus OX=10407 GN=S PE=3 SV=1	231	ISSHSPTCCPPICPGCRWMCL
0.25	A0A384LI56	tr|A0A384LI56|A0A384LI56_HPV16 Probable protein E5 OS=Human papillomavirus type 16 OX=333760 GN=E5 PE=3 SV=1	7	ASTTLLACFLLCFCVLLCVCL
0.25	A0A3R5W7F6	tr|A0A3R5W7F6|A0A3R5W7F6_EBVG LMP-2B OS=Epstein-Barr virus (strain GD1) OX=10376 GN=LMP-2B PE=4 SV=1	351	IRCCRYCCYYCLTLESEERPP
0.25	A0A0U2XKU0	tr|A0A0U2XKU0|A0A0U2XKU0_EBVG LMP-2B OS=Epstein-Barr virus (strain GD1) OX=10376 GN=LMP-2B PE=4 SV=1	351	IRCCRYCCYYCLTLESEERPP
0.25	A0A0C7TSP7	tr|A0A0C7TSP7|A0A0C7TSP7_EBVG LMP-2B OS=Epstein-Barr virus (strain GD1) OX=10376 GN=LMP-2B PE=4 SV=1	351	IRCCRYCCYYCLTLESEERPP
0.25	A0A2P1ILG5	tr|A0A2P1ILG5|A0A2P1ILG5_HPV16 Probable protein E5 OS=Human papillomavirus type 16 OX=333760 GN=E5 PE=3 SV=1	7	ASTTLLACFLLCFCVLLCVCL
0.25	Q9W901	tr|Q9W901|Q9W901_HPV16 Probable protein E5 OS=Human papillomavirus type 16 OX=333760 GN=E5 PE=3 SV=1	7	ASTTLLACFLLCFCVLLCVCL
0.25	Q9WGD8	tr|Q9WGD8|Q9WGD8_HPV16 Probable protein E5 OS=Human papillomavirus type 16 OX=333760 GN=E5 PE=3 SV=1	7	ASTTLLACFLLCFCVLLCVCL
0.25	Q98323	tr|Q98323|Q98323_MCV1 MC157 OS=Molluscum contagiosum virus subtype 1 OX=10280 GN=MC157R PE=4 SV=1	333	LEPCKSKCPPCPTRLPCKGCD
0.25	A0A2P1HEG1	tr|A0A2P1HEG1|A0A2P1HEG1_HPV16 Probable protein E5 OS=Human papillomavirus type 16 OX=333760 GN=E5 PE=3 SV=1	7	ASTTLLACFLLCFCVLLCVCL
0.25	A0A6C0M4W5	tr|A0A6C0M4W5|A0A6C0M4W5_CHIKV Togavirin OS=Chikungunya virus OX=37124 PE=4 SV=1	772	IPLAALIVLCNCLRLLPCCCK
0.25	A0A2P1IB58	tr|A0A2P1IB58|A0A2P1IB58_HPV16 Probable protein E5 OS=Human papillomavirus type 16 OX=333760 GN=E5 PE=3 SV=1	7	ASTTLLACFLLCFCVLLCVCL
0.25	A0A221I1L1	tr|A0A221I1L1|A0A221I1L1_CHIKV Togavirin OS=Chikungunya virus OX=37124 PE=4 SV=1	772	IPLAALIVLCNCLRLLPCCCK
0.25	D9ZD67	tr|D9ZD67|D9ZD67_CHIKV Togavirin OS=Chikungunya virus OX=37124 PE=4 SV=1	772	IPLAALIVLCNCLRLLPCCCK
0.25	A0A0C7T6V2	tr|A0A0C7T6V2|A0A0C7T6V2_EBVG K15 OS=Epstein-Barr virus (strain GD1) OX=10376 GN=LMP-2A PE=4 SV=1	470	IRCCRYCCYYCLTLESEERPP
0.25	A0A3R5WST0	tr|A0A3R5WST0|A0A3R5WST0_EBVG LMP-2B OS=Epstein-Barr virus (strain GD1) OX=10376 GN=LMP-2B PE=4 SV=1	351	IRCCRYCCYYCLTLESEERPP
0.25	A0A6H0D482	tr|A0A6H0D482|A0A6H0D482_9INFB Glycoprotein NB OS=Influenza B virus OX=11520 GN=NB PE=3 SV=1	46	RNNCTNNAIGLCKRIKCSCCE
0.25	A0A2P1HRY8	tr|A0A2P1HRY8|A0A2P1HRY8_HPV16 Probable protein E5 OS=Human papillomavirus type 16 OX=333760 GN=E5 PE=3 SV=1	7	ASTTLLACFLLCFCVLLCVCL
0.25	A0A1I9KAU6	tr|A0A1I9KAU6|A0A1I9KAU6_HBV HBsAg OS=Hepatitis B virus OX=10407 PE=4 SV=1	57	ICSHSPTCCPPICPGYRWMCL
0.25	D8V2S2	tr|D8V2S2|D8V2S2_HBV Large envelope protein OS=Hepatitis B virus OX=10407 GN=preS1/preS2/S PE=3 SV=1	306	SMFPSCCCTKPTDGNCTCIPI
0.25	A0A0B5HBE8	tr|A0A0B5HBE8|A0A0B5HBE8_HBV Large envelope protein OS=Hepatitis B virus OX=10407 GN=S PE=3 SV=1	306	SMFPSCCCTKPMDGNCTCIPI
0.25	A0A2U9QNI8	tr|A0A2U9QNI8|A0A2U9QNI8_HBV S protein (Fragment) OS=Hepatitis B virus OX=10407 GN=S PE=4 SV=1	34	SMYPSCCCTKPSDGNCTCIPI
0.25	Q5U7P5	tr|Q5U7P5|Q5U7P5_HBV Small S protein OS=Hepatitis B virus OX=10407 GN=S PE=4 SV=1	136	SCCCTKPSDGNCTCIPIPSSW
0.25	W0JEF2	tr|W0JEF2|W0JEF2_HBV Small S protein (Fragment) OS=Hepatitis B virus OX=10407 GN=S PE=4 SV=1	41	SSCCYASSSCWFLWTTKVCCP
0.25	A0A1S6KH15	tr|A0A1S6KH15|A0A1S6KH15_HBV Surface protein (Fragment) OS=Hepatitis B virus OX=10407 PE=4 SV=1	115	SMFPSCCCTKPTDGNCTCIPI
0.25	A0A0N9K885	tr|A0A0N9K885|A0A0N9K885_HBV S protein (Fragment) OS=Hepatitis B virus OX=10407 GN=S PE=4 SV=1	80	SMFPSCCCTKPTDGNCTCIPI
0.25	A0A1P8PF64	tr|A0A1P8PF64|A0A1P8PF64_HBV Large envelope protein OS=Hepatitis B virus OX=10407 GN=S PE=3 SV=1	294	PCRTCTITAQGTSMFPSCCCT
0.25	Q91T83	tr|Q91T83|Q91T83_HBV Major S protein (Fragment) OS=Hepatitis B virus OX=10407 GN=preS/S PE=4 SV=1	132	SMFPSCCCSKPSDGNCTCIPI
0.25	Q9JE50	tr|Q9JE50|Q9JE50_HBV S antigen OS=Hepatitis B virus OX=10407 GN=S PE=4 SV=1	132	SKFPSCCCTKPTDGNCTCIPI
0.25	W0JER0	tr|W0JER0|W0JER0_HBV Small S protein (Fragment) OS=Hepatitis B virus OX=10407 GN=S PE=4 SV=1	41	SSCCYASSSCWFFWTTKVCCP
0.25	W0JEP8	tr|W0JEP8|W0JEP8_HBV Small S protein (Fragment) OS=Hepatitis B virus OX=10407 GN=S PE=4 SV=1	42	ASCCYASSSCWFFWTIKVCCP
0.25	M5AVS5	tr|M5AVS5|M5AVS5_HBV S protein (Fragment) OS=Hepatitis B virus OX=10407 GN=S PE=4 SV=1	57	ICSHSPTCCPPICPGYRWMCL
0.25	G3E5K2	tr|G3E5K2|G3E5K2_HBV Small S protein OS=Hepatitis B virus OX=10407 GN=S PE=4 SV=1	132	SLFPSCCCTKPSDGNCTCIPI
0.25	A0A2U9QP73	tr|A0A2U9QP73|A0A2U9QP73_HBV S protein (Fragment) OS=Hepatitis B virus OX=10407 GN=S PE=4 SV=1	34	SMFPSCCCTKPTDGNCTCIPI
0.25	Q6L9E4	tr|Q6L9E4|Q6L9E4_HBV S protein (Fragment) OS=Hepatitis B virus OX=10407 GN=S PE=4 SV=1	93	SMFPSCCCTKPTDGNCTCIPI
0.25	A0A2U9QNW7	tr|A0A2U9QNW7|A0A2U9QNW7_HBV S protein (Fragment) OS=Hepatitis B virus OX=10407 GN=S PE=4 SV=1	34	SMFPSCCCTKPTDGNCTCIPI
0.25	Q8JXC0	tr|Q8JXC0|Q8JXC0_HBV Surface antigen OS=Hepatitis B virus OX=10407 GN=S PE=4 SV=1	50	GQNSQCQICSHSPTCCPPICP
0.25	Q3ZKQ6	tr|Q3ZKQ6|Q3ZKQ6_HBV Large envelope protein OS=Hepatitis B virus OX=10407 GN=pre-S/S PE=3 SV=1	305	NSMFPSCCCTKPTDGNCTCIP
0.25	A0A109NXU6	tr|A0A109NXU6|A0A109NXU6_HBV Surface protein (Fragment) OS=Hepatitis B virus OX=10407 PE=4 SV=1	30	ICSHSPTCCPPICPGYRWMCL
0.25	Q91T85	tr|Q91T85|Q91T85_HBV Large envelope protein (Fragment) OS=Hepatitis B virus OX=10407 GN=preS/S PE=4 SV=1	249	SMFPSCCCSKPSDGNCTCIPI
0.25	A0A0G3F387	tr|A0A0G3F387|A0A0G3F387_HBV Large envelope protein OS=Hepatitis B virus OX=10407 GN=S PE=3 SV=1	306	SMFPSCCCTKPSDGNCTCIPI
0.25	A0A451EIN7	tr|A0A451EIN7|A0A451EIN7_HBV Large envelope protein OS=Hepatitis B virus OX=10407 GN=S PE=3 SV=1	295	SMYPSCCCTKPSDGNCTCIPI
0.25	Q5U7R8	tr|Q5U7R8|Q5U7R8_HBV Small S protein OS=Hepatitis B virus OX=10407 GN=S PE=4 SV=1	136	SCCCTKPSDGNCTCIPIPSSW
0.25	B6DY05	tr|B6DY05|B6DY05_HBV S protein (Fragment) OS=Hepatitis B virus OX=10407 GN=S PE=4 SV=1	12	SMYPSCCCTKPSDGNCTCIPI
0.25	V9P6Z5	tr|V9P6Z5|V9P6Z5_HBV Small surface protein OS=Hepatitis B virus OX=10407 GN=s PE=4 SV=1	132	SMFPSCCCTKPSDGNCTCIPI
0.25	A0A0B5GZN0	tr|A0A0B5GZN0|A0A0B5GZN0_HBV Surface protein OS=Hepatitis B virus OX=10407 GN=S PE=4 SV=1	132	SMFPSCCCTKPMDGNCTCIPI
0.25	H8WS56	tr|H8WS56|H8WS56_HBV Putative surface antigen OS=Hepatitis B virus OX=10407 GN=S PE=4 SV=1	57	ISSHSPTCCPPICPGYCWMCL
0.25	W0JA32	tr|W0JA32|W0JA32_HBV Small S protein (Fragment) OS=Hepatitis B virus OX=10407 GN=S PE=4 SV=1	42	SSCCYASSSCWFFWTTKVCCP
0.25	A0A451EIN8	tr|A0A451EIN8|A0A451EIN8_HBV Middle S protein OS=Hepatitis B virus OX=10407 GN=S PE=4 SV=1	187	SMYPSCCCTKPSDGNCTCIPI
0.25	G5CN74	tr|G5CN74|G5CN74_HBV Large S protein (Fragment) OS=Hepatitis B virus OX=10407 GN=S PE=4 SV=1	140	SMYPSCCCTKPSDGNCTCIPI
0.25	A0A1B1ABQ8	tr|A0A1B1ABQ8|A0A1B1ABQ8_HBV Small surface protein OS=Hepatitis B virus OX=10407 GN=S PE=4 SV=1	132	SMFPSCCCTKPTDGNCTCIPI
0.25	K7QGI7	tr|K7QGI7|K7QGI7_HBV S protein OS=Hepatitis B virus OX=10407 GN=S PE=4 SV=1	132	SMFPSCCCTKPSDGNCTCIPI
0.25	G3E5K0	tr|G3E5K0|G3E5K0_HBV Large envelope protein OS=Hepatitis B virus OX=10407 GN=S PE=3 SV=1	293	GTSLFPSCCCTKPSDGNCTCI
0.25	B0YJG6	tr|B0YJG6|B0YJG6_HBV Middle S protein (Fragment) OS=Hepatitis B virus OX=10407 GN=S PE=4 SV=1	45	SMFPSCCCTKPTDGNCTCIPI
0.25	A0A0G3F0J9	tr|A0A0G3F0J9|A0A0G3F0J9_HBV Middle surface protein OS=Hepatitis B virus OX=10407 GN=S PE=4 SV=1	187	SMFPSCCCTKPSDGNCTCIPI
0.25	A0A1S6KHS7	tr|A0A1S6KHS7|A0A1S6KHS7_HBV Surface protein (Fragment) OS=Hepatitis B virus OX=10407 PE=4 SV=1	113	GTSILPLCCCSKPSDGNCTCI
0.25	A0A4D6V237	tr|A0A4D6V237|A0A4D6V237_HBV Surface antigen (Fragment) OS=Hepatitis B virus OX=10407 GN=S PE=4 SV=1	142	SMFPSCCCTKPTDGNCTCIPI
0.25	D5LCL0	tr|D5LCL0|D5LCL0_HBV Small S protein OS=Hepatitis B virus OX=10407 GN=S PE=4 SV=1	132	SMFPSCCCTKPTDGNCTCIPI
0.25	A0A2U9QNK9	tr|A0A2U9QNK9|A0A2U9QNK9_HBV S protein (Fragment) OS=Hepatitis B virus OX=10407 GN=S PE=4 SV=1	34	SMFPSCCCTKPTDGNCTCIPI
0.25	A0A4D6V2Q2	tr|A0A4D6V2Q2|A0A4D6V2Q2_HBV Surface antigen (Fragment) OS=Hepatitis B virus OX=10407 GN=S PE=4 SV=1	142	SMFPSCCCTKPTDGNCTCIPI
0.25	A0A2H4U2E2	tr|A0A2H4U2E2|A0A2H4U2E2_HBV S protein OS=Hepatitis B virus OX=10407 GN=S PE=4 SV=1	132	SMFPSCCCTKPSDGNCTCIPI
0.25	A0A0N9JWC8	tr|A0A0N9JWC8|A0A0N9JWC8_HBV S protein (Fragment) OS=Hepatitis B virus OX=10407 GN=S PE=4 SV=1	80	SMYPSCCCTKPSDGNCTCIPI
0.25	W8NL93	tr|W8NL93|W8NL93_HBV Surface protein (Fragment) OS=Hepatitis B virus OX=10407 GN=S PE=4 SV=1	76	SMYPSCCCTKPSDGNCTCIPI
0.25	A0A0U1YM45	tr|A0A0U1YM45|A0A0U1YM45_HBV Middle S protein OS=Hepatitis B virus OX=10407 PE=4 SV=1	187	SMYPSCCCTKPSDGNCTCIPI
0.25	A0A0U1YJH2	tr|A0A0U1YJH2|A0A0U1YJH2_HBV S protein OS=Hepatitis B virus OX=10407 PE=4 SV=1	132	SMYPSCCCTKPSDGNCTCIPI
0.25	A0A2U9QMG1	tr|A0A2U9QMG1|A0A2U9QMG1_HBV Truncated S protein (Fragment) OS=Hepatitis B virus OX=10407 GN=S PE=4 SV=1	34	SMFPSCCCTKPTDGNCTCIPI
0.25	E0ZNL5	tr|E0ZNL5|E0ZNL5_HBV S protein (Fragment) OS=Hepatitis B virus OX=10407 GN=S PE=4 SV=1	22	ISSHSLTCCPPICPGCRWMCL
0.25	Q6TVK0	tr|Q6TVK0|Q6TVK0_ORFSA Uncharacterized protein OS=Orf virus (strain Goat/Texas/SA00/2000) OX=647330 PE=4 SV=1	142	YKQGLCNCFCKMFPCCKELKD
0.25	A0A2U9QM31	tr|A0A2U9QM31|A0A2U9QM31_HBV S protein (Fragment) OS=Hepatitis B virus OX=10407 GN=S PE=4 SV=1	34	SMFPSCCCTKPTDGNCTCIPI
0.25	A0A2U9QNM0	tr|A0A2U9QNM0|A0A2U9QNM0_HBV S protein (Fragment) OS=Hepatitis B virus OX=10407 GN=S PE=4 SV=1	34	SMFPSCCCTKPTDGNCTCIPI
0.25	A0A3G1GWT5	tr|A0A3G1GWT5|A0A3G1GWT5_HBV S protein OS=Hepatitis B virus OX=10407 GN=S PE=4 SV=1	132	SMFPSCCCIEPTDGNCTCIPI
0.25	Q9YPU4	tr|Q9YPU4|Q9YPU4_HBV Large envelope protein OS=Hepatitis B virus OX=10407 GN=S PE=3 SV=1	294	TSLYPSCCCTKPSDGNCTCIP
0.25	A0A3G1GUJ8	tr|A0A3G1GUJ8|A0A3G1GUJ8_HBV S protein OS=Hepatitis B virus OX=10407 GN=S PE=4 SV=1	132	SMFPSCCCTKPTDGNCTCIPI
0.25	A0A2U9QNH2	tr|A0A2U9QNH2|A0A2U9QNH2_HBV S protein (Fragment) OS=Hepatitis B virus OX=10407 GN=S PE=4 SV=1	34	SMFPSCCCTKPSDGNCTCIPI
0.25	A0A3G1GUK0	tr|A0A3G1GUK0|A0A3G1GUK0_HBV S protein OS=Hepatitis B virus OX=10407 GN=S PE=4 SV=1	132	SMFPSCCCTKPTDGNCTCIPI
0.25	W0SKU1	tr|W0SKU1|W0SKU1_HBV Large envelope protein OS=Hepatitis B virus OX=10407 GN=S PE=3 SV=1	231	ICSHSPTCCPPICPGYRWMCL
0.25	A0A4D6V1U9	tr|A0A4D6V1U9|A0A4D6V1U9_HBV Surface antigen (Fragment) OS=Hepatitis B virus OX=10407 GN=S PE=4 SV=1	142	SMFPSCCCSKPTDGNCTCIPI
0.25	D0EE56	tr|D0EE56|D0EE56_HBV Truncated middle S protein OS=Hepatitis B virus OX=10407 PE=4 SV=1	187	SMFPSCCCTKPTDGNCTCIPI
0.25	A0A1P8PF66	tr|A0A1P8PF66|A0A1P8PF66_HBV Middle S protein OS=Hepatitis B virus OX=10407 GN=S PE=4 SV=1	175	PCRTCTITAQGTSMFPSCCCT
0.25	W0JDX3	tr|W0JDX3|W0JDX3_HBV Small S protein (Fragment) OS=Hepatitis B virus OX=10407 GN=S PE=4 SV=1	43	ASCCYASSSCWFFWTIKVCCP
0.25	B0YJG5	tr|B0YJG5|B0YJG5_HBV Large S protein (Fragment) OS=Hepatitis B virus OX=10407 GN=S PE=4 SV=1	45	SMFPSCCCTKPTDGNCTCIPI
0.25	A0A2H4NN60	tr|A0A2H4NN60|A0A2H4NN60_HBV Surface protein OS=Hepatitis B virus OX=10407 GN=S PE=4 SV=1	132	SMFPSCCCTKPSDGNCTCIPI
0.25	A0A1P8PF70	tr|A0A1P8PF70|A0A1P8PF70_HBV Small S protein OS=Hepatitis B virus OX=10407 GN=S PE=4 SV=1	120	PCRTCTITAQGTSMFPSCCCT
0.25	A0A0F7LIQ0	tr|A0A0F7LIQ0|A0A0F7LIQ0_HBV S protein OS=Hepatitis B virus OX=10407 GN=S PE=4 SV=1	132	SMFPSCCCTKPTDGNCTCIPI
0.25	D0EE55	tr|D0EE55|D0EE55_HBV Large envelope protein OS=Hepatitis B virus OX=10407 GN=S PE=3 SV=1	306	SMFPSCCCTKPTDGNCTCIPI
0.25	A0A2Z5D8G2	tr|A0A2Z5D8G2|A0A2Z5D8G2_HBV S protein OS=Hepatitis B virus OX=10407 GN=S PE=4 SV=1	132	SMFPSCCCTKPTDGNCTCIPI
0.25	A0A4D6V008	tr|A0A4D6V008|A0A4D6V008_HBV Surface antigen (Fragment) OS=Hepatitis B virus OX=10407 GN=S PE=4 SV=1	142	SMFPSCCCTKPTDGNCTCIPI
0.25	A0A0G3F6R4	tr|A0A0G3F6R4|A0A0G3F6R4_HBV Small surface protein OS=Hepatitis B virus OX=10407 GN=S PE=4 SV=1	132	SMFPSCCCTKPSDGNCTCIPI
0.25	B6DXZ1	tr|B6DXZ1|B6DXZ1_HBV S protein (Fragment) OS=Hepatitis B virus OX=10407 GN=S PE=4 SV=1	12	SMYPSCCCTKPSDGNCTCIPI
0.25	A0A4P8XSM4	tr|A0A4P8XSM4|A0A4P8XSM4_CHIKV Togavirin OS=Chikungunya virus OX=37124 PE=4 SV=1	772	IPLAALIVLCNCLRLLPCCCK
0.25	A0A1V0EPP6	tr|A0A1V0EPP6|A0A1V0EPP6_CHIKV Togavirin OS=Chikungunya virus OX=37124 GN=gp3 PE=4 SV=1	788	PCCCKMLTFLAVLSRRCPHCE
0.25	Q00K91	tr|Q00K91|Q00K91_HBV HBsAg OS=Hepatitis B virus OX=10407 GN=S PE=4 SV=1	57	ICSHSPTCCPPTCPGYRWMCL
0.25	D8V2U5	tr|D8V2U5|D8V2U5_HBV Large envelope protein OS=Hepatitis B virus OX=10407 GN=preS1/preS2/S PE=3 SV=1	306	SMFPSCCCTKPTDGNCTCIPI
0.25	A0A0C7T3H0	tr|A0A0C7T3H0|A0A0C7T3H0_EBVG K15 OS=Epstein-Barr virus (strain GD1) OX=10376 GN=LMP-2A PE=4 SV=1	470	IRCCRYCCYYCLTLESEERPP
0.25	A0A0C7SZD9	tr|A0A0C7SZD9|A0A0C7SZD9_EBVG K15 OS=Epstein-Barr virus (strain GD1) OX=10376 GN=LMP-2A PE=4 SV=1	470	IRCCRYCCYYCLTLESEERPP
0.25	A0A2H4YBS6	tr|A0A2H4YBS6|A0A2H4YBS6_HBV Small surface antigen (Fragment) OS=Hepatitis B virus OX=10407 PE=4 SV=1	82	SMFPSCCCTKPTDGNCTCIPI
0.25	Q52X23	tr|Q52X23|Q52X23_HBV HBsAg (Fragment) OS=Hepatitis B virus OX=10407 PE=4 SV=1	21	SMFPSCCCTKPTDGNCTCIPI
0.25	Q9EM65	tr|Q9EM65|Q9EM65_HBV Large envelope protein OS=Hepatitis B virus OX=10407 GN=S PE=3 SV=2	300	SCCCTKPSDGNCTCIPIPSSW
0.25	A1BUI0	tr|A1BUI0|A1BUI0_HBV Surface antigen (Fragment) OS=Hepatitis B virus OX=10407 GN=S PE=4 SV=1	19	ICSHSPTCCPQICPGYRWMCL
0.25	A0A4Y6HSH2	tr|A0A4Y6HSH2|A0A4Y6HSH2_HBV Surface protein OS=Hepatitis B virus OX=10407 GN=S PE=4 SV=1	57	ICSHSPTCCPPICPGYRWMCL
0.25	A0A0F6TLQ0	tr|A0A0F6TLQ0|A0A0F6TLQ0_HBV Small S protein OS=Hepatitis B virus OX=10407 GN=S PE=4 SV=1	60	HSPTCCPPICLGYRWMCLRCF
0.25	H8WSZ8	tr|H8WSZ8|H8WSZ8_HBV Putative surface antigen OS=Hepatitis B virus OX=10407 GN=S PE=4 SV=1	132	SMFPSCCCTKPTDGNCTCIPI
0.25	U3KUG2	tr|U3KUG2|U3KUG2_HBV Large envelope protein OS=Hepatitis B virus OX=10407 GN=S PE=3 SV=1	306	SMFPSCCCTKPSDGNCTCIPI
0.25	A0A2U9QMG4	tr|A0A2U9QMG4|A0A2U9QMG4_HBV S protein (Fragment) OS=Hepatitis B virus OX=10407 GN=S PE=4 SV=1	34	SMFPSCCCTKPTDGNCTCIPI
0.25	A0A517D2Q5	tr|A0A517D2Q5|A0A517D2Q5_HBV S protein OS=Hepatitis B virus OX=10407 GN=S PE=4 SV=1	132	SMYPSCCCTKPSDGNCTCIPI
0.25	A0A3S5XCK4	tr|A0A3S5XCK4|A0A3S5XCK4_HBV S protein OS=Hepatitis B virus OX=10407 GN=S PE=4 SV=1	132	SMYPSCCCTKPSDGNCTCIPI
0.25	G3E5K1	tr|G3E5K1|G3E5K1_HBV Middle S protein OS=Hepatitis B virus OX=10407 GN=S PE=4 SV=1	185	GTSLFPSCCCTKPSDGNCTCI
0.25	A0A2U9QM78	tr|A0A2U9QM78|A0A2U9QM78_HBV S protein (Fragment) OS=Hepatitis B virus OX=10407 GN=S PE=4 SV=1	38	SCCCTKPTDGNCTCIPIPSSW
0.25	D1GCB6	tr|D1GCB6|D1GCB6_CHIKV Togavirin OS=Chikungunya virus OX=37124 PE=4 SV=1	772	IPLAALIVLCNCLRLLPCCCK
0.25	A0A0C7TPI4	tr|A0A0C7TPI4|A0A0C7TPI4_EBVG K15 OS=Epstein-Barr virus (strain GD1) OX=10376 GN=LMP-2A PE=4 SV=1	470	IRCCRYCCYYCLTLESEERPP
0.25	A0A0C7T918	tr|A0A0C7T918|A0A0C7T918_EBVG K15 OS=Epstein-Barr virus (strain GD1) OX=10376 GN=LMP-2A PE=4 SV=1	470	IRCCRYCCYYCLTLESEERPP
0.25	A0A1V0EPN5	tr|A0A1V0EPN5|A0A1V0EPN5_CHIKV Togavirin OS=Chikungunya virus OX=37124 GN=gp3 PE=4 SV=1	788	PCCCKMLTFLVVLSRRCPHCE
0.25	A0A075FF56	tr|A0A075FF56|A0A075FF56_EBVG LMP-2B OS=Epstein-Barr virus (strain GD1) OX=10376 GN=LMP-2B PE=4 SV=1	351	IRCCRYCCYYCLTLESEERPP
0.25	A0A0C7P5S0	tr|A0A0C7P5S0|A0A0C7P5S0_EBVG LMP-2B OS=Epstein-Barr virus (strain GD1) OX=10376 GN=LMP-2B PE=4 SV=1	351	IRCCRYCCYYCLTLESEERPP
0.25	A6MH27	tr|A6MH27|A6MH27_CHIKV Togavirin OS=Chikungunya virus OX=37124 GN=CHIKVgp2 PE=4 SV=1	772	IPLAALIVLCNCLRLLPCCCK
0.25	A0A384KXH3	tr|A0A384KXH3|A0A384KXH3_HPV16 Probable protein E5 OS=Human papillomavirus type 16 OX=333760 GN=E5 PE=3 SV=1	7	ASTTLLACFLLCFCVLLCVCL
0.25	A0A4P2SGV6	tr|A0A4P2SGV6|A0A4P2SGV6_ADE02 E3 CR1-alpha OS=Human adenovirus C serotype 2 OX=10515 GN=E3 PE=4 SV=1	35	LCLRVAACCTHVCTYCQLFKR
0.25	A9LMA7	tr|A9LMA7|A9LMA7_CHIKV Togavirin OS=Chikungunya virus OX=37124 GN=SP PE=4 SV=1	772	IPLAALIVLCNCLRLLPCCCK
0.25	A6MH13	tr|A6MH13|A6MH13_CHIKV Togavirin OS=Chikungunya virus OX=37124 PE=4 SV=1	772	IPLAALIVLCNCLRLLPCCCK
0.25	A0A2D1PJJ8	tr|A0A2D1PJJ8|A0A2D1PJJ8_CHIKV Togavirin OS=Chikungunya virus OX=37124 PE=4 SV=1	772	IPLAALIVLCNCLRLLPCCCK
0.25	D7R929	tr|D7R929|D7R929_CHIKV Togavirin OS=Chikungunya virus OX=37124 GN=CHIKVgp2 PE=4 SV=1	772	IPLAALIVLCNCLKLLPCCCK
0.25	A0A2P1I029	tr|A0A2P1I029|A0A2P1I029_HPV16 Probable protein E5 OS=Human papillomavirus type 16 OX=333760 GN=E5 PE=3 SV=1	7	ASTTLLACFLLCFCVLLCVCL
0.25	B4Y4M3	tr|B4Y4M3|B4Y4M3_HBV S protein OS=Hepatitis B virus OX=10407 GN=S PE=4 SV=1	57	ISSHSPTCCPPICPGCRWMCL
0.25	A0A482DEI1	tr|A0A482DEI1|A0A482DEI1_EBVG LMP-2A protein OS=Epstein-Barr virus (strain GD1) OX=10376 PE=4 SV=1	470	IRCCRYCCYYCLTLESEERPP
0.25	A0A411HQT9	tr|A0A411HQT9|A0A411HQT9_CHIKV Togavirin OS=Chikungunya virus OX=37124 GN=gp3 PE=4 SV=1	788	PCCCKTLAFLAVLSRRCPHCE
0.25	A0A291I8Z3	tr|A0A291I8Z3|A0A291I8Z3_CHIKV Togavirin OS=Chikungunya virus OX=37124 PE=4 SV=1	772	IPLAALIVLCNCLRLLPCCCK
0.25	A0A6B9RQV2	tr|A0A6B9RQV2|A0A6B9RQV2_9INFB Glycoprotein NB OS=Influenza B virus OX=11520 GN=NB PE=3 SV=1	46	RNNCTNNAIGLCKCIECSGCE
0.25	A0A0C7TW55	tr|A0A0C7TW55|A0A0C7TW55_EBVG K15 OS=Epstein-Barr virus (strain GD1) OX=10376 GN=LMP-2A PE=4 SV=1	470	IRCCRYCCYYCLTLESEERPP
0.25	A0A0C7SWP2	tr|A0A0C7SWP2|A0A0C7SWP2_EBVG LMP-2B OS=Epstein-Barr virus (strain GD1) OX=10376 GN=LMP-2B PE=4 SV=1	351	IRCCRYCCYYCLTLESEERPP
0.25	G3CKP8	tr|G3CKP8|G3CKP8_EBVG LMP-2B OS=Epstein-Barr virus (strain GD1) OX=10376 GN=LMP2 PE=4 SV=1	351	IRCCRYCCYYCLTLESEERPP
0.25	D2DEE7	tr|D2DEE7|D2DEE7_CHIKV Togavirin OS=Chikungunya virus OX=37124 GN=SP PE=4 SV=1	772	IPLAALIVLCNCLRLLPCCCK
0.25	V5KTZ4	tr|V5KTZ4|V5KTZ4_EBVG K15 OS=Epstein-Barr virus (strain GD1) OX=10376 GN=LMP-2A PE=4 SV=1	470	IRCCRYCCYYCLTLESEERPP
0.25	K9UR31	tr|K9UR31|K9UR31_EBVG LMP-2B OS=Epstein-Barr virus (strain GD1) OX=10376 GN=LMP-2B PE=4 SV=1	351	IRCCRYCCYYCLTLESEERPP
0.25	A0A1I7PD18	tr|A0A1I7PD18|A0A1I7PD18_CHIKV Togavirin OS=Chikungunya virus OX=37124 GN=SP PE=4 SV=1	772	IPLAALIVLCNCLKLLPCCCK
0.25	A0A2P1ICU3	tr|A0A2P1ICU3|A0A2P1ICU3_HPV16 Probable protein E5 OS=Human papillomavirus type 16 OX=333760 GN=E5 PE=3 SV=1	7	ASTTLLACFLLCFCVLLCVCL
0.25	B4Y4N3	tr|B4Y4N3|B4Y4N3_HBV Large envelope protein OS=Hepatitis B virus OX=10407 GN=S PE=3 SV=1	231	ISSHSPTCCPPICPGCRWMCL
0.25	A0A3R5TZL3	tr|A0A3R5TZL3|A0A3R5TZL3_EBVG LMP-2B OS=Epstein-Barr virus (strain GD1) OX=10376 GN=LMP-2B PE=4 SV=1	351	IRCCRYCCYYCLTLESEERPP
0.25	Q9W884	tr|Q9W884|Q9W884_HPV16 Probable protein E5 OS=Human papillomavirus type 16 OX=333760 GN=E5 PE=3 SV=1	7	ASTTLLACFLLCFCVLLCVCL
0.25	A0A1B2AIM5	tr|A0A1B2AIM5|A0A1B2AIM5_CHIKV Togavirin OS=Chikungunya virus OX=37124 PE=4 SV=1	772	IPLAALIVLCNCLRLLPCCCK
0.25	I6VRY4	tr|I6VRY4|I6VRY4_HPV35 Probable protein E5 OS=Human papillomavirus type 35 OX=10587 GN=E5 PE=3 SV=1	12	LCFLLCFCVLLCLCLLVRSLL
0.25	A0A2P1I6X0	tr|A0A2P1I6X0|A0A2P1I6X0_HPV16 Probable protein E5 OS=Human papillomavirus type 16 OX=333760 GN=E5 PE=3 SV=1	7	ASTTLLACFLLCFCVLLCVCL
0.25	A0A3R5XCD9	tr|A0A3R5XCD9|A0A3R5XCD9_EBVG LMP-2B OS=Epstein-Barr virus (strain GD1) OX=10376 GN=LMP-2B PE=4 SV=1	351	IRCCRYCCYYCLTLESEERPP
0.25	D2K8N2	tr|D2K8N2|D2K8N2_CHIKV Togavirin OS=Chikungunya virus OX=37124 GN=SP PE=4 SV=1	772	IPLAALIVLCNCLRLLPCCCK
0.25	S4SZF8	tr|S4SZF8|S4SZF8_CHIKV Togavirin OS=Chikungunya virus OX=37124 PE=4 SV=1	772	IPLAALIVLCNCLRLLPCCCK
0.25	A0A411KB14	tr|A0A411KB14|A0A411KB14_CHIKV Togavirin OS=Chikungunya virus OX=37124 PE=4 SV=1	772	IPLAALIVLCNCLRLLPCCCK
0.25	A0A5Q0MIC8	tr|A0A5Q0MIC8|A0A5Q0MIC8_9INFB Glycoprotein NB OS=Influenza B virus OX=11520 GN=NB PE=3 SV=1	46	RNNCTNNAIGLCKCIKCSGCE
0.25	A0A0C7SYH1	tr|A0A0C7SYH1|A0A0C7SYH1_EBVG LMP-2B OS=Epstein-Barr virus (strain GD1) OX=10376 GN=LMP-2B PE=4 SV=1	351	IRCCRYCCYYCLTLESEERPP
0.25	A0A5Q0MED8	tr|A0A5Q0MED8|A0A5Q0MED8_9INFB Glycoprotein NB OS=Influenza B virus OX=11520 GN=NB PE=3 SV=1	46	RNNCTNNAIGLCKCIECSGCE
0.25	K9USU3	tr|K9USU3|K9USU3_EBVG K15 OS=Epstein-Barr virus (strain GD1) OX=10376 GN=LMP-2A PE=4 SV=1	470	IRCCRYCCYYCLTLESEERPP
0.25	A0A286S4J4	tr|A0A286S4J4|A0A286S4J4_CHIKV Togavirin OS=Chikungunya virus OX=37124 PE=4 SV=1	772	IPLAALIVLCNCLRLLPCCCK
0.25	A0A1D6YNZ0	tr|A0A1D6YNZ0|A0A1D6YNZ0_CHIKV Togavirin OS=Chikungunya virus OX=37124 GN=gp3 PE=4 SV=1	788	PCCCKMLTFLAVLSRRCPHCE
0.25	I6QNB5	tr|I6QNB5|I6QNB5_CHIKV Togavirin OS=Chikungunya virus OX=37124 PE=4 SV=1	772	IPLAALIVLCNCLRLLPCCCK
0.25	A0A0C7TJ58	tr|A0A0C7TJ58|A0A0C7TJ58_EBVG LMP-2B OS=Epstein-Barr virus (strain GD1) OX=10376 GN=LMP-2B PE=4 SV=1	351	IRCCRYCCYYCLTLESEERPP
0.25	A0A0C7P0V5	tr|A0A0C7P0V5|A0A0C7P0V5_EBVG K15 OS=Epstein-Barr virus (strain GD1) OX=10376 GN=LMP-2A PE=4 SV=1	470	IRCCRYCCYYCLTLESEERPP
0.25	A0A4V1G8K0	tr|A0A4V1G8K0|A0A4V1G8K0_9INFB Glycoprotein NB OS=Influenza B virus OX=11520 GN=NB PE=3 SV=1	46	RNNCTNNAIGLCKRIKCSCCE
0.25	A0A2P1I7L1	tr|A0A2P1I7L1|A0A2P1I7L1_HPV16 Probable protein E5 OS=Human papillomavirus type 16 OX=333760 GN=E5 PE=3 SV=1	7	ASTTLLACFLLCFCVLLCVCL
0.25	A0A3R5T732	tr|A0A3R5T732|A0A3R5T732_CHIKV Togavirin OS=Chikungunya virus OX=37124 PE=4 SV=1	772	IPLAALIVLCNCLRLLPCCCK
0.25	A0A1V0EQD0	tr|A0A1V0EQD0|A0A1V0EQD0_CHIKV Togavirin OS=Chikungunya virus OX=37124 GN=gp3 PE=4 SV=1	788	PCCCKMLTFLAVLSRRCPHCE
0.25	V5KUD9	tr|V5KUD9|V5KUD9_EBVG LMP-2B OS=Epstein-Barr virus (strain GD1) OX=10376 GN=LMP-2B PE=4 SV=1	351	IRCCRYCCYYCLTLESEERPP
0.25	A0A2R2WU32	tr|A0A2R2WU32|A0A2R2WU32_CHIKV Togavirin OS=Chikungunya virus OX=37124 PE=4 SV=1	772	IPLAALIVLCNCLRLLPCCCK
0.25	A0A286S112	tr|A0A286S112|A0A286S112_CHIKV Togavirin OS=Chikungunya virus OX=37124 PE=4 SV=1	772	IPLAALIVLCNCLRLLPCCCK
0.25	H2ETA6	tr|H2ETA6|H2ETA6_CHIKV Togavirin OS=Chikungunya virus OX=37124 PE=4 SV=1	772	IPLAALIVLCNCLRLLPCCCK
0.25	A0A291I903	tr|A0A291I903|A0A291I903_CHIKV Togavirin OS=Chikungunya virus OX=37124 PE=4 SV=1	772	IPLAALIVLCNCLRLLPCCCK
0.25	A0A0R8HJY6	tr|A0A0R8HJY6|A0A0R8HJY6_ORFV Uncharacterized protein OS=Orf virus OX=10258 GN=ORFV120 PE=4 SV=1	140	YKQGLCNCFCKMFPCCKELKD
0.25	A0A384KTS9	tr|A0A384KTS9|A0A384KTS9_HPV16 Probable protein E5 OS=Human papillomavirus type 16 OX=333760 GN=E5 PE=3 SV=1	7	ASTTLLACFLLCFCVLLCVCL
0.25	A0A0F6QIY2	tr|A0A0F6QIY2|A0A0F6QIY2_EBVG K15 protein OS=Epstein-Barr virus (strain GD1) OX=10376 GN=LMP2 PE=4 SV=1	470	IRCCRYCCYYCLTLESEERPP
0.25	A0A0U3U6Z1	tr|A0A0U3U6Z1|A0A0U3U6Z1_EBVG LMP-2B OS=Epstein-Barr virus (strain GD1) OX=10376 GN=LMP-2B PE=4 SV=1	351	IRCCRYCCYYCLTLESEERPP
0.25	D2KBQ6	tr|D2KBQ6|D2KBQ6_CHIKV Togavirin OS=Chikungunya virus OX=37124 PE=4 SV=1	772	IPLAALIVLCNCLRLLPCCCK
0.25	V5KTU6	tr|V5KTU6|V5KTU6_EBVG K15 OS=Epstein-Barr virus (strain GD1) OX=10376 GN=LMP-2A PE=4 SV=1	470	IRCCRYCCYYCLTLESEERPP
0.25	I6MCV7	tr|I6MCV7|I6MCV7_CHIKV Togavirin OS=Chikungunya virus OX=37124 PE=4 SV=1	772	IPLAALIVLCNCLRLLPCCCK
0.25	A0A088CCR7	tr|A0A088CCR7|A0A088CCR7_CHIKV Togavirin OS=Chikungunya virus OX=37124 PE=4 SV=1	772	IPLAALIVLCNCLRLLPCCCK
0.25	D2KBQ2	tr|D2KBQ2|D2KBQ2_CHIKV Togavirin OS=Chikungunya virus OX=37124 PE=1 SV=1	772	IPLAALIVLCNCLRLLPCCCK
0.25	A0A2P1ICB7	tr|A0A2P1ICB7|A0A2P1ICB7_HPV16 Probable protein E5 OS=Human papillomavirus type 16 OX=333760 GN=E5 PE=3 SV=1	7	ASTTLLACFLLCFCVLLCVCL
0.25	Q9WGD7	tr|Q9WGD7|Q9WGD7_HPV16 Probable protein E5 OS=Human papillomavirus type 16 OX=333760 GN=E5 PE=3 SV=1	7	ASTTLLACFLLCFCVLLCVCL
0.25	A0A2P1HSF8	tr|A0A2P1HSF8|A0A2P1HSF8_HPV16 Probable protein E5 OS=Human papillomavirus type 16 OX=333760 GN=E5 PE=3 SV=1	7	ASTTLLACFLLCFCVLLCVCL
0.25	F8S4L9	tr|F8S4L9|F8S4L9_HPV35 Probable protein E5 OS=Human papillomavirus type 35 OX=10587 GN=E5 PE=3 SV=1	10	VLLCFLLCFCVLLCLCLLVRS
0.25	A0A1V0EQR8	tr|A0A1V0EQR8|A0A1V0EQR8_CHIKV Togavirin OS=Chikungunya virus OX=37124 GN=gp3 PE=4 SV=1	788	PCCCKMLTFLAVLSRRCPHCE
0.25	A0A0C7SXB0	tr|A0A0C7SXB0|A0A0C7SXB0_EBVG K15 OS=Epstein-Barr virus (strain GD1) OX=10376 GN=LMP-2A PE=4 SV=1	470	IRCCRYCCYYCLTLESEERPP
0.25	A0A5J6SFF4	tr|A0A5J6SFF4|A0A5J6SFF4_ADE02 E3A OS=Human adenovirus C serotype 2 OX=10515 PE=4 SV=1	35	LCLRVAACCTHVCTYCQLFKR
0.25	A0A0C7THU9	tr|A0A0C7THU9|A0A0C7THU9_EBVG K15 OS=Epstein-Barr virus (strain GD1) OX=10376 GN=LMP-2A PE=4 SV=1	470	IRCCRYCCYYCLTLESEERPP
0.25	A0A3R5TW29	tr|A0A3R5TW29|A0A3R5TW29_EBVG LMP-2B OS=Epstein-Barr virus (strain GD1) OX=10376 GN=LMP-2B PE=4 SV=1	351	IRCCRYCCYYCLTLESEERPP
0.25	I1YNZ6	tr|I1YNZ6|I1YNZ6_EBVG K15 OS=Epstein-Barr virus (strain GD1) OX=10376 GN=LMP-2A PE=4 SV=1	470	IRCCRYCCYYCLTLESEERPP
0.25	V5KU25	tr|V5KU25|V5KU25_EBVG LMP-2B OS=Epstein-Barr virus (strain GD1) OX=10376 GN=LMP-2B PE=4 SV=1	351	IRCCRYCCYYCLTLESEERPP
0.25	A0A410IWC3	tr|A0A410IWC3|A0A410IWC3_EBVG LMP-2B OS=Epstein-Barr virus (strain GD1) OX=10376 GN=LMP-2B PE=4 SV=1	351	IRCCRYCCYYCLTLESEERPP
0.25	A0A2I7M8F8	tr|A0A2I7M8F8|A0A2I7M8F8_9INFB Glycoprotein NB OS=Influenza B virus OX=11520 GN=NB PE=3 SV=1	46	RSNCTNDAIGLCKCIKCPGCE
0.25	A0A0C7T6E5	tr|A0A0C7T6E5|A0A0C7T6E5_EBVG LMP-2B OS=Epstein-Barr virus (strain GD1) OX=10376 GN=LMP-2B PE=4 SV=1	351	IRCCRYCCYYCLTLESEERPP
0.25	A0A1S5VGD3	tr|A0A1S5VGD3|A0A1S5VGD3_CVHOC Spike glycoprotein OS=Human coronavirus OC43 OX=31631 GN=S PE=3 SV=1	1326	CTGCGTSCFKKCGGFCDDYTG
0.25	A0A0C7TAW2	tr|A0A0C7TAW2|A0A0C7TAW2_EBVG K15 OS=Epstein-Barr virus (strain GD1) OX=10376 GN=LMP-2A PE=4 SV=1	470	IRCCRYCCYYCLTLESEERPP
0.25	A0A3R5TUT1	tr|A0A3R5TUT1|A0A3R5TUT1_EBVG LMP-2B OS=Epstein-Barr virus (strain GD1) OX=10376 GN=LMP-2B PE=4 SV=1	351	IRCCRYCCYYCLTLESEERPP
0.25	A0A0C7T7P5	tr|A0A0C7T7P5|A0A0C7T7P5_EBVG K15 OS=Epstein-Barr virus (strain GD1) OX=10376 GN=LMP-2A PE=4 SV=1	470	IRCCRYCCYYCLTLESEERPP
0.25	A0A0C7U069	tr|A0A0C7U069|A0A0C7U069_EBVG LMP-2B OS=Epstein-Barr virus (strain GD1) OX=10376 GN=LMP-2B PE=4 SV=1	351	IRCCRYCCYYCLTLESEERPP
0.25	A0A0C7TYJ3	tr|A0A0C7TYJ3|A0A0C7TYJ3_EBVG LMP-2B OS=Epstein-Barr virus (strain GD1) OX=10376 GN=LMP-2B PE=4 SV=1	351	IRCCRYCCYYCLTLESEERPP
0.25	Q52YI4	tr|Q52YI4|Q52YI4_HBV HBsAg (Fragment) OS=Hepatitis B virus OX=10407 PE=4 SV=1	21	SMYPSCCCTKPSDGNCTCIPI
0.25	A0A1U9ALM4	tr|A0A1U9ALM4|A0A1U9ALM4_ADE02 E3 CR1-alphap0 OS=Human adenovirus C serotype 2 OX=10515 PE=4 SV=1	35	LCLRVAACCTHVCTYCQLFKR
0.25	A0A1V0EPK0	tr|A0A1V0EPK0|A0A1V0EPK0_CHIKV Togavirin OS=Chikungunya virus OX=37124 GN=gp3 PE=4 SV=1	788	PCCCKMLTFLAVLSRRCPHCE
0.25	A0A1V0EPZ6	tr|A0A1V0EPZ6|A0A1V0EPZ6_CHIKV Togavirin OS=Chikungunya virus OX=37124 GN=gp3 PE=4 SV=1	788	PCCCKMLTFLAVLSRRCPHCE
0.25	A0A292QAQ2	tr|A0A292QAQ2|A0A292QAQ2_CHIKV Spike glycoprotein E2 (Fragment) OS=Chikungunya virus OX=37124 GN=E2-6k-E1 PE=4 SV=1	447	IPLAALIVLCNCLRLLPCCCK
0.25	A0A0A7A8P6	tr|A0A0A7A8P6|A0A0A7A8P6_CHIKV Togavirin OS=Chikungunya virus OX=37124 PE=4 SV=1	772	IPLAALIVLCNCLRLLPCCCK
0.25	A0A2P1I3L5	tr|A0A2P1I3L5|A0A2P1I3L5_HPV16 Probable protein E5 OS=Human papillomavirus type 16 OX=333760 GN=E5 PE=3 SV=1	7	ASTTLLACFLLCFCVLLCVCL
0.25	A0A2P1IJK3	tr|A0A2P1IJK3|A0A2P1IJK3_HPV16 Probable protein E5 OS=Human papillomavirus type 16 OX=333760 GN=E5 PE=3 SV=1	7	TSTTLLACFLLCFCVLLCVCL
0.25	J3UER3	tr|J3UER3|J3UER3_HPV16 Probable protein E5 OS=Human papillomavirus type 16 OX=333760 GN=E5 PE=3 SV=1	7	ASTTLLACFLLCFCVLLCVCL
0.25	Q77AC7	tr|Q77AC7|Q77AC7_HPV16 Probable protein E5 (Fragment) OS=Human papillomavirus type 16 OX=333760 GN=E5 PE=3 SV=1	8	CFLLCFCVLLCVCLLIRPLLL
0.25	A0A2P1IBQ3	tr|A0A2P1IBQ3|A0A2P1IBQ3_HPV16 Probable protein E5 OS=Human papillomavirus type 16 OX=333760 GN=E5 PE=3 SV=1	7	ASTTLLACFLLCFCVLLCVCL
0.25	A0A2P1IGL4	tr|A0A2P1IGL4|A0A2P1IGL4_HPV16 Probable protein E5 OS=Human papillomavirus type 16 OX=333760 GN=E5 PE=3 SV=1	7	ASTTLLACFLLCFCVLLCVCL
0.25	A6MH21	tr|A6MH21|A6MH21_CHIKV Togavirin OS=Chikungunya virus OX=37124 PE=4 SV=1	772	IPLAALIVLCNCLRLLPCCCK
0.25	A0A1V0EQU2	tr|A0A1V0EQU2|A0A1V0EQU2_CHIKV Togavirin OS=Chikungunya virus OX=37124 GN=gp3 PE=4 SV=1	788	PCCCKMLTFLAVLSRRCPHCE
0.25	A0A411HR03	tr|A0A411HR03|A0A411HR03_CHIKV Togavirin OS=Chikungunya virus OX=37124 GN=gp3 PE=4 SV=1	788	PCCCKTMAFLAVMSRRCPHCE
0.25	A0A292QBK3	tr|A0A292QBK3|A0A292QBK3_CHIKV Spike glycoprotein E2 (Fragment) OS=Chikungunya virus OX=37124 GN=E2-6k-E1 PE=4 SV=1	447	IPLAALIVLCNCLRLLPCCCK
0.25	A0A292Q9W9	tr|A0A292Q9W9|A0A292Q9W9_CHIKV Spike glycoprotein E2 (Fragment) OS=Chikungunya virus OX=37124 GN=E2-6k-E1 PE=4 SV=1	447	IPLAALIVLCNCLRLLPCCCK
0.25	G0LWX5	tr|G0LWX5|G0LWX5_CHIKV Spike glycoprotein E2 (Fragment) OS=Chikungunya virus OX=37124 GN=E2-6K-E1 PE=4 SV=1	447	IPLAALIVLCNCLRLLPCCCK
0.25	A0A1Y0KDP7	tr|A0A1Y0KDP7|A0A1Y0KDP7_CHIKV Togavirin OS=Chikungunya virus OX=37124 PE=4 SV=1	772	IPLAALIVLCNCLRLLPCCCK
0.25	A0A125QWD2	tr|A0A125QWD2|A0A125QWD2_CHIKV Envelope E1 (Fragment) OS=Chikungunya virus OX=37124 PE=4 SV=1	60	IPLAALIVLCNCLRLLPCCCK
0.25	A0A1V0EQM0	tr|A0A1V0EQM0|A0A1V0EQM0_CHIKV Togavirin OS=Chikungunya virus OX=37124 GN=gp3 PE=4 SV=1	788	PCCCKMLTFLAVLSRRCPHCE
0.25	A0A0S2XIV2	tr|A0A0S2XIV2|A0A0S2XIV2_CHIKV Spike glycoprotein E2 (Fragment) OS=Chikungunya virus OX=37124 PE=4 SV=1	447	IPLAALIVLCNCLRLLPCCCK
0.25	A0A4D6GTC7	tr|A0A4D6GTC7|A0A4D6GTC7_CHIKV Togavirin OS=Chikungunya virus OX=37124 PE=4 SV=1	772	IPLAALIVLCNCLRLLPCCCK
0.25	A0A510C2Y3	tr|A0A510C2Y3|A0A510C2Y3_CHIKV Togavirin OS=Chikungunya virus OX=37124 GN=SP PE=4 SV=1	788	PCCCKTLAFLSRNEHRCPHCE
0.25	A6MH23	tr|A6MH23|A6MH23_CHIKV Togavirin OS=Chikungunya virus OX=37124 PE=4 SV=1	772	IPLAALIVLCNCLRLLPCCCK
0.25	A0A6B7H904	tr|A0A6B7H904|A0A6B7H904_CHIKV Togavirin OS=Chikungunya virus OX=37124 PE=4 SV=1	772	IPLAALIVLCNCLRLLPCCCK
0.25	A0A6B9KBH0	tr|A0A6B9KBH0|A0A6B9KBH0_CHIKV Togavirin (Fragment) OS=Chikungunya virus OX=37124 PE=4 SV=1	638	IPLAALIVLCNCLRLLPCCCK
0.25	D7R992	tr|D7R992|D7R992_CHIKV Togavirin OS=Chikungunya virus OX=37124 GN=CHIKVgp2 PE=4 SV=1	772	IPLAALIVLCNCLKLLPCCCK
0.25	A0A6B7H6U1	tr|A0A6B7H6U1|A0A6B7H6U1_CHIKV Togavirin OS=Chikungunya virus OX=37124 PE=4 SV=1	772	IPLAALIVLCNCLRLLPCCCK
0.25	H8XW52	tr|H8XW52|H8XW52_CHIKV Togavirin OS=Chikungunya virus OX=37124 PE=4 SV=1	772	IPLAALIVLCNCLRLLPCCCK
0.25	A0A127XZN0	tr|A0A127XZN0|A0A127XZN0_CHIKV Togavirin OS=Chikungunya virus OX=37124 PE=4 SV=1	772	IPLAALIVLCNCLRLLPCCCK
0.25	D2CY31	tr|D2CY31|D2CY31_CHIKV Togavirin OS=Chikungunya virus OX=37124 PE=4 SV=1	772	IPLAALIVLCNCLRLLPCCCK
0.25	A0A6B9RTT5	tr|A0A6B9RTT5|A0A6B9RTT5_CHIKV Togavirin OS=Chikungunya virus OX=37124 PE=4 SV=1	772	IPLAALIVLCNCLRLLPCCCK
0.25	D2CY27	tr|D2CY27|D2CY27_CHIKV Togavirin OS=Chikungunya virus OX=37124 PE=4 SV=1	772	IPLAALIVLCNCLRLVPCCCK
0.25	A0A0G2T7D1	tr|A0A0G2T7D1|A0A0G2T7D1_HCMV Protein UL133 OS=Human cytomegalovirus OX=10359 GN=UL133 PE=4 SV=1	76	IDLLTCRWVRYCSCSFKCSCK
0.25	A0A344MND6	tr|A0A344MND6|A0A344MND6_CHIKV Structural polyprotein (Fragment) OS=Chikungunya virus OX=37124 PE=4 SV=1	247	IPLAALIVLCNCLRLLPCCCK
0.25	A0A223FSI4	tr|A0A223FSI4|A0A223FSI4_CHIKV Structural polyprotein (Fragment) OS=Chikungunya virus OX=37124 PE=4 SV=1	106	IPLAALIVLCNCLRLLPCCCK
0.25	A4L792	tr|A4L792|A4L792_CHIKV Polyprotein (Fragment) OS=Chikungunya virus OX=37124 PE=4 SV=1	63	IPLAALIVLCNCLRLLPCCCK
0.25	S4T010	tr|S4T010|S4T010_CHIKV Togavirin (Fragment) OS=Chikungunya virus OX=37124 PE=4 SV=1	772	IPLAALIVLCNCLRLLPCCCK
0.25	A0A0S2XIS6	tr|A0A0S2XIS6|A0A0S2XIS6_CHIKV Spike glycoprotein E2 (Fragment) OS=Chikungunya virus OX=37124 PE=4 SV=1	447	IPLAALIVLCNCLRLLPCCCK
0.25	A0A1B2AIL5	tr|A0A1B2AIL5|A0A1B2AIL5_CHIKV Togavirin OS=Chikungunya virus OX=37124 PE=4 SV=1	772	IPLAALIVLCNCLRLLPCCCK
0.25	A0A1V0EQA3	tr|A0A1V0EQA3|A0A1V0EQA3_CHIKV Togavirin OS=Chikungunya virus OX=37124 GN=gp3 PE=4 SV=1	788	PCCCKMLTFLAVLSRRCPHCE
0.25	D1GCB1	tr|D1GCB1|D1GCB1_CHIKV Togavirin OS=Chikungunya virus OX=37124 PE=4 SV=1	772	IPLAALIVLCNCLRLIPCCCK
0.25	H8XW56	tr|H8XW56|H8XW56_CHIKV Togavirin OS=Chikungunya virus OX=37124 PE=4 SV=1	772	IPLAALIVLCNCLRLLPCCCK
0.25	A0A292QBZ0	tr|A0A292QBZ0|A0A292QBZ0_CHIKV Spike glycoprotein E2 (Fragment) OS=Chikungunya virus OX=37124 GN=E2-6k-E1 PE=4 SV=1	447	IPLAALIVLCNCLRLLPCCCK
0.25	V5UMV1	tr|V5UMV1|V5UMV1_CHIKV Togavirin OS=Chikungunya virus OX=37124 PE=4 SV=1	772	IPLAALIVLCNCLRLLPCCCK
0.25	A0A1Y0B7S8	tr|A0A1Y0B7S8|A0A1Y0B7S8_CHIKV Togavirin OS=Chikungunya virus OX=37124 PE=4 SV=1	772	IPLAALIVLCNCLRLLPCCCK
0.25	A0A292QAN8	tr|A0A292QAN8|A0A292QAN8_CHIKV Spike glycoprotein E2 (Fragment) OS=Chikungunya virus OX=37124 GN=E2-6k-E1 PE=4 SV=1	447	IPLAALIVLCNCLRLLPCCCK
0.25	D1GCC5	tr|D1GCC5|D1GCC5_CHIKV Togavirin OS=Chikungunya virus OX=37124 PE=4 SV=1	772	IPLAALIVLCNCLRLLPCCCK
0.25	A0A3R5T743	tr|A0A3R5T743|A0A3R5T743_CHIKV Togavirin OS=Chikungunya virus OX=37124 PE=4 SV=1	772	IPLAALIVLCNCLRLLPCCCK
0.25	A0A6B9KBE1	tr|A0A6B9KBE1|A0A6B9KBE1_CHIKV Togavirin OS=Chikungunya virus OX=37124 PE=4 SV=1	772	IPLAALIVLCNCLRLLPCCCK
0.25	R9RW17	tr|R9RW17|R9RW17_CHIKV E1 protein (Fragment) OS=Chikungunya virus OX=37124 PE=4 SV=1	29	IPLAALIVLCNCLRLLPCCCK
0.25	A0A6B7H7P5	tr|A0A6B7H7P5|A0A6B7H7P5_CHIKV Togavirin OS=Chikungunya virus OX=37124 PE=4 SV=1	772	IPLAALIVLCNCLRLLPCCCK
0.25	D7R990	tr|D7R990|D7R990_CHIKV Togavirin OS=Chikungunya virus OX=37124 GN=CHIKVgp2 PE=4 SV=1	772	IPLAALIVLCNCLRLLPCCCK
0.25	J3UEG8	tr|J3UEG8|J3UEG8_HPV16 Probable protein E5 OS=Human papillomavirus type 16 OX=333760 GN=E5 PE=3 SV=1	7	ASTTLLACFLLCFCVLLCVCL
0.25	A0A2P1HJ58	tr|A0A2P1HJ58|A0A2P1HJ58_HPV16 Probable protein E5 OS=Human papillomavirus type 16 OX=333760 GN=E5 PE=3 SV=1	9	TTLLACFLLCFCVLLCVCLLI
0.25	Q77AA0	tr|Q77AA0|Q77AA0_HPV16 Probable protein E5 (Fragment) OS=Human papillomavirus type 16 OX=333760 GN=E5 PE=3 SV=1	8	CFLLCFCVLLCVCLLIRPLLL
0.25	Q77AA8	tr|Q77AA8|Q77AA8_HPV16 Probable protein E5 (Fragment) OS=Human papillomavirus type 16 OX=333760 GN=E5 PE=3 SV=1	8	CFLLCFCVLLCVCLLIRPLLL
0.25	Q77AD3	tr|Q77AD3|Q77AD3_HPV16 Probable protein E5 (Fragment) OS=Human papillomavirus type 16 OX=333760 GN=E5 PE=3 SV=1	8	CFLLCFCVLLCVCLLIRPLLL
0.25	Q77AC5	tr|Q77AC5|Q77AC5_HPV16 Probable protein E5 (Fragment) OS=Human papillomavirus type 16 OX=333760 GN=E5 PE=3 SV=1	8	CFLLCFCVLLCVCLLIRPLLL
0.25	A0A2P1HFI2	tr|A0A2P1HFI2|A0A2P1HFI2_HPV16 Probable protein E5 OS=Human papillomavirus type 16 OX=333760 GN=E5 PE=3 SV=1	7	ASTTLLACFLLCFCVLLCVCL
0.25	A0A2P1I1S4	tr|A0A2P1I1S4|A0A2P1I1S4_HPV16 Probable protein E5 OS=Human papillomavirus type 16 OX=333760 GN=E5 PE=3 SV=1	7	ASTTLLACFLLCFCVLLCVCL
0.25	A0A2P1HRX3	tr|A0A2P1HRX3|A0A2P1HRX3_HPV16 Probable protein E5 OS=Human papillomavirus type 16 OX=333760 GN=E5 PE=3 SV=1	7	ASTTLLACFLLCFCVLLCVCL
0.25	Q77AA7	tr|Q77AA7|Q77AA7_HPV16 Probable protein E5 (Fragment) OS=Human papillomavirus type 16 OX=333760 GN=E5 PE=3 SV=1	8	CFLLCFCVLLCVCLLIRPLLL
0.25	A0A2P1I221	tr|A0A2P1I221|A0A2P1I221_HPV16 Probable protein E5 OS=Human papillomavirus type 16 OX=333760 GN=E5 PE=3 SV=1	7	ASTTLLACFLLCFCVLLCVCL
0.25	D7RGN2	tr|D7RGN2|D7RGN2_HPV16 Probable protein E5 OS=Human papillomavirus type 16 OX=333760 GN=E5 PE=3 SV=1	9	TTLLACFLLCFCVLLCVCLLI
0.25	A0A2P1IDX5	tr|A0A2P1IDX5|A0A2P1IDX5_HPV16 Probable protein E5 OS=Human papillomavirus type 16 OX=333760 GN=E5 PE=3 SV=1	9	TTLLACFLLCFCVLLCVCLLI
0.25	A0A2P1HGU1	tr|A0A2P1HGU1|A0A2P1HGU1_HPV16 Probable protein E5 OS=Human papillomavirus type 16 OX=333760 GN=E5 PE=3 SV=1	7	ASTTLLACFLLCFCVLLCVCL
0.25	A0A2P1HXL3	tr|A0A2P1HXL3|A0A2P1HXL3_HPV16 Probable protein E5 (Fragment) OS=Human papillomavirus type 16 OX=333760 GN=E5 PE=3 SV=1	11	LLACGLLCFCVLLCVCLLIRP
0.25	A0A2P1HVH7	tr|A0A2P1HVH7|A0A2P1HVH7_HPV16 Probable protein E5 OS=Human papillomavirus type 16 OX=333760 GN=E5 PE=3 SV=1	7	ASTTLLACFLLCFCVLLCVCL
0.25	A0A2P1HUQ5	tr|A0A2P1HUQ5|A0A2P1HUQ5_HPV16 Probable protein E5 OS=Human papillomavirus type 16 OX=333760 GN=E5 PE=3 SV=1	7	ASTTLLACFLLCFCVLLCVCL
0.25	A0A4D6GPP8	tr|A0A4D6GPP8|A0A4D6GPP8_CHIKV Togavirin OS=Chikungunya virus OX=37124 PE=4 SV=1	772	IPLAALIVLCNCLRLLPCCCK
0.25	A0A292QBH6	tr|A0A292QBH6|A0A292QBH6_CHIKV Spike glycoprotein E2 (Fragment) OS=Chikungunya virus OX=37124 GN=E2-6k-E1 PE=4 SV=1	447	IPLAALIVLCNCLRLLPCCCK
0.25	A0A6B9QPT4	tr|A0A6B9QPT4|A0A6B9QPT4_CHIKV Togavirin OS=Chikungunya virus OX=37124 PE=4 SV=1	772	IPLAALIVLCNCLRLLPCCCK
0.25	A0A292QBW4	tr|A0A292QBW4|A0A292QBW4_CHIKV Spike glycoprotein E2 (Fragment) OS=Chikungunya virus OX=37124 GN=E2-6k-E1 PE=4 SV=1	447	IPLAALIVLCNCLRLLPCCCK
0.25	A0A1V0EQW9	tr|A0A1V0EQW9|A0A1V0EQW9_CHIKV Togavirin OS=Chikungunya virus OX=37124 GN=gp3 PE=4 SV=1	788	PCCCKMLTFLAVLSRRCPHCE
0.25	A0A6B9M2T4	tr|A0A6B9M2T4|A0A6B9M2T4_CHIKV Togavirin OS=Chikungunya virus OX=37124 PE=4 SV=1	772	IPLAALIVLCNCLRLLPCCCK
0.25	E2ES96	tr|E2ES96|E2ES96_EBVG Latent membrane protein 2A (Fragment) OS=Epstein-Barr virus (strain GD1) OX=10376 GN=LMP2A PE=4 SV=1	351	IRCCRYCCYYCLTLESEERPP
0.25	S5ZIG0	tr|S5ZIG0|S5ZIG0_CHIKV Togavirin OS=Chikungunya virus OX=37124 PE=4 SV=1	772	IPLAALIVLCNCLRLLPCCCK
0.25	I6QYV4	tr|I6QYV4|I6QYV4_CHIKV Togavirin OS=Chikungunya virus OX=37124 PE=4 SV=1	772	IPLAALIVLCNCLRLLPCCCK
0.25	A0A0S2XIR5	tr|A0A0S2XIR5|A0A0S2XIR5_CHIKV Spike glycoprotein E2 (Fragment) OS=Chikungunya virus OX=37124 PE=4 SV=1	447	IPLAALIVLCNCLRLLPCCCK
0.25	D7R948	tr|D7R948|D7R948_CHIKV Togavirin OS=Chikungunya virus OX=37124 GN=CHIKVgp2 PE=4 SV=1	772	IPLAALIVLCNCLRLLPCCCK
0.25	A0A344MND7	tr|A0A344MND7|A0A344MND7_CHIKV Structural polyprotein (Fragment) OS=Chikungunya virus OX=37124 PE=4 SV=1	247	IPLAALIVLCNCLRLLPCCCK
0.25	A0A292QBY5	tr|A0A292QBY5|A0A292QBY5_CHIKV Spike glycoprotein E2 (Fragment) OS=Chikungunya virus OX=37124 GN=E2-6k-E1 PE=4 SV=1	447	IPLAALIVLCNCLRLLPCCCK
0.25	C7G0W5	tr|C7G0W5|C7G0W5_CHIKV Togavirin OS=Chikungunya virus OX=37124 PE=4 SV=1	772	IPLAALIVLCNCLRLLPCCCK
0.25	A0A1V0EQB7	tr|A0A1V0EQB7|A0A1V0EQB7_CHIKV Togavirin OS=Chikungunya virus OX=37124 GN=gp3 PE=4 SV=1	788	PCCCKMLTFLAVLSRRCPHCE
0.25	A0A292Q9X9	tr|A0A292Q9X9|A0A292Q9X9_CHIKV Spike glycoprotein E2 (Fragment) OS=Chikungunya virus OX=37124 GN=E2-6k-E1 PE=4 SV=1	447	IPLAALIVLCNCLRLLPCCCK
0.25	A0A344MND5	tr|A0A344MND5|A0A344MND5_CHIKV Structural polyprotein (Fragment) OS=Chikungunya virus OX=37124 PE=4 SV=1	247	IPLAALIVLCNCLRLLPCCCK
0.25	A0A1I7PD12	tr|A0A1I7PD12|A0A1I7PD12_CHIKV Togavirin OS=Chikungunya virus OX=37124 GN=gp3 PE=4 SV=1	788	PCCCKTLAFLAVMSRRCPHCE
0.25	A0A1U9VWY7	tr|A0A1U9VWY7|A0A1U9VWY7_CHIKV Togavirin OS=Chikungunya virus OX=37124 GN=gp3 PE=4 SV=1	788	PCCCKTLAFLAVMSRRCPHCE
0.25	A0A292QBC5	tr|A0A292QBC5|A0A292QBC5_CHIKV Spike glycoprotein E2 (Fragment) OS=Chikungunya virus OX=37124 GN=E2-6k-E1 PE=4 SV=1	447	IPLAALIVLCNCLRLLPCCCK
0.25	A0A292QBW8	tr|A0A292QBW8|A0A292QBW8_CHIKV Spike glycoprotein E2 (Fragment) OS=Chikungunya virus OX=37124 GN=E2-6k-E1 PE=4 SV=1	447	IPLAALIVLCNCLRLLPCCCK
0.25	A0A6B9RTY9	tr|A0A6B9RTY9|A0A6B9RTY9_CHIKV Togavirin OS=Chikungunya virus OX=37124 PE=4 SV=1	772	IPLAALIVLCNCLRLLPCCCK
0.25	A0A0S2XIQ9	tr|A0A0S2XIQ9|A0A0S2XIQ9_CHIKV Togavirin OS=Chikungunya virus OX=37124 PE=4 SV=1	772	IPLAALIVLCNCLRLLPCCCK
0.25	H8XW57	tr|H8XW57|H8XW57_CHIKV Togavirin OS=Chikungunya virus OX=37124 PE=4 SV=1	772	IPLAALIVLCNCLRLLPCCCK
0.25	A0A292Q9Z0	tr|A0A292Q9Z0|A0A292Q9Z0_CHIKV Spike glycoprotein E2 (Fragment) OS=Chikungunya virus OX=37124 GN=E2-6k-E1 PE=4 SV=1	447	IPLAALIVLCNCLRLLPCCCK
0.25	A0A221S5W8	tr|A0A221S5W8|A0A221S5W8_CHIKV E1 (Fragment) OS=Chikungunya virus OX=37124 PE=4 SV=1	106	IPLAALIVLCNCLRLLPCCCK
0.25	A0A4D6GPR6	tr|A0A4D6GPR6|A0A4D6GPR6_CHIKV Togavirin OS=Chikungunya virus OX=37124 PE=4 SV=1	772	IPLAALIVLCNCLRLLPCCCK
0.25	E2ES80	tr|E2ES80|E2ES80_EBVG Latent membrane protein 2A (Fragment) OS=Epstein-Barr virus (strain GD1) OX=10376 GN=LMP2A PE=4 SV=1	351	IRCCRYCCYYCLTLESEERPP
0.25	A0A0C7T920	tr|A0A0C7T920|A0A0C7T920_EBVG K15 OS=Epstein-Barr virus (strain GD1) OX=10376 GN=LMP-2A PE=4 SV=1	470	IRCCRYCCYYCLTLESEERPP
0.25	A0A292Q9Y8	tr|A0A292Q9Y8|A0A292Q9Y8_CHIKV Spike glycoprotein E2 (Fragment) OS=Chikungunya virus OX=37124 GN=E2-6k-E1 PE=4 SV=1	447	IPLAALIVLCNCLRLLPCCCK
0.25	A0A0S2XIT2	tr|A0A0S2XIT2|A0A0S2XIT2_CHIKV Spike glycoprotein E2 (Fragment) OS=Chikungunya virus OX=37124 PE=4 SV=1	447	IPLAALIVLCNCLRLLPCCCK
0.25	A0A2I7YVH3	tr|A0A2I7YVH3|A0A2I7YVH3_CHIKV Togavirin OS=Chikungunya virus OX=37124 PE=4 SV=1	772	IPLAALIVLCNCLRLLPCCCK
0.25	A0A411JJU1	tr|A0A411JJU1|A0A411JJU1_CHIKV Togavirin OS=Chikungunya virus OX=37124 GN=gp3 PE=4 SV=1	788	PCCCKMLTFLAVLSRRCPHCE
0.25	G0YZA2	tr|G0YZA2|G0YZA2_CHIKV Togavirin OS=Chikungunya virus OX=37124 PE=4 SV=1	772	IPLAALIVLCNCLRLLPCCCK
0.25	A0A4D6GPE6	tr|A0A4D6GPE6|A0A4D6GPE6_CHIKV Togavirin OS=Chikungunya virus OX=37124 PE=4 SV=1	772	IPLAALIVLCNCLRLLPCCCK
0.25	D7R970	tr|D7R970|D7R970_CHIKV Togavirin OS=Chikungunya virus OX=37124 GN=CHIKVgp2 PE=4 SV=1	772	IPLAALIVLCNCLKLLPCCCK
0.25	D7R9A0	tr|D7R9A0|D7R9A0_CHIKV Togavirin OS=Chikungunya virus OX=37124 GN=CHIKVgp2 PE=4 SV=1	772	IPLAALIVLCNCLRLLPCCCK
0.25	I6R180	tr|I6R180|I6R180_CHIKV Togavirin (Fragment) OS=Chikungunya virus OX=37124 PE=4 SV=1	772	IPLAALIVLCNCLRLLPCCCK
0.25	A0A411HR31	tr|A0A411HR31|A0A411HR31_CHIKV Togavirin (Fragment) OS=Chikungunya virus OX=37124 GN=SP PE=4 SV=1	725	IPLAALIVLCNCLRLLPCCCK
0.25	A0A292QBX9	tr|A0A292QBX9|A0A292QBX9_CHIKV Spike glycoprotein E2 (Fragment) OS=Chikungunya virus OX=37124 GN=E2-6k-E1 PE=4 SV=1	447	IPLAALIVLCNCLRLLPCCCK
0.25	V5UNM6	tr|V5UNM6|V5UNM6_CHIKV Togavirin OS=Chikungunya virus OX=37124 PE=4 SV=1	772	IPLAALIVLCNCLRLLPCCCK
0.25	A0A411HQU6	tr|A0A411HQU6|A0A411HQU6_CHIKV Togavirin OS=Chikungunya virus OX=37124 GN=gp3 PE=4 SV=1	788	PCCCKTLAFLAVMSRRCPHCE
0.25	A0A6B9QRL2	tr|A0A6B9QRL2|A0A6B9QRL2_CHIKV Togavirin OS=Chikungunya virus OX=37124 PE=4 SV=1	772	IPLAALIVLCNCLRLLPCCCK
0.25	A0A0S2XIQ8	tr|A0A0S2XIQ8|A0A0S2XIQ8_CHIKV Spike glycoprotein E2 (Fragment) OS=Chikungunya virus OX=37124 PE=4 SV=1	447	IPLAALIVLCNCLRLLPCCCK
0.25	H8XW55	tr|H8XW55|H8XW55_CHIKV Togavirin OS=Chikungunya virus OX=37124 PE=4 SV=1	772	IPLAALIVLCNCLRLLPCCCK
0.25	A0A1V0EQB3	tr|A0A1V0EQB3|A0A1V0EQB3_CHIKV Togavirin OS=Chikungunya virus OX=37124 GN=gp3 PE=4 SV=1	788	PCCCKMLTFLAVLSRRCPHCE
0.25	A0A6B9RWW6	tr|A0A6B9RWW6|A0A6B9RWW6_CHIKV Togavirin OS=Chikungunya virus OX=37124 PE=4 SV=1	772	IPLAALIVLCNCLRLLPCCCK
0.25	A0A6B9LTW2	tr|A0A6B9LTW2|A0A6B9LTW2_CHIKV Togavirin OS=Chikungunya virus OX=37124 PE=4 SV=1	772	IPLAALIVLCNCLRLLPCCCK
0.25	A0A4D6GPD7	tr|A0A4D6GPD7|A0A4D6GPD7_CHIKV Togavirin OS=Chikungunya virus OX=37124 PE=4 SV=1	772	IPLAALIVLCNCLRLLPCCCK
0.25	A0A6B9QQ77	tr|A0A6B9QQ77|A0A6B9QQ77_CHIKV Togavirin OS=Chikungunya virus OX=37124 PE=4 SV=1	772	IPLAALIVLCNCLRLLPCCCK
0.25	A0A292QA48	tr|A0A292QA48|A0A292QA48_CHIKV Spike glycoprotein E2 (Fragment) OS=Chikungunya virus OX=37124 GN=E2-6k-E1 PE=4 SV=1	447	IPLAALIVLCNCLRLLPCCCK
0.25	A0A411HQV6	tr|A0A411HQV6|A0A411HQV6_CHIKV Togavirin (Fragment) OS=Chikungunya virus OX=37124 GN=SP PE=4 SV=1	772	IPLAALIVLCNCLRLLPCCCK
0.25	A0A3G4WES3	tr|A0A3G4WES3|A0A3G4WES3_CHIKV Togavirin OS=Chikungunya virus OX=37124 PE=4 SV=1	772	IPLAALIVLCNCLRLLPCCCK
0.25	A0A5B8N399	tr|A0A5B8N399|A0A5B8N399_CHIKV Structural polyprotein (Fragment) OS=Chikungunya virus OX=37124 PE=4 SV=1	114	IPLAALIVLCNCLRLLPCCCK
0.25	A0A0H4CWF2	tr|A0A0H4CWF2|A0A0H4CWF2_CHIKV Togavirin (Fragment) OS=Chikungunya virus OX=37124 PE=1 SV=1	772	IPLAALIVLCNCLRLLPCCCK
0.25	A0A292QBX4	tr|A0A292QBX4|A0A292QBX4_CHIKV Spike glycoprotein E2 (Fragment) OS=Chikungunya virus OX=37124 GN=E2-6k-E1 PE=4 SV=1	447	IPLAALIVLCNCLRLLPCCCK
0.25	A0A221I1Y9	tr|A0A221I1Y9|A0A221I1Y9_CHIKV Togavirin (Fragment) OS=Chikungunya virus OX=37124 PE=4 SV=1	772	IPLAALIVLCNCLRLLPCCCK
0.25	A0A510C2X8	tr|A0A510C2X8|A0A510C2X8_CHIKV Togavirin OS=Chikungunya virus OX=37124 GN=SP PE=4 SV=1	788	PCCCKTLTFLSRNERRCPHCE
0.25	D2CY29	tr|D2CY29|D2CY29_CHIKV Togavirin OS=Chikungunya virus OX=37124 PE=4 SV=1	772	IPLAALIVLCNCLRLLPCCCK
0.25	A0A292QBB9	tr|A0A292QBB9|A0A292QBB9_CHIKV Spike glycoprotein E2 (Fragment) OS=Chikungunya virus OX=37124 GN=E2-6k-E1 PE=4 SV=1	447	IPLAALIVLCNCLRLLPCCCK
0.25	E2ESA7	tr|E2ESA7|E2ESA7_EBVG Latent membrane protein 2A (Fragment) OS=Epstein-Barr virus (strain GD1) OX=10376 GN=LMP2A PE=4 SV=1	351	IRCCRYCCYYCLTLESEERPP
0.25	A0A0C7TZD4	tr|A0A0C7TZD4|A0A0C7TZD4_EBVG LMP-2B OS=Epstein-Barr virus (strain GD1) OX=10376 GN=LMP-2B PE=4 SV=1	351	IRCCRYCCYYCLTLESEERPP
0.25	A0A3R5TZL9	tr|A0A3R5TZL9|A0A3R5TZL9_EBVG LMP-2B OS=Epstein-Barr virus (strain GD1) OX=10376 GN=LMP-2B PE=4 SV=1	351	IRCCRYCCYYCLTLESEERPP
0.25	E2ES95	tr|E2ES95|E2ES95_EBVG Latent membrane protein 2A (Fragment) OS=Epstein-Barr virus (strain GD1) OX=10376 GN=LMP2A PE=4 SV=1	351	IRCCRYCCYYCLTLESEERPP
0.25	E2ES29	tr|E2ES29|E2ES29_EBVG Latent membrane protein 2A (Fragment) OS=Epstein-Barr virus (strain GD1) OX=10376 GN=LMP2A PE=4 SV=1	351	IRCCRYCCYYCLTLESEERPP
0.25	E2ES74	tr|E2ES74|E2ES74_EBVG Latent membrane protein 2A (Fragment) OS=Epstein-Barr virus (strain GD1) OX=10376 GN=LMP2A PE=4 SV=1	351	IRCCRYCCYYCLTLESEERPP
0.25	A0A075FFQ0	tr|A0A075FFQ0|A0A075FFQ0_EBVG K15 OS=Epstein-Barr virus (strain GD1) OX=10376 GN=LMP-2A PE=4 SV=1	470	IRCCRYCCYYCLTLESEERPP
0.25	A0A0C7T2L8	tr|A0A0C7T2L8|A0A0C7T2L8_EBVG LMP-2B OS=Epstein-Barr virus (strain GD1) OX=10376 GN=LMP-2B PE=4 SV=1	351	IRCCRYCCYYCLTLESEERPP
0.25	E2ES36	tr|E2ES36|E2ES36_EBVG Latent membrane protein 2A (Fragment) OS=Epstein-Barr virus (strain GD1) OX=10376 GN=LMP2A PE=4 SV=1	351	IRCCRYCCYYCLTLESEERPP
0.25	A0A1W2KRS3	tr|A0A1W2KRS3|A0A1W2KRS3_CHIKV Togavirin OS=Chikungunya virus OX=37124 GN=gp3 PE=4 SV=1	788	PCCCKTLAFLAVMSRRCPHCE
0.25	W5XLP1	tr|W5XLP1|W5XLP1_CHIKV Togavirin OS=Chikungunya virus OX=37124 PE=4 SV=1	772	IPLAALIVLCNCLRLLPCCCK
0.25	A0A2I7YVG7	tr|A0A2I7YVG7|A0A2I7YVG7_CHIKV Togavirin OS=Chikungunya virus OX=37124 PE=4 SV=1	772	IPLAALIVLCNCLRLLPCCCK
0.25	A0A410I424	tr|A0A410I424|A0A410I424_EBVG LMP-2B (Fragment) OS=Epstein-Barr virus (strain GD1) OX=10376 GN=LMP-2B PE=4 SV=1	49	IRCCRYCCYYCLTLESEERPP
0.25	A0A3R5WX10	tr|A0A3R5WX10|A0A3R5WX10_EBVG LMP-2B OS=Epstein-Barr virus (strain GD1) OX=10376 GN=LMP-2B PE=4 SV=1	351	IRCCRYCCYYCLTLESEERPP
0.25	E2ES84	tr|E2ES84|E2ES84_EBVG Latent membrane protein 2A (Fragment) OS=Epstein-Barr virus (strain GD1) OX=10376 GN=LMP2A PE=4 SV=1	351	IRCCRYCCYYCLTLESEERPP
0.25	E2ES93	tr|E2ES93|E2ES93_EBVG Latent membrane protein 2A (Fragment) OS=Epstein-Barr virus (strain GD1) OX=10376 GN=LMP2A PE=4 SV=1	351	IRCCRYCCYYCLTLESEERPP
0.25	E2ESD0	tr|E2ESD0|E2ESD0_EBVG Latent membrane protein 2A (Fragment) OS=Epstein-Barr virus (strain GD1) OX=10376 GN=LMP2A PE=4 SV=1	351	IRCCRYCCYYCLTLESEERPP
0.25	E2ES64	tr|E2ES64|E2ES64_EBVG Latent membrane protein 2A (Fragment) OS=Epstein-Barr virus (strain GD1) OX=10376 GN=LMP2A PE=4 SV=1	351	IRCCRYCCYYCLTLESEERPP
0.25	E2ES53	tr|E2ES53|E2ES53_EBVG Latent membrane protein 2A (Fragment) OS=Epstein-Barr virus (strain GD1) OX=10376 GN=LMP2A PE=4 SV=1	351	IRCCRYCCYYCLTLESEERPP
0.25	A0A1U9VWZ1	tr|A0A1U9VWZ1|A0A1U9VWZ1_CHIKV Togavirin OS=Chikungunya virus OX=37124 GN=gp3 PE=4 SV=1	788	PCCCKTLAFLAVMSRRCPHCE
0.25	D7R9A2	tr|D7R9A2|D7R9A2_CHIKV Togavirin OS=Chikungunya virus OX=37124 GN=CHIKVgp2 PE=4 SV=1	772	IPLAALIVLCNCLRLLPCCCK
0.25	A0A0C7TVH5	tr|A0A0C7TVH5|A0A0C7TVH5_EBVG K15 OS=Epstein-Barr virus (strain GD1) OX=10376 GN=LMP-2A PE=4 SV=1	470	IRCCRYCCYYCLTLESEERPP
0.25	A0A2D1LY52	tr|A0A2D1LY52|A0A2D1LY52_EBVG Terminal protein LMP2B OS=Epstein-Barr virus (strain GD1) OX=10376 GN=LMP2B PE=4 SV=1	351	IRCCRYCCYYCLTLESEERPP
0.25	A0A0C7TX78	tr|A0A0C7TX78|A0A0C7TX78_EBVG K15 OS=Epstein-Barr virus (strain GD1) OX=10376 GN=LMP-2A PE=4 SV=1	470	IRCCRYCCYYCLTLESEERPP
0.25	A0A0C7T5A6	tr|A0A0C7T5A6|A0A0C7T5A6_EBVG K15 OS=Epstein-Barr virus (strain GD1) OX=10376 GN=LMP-2A PE=4 SV=1	470	IRCCRYCCYYCLTLESEERPP
0.25	D7R974	tr|D7R974|D7R974_CHIKV Togavirin OS=Chikungunya virus OX=37124 GN=CHIKVgp2 PE=4 SV=1	772	IPLAALIVLCNCLRLLPCCCK
0.25	D2KBQ4	tr|D2KBQ4|D2KBQ4_CHIKV Togavirin OS=Chikungunya virus OX=37124 PE=4 SV=1	772	IPLAALIVLCNCLRLLPCCCK
0.25	C6K8E4	tr|C6K8E4|C6K8E4_CHIKV Togavirin (Fragment) OS=Chikungunya virus OX=37124 PE=4 SV=1	772	IPLAALIVLCNCLRLLPCCCK
0.25	A0A0S2XIS0	tr|A0A0S2XIS0|A0A0S2XIS0_CHIKV Spike glycoprotein E2 (Fragment) OS=Chikungunya virus OX=37124 PE=4 SV=1	447	IPLAALIVLCNCLRLLPCCCK
0.25	A0A6B9KHT1	tr|A0A6B9KHT1|A0A6B9KHT1_CHIKV Togavirin OS=Chikungunya virus OX=37124 PE=4 SV=1	772	IPLAALIVLCNCLRLLPCCCK
0.25	A0A292Q9V2	tr|A0A292Q9V2|A0A292Q9V2_CHIKV Spike glycoprotein E2 (Fragment) OS=Chikungunya virus OX=37124 GN=E2-6k-E1 PE=4 SV=1	447	IPLAALIVLCNCLRLLPCCCK
0.25	A0A077B404	tr|A0A077B404|A0A077B404_CHIKV Togavirin OS=Chikungunya virus OX=37124 PE=4 SV=1	772	IPLAALIVLCNCLRLLPCCCK
0.25	A0A2D1LY50	tr|A0A2D1LY50|A0A2D1LY50_EBVG Terminal protein LMP2A OS=Epstein-Barr virus (strain GD1) OX=10376 GN=LMP2A PE=4 SV=1	470	IRCCRYCCYYCLTLESEERPP
0.25	E2ESC6	tr|E2ESC6|E2ESC6_EBVG Latent membrane protein 2A (Fragment) OS=Epstein-Barr virus (strain GD1) OX=10376 GN=LMP2A PE=4 SV=1	351	IRCCRYCCYYCLTLESEERPP
0.25	E2ES70	tr|E2ES70|E2ES70_EBVG Latent membrane protein 2A (Fragment) OS=Epstein-Barr virus (strain GD1) OX=10376 GN=LMP2A PE=4 SV=1	351	IRCCRYCCYYCLTLESEERPP
0.25	A0A0C7T4L4	tr|A0A0C7T4L4|A0A0C7T4L4_EBVG K15 OS=Epstein-Barr virus (strain GD1) OX=10376 GN=LMP-2A PE=4 SV=1	470	IRCCRYCCYYCLTLESEERPP
0.25	A0A410J0T0	tr|A0A410J0T0|A0A410J0T0_EBVG LMP-2B OS=Epstein-Barr virus (strain GD1) OX=10376 GN=LMP-2B PE=4 SV=1	351	IRCCRYCCYYCLTLESEERPP
0.25	A0A221S5W9	tr|A0A221S5W9|A0A221S5W9_CHIKV E1 (Fragment) OS=Chikungunya virus OX=37124 PE=4 SV=1	106	IPLAALIVLCNCLRLLPCCCK
0.25	A0A1B2AIM2	tr|A0A1B2AIM2|A0A1B2AIM2_CHIKV Togavirin OS=Chikungunya virus OX=37124 PE=4 SV=1	772	IPLAALIVLCNCLRLLPCCCK
0.25	A0A221I1Y2	tr|A0A221I1Y2|A0A221I1Y2_CHIKV Capsid protein (Fragment) OS=Chikungunya virus OX=37124 PE=4 SV=1	763	IPLAALIVLCNCLRLLPCCCK
0.25	A0A6B9KBF8	tr|A0A6B9KBF8|A0A6B9KBF8_CHIKV Togavirin OS=Chikungunya virus OX=37124 PE=4 SV=1	772	IPLAALIVLCNCLRLLPCCCK
0.25	A0A0C7TGQ2	tr|A0A0C7TGQ2|A0A0C7TGQ2_EBVG LMP-2B OS=Epstein-Barr virus (strain GD1) OX=10376 GN=LMP-2B PE=4 SV=1	351	IRCCRYCCYYCLTLESEERPP
0.25	A0A0C7U0W7	tr|A0A0C7U0W7|A0A0C7U0W7_EBVG LMP-2B OS=Epstein-Barr virus (strain GD1) OX=10376 GN=LMP-2B PE=4 SV=1	351	IRCCRYCCYYCLTLESEERPP
0.25	E2ES97	tr|E2ES97|E2ES97_EBVG Latent membrane protein 2A (Fragment) OS=Epstein-Barr virus (strain GD1) OX=10376 GN=LMP2A PE=4 SV=1	351	IRCCRYCCYYCLTLESEERPP
0.25	A0A0U3SP98	tr|A0A0U3SP98|A0A0U3SP98_EBVG LMP-2B OS=Epstein-Barr virus (strain GD1) OX=10376 GN=LMP-2B PE=4 SV=1	351	IRCCRYCCYYCLTLESEERPP
0.25	A0A510C2W7	tr|A0A510C2W7|A0A510C2W7_CHIKV Togavirin OS=Chikungunya virus OX=37124 GN=SP PE=4 SV=1	788	PCCCKTLAFLSRNERRCPHCE
0.25	A0A068BH98	tr|A0A068BH98|A0A068BH98_CHIKV Togavirin OS=Chikungunya virus OX=37124 PE=4 SV=1	772	IPLAALIVLCNCLRLLPCCCK
0.25	E2ES98	tr|E2ES98|E2ES98_EBVG Latent membrane protein 2A (Fragment) OS=Epstein-Barr virus (strain GD1) OX=10376 GN=LMP2A PE=4 SV=1	351	IRCCRYCCYYCLTLESEERPP
0.25	E2ES37	tr|E2ES37|E2ES37_EBVG Latent membrane protein 2A (Fragment) OS=Epstein-Barr virus (strain GD1) OX=10376 GN=LMP2A PE=4 SV=1	351	IRCCRYCCYYCLTLESEERPP
0.25	A0A3R5WHG2	tr|A0A3R5WHG2|A0A3R5WHG2_EBVG LMP-2B OS=Epstein-Barr virus (strain GD1) OX=10376 GN=LMP-2B PE=4 SV=1	351	IRCCRYCCYYCLTLESEERPP
0.25	E2ES75	tr|E2ES75|E2ES75_EBVG Latent membrane protein 2A (Fragment) OS=Epstein-Barr virus (strain GD1) OX=10376 GN=LMP2A PE=4 SV=1	351	IRCCRYCCYYCLTLESEERPP
0.25	A0A3R6A1F7	tr|A0A3R6A1F7|A0A3R6A1F7_EBVG LMP-2B OS=Epstein-Barr virus (strain GD1) OX=10376 GN=LMP-2B PE=4 SV=1	351	IRCCRYCCYYCLTLESEERPP
0.25	A0A3R5UC79	tr|A0A3R5UC79|A0A3R5UC79_EBVG LMP-2B OS=Epstein-Barr virus (strain GD1) OX=10376 GN=LMP-2B PE=4 SV=1	351	IRCCRYCCYYCLTLESEERPP
0.25	A0A0C7TTK8	tr|A0A0C7TTK8|A0A0C7TTK8_EBVG K15 OS=Epstein-Barr virus (strain GD1) OX=10376 GN=LMP-2A PE=4 SV=1	470	IRCCRYCCYYCLTLESEERPP
0.25	A0A0C7U296	tr|A0A0C7U296|A0A0C7U296_EBVG K15 OS=Epstein-Barr virus (strain GD1) OX=10376 GN=LMP-2A PE=4 SV=1	470	IRCCRYCCYYCLTLESEERPP
0.25	A0A0C7TQI1	tr|A0A0C7TQI1|A0A0C7TQI1_EBVG K15 OS=Epstein-Barr virus (strain GD1) OX=10376 GN=LMP-2A PE=4 SV=1	470	IRCCRYCCYYCLTLESEERPP
0.25	A0A0U3TH25	tr|A0A0U3TH25|A0A0U3TH25_EBVG LMP-2B OS=Epstein-Barr virus (strain GD1) OX=10376 GN=LMP-2B PE=4 SV=1	351	IRCCRYCCYYCLTLESEERPP
0.25	A0A292QAR8	tr|A0A292QAR8|A0A292QAR8_CHIKV Spike glycoprotein E2 (Fragment) OS=Chikungunya virus OX=37124 GN=E2-6k-E1 PE=4 SV=1	447	IPLAALIVLCNCLRLLPCCCK
0.25	A0A1I7PCZ8	tr|A0A1I7PCZ8|A0A1I7PCZ8_CHIKV Togavirin OS=Chikungunya virus OX=37124 GN=gp3 PE=4 SV=1	788	PCCCKTLTFLAVLSHRCPHCE
0.25	A0A1V0EPS6	tr|A0A1V0EPS6|A0A1V0EPS6_CHIKV Togavirin OS=Chikungunya virus OX=37124 GN=gp3 PE=4 SV=1	788	PCCCKMLTFLAVLSRRCPHCE
0.25	A0A221I1G5	tr|A0A221I1G5|A0A221I1G5_CHIKV Togavirin (Fragment) OS=Chikungunya virus OX=37124 PE=4 SV=1	759	IPLAALIVLCNCLRLLPCCCK
0.25	A0A292Q9W8	tr|A0A292Q9W8|A0A292Q9W8_CHIKV Spike glycoprotein E2 (Fragment) OS=Chikungunya virus OX=37124 GN=E2-6k-E1 PE=4 SV=1	447	IPLAALIVLCNCLRLLPCCCK
0.25	A0A292QA41	tr|A0A292QA41|A0A292QA41_CHIKV Spike glycoprotein E2 (Fragment) OS=Chikungunya virus OX=37124 GN=E2-6k-E1 PE=4 SV=1	447	IPLAALIVLCNCLRLLPCCCK
0.25	A0A2R2WEQ5	tr|A0A2R2WEQ5|A0A2R2WEQ5_CHIKV Togavirin OS=Chikungunya virus OX=37124 PE=4 SV=1	772	IPLAALIVLCNCLRLLPCCCK
0.25	A0A292QBY4	tr|A0A292QBY4|A0A292QBY4_CHIKV Spike glycoprotein E2 (Fragment) OS=Chikungunya virus OX=37124 GN=E2-6k-E1 PE=4 SV=1	447	IPLAALIVLCNCLRLLPCCCK
0.25	E2ESB4	tr|E2ESB4|E2ESB4_EBVG Latent membrane protein 2A (Fragment) OS=Epstein-Barr virus (strain GD1) OX=10376 GN=LMP2A PE=4 SV=1	351	IRCCRYCCYYCLTLESEERPP
0.25	A0A410I741	tr|A0A410I741|A0A410I741_EBVG LMP-2B OS=Epstein-Barr virus (strain GD1) OX=10376 GN=LMP-2B PE=4 SV=1	351	IRCCRYCCYYCLTLESEERPP
0.25	A0A191T7F9	tr|A0A191T7F9|A0A191T7F9_EBVG Terminal protein LMP2A OS=Epstein-Barr virus (strain GD1) OX=10376 GN=LMP2A PE=4 SV=1	470	IRCCRYCCYYCLTLESEERPP
0.25	E2ESB6	tr|E2ESB6|E2ESB6_EBVG Latent membrane protein 2A (Fragment) OS=Epstein-Barr virus (strain GD1) OX=10376 GN=LMP2A PE=4 SV=1	351	IRCCRYCCYYCLTLESEERPP
0.25	A0A3R5UDI4	tr|A0A3R5UDI4|A0A3R5UDI4_EBVG LMP-2B OS=Epstein-Barr virus (strain GD1) OX=10376 GN=LMP-2B PE=4 SV=1	351	IRCCRYCCYYCLTLESEERPP
0.25	E2ES66	tr|E2ES66|E2ES66_EBVG Latent membrane protein 2A (Fragment) OS=Epstein-Barr virus (strain GD1) OX=10376 GN=LMP2A PE=4 SV=1	351	IRCCRYCCYYCLTLESEERPP
0.25	A0A221I1I5	tr|A0A221I1I5|A0A221I1I5_CHIKV Togavirin (Fragment) OS=Chikungunya virus OX=37124 PE=4 SV=1	772	IPLAALIVLCNCLRLLPCCCK
0.25	A0A5B9TE21	tr|A0A5B9TE21|A0A5B9TE21_CHIKV Togavirin OS=Chikungunya virus OX=37124 PE=4 SV=1	772	IPLAALIVLCNCLRLLPCCCK
0.25	A0A292QBI3	tr|A0A292QBI3|A0A292QBI3_CHIKV Spike glycoprotein E2 (Fragment) OS=Chikungunya virus OX=37124 GN=E2-6k-E1 PE=4 SV=1	447	IPLAALIVLCNCLRLLPCCCK
0.25	A0A6B7H914	tr|A0A6B7H914|A0A6B7H914_CHIKV Togavirin OS=Chikungunya virus OX=37124 PE=4 SV=1	772	IPLAALIVLCNCLRLLPCCCK
0.25	D2DEJ7	tr|D2DEJ7|D2DEJ7_CHIKV Togavirin OS=Chikungunya virus OX=37124 PE=4 SV=1	772	IPLAALIVLCNCLRLLPCCCK
0.25	A0A0S2XIQ6	tr|A0A0S2XIQ6|A0A0S2XIQ6_CHIKV Togavirin OS=Chikungunya virus OX=37124 PE=4 SV=1	772	IPLAALIVLCNCLRLLPCCCK
0.25	A0A451G6B2	tr|A0A451G6B2|A0A451G6B2_EBVG LMP-2B OS=Epstein-Barr virus (strain GD1) OX=10376 GN=LMP-2B PE=4 SV=1	351	IRCCRYCCYYCLTLESEERPP
0.25	E2ES59	tr|E2ES59|E2ES59_EBVG Latent membrane protein 2A (Fragment) OS=Epstein-Barr virus (strain GD1) OX=10376 GN=LMP2A PE=4 SV=1	351	IRCCRYCCYYCLTLESEERPP
0.25	E2ES57	tr|E2ES57|E2ES57_EBVG Latent membrane protein 2A (Fragment) OS=Epstein-Barr virus (strain GD1) OX=10376 GN=LMP2A PE=4 SV=1	351	IRCCRYCCYYCLTLESEERPP
0.25	E2ESB2	tr|E2ESB2|E2ESB2_EBVG Latent membrane protein 2A (Fragment) OS=Epstein-Barr virus (strain GD1) OX=10376 GN=LMP2A PE=4 SV=1	351	IRCCRYCCYYCLTLESEERPP
0.25	A0A221S5X0	tr|A0A221S5X0|A0A221S5X0_CHIKV E1 (Fragment) OS=Chikungunya virus OX=37124 PE=4 SV=1	106	IPLAALIVLCNCLRLLPCCCK
0.25	A0A1I7PD20	tr|A0A1I7PD20|A0A1I7PD20_CHIKV Togavirin OS=Chikungunya virus OX=37124 GN=gp3 PE=4 SV=1	788	PCCCKTLAFLAVMSRRCPHCE
0.25	A0A3G9E2E6	tr|A0A3G9E2E6|A0A3G9E2E6_CHIKV Togavirin OS=Chikungunya virus OX=37124 PE=4 SV=1	772	IPLAALIVLCNCLRLLPCCCK
0.25	A0A0C7TQ18	tr|A0A0C7TQ18|A0A0C7TQ18_EBVG K15 OS=Epstein-Barr virus (strain GD1) OX=10376 GN=LMP-2A PE=4 SV=1	470	IRCCRYCCYYCLTLESEERPP
0.25	K9US20	tr|K9US20|K9US20_EBVG K15 OS=Epstein-Barr virus (strain GD1) OX=10376 GN=LMP-2A PE=4 SV=1	470	IRCCRYCCYYCLTLESEERPP
0.25	E2ESA6	tr|E2ESA6|E2ESA6_EBVG Latent membrane protein 2A (Fragment) OS=Epstein-Barr virus (strain GD1) OX=10376 GN=LMP2A PE=4 SV=1	351	IRCCRYCCYYCLTLESEERPP
0.25	A0A0S2XIS8	tr|A0A0S2XIS8|A0A0S2XIS8_CHIKV Spike glycoprotein E2 (Fragment) OS=Chikungunya virus OX=37124 PE=4 SV=1	447	IPLAALIVLCNCLRLLPCCCK
0.25	A0A4D6GPB1	tr|A0A4D6GPB1|A0A4D6GPB1_CHIKV Togavirin OS=Chikungunya virus OX=37124 PE=4 SV=1	772	IPLAALIVLCNCLRLLPCCCK
0.25	A0A221I1I3	tr|A0A221I1I3|A0A221I1I3_CHIKV Capsid protein (Fragment) OS=Chikungunya virus OX=37124 PE=4 SV=1	772	IPLAALIVLCNCLRLLPCCCK
0.25	A0A1V0EPM7	tr|A0A1V0EPM7|A0A1V0EPM7_CHIKV Togavirin OS=Chikungunya virus OX=37124 GN=gp3 PE=4 SV=1	787	PCCCKMLTFLAVLSRRCPHCE
0.25	A0A0D5MBT4	tr|A0A0D5MBT4|A0A0D5MBT4_CHIKV Togavirin OS=Chikungunya virus OX=37124 PE=4 SV=1	772	IPLAALIVLCNCLRLLPCCCK
0.25	A0A411HQW2	tr|A0A411HQW2|A0A411HQW2_CHIKV Togavirin (Fragment) OS=Chikungunya virus OX=37124 GN=SP PE=4 SV=1	772	IPLAALIVLCNCLRLLPCCCK
0.25	A0A1V0EQN8	tr|A0A1V0EQN8|A0A1V0EQN8_CHIKV Togavirin OS=Chikungunya virus OX=37124 GN=gp3 PE=4 SV=1	788	PCCCKMLTFLAVLSRRCPHCE
0.25	K9UT23	tr|K9UT23|K9UT23_EBVG LMP-2B OS=Epstein-Barr virus (strain GD1) OX=10376 GN=LMP-2B PE=4 SV=1	351	IRCCRYCCYYCLTLESEERPP
0.25	E2ES60	tr|E2ES60|E2ES60_EBVG Latent membrane protein 2A (Fragment) OS=Epstein-Barr virus (strain GD1) OX=10376 GN=LMP2A PE=4 SV=1	351	IRCCRYCCYYCLTLESEERPP
[truncated: 52,118 more rows]
[truncated: 4 more columns]
