# Supplementary material for: SARS-CoV-2 Requires Cholesterol for Viral Entry and Pathological Syncytia Formation
Source: bioRxiv preprint, doi:10.1101/2020.12.14.422737, version 1 (2020-12-14)
Supplement: TableS3_Human_Spike-Like_Proteins [file 422737_file05.xlsx]

## Sheet: Description of Table S3
Table S3, Related to Figures 5, S6.Human transmembrane proteins with spike-like membrane proximal regions
(1) Acquired the complete set of human proteins (data retrieved October 2020) (UniProt Consortium, 2015), yielding 20,370 proteins.
(2) Filtered for proteins in which two or more transmembrane (TM) prediction tools predicted an overlapping TM helix or a transmembrane helix has been experimentally verified, yielding 5182 proteins
(3) Applied sliding window approach to assess local density of cysteine residues around the transmembrane helices: scanned the thirty-residue regions that lie on the N- or C- terminal sides of each transmembrane helix, using a window size of 20.
(4) For each protein, transmembrane-adjacent window with highest fraction of cysteine was taken as the protein’s cysteine fractional ‘score’.
Table S3A tab displays filtered hits (human proteins with cysteine score >= 0.25) (n=66) [0.25 arbitrary cut-off chosen, as common olfactory receptors began to appear once threshold was reduced to 0.2]
Table S3B tab displays Table S3A hits subjected to additional manual filtering to identify "Spike-Like" proteins (n=23) containing both cytosolic cysteines and membrane-proximal aromatics [color-coded based on amino acid properties]
Table S3C tab displays complete set of unfiltered human transmembrane proteins (n=5182) ranked by fractional cysteine score

## Sheet: Table S3A
FracCys	Uniprot ID	Transmembrane Protein/Gene Name	Location	20-Acid Window	Function of Protein
0.65	Q9NSI5	sp|Q9NSI5|IGSF5_HUMAN Immunoglobulin superfamily member 5 OS=Homo sapiens OX=9606 GN=IGSF5 PE=2 SV=2	287	CCCCRRRCCGCNCCCRCCFCCRRKRGFRIQF	Provides, together with MAGI1, an adhesion machinery at tight junctions, which may regulate the permeability of kidney glomerulus and small intestinal epithelial cells.
0.5	Q71H61	sp|Q71H61|ILDR2_HUMAN Immunoglobulin-like domain-containing receptor 2 OS=Homo sapiens OX=9606 GN=ILDR2 PE=2 SV=1	207	CWCQCCPHSCCCYVRCPCCPDSCCCPQALYE	Tricellular tight junctiion protein; Putatitve membrane receptor with LDR-binding activity, possibly in ER
0.5	Q86X29	sp|Q86X29|LSR_HUMAN Lipolysis-stimulated lipoprotein receptor OS=Homo sapiens OX=9606 GN=LSR PE=1 SV=4	280	CWCQCCPHTCCCYVRCPCCPDKCCCPEALYA	Tricellular tight junctiion protein; lipoprotein with role in fatty acid uptake; important to BBB formation
0.5	Q86SU0	sp|Q86SU0|ILDR1_HUMAN Immunoglobulin-like domain-containing receptor 1 OS=Homo sapiens OX=9606 GN=ILDR1 PE=1 SV=2	188	CWCQCCPQYCCCYIRCPCCPAHCCCPEEALA	Tricellular tight junctiion protein; Putatitve membrane receptor with LDR-binding activity
0.45	O60883	sp|O60883|G37L1_HUMAN G-protein coupled receptor 37-like 1 OS=Homo sapiens OX=9606 GN=GPR37L1 PE=1 SV=2	420	CRPLGQAFLDCCCCCCCEECGGASEASAANG	GPCR shown to bind the neuroprotective and glioprotective factor prosaposin (PSAP), leading to endocytosis followed by an ERK phosphorylation cascade
0.4	Q86VE9	sp|Q86VE9|SERC5_HUMAN Serine incorporator 5 OS=Homo sapiens OX=9606 GN=SERINC5 PE=2 SV=1	7	AGQLACCCGSAGCSLCCDCCPRIRQSLSTRF	Restriction factor required to restrict infectivity of lentiviruses, such as HIV-1: acts by inhibiting an early step of viral infection. Impairs the penetration of the viral particle into the cytoplasm (PubMed:26416733, PubMed:26416734). Enhances the inco
0.4	O15354	sp|O15354|GPR37_HUMAN Prosaposin receptor GPR37 OS=Homo sapiens OX=9606 GN=GPR37 PE=1 SV=2	552	LCKPFSRAFMECCCCCCEECIQKSSTVTSDD	Receptor for the neuroprotective and glioprotective factor prosaposin. Ligand binding induces endocytosis, followed by an ERK phosphorylation cascade.
0.4	Q9P2E7	sp|Q9P2E7|PCD10_HUMAN Protocadherin-10 OS=Homo sapiens OX=9606 GN=PCDH10 PE=1 SV=2	744	KKLNIYTCLASDCCLCCCCCGGGGSTCCGRQ	Potential calcium-dependent cell-adhesion protein.
0.35	O75949	sp|O75949|F155B_HUMAN Transmembrane protein FAM155B OS=Homo sapiens OX=9606 GN=FAM155B PE=2 SV=3	17	TICCCCCCWAPRPSDKPCADSERAQRWRLSL
0.35	Q86UG4	sp|Q86UG4|SO6A1_HUMAN Solute carrier organic anion transporter family member 6A1 OS=Homo sapiens OX=9606 GN=SLCO6A1 PE=2 SV=2	88	PCGLGCLVSTCCECCNNIRCFMIFYCILLIC
0.35	Q71RC9	sp|Q71RC9|SMIM5_HUMAN Small integral membrane protein 5 OS=Homo sapiens OX=9606 GN=SMIM5 PE=1 SV=2	52	ACSCCCTHCCCPERRGRKVQVQPTPP
0.35	A6NH21	sp|A6NH21|SERC4_HUMAN Serine incorporator 4 OS=Homo sapiens OX=9606 GN=SERINC4 PE=2 SV=1	29	KSPFCQVCCCGPAPCASCCHSRWPSLTASTC	Incorporates a polar amino acid serine into membranes and facilitates the synthesis of two serine-derived lipids, phosphatidylserine and sphingolipids.
0.35	Q96SA4	sp|Q96SA4|SERC2_HUMAN Serine incorporator 2 OS=Homo sapiens OX=9606 GN=SERINC2 PE=2 SV=3	10	LLSCASCLCGSAPCILCSCCPASRNSTVSRL
0.35	Q86UW1	sp|Q86UW1|OSTA_HUMAN Organic solute transporter subunit alpha OS=Homo sapiens OX=9606 GN=SLC51A PE=1 SV=1	148	LRDTPMMVHTGPCCCCCPCCPRLLLTRKKLQ	Essential component of the Ost-alpha/Ost-beta complex, a heterodimer that acts as the intestinal basolateral transporter responsible for bile acid export from enterocytes into portal blood. Efficiently transports the major species of bile acids.
0.3	P25101	sp|P25101|EDNRA_HUMAN Endothelin-1 receptor OS=Homo sapiens OX=9606 GN=EDNRA PE=1 SV=1	372	VSKKFKNCFQSCLCCCCYQSKSLMTSVPMNG	Receptor for endothelin-1. Mediates its action by association with G proteins that activate a phosphatidylinositol-calcium second messenger system. The rank order of binding affinities for ET-A is: ET1 > ET2 >> ET3.
0.3	Q8N271	sp|Q8N271|PROM2_HUMAN Prominin-2 OS=Homo sapiens OX=9606 GN=PROM2 PE=1 SV=1	124	GLCFCCCRCHRRCGGRVKTEHKALACERAAL	Binds cholesterol
0.3	P48230	sp|P48230|T4S4_HUMAN Transmembrane 4 L6 family member 4 OS=Homo sapiens OX=9606 GN=TM4SF4 PE=1 SV=1	179	VNGLLGTLCGDCQCCGCCGGDGPV	Regulates the adhesive and proliferative status of intestinal epithelial cells. Can mediate density-dependent cell proliferation.
0.3	P30408	sp|P30408|T4S1_HUMAN Transmembrane 4 L6 family member 1 OS=Homo sapiens OX=9606 GN=TM4SF1 PE=1 SV=1	70	LEQDDCCGCCGHENCGKRCAMLSSVLAALIG	Highly expressed in lung, breast, colon and ovarian carcinomas. It is also present on some normal cells, endothelial cells in particular.
0.3	Q6UXU6	sp|Q6UXU6|TMM92_HUMAN Transmembrane protein 92 OS=Homo sapiens OX=9606 GN=TMEM92 PE=1 SV=1	28	CGLILACPKGFKCCGDSCCQENELFPGPVRI
0.3	Q6YI46	sp|Q6YI46|TMM64_HUMAN Transmembrane protein 64 OS=Homo sapiens OX=9606 GN=TMEM64 PE=2 SV=2	108	NWRCCCLGSTCWCRSLVLVCVLAALCFASLA	Positively regulates TNFSF11-induced osteoclast differentiation. Acts as a regulator of TNFSF11-mediated Ca2+ signaling pathways via its interaction with SERCA2 which is critical for the TNFSF11-induced CREB1 activation and mitochondrial ROS generation ne
0.3	Q6ZT12	sp|Q6ZT12|UBR3_HUMAN E3 ubiquitin-protein ligase UBR3 OS=Homo sapiens OX=9606 GN=UBR3 PE=2 SV=2	1782	CGTFVCLKGLCCKQQSYCECVLHSQNCGAGT	E3 ubiquitin-protein ligase which is a component of the N-end rule pathway (By similarity). Does not bind to proteins bearing specific N-terminal residues that are destabilizing according to the N-end rule, leading to their ubiquitination and subsequent d
0.3	Q8N114	sp|Q8N114|SHSA5_HUMAN Protein shisa-5 OS=Homo sapiens OX=9606 GN=SHISA5 PE=1 SV=1	126	ICFTCSCCCLYKTCRRPRPVVTTTTSTTVVH	Can induce apoptosis in a caspase-dependent manner and plays a role in p53/TP53-dependent apoptosis.
0.3	Q5UAW9	sp|Q5UAW9|GP157_HUMAN G-protein coupled receptor 157 OS=Homo sapiens OX=9606 GN=GPR157 PE=2 SV=2	279	FVLCTRAVRTRLFSLCCCCCSSQPPTKSPAG	Orphan receptor that promotes neuronal differentiation of radial glial progenitors (RGPs). The activity of this receptor is mediated by a G(q)-protein that activates a phosphatidylinositol-calcium second messenger.
0.3	Q53GD3	sp|Q53GD3|CTL4_HUMAN Choline transporter-like protein 4 OS=Homo sapiens OX=9606 GN=SLC44A4 PE=1 SV=2	528	GVQNPVARCIMCCFKCCLWCLEKFIKFLNRN	Choline transporter that plays a role in the choline-acetylcholine system and is required to the efferent innervation of hair cells in the olivocochlear bundle for the maintenance of physiological function of outer hair cells and the protection of hair ce
0.3	Q9NRX5	sp|Q9NRX5|SERC1_HUMAN Serine incorporator 1 OS=Homo sapiens OX=9606 GN=SERINC1 PE=1 SV=1	10	MASWIPCLCGSAPCLLCRCCPSGNNSTVTRL	Enhances the incorporation of serine into phosphatidylserine and sphingolipids.
0.3	Q99572	sp|Q99572|P2RX7_HUMAN P2X purinoceptor 7 OS=Homo sapiens OX=9606 GN=P2RX7 PE=1 SV=4	358	YSSNCCRSHIYPWCKCCQPCVVNEYYYRKKC	Receptor for ATP that acts as a ligand-gated ion channel. Responsible for ATP-dependent lysis of macrophages through the formation of membrane pores permeable to large molecules.
0.3	Q9HB15	sp|Q9HB15|KCNKC_HUMAN Potassium channel subfamily K member 12 OS=Homo sapiens OX=9606 GN=KCNK12 PE=2 SV=1	9	PPRRSRRRLPRPSCCCCCCRRSHLNEDTGRF	Probable potassium channel subunit. No channel activity observed in heterologous systems. M
0.3	P16144	sp|P16144|ITB4_HUMAN Integrin beta-4 OS=Homo sapiens OX=9606 GN=ITGB4 PE=1 SV=5	733	WKYCACCKACLALLPCCNRGHMVGFKEDHYM	Integrin alpha-6/beta-4 is a receptor for laminin. Plays a critical structural role in the hemidesmosome of epithelial cells. Is required for the regulation of keratinocyte polarity and motility. ITGA6:ITGB4 binds to NRG1 (via EGF domain) and this binding
0.25	Q8IWA5	sp|Q8IWA5|CTL2_HUMAN Choline transporter-like protein 2 OS=Homo sapiens OX=9606 GN=SLC44A2 PE=1 SV=3	531	AAENKFAKCLMTCLKCCFWCLEKFIKFLNRN	Isoform 1, but not isoform 3, exhibits some choline transporter activity.
0.25	Q969N4	sp|Q969N4|TAAR8_HUMAN Trace amine-associated receptor 8 OS=Homo sapiens OX=9606 GN=TAAR8 PE=2 SV=1	96	CWYFGAKFCTLHSCCDVAFCYSSVLHLCFIC	Orphan receptor. Could be a receptor for trace amines. Trace amines are biogenic amines present in very low levels in mammalian tissue
0.25	P54756	sp|P54756|EPHA5_HUMAN Ephrin type-A receptor 5 OS=Homo sapiens OX=9606 GN=EPHA5 PE=1 SV=3	594	LSGSCCECGCGRASSLCAVAHPSLIWRCGYS	Receptor tyrosine kinase which binds promiscuously GPI-anchored ephrin-A family ligands residing on adjacent cells, leading to contact-dependent bidirectional signaling into neighboring cells. The signaling pathway downstream of the receptor is referred t
0.25	P22413	sp|P22413|ENPP1_HUMAN Ectonucleotide pyrophosphatase/phosphodiesterase family member 1 OS=Homo sapiens OX=9606 GN=ENPP1 PE=1 SV=2	107	SCKGRCFERTFGNCRCDAACVELGNCCLDYQ	Nucleotide pyrophosphatase that generates diphosphate (PPi) and functions in bone mineralization and soft tissue calcification by regulating pyrophosphate levels (By similarity). PPi inhibits bone mineralization and soft tissue calcification by binding to
0.25	P04626	sp|P04626|ERBB2_HUMAN Receptor tyrosine-protein kinase erbB-2 OS=Homo sapiens OX=9606 GN=ERBB2 PE=1 SV=1	623	CQPCPINCTHSCVDLDDKGCPAEQRASPLTS	Protein tyrosine kinase that is part of several cell surface receptor complexes, but that apparently needs a coreceptor for ligand binding. Essential component of a neuregulin-receptor complex, although neuregulins do not interact with it alone. GP30 is a
0.25	O95500	sp|O95500|CLD14_HUMAN Claudin-14 OS=Homo sapiens OX=9606 GN=CLDN14 PE=1 SV=1	88	CLLSGIACACAVIGMKCTRCAKGTPAKTTFA	Plays a major role in tight junction-specific obliteration of the intercellular space, through calcium-independent cell-adhesion activity.
0.25	Q96N68	sp|Q96N68|CR015_HUMAN Putative uncharacterized protein C18orf15 OS=Homo sapiens OX=9606 GN=C18orf15 PE=5 SV=1	113	RGPCCPVHPQSLTVVCMCACMCVCVHVCACV	Product of a dubious CDS prediction.
0.25	Q96AW1	sp|Q96AW1|VOPP1_HUMAN Vesicular prosurvival protein 1 OS=Homo sapiens OX=9606 GN=VOPP1 PE=2 SV=1	32	LYPTYYICRSYEDCCGSRCCVRALSIQRLWY	Increases the transcriptional activity of NFKB1 by facilitating its nuclear translocation, DNA-binding and associated apoptotic response, when overexpressed.
0.25	Q96RI8	sp|Q96RI8|TAAR6_HUMAN Trace amine-associated receptor 6 OS=Homo sapiens OX=9606 GN=TAAR6 PE=2 SV=1	97	CWYFGRSFCTFHTCCDVAFCYSSLFHLCFIS	Orphan receptor. Could be a receptor for trace amines.
0.25	Q14162	sp|Q14162|SREC_HUMAN Scavenger receptor class F member 1 OS=Homo sapiens OX=9606 GN=SCARF1 PE=1 SV=3	393	NCSVPCECPEGLCHPVSGSCQPGSGSRDTAL	Mediates the binding and degradation of acetylated low density lipoprotein (Ac-LDL). Mediates heterophilic interactions, suggesting a function as adhesion protein.
0.25	Q96J86	sp|Q96J86|CYYR1_HUMAN Cysteine and tyrosine-rich protein 1 OS=Homo sapiens OX=9606 GN=CYYR1 PE=2 SV=1	32	GKDCKSYCCDGTTPYCCSYYAYIGNILSGTA
0.25	Q96GP6	sp|Q96GP6|SREC2_HUMAN Scavenger receptor class F member 2 OS=Homo sapiens OX=9606 GN=SCARF2 PE=1 SV=5	414	DCAQACSCHEDTCDPVTGACHLETNQRKGVM	Probable adhesion protein, which mediates homophilic and heterophilic interactions. In contrast to SCARF1, it poorly mediates the binding and degradation of acetylated low density lipoprotein (Ac-LDL) (By similarity).
0.25	O14894	sp|O14894|T4S5_HUMAN Transmembrane 4 L6 family member 5 OS=Homo sapiens OX=9606 GN=TM4SF5 PE=1 SV=2	67	AVRAGGKGCCGAGCCGNRCRMLRSVFSSAFG	Acts as a lysosomal membrane arginine sensor (PubMed:30956113). Forms a complex with MTOR and SLC38A9 on lysosomal membranes in an arginine-regulated manner, leading to arginine efflux which enables the activation of mTORC1 which subsequently leads to RPS
0.25	Q8TE23	sp|Q8TE23|TS1R2_HUMAN Taste receptor type 1 member 2 OS=Homo sapiens OX=9606 GN=TAS1R2 PE=3 SV=2	628	STCLCRQALFPLCFTICISCIAVRSFQIVCA	Putative taste receptor. TAS1R2/TAS1R3 recognizes diverse natural and synthetic sweeteners.
0.25	Q66K66	sp|Q66K66|TM198_HUMAN Transmembrane protein 198 OS=Homo sapiens OX=9606 GN=TMEM198 PE=1 SV=1	40	LVCIMCCLFGVVYCFFGYRCFKAVLFLTGLL	Promotes LRP6 phosphorylation by casein kinases and thereby plays a role in Wnt signaling. May be a membrane scaffold protein involved in the self-aggregation of LRP6 to further enhance its activity.
0.25	Q9BSA4	sp|Q9BSA4|TTYH2_HUMAN Protein tweety homolog 2 OS=Homo sapiens OX=9606 GN=TTYH2 PE=1 SV=3	69	CACHCRRDDAVQTKQHHSCCITWTAVVAGLI	Probable large-conductance Ca2+-activated chloride channel. May play a role in Ca2+ signal transduction. May be involved in cell proliferation and cell aggregation
0.25	Q9NX94	sp|Q9NX94|WBP1L_HUMAN WW domain binding protein 1-like OS=Homo sapiens OX=9606 GN=WBP1L PE=1 SV=2	17	TNNQSYICDTGHCCGQSQCCNYYYELWWFWL
0.25	Q93038	sp|Q93038|TNR25_HUMAN Tumor necrosis factor receptor superfamily member 25 OS=Homo sapiens OX=9606 GN=TNFRSF25 PE=1 SV=2	176	CVSCPTSTLGSCPERCAAVCGWRQMFWVQVL	Receptor for TNFSF12/APO3L/TWEAK. Interacts directly with the adapter TRADD. Mediates activation of NF-kappa-B and induces apoptosis. May play a role in regulating lymphocyte homeostasis.
0.25	Q9H6R6	sp|Q9H6R6|ZDHC6_HUMAN Palmitoyltransferase ZDHHC6 OS=Homo sapiens OX=9606 GN=ZDHHC6 PE=1 SV=1	117	KCNRCVMKMDHHCPWINNCCGYQNHASFTLF	Endoplasmic reticulum palmitoyl acyltransferase that mediates palmitoylation of proteins such as AMFR, CALX, ITPR1 and TFRC (PubMed:22314232, PubMed:22728137, PubMed:25368151, PubMed:28826475). Palmitoylates calnexin (CALX), which is required for its asso
0.25	Q8IUH4	sp|Q8IUH4|ZDH13_HUMAN Palmitoyltransferase ZDHHC13 OS=Homo sapiens OX=9606 GN=ZDHHC13 PE=1 SV=3	441	HCHVCNCCVARYDQHCLWTGRCIGFGNHHYY	Palmitoyltransferase that could catalyze the addition of palmitate onto various protein substrates (By similarity). Palmitoyltransferase for HTT and GAD2. May play a role in Mg2+ transport.
0.25	O00220	sp|O00220|TR10A_HUMAN Tumor necrosis factor receptor superfamily member 10A OS=Homo sapiens OX=9606 GN=TNFRSF10A PE=1 SV=3	262	CCIGSGCGGDPKCMDRVCFWRLGLLRGPGAE	Receptor for the cytotoxic ligand TNFSF10/TRAIL. The adapter molecule FADD recruits caspase-8 to the activated receptor. The resulting death-inducing signaling complex (DISC) performs caspase-8 proteolytic activation which initiates the subsequent cascade
0.25	Q9C0H2	sp|Q9C0H2|TTYH3_HUMAN Protein tweety homolog 3 OS=Homo sapiens OX=9606 GN=TTYH3 PE=1 SV=3	66	FWLCCRRRKSEEHLDADCCCTAWCVIIATLV	Probable large-conductance Ca2+-activated chloride channel. May play a role in Ca2+ signal transduction.
0.25	Q5JW98	sp|Q5JW98|CAHM4_HUMAN Calcium homeostasis modulator protein 4 OS=Homo sapiens OX=9606 GN=CALHM4 PE=1 SV=1	82	CCSCAPPYRRISPLECKLACLRFFSITGRAV	Pore-forming subunit of a voltage-gated ion channel.
0.25	Q86WK7	sp|Q86WK7|AMGO3_HUMAN Amphoterin-induced protein 3 OS=Homo sapiens OX=9606 GN=AMIGO3 PE=2 SV=1	404	APPCRCCRRACRCRRWPQTPSPLQELSAQSS	May mediate heterophilic cell-cell interaction. May contribute to signal transduction through its intracellular domain
0.25	P24530	sp|P24530|EDNRB_HUMAN Endothelin receptor type B OS=Homo sapiens OX=9606 GN=EDNRB PE=1 SV=1	389	VSKRFKNCFKSCLCCWCQSFEEKQSLEEKQS	Non-specific receptor for endothelin 1, 2, and 3. Mediates its action by association with G proteins that activate a phosphatidylinositol-calcium second messenger syste
0.25	Q6TCH7	sp|Q6TCH7|PAQR3_HUMAN Progestin and adipoQ receptor family member 3 OS=Homo sapiens OX=9606 GN=PAQR3 PE=1 SV=2	102	REDFVICSICLFCFQVCMLCSVGYHLFSCHR	Functions as a spatial regulator of RAF1 kinase by sequestrating it to the Golgi.
0.25	Q9Y5F7	sp|Q9Y5F7|PCDGL_HUMAN Protocadherin gamma-C4 OS=Homo sapiens OX=9606 GN=PCDHGC4 PE=2 SV=1	714	KCLRGAACGVTCFPAGTCACLTRSRRREGLP	Potential calcium-dependent cell-adhesion protein. May be involved in the establishment and maintenance of specific neuronal connections in the brain.
0.25	Q8NCS7	sp|Q8NCS7|CTL5_HUMAN Choline transporter-like protein 5 OS=Homo sapiens OX=9606 GN=SLC44A5 PE=2 SV=5	542	RTQNTLSKFLQCCLRCCFWCLENAIKFLNRN
0.25	O43490	sp|O43490|PROM1_HUMAN Prominin-1 OS=Homo sapiens OX=9606 GN=PROM1 PE=1 SV=1	129	FFCMCRCCNKCGGEMHQRQKENGPFLRKCFA	May play a role in cell differentiation, proliferation and apoptosis. Binds cholesterol in cholesterol-containing plasma membrane microdomains and may play a role in the organization of the apical plasma membrane in epithelial cells.
0.25	Q7Z419	sp|Q7Z419|R144B_HUMAN E3 ubiquitin-protein ligase RNF144B OS=Homo sapiens OX=9606 GN=RNF144B PE=1 SV=1	278	LASPCIICCVCKSCRGKKKKHDPSTT	E3 ubiquitin-protein ligase which accepts ubiquitin from E2 ubiquitin-conjugating enzymes UBE2L3 and UBE2L6 in the form of a thioester and then directly transfers the ubiquitin to targeted substrates such as LCMT2, thereby promoting their degradation.
0.25	Q9H158	sp|Q9H158|PCDC1_HUMAN Protocadherin alpha-C1 OS=Homo sapiens OX=9606 GN=PCDHAC1 PE=2 SV=2	704	CTKLHQSPGCCAQSCCRSTEDLRYGSKMVSN	Potential calcium-dependent cell-adhesion protein. May be involved in the establishment and maintenance of specific neuronal connections in the brain.
0.25	Q9H3V2	sp|Q9H3V2|MS4A5_HUMAN Membrane-spanning 4-domains subfamily A member 5 OS=Homo sapiens OX=9606 GN=MS4A5 PE=2 SV=1	181	SLPFSILGCHSEDCDCEQCC	May be involved in signal transduction as a component of a multimeric receptor complex.
0.25	P53801	sp|P53801|PTTG_HUMAN Pituitary tumor-transforming gene 1 protein-interacting protein OS=Homo sapiens OX=9606 GN=PTTG1IP PE=1 SV=1	117	CCCCCRRKRSRKPDRSEEKAMREREERRIRQ	May facilitate PTTG1 nuclear translocation.
0.25	Q14943	sp|Q14943|KI3S1_HUMAN Killer cell immunoglobulin-like receptor 3DS1 OS=Homo sapiens OX=9606 GN=KIR3DS1 PE=1 SV=2	360	LHRWCSNKKKCCCNGPRACREQK	Receptor on natural killer (NK) cells for MHC class I molecules. Upon interaction with peptide-free HLA-F open conformer, triggers NK cell degranulation and anti-viral cytokine production.
0.25	Q5T848	sp|Q5T848|GP158_HUMAN Probable G-protein coupled receptor 158 OS=Homo sapiens OX=9606 GN=GPR158 PE=1 SV=1	389	AYVCLPCREGCPFCADDSPCFVQEDKYLRLA	Orphan receptor.
0.25	Q6PRD1	sp|Q6PRD1|GP179_HUMAN Probable G-protein coupled receptor 179 OS=Homo sapiens OX=9606 GN=GPR179 PE=1 SV=2	353	LLQCLPCPEGCTSCMDATPCLVEEAAVLRAA	Orphan receptor, involved in vision. Required for signal transduction through retinal depolarizing bipolar cells.
0.25	P00533	sp|P00533|EGFR_HUMAN Epidermal growth factor receptor OS=Homo sapiens OX=9606 GN=EGFR PE=1 SV=2	617	CHLCHPNCTYGCTGPGLEGCPTNGPKIPSIA	Receptor tyrosine kinase binding ligands of the EGF family and activating several signaling cascades to convert extracellular cues into appropriate cellular responses
0.25	P51795	sp|P51795|CLCN5_HUMAN H(+)/Cl(-) exchange transporter 5 OS=Homo sapiens OX=9606 GN=CLCN5 PE=1 SV=2	279	GKEGPLVHVACCCGNILCHCFNKYRKNEAKR	Proton-coupled chloride transporter. Functions as antiport system and exchanges chloride ions against protons. Important for normal acidification of the endosome lumen. May play an important role in renal tubular function.

## Sheet: Table S3B
FracCys	Uniprot ID	Transmembrane Protein/Gene Name	Location	20-Acid Window	Ectodomain (Membrane Proximal)	Transmembrane Helix	Cysteine-Rich Cytoplasmic Domain	Function of Protein
0.65	Q9NSI5	sp|Q9NSI5|IGSF5_HUMAN Immunoglobulin superfamily member 5 OS=Homo sapiens OX=9606 GN=IGSF5 PE=2 SV=2	287	CCCCRRRCCGCNCCCRCCFCCRRKRGFRIQF	IPGVLSSLPS LGFSLPTWGK	VGLGLAGTML LTPTCTLTI	RCCCCRRRCC GCNCCCRCCF CCR	Provides, together with MAGI1, an adhesion machinery at tight junctions, which may regulate the permeability of kidney glomerulus and small intestinal epithelial cells.
0.5	Q71H61	sp|Q71H61|ILDR2_HUMAN Immunoglobulin-like domain-containing receptor 2 OS=Homo sapiens OX=9606 GN=ILDR2 PE=2 SV=1	207	CWCQCCPHSCCCYVRCPCCPDSCCCPQALYE	RTGLLADLLP SFAVEIMPEW	VFVGLVLLGV FLFFVLVGI	CWCQCCPHSC CCYVRCPCCP DSCCCP	Tricellular tight junctiion protein; Putatitve membrane receptor with LDR-binding activity, possibly in ER
0.5	Q86X29	sp|Q86X29|LSR_HUMAN Lipolysis-stimulated lipoprotein receptor OS=Homo sapiens OX=9606 GN=LSR PE=1 SV=4	280	CWCQCCPHTCCCYVRCPCCPDKCCCPEALYA	RTSEAPELLP GFRAGPLEDW	LFVVVVCLAS LLFFLLLGI	CWCQCCPHTC CCYVRCPCCP DKCCCP	Tricellular tight junctiion protein; lipoprotein with role in fatty acid uptake; important to BBB formation
0.5	Q86SU0	sp|Q86SU0|ILDR1_HUMAN Immunoglobulin-like domain-containing receptor 1 OS=Homo sapiens OX=9606 GN=ILDR1 PE=1 SV=2	188	CWCQCCPQYCCCYIRCPCCPAHCCCPEEALA	APGDTSGDPD KEVKLIVLHW	LTVIFIILGA LLLLLLIGV	CWCQCCPQYC CCYIRCPCCP AHCCCP	Tricellular tight junctiion protein; Putatitve membrane receptor with LDR-binding activity
0.3	P25101	sp|P25101|EDNRA_HUMAN Endothelin-1 receptor OS=Homo sapiens OX=9606 GN=EDNRA PE=1 SV=1	372	VSKKFKNCFQSCLCCCCYQSKSLMTSVPMNG	ILKKTVYNEM DKNRCELLSF	LLMDYIGINL ATMNSCINPI ALYFV	SKKFKNCFQS CLCCCCYQ	Receptor for endothelin-1. Mediates its action by association with G proteins that activate a phosphatidylinositol-calcium second messenger system.
0.3	P48230	sp|P48230|T4S4_HUMAN Transmembrane 4 L6 family member 4 OS=Homo sapiens OX=9606 GN=TM4SF4 PE=1 SV=1	179	VNGLLGTLCGDCQCCGCCGGDGPV	DEALWNKCRE PLNVVPWNLT	LFSILLVVGG IQMVLCAIQV V	NGLLGTLCGD CQCCGCCGGD	Regulates the adhesive and proliferative status of intestinal epithelial cells. Can mediate density-dependent cell proliferation.
0.3	Q8N114	sp|Q8N114|SHSA5_HUMAN Protein shisa-5 OS=Homo sapiens OX=9606 GN=SHISA5 PE=1 SV=1	126	ICFTCSCCCLYKTCRRPRPVVTTTTSTTVVH	EQLGSALRFR PGYNDPMSGF	GATLAVGLTI FVLSVVTIII	CFTCSCCCLY KTCRRPRPVV	Can induce apoptosis in a caspase-dependent manner and plays a role in p53/TP53-dependent apoptosis.
0.3	P16144	sp|P16144|ITB4_HUMAN Integrin beta-4 OS=Homo sapiens OX=9606 GN=ITGB4 PE=1 SV=5	733	WKYCACCKACLALLPCCNRGHMVGFKEDHYM	PNSTVLVHKK KDCPPGSFWW	LIPLLLLLLP LLALLLLL	CWKYCACCKA CLALLPCCNR	Plays a critical structural role in the hemidesmosome (focal adhesion-like assembly) of epithelial cells; is required for the regulation of keratinocyte polarity and motility.
0.25	O14894	sp|O14894|T4S5_HUMAN Transmembrane 4 L6 family member 5 OS=Homo sapiens OX=9606 GN=TM4SF5 PE=1 SV=2	67	AVRAGGKGCCGAGCCGNRCRMLRSVFSSAFG	PNGETSWTNT NHLSLQVW	LMGGFIGGGL MVLCPGIAA	VRAGGKGCCG AGCCGNRCRM	Acts as a lysosomal membrane arginine sensor, forming a complex with MTOR and SLC38A9 on lysosomal membranes in an arginine-regulated manner.
0.25	O00220	sp|O00220|TR10A_HUMAN Tumor necrosis factor receptor superfamily member 10A OS=Homo sapiens OX=9606 GN=TNFRSF10A PE=1 SV=3	262	CCIGSGCGGDPKCMDRVCFWRLGLLRGPGAE	PWSDIECVHK ESGNGHNIW	VILVVTLVVP LLLVAVLIV	CCCIGSGCGG DPKCMDRVCF	Receptor for the cytotoxic ligand TNFSF10/TRAIL; in conjunction with FADD and caspase-8, forms the death-inducing signaling complex (DISC) that mediates apoptosis
0.25	Q86WK7	sp|Q86WK7|AMGO3_HUMAN Amphoterin-induced protein 3 OS=Homo sapiens OX=9606 GN=AMIGO3 PE=2 SV=1	404	APPCRCCRRACRCRRWPQTPSPLQELSAQSS	THEYNVSVHF PRPEPEAFNT	GFTTLLGCAV GLVLVLLYLF A	PPCRCCRRAC RCRRWP	May mediate heterophilic cell-cell interaction. May contribute to signal transduction through its intracellular domain
0.25	P24530	sp|P24530|EDNRB_HUMAN Endothelin receptor type B OS=Homo sapiens OX=9606 GN=EDNRB PE=1 SV=1	389	VSKRFKNCFKSCLCCWCQSFEEKQSLEEKQS	NQNDPNRCEL LSF	LLVLDYIGIN MASLNSCINP IALYLV	SKRFKNCFKS CLCCWCQSFE	Non-specific receptor for endothelins; mediates its action by association with G proteins that activate a phosphatidylinositol-calcium second messenger system
0.25	Q9Y5F7	sp|Q9Y5F7|PCDGL_HUMAN Protocadherin gamma-C4 OS=Homo sapiens OX=9606 GN=PCDHGC4 PE=2 SV=1	714	KCLRGAACGVTCFPAGTCACLTRSRRREGLP	VPDLRESSAP REGESRLTLY	LAVSLVAICF VSFGSFVALL S	KCLRGAACGV TCFPAGTCAC	Potential calcium-dependent cell-adhesion protein. May be involved in the establishment and maintenance of specific neuronal connections in the brain.
0.25	Q9H158	sp|Q9H158|PCDC1_HUMAN Protocadherin alpha-C1 OS=Homo sapiens OX=9606 GN=PCDHAC1 PE=2 SV=2	704	CTKLHQSPGCCAQSCCRSTEDLRYGSKMVSN	LPDFEDVWEP GGQLSAQNLY	LVIALACISF LFLGCLLFFV	CTKLHQSPGC CAQSCCRSTE	Potential calcium-dependent cell-adhesion protein. May be involved in the establishment and maintenance of specific neuronal connections in the brain.
0.25	P53801	sp|P53801|PTTG_HUMAN Pituitary tumor-transforming gene 1 protein-interacting protein OS=Homo sapiens OX=9606 GN=PTTG1IP PE=1 SV=1	117	CCCCCRRKRSRKPDRSEEKAMREREERRIRQ	PASLCKLSSA RWGVCWVNFE	ALIITMSVVG GTLLLGIAI	CCCCCCRRKR SRKPD	May facilitate PTTG1 nuclear translocation.
0.5	P0DTC2	SARS-CoV-2 Spike Protein (for comparison purposes)	1235	CCMTSCCSCLKGCCSCGSCCKFDEDDSEPV	NESLIDLQEL GKYEQYIKWP	WYIWLGFIAG LIAIVMVTIM L	CCMTSCCSCL KGCCSCGSCC	Spike Protein

## Sheet: Table S3C
FracCys	Uniprot ID	Transmembrane Protein/Gene Name	Location	20-Acid Window
0.65	Q9NSI5	sp|Q9NSI5|IGSF5_HUMAN Immunoglobulin superfamily member 5 OS=Homo sapiens OX=9606 GN=IGSF5 PE=2 SV=2	287	CCCCRRRCCGCNCCCRCCFCCRRKRGFRIQF
0.5	Q71H61	sp|Q71H61|ILDR2_HUMAN Immunoglobulin-like domain-containing receptor 2 OS=Homo sapiens OX=9606 GN=ILDR2 PE=2 SV=1	207	CWCQCCPHSCCCYVRCPCCPDSCCCPQALYE
0.5	Q86X29	sp|Q86X29|LSR_HUMAN Lipolysis-stimulated lipoprotein receptor OS=Homo sapiens OX=9606 GN=LSR PE=1 SV=4	280	CWCQCCPHTCCCYVRCPCCPDKCCCPEALYA
0.5	Q86SU0	sp|Q86SU0|ILDR1_HUMAN Immunoglobulin-like domain-containing receptor 1 OS=Homo sapiens OX=9606 GN=ILDR1 PE=1 SV=2	188	CWCQCCPQYCCCYIRCPCCPAHCCCPEEALA
0.45	O60883	sp|O60883|G37L1_HUMAN G-protein coupled receptor 37-like 1 OS=Homo sapiens OX=9606 GN=GPR37L1 PE=1 SV=2	420	CRPLGQAFLDCCCCCCCEECGGASEASAANG
0.4	Q86VE9	sp|Q86VE9|SERC5_HUMAN Serine incorporator 5 OS=Homo sapiens OX=9606 GN=SERINC5 PE=2 SV=1	7	AGQLACCCGSAGCSLCCDCCPRIRQSLSTRF
0.4	O15354	sp|O15354|GPR37_HUMAN Prosaposin receptor GPR37 OS=Homo sapiens OX=9606 GN=GPR37 PE=1 SV=2	552	LCKPFSRAFMECCCCCCEECIQKSSTVTSDD
0.4	Q9P2E7	sp|Q9P2E7|PCD10_HUMAN Protocadherin-10 OS=Homo sapiens OX=9606 GN=PCDH10 PE=1 SV=2	744	KKLNIYTCLASDCCLCCCCCGGGGSTCCGRQ
0.35	O75949	sp|O75949|F155B_HUMAN Transmembrane protein FAM155B OS=Homo sapiens OX=9606 GN=FAM155B PE=2 SV=3	17	TICCCCCCWAPRPSDKPCADSERAQRWRLSL
0.35	Q86UG4	sp|Q86UG4|SO6A1_HUMAN Solute carrier organic anion transporter family member 6A1 OS=Homo sapiens OX=9606 GN=SLCO6A1 PE=2 SV=2	88	PCGLGCLVSTCCECCNNIRCFMIFYCILLIC
0.35	Q71RC9	sp|Q71RC9|SMIM5_HUMAN Small integral membrane protein 5 OS=Homo sapiens OX=9606 GN=SMIM5 PE=1 SV=2	52	ACSCCCTHCCCPERRGRKVQVQPTPP
0.35	A6NH21	sp|A6NH21|SERC4_HUMAN Serine incorporator 4 OS=Homo sapiens OX=9606 GN=SERINC4 PE=2 SV=1	29	KSPFCQVCCCGPAPCASCCHSRWPSLTASTC
0.35	Q96SA4	sp|Q96SA4|SERC2_HUMAN Serine incorporator 2 OS=Homo sapiens OX=9606 GN=SERINC2 PE=2 SV=3	10	LLSCASCLCGSAPCILCSCCPASRNSTVSRL
0.35	Q86UW1	sp|Q86UW1|OSTA_HUMAN Organic solute transporter subunit alpha OS=Homo sapiens OX=9606 GN=SLC51A PE=1 SV=1	148	LRDTPMMVHTGPCCCCCPCCPRLLLTRKKLQ
0.3	P25101	sp|P25101|EDNRA_HUMAN Endothelin-1 receptor OS=Homo sapiens OX=9606 GN=EDNRA PE=1 SV=1	372	VSKKFKNCFQSCLCCCCYQSKSLMTSVPMNG
0.3	Q8N271	sp|Q8N271|PROM2_HUMAN Prominin-2 OS=Homo sapiens OX=9606 GN=PROM2 PE=1 SV=1	124	GLCFCCCRCHRRCGGRVKTEHKALACERAAL
0.3	P48230	sp|P48230|T4S4_HUMAN Transmembrane 4 L6 family member 4 OS=Homo sapiens OX=9606 GN=TM4SF4 PE=1 SV=1	179	VNGLLGTLCGDCQCCGCCGGDGPV
0.3	P30408	sp|P30408|T4S1_HUMAN Transmembrane 4 L6 family member 1 OS=Homo sapiens OX=9606 GN=TM4SF1 PE=1 SV=1	70	LEQDDCCGCCGHENCGKRCAMLSSVLAALIG
0.3	Q6UXU6	sp|Q6UXU6|TMM92_HUMAN Transmembrane protein 92 OS=Homo sapiens OX=9606 GN=TMEM92 PE=1 SV=1	28	CGLILACPKGFKCCGDSCCQENELFPGPVRI
0.3	Q6YI46	sp|Q6YI46|TMM64_HUMAN Transmembrane protein 64 OS=Homo sapiens OX=9606 GN=TMEM64 PE=2 SV=2	108	NWRCCCLGSTCWCRSLVLVCVLAALCFASLA
0.3	Q6ZT12	sp|Q6ZT12|UBR3_HUMAN E3 ubiquitin-protein ligase UBR3 OS=Homo sapiens OX=9606 GN=UBR3 PE=2 SV=2	1782	CGTFVCLKGLCCKQQSYCECVLHSQNCGAGT
0.3	Q8N114	sp|Q8N114|SHSA5_HUMAN Protein shisa-5 OS=Homo sapiens OX=9606 GN=SHISA5 PE=1 SV=1	126	ICFTCSCCCLYKTCRRPRPVVTTTTSTTVVH
0.3	Q5UAW9	sp|Q5UAW9|GP157_HUMAN G-protein coupled receptor 157 OS=Homo sapiens OX=9606 GN=GPR157 PE=2 SV=2	279	FVLCTRAVRTRLFSLCCCCCSSQPPTKSPAG
0.3	Q53GD3	sp|Q53GD3|CTL4_HUMAN Choline transporter-like protein 4 OS=Homo sapiens OX=9606 GN=SLC44A4 PE=1 SV=2	528	GVQNPVARCIMCCFKCCLWCLEKFIKFLNRN
0.3	Q9NRX5	sp|Q9NRX5|SERC1_HUMAN Serine incorporator 1 OS=Homo sapiens OX=9606 GN=SERINC1 PE=1 SV=1	10	MASWIPCLCGSAPCLLCRCCPSGNNSTVTRL
0.3	Q99572	sp|Q99572|P2RX7_HUMAN P2X purinoceptor 7 OS=Homo sapiens OX=9606 GN=P2RX7 PE=1 SV=4	358	YSSNCCRSHIYPWCKCCQPCVVNEYYYRKKC
0.3	Q9HB15	sp|Q9HB15|KCNKC_HUMAN Potassium channel subfamily K member 12 OS=Homo sapiens OX=9606 GN=KCNK12 PE=2 SV=1	9	PPRRSRRRLPRPSCCCCCCRRSHLNEDTGRF
0.3	P16144	sp|P16144|ITB4_HUMAN Integrin beta-4 OS=Homo sapiens OX=9606 GN=ITGB4 PE=1 SV=5	733	WKYCACCKACLALLPCCNRGHMVGFKEDHYM
0.25	Q8IWA5	sp|Q8IWA5|CTL2_HUMAN Choline transporter-like protein 2 OS=Homo sapiens OX=9606 GN=SLC44A2 PE=1 SV=3	531	AAENKFAKCLMTCLKCCFWCLEKFIKFLNRN
0.25	Q969N4	sp|Q969N4|TAAR8_HUMAN Trace amine-associated receptor 8 OS=Homo sapiens OX=9606 GN=TAAR8 PE=2 SV=1	96	CWYFGAKFCTLHSCCDVAFCYSSVLHLCFIC
0.25	P54756	sp|P54756|EPHA5_HUMAN Ephrin type-A receptor 5 OS=Homo sapiens OX=9606 GN=EPHA5 PE=1 SV=3	594	LSGSCCECGCGRASSLCAVAHPSLIWRCGYS
0.25	P22413	sp|P22413|ENPP1_HUMAN Ectonucleotide pyrophosphatase/phosphodiesterase family member 1 OS=Homo sapiens OX=9606 GN=ENPP1 PE=1 SV=2	107	SCKGRCFERTFGNCRCDAACVELGNCCLDYQ
0.25	P04626	sp|P04626|ERBB2_HUMAN Receptor tyrosine-protein kinase erbB-2 OS=Homo sapiens OX=9606 GN=ERBB2 PE=1 SV=1	623	CQPCPINCTHSCVDLDDKGCPAEQRASPLTS
0.25	O95500	sp|O95500|CLD14_HUMAN Claudin-14 OS=Homo sapiens OX=9606 GN=CLDN14 PE=1 SV=1	88	CLLSGIACACAVIGMKCTRCAKGTPAKTTFA
0.25	Q96N68	sp|Q96N68|CR015_HUMAN Putative uncharacterized protein C18orf15 OS=Homo sapiens OX=9606 GN=C18orf15 PE=5 SV=1	113	RGPCCPVHPQSLTVVCMCACMCVCVHVCACV
0.25	Q96AW1	sp|Q96AW1|VOPP1_HUMAN Vesicular prosurvival protein 1 OS=Homo sapiens OX=9606 GN=VOPP1 PE=2 SV=1	32	LYPTYYICRSYEDCCGSRCCVRALSIQRLWY
0.25	Q96RI8	sp|Q96RI8|TAAR6_HUMAN Trace amine-associated receptor 6 OS=Homo sapiens OX=9606 GN=TAAR6 PE=2 SV=1	97	CWYFGRSFCTFHTCCDVAFCYSSLFHLCFIS
0.25	Q14162	sp|Q14162|SREC_HUMAN Scavenger receptor class F member 1 OS=Homo sapiens OX=9606 GN=SCARF1 PE=1 SV=3	393	NCSVPCECPEGLCHPVSGSCQPGSGSRDTAL
0.25	Q96J86	sp|Q96J86|CYYR1_HUMAN Cysteine and tyrosine-rich protein 1 OS=Homo sapiens OX=9606 GN=CYYR1 PE=2 SV=1	32	GKDCKSYCCDGTTPYCCSYYAYIGNILSGTA
0.25	Q96GP6	sp|Q96GP6|SREC2_HUMAN Scavenger receptor class F member 2 OS=Homo sapiens OX=9606 GN=SCARF2 PE=1 SV=5	414	DCAQACSCHEDTCDPVTGACHLETNQRKGVM
0.25	O14894	sp|O14894|T4S5_HUMAN Transmembrane 4 L6 family member 5 OS=Homo sapiens OX=9606 GN=TM4SF5 PE=1 SV=2	67	AVRAGGKGCCGAGCCGNRCRMLRSVFSSAFG
0.25	Q8TE23	sp|Q8TE23|TS1R2_HUMAN Taste receptor type 1 member 2 OS=Homo sapiens OX=9606 GN=TAS1R2 PE=3 SV=2	628	STCLCRQALFPLCFTICISCIAVRSFQIVCA
0.25	Q66K66	sp|Q66K66|TM198_HUMAN Transmembrane protein 198 OS=Homo sapiens OX=9606 GN=TMEM198 PE=1 SV=1	40	LVCIMCCLFGVVYCFFGYRCFKAVLFLTGLL
0.25	Q9BSA4	sp|Q9BSA4|TTYH2_HUMAN Protein tweety homolog 2 OS=Homo sapiens OX=9606 GN=TTYH2 PE=1 SV=3	69	CACHCRRDDAVQTKQHHSCCITWTAVVAGLI
0.25	Q9NX94	sp|Q9NX94|WBP1L_HUMAN WW domain binding protein 1-like OS=Homo sapiens OX=9606 GN=WBP1L PE=1 SV=2	17	TNNQSYICDTGHCCGQSQCCNYYYELWWFWL
0.25	Q93038	sp|Q93038|TNR25_HUMAN Tumor necrosis factor receptor superfamily member 25 OS=Homo sapiens OX=9606 GN=TNFRSF25 PE=1 SV=2	176	CVSCPTSTLGSCPERCAAVCGWRQMFWVQVL
0.25	Q9H6R6	sp|Q9H6R6|ZDHC6_HUMAN Palmitoyltransferase ZDHHC6 OS=Homo sapiens OX=9606 GN=ZDHHC6 PE=1 SV=1	117	KCNRCVMKMDHHCPWINNCCGYQNHASFTLF
0.25	Q8IUH4	sp|Q8IUH4|ZDH13_HUMAN Palmitoyltransferase ZDHHC13 OS=Homo sapiens OX=9606 GN=ZDHHC13 PE=1 SV=3	441	HCHVCNCCVARYDQHCLWTGRCIGFGNHHYY
0.25	O00220	sp|O00220|TR10A_HUMAN Tumor necrosis factor receptor superfamily member 10A OS=Homo sapiens OX=9606 GN=TNFRSF10A PE=1 SV=3	262	CCIGSGCGGDPKCMDRVCFWRLGLLRGPGAE
0.25	Q9C0H2	sp|Q9C0H2|TTYH3_HUMAN Protein tweety homolog 3 OS=Homo sapiens OX=9606 GN=TTYH3 PE=1 SV=3	66	FWLCCRRRKSEEHLDADCCCTAWCVIIATLV
0.25	Q5JW98	sp|Q5JW98|CAHM4_HUMAN Calcium homeostasis modulator protein 4 OS=Homo sapiens OX=9606 GN=CALHM4 PE=1 SV=1	82	CCSCAPPYRRISPLECKLACLRFFSITGRAV
0.25	Q86WK7	sp|Q86WK7|AMGO3_HUMAN Amphoterin-induced protein 3 OS=Homo sapiens OX=9606 GN=AMIGO3 PE=2 SV=1	404	APPCRCCRRACRCRRWPQTPSPLQELSAQSS
0.25	P24530	sp|P24530|EDNRB_HUMAN Endothelin receptor type B OS=Homo sapiens OX=9606 GN=EDNRB PE=1 SV=1	389	VSKRFKNCFKSCLCCWCQSFEEKQSLEEKQS
0.25	Q6TCH7	sp|Q6TCH7|PAQR3_HUMAN Progestin and adipoQ receptor family member 3 OS=Homo sapiens OX=9606 GN=PAQR3 PE=1 SV=2	102	REDFVICSICLFCFQVCMLCSVGYHLFSCHR
0.25	Q9Y5F7	sp|Q9Y5F7|PCDGL_HUMAN Protocadherin gamma-C4 OS=Homo sapiens OX=9606 GN=PCDHGC4 PE=2 SV=1	714	KCLRGAACGVTCFPAGTCACLTRSRRREGLP
0.25	Q8NCS7	sp|Q8NCS7|CTL5_HUMAN Choline transporter-like protein 5 OS=Homo sapiens OX=9606 GN=SLC44A5 PE=2 SV=5	542	RTQNTLSKFLQCCLRCCFWCLENAIKFLNRN
0.25	O43490	sp|O43490|PROM1_HUMAN Prominin-1 OS=Homo sapiens OX=9606 GN=PROM1 PE=1 SV=1	129	FFCMCRCCNKCGGEMHQRQKENGPFLRKCFA
0.25	Q7Z419	sp|Q7Z419|R144B_HUMAN E3 ubiquitin-protein ligase RNF144B OS=Homo sapiens OX=9606 GN=RNF144B PE=1 SV=1	278	LASPCIICCVCKSCRGKKKKHDPSTT
0.25	Q9H158	sp|Q9H158|PCDC1_HUMAN Protocadherin alpha-C1 OS=Homo sapiens OX=9606 GN=PCDHAC1 PE=2 SV=2	704	CTKLHQSPGCCAQSCCRSTEDLRYGSKMVSN
0.25	Q9H3V2	sp|Q9H3V2|MS4A5_HUMAN Membrane-spanning 4-domains subfamily A member 5 OS=Homo sapiens OX=9606 GN=MS4A5 PE=2 SV=1	181	SLPFSILGCHSEDCDCEQCC
0.25	P53801	sp|P53801|PTTG_HUMAN Pituitary tumor-transforming gene 1 protein-interacting protein OS=Homo sapiens OX=9606 GN=PTTG1IP PE=1 SV=1	117	CCCCCRRKRSRKPDRSEEKAMREREERRIRQ
0.25	Q14943	sp|Q14943|KI3S1_HUMAN Killer cell immunoglobulin-like receptor 3DS1 OS=Homo sapiens OX=9606 GN=KIR3DS1 PE=1 SV=2	360	LHRWCSNKKKCCCNGPRACREQK
0.25	Q5T848	sp|Q5T848|GP158_HUMAN Probable G-protein coupled receptor 158 OS=Homo sapiens OX=9606 GN=GPR158 PE=1 SV=1	389	AYVCLPCREGCPFCADDSPCFVQEDKYLRLA
0.25	Q6PRD1	sp|Q6PRD1|GP179_HUMAN Probable G-protein coupled receptor 179 OS=Homo sapiens OX=9606 GN=GPR179 PE=1 SV=2	353	LLQCLPCPEGCTSCMDATPCLVEEAAVLRAA
0.25	P00533	sp|P00533|EGFR_HUMAN Epidermal growth factor receptor OS=Homo sapiens OX=9606 GN=EGFR PE=1 SV=2	617	CHLCHPNCTYGCTGPGLEGCPTNGPKIPSIA
0.25	P51795	sp|P51795|CLCN5_HUMAN H(+)/Cl(-) exchange transporter 5 OS=Homo sapiens OX=9606 GN=CLCN5 PE=1 SV=2	279	GKEGPLVHVACCCGNILCHCFNKYRKNEAKR
0.2	Q8TD43	sp|Q8TD43|TRPM4_HUMAN Transient receptor potential cation channel subfamily M member 4 OS=Homo sapiens OX=9606 GN=TRPM4 PE=1 SV=1	753	SGRPGCCGGRCGGRRCLRRWFHFWGAPVTIF
0.2	P0DKX4	sp|P0DKX4|SIM18_HUMAN Small integral membrane protein 18 OS=Homo sapiens OX=9606 GN=SMIM18 PE=4 SV=1	55	LYEVLDCCCCVKNKTVKDLKSEPNPLRSMMD
0.2	Q9C0B5	sp|Q9C0B5|ZDHC5_HUMAN Palmitoyltransferase ZDHHC5 OS=Homo sapiens OX=9606 GN=ZDHHC5 PE=1 SV=2	119	HCSVCDNCVEEFDHHCPWVNNCIGRRNYRYF
0.2	Q9NQ90	sp|Q9NQ90|ANO2_HUMAN Anoctamin-2 OS=Homo sapiens OX=9606 GN=ANO2 PE=1 SV=2	408	FTMCPLCDKSCDYWNLSSACGTAQASHLFDN
0.2	P0C7M8	sp|P0C7M8|CLC2L_HUMAN C-type lectin domain family 2 member L OS=Homo sapiens OX=9606 GN=CLEC2L PE=3 SV=1	92	GCIKCEAPCPEDWLLYGRKCYFFSEEPRDWN
0.2	Q86SQ6	sp|Q86SQ6|AGRA1_HUMAN Adhesion G protein-coupled receptor A1 OS=Homo sapiens OX=9606 GN=ADGRA1 PE=2 SV=3	305	HHCAKREDVWQCWWACCPPRKDAHPALDANG
0.2	Q9P0X4	sp|Q9P0X4|CAC1I_HUMAN Voltage-dependent T-type calcium channel subunit alpha-1I OS=Homo sapiens OX=9606 GN=CACNA1I PE=1 SV=1	93	CVTLGMYQPCDDMDCLSDRCKILQVFDDFIF
0.2	P20648	sp|P20648|ATP4A_HUMAN Potassium-transporting ATPase alpha chain 1 OS=Homo sapiens OX=9606 GN=ATP4A PE=2 SV=5	968	IAIVFQVCIGCFLCYCPGMPNIFNFMPIRFQ
0.2	Q9Y6M5	sp|Q9Y6M5|ZNT1_HUMAN Zinc transporter 1 OS=Homo sapiens OX=9606 GN=SLC30A1 PE=1 SV=3	272	SWKGCSEGDFCVNPCFPDPCKAFVEIINSTH
0.2	Q8WTX9	sp|Q8WTX9|ZDHC1_HUMAN Palmitoyltransferase ZDHHC1 OS=Homo sapiens OX=9606 GN=ZDHHC1 PE=1 SV=1	156	CVCGFDHHCKWLNNCVGERNYRLFLHSVASA
0.2	Q8IZN3	sp|Q8IZN3|ZDH14_HUMAN Palmitoyltransferase ZDHHC14 OS=Homo sapiens OX=9606 GN=ZDHHC14 PE=1 SV=1	179	SHCSLCDNCVERFDHHCPWVGNCVGKRNYRF
0.2	Q8WVZ1	sp|Q8WVZ1|ZDH19_HUMAN Palmitoyltransferase ZDHHC19 OS=Homo sapiens OX=9606 GN=ZDHHC19 PE=1 SV=2	130	WCNICVEDFDHHCKWVNNCIGHRNFRFFMLL
0.2	Q9NVA4	sp|Q9NVA4|T184C_HUMAN Transmembrane protein 184C OS=Homo sapiens OX=9606 GN=TMEM184C PE=1 SV=2	153	FPPLCCCPPWAMGEVLLFRCKLGVLQYTVVR
0.2	Q92536	sp|Q92536|YLAT2_HUMAN Y+L amino acid transporter 2 OS=Homo sapiens OX=9606 GN=SLC7A6 PE=1 SV=3	165	ACRLLAAACICLLTFVNCAYVKWGTRVQDTF
0.2	Q96GR4	sp|Q96GR4|ZDH12_HUMAN Palmitoyltransferase ZDHHC12 OS=Homo sapiens OX=9606 GN=ZDHHC12 PE=2 SV=2	111	RHCRECRRCVRRYDHHCPWMENCVGERNHPL
0.2	Q9H6B9	sp|Q9H6B9|EPHX3_HUMAN Epoxide hydrolase 3 OS=Homo sapiens OX=9606 GN=EPHX3 PE=1 SV=1	47	VLCRPRRGCCGRRRSASPACLSDPSLGEHGF
0.2	Q6ZN68	sp|Q6ZN68|D19P2_HUMAN Putative C-mannosyltransferase DPY19L2P2 OS=Homo sapiens OX=9606 GN=DPY19L2P2 PE=5 SV=2	324	GDISRVLATNVYLRCCLCRCHAYNGKCQAVY
0.2	P29275	sp|P29275|AA2BR_HUMAN Adenosine receptor A2b OS=Homo sapiens OX=9606 GN=ADORA2B PE=1 SV=1	152	NNCTEPWDGTTNESCCLVKCLFENVVPMSYM
0.2	A6NFA0	sp|A6NFA0|F205C_HUMAN Protein FAM205C OS=Homo sapiens OX=9606 GN=FAM205C PE=3 SV=2	30	QVKKSCQKLSLVPNRSCCRCHRRVQQKSGDR
0.2	Q6UY11	sp|Q6UY11|DLK2_HUMAN Protein delta homolog 2 OS=Homo sapiens OX=9606 GN=DLK2 PE=2 SV=1	334	RGVCPPGPCCYPAPHYAPACQDQECQVSMLP
0.2	Q9NY35	sp|Q9NY35|CLDN1_HUMAN Claudin domain-containing protein 1 OS=Homo sapiens OX=9606 GN=CLDND1 PE=1 SV=1	145	FVSLGLMCFGALIGLCACICRSLYPTIATGI
0.2	Q96F81	sp|Q96F81|DISP1_HUMAN Protein dispatched homolog 1 OS=Homo sapiens OX=9606 GN=DISP1 PE=1 SV=3	1127	FQCMCRCLGPQGTCGQIPLPKKLQCSAFSHA
0.2	Q5R3K3	sp|Q5R3K3|CAHM6_HUMAN Calcium homeostasis modulator protein 6 OS=Homo sapiens OX=9606 GN=CALHM6 PE=1 SV=1	80	GCCSSARASCGSALRGSLVCTQISAAAALAP
0.2	P48066	sp|P48066|S6A11_HUMAN Sodium- and chloride-dependent GABA transporter 3 OS=Homo sapiens OX=9606 GN=SLC6A11 PE=2 SV=1	323	YNNYNNNCYRDCIMLCCLNSGTSFVAGFAIF
0.2	A1A5C7	sp|A1A5C7|S22AN_HUMAN Solute carrier family 22 member 23 OS=Homo sapiens OX=9606 GN=SLC22A23 PE=1 SV=2	595	KGYFLHHIIFACCTLICIICILLLPESRDQN
0.2	Q9NY91	sp|Q9NY91|SC5A4_HUMAN Solute carrier family 5 member 4 OS=Homo sapiens OX=9606 GN=SLC5A4 PE=1 SV=1	298	VQRCLCGKDMSHVKAACIMCAYLKLLPMFLM
0.2	P53794	sp|P53794|SC5A3_HUMAN Sodium/myo-inositol cotransporter OS=Homo sapiens OX=9606 GN=SLC5A3 PE=1 SV=2	327	DIACINPEHCMLVCGSRAGCSNIAYPRLVMK
0.2	A0A1B0GUA7	sp|A0A1B0GUA7|TEX51_HUMAN Testis-expressed protein 51 OS=Homo sapiens OX=9606 GN=TEX51 PE=3 SV=1	111	VTSCADCRTHFLSCNDPTFCPARNRRTSLWA
0.2	Q8N9I0	sp|Q8N9I0|SYT2_HUMAN Synaptotagmin-2 OS=Homo sapiens OX=9606 GN=SYT2 PE=1 SV=2	83	ICKKCCCKKKKNKKEKGKGMKNAMNMKDMKG
0.2	Q9UP95	sp|Q9UP95|S12A4_HUMAN Solute carrier family 12 member 4 OS=Homo sapiens OX=9606 GN=SLC12A4 PE=1 SV=2	144	MVGTAGVLQALLIVLICCCCTLLTAISMSAI
0.2	O60636	sp|O60636|TSN2_HUMAN Tetraspanin-2 OS=Homo sapiens OX=9606 GN=TSPAN2 PE=1 SV=2	75	FGCCGAMRESQCVLGSFFTCLLVIFAAEVTT
0.2	A2RRL7	sp|A2RRL7|TM213_HUMAN Transmembrane protein 213 OS=Homo sapiens OX=9606 GN=TMEM213 PE=3 SV=2	44	PGTLEQCLNVDFCPQAARCCRTGVDEYGWIA
0.2	Q6GV28	sp|Q6GV28|TM225_HUMAN Transmembrane protein 225 OS=Homo sapiens OX=9606 GN=TMEM225 PE=2 SV=1	162	CKLSTSSCTCLNIHKSDNECKESENSIEDIS
0.2	P55011	sp|P55011|S12A2_HUMAN Solute carrier family 12 member 2 OS=Homo sapiens OX=9606 GN=SLC12A2 PE=1 SV=1	563	CTSAACKLNFDFSSCESSPCSYGLMNNFQVM
0.2	Q86VR7	sp|Q86VR7|VS10L_HUMAN V-set and immunoglobulin domain-containing protein 10-like OS=Homo sapiens OX=9606 GN=VSIG10L PE=2 SV=2	797	LCICCLCRFRGKTPEKKKHPSTLVPVVTPSE
0.2	Q9H313	sp|Q9H313|TTYH1_HUMAN Protein tweety homolog 1 OS=Homo sapiens OX=9606 GN=TTYH1 PE=1 SV=1	70	CCCRPPEPPGSKIPSPGGGCVTWSCIVALLA
0.2	Q7Z403	sp|Q7Z403|TMC6_HUMAN Transmembrane channel-like protein 6 OS=Homo sapiens OX=9606 GN=TMC6 PE=1 SV=2	190	RGQPGSGGVCSCCGRLRYACVLALHSLGLAL
0.2	Q8WZ59	sp|Q8WZ59|TM190_HUMAN Transmembrane protein 190 OS=Homo sapiens OX=9606 GN=TMEM190 PE=1 SV=1	52	PNLCLRLRCCYRNGVCYHQRPDENVRRKHMW
0.2	Q9BSE2	sp|Q9BSE2|TMM79_HUMAN Transmembrane protein 79 OS=Homo sapiens OX=9606 GN=TMEM79 PE=1 SV=1	174	WAEAVVRPPGCSCGGCGSCGDREWLRAVASV
0.2	Q8NFZ6	sp|Q8NFZ6|VN1R2_HUMAN Vomeronasal type-1 receptor 2 OS=Homo sapiens OX=9606 GN=VN1R2 PE=2 SV=2	367	LMCRDPSRSRLCSICCRRNRRFFHDFRKM
0.2	Q9H2X9	sp|Q9H2X9|S12A5_HUMAN Solute carrier family 12 member 5 OS=Homo sapiens OX=9606 GN=SLC12A5 PE=1 SV=3	154	ESFCMVFICCSCTMLTAISMSAIATNGVVPA
0.2	Q9Y397	sp|Q9Y397|ZDHC9_HUMAN Palmitoyltransferase ZDHHC9 OS=Homo sapiens OX=9606 GN=ZDHHC9 PE=1 SV=2	154	HCSICDNCVERFDHHCPWVGNCVGKRNYRYF
0.2	P0DPA2	sp|P0DPA2|VSIG8_HUMAN V-set and immunoglobulin domain-containing protein 8 OS=Homo sapiens OX=9606 GN=VSIG8 PE=2 SV=1	284	WGLVCCCCGGSGAGGARGAFGYGNGGGVGGG
0.2	Q92959	sp|Q92959|SO2A1_HUMAN Solute carrier organic anion transporter family member 2A1 OS=Homo sapiens OX=9606 GN=SLCO2A1 PE=1 SV=2	492	CSCVTGGSASAKTGSCPVPCAHFLLPAIFLI
0.2	Q8TCT6	sp|Q8TCT6|SPPL3_HUMAN Signal peptide peptidase-like 3 OS=Homo sapiens OX=9606 GN=SPPL3 PE=1 SV=2	118	CQYLTRPCSPQNKISFGCCGRFTAAELLSFS
0.2	P13866	sp|P13866|SC5A1_HUMAN Sodium/glucose cotransporter 1 OS=Homo sapiens OX=9606 GN=SLC5A1 PE=1 SV=1	342	KIACVVPSECEKYCGTKVGCTNIAYPTLVVE
0.2	Q14714	sp|Q14714|SSPN_HUMAN Sarcospan OS=Homo sapiens OX=9606 GN=SSPN PE=2 SV=3	31	KGTGAPKECGEEEPRTCCGCRFPLLLALLQL
0.2	Q8NDX2	sp|Q8NDX2|VGLU3_HUMAN Vesicular glutamate transporter 3 OS=Homo sapiens OX=9606 GN=SLC17A8 PE=1 SV=1	51	EGRPVQTSRPSPPLCDCHCCGLPKRYIIAIM
0.2	Q9Y5I4	sp|Q9Y5I4|PCDC2_HUMAN Protocadherin alpha-C2 OS=Homo sapiens OX=9606 GN=PCDHAC2 PE=2 SV=1	729	IKCYRYTAYGTACCGGFCGVRERSPAELYKQ
0.2	Q8NBV8	sp|Q8NBV8|SYT8_HUMAN Synaptotagmin-8 OS=Homo sapiens OX=9606 GN=SYT8 PE=2 SV=4	69	AACCCCRRHRKKPRDKESVGLGSARGTTTTH
0.2	Q6UWV7	sp|Q6UWV7|SHL2A_HUMAN Protein shisa-like-2A OS=Homo sapiens OX=9606 GN=SHISAL2A PE=1 SV=2	24	PGGEAAAVFCCGFRDHKYCCDDPHSFFPYEH
0.2	Q6UWI4	sp|Q6UWI4|SHSA2_HUMAN Protein shisa-2 homolog OS=Homo sapiens OX=9606 GN=SHISA2 PE=1 SV=1	131	LGSLVAACCCRCLRPKQDPQQSRAPGGNRLM
0.2	Q7Z402	sp|Q7Z402|TMC7_HUMAN Transmembrane channel-like protein 7 OS=Homo sapiens OX=9606 GN=TMC7 PE=1 SV=1	467	TSCDDDTCDLCGYNQKLYPCWETQVGQEMYK
0.2	Q12999	sp|Q12999|TSN31_HUMAN Tetraspanin-31 OS=Homo sapiens OX=9606 GN=TSPAN31 PE=1 SV=1	144	DFCTAICKSQSPTCQMCGEKFLKHSDEALKI
0.2	A0A0U1RQS6	sp|A0A0U1RQS6|TM275_HUMAN Transmembrane protein 275 OS=Homo sapiens OX=9606 GN=TMEM275 PE=3 SV=1	32	CCACGLCALLAGVNVTLAGAFASFLPEHNAL
0.2	Q8N661	sp|Q8N661|TM86B_HUMAN Lysoplasmalogenase OS=Homo sapiens OX=9606 GN=TMEM86B PE=1 SV=2	18	RPDVCRWLSPFILSCCVYFCLWIPEDQLSWF
0.2	P07949	sp|P07949|RET_HUMAN Proto-oncogene tyrosine-protein kinase receptor Ret OS=Homo sapiens OX=9606 GN=RET PE=1 SV=3	606	YGTCNCFPEEEKCFCEPEDIQDPLCDELCRT
0.2	Q96RI9	sp|Q96RI9|TAAR9_HUMAN Trace amine-associated receptor 9 OS=Homo sapiens OX=9606 GN=TAAR9 PE=1 SV=1	97	CWYFGDSYCKFHTCFDTSFCFASLFHLCCIS
0.2	O95977	sp|O95977|S1PR4_HUMAN Sphingosine 1-phosphate receptor 4 OS=Homo sapiens OX=9606 GN=S1PR4 PE=1 SV=1	309	FRSREVCRAVLSFLCCGCLRLGMRGPGDCLA
0.2	Q8IUH5	sp|Q8IUH5|ZDH17_HUMAN Palmitoyltransferase ZDHHC17 OS=Homo sapiens OX=9606 GN=ZDHHC17 PE=1 SV=2	451	KHCGVCNRCIAKFDHHCPWVGNCVGAGNHRY
0.2	P25445	sp|P25445|TNR6_HUMAN Tumor necrosis factor receptor superfamily member 6 OS=Homo sapiens OX=9606 GN=FAS PE=1 SV=1	146	CTKCEHGIIKECTLTSNTKCKEEGSRSNLGW
0.2	P19438	sp|P19438|TNR1A_HUMAN Tumor necrosis factor receptor superfamily member 1A OS=Homo sapiens OX=9606 GN=TNFRSF1A PE=1 SV=1	182	CSNCKKSLECTKLCLPQIENVKGTEDSGTTV
0.2	Q8IYP9	sp|Q8IYP9|ZDH23_HUMAN Palmitoyltransferase ZDHHC23 OS=Homo sapiens OX=9606 GN=ZDHHC23 PE=1 SV=3	273	WHCRICGICVRRMDHHCVWINSCVGESNHQA
0.2	Q9NXF8	sp|Q9NXF8|ZDHC7_HUMAN Palmitoyltransferase ZDHHC7 OS=Homo sapiens OX=9606 GN=ZDHHC7 PE=1 SV=2	144	HHCSICKRCIRKMDHHCPWVNNCVGEKNQRF
0.2	Q8IVQ6	sp|Q8IVQ6|ZDH21_HUMAN Palmitoyltransferase ZDHHC21 OS=Homo sapiens OX=9606 GN=ZDHHC21 PE=1 SV=1	104	HHCSRCGHCVRRMDHHCPWINNCVGEDNHWL
0.2	P01135	sp|P01135|TGFA_HUMAN Protransforming growth factor alpha OS=Homo sapiens OX=9606 GN=TGFA PE=1 SV=1	124	CQVRKHCEWCRALICRHEKPSALLKGRTACC
0.2	Q5HYL7	sp|Q5HYL7|TM196_HUMAN Transmembrane protein 196 OS=Homo sapiens OX=9606 GN=TMEM196 PE=1 SV=2	47	SSPVWSGVCFLLCGICGILCAKKKSGLVMIL
0.2	Q9NUE0	sp|Q9NUE0|ZDH18_HUMAN Palmitoyltransferase ZDHHC18 OS=Homo sapiens OX=9606 GN=ZDHHC18 PE=1 SV=2	206	SHCSVCDNCVERFDHHCPWVGNCVGRRNYRF
0.2	Q4KMG9	sp|Q4KMG9|TM52B_HUMAN Transmembrane protein 52B OS=Homo sapiens OX=9606 GN=TMEM52B PE=1 SV=1	60	LTSLCFRCCCLSRQQNGEDGGPPPCEVTVIA
0.2	Q9Y5Y9	sp|Q9Y5Y9|SCNAA_HUMAN Sodium channel protein type 10 subunit alpha OS=Homo sapiens OX=9606 GN=SCN10A PE=1 SV=2	630	KCPPCLTSLSQKYLIWDCCPMWVKLKTILFG
0.2	Q969W1	sp|Q969W1|ZDH16_HUMAN Palmitoyltransferase ZDHHC16 OS=Homo sapiens OX=9606 GN=ZDHHC16 PE=1 SV=1	169	HHCSICNRCVLKMDHHCPWLNNCVGHYNHRY
0.2	P57727	sp|P57727|TMPS3_HUMAN Transmembrane protease serine 3 OS=Homo sapiens OX=9606 GN=TMPRSS3 PE=1 SV=2	73	CSGKYRCRSSFKCIELIARCDGVSDCKDGED
0.2	Q9UHW9	sp|Q9UHW9|S12A6_HUMAN Solute carrier family 12 member 6 OS=Homo sapiens OX=9606 GN=SLC12A6 PE=1 SV=2	211	VVGTAGVLQAFAIVLICCCCTMLTAISMSAI
0.2	Q2T9K0	sp|Q2T9K0|TMM44_HUMAN Transmembrane protein 44 OS=Homo sapiens OX=9606 GN=TMEM44 PE=1 SV=3	50	LRCAQKPRQDQSALCAACCLLTSLCDTVGAL
0.2	Q6P5W5	sp|Q6P5W5|S39A4_HUMAN Zinc transporter ZIP4 OS=Homo sapiens OX=9606 GN=SLC39A4 PE=1 SV=4	334	TLLICLCAVFGLLLLTCTGCRGVTHYILQTF
0.2	Q5M8T2	sp|Q5M8T2|S35D3_HUMAN Solute carrier family 35 member D3 OS=Homo sapiens OX=9606 GN=SLC35D3 PE=2 SV=1	227	CIFVACILIGCAMNFTTLHCTYINSAVTTSF
0.2	Q2M3M2	sp|Q2M3M2|SC5A9_HUMAN Sodium/glucose cotransporter 4 OS=Homo sapiens OX=9606 GN=SLC5A9 PE=1 SV=2	346	EVGCVDPDVCQRICGARVGCSNIAYPKLVMA
0.2	Q96MV8	sp|Q96MV8|ZDH15_HUMAN Palmitoyltransferase ZDHHC15 OS=Homo sapiens OX=9606 GN=ZDHHC15 PE=1 SV=1	143	HHCSVCAMCVLKMDHHCPWVNNCIGFSNYKF
0.2	O94956	sp|O94956|SO2B1_HUMAN Solute carrier organic anion transporter family member 2B1 OS=Homo sapiens OX=9606 GN=SLCO2B1 PE=1 SV=2	538	NCSCVVEGNPVLAGSCDSTCSHLVVPFLLLV
0.2	Q8WWX8	sp|Q8WWX8|SC5AB_HUMAN Sodium/myo-inositol cotransporter 2 OS=Homo sapiens OX=9606 GN=SLC5A11 PE=1 SV=1	337	QVACADPEICQKICSNPSGCSDIAYPKLVLE
0.2	Q9UIJ5	sp|Q9UIJ5|ZDHC2_HUMAN Palmitoyltransferase ZDHHC2 OS=Homo sapiens OX=9606 GN=ZDHHC2 PE=1 SV=1	141	HHCSVCDKCILKMDHHCPWVNNCVGFSNYKF
0.2	Q6UX98	sp|Q6UX98|ZDH24_HUMAN Probable palmitoyltransferase ZDHHC24 OS=Homo sapiens OX=9606 GN=ZDHHC24 PE=1 SV=1	108	GHCSACRVCILRRDHHCRLLGRCVGFGNYRP
0.2	O00445	sp|O00445|SYT5_HUMAN Synaptotagmin-5 OS=Homo sapiens OX=9606 GN=SYT5 PE=1 SV=2	45	SCCFCLYRKSCRRRTGKKSQAQAQVHLQEVK
0.2	Q5W0Z9	sp|Q5W0Z9|ZDH20_HUMAN Palmitoyltransferase ZDHHC20 OS=Homo sapiens OX=9606 GN=ZDHHC20 PE=1 SV=1	140	HHCSACDSCILKMDHHCPWVNNCVGFSNYKF
0.2	Q9NPG8	sp|Q9NPG8|ZDHC4_HUMAN Palmitoyltransferase ZDHHC4 OS=Homo sapiens OX=9606 GN=ZDHHC4 PE=1 SV=1	163	KHCSVCNWCVHRFDHHCVWVNNCIGAWNIRY
0.2	Q9NYG2	sp|Q9NYG2|ZDHC3_HUMAN Palmitoyltransferase ZDHHC3 OS=Homo sapiens OX=9606 GN=ZDHHC3 PE=1 SV=2	142	HCSVCKRCIRKMDHHCPWVNNCVGENNQKYF
0.2	Q6IWH7	sp|Q6IWH7|ANO7_HUMAN Anoctamin-7 OS=Homo sapiens OX=9606 GN=ANO7 PE=1 SV=2	381	TQELCGSKDSFEMCPLCLDCPFWLLSSACAL
0.2	P81408	sp|P81408|F189B_HUMAN Protein FAM189B OS=Homo sapiens OX=9606 GN=FAM189B PE=1 SV=2	120	AQLARDFQQCSLEGKVCVCCPSVPLLRPCPE
0.2	Q02413	sp|Q02413|DSG1_HUMAN Desmoglein-1 OS=Homo sapiens OX=9606 GN=DSG1 PE=1 SV=2	570	CCDCGGAPRSAAGFEPVPECSDGAIHSWAVE
0.2	Q8N4C9	sp|Q8N4C9|CQ078_HUMAN Uncharacterized protein C17orf78 OS=Homo sapiens OX=9606 GN=C17orf78 PE=2 SV=2	207	EVPCPYQCLGARKLCQCQWLWRWQKKGGQPP
0.2	A7MBM2	sp|A7MBM2|DISP2_HUMAN Protein dispatched homolog 2 OS=Homo sapiens OX=9606 GN=DISP2 PE=2 SV=2	1093	MMVKCVSCGFASFFFQSLCCFFGPEKNCGQI
0.2	P25100	sp|P25100|ADA1D_HUMAN Alpha-1D adrenergic receptor OS=Homo sapiens OX=9606 GN=ADRA1D PE=1 SV=2	169	CDVWAAVDVLCCTASILSLCTISVDRYVGVR
0.2	Q9H6U8	sp|Q9H6U8|ALG9_HUMAN Alpha-1 2-mannosyltransferase ALG9 OS=Homo sapiens OX=9606 GN=ALG9 PE=1 SV=2	143	RCLLAFVSCICELYFYKAVCKKFGLHVSRMM
0.2	Q4KMQ2	sp|Q4KMQ2|ANO6_HUMAN Anoctamin-6 OS=Homo sapiens OX=9606 GN=ANO6 PE=1 SV=2	346	IMCPQCDRLCPFWKLNITCESSKKLCIFDSF
0.2	P47775	sp|P47775|GPR12_HUMAN G-protein coupled receptor 12 OS=Homo sapiens OX=9606 GN=GPR12 PE=1 SV=1	303	FRNQEIQKALCLICCGCIPSSLAQRARSPSD
0.2	Q8IZ08	sp|Q8IZ08|GP135_HUMAN G-protein coupled receptor 135 OS=Homo sapiens OX=9606 GN=GPR135 PE=1 SV=2	283	VACYLLPFLLMCFCHYHICKTVRLSDVRVRP
0.2	Q9HCC8	sp|Q9HCC8|GDPD2_HUMAN Glycerophosphoinositol inositolphosphodiesterase GDPD2 OS=Homo sapiens OX=9606 GN=GDPD2 PE=2 SV=1	9	SVWARCLHCLYSCHWRKCPRERMQTSKCDCI
0.2	P46089	sp|P46089|GPR3_HUMAN G-protein coupled receptor 3 OS=Homo sapiens OX=9606 GN=GPR3 PE=1 SV=1	299	FRNQDVQKVLWAVCCCCSSSKIPFRSRSPSD
0.2	Q8N0W7	sp|Q8N0W7|FMR1N_HUMAN Fragile X mental retardation 1 neighbor protein OS=Homo sapiens OX=9606 GN=FMR1NB PE=2 SV=1	154	SECLRHKCCFSSSGTTSFKCFAPFRDVPKQM
0.2	P35348	sp|P35348|ADA1A_HUMAN Alpha-1A adrenergic receptor OS=Homo sapiens OX=9606 GN=ADRA1A PE=1 SV=2	99	CNIWAAVDVLCCTASIMGLCIISIDRYIGVS
0.2	Q9NZD1	sp|Q9NZD1|GPC5D_HUMAN G-protein coupled receptor family C group 5 member D OS=Homo sapiens OX=9606 GN=GPRC5D PE=1 SV=1	261	ELCILYRSCRQECPLQGNACPVTAYQHSFQV
0.2	Q99795	sp|Q99795|GPA33_HUMAN Cell surface A33 antigen OS=Homo sapiens OX=9606 GN=GPA33 PE=1 SV=1	256	IYCCCCRGKDDNTEDKEDARPNREAYEEPPE
0.2	Q9H295	sp|Q9H295|DCSTP_HUMAN Dendritic cell-specific transmembrane protein OS=Homo sapiens OX=9606 GN=DCSTAMP PE=1 SV=1	61	AAASWIITCVLLCCSKHARCFILLVFLSCGL
0.2	A0PJK1	sp|A0PJK1|SC5AA_HUMAN Sodium/glucose cotransporter 5 OS=Homo sapiens OX=9606 GN=SLC5A10 PE=1 SV=2	329	DVGCVVPSECLRACGAEVGCSNIAYPKLVME
0.2	K7EJ46	sp|K7EJ46|SIM22_HUMAN Small integral membrane protein 22 OS=Homo sapiens OX=9606 GN=SMIM22 PE=1 SV=2	52	VAHCCCCSSPGPRRESPRKERPKGVDNLALE
0.2	A6NKW6	sp|A6NKW6|SHL2B_HUMAN Protein shisa-like-2B OS=Homo sapiens OX=9606 GN=SHISAL2B PE=3 SV=2	35	YCCGFADLKYCCSEPGSYFPYKHSYMWSLSI
0.2	Q2M3R5	sp|Q2M3R5|S35G1_HUMAN Solute carrier family 35 member G1 OS=Homo sapiens OX=9606 GN=SLC35G1 PE=1 SV=1	39	APDRGRCWLCLSSPCCSRTEPEAKKKAPCPG
0.2	A6NNN8	sp|A6NNN8|S38A8_HUMAN Putative sodium-coupled neutral amino acid transporter 8 OS=Homo sapiens OX=9606 GN=SLC38A8 PE=1 SV=1	388	GLCLICAMGVEPIGPRVKCCLEVWGVVSVLV
0.2	O14975	sp|O14975|S27A2_HUMAN Very long-chain acyl-CoA synthetase OS=Homo sapiens OX=9606 GN=SLC27A2 PE=1 SV=2	131	MACLNYNIRAKSLLHCFQCCGAKVLLVSPEL
0.2	Q92521	sp|Q92521|PIGB_HUMAN GPI mannosyltransferase 3 OS=Homo sapiens OX=9606 GN=PIGB PE=1 SV=1	169	EVARWVFFCQLCSWFTWYCCTRTLTNTMETV
0.2	Q8TEZ7	sp|Q8TEZ7|PAQR8_HUMAN Membrane progestin receptor beta OS=Homo sapiens OX=9606 GN=PAQR8 PE=1 SV=1	184	AFCGWLSCAGCCYAKYRYRRPYPVMRKICQV
0.2	Q9UI33	sp|Q9UI33|SCNBA_HUMAN Sodium channel protein type 11 subunit alpha OS=Homo sapiens OX=9606 GN=SCN11A PE=1 SV=2	543	CLPCGENLASKYLVWNCCPQWLCVKKVLRTV
0.2	P50876	sp|P50876|R144A_HUMAN E3 ubiquitin-protein ligase RNF144A OS=Homo sapiens OX=9606 GN=RNF144A PE=1 SV=2	270	LATPFVLCCKCKCSKGDDDPLPT
0.2	Q92824	sp|Q92824|PCSK5_HUMAN Proprotein convertase subtilisin/kexin type 5 OS=Homo sapiens OX=9606 GN=PCSK5 PE=1 SV=4	1714	AQECCDCQDTTDECILRTSKVRPATEHFKTA
0.2	Q8NGZ2	sp|Q8NGZ2|O14K1_HUMAN Olfactory receptor 14K1 OS=Homo sapiens OX=9606 GN=OR14K1 PE=3 SV=2	120	RYAAICCPLHCEAVMSRGLCVQLMALSWLNR
0.2	Q14126	sp|Q14126|DSG2_HUMAN Desmoglein-2 OS=Homo sapiens OX=9606 GN=DSG2 PE=1 SV=2	580	CPEKQVLTLTVCECLHGSGCREAQHDSYVGL
0.2	P51788	sp|P51788|CLCN2_HUMAN Chloride channel protein 2 OS=Homo sapiens OX=9606 GN=CLCN2 PE=1 SV=2	60	ELLEYGRSRCARCRVCSVRCHKFLVSRVGED
0.2	Q6UXN8	sp|Q6UXN8|CLC9A_HUMAN C-type lectin domain family 9 member A OS=Homo sapiens OX=9606 GN=CLEC9A PE=1 SV=1	15	PAPDTYQKCLSSNKCSGACCLVMVISCVFCM
0.2	P41594	sp|P41594|GRM5_HUMAN Metabotropic glutamate receptor 5 OS=Homo sapiens OX=9606 GN=GRM5 PE=1 SV=2	615	RELCYIILAGICLGYLCTFCLIAKPKQIYCY
0.2	P18507	sp|P18507|GBRG2_HUMAN Gamma-aminobutyric acid receptor subunit gamma-2 OS=Homo sapiens OX=9606 GN=GABRG2 PE=1 SV=2	414	CASFFCCFEDCRTGAWRHGRIHIRIAKMDSY
0.2	Q96GL9	sp|Q96GL9|F163A_HUMAN Protein FAM163A OS=Homo sapiens OX=9606 GN=FAM163A PE=1 SV=1	26	CYCRLQYYCCKKSGTEVADEEEEREHDLPTH
0.2	Q9UMD9	sp|Q9UMD9|COHA1_HUMAN Collagen alpha-1(XVII) chain OS=Homo sapiens OX=9606 GN=COL17A1 PE=1 SV=3	443	GAGGGPWGPAPAWCPCGSCCSWWKWLLGLLL
0.2	P35367	sp|P35367|HRH1_HUMAN Histamine H1 receptor OS=Homo sapiens OX=9606 GN=HRH1 PE=1 SV=1	426	LCWIPYFIFFMVIAFCKNCCNEHLHMFTIWL
0.2	Q08828	sp|Q08828|ADCY1_HUMAN Adenylate cyclase type 1 OS=Homo sapiens OX=9606 GN=ADCY1 PE=1 SV=2	644	CICFLVACVLYLHITRVQCFPGCLTIQIRTV
0.2	P51674	sp|P51674|GPM6A_HUMAN Neuronal membrane glycoprotein M6-a OS=Homo sapiens OX=9606 GN=GPM6A PE=1 SV=2	2	EENMEEGQTQKGCFECCIKCLGGIPYASLIA
0.2	Q6P9F7	sp|Q6P9F7|LRC8B_HUMAN Volume-regulated anion channel subunit LRRC8B OS=Homo sapiens OX=9606 GN=LRRC8B PE=1 SV=2	47	LTQSRVLCCLPCKVEFDNHCAVPWDILKASM
0.2	P0C2L3	sp|P0C2L3|F163B_HUMAN Protein FAM163B OS=Homo sapiens OX=9606 GN=FAM163B PE=1 SV=1	26	CYCRLQYYCCKKDESEEDEEEPDFAVHSHLP
0.2	Q6ZMJ2	sp|Q6ZMJ2|SCAR5_HUMAN Scavenger receptor class A member 5 OS=Homo sapiens OX=9606 GN=SCARA5 PE=1 SV=1	31	KLNLCEDGPCHKRRASICCTQLGSLSALKHA
0.2	Q8TAB3	sp|Q8TAB3|PCD19_HUMAN Protocadherin-19 OS=Homo sapiens OX=9606 GN=PCDH19 PE=1 SV=3	708	KEIRTYNCSNCLTITCLLGCFIKGQNSKCLH
0.2	Q9NSD7	sp|Q9NSD7|RL3R1_HUMAN Relaxin-3 receptor 1 OS=Homo sapiens OX=9606 GN=RXFP3 PE=1 SV=1	192	RTRGHGRGDCCGRSLGDSCCFSAKALCVWIW
0.2	Q92508	sp|Q92508|PIEZ1_HUMAN Piezo-type mechanosensitive ion channel component 1 OS=Homo sapiens OX=9606 GN=PIEZO1 PE=1 SV=4	246	SRLCVAVGCFGAGHLICLYCYQMPLAQALLP
0.2	Q8NGN4	sp|Q8NGN4|O10G9_HUMAN Olfactory receptor 10G9 OS=Homo sapiens OX=9606 GN=OR10G9 PE=3 SV=1	239	TCASHCIVVLCFFVPCVFIYLRPGSRDVVDG
0.2	Q13639	sp|Q13639|5HT4R_HUMAN 5-hydroxytryptamine receptor 4 OS=Homo sapiens OX=9606 GN=HTR4 PE=1 SV=2	108	IFHLCCISLDRYYAICCQPLVYRNKMTPLRI
0.2	Q9UHJ9	sp|Q9UHJ9|PGAP2_HUMAN Post-GPI attachment to proteins factor 2 OS=Homo sapiens OX=9606 GN=PGAP2 PE=1 SV=2	94	AYWNHYLSCTSPCSCYRPLCRLNFGLNVVEN
0.2	Q8TF66	sp|Q8TF66|LRC15_HUMAN Leucine-rich repeat-containing protein 15 OS=Homo sapiens OX=9606 GN=LRRC15 PE=2 SV=2	559	VGCCCCKKRSQAVLMQMKAPNEC
0.2	A6NDA9	sp|A6NDA9|LRIT2_HUMAN Leucine-rich repeat immunoglobulin-like domain and transmembrane domain-containing protein 2 OS=Homo sapiens OX=9606 GN=LRIT2 PE=2 SV=1	490	CSCSKWVLRGCLHRRKAPSCTPAAPQSKDGS
0.2	Q96E93	sp|Q96E93|KLRG1_HUMAN Killer cell lectin-like receptor subfamily G member 1 OS=Homo sapiens OX=9606 GN=KLRG1 PE=1 SV=1	59	ILCQGSNYSTCASCPSCPDRWMKYGNHCYYF
0.2	Q9NR82	sp|Q9NR82|KCNQ5_HUMAN Potassium voltage-gated channel subfamily KQT member 5 OS=Homo sapiens OX=9606 GN=KCNQ5 PE=1 SV=3	184	CCCRYRGWQGRLRFARKPFCVIDTIVLIASI
0.2	Q15053	sp|Q15053|K0040_HUMAN Uncharacterized protein KIAA0040 OS=Homo sapiens OX=9606 GN=KIAA0040 PE=3 SV=2	47	CCHCCWSPPGKRGQQPEKNKKKKKKKKKKDE
0.2	Q9P2V4	sp|Q9P2V4|LRIT1_HUMAN Leucine-rich repeat immunoglobulin-like domain and transmembrane domain-containing protein 1 OS=Homo sapiens OX=9606 GN=LRIT1 PE=2 SV=1	547	VCCSALQKRCRKCFNKDSTEATVTYVNLERL
0.2	Q5XXA6	sp|Q5XXA6|ANO1_HUMAN Anoctamin-1 OS=Homo sapiens OX=9606 GN=ANO1 PE=1 SV=1	377	TMCPLCDKTCSYWKMSSACATARASHLFDNP
0.2	Q9H5I5	sp|Q9H5I5|PIEZ2_HUMAN Piezo-type mechanosensitive ion channel component 2 OS=Homo sapiens OX=9606 GN=PIEZO2 PE=1 SV=2	1165	IWPKYCCFLACIITFQYFICIGIPPAPCRDY
0.2	Q86SM8	sp|Q86SM8|MRGRE_HUMAN Mas-related G-protein coupled receptor member E OS=Homo sapiens OX=9606 GN=MRGPRE PE=2 SV=3	132	SCRRPRHLTTCVCALTWALCLLLHLLLSGAC
0.2	O43525	sp|O43525|KCNQ3_HUMAN Potassium voltage-gated channel subfamily KQT member 3 OS=Homo sapiens OX=9606 GN=KCNQ3 PE=1 SV=2	180	CCCRYKGWRGRLKFARKPLCMLDIFVLIASV
0.2	Q5VZ72	sp|Q5VZ72|IZUM3_HUMAN Izumo sperm-egg fusion protein 3 OS=Homo sapiens OX=9606 GN=IZUMO3 PE=3 SV=4	145	DCWTCLRMTNRCFKGEYCGDEDPRKAENREI
0.2	Q9Y278	sp|Q9Y278|HS3S2_HUMAN Heparan sulfate glucosamine 3-O-sulfotransferase 2 OS=Homo sapiens OX=9606 GN=HS3ST2 PE=1 SV=1	39	CCCDDLGRSRLLGAPRCLRGPSAGGQKLLQK
0.2	P0C617	sp|P0C617|O5AL1_HUMAN Olfactory receptor 5AL1 OS=Homo sapiens OX=9606 GN=OR5AL1 PE=3 SV=2	100	NFLCEVKSITFYACAIQVCCFITFVVCELYL
0.2	A6NI61	sp|A6NI61|MYMK_HUMAN Protein myomaker OS=Homo sapiens OX=9606 GN=MYMK PE=1 SV=1	201	KAGSPGTPAKLDCSTLCCACV
0.2	P47898	sp|P47898|5HT5A_HUMAN 5-hydroxytryptamine receptor 5A OS=Homo sapiens OX=9606 GN=HTR5A PE=2 SV=1	106	RWQLGRRLCQLWIACDVLCCTASIWNVTAIA
0.2	Q96G91	sp|Q96G91|P2Y11_HUMAN P2Y purinoceptor 11 OS=Homo sapiens OX=9606 GN=P2RY11 PE=2 SV=2	329	GCCCRHCPGYRDSWNPEDAKSTGQALPLNAT
0.2	P13591	sp|P13591|NCAM1_HUMAN Neural cell adhesion molecule 1 OS=Homo sapiens OX=9606 GN=NCAM1 PE=1 SV=3	741	ITCYFLNKCGLFMCIAVNLCGKAGPGAKGKD
0.2	P56696	sp|P56696|KCNQ4_HUMAN Potassium voltage-gated channel subfamily KQT member 4 OS=Homo sapiens OX=9606 GN=KCNQ4 PE=1 SV=2	156	CCCRYRGWQGRFRFARKPFCVIDFIVFVASV
0.2	Q86VI4	sp|Q86VI4|LAP4B_HUMAN Lysosomal-associated transmembrane protein 4B OS=Homo sapiens OX=9606 GN=LAPTM4B PE=1 SV=2	91	AMKMVAPWTRFYSNSCCLCCHVRTGTILLGV
0.2	P0C7N8	sp|P0C7N8|OR9G9_HUMAN Olfactory receptor 9G9 OS=Homo sapiens OX=9606 GN=OR9G9 PE=3 SV=1	93	FAGCLCQFFFSAGLAYSECCLLAAMAYDRYV
0.2	O15118	sp|O15118|NPC1_HUMAN NPC intracellular cholesterol transporter 1 OS=Homo sapiens OX=9606 GN=NPC1 PE=1 SV=2	232	DEVTAPCSCQDCSIVCGPKPQPPPPPAPWTI
0.2	Q8WZA6	sp|Q8WZA6|OR1E3_HUMAN Olfactory receptor 1E3 OS=Homo sapiens OX=9606 GN=OR1E3 PE=3 SV=2	122	CYVAICFPLHYTTIMSPKCCLGLLTLSWLLT
0.2	Q6ZSM3	sp|Q6ZSM3|MOT12_HUMAN Monocarboxylate transporter 12 OS=Homo sapiens OX=9606 GN=SLC16A12 PE=1 SV=3	253	SPYSSLTKEWAQTCLCCCLQQEYSFLLMSDF
0.2	Q15077	sp|Q15077|P2RY6_HUMAN P2Y purinoceptor 6 OS=Homo sapiens OX=9606 GN=P2RY6 PE=1 SV=1	207	ALLACYCLLACRLCRQDGPAEPVAQERRGKA
0.2	O43526	sp|O43526|KCNQ2_HUMAN Potassium voltage-gated channel subfamily KQT member 2 OS=Homo sapiens OX=9606 GN=KCNQ2 PE=1 SV=2	150	CCCRYRGWRGRLKFARKPFCVIDIMVLIASI
0.2	O15394	sp|O15394|NCAM2_HUMAN Neural cell adhesion molecule 2 OS=Homo sapiens OX=9606 GN=NCAM2 PE=1 SV=2	721	VSCFFIRQCGLLMCITRRMCGKKSGSSGKSK
0.2	Q13444	sp|Q13444|ADA15_HUMAN Disintegrin and metalloproteinase domain-containing protein 15 OS=Homo sapiens OX=9606 GN=ADAM15 PE=1 SV=4	667	CDSNRHCYCEEGWAPPDCTTQLKATSSLTTG
0.2	Q8NGN3	sp|Q8NGN3|O10G4_HUMAN Olfactory receptor 10G4 OS=Homo sapiens OX=9606 GN=OR10G4 PE=1 SV=1	239	TCASHCIVVLCFFVPCVVIYLRPGSMDAMDG
0.2	Q8NGK3	sp|Q8NGK3|O52K2_HUMAN Olfactory receptor 52K2 OS=Homo sapiens OX=9606 GN=OR52K2 PE=2 SV=2	162	PFLLRCFHYCRGPVIAHCYCEHMAVVRLACG
0.2	Q92633	sp|Q92633|LPAR1_HUMAN Lysophosphatidic acid receptor 1 OS=Homo sapiens OX=9606 GN=LPAR1 PE=1 SV=3	268	IICWTPGLVLLLLDVCCPQCDVLAYEKFFLL
0.2	Q8NH93	sp|Q8NH93|OR1L3_HUMAN Olfactory receptor 1L3 OS=Homo sapiens OX=9606 GN=OR1L3 PE=1 SV=1	122	RCVAICNPFHYVTVMNRRCCVLLLAFPITFS
0.2	Q71RS6	sp|Q71RS6|NCKX5_HUMAN Sodium/potassium/calcium exchanger 5 OS=Homo sapiens OX=9606 GN=SLC24A5 PE=1 SV=1	216	FDIKINQYIIKKCSPCCACLAKAMERSEQQP
0.2	Q6NUT3	sp|Q6NUT3|MFS12_HUMAN Major facilitator superfamily domain-containing protein 12 OS=Homo sapiens OX=9606 GN=MFSD12 PE=1 SV=2	423	IQSLHPCPSELCCRACVSFYHWAMVAVTGGV
0.2	Q9Y6C5	sp|Q9Y6C5|PTC2_HUMAN Protein patched homolog 2 OS=Homo sapiens OX=9606 GN=PTCH2 PE=1 SV=2	553	DLRRRHCQRLDVLCCFSSPCSAQVIQILPQE
0.2	Q15012	sp|Q15012|LAP4A_HUMAN Lysosomal-associated transmembrane protein 4A OS=Homo sapiens OX=9606 GN=LAPTM4A PE=1 SV=1	4	MSFKRNRSDRFYSTRCCGCCHVRTGTIILGT
0.2	Q96A29	sp|Q96A29|FUCT1_HUMAN GDP-fucose transporter 1 OS=Homo sapiens OX=9606 GN=SLC35C1 PE=1 SV=1	81	CLVTTLLCKGLSALAACCPGAVDFPSLRLDL
0.2	Q99928	sp|Q99928|GBRG3_HUMAN Gamma-aminobutyric acid receptor subunit gamma-3 OS=Homo sapiens OX=9606 GN=GABRG3 PE=2 SV=2	414	CQSFFCCYEECKSGSWRKGRIHIDILELDSY
0.2	P32239	sp|P32239|GASR_HUMAN Gastrin/cholecystokinin type B receptor OS=Homo sapiens OX=9606 GN=CCKBR PE=1 SV=1	394	HRRFRQACLETCARCCPRPPRARPRALPDED
0.2	Q13491	sp|Q13491|GPM6B_HUMAN Neuronal membrane glycoprotein M6-b OS=Homo sapiens OX=9606 GN=GPM6B PE=1 SV=2	10	EENTEQSQERKGCFECCIKCLGGVPYASLVA
0.2	P21728	sp|P21728|DRD1_HUMAN D(1A) dopamine receptor OS=Homo sapiens OX=9606 GN=DRD1 PE=1 SV=1	283	CCWLPFFILNCILPFCGSGETQPFCIDSNTF
0.2	P08908	sp|P08908|5HT1A_HUMAN 5-hydroxytryptamine receptor 1A OS=Homo sapiens OX=9606 GN=HTR1A PE=1 SV=3	109	CDLFIALDVLCCTSSILHLCAIALDRYWAIT
0.2	P28566	sp|P28566|5HT1E_HUMAN 5-hydroxytryptamine receptor 1E OS=Homo sapiens OX=9606 GN=HTR1E PE=1 SV=1	89	KLGYFLCEVWLSVDMTCCTCSILHLCVIALD
0.2	Q14439	sp|Q14439|GP176_HUMAN G-protein coupled receptor 176 OS=Homo sapiens OX=9606 GN=GPR176 PE=2 SV=1	89	CASLVCVPFDIILSTSPHCCWWIYTMLFCKV
0.2	Q9HBW0	sp|Q9HBW0|LPAR2_HUMAN Lysophosphatidic acid receptor 2 OS=Homo sapiens OX=9606 GN=LPAR2 PE=1 SV=2	297	CRDAEMRRTFRRLLCCACLRQSTRESVHYTS
0.2	P49685	sp|P49685|GPR15_HUMAN G-protein coupled receptor 15 OS=Homo sapiens OX=9606 GN=GPR15 PE=2 SV=1	213	TCYCCIARKLCAHYQQSGKHNKKLKKSIKII
0.2	Q5VV43	sp|Q5VV43|K0319_HUMAN Dyslexia-associated protein KIAA0319 OS=Homo sapiens OX=9606 GN=KIAA0319 PE=1 SV=1	976	LCICCCKRQKRTKIRKKTKYTILDNMDEQER
0.2	Q96LR9	sp|Q96LR9|APLD1_HUMAN Apolipoprotein L domain-containing protein 1 OS=Homo sapiens OX=9606 GN=APOLD1 PE=2 SV=2	167	SCLEFFCRWQGCGDRQLLQCGRNASIALYNS
0.2	Q9UKQ2	sp|Q9UKQ2|ADA28_HUMAN Disintegrin and metalloproteinase domain-containing protein 28 OS=Homo sapiens OX=9606 GN=ADAM28 PE=1 SV=3	637	AVCDHELQCQCEEGWIPPDCDDSSVVFHFSI
0.2	Q9BYT9	sp|Q9BYT9|ANO3_HUMAN Anoctamin-3 OS=Homo sapiens OX=9606 GN=ANO3 PE=1 SV=2	430	SQEICKATEVFMCPLCDKNCSLQRLNDSCIY
0.2	P62952	sp|P62952|BLCAP_HUMAN Bladder cancer-associated protein OS=Homo sapiens OX=9606 GN=BLCAP PE=1 SV=1	42	PCTICALVFLAALFLICYSCWGNCFLYHCSD
0.2	P08962	sp|P08962|CD63_HUMAN CD63 antigen OS=Homo sapiens OX=9606 GN=CD63 PE=1 SV=2	72	CCGACKENYCLMITFAIFLSLIMLVEVAAAI
0.2	Q9NUN7	sp|Q9NUN7|ACER3_HUMAN Alkaline ceramidase 3 OS=Homo sapiens OX=9606 GN=ACER3 PE=1 SV=3	91	LDELPMIYSCCIFVYCMFECFKIKNSVNYHL
0.2	Q9Y6A1	sp|Q9Y6A1|POMT1_HUMAN Protein O-mannosyl-transferase 1 OS=Homo sapiens OX=9606 GN=POMT1 PE=1 SV=3	239	QCCMRPACMGQMQMSQGVCVFCHLLARAVAL
0.2	Q15761	sp|Q15761|NPY5R_HUMAN Neuropeptide Y receptor type 5 OS=Homo sapiens OX=9606 GN=NPY5R PE=2 SV=2	400	NRHFKLVYCICHLLGMMSCCLNPILYGFLNN
0.2	Q9NP84	sp|Q9NP84|TNR12_HUMAN Tumor necrosis factor receptor superfamily member 12A OS=Homo sapiens OX=9606 GN=TNFRSF12A PE=1 SV=1	51	DCASCRARPHSDFCLGCAAAPPAPFRLLWPI
0.2	Q8N6K0	sp|Q8N6K0|TEX29_HUMAN Testis-expressed protein 29 OS=Homo sapiens OX=9606 GN=TEX29 PE=1 SV=1	27	DICDYNVSRDRCQELGCCFYEGVCYKKAVPI
0.2	Q3KNT9	sp|Q3KNT9|TMM95_HUMAN Sperm-egg fusion protein TMEM95 OS=Homo sapiens OX=9606 GN=TMEM95 PE=1 SV=1	116	YNCSTCKGTEVSCWPRKRCFPGSQDLWEAKI
0.2	Q3KNS1	sp|Q3KNS1|PTHD3_HUMAN Patched domain-containing protein 3 OS=Homo sapiens OX=9606 GN=PTCHD3 PE=1 SV=3	514	CFCIYTGMTLLFCYFYNITCFGAFMALDGKR
0.2	Q6ZVX9	sp|Q6ZVX9|PAQR9_HUMAN Membrane progestin receptor epsilon OS=Homo sapiens OX=9606 GN=PAQR9 PE=1 SV=1	217	AFVLAVACTVACCKSRTDWCTYPFALRTFVF
0.2	P31639	sp|P31639|SC5A2_HUMAN Sodium/glucose cotransporter 2 OS=Homo sapiens OX=9606 GN=SLC5A2 PE=1 SV=1	342	EVACVVPEVCRRVCGTEVGCSNIAYPRLVVK
0.2	Q96CC6	sp|Q96CC6|RHDF1_HUMAN Inactive rhomboid protein 1 OS=Homo sapiens OX=9606 GN=RHBDF1 PE=1 SV=2	826	PVRCEWCEFLTCIPFTDKFCEKYELDAQLH
0.2	Q9ULC8	sp|Q9ULC8|ZDHC8_HUMAN Palmitoyltransferase ZDHHC8 OS=Homo sapiens OX=9606 GN=ZDHHC8 PE=1 SV=3	119	HCSVCDNCVEDFDHHCPWVNNCIGRRNYRYF
0.2	O95857	sp|O95857|TSN13_HUMAN Tetraspanin-13 OS=Homo sapiens OX=9606 GN=TSPAN13 PE=2 SV=1	1	MVCGGFACSKNCLCALNLLYTLVSLLLIGIA
0.2	O95180	sp|O95180|CAC1H_HUMAN Voltage-dependent T-type calcium channel subunit alpha-1H OS=Homo sapiens OX=9606 GN=CACNA1H PE=1 SV=4	114	CVTLGMFRPCEDVECGSERCNILEAFDAFIF
0.2	P29274	sp|P29274|AA2AR_HUMAN Adenosine receptor A2a OS=Homo sapiens OX=9606 GN=ADORA2A PE=1 SV=2	66	ISTGFCAACHGCLFIACFVLVLTQSSIFSLL
0.2	P35414	sp|P35414|APJ_HUMAN Apelin receptor OS=Homo sapiens OX=9606 GN=APLNR PE=1 SV=1	312	FDPRFRQACTSMLCCGQSRCAGTSHSSSGEK
0.2	O43497	sp|O43497|CAC1G_HUMAN Voltage-dependent T-type calcium channel subunit alpha-1G OS=Homo sapiens OX=9606 GN=CACNA1G PE=1 SV=3	95	CVTLGMFRPCEDIACDSQRCRILQAFDDFIF
0.2	P51828	sp|P51828|ADCY7_HUMAN Adenylate cyclase type 7 OS=Homo sapiens OX=9606 GN=ADCY7 PE=1 SV=1	639	CFATKFSRCCPARGTLCTISERVETQPLLRL
0.2	F5H4A9	sp|F5H4A9|CC080_HUMAN Uncharacterized membrane protein C3orf80 OS=Homo sapiens OX=9606 GN=C3orf80 PE=2 SV=1	52	CCDATNATAVRCCKLPLHAFLDNVGWFVRKL
0.2	Q32M45	sp|Q32M45|ANO4_HUMAN Anoctamin-4 OS=Homo sapiens OX=9606 GN=ANO4 PE=2 SV=1	395	IMCPVCDKYCPFMRLSDSCVYAKVTHLFDNG
0.2	Q9BZ11	sp|Q9BZ11|ADA33_HUMAN Disintegrin and metalloproteinase domain-containing protein 33 OS=Homo sapiens OX=9606 GN=ADAM33 PE=1 SV=2	722	WCCYRLPGAHLQRCSWGCRRDPACSGPKDGP
0.2	P30939	sp|P30939|5HT1F_HUMAN 5-hydroxytryptamine receptor 1F OS=Homo sapiens OX=9606 GN=HTR1F PE=2 SV=1	90	IMGQVVCDIWLSVDITCCTCSILHLSAIALD
0.2	Q16581	sp|Q16581|C3AR_HUMAN C3a anaphylatoxin chemotactic receptor OS=Homo sapiens OX=9606 GN=C3AR1 PE=1 SV=2	126	KPIWCQNHRNVGMACSICGCIWVVAFVMCIP
0.2	Q75V66	sp|Q75V66|ANO5_HUMAN Anoctamin-5 OS=Homo sapiens OX=9606 GN=ANO5 PE=1 SV=1	351	IMCPLCDQVCDYWRLNSTCLASKFSHLFDNE
0.15	Q6ZN44	sp|Q6ZN44|UNC5A_HUMAN Netrin receptor UNC5A OS=Homo sapiens OX=9606 GN=UNC5A PE=1 SV=3	277	ECQGTDLDTRNCTSDLCVHTASGPEDVALYV
0.15	Q9UKZ4	sp|Q9UKZ4|TEN1_HUMAN Teneurin-1 OS=Homo sapiens OX=9606 GN=TENM1 PE=1 SV=2	299	TFSRPAFTFNKPYRCCNWKCTALSATAITVT
0.15	Q8TC36	sp|Q8TC36|SUN5_HUMAN SUN domain-containing protein 5 OS=Homo sapiens OX=9606 GN=SUN5 PE=1 SV=1	76	FACSLRTQAQQVLFNTCRCKLLCQKLMEKTG
0.15	Q8WWF3	sp|Q8WWF3|SSMM1_HUMAN Serine-rich single-pass membrane protein 1 OS=Homo sapiens OX=9606 GN=SSMEM1 PE=1 SV=1	16	IPVNCAIPNQDYECWKDDSCGTIGSFLLWYF
0.15	Q8WWF5	sp|Q8WWF5|ZNRF4_HUMAN E3 ubiquitin-protein ligase ZNRF4 OS=Homo sapiens OX=9606 GN=ZNRF4 PE=1 SV=3	275	LWLWAQACCSHRRPVKTSTCQKAQVRTFTWH
0.15	Q9H8X9	sp|Q9H8X9|ZDH11_HUMAN Palmitoyltransferase ZDHHC11 OS=Homo sapiens OX=9606 GN=ZDHHC11 PE=1 SV=1	147	CVSGFDHHCKWINNCVGSRNYWFFFSTVASA
0.15	Q8NFK1	sp|Q8NFK1|CXG3_HUMAN Gap junction gamma-3 protein OS=Homo sapiens OX=9606 GN=GJC3 PE=1 SV=1	45	GDEQSEFVCHTQQPGCKAACFDAFHPLSPLR
0.15	Q14028	sp|Q14028|CNGB1_HUMAN Cyclic nucleotide-gated cation channel beta-1 OS=Homo sapiens OX=9606 GN=CNGB1 PE=1 SV=2	627	CDMLCCKFKHRPWKKYQFPQSIDPLTNLMYV
0.15	P51681	sp|P51681|CCR5_HUMAN C-C chemokine receptor type 5 OS=Homo sapiens OX=9606 GN=CCR5 PE=1 SV=1	305	RNYLLVFFQKHIAKRFCKCCSIFQQEAPERA
0.15	O94910	sp|O94910|AGRL1_HUMAN Adhesion G protein-coupled receptor L1 OS=Homo sapiens OX=9606 GN=ADGRL1 PE=1 SV=1	864	TWVGIVISLVCLAICISTFCFLRGLQTDRNT
0.15	Q00975	sp|Q00975|CAC1B_HUMAN Voltage-dependent N-type calcium channel subunit alpha-1B OS=Homo sapiens OX=9606 GN=CACNA1B PE=1 SV=1	1660	IMLSCLSNQACDEQANATECGSDFAYFYFVS
0.15	Q8N144	sp|Q8N144|CXD3_HUMAN Gap junction delta-3 protein OS=Homo sapiens OX=9606 GN=GJD3 PE=1 SV=1	46	EDEQEEFVCNTLQPGCRQTCYDRAFPVSHYR
0.15	P55287	sp|P55287|CAD11_HUMAN Cadherin-11 OS=Homo sapiens OX=9606 GN=CDH11 PE=1 SV=2	588	LTIKVCGCDVNGALLSCNAEAYILNAGLSTG
0.15	P56817	sp|P56817|BACE1_HUMAN Beta-secretase 1 OS=Homo sapiens OX=9606 GN=BACE1 PE=1 SV=3	478	CQWRCLRCLRQQHDDFADDISLLK
0.15	P15514	sp|P15514|AREG_HUMAN Amphiregulin OS=Homo sapiens OX=9606 GN=AREG PE=1 SV=2	169	TCKCQQEYFGERCGEKSMKTHSMIDSSLSKI
0.15	P49682	sp|P49682|CXCR3_HUMAN C-X-C chemokine receptor type 3 OS=Homo sapiens OX=9606 GN=CXCR3 PE=1 SV=2	24	SSSYDYGENESDSCCTSPPCPQDFSLNFDRA
0.15	O00555	sp|O00555|CAC1A_HUMAN Voltage-dependent P/Q-type calcium channel subunit alpha-1A OS=Homo sapiens OX=9606 GN=CACNA1A PE=1 SV=3	1762	LSCLSGKPCDKNSGILTRECGNEFAYFYFVS
0.15	P12830	sp|P12830|CADH1_HUMAN Cadherin-1 OS=Homo sapiens OX=9606 GN=CDH1 PE=1 SV=3	680	TLEVSVCDCEGAAGVCRKAQPVEAGLQIPAI
0.15	Q2PZI1	sp|Q2PZI1|D19L1_HUMAN Probable C-mannosyltransferase DPY19L1 OS=Homo sapiens OX=9606 GN=DPY19L1 PE=2 SV=1	478	HMCVMASLICSRQLFGWLFCKVHPGAIVFAI
0.15	Q8IWK6	sp|Q8IWK6|AGRA3_HUMAN Adhesion G protein-coupled receptor A3 OS=Homo sapiens OX=9606 GN=ADGRA3 PE=1 SV=2	1045	HHCVNREDVRLAWIMTCCPGRSSYSVQVNVQ
0.15	P29033	sp|P29033|CXB2_HUMAN Gap junction beta-2 protein OS=Homo sapiens OX=9606 GN=GJB2 PE=1 SV=3	45	GDEQADFVCNTLQPGCKNVCYDHYFPISHIR
0.15	Q9Y5I7	sp|Q9Y5I7|CLD16_HUMAN Claudin-16 OS=Homo sapiens OX=9606 GN=CLDN16 PE=1 SV=1	44	QKTDTRHLSGARAGVCPCCHPDGLLATMRDL
0.15	P57739	sp|P57739|CLD2_HUMAN Claudin-2 OS=Homo sapiens OX=9606 GN=CLDN2 PE=1 SV=1	89	AISSLACIISVVGMRCTVFCQESRAKDRVAV
0.15	P60033	sp|P60033|CD81_HUMAN CD81 antigen OS=Homo sapiens OX=9606 GN=CD81 PE=1 SV=1	85	QESQCLLGTFFTCLVILFACEVAAGIWGFVN
0.15	Q08477	sp|Q08477|CP4F3_HUMAN Cytochrome P450 4F3 OS=Homo sapiens OX=9606 GN=CYP4F3 PE=1 SV=2	31	LARILAWTYTFYDNCCRLRCFPQPPKRNWFL
0.15	P82251	sp|P82251|BAT1_HUMAN b(0 +)-type amino acid transporter 1 OS=Homo sapiens OX=9606 GN=SLC7A9 PE=1 SV=1	125	FAIICLSFSEYVCAPFYVGCKPPQIVVKCLA
0.15	O60266	sp|O60266|ADCY3_HUMAN Adenylate cyclase type 3 OS=Homo sapiens OX=9606 GN=ADCY3 PE=1 SV=3	355	AAKYHQLRIKILGDCYYCICGLPDYREDHAV
0.15	P36382	sp|P36382|CXA5_HUMAN Gap junction alpha-5 protein OS=Homo sapiens OX=9606 GN=GJA5 PE=1 SV=3	46	GDEQADFRCDTIQPGCQNVCYDQAFPISHIR
0.15	O00501	sp|O00501|CLD5_HUMAN Claudin-5 OS=Homo sapiens OX=9606 GN=CLDN5 PE=1 SV=1	180	LLCCGAWVCTGRPDLSFPVKYSAPRRPTATG
0.15	Q9ULB5	sp|Q9ULB5|CADH7_HUMAN Cadherin-7 OS=Homo sapiens OX=9606 GN=CDH7 PE=2 SV=2	578	LTIRVCDCDADGVAQTCNAEAYVLPAGLSTG
0.15	O95377	sp|O95377|CXB5_HUMAN Gap junction beta-5 protein OS=Homo sapiens OX=9606 GN=GJB5 PE=1 SV=2	45	SDDHKDFDCNTRQPGCSNVCFDEFFPVSHVR
0.15	Q9HBB8	sp|Q9HBB8|CDHR5_HUMAN Cadherin-related family member 5 OS=Homo sapiens OX=9606 GN=CDHR5 PE=1 SV=3	690	VHKHYGPRLKCCCGKAPEPQPQGFDNQAFLP
0.15	P21926	sp|P21926|CD9_HUMAN CD9 antigen OS=Homo sapiens OX=9606 GN=CD9 PE=1 SV=4	76	LGCCGAVQESQCMLGLFFGFLLVIFAIEIAA
0.15	P55291	sp|P55291|CAD15_HUMAN Cadherin-15 OS=Homo sapiens OX=9606 GN=CDH15 PE=1 SV=1	577	VTVCRCGKDGVCLPGAAALLAGGTGLSLGAL
0.15	Q13634	sp|Q13634|CAD18_HUMAN Cadherin-18 OS=Homo sapiens OX=9606 GN=CDH18 PE=2 SV=1	581	SSTLTIRVCACERDGRVRTCHAEAFLSSAGL
0.15	P35212	sp|P35212|CXA4_HUMAN Gap junction alpha-4 protein OS=Homo sapiens OX=9606 GN=GJA4 PE=1 SV=3	46	GDEQSDFECNTAQPGCTNVCYDQAFPISHIR
0.15	A0A1B0GVQ0	sp|A0A1B0GVQ0|SPAR_HUMAN Small regulatory polypeptide of amino acid response OS=Homo sapiens OX=9606 GN=SPAAR PE=1 SV=2	39	CCFSCDSRAQDPQGGPGRSFTVATFRQEASL
0.15	Q9HAW7	sp|Q9HAW7|UD17_HUMAN UDP-glucuronosyltransferase 1A7 OS=Homo sapiens OX=9606 GN=UGT1A7 PE=1 SV=2	504	FKCCAYGYRKCLGKKGRVKKAHKSKTH
0.15	A6NDV4	sp|A6NDV4|TMM8B_HUMAN Transmembrane protein 8B OS=Homo sapiens OX=9606 GN=TMEM8B PE=1 SV=2	204	YLYAACECKAGWRGWGCTDSADALTYGFQLL
0.15	Q9NYK1	sp|Q9NYK1|TLR7_HUMAN Toll-like receptor 7 OS=Homo sapiens OX=9606 GN=TLR7 PE=1 SV=1	871	YHFCKAKIKGYQRLISPDCCYDAFIVYDTKD
0.15	Q03518	sp|Q03518|TAP1_HUMAN Antigen peptide transporter 1 OS=Homo sapiens OX=9606 GN=TAP1 PE=1 SV=2	55	DGVRVPMASSRCPAPRGCRCLPGASLAWLGT
0.15	Q8N8F6	sp|Q8N8F6|YIPF7_HUMAN Protein YIPF7 OS=Homo sapiens OX=9606 GN=YIPF7 PE=1 SV=2	201	GCVASVLGYCLLPMVILSGCAMFFSLQGIFG
0.15	Q02223	sp|Q02223|TNR17_HUMAN Tumor necrosis factor receptor superfamily member 17 OS=Homo sapiens OX=9606 GN=TNFRSF17 PE=1 SV=2	25	QLRCSSNTPPLTCQRYCNASVTNSVKGTNAI
0.15	Q6XR72	sp|Q6XR72|ZNT10_HUMAN Zinc transporter 10 OS=Homo sapiens OX=9606 GN=SLC30A10 PE=1 SV=2	134	FQDCAAWFACCLRGRSRRLQQRQQLAEGCVP
0.15	Q8N966	sp|Q8N966|ZDH22_HUMAN Palmitoyltransferase ZDHHC22 OS=Homo sapiens OX=9606 GN=ZDHHC22 PE=1 SV=2	78	ACQGASARKTPCPSPSTHFCRVCARVTLRHD
0.15	Q9H1Z9	sp|Q9H1Z9|TSN10_HUMAN Tetraspanin-10 OS=Homo sapiens OX=9606 GN=TSPAN10 PE=2 SV=1	129	LVVSAASLAGCLGALCENTCLLRGFSGGILA
0.15	O95859	sp|O95859|TSN12_HUMAN Tetraspanin-12 OS=Homo sapiens OX=9606 GN=TSPAN12 PE=1 SV=1	64	HPVMIAVCCFLIIVGMLGYCGTVKRNLLLLA
0.15	Q5VUD6	sp|Q5VUD6|DIK1B_HUMAN Divergent protein kinase domain 1B OS=Homo sapiens OX=9606 GN=DIPK1B PE=1 SV=3	51	SSYSERCRGHVCQVVICDQYRKGIISGSVCQ
0.15	O14493	sp|O14493|CLD4_HUMAN Claudin-4 OS=Homo sapiens OX=9606 GN=CLDN4 PE=1 SV=1	181	LCCNCPPRTDKPYSAKYSAARSAAASNYV
0.15	Q9HBW9	sp|Q9HBW9|AGRL4_HUMAN Adhesion G protein-coupled receptor L4 OS=Homo sapiens OX=9606 GN=ADGRL4 PE=1 SV=3	669	RKIQEEYYRLFKNVPCCFGCLR
0.15	P34972	sp|P34972|CNR2_HUMAN Cannabinoid receptor 2 OS=Homo sapiens OX=9606 GN=CNR2 PE=1 SV=1	172	WTCCPRPCSELFPLIPNDYLLSWLLFIAFLF
0.15	P06127	sp|P06127|CD5_HUMAN T-cell surface glycoprotein CD5 OS=Homo sapiens OX=9606 GN=CD5 PE=1 SV=2	348	SQCHELWERNSYCKKVFVTCQDPNPAGLAAG
0.15	P28907	sp|P28907|CD38_HUMAN ADP-ribosyl cyclase/cyclic ADP-ribose hydrolase 1 OS=Homo sapiens OX=9606 GN=CD38 PE=1 SV=2	1	MANCEFSPVSGDKPCCRLSRRAQLCLGVSIL
0.15	P21730	sp|P21730|C5AR1_HUMAN C5a anaphylatoxin chemotactic receptor 1 OS=Homo sapiens OX=9606 GN=C5AR1 PE=1 SV=2	275	FLLLKKLDSLCVSFAYINCCINPIIYVVAGQ
0.15	Q86V35	sp|Q86V35|CABP7_HUMAN Calcium-binding protein 7 OS=Homo sapiens OX=9606 GN=CABP7 PE=1 SV=1	165	AEECPVDVETCSNQQIRQTCVRKSLICAFAI
0.15	Q8IXH8	sp|Q8IXH8|CAD26_HUMAN Cadherin-like protein 26 OS=Homo sapiens OX=9606 GN=CDH26 PE=1 SV=4	585	SQKQTVHVRICPCASGLTCVELADAEVGLHV
0.15	O75309	sp|O75309|CAD16_HUMAN Cadherin-16 OS=Homo sapiens OX=9606 GN=CDH16 PE=2 SV=1	757	VRVIVCRCNVEGQCMRKVGRMKGMPTKLSAV
0.15	Q9H7F0	sp|Q9H7F0|AT133_HUMAN Probable cation-transporting ATPase 13A3 OS=Homo sapiens OX=9606 GN=ATP13A3 PE=1 SV=4	477	GIFCISPQRINICGQLNLVCFDKTGTLTEDG
0.15	P08913	sp|P08913|ADA2A_HUMAN Alpha-2A adrenergic receptor OS=Homo sapiens OX=9606 GN=ADRA2A PE=1 SV=4	121	CEIYLALDVLFCTSSIVHLCAISLDRYWSIT
0.15	Q9NRU3	sp|Q9NRU3|CNNM1_HUMAN Metal transporter CNNM1 OS=Homo sapiens OX=9606 GN=CNNM1 PE=1 SV=3	341	ICPYSVCSRHGLAIASHSVCLTRLLMAAAFP
0.15	Q9UHP7	sp|Q9UHP7|CLC2D_HUMAN C-type lectin domain family 2 member D OS=Homo sapiens OX=9606 GN=CLEC2D PE=1 SV=1	59	IRANCHQEPSVCLQAACPESWIGFQRKCFYF
0.15	P55286	sp|P55286|CADH8_HUMAN Cadherin-8 OS=Homo sapiens OX=9606 GN=CDH8 PE=2 SV=2	592	LTIRVCGCSNDGVVQSCNVEAYVLPIGLSMG
0.15	Q86Y34	sp|Q86Y34|AGRG3_HUMAN Adhesion G protein-coupled receptor G3 OS=Homo sapiens OX=9606 GN=ADGRG3 PE=1 SV=1	243	VCCCDHLTFFALLLRPTLDQSTVHILTRISQ
0.15	P51793	sp|P51793|CLCN4_HUMAN H(+)/Cl(-) exchange transporter 4 OS=Homo sapiens OX=9606 GN=CLCN4 PE=1 SV=2	110	SHEQCCWTSNETTFEDRDKCPLWQKWSELLV
0.15	Q8NDB6	sp|Q8NDB6|FA156_HUMAN Protein FAM156A/FAM156B OS=Homo sapiens OX=9606 GN=FAM156A PE=1 SV=1	124	FRCECRYCQSHRPNLSGIPGESNRAPHPSSW
0.15	Q9NX76	sp|Q9NX76|CKLF6_HUMAN CKLF-like MARVEL transmembrane domain-containing protein 6 OS=Homo sapiens OX=9606 GN=CMTM6 PE=1 SV=1	60	SQCTLCGGLYFFEFVSCSAFLLSLLILIVYC
0.15	Q9HAR2	sp|Q9HAR2|AGRL3_HUMAN Adhesion G protein-coupled receptor L3 OS=Homo sapiens OX=9606 GN=ADGRL3 PE=1 SV=2	872	ILLSLVCLLICIFTFCFFRGLQSDRNTIHKN
0.15	Q8NER5	sp|Q8NER5|ACV1C_HUMAN Activin receptor type-1C OS=Homo sapiens OX=9606 GN=ACVR1C PE=1 SV=1	84	TECCFTDFCNNITLHLPTASPNAPKLGPMEL
0.15	P50406	sp|P50406|5HT6R_HUMAN 5-hydroxytryptamine receptor 6 OS=Homo sapiens OX=9606 GN=HTR6 PE=1 SV=1	91	RWVLARGLCLLWTAFDVMCCSASILNLCLIS
0.15	Q02487	sp|Q02487|DSC2_HUMAN Desmocollin-2 OS=Homo sapiens OX=9606 GN=DSC2 PE=1 SV=1	665	DVTLCDCITENDCTHRVDPRIGGGGVQLGKW
0.15	Q9P2K9	sp|Q9P2K9|DISP3_HUMAN Protein dispatched homolog 3 OS=Homo sapiens OX=9606 GN=DISP3 PE=2 SV=2	616	WSLYLAPLESSCQTSCHQNCSRKTSLHFPGD
0.15	Q92523	sp|Q92523|CPT1B_HUMAN Carnitine O-palmitoyltransferase 1 muscle isoform OS=Homo sapiens OX=9606 GN=CPT1B PE=1 SV=2	73	SFCNVDISLGLVSCIQRCLPQGCGPYQTPQT
0.15	P55289	sp|P55289|CAD12_HUMAN Cadherin-12 OS=Homo sapiens OX=9606 GN=CDH12 PE=2 SV=2	582	TNTMTIRVCRCDSDGTILSCNVEAIFLPVGL
0.15	P13945	sp|P13945|ADRB3_HUMAN Beta-3 adrenergic receptor OS=Homo sapiens OX=9606 GN=ADRB3 PE=1 SV=3	178	WRVGADAEAQRCHSNPRCCAFASNMPYVLLS
0.15	O95452	sp|O95452|CXB6_HUMAN Gap junction beta-6 protein OS=Homo sapiens OX=9606 GN=GJB6 PE=1 SV=2	45	GDEQEDFVCNTLQPGCKNVCYDHFFPVSHIR
0.15	P51679	sp|P51679|CCR4_HUMAN C-C chemokine receptor type 4 OS=Homo sapiens OX=9606 GN=CCR4 PE=1 SV=1	313	KYILQLFKTCRGLFVLCQYCGLLQIYSADTP
0.15	P01732	sp|P01732|CD8A_HUMAN T-cell surface glycoprotein CD8 alpha chain OS=Homo sapiens OX=9606 GN=CD8A PE=1 SV=1	203	TLYCNHRNRRRVCKCPRPVVKSGDKPSLSAR
0.15	Q9Y6N8	sp|Q9Y6N8|CAD10_HUMAN Cadherin-10 OS=Homo sapiens OX=9606 GN=CDH10 PE=1 SV=2	584	IRVCACDSQGNMQSCSAEALLLPAGLSTGAL
0.15	Q6PL45	sp|Q6PL45|BRID5_HUMAN BRICHOS domain-containing protein 5 OS=Homo sapiens OX=9606 GN=BRICD5 PE=1 SV=3	5	SCCAERPKPGPTGVKTKPSCGGWRAVSLLLL
0.15	O60656	sp|O60656|UD19_HUMAN UDP-glucuronosyltransferase 1A9 OS=Homo sapiens OX=9606 GN=UGT1A9 PE=1 SV=1	504	FKCCAYGYRKCLGKKGRVKKAHKSKTH
0.15	A0A1B0GTI8	sp|A0A1B0GTI8|TM272_HUMAN Transmembrane protein 272 OS=Homo sapiens OX=9606 GN=TMEM272 PE=2 SV=3	2	PGGLEKTCHQCISKIASNACFVVVLCAFLAL
0.15	P59534	sp|P59534|T2R39_HUMAN Taste receptor type 2 member 39 OS=Homo sapiens OX=9606 GN=TAS2R39 PE=2 SV=3	176	CINICTVYCNNSFPIHSSNSTKKTYLSEINV
0.15	Q8WUM9	sp|Q8WUM9|S20A1_HUMAN Sodium-dependent phosphate transporter 1 OS=Homo sapiens OX=9606 GN=SLC20A1 PE=1 SV=1	232	ILISVGCAVFCALIVWFFVCPRMKRKIEREI
0.15	Q9HAW8	sp|Q9HAW8|UD110_HUMAN UDP-glucuronosyltransferase 1A10 OS=Homo sapiens OX=9606 GN=UGT1A10 PE=1 SV=1	504	FKCCAYGYRKCLGKKGRVKKAHKSKTH
0.15	Q9NYW4	sp|Q9NYW4|TA2R5_HUMAN Taste receptor type 2 member 5 OS=Homo sapiens OX=9606 GN=TAS2R5 PE=1 SV=1	277	PRVKQTCQKILWKTVCARRCWGP
0.15	Q01118	sp|Q01118|SCN7A_HUMAN Sodium channel protein type 7 subunit alpha OS=Homo sapiens OX=9606 GN=SCN7A PE=1 SV=2	686	CGEWVETLWDCMEVAGQSWCIPFYLMVILIG
0.15	Q9BX95	sp|Q9BX95|SGPP1_HUMAN Sphingosine-1-phosphate phosphatase 1 OS=Homo sapiens OX=9606 GN=SGPP1 PE=1 SV=2	227	WQYPLIYGLILIPCWCSLVCLSRIYMGMHSI
0.15	P37288	sp|P37288|V1AR_HUMAN Vasopressin V1a receptor OS=Homo sapiens OX=9606 GN=AVPR1A PE=1 SV=1	351	FSGHLLQDCVQSFPCCQNMKEKFNKEDTDSM
0.15	Q86TG1	sp|Q86TG1|T150A_HUMAN Transmembrane protein 150A OS=Homo sapiens OX=9606 GN=TMEM150A PE=1 SV=1	50	EQGGPKTCCTLDDVPLISKCGSYPPESCLFS
0.15	Q9H2Y9	sp|Q9H2Y9|SO5A1_HUMAN Solute carrier organic anion transporter family member 5A1 OS=Homo sapiens OX=9606 GN=SLCO5A1 PE=2 SV=2	709	IDTTCMLWQQECGVQGSCWEYNVTSFRFVYF
0.15	P31641	sp|P31641|SC6A6_HUMAN Sodium- and chloride-dependent taurine transporter OS=Homo sapiens OX=9606 GN=SLC6A6 PE=1 SV=2	215	SLKWDLALCLLLVWLVCFFCIWKGVRSTGKV
0.15	P30518	sp|P30518|V2R_HUMAN Vasopressin V2 receptor OS=Homo sapiens OX=9606 GN=AVPR2 PE=1 SV=1	339	LLCCARGRTPPSLGPQDESCTTASSSLAKDT
0.15	Q86WA9	sp|Q86WA9|S2611_HUMAN Sodium-independent sulfate anion transporter OS=Homo sapiens OX=9606 GN=SLC26A11 PE=1 SV=2	22	ACCCSPAALQRRLPILAWLPSYSLQWLKMDF
0.15	Q13621	sp|Q13621|S12A1_HUMAN Solute carrier family 12 member 1 OS=Homo sapiens OX=9606 GN=SLC12A1 PE=1 SV=2	455	CNGSAACGLGYDFSRCRHEPCQYGLMNNFQV
0.15	P35968	sp|P35968|VGFR2_HUMAN Vascular endothelial growth factor receptor 2 OS=Homo sapiens OX=9606 GN=KDR PE=1 SV=2	735	YTCQACSVLGCAKVEAFFIIEGAQEKTNLEI
0.15	Q8IU68	sp|Q8IU68|TMC8_HUMAN Transmembrane channel-like protein 8 OS=Homo sapiens OX=9606 GN=TMC8 PE=1 SV=1	397	LCIGRDKSSCESYGYNVCDYQCWENSVGEEL
0.15	P35346	sp|P35346|SSR5_HUMAN Somatostatin receptor type 5 OS=Homo sapiens OX=9606 GN=SSTR5 PE=1 SV=3	218	CLCYLLIVVKVRAAGVRVGCVRRRSERKVTR
0.15	Q96L08	sp|Q96L08|SUSD3_HUMAN Sushi domain-containing protein 3 OS=Homo sapiens OX=9606 GN=SUSD3 PE=1 SV=1	124	LTCCLLKCVKKSKRRRSNRSAQLWSQLKDED
0.15	Q8NCC5	sp|Q8NCC5|SPX3_HUMAN Sugar phosphate exchanger 3 OS=Homo sapiens OX=9606 GN=SLC37A3 PE=2 SV=2	142	WLYCCLWIVNGLLQSTGWPCVVAVMGNWFGK
0.15	P0C7U3	sp|P0C7U3|ZH11B_HUMAN Probable palmitoyltransferase ZDHHC11B OS=Homo sapiens OX=9606 GN=ZDHHC11B PE=3 SV=1	147	CVSGFDHHCKWINNCVGSRNYWFFFSTVASA
0.15	Q96SJ8	sp|Q96SJ8|TSN18_HUMAN Tetraspanin-18 OS=Homo sapiens OX=9606 GN=TSPAN18 PE=2 SV=1	70	FLGCCGAVRENKCLLLFFFLFILIIFLAELS
0.15	A6NC51	sp|A6NC51|T150B_HUMAN Modulator of macroautophagy TMEM150B OS=Homo sapiens OX=9606 GN=TMEM150B PE=2 SV=1	156	LGLCSVCTILIVAMIVLHACSLRSVSAACEW
0.15	Q8TCT7	sp|Q8TCT7|SPP2B_HUMAN Signal peptide peptidase-like 2B OS=Homo sapiens OX=9606 GN=SPPL2B PE=1 SV=2	251	VIGIFCLASATGLYSCLAPCVRRLPFGKCRI
0.15	P48764	sp|P48764|SL9A3_HUMAN Sodium/hydrogen exchanger 3 OS=Homo sapiens OX=9606 GN=SLC9A3 PE=1 SV=2	309	ILAITFCGICCQKYVKANISEQSATTVRYTM
0.15	Q9Y6L6	sp|Q9Y6L6|SO1B1_HUMAN Solute carrier organic anion transporter family member 1B1 OS=Homo sapiens OX=9606 GN=SLCO1B1 PE=1 SV=2	595	IDTTCIKWSTNNCGTRGSCRTYNSTSFSRVY
0.15	P19224	sp|P19224|UD16_HUMAN UDP-glucuronosyltransferase 1-6 OS=Homo sapiens OX=9606 GN=UGT1A6 PE=1 SV=2	506	FKCCAYGYRKCLGKKGRVKKAHKSKTH
0.15	Q8N6I4	sp|Q8N6I4|TM251_HUMAN Transmembrane protein 251 OS=Homo sapiens OX=9606 GN=TMEM251 PE=2 SV=4	118	LYSCTRADPKTVGYCIIPICLAVICNRHQAF
0.15	P36897	sp|P36897|TGFR1_HUMAN TGF-beta receptor type-1 OS=Homo sapiens OX=9606 GN=TGFBR1 PE=1 SV=1	97	TTYCCNQDHCNKIELPTTVKSSPGLGPVELA
0.15	Q8WVE6	sp|Q8WVE6|TM171_HUMAN Transmembrane protein 171 OS=Homo sapiens OX=9606 GN=TMEM171 PE=1 SV=3	47	CQYKPLPDCPMVLKVAGPACAVVGLGAVILA
0.15	Q695T7	sp|Q695T7|S6A19_HUMAN Sodium-dependent neutral amino acid transporter B(0)AT1 OS=Homo sapiens OX=9606 GN=SLC6A19 PE=1 SV=1	43	LTCLGFCVGLGNVWRFPYLCQSHGGGAFMIP
0.15	Q9Y666	sp|Q9Y666|S12A7_HUMAN Solute carrier family 12 member 7 OS=Homo sapiens OX=9606 GN=SLC12A7 PE=1 SV=3	144	IVGVAGVLESFLIVAMCCTCTMLTAISMSAI
0.15	Q9BY78	sp|Q9BY78|RNF26_HUMAN E3 ubiquitin-protein ligase RNF26 OS=Homo sapiens OX=9606 GN=RNF26 PE=1 SV=1	80	LQALCTLLYSCCSGLESLKLLGHLASHGALR
0.15	Q5GH76	sp|Q5GH76|XKR4_HUMAN XK-related protein 4 OS=Homo sapiens OX=9606 GN=XKR4 PE=2 SV=1	405	IVLHWCIMTFWIVHCETEFCITKWEEIVFDM
0.15	O15342	sp|O15342|VA0E1_HUMAN V-type proton ATPase subunit e 1 OS=Homo sapiens OX=9606 GN=ATP6V0E1 PE=1 SV=2	29	PKGPNRGVIITMLVTCSVCCYLFWLIAILAQ
0.15	P28908	sp|P28908|TNR8_HUMAN Tumor necrosis factor receptor superfamily member 8 OS=Homo sapiens OX=9606 GN=TNFRSF8 PE=1 SV=1	406	LCHRRACRKRIRQKLHLCYPVQTSQPKLELV
0.15	P0DP42	sp|P0DP42|T225B_HUMAN Transmembrane protein 225B OS=Homo sapiens OX=9606 GN=TMEM225B PE=1 SV=1	167	ICLIQEMVCPCWHLLSTSQSMEEDHGSLYLD
0.15	Q8TCT8	sp|Q8TCT8|SPP2A_HUMAN Signal peptide peptidase-like 2A OS=Homo sapiens OX=9606 GN=SPPL2A PE=1 SV=2	261	YNCLAALIHKIPYGQCTIACRGKNMEVRLIF
0.15	Q96JT2	sp|Q96JT2|S45A3_HUMAN Solute carrier family 45 member 3 OS=Homo sapiens OX=9606 GN=SLC45A3 PE=2 SV=1	225	PTEPAEGLSAPSLSPHCCPCRARLAFRNLGA
0.15	Q9Y493	sp|Q9Y493|ZAN_HUMAN Zonadhesin OS=Homo sapiens OX=9606 GN=ZAN PE=2 SV=5	2728	ATFTCECEVGYGGGLCMEPRDAPPPRKPASN
0.15	Q15035	sp|Q15035|TRAM2_HUMAN Translocating chain-associated membrane protein 2 OS=Homo sapiens OX=9606 GN=TRAM2 PE=1 SV=1	281	PEKGNFNTLFCRLCVLLLVCAAQAWLMWRFI
0.15	P48065	sp|P48065|S6A12_HUMAN Sodium- and chloride-dependent betaine transporter OS=Homo sapiens OX=9606 GN=SLC6A12 PE=1 SV=2	208	SLRWELALCLLLAWVICYFCIWKGVKSTGKV
0.15	Q96KT7	sp|Q96KT7|S35G5_HUMAN Solute carrier family 35 member G5 OS=Homo sapiens OX=9606 GN=SLC35G5 PE=1 SV=1	98	PDIRGWACFCALLNVLSIGCAYSAVQVVPAG
0.15	Q99884	sp|Q99884|SC6A7_HUMAN Sodium-dependent proline transporter OS=Homo sapiens OX=9606 GN=SLC6A7 PE=2 SV=2	212	EIRWNLCLCLLLAWVIVFLCILKGVKSSGKV
0.15	Q6PP77	sp|Q6PP77|XKR2_HUMAN XK-related protein 2 OS=Homo sapiens OX=9606 GN=XKRX PE=2 SV=2	406	HPLRSLFTHNVVDYLHCVCCHQHPRTRVENS
0.15	P35916	sp|P35916|VGFR3_HUMAN Vascular endothelial growth factor receptor 3 OS=Homo sapiens OX=9606 GN=FLT4 PE=1 SV=3	746	YLCSVCNAKGCVNSSASVAVEGSEDKGSMEI
0.15	Q6ZMB5	sp|Q6ZMB5|T184A_HUMAN Transmembrane protein 184A OS=Homo sapiens OX=9606 GN=TMEM184A PE=1 SV=1	150	MAEIRGKPIKSSCLYGTCCLRGMTYSIGFLR
0.15	Q8IUH8	sp|Q8IUH8|SPP2C_HUMAN Signal peptide peptidase-like 2C OS=Homo sapiens OX=9606 GN=SPPL2C PE=1 SV=3	460	CRFDVQVCSRQIYFVACTVAYAVGLLVTFMA
0.15	Q6PIS1	sp|Q6PIS1|S23A3_HUMAN Solute carrier family 23 member 3 OS=Homo sapiens OX=9606 GN=SLC23A3 PE=2 SV=2	232	VCSQHLGSCQFHVCPWRRASTSSTHTPLPVF
0.15	Q7LBE3	sp|Q7LBE3|S26A9_HUMAN Solute carrier family 26 member 9 OS=Homo sapiens OX=9606 GN=SLC26A9 PE=1 SV=1	370	IALGCSNFFGSFFKIHVICCALSVTLAVDGA
0.15	Q96QS1	sp|Q96QS1|TSN32_HUMAN Tetraspanin-32 OS=Homo sapiens OX=9606 GN=TSPAN32 PE=2 SV=1	223	IRCGCSLDRKGKYTLTPRACGRQPQEPSLLR
0.15	Q69YW2	sp|Q69YW2|STUM_HUMAN Protein stum homolog OS=Homo sapiens OX=9606 GN=STUM PE=1 SV=1	72	SAFTVLCGARTDLPDRHVCCVFWLNIAAALI
0.15	A0PJX4	sp|A0PJX4|SHSA3_HUMAN Protein shisa-3 homolog OS=Homo sapiens OX=9606 GN=SHISA3 PE=1 SV=1	119	YCCTCLRPKEPSQQPIRFSLRSYQTETLPMI
0.15	Q9H2J7	sp|Q9H2J7|S6A15_HUMAN Sodium-dependent neutral amino acid transporter B(0)AT2 OS=Homo sapiens OX=9606 GN=SLC6A15 PE=1 SV=1	500	ICCLLAFCIGLIFVQRSGNYFVTMFDDYSAT
0.15	Q92911	sp|Q92911|SC5A5_HUMAN Sodium/iodide cotransporter OS=Homo sapiens OX=9606 GN=SLC5A5 PE=1 SV=1	297	ACCGIVMFVFYTDCDPLLLGRISAPDQYMPL
0.15	P51811	sp|P51811|XK_HUMAN Membrane transport protein XK OS=Homo sapiens OX=9606 GN=XK PE=1 SV=5	380	FSSSVSEGFQRWLRCFCWACRQQKPCEPIGK
0.15	Q9UKR8	sp|Q9UKR8|TSN16_HUMAN Tetraspanin-16 OS=Homo sapiens OX=9606 GN=TSPAN16 PE=2 SV=1	58	GNLCLVMGCITVLLGCAGWYGATKESRGTLL
0.15	Q86UF1	sp|Q86UF1|TSN33_HUMAN Tetraspanin-33 OS=Homo sapiens OX=9606 GN=TSPAN33 PE=1 SV=1	73	VLMFLLTFCGCIGSLRENICLLQTFSLCLTA
0.15	Q8N808	sp|Q8N808|S35G3_HUMAN Solute carrier family 35 member G3 OS=Homo sapiens OX=9606 GN=SLC35G3 PE=2 SV=1	141	CSAVLTLCLESQGLSGYDWCGLLGCILGLII
0.15	P48165	sp|P48165|CXA8_HUMAN Gap junction alpha-8 protein OS=Homo sapiens OX=9606 GN=GJA8 PE=1 SV=3	46	GDEQSDFVCNTQQPGCENVCYDEAFPISHIR
0.15	Q5QFB9	sp|Q5QFB9|PAPAS_HUMAN Protein PAPPAS OS=Homo sapiens OX=9606 GN=PAPPA-AS1 PE=5 SV=1	33	WYKSHKLSQHCIRICGHLCQKHLDMFLSVIG
0.15	P35504	sp|P35504|UD15_HUMAN UDP-glucuronosyltransferase 1A5 OS=Homo sapiens OX=9606 GN=UGT1A5 PE=1 SV=1	508	FKCCAYGYRKCLGKKGRVKKAHKSKTH
0.15	Q86W33	sp|Q86W33|TPRA1_HUMAN Transmembrane protein adipocyte-associated 1 OS=Homo sapiens OX=9606 GN=TPRA1 PE=1 SV=1	240	LLQGLGSVLLCFDIIEGLCCVDATTFLYFSF
0.15	A2RUT3	sp|A2RUT3|TMM89_HUMAN Transmembrane protein 89 OS=Homo sapiens OX=9606 GN=TMEM89 PE=2 SV=1	35	LQPWGCQPKSVEGCRGGLSCPGYWLGPGASR
0.15	Q9BZD6	sp|Q9BZD6|TMG4_HUMAN Transmembrane gamma-carboxyglutamic acid protein 4 OS=Homo sapiens OX=9606 GN=PRRG4 PE=1 SV=1	134	LGYYLCITKCNRLQHPCSSAVYERGRHTPSI
0.15	Q9NR96	sp|Q9NR96|TLR9_HUMAN Toll-like receptor 9 OS=Homo sapiens OX=9606 GN=TLR9 PE=1 SV=2	839	CGWDLWYCFHLCLAWLPWRGRQSGRDEDALP
0.15	Q9H061	sp|Q9H061|T126A_HUMAN Transmembrane protein 126A OS=Homo sapiens OX=9606 GN=TMEM126A PE=1 SV=1	82	TYRCFVSFPLNTGDLDCETCTITRSGLTGLV
0.15	Q9HBX9	sp|Q9HBX9|RXFP1_HUMAN Relaxin receptor 1 OS=Homo sapiens OX=9606 GN=RXFP1 PE=1 SV=2	433	IRSENKLYAMSIISLCCADCLMGIYLFVIGG
0.15	Q86YT5	sp|Q86YT5|S13A5_HUMAN Solute carrier family 13 member 5 OS=Homo sapiens OX=9606 GN=SLC13A5 PE=1 SV=1	194	GQQEDQERKRLCKAMTLCICYAASIGGTATL
0.15	O95185	sp|O95185|UNC5C_HUMAN Netrin receptor UNC5C OS=Homo sapiens OX=9606 GN=UNC5C PE=1 SV=2	351	DCDGLVLQSKNCTDGLCMQTAPDSDDVALYV
0.15	A0PJX8	sp|A0PJX8|TMM82_HUMAN Transmembrane protein 82 OS=Homo sapiens OX=9606 GN=TMEM82 PE=2 SV=2	118	AERLQLYLLCQYSLGCGLTCGLSFLQEGAPH
0.15	Q16572	sp|Q16572|VACHT_HUMAN Vesicular acetylcholine transporter OS=Homo sapiens OX=9606 GN=SLC18A3 PE=1 SV=2	377	CRSFAPLVVSLCGLCFGIALVDTALLPTLAF
0.15	Q8N434	sp|Q8N434|SVOPL_HUMAN Putative transporter SVOPL OS=Homo sapiens OX=9606 GN=SVOPL PE=1 SV=2	453	LMSASILGALCLFSSVCVVCAISAFTLPIET
0.15	Q6ZQN7	sp|Q6ZQN7|SO4C1_HUMAN Solute carrier organic anion transporter family member 4C1 OS=Homo sapiens OX=9606 GN=SLCO4C1 PE=1 SV=1	638	IDSTCILWDINDCGIKGACWIYDNIKMAHML
0.15	Q9NYR8	sp|Q9NYR8|RDH8_HUMAN Retinol dehydrogenase 8 OS=Homo sapiens OX=9606 GN=RDH8 PE=1 SV=1	60	LTVAQLDVCSDESVAQCLSCIQGEVDVLVNN
0.15	Q8TBP6	sp|Q8TBP6|S2540_HUMAN Solute carrier family 25 member 40 OS=Homo sapiens OX=9606 GN=SLC25A40 PE=1 SV=1	50	LPKGKCFVYSNGLMDHLCVCEEGGNKLWYKK
0.15	Q9UN75	sp|Q9UN75|PCDAC_HUMAN Protocadherin alpha-12 OS=Homo sapiens OX=9606 GN=PCDHA12 PE=2 SV=1	722	RCSAPPTVSRCAPGKPTLVCSSAVGSWSYSQ
0.15	Q9Y5H8	sp|Q9Y5H8|PCDA3_HUMAN Protocadherin alpha-3 OS=Homo sapiens OX=9606 GN=PCDHA3 PE=2 SV=1	722	RCSAPPTEGDCGPGKPTLVCSSAVGSWSYSQ
0.15	Q5U3C3	sp|Q5U3C3|TM164_HUMAN Transmembrane protein 164 OS=Homo sapiens OX=9606 GN=TMEM164 PE=2 SV=1	120	LNPCHLVTMMHIFLLACPPCRGAIVVFKLQM
0.15	Q5TAH2	sp|Q5TAH2|SL9C2_HUMAN Sodium/hydrogen exchanger 11 OS=Homo sapiens OX=9606 GN=SLC9C2 PE=2 SV=1	33	TLVCFIVVLGGLLKMCLKNCEVIVLTILSLS
0.15	Q14D33	sp|Q14D33|RTP5_HUMAN Receptor-transporting protein 5 OS=Homo sapiens OX=9606 GN=RTP5 PE=1 SV=2	514	FHKARCGCRREEDERPGRACRRPHAEPYEDF
0.15	Q5T4D3	sp|Q5T4D3|TMTC4_HUMAN Protein O-mannosyl-transferase TMTC4 OS=Homo sapiens OX=9606 GN=TMTC4 PE=1 SV=2	325	NAWLLLCPWWLCFDWSMGCIPLIKSISDWRV
0.15	Q8TEQ8	sp|Q8TEQ8|PIGO_HUMAN GPI ethanolamine phosphate transferase 3 OS=Homo sapiens OX=9606 GN=PIGO PE=1 SV=3	461	SCFICLLASQWAISPGFPFCPLLLTPVAWGL
0.15	A6NKB5	sp|A6NKB5|PCX2_HUMAN Pecanex-like protein 2 OS=Homo sapiens OX=9606 GN=PCNX2 PE=1 SV=3	864	FCKDMWVLLFCLVMASCQYSLLKSVQPDPAS
0.15	Q15619	sp|Q15619|OR1C1_HUMAN Olfactory receptor 1C1 OS=Homo sapiens OX=9606 GN=OR1C1 PE=2 SV=4	122	RYVAICHPLHYTARMNLCLCVQLVAGLWLVT
0.15	Q9GZP7	sp|Q9GZP7|VN1R1_HUMAN Vomeronasal type-1 receptor 1 OS=Homo sapiens OX=9606 GN=VN1R1 PE=2 SV=1	153	SICRWMEIKIRSPRFIDFCCLLCWAPHVLMN
0.15	Q12767	sp|Q12767|TMM94_HUMAN Transmembrane protein 94 OS=Homo sapiens OX=9606 GN=TMEM94 PE=1 SV=1	1092	CFLFLLQCQLTLVVIQFLSCLVQLPPLLSTT
0.15	Q8N9X5	sp|Q8N9X5|TMM75_HUMAN Putative transmembrane protein 75 OS=Homo sapiens OX=9606 GN=TMEM75 PE=5 SV=1	46	LSVCLICTRLLQEGIAQSKCLINVSFSLYSC
0.15	Q7Z404	sp|Q7Z404|TMC4_HUMAN Transmembrane channel-like protein 4 OS=Homo sapiens OX=9606 GN=TMC4 PE=1 SV=3	447	SLWNQITCGGDSEAEDCKTCGYNYKQLPCWE
0.15	G3V0H7	sp|G3V0H7|SO1B7_HUMAN Putative solute carrier organic anion transporter family member 1B7 OS=Homo sapiens OX=9606 GN=SLCO1B7 PE=5 SV=1	547	LIDTTCMKWSTNSCGARGACRIYNSTYLGRA
0.15	Q15858	sp|Q15858|SCN9A_HUMAN Sodium channel protein type 9 subunit alpha OS=Homo sapiens OX=9606 GN=SCN9A PE=1 SV=3	884	GMQLFGKSYKECVCKINDDCTLPRWHMNDFF
0.15	Q9H598	sp|Q9H598|VIAAT_HUMAN Vesicular inhibitory amino acid transporter OS=Homo sapiens OX=9606 GN=SLC32A1 PE=2 SV=2	154	FAAVVCCYTGKILIACLYEENEDGEVVRVRD
0.15	Q8IUR5	sp|Q8IUR5|TMTC1_HUMAN Protein O-mannosyl-transferase TMTC1 OS=Homo sapiens OX=9606 GN=TMTC1 PE=1 SV=3	419	GYCILFVHGLSKLCTWLNRCGATTLIVSTVL
0.15	P16662	sp|P16662|UD2B7_HUMAN UDP-glucuronosyltransferase 2B7 OS=Homo sapiens OX=9606 GN=UGT2B7 PE=1 SV=2	509	TKCCLFCFWKFARKAKKGKND
0.15	Q9NQ34	sp|Q9NQ34|TMM9B_HUMAN Transmembrane protein 9B OS=Homo sapiens OX=9606 GN=TMEM9B PE=1 SV=1	75	MPVRGPDVEAYCLRCECKYEERSSVTIKVTI
0.15	Q9Y5Z9	sp|Q9Y5Z9|UBIA1_HUMAN UbiA prenyltransferase domain-containing protein 1 OS=Homo sapiens OX=9606 GN=UBIAD1 PE=1 SV=1	130	DVVRFGVFLYTLGCVCAACLYYLSPLKLEHL
0.15	P35503	sp|P35503|UD13_HUMAN UDP-glucuronosyltransferase 1A3 OS=Homo sapiens OX=9606 GN=UGT1A3 PE=1 SV=1	508	FKCCAYGYRKCLGKKGRVKKAHKSKTH
0.15	Q8N4V2	sp|Q8N4V2|SVOP_HUMAN Synaptic vesicle 2-related protein OS=Homo sapiens OX=9606 GN=SVOP PE=1 SV=1	346	DVCGISSRKKAVEAKCSLACEYLSEEDYMDL
0.15	Q8TDI8	sp|Q8TDI8|TMC1_HUMAN Transmembrane channel-like protein 1 OS=Homo sapiens OX=9606 GN=TMC1 PE=1 SV=2	605	LHTSMYFQCWAVMCCNVPEARVFKASRSNNF
0.15	Q99805	sp|Q99805|TM9S2_HUMAN Transmembrane 9 superfamily member 2 OS=Homo sapiens OX=9606 GN=TM9SF2 PE=1 SV=1	563	IILVITCSEATILLCYFHLCAEDYHWQWRSF
0.15	Q5T9Z0	sp|Q5T9Z0|TEDM1_HUMAN Transmembrane epididymal protein 1 OS=Homo sapiens OX=9606 GN=TEDDM1 PE=2 SV=1	4	KGCLLYPLCSPRNKQRCARLWKIAYGGLLKI
0.15	Q9Y519	sp|Q9Y519|T184B_HUMAN Transmembrane protein 184B OS=Homo sapiens OX=9606 GN=TMEM184B PE=1 SV=2	60	ITCHQIYMHLRCYSCPNEQRYIVRILFIVPI
0.15	O94759	sp|O94759|TRPM2_HUMAN Transient receptor potential cation channel subfamily M member 2 OS=Homo sapiens OX=9606 GN=TRPM2 PE=1 SV=2	822	QPVPSWCECAIYLWLFSLVCEEMRQLFYDPD
0.15	Q9BXR5	sp|Q9BXR5|TLR10_HUMAN Toll-like receptor 10 OS=Homo sapiens OX=9606 GN=TLR10 PE=1 SV=2	597	CCLHFDLPWYLRMLGQCTQTWHRVRKTTQEQ
0.15	Q6ZXV5	sp|Q6ZXV5|TMTC3_HUMAN Protein O-mannosyl-transferase TMTC3 OS=Homo sapiens OX=9606 GN=TMTC3 PE=1 SV=2	187	CKEQGITVVGICCVYEVFIAQGYTLPLLCTT
0.15	O14828	sp|O14828|SCAM3_HUMAN Secretory carrier-associated membrane protein 3 OS=Homo sapiens OX=9606 GN=SCAMP3 PE=1 SV=3	171	WMCSTLALLLNFLACLASFCVETNNGAGFGL
0.15	Q15043	sp|Q15043|S39AE_HUMAN Metal cation symporter ZIP14 OS=Homo sapiens OX=9606 GN=SLC39A14 PE=1 SV=3	395	IQQALFFNFLSACCCYLGLAFGILAGSHFSA
0.15	Q9H2S6	sp|Q9H2S6|TNMD_HUMAN Tenomodulin OS=Homo sapiens OX=9606 GN=TNMD PE=1 SV=1	7	ENCEDCHILNAEAFKSKKICKSLKICGLVFG
0.15	Q5HYJ1	sp|Q5HYJ1|TECRL_HUMAN Trans-2	3-enoyl-CoA reductase-like OS=Homo sapiens OX=9606 GN=TECRL PE=1 SV=1	172
0.15	O76024	sp|O76024|WFS1_HUMAN Wolframin OS=Homo sapiens OX=9606 GN=WFS1 PE=1 SV=2	522	RNFKGTYCYLVPYLVCFMWCELSVVILLEST
0.15	Q9HAW9	sp|Q9HAW9|UD18_HUMAN UDP-glucuronosyltransferase 1A8 OS=Homo sapiens OX=9606 GN=UGT1A8 PE=1 SV=1	504	FKCCAYGYRKCLGKKGRVKKAHKSKTH
0.15	Q9HD45	sp|Q9HD45|TM9S3_HUMAN Transmembrane 9 superfamily member 3 OS=Homo sapiens OX=9606 GN=TM9SF3 PE=1 SV=2	383	YYHASRAIPFGTMVAVCCICFFVILPLNLVG
0.15	O15393	sp|O15393|TMPS2_HUMAN Transmembrane protease serine 2 OS=Homo sapiens OX=9606 GN=TMPRSS2 PE=1 SV=3	107	KFMGSKCSNSGIECDSSGTCINPSNWCDGVS
0.15	Q9UIG8	sp|Q9UIG8|SO3A1_HUMAN Solute carrier organic anion transporter family member 3A1 OS=Homo sapiens OX=9606 GN=SLCO3A1 PE=1 SV=3	597	IDSTCLFWSTFCGEQGACVLYDNVVYRYLYV
0.15	Q7Z3Q1	sp|Q7Z3Q1|S46A3_HUMAN Solute carrier family 46 member 3 OS=Homo sapiens OX=9606 GN=SLC46A3 PE=1 SV=1	141	CGNYTTFWGACFAYIVDQCKEHKQKTIRIAI
0.15	O95136	sp|O95136|S1PR2_HUMAN Sphingosine 1-phosphate receptor 2 OS=Homo sapiens OX=9606 GN=S1PR2 PE=1 SV=2	245	CWLPAFSILLLDYACPVHSCPILYKAHYFFA
0.15	Q9Y2C5	sp|Q9Y2C5|S17A4_HUMAN Probable small intestine urate exporter OS=Homo sapiens OX=9606 GN=SLC17A4 PE=2 SV=1	223	CQTIGWPYVFYIFGGIGCACCPLWFPLIYDD
0.15	P16473	sp|P16473|TSHR_HUMAN Thyrotropin receptor OS=Homo sapiens OX=9606 GN=TSHR PE=1 SV=2	389	ICGDSEDMVCTPKSDEFNPCEDIMGYKFLRI
0.15	Q9NWC5	sp|Q9NWC5|TM45A_HUMAN Transmembrane protein 45A OS=Homo sapiens OX=9606 GN=TMEM45A PE=1 SV=1	21	WCTKSILKYICKKQKRTCYLGSKTLFYRLEI
0.15	Q8N8V8	sp|Q8N8V8|TM105_HUMAN Transmembrane protein 105 OS=Homo sapiens OX=9606 GN=TMEM105 PE=2 SV=1	64	PWGDCAEPSCLCEMKIRRRRHEGPAWGQSGF
0.15	Q9UM01	sp|Q9UM01|YLAT1_HUMAN Y+L amino acid transporter 1 OS=Homo sapiens OX=9606 GN=SLC7A7 PE=1 SV=2	155	YAASRLLAAACICLLTFINCAYVKWGTLVQD
0.15	Q8NDY8	sp|Q8NDY8|TMM52_HUMAN Transmembrane protein 52 OS=Homo sapiens OX=9606 GN=TMEM52 PE=2 SV=1	79	CCLRKQAQAQPHLPPARQPCDVAVIPMDSDS
0.15	Q11201	sp|Q11201|SIA4A_HUMAN CMP-N-acetylneuraminate-beta-galactosamide-alpha-2 3-sialyltransferase 1 OS=Homo sapiens OX=9606 GN=ST3GAL1 PE=2 SV=1	45	ELSENLKRLIKHRPCTCTHCIGQRKLSAWFD
0.15	Q8N4F4	sp|Q8N4F4|S22AO_HUMAN Steroid transmembrane transporter SLC22A24 OS=Homo sapiens OX=9606 GN=SLC22A24 PE=1 SV=2	170	VGRKIICKLCFLQLAISNTCAAFAPTFLVYC
0.15	A6NK97	sp|A6NK97|S22AK_HUMAN Solute carrier family 22 member 20 OS=Homo sapiens OX=9606 GN=SLC22A20P PE=2 SV=1	423	ILCTAQAALGKGCLASSFICVYLFTGELYPT
0.15	O14804	sp|O14804|TAAR5_HUMAN Trace amine-associated receptor 5 OS=Homo sapiens OX=9606 GN=TAAR5 PE=2 SV=2	99	CWFFGDFLCRLHTYLDTLFCLTSIFHLCFIS
0.15	Q9NYB5	sp|Q9NYB5|SO1C1_HUMAN Solute carrier organic anion transporter family member 1C1 OS=Homo sapiens OX=9606 GN=SLCO1C1 PE=2 SV=1	612	IDTSCLKWGFKRCGSRGSCRLYDSNVFRHIY
0.15	Q9NPD5	sp|Q9NPD5|SO1B3_HUMAN Solute carrier organic anion transporter family member 1B3 OS=Homo sapiens OX=9606 GN=SLCO1B3 PE=1 SV=1	595	IDKTCMKWSTNSCGAQGACRIYNSVFFGRVY
0.15	P35498	sp|P35498|SCN1A_HUMAN Sodium channel protein type 1 subunit alpha OS=Homo sapiens OX=9606 GN=SCN1A PE=1 SV=2	908	GMQLFGKSYKDCVCKIASDCQLPRWHMNDFF
0.15	Q96DD7	sp|Q96DD7|SHSA4_HUMAN Protein shisa-4 OS=Homo sapiens OX=9606 GN=SHISA4 PE=1 SV=3	59	HRYCCRDLTLLITERQQKHCLAFSPKTIAGI
0.15	Q6U841	sp|Q6U841|S4A10_HUMAN Sodium-driven chloride bicarbonate exchanger OS=Homo sapiens OX=9606 GN=SLC4A10 PE=1 SV=1	509	CLASFLFLYCACMSPVITFGGLLGEATEGRI
0.15	A6NIM6	sp|A6NIM6|S15A5_HUMAN Solute carrier family 15 member 5 OS=Homo sapiens OX=9606 GN=SLC15A5 PE=1 SV=2	49	VELCERFTFFEVVCNMIPFCTIKLGYHNCQA
0.15	A0A1B0GTY4	sp|A0A1B0GTY4|TEX50_HUMAN Testis-expressed protein 50 OS=Homo sapiens OX=9606 GN=TEX50 PE=3 SV=1	45	WKVKGSPSHCLPYLLDKLCCDFANMDIFQGC
0.15	Q6NUQ4	sp|Q6NUQ4|TM214_HUMAN Transmembrane protein 214 OS=Homo sapiens OX=9606 GN=TMEM214 PE=1 SV=2	636	LAWAQEHCHEACRGEVTWDCMKTQLSEAVHW
0.15	Q8WXD0	sp|Q8WXD0|RXFP2_HUMAN Relaxin receptor 2 OS=Homo sapiens OX=9606 GN=RXFP2 PE=1 SV=1	443	IKAENTTHAMSIKILCCADCLMGVYLFFVGI
0.15	Q9P2U8	sp|Q9P2U8|VGLU2_HUMAN Vesicular glutamate transporter 2 OS=Homo sapiens OX=9606 GN=SLC17A6 PE=2 SV=1	45	EDGKPLEVPERKAPLCDCTCFGLPRRYIIAI
0.15	Q9NX78	sp|Q9NX78|TM260_HUMAN Transmembrane protein 260 OS=Homo sapiens OX=9606 GN=TMEM260 PE=1 SV=3	169	AKERSKVAKIGAFCCGLSLCNQHTIILYVLC
0.15	Q9Y345	sp|Q9Y345|SC6A5_HUMAN Sodium- and chloride-dependent glycine transporter 2 OS=Homo sapiens OX=9606 GN=SLC6A5 PE=1 SV=3	608	GCCICFFIMGFPMITQGGIYMFQLVDTYAAS
0.15	Q9HBA0	sp|Q9HBA0|TRPV4_HUMAN Transient receptor potential cation channel subfamily V member 4 OS=Homo sapiens OX=9606 GN=TRPV4 PE=1 SV=2	636	LNPCANMKVCNEDQTNCTVPTYPSCRDSETF
0.15	H3BS89	sp|H3BS89|T178B_HUMAN Transmembrane protein 178B OS=Homo sapiens OX=9606 GN=TMEM178B PE=2 SV=1	203	VAGLLFLMGGTFCIISLCTCVAGINFELSRY
0.15	Q96BD0	sp|Q96BD0|SO4A1_HUMAN Solute carrier organic anion transporter family member 4A1 OS=Homo sapiens OX=9606 GN=SLCO4A1 PE=1 SV=2	551	CSCIPQNLSSGFGHATAGKCTSTCQRKPLLL
0.15	O60637	sp|O60637|TSN3_HUMAN Tetraspanin-3 OS=Homo sapiens OX=9606 GN=TSPAN3 PE=2 SV=1	71	GCCATIRESRCGLATFVIILLLVFVTEVVVV
0.15	P22310	sp|P22310|UD14_HUMAN UDP-glucuronosyltransferase 1A4 OS=Homo sapiens OX=9606 GN=UGT1A4 PE=1 SV=1	508	FKCCAYGYRKCLGKKGRVKKAHKSKTH
0.15	P19075	sp|P19075|TSN8_HUMAN Tetraspanin-8 OS=Homo sapiens OX=9606 GN=TSPAN8 PE=1 SV=1	72	LGCCGAIKESRCMLLLFFIGLLLILLLQVAT
0.15	Q7RTX0	sp|Q7RTX0|TS1R3_HUMAN Taste receptor type 1 member 3 OS=Homo sapiens OX=9606 GN=TAS1R3 PE=1 SV=2	599	VQASGGPLACFGLVCLGLVCLSVLLFPGQPS
0.15	Q9H0R3	sp|Q9H0R3|TM222_HUMAN Transmembrane protein 222 OS=Homo sapiens OX=9606 GN=TMEM222 PE=1 SV=2	135	RMHNLCCDNCHSHVALALNLMRYNNSTNWNM
0.15	Q9NRS4	sp|Q9NRS4|TMPS4_HUMAN Transmembrane protease serine 4 OS=Homo sapiens OX=9606 GN=TMPRSS4 PE=1 SV=2	64	CGQPLHFIPRKQLCDGELDCPLGEDEEHCVK
0.15	Q8TCJ2	sp|Q8TCJ2|STT3B_HUMAN Dolichyl-diphosphooligosaccharide--protein glycosyltransferase subunit STT3B OS=Homo sapiens OX=9606 GN=STT3B PE=1 SV=1	243	TGSVFWTMCCCLSYFYMVSAWGGYVFIINLI
0.15	Q9BXE9	sp|Q9BXE9|VN1R3_HUMAN Vomeronasal type-1 receptor 3 OS=Homo sapiens OX=9606 GN=VN1R3 PE=2 SV=1	81	CKFVFYVHRVGRAVCVGNACLLSVFQVITIS
0.15	Q6AZY7	sp|Q6AZY7|SCAR3_HUMAN Scavenger receptor class A member 3 OS=Homo sapiens OX=9606 GN=SCARA3 PE=1 SV=1	27	MPTFPCTQKGRPGPRCSRCQKNLSLHTSVRI
0.15	P14416	sp|P14416|DRD2_HUMAN D(2) dopamine receptor OS=Homo sapiens OX=9606 GN=DRD2 PE=1 SV=2	382	FIICWLPFFITHILNIHCDCNIPPVLYSAFT
0.15	Q8N5C1	sp|Q8N5C1|CAHM5_HUMAN Calcium homeostasis modulator protein 5 OS=Homo sapiens OX=9606 GN=CALHM5 PE=2 SV=1	75	RLFTGCCVNPRKIFPRGHSCRFFYVLGQITL
0.15	P28222	sp|P28222|5HT1B_HUMAN 5-hydroxytryptamine receptor 1B OS=Homo sapiens OX=9606 GN=HTR1B PE=1 SV=1	114	RWTLGQVVCDFWLSSDITCCTASILHLCVIA
0.15	P56750	sp|P56750|CLD17_HUMAN Claudin-17 OS=Homo sapiens OX=9606 GN=CLDN17 PE=1 SV=1	185	FCCCNRKKQGYRYPVPGYRVPHTDKRRNTTM
0.15	Q8IZR5	sp|Q8IZR5|CKLF4_HUMAN CKLF-like MARVEL transmembrane domain-containing protein 4 OS=Homo sapiens OX=9606 GN=CMTM4 PE=1 SV=1	62	VILALIAFICIETIMACSPCEGLYFFEFVSC
0.15	Q9NYQ8	sp|Q9NYQ8|FAT2_HUMAN Protocadherin Fat 2 OS=Homo sapiens OX=9606 GN=FAT2 PE=1 SV=2	4019	DRCEMEARGCSEGHCLVTPEIQRGDWGQQEL
0.15	Q9UL01	sp|Q9UL01|DSE_HUMAN Dermatan-sulfate epimerase OS=Homo sapiens OX=9606 GN=DSE PE=1 SV=1	934	CLYAVLLIDSCILLWLYSSCSQSQC
0.15	Q9Y6H8	sp|Q9Y6H8|CXA3_HUMAN Gap junction alpha-3 protein OS=Homo sapiens OX=9606 GN=GJA3 PE=1 SV=4	46	GDEQSDFTCNTQQPGCENVCYDRAFPISHIR
0.15	O75712	sp|O75712|CXB3_HUMAN Gap junction beta-3 protein OS=Homo sapiens OX=9606 GN=GJB3 PE=1 SV=1	45	GDEQKDFDCNTKQPGCTNVCYDNYFPISNIR
0.15	Q6UW88	sp|Q6UW88|EPGN_HUMAN Epigen OS=Homo sapiens OX=9606 GN=EPGN PE=1 SV=2	81	KAICRCFTGYTGERCEHLTLTSYAVDSYEKY
0.15	Q14574	sp|Q14574|DSC3_HUMAN Desmocollin-3 OS=Homo sapiens OX=9606 GN=DSC3 PE=1 SV=3	661	TKLLRVNLCECTHPTQCRATSRSTGVILGKW
0.15	O95490	sp|O95490|AGRL2_HUMAN Adhesion G protein-coupled receptor L2 OS=Homo sapiens OX=9606 GN=ADGRL2 PE=1 SV=2	851	TWVGIVISLVCLAICIFTFCFFRGLQSDRNT
0.15	Q9H461	sp|Q9H461|FZD8_HUMAN Frizzled-8 OS=Homo sapiens OX=9606 GN=FZD8 PE=1 SV=1	605	WSGKTLESWRSLCTRCCWASKGAAVGGGAGA
0.15	P21860	sp|P21860|ERBB3_HUMAN Receptor tyrosine-protein kinase erbB-3 OS=Homo sapiens OX=9606 GN=ERBB3 PE=1 SV=1	614	HENCTQGCKGPELQDCLGQTLVLIGKTHLTM
0.15	Q86SJ6	sp|Q86SJ6|DSG4_HUMAN Desmoglein-4 OS=Homo sapiens OX=9606 GN=DSG4 PE=1 SV=1	652	LCCCKQRQPEGLGTRFAPVPEGGEGVMQSWR
0.15	Q86XM0	sp|Q86XM0|CTSRD_HUMAN Cation channel sperm-associated protein subunit delta OS=Homo sapiens OX=9606 GN=CATSPERD PE=1 SV=3	747	LRTARGRRIKKCATQLCRRCKTVCQFRASAT
0.15	Q99680	sp|Q99680|GPR22_HUMAN G-protein coupled receptor 22 OS=Homo sapiens OX=9606 GN=GPR22 PE=2 SV=2	106	SLESNTALICCFHEACVSFASVSTAINVFAI
0.15	Q9BZJ7	sp|Q9BZJ7|GPR62_HUMAN G-protein coupled receptor 62 OS=Homo sapiens OX=9606 GN=GPR62 PE=1 SV=2	243	PALAVGQFAACWLPYGCACLAPAARAAEAEA
0.15	Q9UNW8	sp|Q9UNW8|GP132_HUMAN Probable G-protein coupled receptor 132 OS=Homo sapiens OX=9606 GN=GPR132 PE=1 SV=1	129	SILFLCCISCDRFVAVVYALESRGRRRRRTA
0.15	Q6ZU69	sp|Q6ZU69|F205A_HUMAN Protein FAM205A OS=Homo sapiens OX=9606 GN=FAM205A PE=2 SV=4	30	QVKRSHHELSSEPKRSCCRCHQKVRQRARDA
0.15	Q8N1N2	sp|Q8N1N2|DYNAP_HUMAN Dynactin-associated protein OS=Homo sapiens OX=9606 GN=DYNAP PE=1 SV=1	86	LAHSRCLQSESCNTQVKEYCRNDWSMWKVFL
0.15	Q5T442	sp|Q5T442|CXG2_HUMAN Gap junction gamma-2 protein OS=Homo sapiens OX=9606 GN=GJC2 PE=1 SV=1	48	SDEQAKFTCNTRQPGCDNVCYDAFAPLSHVR
0.15	Q5RI15	sp|Q5RI15|COX20_HUMAN Cytochrome c oxidase assembly protein COX20 mitochondrial OS=Homo sapiens OX=9606 GN=COX20 PE=1 SV=2	58	SCDVGVGGFILVTLGCWFHCRYNYAKQRIQE
0.15	P35462	sp|P35462|DRD3_HUMAN D(3) dopamine receptor OS=Homo sapiens OX=9606 GN=DRD3 PE=1 SV=2	95	VWNFSRICCDVFVTLDVMMCTASILNLCAIS
0.15	P25106	sp|P25106|ACKR3_HUMAN Atypical chemokine receptor 3 OS=Homo sapiens OX=9606 GN=ACKR3 PE=1 SV=3	15	SDISWPCNSSDCIVVDTVMCPNMPNKSVLLY
0.15	P36383	sp|P36383|CXG1_HUMAN Gap junction gamma-1 protein OS=Homo sapiens OX=9606 GN=GJC1 PE=1 SV=2	45	YDEQSKFVCNTEQPGCENVCYDAFAPLSHVR
0.15	O95484	sp|O95484|CLD9_HUMAN Claudin-9 OS=Homo sapiens OX=9606 GN=CLDN9 PE=1 SV=1	180	LLCCTCPPPQVERPRGPRLGYSIPSRSGASG
0.15	Q9HBT6	sp|Q9HBT6|CAD20_HUMAN Cadherin-20 OS=Homo sapiens OX=9606 GN=CDH20 PE=2 SV=2	590	LTIQVCSCDDDGHVMSCSPEAYMLPVSLSRG
0.15	Q86V85	sp|Q86V85|GP180_HUMAN Integral membrane protein GPR180 OS=Homo sapiens OX=9606 GN=GPR180 PE=2 SV=1	359	TFAKGCILWFLCHPVLACISVIFSDYQRDKV
0.15	P08034	sp|P08034|CXB1_HUMAN Gap junction beta-1 protein OS=Homo sapiens OX=9606 GN=GJB1 PE=1 SV=1	45	GDEKSSFICNTLQPGCNSVCYDQFFPISHVR
0.15	Q9UKL4	sp|Q9UKL4|CXD2_HUMAN Gap junction delta-2 protein OS=Homo sapiens OX=9606 GN=GJD2 PE=1 SV=1	47	DDEQTMFVCNTLQPGCNQACYDRAFPISHIR
0.15	Q9P2B2	sp|Q9P2B2|FPRP_HUMAN Prostaglandin F2 receptor negative regulator OS=Homo sapiens OX=9606 GN=PTGFRN PE=1 SV=2	853	CSSHWCCKKEVQETRRERRRLMSMEMD
0.15	P21917	sp|P21917|DRD4_HUMAN D(4) dopamine receptor OS=Homo sapiens OX=9606 GN=DRD4 PE=1 SV=3	356	LLCWTPFFVVHITQALCPACSVPPRLVSAVT
0.15	Q5IJ48	sp|Q5IJ48|CRUM2_HUMAN Protein crumbs homolog 2 OS=Homo sapiens OX=9606 GN=CRB2 PE=1 SV=2	1195	SECICNARFSGQFCEVAKGLPLPLPFPLLEV
0.15	Q6P995	sp|Q6P995|F171B_HUMAN Protein FAM171B OS=Homo sapiens OX=9606 GN=FAM171B PE=2 SV=3	374	LLCYCRDKCGTPQKRERNITKLEVLKRDQTT
0.15	P43681	sp|P43681|ACHA4_HUMAN Neuronal acetylcholine receptor subunit alpha-4 OS=Homo sapiens OX=9606 GN=CHRNA4 PE=1 SV=2	252	IPCLLISCLTVLVFYLPSECGEKITLCISVL
0.15	O00400	sp|O00400|ACATN_HUMAN Acetyl-coenzyme A transporter 1 OS=Homo sapiens OX=9606 GN=SLC33A1 PE=1 SV=1	479	CVGASNQNCRTPDAVELCKKLGGSCVTALDG
0.15	Q8NGU9	sp|Q8NGU9|GP150_HUMAN Probable G-protein coupled receptor 150 OS=Homo sapiens OX=9606 GN=GPR150 PE=2 SV=1	356	QAGDCRLRRQLRKRLGSLCCAPQGGAEDEEG
0.15	P58549	sp|P58549|FXYD7_HUMAN FXYD domain-containing ion transport regulator 7 OS=Homo sapiens OX=9606 GN=FXYD7 PE=1 SV=1	47	KKVKCRKADSRSESPTCKSCKSELPSSAPGG
0.15	P40145	sp|P40145|ADCY8_HUMAN Adenylate cyclase type 8 OS=Homo sapiens OX=9606 GN=ADCY8 PE=1 SV=1	758	ITTAEDYKCLPLILRKTCCWINETYLARNVI
0.15	Q14832	sp|Q14832|GRM3_HUMAN Metabotropic glutamate receptor 3 OS=Homo sapiens OX=9606 GN=GRM3 PE=1 SV=2	584	ACLGFMCTCMVVTVFIKHNNTPLVKASGREL
0.15	P34969	sp|P34969|5HT7R_HUMAN 5-hydroxytryptamine receptor 7 OS=Homo sapiens OX=9606 GN=HTR7 PE=1 SV=2	147	KWIFGHFFCNVFIAMDVMCCTASIMTLCVIS
0.15	Q9NQ84	sp|Q9NQ84|GPC5C_HUMAN G-protein coupled receptor family C group 5 member C OS=Homo sapiens OX=9606 GN=GPRC5C PE=1 SV=2	114	STCASRRFLFGVLFAICFSCLAAHVFALNFL
0.15	Q14416	sp|Q14416|GRM2_HUMAN Metabotropic glutamate receptor 2 OS=Homo sapiens OX=9606 GN=GRM2 PE=1 SV=2	599	KASGRELCYILLGGVFLCYCMTFIFIAKPST
0.15	O15218	sp|O15218|GP182_HUMAN G-protein coupled receptor 182 OS=Homo sapiens OX=9606 GN=GPR182 PE=2 SV=1	242	ACRLRQPGQPKSRRHCLLLCAYVAVFVMCWL
0.15	O60755	sp|O60755|GALR3_HUMAN Galanin receptor type 3 OS=Homo sapiens OX=9606 GN=GALR3 PE=1 SV=1	67	ADLCFILCCVPFQATIYTLDAWLFGALVCKA
0.15	Q9UGQ2	sp|Q9UGQ2|FLOWR_HUMAN Calcium channel flower homolog OS=Homo sapiens OX=9606 GN=CACFD1 PE=1 SV=1	61	GVWMIMNAFILLLCEAPFCCQFIEFANTVAE
0.15	Q86SQ4	sp|Q86SQ4|AGRG6_HUMAN Adhesion G-protein coupled receptor G6 OS=Homo sapiens OX=9606 GN=ADGRG6 PE=1 SV=3	1113	FHCAMKENVQKQWRQHLCCGRFRLADNSDWS
0.15	Q9P296	sp|Q9P296|C5AR2_HUMAN C5a anaphylatoxin chemotactic receptor 2 OS=Homo sapiens OX=9606 GN=C5AR2 PE=1 SV=1	212	PLVAVASCHSALLCWAARRCRPLGTAIVVGF
0.15	P55283	sp|P55283|CADH4_HUMAN Cadherin-4 OS=Homo sapiens OX=9606 GN=CDH4 PE=2 SV=2	705	IIKVKVCPCDDNGDCTTIGAVAAAGLGTGAI
0.15	O75185	sp|O75185|AT2C2_HUMAN Calcium-transporting ATPase type 2C member 2 OS=Homo sapiens OX=9606 GN=ATP2C2 PE=1 SV=3	358	RVIVKKLPIVETLGCCSVLCSDKTGTLTANE
0.15	Q99678	sp|Q99678|GPR20_HUMAN G-protein coupled receptor 20 OS=Homo sapiens OX=9606 GN=GPR20 PE=1 SV=2	117	RGCLRCAFPHVLGYFLNMHCSILFLTCICVD
0.15	Q96N19	sp|Q96N19|G137A_HUMAN Integral membrane protein GPR137 OS=Homo sapiens OX=9606 GN=GPR137 PE=2 SV=2	85	PRANRLGPLPFWLLYCCPVCLQFFTLTLMNL
0.15	Q8N6F1	sp|Q8N6F1|CLD19_HUMAN Claudin-19 OS=Homo sapiens OX=9606 GN=CLDN19 PE=1 SV=2	181	FLCCTCPEPERPNSSPQPYRPGPSAAAREPV
0.15	P56746	sp|P56746|CLD15_HUMAN Claudin-15 OS=Homo sapiens OX=9606 GN=CLDN15 PE=1 SV=1	182	ACCCGSDEDPAASARRPYQAPVSVMPVATSD
0.15	P28335	sp|P28335|5HT2C_HUMAN 5-hydroxytryptamine receptor 2C OS=Homo sapiens OX=9606 GN=HTR2C PE=1 SV=1	322	IMWCPFFITNILSVLCEKSCNQKLMEKLLNV
0.15	Q9NS82	sp|Q9NS82|AAA1_HUMAN Asc-type amino acid transporter 1 OS=Homo sapiens OX=9606 GN=SLC7A10 PE=1 SV=1	358	HVRHCTPIPALLVCCGATAVIMLVGDTYTLI
0.15	Q99250	sp|Q99250|SCN2A_HUMAN Sodium channel protein type 2 subunit alpha OS=Homo sapiens OX=9606 GN=SCN2A PE=1 SV=3	730	YKFANMCLIWDCCKPWLKVKHLVNLVVMDPF
0.15	Q5VZY2	sp|Q5VZY2|PLPP4_HUMAN Phospholipid phosphatase 4 OS=Homo sapiens OX=9606 GN=PLPP4 PE=1 SV=2	179	LCAAILPLYCAMMIALSRMCDYKHHWQDSFV
0.15	Q13635	sp|Q13635|PTC1_HUMAN Protein patched homolog 1 OS=Homo sapiens OX=9606 GN=PTCH1 PE=1 SV=2	599	DLYRREDRRLDIFCCFTSPCVSRVIQVEPQA
0.15	Q96R45	sp|Q96R45|OR2A7_HUMAN Olfactory receptor 2A7 OS=Homo sapiens OX=9606 GN=OR2A7 PE=2 SV=3	219	CILCAILQIQSREVQRKAFCTCFSHLCVIGL
0.15	A6NDL8	sp|A6NDL8|O6C68_HUMAN Olfactory receptor 6C68 OS=Homo sapiens OX=9606 GN=OR6C68 PE=3 SV=2	127	PLHYMAIMSNKVCKTMVICCWMAALMIILPP
0.15	Q8NGJ3	sp|Q8NGJ3|O52E1_HUMAN Olfactory receptor 52E1 OS=Homo sapiens OX=9606 GN=OR52E1 PE=3 SV=1	119	YDCYVAICDPLCYTLVLTNKVVSVMALAIFL
0.15	Q8NGE3	sp|Q8NGE3|O10P1_HUMAN Olfactory receptor 10P1 OS=Homo sapiens OX=9606 GN=OR10P1 PE=2 SV=1	111	SECCLLTAMAYDRYVAICQPLRYSTLLSPRA
0.15	Q8NGN5	sp|Q8NGN5|O10G8_HUMAN Olfactory receptor 10G8 OS=Homo sapiens OX=9606 GN=OR10G8 PE=2 SV=1	239	TCASHCIVVLCFFGPGLFIYLRPGSRKAVDG
0.15	Q96R69	sp|Q96R69|OR4F4_HUMAN Olfactory receptor 4F4 OS=Homo sapiens OX=9606 GN=OR4F4 PE=2 SV=2	115	RYIAICKPLHYTTIMCGNACVGIMAVAWGIG
0.15	Q8NGZ9	sp|Q8NGZ9|O2T10_HUMAN Olfactory receptor 2T10 OS=Homo sapiens OX=9606 GN=OR2T10 PE=2 SV=1	110	AECCLLAAMAYDRYVAICHPLRYSVLMSHRV
0.15	Q9H6A9	sp|Q9H6A9|PCX3_HUMAN Pecanex-like protein 3 OS=Homo sapiens OX=9606 GN=PCNX3 PE=1 SV=2	847	MHGHNWVIAYSRPVYFCICCLLIWLLDALGS
0.15	Q8IY49	sp|Q8IY49|PAQRA_HUMAN Monocyte to macrophage differentiation factor 2 OS=Homo sapiens OX=9606 GN=MMD2 PE=1 SV=2	157	TGSCVQFLRGEACPKAGTACLPARYKLVELL
0.15	Q9NXK6	sp|Q9NXK6|PAQR5_HUMAN Membrane progestin receptor gamma OS=Homo sapiens OX=9606 GN=PAQR5 PE=1 SV=2	81	SWPMLVYMCTSCVYPLVSSCAHTFSSMSKNA
0.15	A6NFC9	sp|A6NFC9|OR2W5_HUMAN Putative olfactory receptor 2W5 OS=Homo sapiens OX=9606 GN=OR2W5 PE=5 SV=1	160	CPQTMQLSRCGRRRVDHFLCEMPALIAMSCE
0.15	O43614	sp|O43614|OX2R_HUMAN Orexin receptor type 2 OS=Homo sapiens OX=9606 GN=HCRTR2 PE=1 SV=2	366	FLSGKFREEFKAAFSCCCLGVHHRQEDRLTR
0.15	Q8NGU1	sp|Q8NGU1|OR9A1_HUMAN Putative olfactory receptor 9A1 OS=Homo sapiens OX=9606 GN=OR9A1P PE=5 SV=2	47	TVCVDKCLQSPIYFFLGHLCVLEILITSTAV
0.15	Q96R08	sp|Q96R08|OR5BC_HUMAN Olfactory receptor 5B12 OS=Homo sapiens OX=9606 GN=OR5B12 PE=2 SV=2	122	AALCKPLHYTTTMTTNVCACLAIGSYICGFL
0.15	Q9HB89	sp|Q9HB89|NMUR1_HUMAN Neuromedin-U receptor 1 OS=Homo sapiens OX=9606 GN=NMUR1 PE=2 SV=1	359	MSSRFRETFQEALCLGACCHRLRPRHSSHSL
0.15	Q9Y5W7	sp|Q9Y5W7|SNX14_HUMAN Sorting nexin-14 OS=Homo sapiens OX=9606 GN=SNX14 PE=1 SV=3	19	DVGREICRQYPLFCFLLLCLSAASLLLNRYI
0.15	P46721	sp|P46721|SO1A2_HUMAN Solute carrier organic anion transporter family member 1A2 OS=Homo sapiens OX=9606 GN=SLCO1A2 PE=2 SV=1	484	CSCIQTSGNSSAVLGLCDKGPDCSLMLQYFL
0.15	Q9NY46	sp|Q9NY46|SCN3A_HUMAN Sodium channel protein type 3 subunit alpha OS=Homo sapiens OX=9606 GN=SCN3A PE=1 SV=2	900	GMQLFGKSYKECVCKINDDCTLPRWHMNDFF
0.15	Q9NSD5	sp|Q9NSD5|S6A13_HUMAN Sodium- and chloride-dependent GABA transporter 2 OS=Homo sapiens OX=9606 GN=SLC6A13 PE=1 SV=3	203	ALRWELALCLLLAWVICYFCIWKGVKSTGKV
0.15	O43868	sp|O43868|S28A2_HUMAN Sodium/nucleoside cotransporter 2 OS=Homo sapiens OX=9606 GN=SLC28A2 PE=2 SV=2	595	CVSFPNTSFTNRTYETYMCCRGLFQSTSLNG
0.15	Q96NR3	sp|Q96NR3|PTHD1_HUMAN Patched domain-containing protein 1 OS=Homo sapiens OX=9606 GN=PTCHD1 PE=2 SV=2	273	VTSLILVVTMAILCCSMQDCVRSKPWLGLLG
0.15	Q5TZ20	sp|Q5TZ20|OR2G6_HUMAN Olfactory receptor 2G6 OS=Homo sapiens OX=9606 GN=OR2G6 PE=1 SV=1	49	CCLDSRLHTPMYFFLSNLSCVDICFTTSVAP
0.15	Q9H3R2	sp|Q9H3R2|MUC13_HUMAN Mucin-13 OS=Homo sapiens OX=9606 GN=MUC13 PE=1 SV=3	396	QEDANGNCQKCAFGYSGLDCKDKFQLILTIV
0.15	Q9NXI6	sp|Q9NXI6|RN186_HUMAN E3 ubiquitin-protein ligase RNF186 OS=Homo sapiens OX=9606 GN=RNF186 PE=1 SV=1	187	ALALLMSTLFCCLPSTRGSCWPSSRTLFCRE
0.15	P35499	sp|P35499|SCN4A_HUMAN Sodium channel protein type 4 subunit alpha OS=Homo sapiens OX=9606 GN=SCN4A PE=1 SV=4	549	YKCAHKVLIWNCCAPWLKFKNIIHLIVMDPF
0.15	Q9UN76	sp|Q9UN76|S6A14_HUMAN Sodium- and chloride-dependent neutral and basic amino acid transporter B(0+) OS=Homo sapiens OX=9606 GN=SLC6A14 PE=2 SV=1	336	YNKFKNNCFSDAIVVCLTNCLTSVFAGFAIF
0.15	P0CK96	sp|P0CK96|S352B_HUMAN Solute carrier family 35 member E2B OS=Homo sapiens OX=9606 GN=SLC35E2B PE=2 SV=1	109	AVQMLSTTVIGCVKTLVPCCLYQHKARLSYP
0.15	P30531	sp|P30531|SC6A1_HUMAN Sodium- and chloride-dependent GABA transporter 1 OS=Homo sapiens OX=9606 GN=SLC6A1 PE=1 SV=2	310	NSFHNNVYRDSIIVCCINSCTSMFAGFVIFS
0.15	P04000	sp|P04000|OPSR_HUMAN Long-wave-sensitive opsin 1 OS=Homo sapiens OX=9606 GN=OPN1LW PE=1 SV=1	271	VVMIFAYCVCWGPYTFFACFAAANPGYAFHP
0.15	Q8NH87	sp|Q8NH87|OR9G1_HUMAN Olfactory receptor 9G1 OS=Homo sapiens OX=9606 GN=OR9G1 PE=3 SV=1	79	KILVTCISEDKSISFAGCLCQFFFSAGLAYS
0.15	Q8NGN7	sp|Q8NGN7|O10D4_HUMAN Putative olfactory receptor 10D4 OS=Homo sapiens OX=9606 GN=OR10D4P PE=5 SV=1	108	TECFLYTVMACDRFVAICFPLRYTVIMNHRV
0.15	Q8NG78	sp|Q8NG78|OR8G5_HUMAN Olfactory receptor 8G5 OS=Homo sapiens OX=9606 GN=OR8G5 PE=2 SV=2	195	IGCMFRVQFCKFDVINHYFCDLISILKLSCS
0.15	P0C646	sp|P0C646|O52Z1_HUMAN Olfactory receptor 52Z1 OS=Homo sapiens OX=9606 GN=OR52Z1 PE=3 SV=2	153	YCGRNIIPHSYCEHIARLACGNINVNIIYGL
0.15	Q96R54	sp|Q96R54|O14A2_HUMAN Olfactory receptor 14A2 OS=Homo sapiens OX=9606 GN=OR14A2 PE=3 SV=2	120	RYVAICCPLNYEVIMNTGVCVLMASVSWAIG
0.15	Q01974	sp|Q01974|ROR2_HUMAN Tyrosine-protein kinase transmembrane receptor ROR2 OS=Homo sapiens OX=9606 GN=ROR2 PE=1 SV=2	375	PWCFTQNKNVRMELCDVPSCSPRDSSKMGIL
0.15	P07202	sp|P07202|PERT_HUMAN Thyroid peroxidase OS=Homo sapiens OX=9606 GN=TPO PE=1 SV=4	819	GGFQCLCADPYELGDDGRTCVDSGRLPRVTW
0.15	Q8NGU4	sp|Q8NGU4|OR2I1_HUMAN Putative olfactory receptor 2I1 OS=Homo sapiens OX=9606 GN=OR2I1P PE=5 SV=1	223	ARAVCCMRFSGGRRRAVGTCGSHLTAVCLFY
0.15	Q8NGG6	sp|Q8NGG6|OR8BC_HUMAN Olfactory receptor 8B12 OS=Homo sapiens OX=9606 GN=OR8B12 PE=2 SV=1	121	RYVAICNPLLYTVTMSCQVCLLLLLGAYGMG
0.15	Q8NGB4	sp|Q8NGB4|OR4S1_HUMAN Olfactory receptor 4S1 OS=Homo sapiens OX=9606 GN=OR4S1 PE=3 SV=1	120	RYVAICRPLHYTAIMDCRKCGLLAGASWLAG
0.15	Q15620	sp|Q15620|OR8B8_HUMAN Olfactory receptor 8B8 OS=Homo sapiens OX=9606 GN=OR8B8 PE=2 SV=2	160	TACMMGVTFCANNLVNHYMCDILPLLECACT
0.15	Q8NH89	sp|Q8NH89|O5AK3_HUMAN Putative olfactory receptor 5AK3 OS=Homo sapiens OX=9606 GN=OR5AK3P PE=5 SV=1	108	ATSDCYLLAIMAMDCYVAICKPLRYPMIMSQ
0.15	P0C623	sp|P0C623|OR4Q2_HUMAN Olfactory receptor 4Q2 OS=Homo sapiens OX=9606 GN=OR4Q2 PE=3 SV=2	124	YVAICRPLHYTTVMSRGLCCVLVAASWMGGF
0.15	Q96N87	sp|Q96N87|S6A18_HUMAN Inactive sodium-dependent neutral amino acid transporter B(0)AT3 OS=Homo sapiens OX=9606 GN=SLC6A18 PE=2 SV=2	445	TGLVCLVCFLSATCFTLQSGNYWLEIFDNFA
0.15	P48029	sp|P48029|SC6A8_HUMAN Sodium- and chloride-dependent creatine transporter 1 OS=Homo sapiens OX=9606 GN=SLC6A8 PE=1 SV=1	450	CCALCFVIDLSMVTDGGMYVFQLFDYYSASG
0.15	Q99500	sp|Q99500|S1PR3_HUMAN Sphingosine 1-phosphate receptor 3 OS=Homo sapiens OX=9606 GN=S1PR3 PE=1 SV=2	255	CWSPLFILFLIDVACRVQACPILFKAQWFIV
0.15	Q96AA3	sp|Q96AA3|RFT1_HUMAN Protein RFT1 homolog OS=Homo sapiens OX=9606 GN=RFT1 PE=1 SV=1	490	CCEQGWPARLAHIAVGAFCLGATLGTAFLTE
0.15	P31391	sp|P31391|SSR4_HUMAN Somatostatin receptor type 4 OS=Homo sapiens OX=9606 GN=SSTR4 PE=2 SV=2	314	LSDNFRRFFQRVLCLRCCLLEGAGGAEEEPL
0.15	Q8IY50	sp|Q8IY50|S35F3_HUMAN Putative thiamine transporter SLC35F3 OS=Homo sapiens OX=9606 GN=SLC35F3 PE=2 SV=2	118	GHVCKSTEKQSVKQRYRECCRFFGDNGLTLK
0.15	Q495M3	sp|Q495M3|S36A2_HUMAN Proton-coupled amino acid transporter 2 OS=Homo sapiens OX=9606 GN=SLC36A2 PE=1 SV=1	89	LSLLVMGFIACHCMHILVKCAQRFCKRLNKP
0.15	Q8N697	sp|Q8N697|S15A4_HUMAN Solute carrier family 15 member 4 OS=Homo sapiens OX=9606 GN=SLC15A4 PE=1 SV=1	133	CGSARLLNCTAPGPDAAARCCSPATFAGLVL
0.15	Q9HCN3	sp|Q9HCN3|PGAP6_HUMAN Post-GPI attachment to proteins factor 6 OS=Homo sapiens OX=9606 GN=PGAP6 PE=1 SV=3	516	YLYASCSCKAGWRGWSCTDNSTAQTVAQQRA
0.15	Q96FM1	sp|Q96FM1|PGAP3_HUMAN Post-GPI attachment to proteins factor 3 OS=Homo sapiens OX=9606 GN=PGAP3 PE=1 SV=2	165	EKMDYFCASTVILHSIYLCCVRTVGLQHPAV
0.15	Q96RV3	sp|Q96RV3|PCX1_HUMAN Pecanex-like protein 1 OS=Homo sapiens OX=9606 GN=PCNX1 PE=1 SV=2	1060	RHGHNRIIAYSRPVYFCICCGLIWLLDYGSR
0.15	Q8NGG0	sp|Q8NGG0|OR8J3_HUMAN Olfactory receptor 8J3 OS=Homo sapiens OX=9606 GN=OR8J3 PE=3 SV=1	160	SPCIFSVSYCSSNIINHFYCDIAPLLALSCS
0.15	Q9H339	sp|Q9H339|O51B5_HUMAN Olfactory receptor 51B5 OS=Homo sapiens OX=9606 GN=OR51B5 PE=2 SV=2	226	IASREERAKALITCVSHICCVLVFYVTVIGL
0.15	A6NMS3	sp|A6NMS3|OR5K4_HUMAN Olfactory receptor 5K4 OS=Homo sapiens OX=9606 GN=OR5K4 PE=3 SV=1	56	LTPMYIFLGNLALMDSCCSCAVTPKMLENFF
0.15	Q8NGY2	sp|Q8NGY2|OR6K2_HUMAN Olfactory receptor 6K2 OS=Homo sapiens OX=9606 GN=OR6K2 PE=2 SV=1	129	LHYPSIMTPKLCTQLTLSCCVCGFITPLPEI
0.15	Q14524	sp|Q14524|SCN5A_HUMAN Sodium channel protein type 5 subunit alpha OS=Homo sapiens OX=9606 GN=SCN5A PE=1 SV=2	896	CGEWIETMWDCMEVSGQSLCLLVFLLVMVIG
0.15	Q9HBU9	sp|Q9HBU9|POPD2_HUMAN Popeye domain-containing protein 2 OS=Homo sapiens OX=9606 GN=POPDC2 PE=2 SV=2	57	LSAGYLCCVLWGWFSACGLDIVLWSFLLAVV
0.15	Q8TDX9	sp|Q8TDX9|PK1L1_HUMAN Polycystic kidney disease protein 1-like 1 OS=Homo sapiens OX=9606 GN=PKD1L1 PE=1 SV=1	2159	FGQEQCVQWLHLLSLSVVCCIFITQPLMVCL
0.15	P0DN77	sp|P0DN77|OPSG2_HUMAN Medium-wave-sensitive opsin 2 OS=Homo sapiens OX=9606 GN=OPN1MW2 PE=3 SV=1	271	VVMVLAFCFCWGPYAFFACFAAANPGYPFHP
0.15	Q8NG84	sp|Q8NG84|O2AK2_HUMAN Olfactory receptor 2AK2 OS=Homo sapiens OX=9606 GN=OR2AK2 PE=2 SV=2	138	YVAICHPLHYPMLMSKKICCLMVACAWASGS
0.15	Q8NH05	sp|Q8NH05|OR4Q3_HUMAN Olfactory receptor 4Q3 OS=Homo sapiens OX=9606 GN=OR4Q3 PE=3 SV=1	132	RYLTVMNPQLCLWLVLACWCGGFIHSIMQVI
0.15	Q9UGF6	sp|Q9UGF6|OR5V1_HUMAN Olfactory receptor 5V1 OS=Homo sapiens OX=9606 GN=OR5V1 PE=2 SV=1	160	TVLTFCLPFCGNNQINYFFCDIPPLLILSCG
0.15	Q9UGQ3	sp|Q9UGQ3|GTR6_HUMAN Solute carrier family 2	facilitated glucose transporter member 6 OS=Homo sapiens OX=9606 GN=SLC2A6 PE=1 SV=2	463
0.15	Q8N1C3	sp|Q8N1C3|GBRG1_HUMAN Gamma-aminobutyric acid receptor subunit gamma-1 OS=Homo sapiens OX=9606 GN=GABRG1 PE=2 SV=2	415	FFCCFEDCRTGSWREGRIHIRIAKIDSYSRI
0.15	Q6PEY0	sp|Q6PEY0|CXB7_HUMAN Gap junction beta-7 protein OS=Homo sapiens OX=9606 GN=GJB7 PE=2 SV=1	45	KDEQKEFECNSRQPGCKNVCFDDFFPISQVR
0.15	O95196	sp|O95196|CSPG5_HUMAN Chondroitin sulfate proteoglycan 5 OS=Homo sapiens OX=9606 GN=CSPG5 PE=1 SV=3	394	GAFCRCNTQDYIWHKGMRCESIITDFQVMCV
0.15	Q6NT55	sp|Q6NT55|CP4FN_HUMAN Cytochrome P450 4F22 OS=Homo sapiens OX=9606 GN=CYP4F22 PE=1 SV=1	43	LRLCRSFYITCRRLRCFPQPPRRNWLLGHLG
0.15	Q8NFR9	sp|Q8NFR9|I17RE_HUMAN Interleukin-17 receptor E OS=Homo sapiens OX=9606 GN=IL17RE PE=1 SV=1	428	GCCVLVWRSDVQFAWKHLLCPDVSYRHLGLL
0.15	P37059	sp|P37059|DHB2_HUMAN Estradiol 17-beta-dehydrogenase 2 OS=Homo sapiens OX=9606 GN=HSD17B2 PE=1 SV=1	29	KSSGQLWSWMVCLAGLCAVCLLILSPFWGLI
0.15	Q96SL1	sp|Q96SL1|DIRC2_HUMAN Solute carrier family 49 member 4 OS=Homo sapiens OX=9606 GN=SLC49A4 PE=1 SV=1	443	SWFNWCLPGSCLLSLLLILCFRESYDRLYLD
0.15	O95674	sp|O95674|CDS2_HUMAN Phosphatidate cytidylyltransferase 2 OS=Homo sapiens OX=9606 GN=CDS2 PE=1 SV=1	285	RCFVCPVEYNNDTNSFTVDCEPSDLFRLQEY
0.15	P30542	sp|P30542|AA1R_HUMAN Adenosine receptor A1 OS=Homo sapiens OX=9606 GN=ADORA1 PE=1 SV=1	244	ALSWLPLHILNCITLFCPSCHKPSILTYIAI
0.15	Q6UXU4	sp|Q6UXU4|GSG1L_HUMAN Germ cell-specific gene 1-like protein OS=Homo sapiens OX=9606 GN=GSG1L PE=1 SV=2	33	CQGTQRVPKPGCGQGGRANCPNSGANATANG
0.15	P43220	sp|P43220|GLP1R_HUMAN Glucagon-like peptide 1 receptor OS=Homo sapiens OX=9606 GN=GLP1R PE=1 SV=2	328	ICIVVSKLKANLMCKTDIKCRLAKSTLTLIP
0.15	Q9NZH0	sp|Q9NZH0|GPC5B_HUMAN G-protein coupled receptor family C group 5 member B OS=Homo sapiens OX=9606 GN=GPRC5B PE=2 SV=2	120	TICSVRRFLWGVLFALCFSCLLSQAWRVRRL
0.15	Q9Y2T5	sp|Q9Y2T5|GPR52_HUMAN G-protein coupled receptor 52 OS=Homo sapiens OX=9606 GN=GPR52 PE=1 SV=2	322	SVFRLGLRRLSETMCTSCMCVKDQEAQEPKP
0.15	Q969M2	sp|Q969M2|CXA10_HUMAN Gap junction alpha-10 protein OS=Homo sapiens OX=9606 GN=GJA10 PE=2 SV=1	46	DDEQSAFACNTRQPGCNNICYDDAFPISLIR
0.15	P17302	sp|P17302|CXA1_HUMAN Gap junction alpha-1 protein OS=Homo sapiens OX=9606 GN=GJA1 PE=1 SV=2	46	GDEQSAFRCNTQQPGCENVCYDKSFPISHVR
0.15	Q86Z14	sp|Q86Z14|KLOTB_HUMAN Beta-klotho OS=Homo sapiens OX=9606 GN=KLB PE=1 SV=1	969	FENSSSRCSQTQENTECTVCLFLVQKKPLIF
0.15	O43603	sp|O43603|GALR2_HUMAN Galanin receptor type 2 OS=Homo sapiens OX=9606 GN=GALR2 PE=1 SV=1	59	TTNLFILNLGVADLCFILCCVPFQATIYTLD
0.15	P26012	sp|P26012|ITB8_HUMAN Integrin beta-8 OS=Homo sapiens OX=9606 GN=ITGB8 PE=1 SV=1	657	CKTSCALMEQQHYVDQTSECFSSPSYLRIFF
0.15	P32249	sp|P32249|GP183_HUMAN G-protein coupled receptor 183 OS=Homo sapiens OX=9606 GN=GPR183 PE=1 SV=3	215	CYSQICCKLFRTAKQNPLTEKSGVNKKALNT
0.15	Q9Y256	sp|Q9Y256|FACE2_HUMAN CAAX prenyl protease 2 OS=Homo sapiens OX=9606 GN=RCE1 PE=1 SV=1	254	LIGPVLCHSFCNYMGFPAVCAALEHPQRRPL
0.15	Q9H5J4	sp|Q9H5J4|ELOV6_HUMAN Elongation of very long chain fatty acids protein 6 OS=Homo sapiens OX=9606 GN=ELOVL6 PE=1 SV=1	206	MLMGCVVNYLVFCWMQHDQCHSHFQNIFWSS
0.15	Q9Y672	sp|Q9Y672|ALG6_HUMAN Dolichyl pyrophosphate Man9GlcNAc2 alpha-1	3-glucosyltransferase OS=Homo sapiens OX=9606 GN=ALG6 PE=1 SV=2	115
0.15	P28221	sp|P28221|5HT1D_HUMAN 5-hydroxytryptamine receptor 1D OS=Homo sapiens OX=9606 GN=HTR1D PE=1 SV=1	103	TWNFGQILCDIWLSSDITCCTASILHLCVIA
0.15	P09912	sp|P09912|IFI6_HUMAN Interferon alpha-inducible protein 6 OS=Homo sapiens OX=9606 GN=IFI6 PE=1 SV=2	11	CYLLLFTCSGVEAGKKKCSESSDSGSGFWKA
0.15	P0C7U9	sp|P0C7U9|FA87A_HUMAN Protein FAM87A OS=Homo sapiens OX=9606 GN=FAM87A PE=2 SV=1	96	LPLVRCGWACTQAMSTRSNCGSRSFLWAQTQ
0.15	Q9C0D9	sp|Q9C0D9|EPT1_HUMAN Ethanolaminephosphotransferase 1 OS=Homo sapiens OX=9606 GN=SELENOI PE=1 SV=3	298	TAFANSTCQLIVCQMSSTRCPTLNWLLVPLF
0.15	Q9NR61	sp|Q9NR61|DLL4_HUMAN Delta-like protein 4 OS=Homo sapiens OX=9606 GN=DLL4 PE=1 SV=1	500	STDTFVCNCPYGFVGSRCEFPVGLPPSFPWV
0.15	P98164	sp|P98164|LRP2_HUMAN Low-density lipoprotein receptor-related protein 2 OS=Homo sapiens OX=9606 GN=LRP2 PE=1 SV=3	4394	TDLPKCKCPSGYTGKYCEMAFSKGISPGTTA
0.15	Q7Z7J7	sp|Q7Z7J7|LHPL4_HUMAN LHFPL tetraspan subfamily member 4 protein OS=Homo sapiens OX=9606 GN=LHFPL4 PE=1 SV=1	119	CNTATVYKICAWMQLLAALCLVLGCMIFPDG
0.15	Q9Y693	sp|Q9Y693|LHPL6_HUMAN LHFPL tetraspan subfamily member 6 protein OS=Homo sapiens OX=9606 GN=LHFPL6 PE=2 SV=1	93	CGLLLLVALTALMGCCVSDLISRTVGRVAGG
0.15	Q8IZA0	sp|Q8IZA0|K319L_HUMAN Dyslexia-associated protein KIAA0319-like protein OS=Homo sapiens OX=9606 GN=KIAA0319L PE=1 SV=2	953	CCCKRQKGKPKRKSKYKILDATDQESLELKP
0.15	P98153	sp|P98153|IDD_HUMAN Integral membrane protein DGCR2/IDD OS=Homo sapiens OX=9606 GN=DGCR2 PE=1 SV=1	320	YRKDPKECCKFMCLDPDGNSLFDSMASGMRL
0.15	O00155	sp|O00155|GPR25_HUMAN Probable G-protein coupled receptor 25 OS=Homo sapiens OX=9606 GN=GPR25 PE=1 SV=2	147	ARPLRTPRCALASCCGVWAVALLAGLPSLVY
0.15	P23945	sp|P23945|FSHR_HUMAN Follicle-stimulating hormone receptor OS=Homo sapiens OX=9606 GN=FSHR PE=1 SV=3	337	LCNEVVDVTCSPKPDAFNPCEDIMGYNILRV
0.15	Q96KN9	sp|Q96KN9|CXD4_HUMAN Gap junction delta-4 protein OS=Homo sapiens OX=9606 GN=GJD4 PE=2 SV=1	46	QDEQERFVCNTLQPGCANVCYDVFSPVSHLR
0.15	Q12887	sp|Q12887|COX10_HUMAN Protoheme IX farnesyltransferase	mitochondrial OS=Homo sapiens OX=9606 GN=COX10 PE=1 SV=3	342
0.15	Q9HB14	sp|Q9HB14|KCNKD_HUMAN Potassium channel subfamily K member 13 OS=Homo sapiens OX=9606 GN=KCNK13 PE=2 SV=2	283	IKQSLNWILRKMDSGCCPQCQRGLLRSRRNV
0.15	Q12791	sp|Q12791|KCMA1_HUMAN Calcium-activated potassium channel subunit alpha-1 OS=Homo sapiens OX=9606 GN=KCNMA1 PE=1 SV=2	107	LWRTLKYLWTVCCHCGGKTKEAQKINNGSSQ
0.15	Q13241	sp|Q13241|KLRD1_HUMAN Natural killer cells antigen CD94 OS=Homo sapiens OX=9606 GN=KLRD1 PE=1 SV=2	42	PAFTPGPNIELQKDSDCCSCQEKWVGYRCNC
0.15	Q99075	sp|Q99075|HBEGF_HUMAN Proheparin-binding EGF-like growth factor OS=Homo sapiens OX=9606 GN=HBEGF PE=1 SV=1	131	SCICHPGYHGERCHGLSLPVENRLYTYDHTT
0.15	P57773	sp|P57773|CXA9_HUMAN Gap junction alpha-9 protein OS=Homo sapiens OX=9606 GN=GJA9 PE=2 SV=2	46	NDEQSGFICNTEQPGCRNVCYDQAFPISLIR
0.15	Q494W8	sp|Q494W8|CRFM7_HUMAN CHRNA7-FAM7A fusion protein OS=Homo sapiens OX=9606 GN=CHRFAM7A PE=1 SV=1	356	RFRCQDESEAVCSEWKFAACVVDRLCLMAFS
0.15	Q8TDN1	sp|Q8TDN1|KCNG4_HUMAN Potassium voltage-gated channel subfamily G member 4 OS=Homo sapiens OX=9606 GN=KCNG4 PE=1 SV=1	250	EDQGECSRKCYYIFIVETICVAWFSLEFCLR
0.15	Q9H3H5	sp|Q9H3H5|GPT_HUMAN UDP-N-acetylglucosamine--dolichyl-phosphate N-acetylglucosaminephosphotransferase OS=Homo sapiens OX=9606 GN=DPAGT1 PE=1 SV=2	68	IILFCFIPFPFLNCFVKEQCKAFPHHEFVAL
0.15	Q8TCU3	sp|Q8TCU3|S7A13_HUMAN Solute carrier family 7 member 13 OS=Homo sapiens OX=9606 GN=SLC7A13 PE=2 SV=1	37	GVLAYSCMNVGVSLCVWAGCAILAMTSTLCS
0.15	Q96FL8	sp|Q96FL8|S47A1_HUMAN Multidrug and toxin extrusion protein 1 OS=Homo sapiens OX=9606 GN=SLC47A1 PE=1 SV=1	123	LLLCCFPCWALFLNTQHILLLFRQDPDVSRL
0.15	A6NM76	sp|A6NM76|O6C76_HUMAN Olfactory receptor 6C76 OS=Homo sapiens OX=9606 GN=OR6C76 PE=3 SV=1	119	CYVAICKPLHYTTIMSDRICYQLIISSWLAG
0.15	Q8NGK4	sp|Q8NGK4|O52K1_HUMAN Olfactory receptor 52K1 OS=Homo sapiens OX=9606 GN=OR52K1 PE=2 SV=2	162	PFLLRRFHYCRGPVIAHCYCEHMAVVRLACG
0.15	O15375	sp|O15375|MOT6_HUMAN Monocarboxylate transporter 6 OS=Homo sapiens OX=9606 GN=SLC16A5 PE=1 SV=1	166	LGWRGTFLVFGGIFLHCCICGAIIRPVATSV
0.15	Q9GZU1	sp|Q9GZU1|MCLN1_HUMAN Mucolipin-1 OS=Homo sapiens OX=9606 GN=MCOLN1 PE=1 SV=1	412	NILIATLRVALPSVMRFCCCVAVIYLGYCFC
0.15	Q9H2B4	sp|Q9H2B4|S26A1_HUMAN Sulfate anion transporter 1 OS=Homo sapiens OX=9606 GN=SLC26A1 PE=1 SV=2	38	SCSCSVLCVRALVQDLLPATRWLRQYRPREY
0.15	Q9H228	sp|Q9H228|S1PR5_HUMAN Sphingosine 1-phosphate receptor 5 OS=Homo sapiens OX=9606 GN=S1PR5 PE=1 SV=1	263	CWGPLFLLLLLDVACPARTCPVLLQADPFLG
0.15	P08100	sp|P08100|OPSD_HUMAN Rhodopsin OS=Homo sapiens OX=9606 GN=RHO PE=1 SV=1	309	MNKQFRNCMLTTICCGKNPLGDDEASATVSK
0.15	Q6IFH4	sp|Q6IFH4|OR6B2_HUMAN Olfactory receptor 6B2 OS=Homo sapiens OX=9606 GN=OR6B2 PE=2 SV=2	160	VCFISSVTFCGSNVLNHFFCDISPILKLACT
0.15	Q8NGT2	sp|Q8NGT2|O13J1_HUMAN Olfactory receptor 13J1 OS=Homo sapiens OX=9606 GN=OR13J1 PE=2 SV=1	222	LATILRVPSAARCCKAFSTCLAHLAVVLLFY
0.15	A6NET4	sp|A6NET4|OR5K3_HUMAN Olfactory receptor 5K3 OS=Homo sapiens OX=9606 GN=OR5K3 PE=3 SV=1	122	CYVAICNPLQYHTMMSKTLCIQMTAGAYLAG
0.15	Q8NGH8	sp|Q8NGH8|O56A4_HUMAN Olfactory receptor 56A4 OS=Homo sapiens OX=9606 GN=OR56A4 PE=2 SV=2	163	PMLSARLRYCAGNIIKNCICSNLSVSKLSCD
0.15	Q9Y5H7	sp|Q9Y5H7|PCDA5_HUMAN Protocadherin alpha-5 OS=Homo sapiens OX=9606 GN=PCDHA5 PE=2 SV=1	721	RCSAQPTEAVCTRGKPTLLCSSAVGSWSYSQ
0.15	Q9UN73	sp|Q9UN73|PCDA6_HUMAN Protocadherin alpha-6 OS=Homo sapiens OX=9606 GN=PCDHA6 PE=2 SV=1	722	RCSAPPTEGACTADKPTLVCSSAVGSWSYSQ
0.15	Q96RD0	sp|Q96RD0|OR8B2_HUMAN Olfactory receptor 8B2 OS=Homo sapiens OX=9606 GN=OR8B2 PE=3 SV=3	160	TGCMLRLTFCSANIINHYLCDILPLLQLSCT
0.15	Q8NGQ6	sp|Q8NGQ6|OR9I1_HUMAN Olfactory receptor 9I1 OS=Homo sapiens OX=9606 GN=OR9I1 PE=3 SV=1	160	TTCTFTLSFCKDNQINFFFCDLPPLLKLACS
0.15	Q16820	sp|Q16820|MEP1B_HUMAN Meprin A subunit beta OS=Homo sapiens OX=9606 GN=MEP1B PE=1 SV=3	624	GKAECRCQSGEDWWYMGERCEKRGSTRDTIV
0.15	Q8NGT1	sp|Q8NGT1|OR2K2_HUMAN Olfactory receptor 2K2 OS=Homo sapiens OX=9606 GN=OR2K2 PE=2 SV=3	122	RYVAICNPLRYSIIMNRCVCARMATVSWVTG
0.15	O75197	sp|O75197|LRP5_HUMAN Low-density lipoprotein receptor-related protein 5 OS=Homo sapiens OX=9606 GN=LRP5 PE=1 SV=2	1355	CDSFPDCIDGSDELMCEITKPPSDDSPAHSS
0.15	P47887	sp|P47887|OR1E2_HUMAN Olfactory receptor 1E2 OS=Homo sapiens OX=9606 GN=OR1E2 PE=2 SV=2	169	TLLMARLCFCADNVIPHFFCDMSALLKLACS
0.15	P47884	sp|P47884|OR1D4_HUMAN Olfactory receptor 1D4 OS=Homo sapiens OX=9606 GN=OR1D4 PE=3 SV=3	122	RYVAICCPLHYVTAMSPGLCVLLLSLCWGLS
0.15	Q8NGT7	sp|Q8NGT7|O2A12_HUMAN Olfactory receptor 2A12 OS=Homo sapiens OX=9606 GN=OR2A12 PE=2 SV=1	109	TECLILVMMCYDRYVAICHPLQYTLIMNWRV
0.15	A6NGY5	sp|A6NGY5|O51F1_HUMAN Olfactory receptor 51F1 OS=Homo sapiens OX=9606 GN=OR51F1 PE=3 SV=1	188	CYHPDVIQLACSDIRANSICGLIDLILTTGI
0.15	Q8NGJ9	sp|Q8NGJ9|O51T1_HUMAN Olfactory receptor 51T1 OS=Homo sapiens OX=9606 GN=OR51T1 PE=3 SV=1	229	GIVARKKQQKALSTCVCHICAVTIFYVPLIS
0.15	Q96R67	sp|Q96R67|OR4CC_HUMAN Olfactory receptor 4C12 OS=Homo sapiens OX=9606 GN=OR4C12 PE=2 SV=2	118	CDCYVAICKPLNYTTIMSHSLCILLVAVAWV
0.15	Q14973	sp|Q14973|NTCP_HUMAN Sodium/bile acid cotransporter OS=Homo sapiens OX=9606 GN=SLC10A1 PE=1 SV=1	241	SALFCLNGRCRRTVSMETGCQNVQLCSTILN
0.15	Q6ZW05	sp|Q6ZW05|PTHD4_HUMAN Patched domain-containing protein 4 OS=Homo sapiens OX=9606 GN=PTCHD4 PE=2 SV=3	710	MDCISILCLIYTLNFAIDHCAPLLFTFVLAT
0.15	Q9H3S5	sp|Q9H3S5|PIGM_HUMAN GPI mannosyltransferase 1 OS=Homo sapiens OX=9606 GN=PIGM PE=1 SV=1	312	DLVFCCFLHTSIFVTFNKVCTSQYFLWYLCL
0.15	Q8NGZ0	sp|Q8NGZ0|O2AJ1_HUMAN Olfactory receptor 2AJ1 OS=Homo sapiens OX=9606 GN=OR2AJ1 PE=3 SV=1	110	GECLLLAAMSCDRYVAICHPLRYPILMKEYA
0.15	Q15617	sp|Q15617|OR8G1_HUMAN Olfactory receptor 8G1 OS=Homo sapiens OX=9606 GN=OR8G1 PE=2 SV=2	160	TGCMFRVQFCKFDLINHYFCDLLPLLKLSCS
0.15	P30954	sp|P30954|O10J1_HUMAN Olfactory receptor 10J1 OS=Homo sapiens OX=9606 GN=OR10J1 PE=2 SV=2	180	CARKVPHFFCDIRPVMKLSCIDTTVNEILTL
0.15	Q8NGL7	sp|Q8NGL7|OR4P4_HUMAN Olfactory receptor 4P4 OS=Homo sapiens OX=9606 GN=OR4P4 PE=3 SV=1	128	LHYTIIMSRQKCNTIIIVCCTGGFIHSASQF
0.15	O00476	sp|O00476|NPT4_HUMAN Sodium-dependent phosphate transport protein 4 OS=Homo sapiens OX=9606 GN=SLC17A3 PE=1 SV=2	148	ETLGWPFVFYIFGGVGCVCCLLWFVVIYDDP
0.15	P04001	sp|P04001|OPSG_HUMAN Medium-wave-sensitive opsin 1 OS=Homo sapiens OX=9606 GN=OPN1MW PE=1 SV=1	271	VVMVLAFCFCWGPYAFFACFAAANPGYPFHP
0.15	Q9Y3N9	sp|Q9Y3N9|OR2W1_HUMAN Olfactory receptor 2W1 OS=Homo sapiens OX=9606 GN=OR2W1 PE=2 SV=1	160	CTLTLNLPTCGNNILDHFLCELPALVKIACV
0.15	Q8NH76	sp|Q8NH76|O56B4_HUMAN Olfactory receptor 56B4 OS=Homo sapiens OX=9606 GN=OR56B4 PE=2 SV=1	166	PILAAQRHYCSRNEIEHCLCSNLGVISLACD
0.15	Q8NGN6	sp|Q8NGN6|O10G7_HUMAN Olfactory receptor 10G7 OS=Homo sapiens OX=9606 GN=OR10G7 PE=3 SV=1	239	TCASHCIVVLCFFGPGLFIYLRPGSRDALHG
0.15	Q8NH90	sp|Q8NH90|O5AK2_HUMAN Olfactory receptor 5AK2 OS=Homo sapiens OX=9606 GN=OR5AK2 PE=2 SV=1	160	TGFTCSLSFCKSNSINHFFCDVPPILALSCS
0.15	P30953	sp|P30953|OR1E1_HUMAN Olfactory receptor 1E1 OS=Homo sapiens OX=9606 GN=OR1E1 PE=3 SV=1	160	TLLMARLCFCADNVIPHFFCDMSALLKLAFS
0.15	Q7RTS5	sp|Q7RTS5|OTOP3_HUMAN Proton channel OTOP3 OS=Homo sapiens OX=9606 GN=OTOP3 PE=1 SV=1	171	SCTFCLNIFRVGYDVSHIRCKSQLDLVFSVI
0.15	Q8NGJ2	sp|Q8NGJ2|O52H1_HUMAN Olfactory receptor 52H1 OS=Homo sapiens OX=9606 GN=OR52H1 PE=2 SV=3	168	VFLLTCLPFCRTRIIPHTYCEHIGVAQLACA
0.15	Q8NGP8	sp|Q8NGP8|OR5M1_HUMAN Olfactory receptor 5M1 OS=Homo sapiens OX=9606 GN=OR5M1 PE=3 SV=1	124	VAICSPLHYSSRMSKNICVCLVTIPYMYGFL
0.15	Q9Y2W3	sp|Q9Y2W3|S45A1_HUMAN Proton-associated sugar transporter A OS=Homo sapiens OX=9606 GN=SLC45A1 PE=1 SV=5	542	SVGRLCSTICNMPKALRTLCVNHFLGWLSFE
0.15	Q8N4S7	sp|Q8N4S7|PAQR4_HUMAN Progestin and adipoQ receptor family member 4 OS=Homo sapiens OX=9606 GN=PAQR4 PE=2 SV=3	85	HCVACLAPPAGSVLYHLFMCHQGGSAVYARL
0.15	Q9UN74	sp|Q9UN74|PCDA4_HUMAN Protocadherin alpha-4 OS=Homo sapiens OX=9606 GN=PCDHA4 PE=1 SV=1	722	RCSALPTEGACAPGKPTLVCSSAVGSWSYSQ
0.15	P34982	sp|P34982|OR1D2_HUMAN Olfactory receptor 1D2 OS=Homo sapiens OX=9606 GN=OR1D2 PE=1 SV=2	122	RYVAICCPLHYTTAMSPKLCILLLSLCWVLS
0.15	Q9Y5P0	sp|Q9Y5P0|O51B4_HUMAN Olfactory receptor 51B4 OS=Homo sapiens OX=9606 GN=OR51B4 PE=2 SV=3	157	ILSLYCYPYCGSRALLHTFCLHQDVIKLACA
0.15	Q8NH59	sp|Q8NH59|O51Q1_HUMAN Olfactory receptor 51Q1 OS=Homo sapiens OX=9606 GN=OR51Q1 PE=2 SV=2	122	VDCYVAICCPLHYASILTNEVIGRTGLAIIC
0.15	Q96PH1	sp|Q96PH1|NOX5_HUMAN NADPH oxidase 5 OS=Homo sapiens OX=9606 GN=NOX5 PE=1 SV=1	262	DLGASVMVAKGCGQCLNFDCSFIAVLMLRRC
0.15	Q4KMZ8	sp|Q4KMZ8|NKAI1_HUMAN Sodium/potassium-transporting ATPase subunit beta-1-interacting protein 1 OS=Homo sapiens OX=9606 GN=NKAIN1 PE=2 SV=3	5	SGRCTLVAFCCLQLVAALERQIFDFLGYQWA
0.15	P41146	sp|P41146|OPRX_HUMAN Nociceptin receptor OS=Homo sapiens OX=9606 GN=OPRL1 PE=1 SV=1	322	LDENFKACFRKFCCASALRRDVQVSDRVRSI
0.15	Q8NGL9	sp|Q8NGL9|OR4CG_HUMAN Olfactory receptor 4C16 OS=Homo sapiens OX=9606 GN=OR4C16 PE=3 SV=2	158	IFLALSLPFCGPNVINHCFCDLQPLLKQACS
0.15	Q8WWG1	sp|Q8WWG1|NRG4_HUMAN Pro-neuregulin-4	membrane-bound isoform OS=Homo sapiens OX=9606 GN=NRG4 PE=1 SV=1	33
0.15	Q16891	sp|Q16891|MIC60_HUMAN MICOS complex subunit MIC60 OS=Homo sapiens OX=9606 GN=IMMT PE=1 SV=1	16	SCLCGKFVLRPLRPCRRYSTSGSSGLTTGKI
0.15	Q15049	sp|Q15049|MLC1_HUMAN Membrane protein MLC1 OS=Homo sapiens OX=9606 GN=MLC1 PE=1 SV=5	237	VACFPSAIASHVAAECPSKCLVEVLIAISSL
0.15	P35410	sp|P35410|MAS1L_HUMAN Mas-related G-protein coupled receptor MRG OS=Homo sapiens OX=9606 GN=MAS1L PE=2 SV=1	83	VLVSLCGVLLNGTVFWLLCCGATNPYMVYIL
0.15	Q9UJ96	sp|Q9UJ96|KCNG2_HUMAN Potassium voltage-gated channel subfamily G member 2 OS=Homo sapiens OX=9606 GN=KCNG2 PE=1 SV=1	206	EERGECSPKCRSLFVLETVCVAWFSFEFLLR
0.15	P08588	sp|P08588|ADRB1_HUMAN Beta-1 adrenergic receptor OS=Homo sapiens OX=9606 GN=ADRB1 PE=1 SV=2	131	CELWTSVDVLCVTASIETLCVIALDRYLAIT
0.15	O60462	sp|O60462|NRP2_HUMAN Neuropilin-2 OS=Homo sapiens OX=9606 GN=NRP2 PE=1 SV=3	889	YCTCSYSGLSSRSCTTLENYNFELYDGLKHK
0.15	Q96A59	sp|Q96A59|MALD3_HUMAN MARVEL domain-containing protein 3 OS=Homo sapiens OX=9606 GN=MARVELD3 PE=2 SV=3	197	GRACCQMLEVLLNLLILACSSVSYSSTGGYT
0.15	Q9ULI3	sp|Q9ULI3|HEG1_HUMAN Protein HEG homolog 1 OS=Homo sapiens OX=9606 GN=HEG1 PE=1 SV=3	1219	CEDGYRLENETCMSCPFGLGGLNCGNPYQLI
0.15	Q6U736	sp|Q6U736|OPN5_HUMAN Opsin-5 OS=Homo sapiens OX=9606 GN=OPN5 PE=1 SV=3	87	KPFTIISCFCHRWVFGWIGCRWYGWAGFFFG
0.15	Q8NGN2	sp|Q8NGN2|O10S1_HUMAN Olfactory receptor 10S1 OS=Homo sapiens OX=9606 GN=OR10S1 PE=2 SV=2	174	TSLTFRLLYCGPCHIAYFFCDIPPVLKLACT
0.15	Q8NGI0	sp|Q8NGI0|O52N2_HUMAN Olfactory receptor 52N2 OS=Homo sapiens OX=9606 GN=OR52N2 PE=2 SV=1	30	SLPFCFMYIIAVVGNCGLICLISHEEALHRP
0.15	Q8NHB8	sp|Q8NHB8|OR5K2_HUMAN Olfactory receptor 5K2 OS=Homo sapiens OX=9606 GN=OR5K2 PE=1 SV=3	56	HTPMYIFLGNLALVDSCCACAITPKMLENFF
0.15	Q8NGA6	sp|Q8NGA6|O10H5_HUMAN Olfactory receptor 10H5 OS=Homo sapiens OX=9606 GN=OR10H5 PE=2 SV=1	124	VAICHPLRYNVLMSLRGCTCRVGCSWAGGLV
0.15	Q6IEV9	sp|Q6IEV9|OR4CB_HUMAN Olfactory receptor 4C11 OS=Homo sapiens OX=9606 GN=OR4C11 PE=2 SV=1	158	IILALRLPFCGPYLIDHYCCDLQPLLKLACM
0.15	P47883	sp|P47883|OR3A4_HUMAN Putative olfactory receptor 3A4 OS=Homo sapiens OX=9606 GN=OR3A4P PE=5 SV=4	305	HCSSDAGVSPGPPVQSSLCCLQFTALLSPPP
0.15	Q15722	sp|Q15722|LT4R1_HUMAN Leukotriene B4 receptor 1 OS=Homo sapiens OX=9606 GN=LTB4R PE=1 SV=2	78	LAQGTWSFGLAGCRLCHYVCGVSMYASVLLI
0.15	Q96J66	sp|Q96J66|ABCCB_HUMAN ATP-binding cassette sub-family C member 11 OS=Homo sapiens OX=9606 GN=ABCC11 PE=1 SV=1	272	FEGVCYGPLVLITCASLVICSISSYFIIGYT
0.15	P41595	sp|P41595|5HT2B_HUMAN 5-hydroxytryptamine receptor 2B OS=Homo sapiens OX=9606 GN=HTR2B PE=1 SV=1	334	LLMWCPFFITNITLVLCDSCNQTTLQMLLEI
0.15	Q96EP9	sp|Q96EP9|NTCP4_HUMAN Sodium/bile acid cotransporter 4 OS=Homo sapiens OX=9606 GN=SLC10A4 PE=1 SV=2	161	FKLDEVAAVAVLLCGCCPGGNLSNLMSLLVD
0.15	Q17RQ9	sp|Q17RQ9|NKPD1_HUMAN NTPase KAP family P-loop domain-containing protein 1 OS=Homo sapiens OX=9606 GN=NKPD1 PE=2 SV=1	95	SVLGNKPATRQDCCQSEWHCRRRVCLGLLAL
0.15	Q96LB1	sp|Q96LB1|MRGX2_HUMAN Mas-related G-protein coupled receptor member X2 OS=Homo sapiens OX=9606 GN=MRGPRX2 PE=1 SV=1	76	FLFLCFQIINCLVYLSNFFCSISINFPSFFT
0.15	O15403	sp|O15403|MOT7_HUMAN Monocarboxylate transporter 7 OS=Homo sapiens OX=9606 GN=SLC16A6 PE=1 SV=2	455	YSCAAGMALAAVCLALVRPCKMGLCQHHHSG
0.15	P29376	sp|P29376|LTK_HUMAN Leukocyte tyrosine kinase receptor OS=Homo sapiens OX=9606 GN=LTK PE=1 SV=3	396	QLAECLCPEGMELAVDNVTCMDLHKPPGPLV
0.15	Q8MH63	sp|Q8MH63|LAT1N_HUMAN Putative L-type amino acid transporter 1-like protein MLAS OS=Homo sapiens OX=9606 GN=SLC7A5P1 PE=5 SV=1	159	PLFPSCPVPEEAAKLMACHCVH
0.15	Q96RP8	sp|Q96RP8|KCNA7_HUMAN Potassium voltage-gated channel subfamily A member 7 OS=Homo sapiens OX=9606 GN=KCNA7 PE=2 SV=1	212	VETLCICWFSFELLVRLLVCPSKAIFFKNVM
0.15	Q9BZV3	sp|Q9BZV3|IMPG2_HUMAN Interphotoreceptor matrix proteoglycan 2 OS=Homo sapiens OX=9606 GN=IMPG2 PE=1 SV=3	1073	HGAICRCRVGENWWYRGKHCEEFVSEPVIIG
0.15	P43116	sp|P43116|PE2R2_HUMAN Prostaglandin E2 receptor EP2 subtype OS=Homo sapiens OX=9606 GN=PTGER2 PE=2 SV=2	327	RSVLCCRISLRTQDATQTSCSTQSDASKQAD
0.15	P34995	sp|P34995|PE2R1_HUMAN Prostaglandin E2 receptor EP1 subtype OS=Homo sapiens OX=9606 GN=PTGER1 PE=2 SV=3	104	APAGGACHFLGGCMVFFGLCPLLLGCGMAVE
0.15	Q9Y5F6	sp|Q9Y5F6|PCDGM_HUMAN Protocadherin gamma-C5 OS=Homo sapiens OX=9606 GN=PCDHGC5 PE=2 SV=1	714	AKCLQGNADGDGGGGQCCRRQDSPSPDFYKQ
0.15	Q8N8D7	sp|Q8N8D7|NKAI3_HUMAN Sodium/potassium-transporting ATPase subunit beta-1-interacting protein 3 OS=Homo sapiens OX=9606 GN=NKAIN3 PE=2 SV=1	5	TGRCSLICLCALQLVSALERQIFDFLGFQWA
0.15	O15427	sp|O15427|MOT4_HUMAN Monocarboxylate transporter 4 OS=Homo sapiens OX=9606 GN=SLC16A3 PE=1 SV=1	174	YGWRGGFLILGGLLLNCCVCAALMRPLVVTA
0.15	Q9NZR2	sp|Q9NZR2|LRP1B_HUMAN Low-density lipoprotein receptor-related protein 1B OS=Homo sapiens OX=9606 GN=LRP1B PE=1 SV=2	4415	CLCSTNWSGTQCERPAPKSSKSDHISTRSIA
0.15	A4D1S0	sp|A4D1S0|KLRG2_HUMAN Killer cell lectin-like receptor subfamily G member 2 OS=Homo sapiens OX=9606 GN=KLRG2 PE=1 SV=3	285	RAGARCQQCPPGWVLSEEHCYYFSAEAQAWE
0.15	Q6PIU1	sp|Q6PIU1|KCNV1_HUMAN Potassium voltage-gated channel subfamily V member 1 OS=Homo sapiens OX=9606 GN=KCNV1 PE=1 SV=2	249	CISWFTGEFVLRFLCVRDRCRFLRKVPNIID
0.15	Q8IZF5	sp|Q8IZF5|AGRF3_HUMAN Adhesion G-protein coupled receptor F3 OS=Homo sapiens OX=9606 GN=ADGRF3 PE=2 SV=1	1032	RKRFCRAQAPSSTISLVSCCLQILSCASKSM
0.15	Q8N0Y5	sp|Q8N0Y5|OR8I2_HUMAN Olfactory receptor 8I2 OS=Homo sapiens OX=9606 GN=OR8I2 PE=2 SV=1	110	CECFLLGSMAYNRYIAICNPLLYSVVMSQKV
0.15	O95007	sp|O95007|OR6B1_HUMAN Olfactory receptor 6B1 OS=Homo sapiens OX=9606 GN=OR6B1 PE=1 SV=1	160	IYFISCLSFCGPNVINHFFCDISPVLNLSCT
0.15	Q8NH21	sp|Q8NH21|OR4F5_HUMAN Olfactory receptor 4F5 OS=Homo sapiens OX=9606 GN=OR4F5 PE=3 SV=1	115	RYIAICKPLHYTTIMCGNACVGIMAVTWGIG
0.15	Q8NH63	sp|Q8NH63|O51H1_HUMAN Olfactory receptor 51H1 OS=Homo sapiens OX=9606 GN=OR51H1 PE=3 SV=1	162	PFLIKCLPFCHSNVLSHSYCLHQNMMRLACA
0.15	Q8NG97	sp|Q8NG97|OR2Z1_HUMAN Olfactory receptor 2Z1 OS=Homo sapiens OX=9606 GN=OR2Z1 PE=2 SV=1	174	VDHFFCEVPALLKLSCADTCAYEMALSTSGV
0.15	Q6IF82	sp|Q6IF82|O4A47_HUMAN Olfactory receptor 4A47 OS=Homo sapiens OX=9606 GN=OR4A47 PE=3 SV=2	120	CYVAICKPLHYLVIMRQWVCVVLLVVSWVGG
0.15	Q8IWU2	sp|Q8IWU2|LMTK2_HUMAN Serine/threonine-protein kinase LMTK2 OS=Homo sapiens OX=9606 GN=LMTK2 PE=1 SV=2	63	ANCVSCCKDPEIDFKEFEDNFDDEIDFTPPA
0.15	Q07326	sp|Q07326|PIGF_HUMAN Phosphatidylinositol-glycan biosynthesis class F protein OS=Homo sapiens OX=9606 GN=PIGF PE=1 SV=1	72	SLSHKVTGFLKCCIYFLMSCFSFHVIFVLYG
0.15	Q6TCH4	sp|Q6TCH4|PAQR6_HUMAN Membrane progestin receptor delta OS=Homo sapiens OX=9606 GN=PAQR6 PE=1 SV=2	81	HWPLLVFLLPACLYPFASCCAHTFSSMSPRM
0.15	A6NH00	sp|A6NH00|OR2T8_HUMAN Olfactory receptor 2T8 OS=Homo sapiens OX=9606 GN=OR2T8 PE=3 SV=1	182	LVRLACADTSVFENAMYICCVLMLLVPFSLI
0.15	Q8NGM9	sp|Q8NGM9|OR8D4_HUMAN Olfactory receptor 8D4 OS=Homo sapiens OX=9606 GN=OR8D4 PE=2 SV=1	86	LCRDRSISYSGCMIQLFFFCVCVISECYMLA
0.15	Q8NGC9	sp|Q8NGC9|O11H4_HUMAN Olfactory receptor 11H4 OS=Homo sapiens OX=9606 GN=OR11H4 PE=2 SV=1	188	LCDMDPLMALSCAPAPITECIFYTQSSLVLF
0.15	Q96AM1	sp|Q96AM1|MRGRF_HUMAN Mas-related G-protein coupled receptor member F OS=Homo sapiens OX=9606 GN=MRGPRF PE=2 SV=1	191	GAACRHMDIFLGILLFLLCCPLMVLPCLALI
0.15	Q99677	sp|Q99677|LPAR4_HUMAN Lysophosphatidic acid receptor 4 OS=Homo sapiens OX=9606 GN=LPAR4 PE=1 SV=1	286	ERFAKIMYPITLCLATLNCCFDPFIYYFTLE
0.15	Q9H3M0	sp|Q9H3M0|KCNF1_HUMAN Potassium voltage-gated channel subfamily F member 1 OS=Homo sapiens OX=9606 GN=KCNF1 PE=1 SV=1	160	RWRRCQKCVWKFLEKPESSCPARVVAVLSFL
0.15	Q8N109	sp|Q8N109|KI2LA_HUMAN Killer cell immunoglobulin-like receptor 2DL5A OS=Homo sapiens OX=9606 GN=KIR2DL5A PE=3 SV=1	259	LLHCCCSNKKNAAVMDQEPAGDRTVNREDSD
0.15	Q8NGY7	sp|Q8NGY7|O10J6_HUMAN Putative olfactory receptor 10J6 OS=Homo sapiens OX=9606 GN=OR10J6P PE=5 SV=1	127	CNPLRYRVITSKKVCVQLVCGAFSIGLAMAA
0.15	Q12908	sp|Q12908|NTCP2_HUMAN Ileal sodium/bile acid cotransporter OS=Homo sapiens OX=9606 GN=SLC10A2 PE=1 SV=2	1	MNDPNSCVDNATVCSGASCVVPESNFNNILS
0.15	O00624	sp|O00624|NPT3_HUMAN Sodium-dependent phosphate transport protein 3 OS=Homo sapiens OX=9606 GN=SLC17A2 PE=2 SV=2	205	QALSWPFIFYIFGSTGCVCCLLWFTVIYDDP
0.15	Q5VXU1	sp|Q5VXU1|NKAI2_HUMAN Sodium/potassium-transporting ATPase subunit beta-1-interacting protein 2 OS=Homo sapiens OX=9606 GN=NKAIN2 PE=2 SV=1	5	SGRCTLIFICGMQLVCVLERQIFDFLGYQWA
0.15	Q01726	sp|Q01726|MSHR_HUMAN Melanocyte-stimulating hormone receptor OS=Homo sapiens OX=9606 GN=MC1R PE=1 SV=2	63	IAKNRNLHSPMYCFICCLALSDLLVSGSNVL
0.15	Q9UKV5	sp|Q9UKV5|AMFR_HUMAN E3 ubiquitin-protein ligase AMFR OS=Homo sapiens OX=9606 GN=AMFR PE=1 SV=2	92	CCVLMLVAKLIQCIVFGPLRVSERQHLKDKF
0.15	P58173	sp|P58173|OR2B6_HUMAN Olfactory receptor 2B6 OS=Homo sapiens OX=9606 GN=OR2B6 PE=2 SV=1	71	LCYTTCTVPQMLVNLCSIRKVISYRGCVAQL
0.15	Q9BY19	sp|Q9BY19|M4A8_HUMAN Membrane-spanning 4-domains subfamily A member 8 OS=Homo sapiens OX=9606 GN=MS4A8 PE=2 SV=1	201	ASSHFGCQLVCCQSSNVSVIYPNIYAANPVI
0.15	Q9Y5N1	sp|Q9Y5N1|HRH3_HUMAN Histamine H3 receptor OS=Homo sapiens OX=9606 GN=HRH3 PE=1 SV=2	369	LCWAPYTLLMIIRAACHGHCVPDYWYETSFW
0.15	Q9H237	sp|Q9H237|PORCN_HUMAN Protein-serine O-palmitoleoyltransferase porcupine OS=Homo sapiens OX=9606 GN=PORCN PE=1 SV=2	366	KRLARILSACVLSKRCPPDCSHQHRLGLGVR
0.15	Q8NG81	sp|Q8NG81|OR2M7_HUMAN Olfactory receptor 2M7 OS=Homo sapiens OX=9606 GN=OR2M7 PE=2 SV=1	160	AVATFSFSYCGSREIAHFCCDFPSLLILSCN
0.15	Q8NH19	sp|Q8NH19|O10AG_HUMAN Olfactory receptor 10AG1 OS=Homo sapiens OX=9606 GN=OR10AG1 PE=1 SV=1	151	TCQIFLLPFCGTNTINHFFCDIPPILKLACG
0.15	Q8N0Y3	sp|Q8N0Y3|OR4N4_HUMAN Olfactory receptor 4N4 OS=Homo sapiens OX=9606 GN=OR4N4 PE=2 SV=2	122	RYIAICRPLHCSTVMNPRACYAMMLALWLGG
0.15	Q8NGB2	sp|Q8NGB2|OR4C5_HUMAN Olfactory receptor 4C5 OS=Homo sapiens OX=9606 GN=OR4C5 PE=3 SV=1	143	CYVAICKPLYYLITMNRQVCGLLVAMAWVGG
0.15	P41968	sp|P41968|MC3R_HUMAN Melanocortin receptor 3 OS=Homo sapiens OX=9606 GN=MC3R PE=1 SV=3	157	TVRKALTLIVAIWVCCGVCGVVFIVYSESKM
0.15	Q3SXY7	sp|Q3SXY7|LRIT3_HUMAN Leucine-rich repeat	immunoglobulin-like domain and transmembrane domain-containing protein 3 OS=Homo sapiens OX=9606 GN=LRIT3 PE=1 SV=3	553
0.15	Q86VZ1	sp|Q86VZ1|P2RY8_HUMAN P2Y purinoceptor 8 OS=Homo sapiens OX=9606 GN=P2RY8 PE=1 SV=1	268	GKSYYHVYKLTLCLSCLNNCLDPFVYYFASR
0.15	Q8NGH5	sp|Q8NGH5|O56A1_HUMAN Olfactory receptor 56A1 OS=Homo sapiens OX=9606 GN=OR56A1 PE=2 SV=3	167	PILTSLLHYCGENVIENCICANLSVSRLSCD
0.15	Q8WZ94	sp|Q8WZ94|OR5P3_HUMAN Olfactory receptor 5P3 OS=Homo sapiens OX=9606 GN=OR5P3 PE=2 SV=1	122	RYVAICSPLLYSTCMSPGVCIILVGMSYLGG
0.15	Q9UHC9	sp|Q9UHC9|NPCL1_HUMAN NPC1-like intracellular cholesterol transporter 1 OS=Homo sapiens OX=9606 GN=NPC1L1 PE=1 SV=2	255	SCQDCAASCPAIARPQALDSTFYLGQMPGSL
0.15	Q9Y5S8	sp|Q9Y5S8|NOX1_HUMAN NADPH oxidase 1 OS=Homo sapiens OX=9606 GN=NOX1 PE=1 SV=2	72	CRNLLSFLRGTCSFCSRTLRKQLDHNLTFHK
0.15	P36021	sp|P36021|MOT8_HUMAN Monocarboxylate transporter 8 OS=Homo sapiens OX=9606 GN=SLC16A2 PE=1 SV=2	407	CRDFGGLIVVCLFLGLCDGFFITIMAPIAFE
0.15	Q16819	sp|Q16819|MEP1A_HUMAN Meprin A subunit alpha OS=Homo sapiens OX=9606 GN=MEP1A PE=1 SV=2	683	GICVNVKGMASCRCISGHAFFYTGERCQAVQ
0.15	Q86XA0	sp|Q86XA0|MET23_HUMAN Methyltransferase-like protein 23 OS=Homo sapiens OX=9606 GN=METTL23 PE=1 SV=3	47	VILSDSSELPHCLEVCRQSCQMNNLPHLQVV
0.15	O75581	sp|O75581|LRP6_HUMAN Low-density lipoprotein receptor-related protein 6 OS=Homo sapiens OX=9606 GN=LRP6 PE=1 SV=2	1341	KHKKCDHNVDCSDKSDELDCYPTEEPAPQAT
0.15	Q53RY4	sp|Q53RY4|KCP3_HUMAN Keratinocyte-associated protein 3 OS=Homo sapiens OX=9606 GN=KRTCAP3 PE=1 SV=1	183	YCCVAALTLRGVGPCRKDGLQGQLEEMTELE
0.15	Q8NGJ1	sp|Q8NGJ1|OR4D6_HUMAN Olfactory receptor 4D6 OS=Homo sapiens OX=9606 GN=OR4D6 PE=2 SV=1	240	CTSHMLVVTLHFVPCVYIYCRPFMTLPMDTT
0.15	Q9UKN1	sp|Q9UKN1|MUC12_HUMAN Mucin-12 OS=Homo sapiens OX=9606 GN=MUC12 PE=1 SV=2	5351	SGPRCLCPNTNTHWYWGETCEFNIAKSLVYG
0.15	Q6NSJ5	sp|Q6NSJ5|LRC8E_HUMAN Volume-regulated anion channel subunit LRRC8E OS=Homo sapiens OX=9606 GN=LRRC8E PE=1 SV=2	286	CRVETSEVTGYASFCCNHTKAHLFSKLAFCY
0.15	P35368	sp|P35368|ADA1B_HUMAN Alpha-1B adrenergic receptor OS=Homo sapiens OX=9606 GN=ADRA1B PE=1 SV=3	110	YWVLGRIFCDIWAAVDVLCCTASILSLCAIS
0.15	Q96LB0	sp|Q96LB0|MRGX3_HUMAN Mas-related G-protein coupled receptor member X3 OS=Homo sapiens OX=9606 GN=MRGPRX3 PE=1 SV=2	185	VFLCVVLCGSSLVLLVRILCGSRKMPLTRLY
0.15	Q8TDS7	sp|Q8TDS7|MRGRD_HUMAN Mas-related G-protein coupled receptor member D OS=Homo sapiens OX=9606 GN=MRGPRD PE=2 SV=1	134	KCHRPRHLSAWVCGLLWTLCLLMNGLTSSFC
0.15	Q2M3T9	sp|Q2M3T9|HYAL4_HUMAN Hyaluronidase-4 OS=Homo sapiens OX=9606 GN=HYAL4 PE=1 SV=2	427	AVMADTFSCHCYQGYEGADCREIKTADGCSG
0.15	Q8TDT2	sp|Q8TDT2|GP152_HUMAN Probable G-protein coupled receptor 152 OS=Homo sapiens OX=9606 GN=GPR152 PE=1 SV=1	215	TQATACRTCHRQQQPAACRGFARVARTILSA
0.15	Q9BY08	sp|Q9BY08|EBPL_HUMAN Emopamil-binding protein-like OS=Homo sapiens OX=9606 GN=EBPL PE=1 SV=1	123	EKYYRHFLQITLCVCELYGCWMTFLPEWLTR
0.15	Q96PE1	sp|Q96PE1|AGRA2_HUMAN Adhesion G protein-coupled receptor A2 OS=Homo sapiens OX=9606 GN=ADGRA2 PE=1 SV=2	1068	HHCARRRDVRASWRACCPPASPAAPHAPPRA
0.15	P08912	sp|P08912|ACM5_HUMAN Muscarinic acetylcholine receptor M5 OS=Homo sapiens OX=9606 GN=CHRM5 PE=1 SV=2	465	STFCDKCVPVTLWHLGYWLCYVNSTVNPICY
0.15	Q9Y6C9	sp|Q9Y6C9|MTCH2_HUMAN Mitochondrial carrier homolog 2 OS=Homo sapiens OX=9606 GN=MTCH2 PE=1 SV=1	249	CGLAGGCPPYSPIYTSWIDCWCMLQKEGNMS
0.15	Q53EU6	sp|Q53EU6|GPAT3_HUMAN Glycerol-3-phosphate acyltransferase 3 OS=Homo sapiens OX=9606 GN=GPAT3 PE=1 SV=2	183	DSSLKNWLSELVHLTCCRICVRALSGTIHYH
0.15	Q7L5L3	sp|Q7L5L3|GDPD3_HUMAN Lysophospholipase D GDPD3 OS=Homo sapiens OX=9606 GN=GDPD3 PE=1 SV=3	226	FFCFLPNIINRTYFPFSCSCLNQLLAVVSKW
0.15	P48960	sp|P48960|AGRE5_HUMAN Adhesion G protein-coupled receptor E5 OS=Homo sapiens OX=9606 GN=ADGRE5 PE=1 SV=4	609	GLRCRLVAGLLHYCFLAAFCWMSLEGLELYF
0.15	Q8NH16	sp|Q8NH16|OR2L2_HUMAN Olfactory receptor 2L2 OS=Homo sapiens OX=9606 GN=OR2L2 PE=2 SV=1	159	TVYALCIPYCKSRAINHFFCDVPAMLTLACT
0.15	Q96P68	sp|Q96P68|OXGR1_HUMAN 2-oxoglutarate receptor 1 OS=Homo sapiens OX=9606 GN=OXGR1 PE=2 SV=1	137	HPMSCFSIHKTRCAVVACAVVWIISLVAVIP
0.15	Q9H340	sp|Q9H340|O51B6_HUMAN Olfactory receptor 51B6 OS=Homo sapiens OX=9606 GN=OR51B6 PE=3 SV=2	226	IGSGGERAKALNTCVSHICCILVFYVTVVCL
0.15	Q8NGI1	sp|Q8NGI1|O56B2_HUMAN Putative olfactory receptor 56B2 OS=Homo sapiens OX=9606 GN=OR56B2P PE=5 SV=1	169	PLLAAQRHYCSQNQIEHCLCSNLGVTSLSCD
0.15	Q8NGN8	sp|Q8NGN8|OR4A4_HUMAN Putative olfactory receptor 4A4 OS=Homo sapiens OX=9606 GN=OR4A4P PE=5 SV=1	238	CSSHITVVVFFFVPCIFMCARPARTFSIDKS
0.15	Q8NH72	sp|Q8NH72|OR4C6_HUMAN Olfactory receptor 4C6 OS=Homo sapiens OX=9606 GN=OR4C6 PE=2 SV=1	121	YVAICKPLHYTIIMSPRVCCLMVGGAWVGGF
0.15	A6NDP7	sp|A6NDP7|MADL2_HUMAN Myeloid-associated differentiation marker-like protein 2 OS=Homo sapiens OX=9606 GN=MYADML2 PE=1 SV=3	60	FCFAVSALVVACEFTRLHGCLRLSWGNFTAA
0.15	Q8N8R3	sp|Q8N8R3|MCATL_HUMAN Mitochondrial basic amino acids transporter OS=Homo sapiens OX=9606 GN=SLC25A29 PE=1 SV=2	92	PLNQFLAGAAAGAIQCVICCPMELAKTRLQL
0.15	O95800	sp|O95800|GPR75_HUMAN Probable G-protein coupled receptor 75 OS=Homo sapiens OX=9606 GN=GPR75 PE=1 SV=1	321	VTCVIIVLSVLVCCLPLGISLVQVVLSSNGS
0.15	Q8IZF6	sp|Q8IZF6|AGRG4_HUMAN Adhesion G-protein coupled receptor G4 OS=Homo sapiens OX=9606 GN=ADGRG4 PE=2 SV=2	2986	HCVMKESVREQWQIHLCCGWLRLDNSSDGSS
0.15	Q14246	sp|Q14246|AGRE1_HUMAN Adhesion G protein-coupled receptor E1 OS=Homo sapiens OX=9606 GN=ADGRE1 PE=2 SV=3	627	CRSIRNHNTYLHLHLCVCLLLAKTLFLAGIH
0.15	Q02505	sp|Q02505|MUC3A_HUMAN Mucin-3A OS=Homo sapiens OX=9606 GN=MUC3A PE=1 SV=3	3199	SGPTCRCYSTDTHWFSGPRCEVAVHWRALVG
0.15	Q9H195	sp|Q9H195|MUC3B_HUMAN Mucin-3B (Fragments) OS=Homo sapiens OX=9606 GN=MUC3B PE=2 SV=2	1113	SGPACRCYSTDTHWFSGPRCEVTVHWRALVG
0.15	Q96T53	sp|Q96T53|MBOA4_HUMAN Ghrelin O-acyltransferase OS=Homo sapiens OX=9606 GN=MBOAT4 PE=1 SV=2	69	CAVALLCSLAPQQVHRWTFCFQMSWQTLCHL
0.15	P22888	sp|P22888|LSHR_HUMAN Lutropin-choriogonadotropic hormone receptor OS=Homo sapiens OX=9606 GN=LHCGR PE=1 SV=4	334	GFCLPKTPRCAPEPDAFNPCEDIMGYDFLRV
0.15	Q9H013	sp|Q9H013|ADA19_HUMAN Disintegrin and metalloproteinase domain-containing protein 19 OS=Homo sapiens OX=9606 GN=ADAM19 PE=1 SV=3	670	CHCLPGWAPPFCNTPGHGGSIDSGPMPPESV
0.15	Q86SP6	sp|Q86SP6|GP149_HUMAN Probable G-protein coupled receptor 149 OS=Homo sapiens OX=9606 GN=GPR149 PE=2 SV=2	167	LPLCGWGAFVRTPWGCLVDCSSSYVLFLSIV
0.15	Q01718	sp|Q01718|ACTHR_HUMAN Adrenocorticotropic hormone receptor OS=Homo sapiens OX=9606 GN=MC2R PE=1 SV=1	244	FCPSNPYCACYMSLFQVNGMLIMCNAVIDPF
0.15	Q5H8A4	sp|Q5H8A4|PIGG_HUMAN GPI ethanolamine phosphate transferase 2 OS=Homo sapiens OX=9606 GN=PIGG PE=1 SV=1	491	CTSAESSCYFCGLSWLAAGGVMVLASALLCV
0.15	Q8NH06	sp|Q8NH06|OR1P1_HUMAN Olfactory receptor 1P1 OS=Homo sapiens OX=9606 GN=OR1P1 PE=2 SV=2	183	CSAILPGFFCDLGPLMKVSCSDAQVNELVLL
0.15	O43613	sp|O43613|OX1R_HUMAN Orexin receptor type 1 OS=Homo sapiens OX=9606 GN=HCRTR1 PE=1 SV=2	364	KFREQFKAAFSCCLPGLGPCGSLKAPSPRSS
0.15	Q8NGD0	sp|Q8NGD0|OR4M1_HUMAN Olfactory receptor 4M1 OS=Homo sapiens OX=9606 GN=OR4M1 PE=2 SV=1	123	YAAICRPLHYATIMNRRLCCILVALSWMGGF
0.15	Q13224	sp|Q13224|NMDE2_HUMAN Glutamate receptor ionotropic	NMDA 2B OS=Homo sapiens OX=9606 GN=GRIN2B PE=1 SV=3	837
0.15	Q4VNC1	sp|Q4VNC1|AT134_HUMAN Probable cation-transporting ATPase 13A4 OS=Homo sapiens OX=9606 GN=ATP13A4 PE=2 SV=3	465	GIFCISPQRINVCGQLNLVCFDKTGTLTRDG
0.15	A6NND4	sp|A6NND4|O2AT4_HUMAN Olfactory receptor 2AT4 OS=Homo sapiens OX=9606 GN=OR2AT4 PE=1 SV=1	175	SIAYIYHCFCDHLAVVQASCSDTTPQTLMGF
0.15	Q8NGG8	sp|Q8NGG8|OR8B3_HUMAN Olfactory receptor 8B3 OS=Homo sapiens OX=9606 GN=OR8B3 PE=3 SV=3	160	TGCMLRLTFCSANIINHYLCDILPLLQLSCT
0.15	Q9H2C8	sp|Q9H2C8|O51V1_HUMAN Olfactory receptor 51V1 OS=Homo sapiens OX=9606 GN=OR51V1 PE=3 SV=2	169	IICLKFFNYCHFHILSHSFCLHQDLLRLACS
0.15	Q8NH79	sp|Q8NH79|OR6X1_HUMAN Olfactory receptor 6X1 OS=Homo sapiens OX=9606 GN=OR6X1 PE=2 SV=1	76	IPKLLGTFVVARTVICMSCCLLQAFFHFFVG
0.15	Q8NGF7	sp|Q8NGF7|OR5BH_HUMAN Olfactory receptor 5B17 OS=Homo sapiens OX=9606 GN=OR5B17 PE=3 SV=1	122	AAVCNPLHYTTTMTTRVCACLAIGCYVIGFL
0.15	Q9UBY5	sp|Q9UBY5|LPAR3_HUMAN Lysophosphatidic acid receptor 3 OS=Homo sapiens OX=9606 GN=LPAR3 PE=1 SV=1	167	WNCLCNISACSSLAPIYSRSYLVFWTVSNLM
0.15	P58170	sp|P58170|OR1D5_HUMAN Olfactory receptor 1D5 OS=Homo sapiens OX=9606 GN=OR1D5 PE=2 SV=1	122	RYVATCCPLHYVTAMSPGLCVLLLSLCWGLS
0.15	Q8NGL4	sp|Q8NGL4|OR5DD_HUMAN Olfactory receptor 5D13 OS=Homo sapiens OX=9606 GN=OR5D13 PE=3 SV=2	88	VVEYRTISFSGCIMQFCFACIFGVTETFMLA
0.15	Q8NGA8	sp|Q8NGA8|O4F17_HUMAN Olfactory receptor 4F17 OS=Homo sapiens OX=9606 GN=OR4F17 PE=2 SV=1	115	RYIAICKPLHYTTIMCGNACVGIMAVAWGIG
0.15	Q8NGF6	sp|Q8NGF6|O10W1_HUMAN Olfactory receptor 10W1 OS=Homo sapiens OX=9606 GN=OR10W1 PE=2 SV=1	44	TCLCTSMYYFLGSLSGIEICYTAVVVPHILA
0.15	Q8NH85	sp|Q8NH85|OR5R1_HUMAN Olfactory receptor 5R1 OS=Homo sapiens OX=9606 GN=OR5R1 PE=3 SV=1	122	CYVAICSPLHYSTLMSRRVCIQLVAVPYIYS
0.15	Q8NGV0	sp|Q8NGV0|OR2Y1_HUMAN Olfactory receptor 2Y1 OS=Homo sapiens OX=9606 GN=OR2Y1 PE=2 SV=1	169	CGHRLNHFFCEMPVFLKLACADTEGTEAKMF
0.15	Q96S97	sp|Q96S97|MYADM_HUMAN Myeloid-associated differentiation marker OS=Homo sapiens OX=9606 GN=MYADM PE=1 SV=2	69	MFTWCFCFSVTLIILIVELCGLQARFPLSWR
0.15	P33032	sp|P33032|MC5R_HUMAN Melanocortin receptor 5 OS=Homo sapiens OX=9606 GN=MC5R PE=1 SV=3	300	QEMRKTFKEIICCRGFRIACSFPRRD
0.15	Q8TAE7	sp|Q8TAE7|KCNG3_HUMAN Potassium voltage-gated channel subfamily G member 3 OS=Homo sapiens OX=9606 GN=KCNG3 PE=1 SV=1	228	CIGWFTAECIVRFIVSKNKCEFVKRPLNIID
0.15	Q96T55	sp|Q96T55|KCNKG_HUMAN Potassium channel subfamily K member 16 OS=Homo sapiens OX=9606 GN=KCNK16 PE=1 SV=1	258	LHRCCQLWLLSLRQGCGAKAAPGRRPRRGST
0.15	P15151	sp|P15151|PVR_HUMAN Poliovirus receptor OS=Homo sapiens OX=9606 GN=PVR PE=1 SV=2	367	WSKCSREVLWHCHLCPSSTEHASASANGHVS
0.15	Q9Y5H5	sp|Q9Y5H5|PCDA9_HUMAN Protocadherin alpha-9 OS=Homo sapiens OX=9606 GN=PCDHA9 PE=2 SV=1	722	RCSAMPTEGECAPGKPTLVCSSAVGSWSYSQ
0.15	P41143	sp|P41143|OPRD_HUMAN Delta-type opioid receptor OS=Homo sapiens OX=9606 GN=OPRD1 PE=1 SV=4	321	LDENFKRCFRQLCRKPCGRPDPSSFSRAREA
0.15	O60403	sp|O60403|O10H2_HUMAN Olfactory receptor 10H2 OS=Homo sapiens OX=9606 GN=OR10H2 PE=2 SV=1	124	VAICHPLRYNVLMSPRGCACLVGCSWAGGSV
0.15	Q9H209	sp|Q9H209|O10A4_HUMAN Olfactory receptor 10A4 OS=Homo sapiens OX=9606 GN=OR10A4 PE=2 SV=2	111	AECCLLATMAYDRYVAICDPLHYPVIMGHIS
0.15	Q8NGC0	sp|Q8NGC0|O5AU1_HUMAN Olfactory receptor 5AU1 OS=Homo sapiens OX=9606 GN=OR5AU1 PE=2 SV=2	227	HFFCDGPPILSLSCVDTSLCEILLFIFAGFN
0.15	Q14916	sp|Q14916|NPT1_HUMAN Sodium-dependent phosphate transport protein 1 OS=Homo sapiens OX=9606 GN=SLC17A1 PE=1 SV=2	198	WPMVFYIFGACGCAVCLLWFVLFYDDPKDHP
0.15	O75074	sp|O75074|LRP3_HUMAN Low-density lipoprotein receptor-related protein 3 OS=Homo sapiens OX=9606 GN=LRP3 PE=2 SV=2	467	CIFETWRCDGQEDCQDGSDEHGCLAAVPRKV
0.15	P43119	sp|P43119|PI2R_HUMAN Prostacyclin receptor OS=Homo sapiens OX=9606 GN=PTGIR PE=1 SV=1	295	FRKAVFQRLKLWVCCLCLGPAHGDSQTPLSQ
0.15	P47890	sp|P47890|OR1G1_HUMAN Olfactory receptor 1G1 OS=Homo sapiens OX=9606 GN=OR1G1 PE=2 SV=2	122	CYVAICHPLHYILIMSPGLCIFLVSASWIMN
0.15	P0DN78	sp|P0DN78|OPSG3_HUMAN Medium-wave-sensitive opsin 3 OS=Homo sapiens OX=9606 GN=OPN1MW3 PE=3 SV=1	271	VVMVLAFCFCWGPYAFFACFAAANPGYPFHP
0.15	Q99102	sp|Q99102|MUC4_HUMAN Mucin-4 OS=Homo sapiens OX=9606 GN=MUC4 PE=1 SV=4	2097	SGPRCSCVSFSIYTAWGEHCEHLSMKLDAFF
0.15	Q8NHC8	sp|Q8NHC8|OR2T6_HUMAN Olfactory receptor 2T6 OS=Homo sapiens OX=9606 GN=OR2T6 PE=3 SV=2	184	MLRLACGDKTTYETVMYVCCVAMLLIPFSVV
0.15	Q8IZF0	sp|Q8IZF0|NALCN_HUMAN Sodium leak channel non-selective protein OS=Homo sapiens OX=9606 GN=NALCN PE=1 SV=1	1398	CMVQPPFCTPDEFTYWATDCGNYAGALMYFC
0.15	Q96JQ5	sp|Q96JQ5|M4A4A_HUMAN Membrane-spanning 4-domains subfamily A member 4A OS=Homo sapiens OX=9606 GN=MS4A4A PE=1 SV=1	200	VSLSAFGCKVLCCTPGGVVLILPSHSHMAET
0.15	Q9UIX4	sp|Q9UIX4|KCNG1_HUMAN Potassium voltage-gated channel subfamily G member 1 OS=Homo sapiens OX=9606 GN=KCNG1 PE=1 SV=1	256	EEQGHCSQMCHNVFIVESVCVGWFSLEFLLR
0.15	P07550	sp|P07550|ADRB2_HUMAN Beta-2 adrenergic receptor OS=Homo sapiens OX=9606 GN=ADRB2 PE=1 SV=3	106	CEFWTSIDVLCVTASIETLCVIAVDRYFAIT
0.15	Q8NGG5	sp|Q8NGG5|OR8K1_HUMAN Olfactory receptor 8K1 OS=Homo sapiens OX=9606 GN=OR8K1 PE=2 SV=1	168	KLFKLSFCGSNIISYFYCDCIPLMSILCSDT
0.15	Q8NGG4	sp|Q8NGG4|OR8H1_HUMAN Olfactory receptor 8H1 OS=Homo sapiens OX=9606 GN=OR8H1 PE=2 SV=1	122	YVAICSPLRYPVIMSKRLCCALVTGPYVISF
0.15	A6NHA9	sp|A6NHA9|O4C46_HUMAN Olfactory receptor 4C46 OS=Homo sapiens OX=9606 GN=OR4C46 PE=3 SV=1	124	ICKPLHYMTIMNQCVCALLMGVVWMGGFLHA
0.15	A4D2G3	sp|A4D2G3|O2A25_HUMAN Olfactory receptor 2A25 OS=Homo sapiens OX=9606 GN=OR2A25 PE=2 SV=2	221	LCAILKIQSGEGCQKAFSICSSHLCVVGLFY
0.15	Q8NGP0	sp|Q8NGP0|OR4CD_HUMAN Olfactory receptor 4C13 OS=Homo sapiens OX=9606 GN=OR4C13 PE=2 SV=2	158	ILFICQLPFCGPNVIDHFMCDLYTLINLACT
0.15	Q8NGF8	sp|Q8NGF8|OR4B1_HUMAN Olfactory receptor 4B1 OS=Homo sapiens OX=9606 GN=OR4B1 PE=3 SV=1	120	CYVAICKPLHYMNIISRQLCHLLVAGSWLGG
0.15	O43300	sp|O43300|LRRT2_HUMAN Leucine-rich repeat transmembrane neuronal protein 2 OS=Homo sapiens OX=9606 GN=LRRTM2 PE=1 SV=3	443	ISRKCCPPTLRRIRQCSMVQNHRQLRSQTRL
0.15	Q03721	sp|Q03721|KCNC4_HUMAN Potassium voltage-gated channel subfamily C member 4 OS=Homo sapiens OX=9606 GN=KCNC4 PE=1 SV=2	284	IEGVCVLWFTLEFLVRIVCCPDTLDFVKNLL
0.15	Q9UEF7	sp|Q9UEF7|KLOT_HUMAN Klotho OS=Homo sapiens OX=9606 GN=KL PE=1 SV=2	954	PGPETLERFCPEEFTVCTECSFFHTRKSLLA
0.15	Q8NHK3	sp|Q8NHK3|KI2LB_HUMAN Killer cell immunoglobulin-like receptor 2DL5B OS=Homo sapiens OX=9606 GN=KIR2DL5B PE=3 SV=2	259	LLHCCCSNKKNAAVMDQEPAGDRTVNREDSD
0.15	Q8NC44	sp|Q8NC44|RETR2_HUMAN Reticulophagy regulator 2 OS=Homo sapiens OX=9606 GN=RETREG2 PE=1 SV=3	175	LLQYKRQNPAQFCVRVCSGCAVLAVLGHYVP
0.15	Q8NGL1	sp|Q8NGL1|OR5DI_HUMAN Olfactory receptor 5D18 OS=Homo sapiens OX=9606 GN=OR5D18 PE=2 SV=1	161	TCSALKLCFHGFNTINHFFCEFSSLLSLSCS
0.15	Q969V1	sp|Q969V1|MCHR2_HUMAN Melanin-concentrating hormone receptor 2 OS=Homo sapiens OX=9606 GN=MCHR2 PE=1 SV=1	101	FGGPLCTIITSLDTCNQFACSAIMTVMSVDR
0.15	P36544	sp|P36544|ACHA7_HUMAN Neuronal acetylcholine receptor subunit alpha-7 OS=Homo sapiens OX=9606 GN=CHRNA7 PE=1 SV=5	446	RFRCQDESEAVCSEWKFAACVVDRLCLMAFS
0.15	Q5QJU3	sp|Q5QJU3|ACER2_HUMAN Alkaline ceramidase 2 OS=Homo sapiens OX=9606 GN=ACER2 PE=1 SV=2	40	VLFFILPPICMCLFRQYATCFNSGIYLIWTL
0.15	Q6ISU1	sp|Q6ISU1|PTCRA_HUMAN Pre T-cell antigen receptor alpha OS=Homo sapiens OX=9606 GN=PTCRA PE=1 SV=1	167	LTCSCLCDPAGPLPSPATTTRLRALGSHRLH
0.15	Q96TA0	sp|Q96TA0|PCDBI_HUMAN Putative protocadherin beta-18 OS=Homo sapiens OX=9606 GN=PCDHB18P PE=5 SV=2	658	VRLCRRSRAASMGRCSVPECPFPGHLVDVSG
0.15	Q8NGZ5	sp|Q8NGZ5|OR2G2_HUMAN Olfactory receptor 2G2 OS=Homo sapiens OX=9606 GN=OR2G2 PE=3 SV=1	113	TECVLPAVMSCDRYVAVCRPLHYTVLMHIHL
0.15	Q8NGM8	sp|Q8NGM8|OR6M1_HUMAN Olfactory receptor 6M1 OS=Homo sapiens OX=9606 GN=OR6M1 PE=2 SV=1	167	CRKEINHFFCDIAPLLQVACINTHLIEKINF
0.15	A6NL08	sp|A6NL08|O6C75_HUMAN Olfactory receptor 6C75 OS=Homo sapiens OX=9606 GN=OR6C75 PE=3 SV=1	120	RCMAICKPLHYTIIMSTRVCTLLVFSSWLAG
0.15	P41231	sp|P41231|P2RY2_HUMAN P2Y purinoceptor 2 OS=Homo sapiens OX=9606 GN=P2RY2 PE=2 SV=4	41	GVVCVPGLCLNAVALYIFLCRLKTWNASTTY
0.15	Q8NH81	sp|Q8NH81|O10G6_HUMAN Olfactory receptor 10G6 OS=Homo sapiens OX=9606 GN=OR10G6 PE=3 SV=1	77	HRPMCLFLCHLSFLDMTISCAIVPKMLAGFL
0.15	P49281	sp|P49281|NRAM2_HUMAN Natural resistance-associated macrophage protein 2 OS=Homo sapiens OX=9606 GN=SLC11A2 PE=1 SV=2	527	WQCLIALGMSFLDCGHTCHLGLTAQPELYLL
0.15	Q6ZMQ8	sp|Q6ZMQ8|LMTK1_HUMAN Serine/threonine-protein kinase LMTK1 OS=Homo sapiens OX=9606 GN=AATK PE=1 SV=2	52	CLCCKKGGIGFKEFENAEGDEYAADLAQGSP
0.15	Q3C1V0	sp|Q3C1V0|M4A18_HUMAN Membrane-spanning 4-domains subfamily A member 18 OS=Homo sapiens OX=9606 GN=MS4A18 PE=2 SV=3	273	SHFGCQATCCRQFENVAVIPTVFSFNPANTT
0.15	P10321	sp|P10321|HLAC_HUMAN HLA class I histocompatibility antigen	C alpha chain OS=Homo sapiens OX=9606 GN=HLA-C PE=1 SV=3	333
0.15	O60431	sp|O60431|OR1I1_HUMAN Olfactory receptor 1I1 OS=Homo sapiens OX=9606 GN=OR1I1 PE=2 SV=1	160	TCLMAQLTFCAGSEISHFFCDLMPLLKLSGS
0.15	Q9GZK3	sp|Q9GZK3|OR2B2_HUMAN Olfactory receptor 2B2 OS=Homo sapiens OX=9606 GN=OR2B2 PE=2 SV=1	110	TECLLLAVMCFDRFVAICRPLHYSIIMHQRL
0.15	Q96RD1	sp|Q96RD1|OR6C1_HUMAN Olfactory receptor 6C1 OS=Homo sapiens OX=9606 GN=OR6C1 PE=1 SV=2	120	RYVAICKPLHCLSIMNRRVCTLLVFTSWLVS
0.15	Q96KK4	sp|Q96KK4|O10C1_HUMAN Olfactory receptor 10C1 OS=Homo sapiens OX=9606 GN=OR10C1 PE=2 SV=3	109	TECCLLAAMAYDRYAAICEPLRYPLLLSHRV
0.15	P0C626	sp|P0C626|OR5G3_HUMAN Olfactory receptor 5G3 OS=Homo sapiens OX=9606 GN=OR5G3 PE=3 SV=1	164	FCLPFCGSNIINHFFCDIFPLLSLACADTWV
0.15	P0C7T3	sp|P0C7T3|O56A5_HUMAN Olfactory receptor 56A5 OS=Homo sapiens OX=9606 GN=OR56A5 PE=3 SV=1	167	SRLRYCAGHIIKNCICTNVSVSKLSCDDITL
0.15	Q8NGC5	sp|Q8NGC5|OR6J1_HUMAN Olfactory receptor 6J1 OS=Homo sapiens OX=9606 GN=OR6J1 PE=3 SV=1	121	RYATICCPLRYTTIMRPSVCIGTVVFSWVGG
0.15	Q685J3	sp|Q685J3|MUC17_HUMAN Mucin-17 OS=Homo sapiens OX=9606 GN=MUC17 PE=1 SV=2	4364	GPQCLCVTTETHWYSGETCNQGTQKSLVYGL
0.15	Q8IWT6	sp|Q8IWT6|LRC8A_HUMAN Volume-regulated anion channel subunit LRRC8A OS=Homo sapiens OX=9606 GN=LRRC8A PE=1 SV=1	46	QVTQDKMICLPCKWVTKDSCNDSFRGWAAPG
0.15	Q6UVM3	sp|Q6UVM3|KCNT2_HUMAN Potassium channel subfamily T member 2 OS=Homo sapiens OX=9606 GN=KCNT2 PE=1 SV=1	196	FNQVLILISTLLCLIFTCICGIQHLERIGKK
0.15	P08172	sp|P08172|ACM2_HUMAN Muscarinic acetylcholine receptor M2 OS=Homo sapiens OX=9606 GN=CHRM2 PE=1 SV=1	410	NTFCAPCIPNTVWTIGYWLCYINSTINPACY
0.15	Q5FWE3	sp|Q5FWE3|PRRT3_HUMAN Proline-rich transmembrane protein 3 OS=Homo sapiens OX=9606 GN=PRRT3 PE=1 SV=3	601	TQGLSCAWGAAVALGTLCLCRRRLLDGPRGW
0.15	Q86T03	sp|Q86T03|PP4P1_HUMAN Type 1 phosphatidylinositol 4	5-bisphosphate 4-phosphatase OS=Homo sapiens OX=9606 GN=PIP4P1 PE=1 SV=1	193
0.15	Q9NUD9	sp|Q9NUD9|PIGV_HUMAN GPI mannosyltransferase 2 OS=Homo sapiens OX=9606 GN=PIGV PE=1 SV=1	137	LGCLVLHCPHQSFYAALLFCLSPANVFLAAG
0.15	Q75T13	sp|Q75T13|PGAP1_HUMAN GPI inositol-deacylase OS=Homo sapiens OX=9606 GN=PGAP1 PE=1 SV=1	673	TCQSMCFPLISLILFLFGTCTAYWSGLLSSA
0.15	Q86V24	sp|Q86V24|PAQR2_HUMAN Adiponectin receptor protein 2 OS=Homo sapiens OX=9606 GN=ADIPOR2 PE=1 SV=1	235	LYYSFYCNPQPCFIYLIVICVLGIAAIIVSQ
0.15	Q9Y5I2	sp|Q9Y5I2|PCDAA_HUMAN Protocadherin alpha-10 OS=Homo sapiens OX=9606 GN=PCDHA10 PE=2 SV=1	720	RCSAAPTEGACGPVKPTLVCSSAVGSWSYSQ
0.15	Q7RTS6	sp|Q7RTS6|OTOP2_HUMAN Proton channel OTOP2 OS=Homo sapiens OX=9606 GN=OTOP2 PE=1 SV=3	214	DQHADNPVGGDSCLCSTAVCQIFQQGYFYLY
0.15	Q8N127	sp|Q8N127|O5AS1_HUMAN Olfactory receptor 5AS1 OS=Homo sapiens OX=9606 GN=OR5AS1 PE=1 SV=1	124	AAICNPLLYTTLMSRRVCVCFIVLAYFSGST
0.15	Q8NGW1	sp|Q8NGW1|OR6B3_HUMAN Olfactory receptor 6B3 OS=Homo sapiens OX=9606 GN=OR6B3 PE=3 SV=1	160	VCFISSVTFCGSNVLNHFFCDISPILKLACT
0.15	Q01650	sp|Q01650|LAT1_HUMAN Large neutral amino acids transporter small subunit 1 OS=Homo sapiens OX=9606 GN=SLC7A5 PE=1 SV=2	163	TCPVPEEAAKLVACLCVLLLTAVNCYSVKAA
0.15	Q86WI0	sp|Q86WI0|LHPL1_HUMAN LHFPL tetraspan subfamily member 1 protein OS=Homo sapiens OX=9606 GN=LHFPL1 PE=1 SV=1	106	CCMEELISRMMGRCMGAAQFVGGLLISSGCA
0.15	Q969W9	sp|Q969W9|PMEPA_HUMAN Protein TMEPAI OS=Homo sapiens OX=9606 GN=PMEPA1 PE=1 SV=1	11	AAAAAGQPNVSCTCNCKRSLFQSMEITELEF
0.15	Q9Y5H6	sp|Q9Y5H6|PCDA8_HUMAN Protocadherin alpha-8 OS=Homo sapiens OX=9606 GN=PCDHA8 PE=2 SV=1	722	RCSALPTEGGCRAGKPTLVCSSAVGSWSYSQ
0.15	Q8N628	sp|Q8N628|OR2C3_HUMAN Olfactory receptor 2C3 OS=Homo sapiens OX=9606 GN=OR2C3 PE=2 SV=3	161	STLTMLLPLCGNNCIDHFFCEMPLIMQLACV
0.15	O14524	sp|O14524|NEMP1_HUMAN Nuclear envelope integral membrane protein 1 OS=Homo sapiens OX=9606 GN=NEMP1 PE=1 SV=2	311	CTKNLEHPIQWLYITCRKVCKGAEKPVPPRL
0.15	Q9H427	sp|Q9H427|KCNKF_HUMAN Potassium channel subfamily K member 15 OS=Homo sapiens OX=9606 GN=KCNK15 PE=1 SV=2	134	AVVRRLLLAAKCCLGLRWTCVSTENLVVAGL
0.15	Q9H6L5	sp|Q9H6L5|RETR1_HUMAN Reticulophagy regulator 1 OS=Homo sapiens OX=9606 GN=RETREG1 PE=1 SV=1	185	MSLFKQQSPGKFCLLVCSVCTFFTILGSYIP
0.15	Q9UN72	sp|Q9UN72|PCDA7_HUMAN Protocadherin alpha-7 OS=Homo sapiens OX=9606 GN=PCDHA7 PE=2 SV=1	722	RCSAPSSEGACSLVKPTLVCSSAVGSWSFSQ
0.15	Q9HC58	sp|Q9HC58|NCKX3_HUMAN Sodium/potassium/calcium exchanger 3 OS=Homo sapiens OX=9606 GN=SLC24A3 PE=2 SV=4	604	WQLDKKLGCGCLLLYGVFLCFSIMTEFNVFT
0.15	P25105	sp|P25105|PTAFR_HUMAN Platelet-activating factor receptor OS=Homo sapiens OX=9606 GN=PTAFR PE=1 SV=1	84	ILPKFLCNVAGCLFFINTYCSVAFLGVITYN
0.15	Q86SM5	sp|Q86SM5|MRGRG_HUMAN Mas-related G-protein coupled receptor member G OS=Homo sapiens OX=9606 GN=MRGPRG PE=2 SV=2	99	FSVERCLSDLFPACYQGCRPRHASAVLCALV
0.15	Q86UP9	sp|Q86UP9|LHPL3_HUMAN LHFPL tetraspan subfamily member 3 protein OS=Homo sapiens OX=9606 GN=LHFPL3 PE=1 SV=3	132	CNTATVYKICAWMQLTSAACLVLGCMIFPDG
0.15	Q96MT1	sp|Q96MT1|RN145_HUMAN RING finger protein 145 OS=Homo sapiens OX=9606 GN=RNF145 PE=2 SV=2	120	MNRFTTALIGQLVVCTLCSCVMKTKQIWLFS
0.15	Q9H9V4	sp|Q9H9V4|RN122_HUMAN RING finger protein 122 OS=Homo sapiens OX=9606 GN=RNF122 PE=1 SV=2	10	CFCGLGLVSTNKSCSMPPISFQDLPLNIYMV
0.15	P43088	sp|P43088|PF2R_HUMAN Prostaglandin F2-alpha receptor OS=Homo sapiens OX=9606 GN=PTGFR PE=1 SV=1	256	CVSCICWSPFLVTMANIGINGNHSLETCETT
0.15	Q9Y5I0	sp|Q9Y5I0|PCDAD_HUMAN Protocadherin alpha-13 OS=Homo sapiens OX=9606 GN=PCDHA13 PE=2 SV=1	722	RCSAPPTEGACAPGKPTLVCSSAAGSWSYSQ
0.15	P25116	sp|P25116|PAR1_HUMAN Proteinase-activated receptor 1 OS=Homo sapiens OX=9606 GN=F2R PE=1 SV=2	345	TTEAAYFAYLLCVCVSSISCCIDPLIYYYAS
0.15	Q8NGR6	sp|Q8NGR6|OR1B1_HUMAN Olfactory receptor 1B1 OS=Homo sapiens OX=9606 GN=OR1B1 PE=3 SV=2	126	VAICDPLHYALVMNHQRCACLLALSWVVSIL
0.15	P03999	sp|P03999|OPSB_HUMAN Short-wave-sensitive opsin 1 OS=Homo sapiens OX=9606 GN=OPN1SW PE=1 SV=1	311	QACIMKMVCGKAMTDESDTCSSQKTEVSTVS
0.15	O00398	sp|O00398|P2Y10_HUMAN Putative P2Y purinoceptor 10 OS=Homo sapiens OX=9606 GN=P2RY10 PE=2 SV=1	120	SICFLTCISLQRCFFLLKPFRARDWKRRYDV
0.15	P0DMU2	sp|P0DMU2|OR83P_HUMAN Putative olfactory receptor 8G3 pseudogene OS=Homo sapiens OX=9606 GN=OR8G3P PE=5 SV=1	122	CYVAICSPLLYNVIMSYHHCFWLTVGVYILG
0.15	Q8NHC4	sp|Q8NHC4|O10J5_HUMAN Olfactory receptor 10J5 OS=Homo sapiens OX=9606 GN=OR10J5 PE=2 SV=1	127	CRPLRYTVIMSKGLCAQLVCGSFGIGLTMAV
0.15	Q9H2C5	sp|Q9H2C5|O52A5_HUMAN Olfactory receptor 52A5 OS=Homo sapiens OX=9606 GN=OR52A5 PE=3 SV=1	163	GLIKCCLKHYRTTVISHSYCEHMAIVKLATE
0.15	Q8NGI3	sp|Q8NGI3|O56B1_HUMAN Olfactory receptor 56B1 OS=Homo sapiens OX=9606 GN=OR56B1 PE=2 SV=2	169	PVLAAQRDYCSKNEIEHCLCSNLGVTSLACD
0.15	Q8NGF1	sp|Q8NGF1|O52R1_HUMAN Olfactory receptor 52R1 OS=Homo sapiens OX=9606 GN=OR52R1 PE=3 SV=2	163	CFMVSRMPFCQHQAIPQSYCEHMAVLKLVCA
0.15	Q8NGX3	sp|Q8NGX3|O10T2_HUMAN Olfactory receptor 10T2 OS=Homo sapiens OX=9606 GN=OR10T2 PE=3 SV=1	161	TNLICDMRFCGPNRVNHYFCDMAPVIKLACT
0.15	Q9BQI7	sp|Q9BQI7|PSD2_HUMAN PH and SEC7 domain-containing protein 2 OS=Homo sapiens OX=9606 GN=PSD2 PE=2 SV=3	639	MKKFCRPLLPSCTTRLCQEEQLRSHENKLRQ
0.15	Q8NGS0	sp|Q8NGS0|OR1N1_HUMAN Olfactory receptor 1N1 OS=Homo sapiens OX=9606 GN=OR1N1 PE=3 SV=1	120	RYVAICHPLCYSTVMRPQVCALMLALCWVLT
0.15	Q8NG98	sp|Q8NG98|OR7D4_HUMAN Olfactory receptor 7D4 OS=Homo sapiens OX=9606 GN=OR7D4 PE=1 SV=1	122	RFVAICHPLHYTVIMNPCLCGLLVLASWFII
0.15	Q13585	sp|Q13585|MTR1L_HUMAN Melatonin-related receptor OS=Homo sapiens OX=9606 GN=GPR50 PE=1 SV=3	127	YCYICHSLQYERIFSVRNTCIYLVITWIMTV
0.15	A6NM62	sp|A6NM62|LRC53_HUMAN Leucine-rich repeat-containing protein 53 OS=Homo sapiens OX=9606 GN=LRRC53 PE=4 SV=2	322	KANEHTSENLCCRTFDEPLCAHEARNYHTKG
0.15	P48039	sp|P48039|MTR1A_HUMAN Melatonin receptor type 1A OS=Homo sapiens OX=9606 GN=MTNR1A PE=1 SV=1	127	CYICHSLKYDKLYSSKNSLCYVLLIWLLTLA
0.15	Q08554	sp|Q08554|DSC1_HUMAN Desmocollin-1 OS=Homo sapiens OX=9606 GN=DSC1 PE=1 SV=2	662	VRVCDCSTPSECRMKDKSTRDVRPNVILGRW
0.15	O43306	sp|O43306|ADCY6_HUMAN Adenylate cyclase type 6 OS=Homo sapiens OX=9606 GN=ADCY6 PE=1 SV=2	672	YVACALLVFCFICFIQLLIFPHSTLMLGIYA
0.15	Q68CR7	sp|Q68CR7|LRC66_HUMAN Leucine-rich repeat-containing protein 66 OS=Homo sapiens OX=9606 GN=LRRC66 PE=2 SV=1	33	NSECQWNEYILTNCSFTGKCDIPVDISQTAA
0.15	P11168	sp|P11168|GTR2_HUMAN Solute carrier family 2	facilitated glucose transporter member 2 OS=Homo sapiens OX=9606 GN=SLC2A2 PE=1 SV=1	442
0.15	Q9UJ42	sp|Q9UJ42|GP160_HUMAN Probable G-protein coupled receptor 160 OS=Homo sapiens OX=9606 GN=GPR160 PE=2 SV=1	115	TACIDYCLNFSKTTKLSFKCQKLFYFFTVIL
0.15	Q8WW43	sp|Q8WW43|APH1B_HUMAN Gamma-secretase subunit APH-1B OS=Homo sapiens OX=9606 GN=APH1B PE=1 SV=3	233	GSCRSLKLCLLCQDKNFLLYNQRSR
0.15	Q8NBQ7	sp|Q8NBQ7|AQP11_HUMAN Aquaporin-11 OS=Homo sapiens OX=9606 GN=AQP11 PE=1 SV=1	41	RPVAHAFVLEFLATFQLCCCTHELQLLSEQH
0.15	Q5T700	sp|Q5T700|LRAD1_HUMAN Low-density lipoprotein receptor class A domain-containing protein 1 OS=Homo sapiens OX=9606 GN=LDLRAD1 PE=1 SV=1	19	AHPGGEAGGGHLCCSRRGACLSASLLLLLAT
0.15	P21918	sp|P21918|DRD5_HUMAN D(1B) dopamine receptor OS=Homo sapiens OX=9606 GN=DRD5 PE=1 SV=2	113	CDVWVAFDIMCSTASILNLCVISVDRYWAIS
0.15	Q13571	sp|Q13571|LAPM5_HUMAN Lysosomal-associated transmembrane protein 5 OS=Homo sapiens OX=9606 GN=LAPTM5 PE=1 SV=1	204	YMFKCVWRCYRLIKCMNSVEEKRNSKMLQKV
0.15	Q6ZUX7	sp|Q6ZUX7|LHPL2_HUMAN LHFPL tetraspan subfamily member 2 protein OS=Homo sapiens OX=9606 GN=LHFPL2 PE=1 SV=2	160	CQKAIDYCGHYASAYKPGDCSLGWAFYTAIG
0.15	Q9Y5U4	sp|Q9Y5U4|INSI2_HUMAN Insulin-induced gene 2 protein OS=Homo sapiens OX=9606 GN=INSIG2 PE=1 SV=2	74	PPCCGTASAVIGLLYPCIDRHLGEPHKFKRE
0.15	Q4VC39	sp|Q4VC39|HIG2B_HUMAN Putative HIG1 domain family member 2B OS=Homo sapiens OX=9606 GN=HIGD2B PE=5 SV=1	55	CTAAVLTNGLYCFHQGNSQCSRLMMHTQIAA
0.15	Q13467	sp|Q13467|FZD5_HUMAN Frizzled-5 OS=Homo sapiens OX=9606 GN=FZD5 PE=1 SV=2	521	IWSGKTVESWRRFTSRCCCRPRRGHKSGGAM
0.15	O75899	sp|O75899|GABR2_HUMAN Gamma-aminobutyric acid type B receptor subunit 2 OS=Homo sapiens OX=9606 GN=GABBR2 PE=1 SV=1	718	NVQFCIVALVIIFCSTITLCLVFVPKLITLR
0.15	Q5NUL3	sp|Q5NUL3|FFAR4_HUMAN Free fatty acid receptor 4 OS=Homo sapiens OX=9606 GN=FFAR4 PE=1 SV=3	317	NPILYNMTLCRNEWKKIFCCFWFPEKGAILT
0.15	O14944	sp|O14944|EREG_HUMAN Proepiregulin OS=Homo sapiens OX=9606 GN=EREG PE=1 SV=1	90	NYCRCEVGYTGVRCEHFFLTVHQPLSKEYVA
0.15	P18825	sp|P18825|ADA2C_HUMAN Alpha-2C adrenergic receptor OS=Homo sapiens OX=9606 GN=ADRA2C PE=1 SV=2	124	CGVYLALDVLFCTSSIVHLCAISLDRYWSVT
0.15	P20309	sp|P20309|ACM3_HUMAN Muscarinic acetylcholine receptor M3 OS=Homo sapiens OX=9606 GN=CHRM3 PE=1 SV=1	514	NTFCDSCIPKTFWNLGYWLCYINSTVNPVCY
0.15	Q8TDD5	sp|Q8TDD5|MCLN3_HUMAN Mucolipin-3 OS=Homo sapiens OX=9606 GN=MCOLN3 PE=1 SV=1	399	NLLILTLQAALPNVIRFCCCAAMIYLGYCFC
0.15	P36888	sp|P36888|FLT3_HUMAN Receptor-type tyrosine-protein kinase FLT3 OS=Homo sapiens OX=9606 GN=FLT3 PE=1 SV=2	514	CCAYNSLGTSCETILLNSPGPFPFIQDNISF
0.15	A6NNE9	sp|A6NNE9|MARHB_HUMAN E3 ubiquitin-protein ligase MARCHF11 OS=Homo sapiens OX=9606 GN=MARCHF11 PE=2 SV=3	215	CCYRYHVIAIKMKQPCQWQSISITLVEKVQM
0.15	P22459	sp|P22459|KCNA4_HUMAN Potassium voltage-gated channel subfamily A member 4 OS=Homo sapiens OX=9606 GN=KCNA4 PE=1 SV=2	374	VETVCIVWFSFEFVVRCFACPSQALFFKNIM
0.15	Q8NDV2	sp|Q8NDV2|GPR26_HUMAN G-protein coupled receptor 26 OS=Homo sapiens OX=9606 GN=GPR26 PE=1 SV=1	189	CCTYLKVLKVARFHCKRIDVITMQTLVLLVD
0.15	Q8WTR4	sp|Q8WTR4|GDPD5_HUMAN Glycerophosphodiester phosphodiesterase domain-containing protein 5 OS=Homo sapiens OX=9606 GN=GDPD5 PE=1 SV=2	13	QLCLSCLTGIYGCRWKRYQRSHDDTTPWERL
0.15	Q8N3F9	sp|Q8N3F9|G137C_HUMAN Integral membrane protein GPR137C OS=Homo sapiens OX=9606 GN=GPR137C PE=2 SV=2	138	TLCLLNLYLAEVICKVRCATELDRHKILLHL
0.15	Q9UBQ6	sp|Q9UBQ6|EXTL2_HUMAN Exostosin-like 2 OS=Homo sapiens OX=9606 GN=EXTL2 PE=1 SV=1	1	MRCCHICKLPGRVMGIRVLRLSLVVILVLLL
0.15	P32926	sp|P32926|DSG3_HUMAN Desmoglein-3 OS=Homo sapiens OX=9606 GN=DSG3 PE=1 SV=2	586	VCQCDNRGICGTSYPTTSPGTRYGRPHSGRL
0.15	Q9NPB9	sp|Q9NPB9|ACKR4_HUMAN Atypical chemokine receptor 4 OS=Homo sapiens OX=9606 GN=ACKR4 PE=1 SV=1	141	VTKVPSQSGVGKPCWIICFCVWMAAILLSIP
0.15	O95907	sp|O95907|MOT3_HUMAN Monocarboxylate transporter 3 OS=Homo sapiens OX=9606 GN=SLC16A8 PE=2 SV=1	171	FGWRGGFLLLGGLLLHCCACGAVMRPPPGPG
0.15	Q8WUT4	sp|Q8WUT4|LRRN4_HUMAN Leucine-rich repeat neuronal protein 4 OS=Homo sapiens OX=9606 GN=LRRN4 PE=1 SV=3	700	VLSACLCRRGQTLGLQRCDTHLVAYKNPAFD
0.15	Q9Y561	sp|Q9Y561|LRP12_HUMAN Low-density lipoprotein receptor-related protein 12 OS=Homo sapiens OX=9606 GN=LRP12 PE=1 SV=1	463	CVFESWVCDSQDDCGDGSDEENCPVIVPTRV
0.15	Q96T54	sp|Q96T54|KCNKH_HUMAN Potassium channel subfamily K member 17 OS=Homo sapiens OX=9606 GN=KCNK17 PE=2 SV=1	264	LSQLETPGRVCSCCHHSSKEDFKSQSWRQGP
0.15	P60893	sp|P60893|GPR85_HUMAN Probable G-protein coupled receptor 85 OS=Homo sapiens OX=9606 GN=GPR85 PE=1 SV=1	54	APYYFLLDLCCSDILRSAICFPFVFNSVKNG
0.15	Q8IZP9	sp|Q8IZP9|AGRG2_HUMAN Adhesion G-protein coupled receptor G2 OS=Homo sapiens OX=9606 GN=ADGRG2 PE=1 SV=2	878	FYCVAKENVRKQWRRYLCCGKLRLAENSDWS
0.15	Q86WK6	sp|Q86WK6|AMGO1_HUMAN Amphoterin-induced protein 1 OS=Homo sapiens OX=9606 GN=AMIGO1 PE=1 SV=1	393	LTPCRCWCRGVEKPSSHQGDSLSSSMLSTTP
0.15	Q96LB2	sp|Q96LB2|MRGX1_HUMAN Mas-related G-protein coupled receptor member X1 OS=Homo sapiens OX=9606 GN=MRGPRX1 PE=1 SV=1	173	CQTSDFITVAWLIFLCVVLCGSSLVLLIRIL
0.15	Q8TF71	sp|Q8TF71|MOT10_HUMAN Monocarboxylate transporter 10 OS=Homo sapiens OX=9606 GN=SLC16A10 PE=1 SV=1	122	MGMIFFCCPIVSVFTDLFGCRKTAVVGAAVG
0.15	Q5T6X5	sp|Q5T6X5|GPC6A_HUMAN G-protein coupled receptor family C group 6 member A OS=Homo sapiens OX=9606 GN=GPRC6A PE=1 SV=1	657	FTCKTRQTMFGVSFTLCISCILTKSLKILLA
0.15	Q01362	sp|Q01362|FCERB_HUMAN High affinity immunoglobulin epsilon receptor subunit beta OS=Homo sapiens OX=9606 GN=MS4A2 PE=1 SV=1	68	TAMICLCFGTVVCSVLDISHIEGDIFSSFKA
0.15	Q92838	sp|Q92838|EDA_HUMAN Ectodysplasin-A OS=Homo sapiens OX=9606 GN=EDA PE=1 SV=2	21	GSQGCGCGGAPARAGEGNSCLLFLGFFGLSL
0.15	Q07954	sp|Q07954|LRP1_HUMAN Prolow-density lipoprotein receptor-related protein 1 OS=Homo sapiens OX=9606 GN=LRP1 PE=1 SV=2	4390	NSKMMPECQCPPHMTGPRCEEHVFSQQQPGH
0.15	P22732	sp|P22732|GTR5_HUMAN Solute carrier family 2	facilitated glucose transporter member 5 OS=Homo sapiens OX=9606 GN=SLC2A5 PE=1 SV=1	338
0.15	P53985	sp|P53985|MOT1_HUMAN Monocarboxylate transporter 1 OS=Homo sapiens OX=9606 GN=SLC16A1 PE=1 SV=3	87	IVMIVGGCLSGCGLIAASFCNTVQQLYVCIG
0.15	Q6N075	sp|Q6N075|MFSD5_HUMAN Molybdate-anion transporter OS=Homo sapiens OX=9606 GN=MFSD5 PE=1 SV=2	14	ASCLGLELSRCRAKPPGRACSNPSFLRFQLD
0.15	P32245	sp|P32245|MC4R_HUMAN Melanocortin receptor 4 OS=Homo sapiens OX=9606 GN=MC4R PE=1 SV=2	271	CPQNPYCVCFMSHFNLYLILIMCNSIIDPLI
0.15	Q7Z4F1	sp|Q7Z4F1|LRP10_HUMAN Low-density lipoprotein receptor-related protein 10 OS=Homo sapiens OX=9606 GN=LRP10 PE=1 SV=2	411	CVYETWVCDGQPDCADGSDEWDCSYVLPRKV
0.15	Q8TDN2	sp|Q8TDN2|KCNV2_HUMAN Potassium voltage-gated channel subfamily V member 2 OS=Homo sapiens OX=9606 GN=KCNV2 PE=1 SV=1	183	EELGYWGVRLKYTPRCCRICFEERRDELSER
0.15	O15503	sp|O15503|INSI1_HUMAN Insulin-induced gene 1 protein OS=Homo sapiens OX=9606 GN=INSIG1 PE=1 SV=3	130	PPCCGTAAAVVGLLYPCIDSHLGEPHKFKRE
0.15	Q9Y2T6	sp|Q9Y2T6|GPR55_HUMAN G-protein coupled receptor 55 OS=Homo sapiens OX=9606 GN=GPR55 PE=1 SV=2	263	KQSISFFLQLSMCFSNVNCCLDVFCYYFVIK
0.15	Q9NS67	sp|Q9NS67|GPR27_HUMAN Probable G-protein coupled receptor 27 OS=Homo sapiens OX=9606 GN=GPR27 PE=2 SV=1	341	FNRELRDCFRAQFPCCQSPRTTQATHPCDLK
0.15	Q96Q04	sp|Q96Q04|LMTK3_HUMAN Serine/threonine-protein kinase LMTK3 OS=Homo sapiens OX=9606 GN=LMTK3 PE=1 SV=2	61	CCKRGDVGFKEFENPEGEDCSGEYTPPAEET
0.15	P23276	sp|P23276|KELL_HUMAN Kell blood group glycoprotein OS=Homo sapiens OX=9606 GN=KEL PE=1 SV=2	67	YNFQNCGPRPCETSVCLDLRDHYLASGNTSV
0.15	P04035	sp|P04035|HMDH_HUMAN 3-hydroxy-3-methylglutaryl-coenzyme A reductase OS=Homo sapiens OX=9606 GN=HMGCR PE=1 SV=1	181	VGTMSGVRQLEIMCCFGCMSVLANYFVFMTF
0.15	P78334	sp|P78334|GBRE_HUMAN Gamma-aminobutyric acid receptor subunit epsilon OS=Homo sapiens OX=9606 GN=GABRE PE=2 SV=2	456	YFCMVPDCEGSTWQQGRLCIHVYRLDNYSRV
0.15	Q9BVK2	sp|Q9BVK2|ALG8_HUMAN Probable dolichyl pyrophosphate Glc1Man9GlcNAc2 alpha-1	3-glucosyltransferase OS=Homo sapiens OX=9606 GN=ALG8 PE=1 SV=2	122
0.15	Q8IZ96	sp|Q8IZ96|CKLF1_HUMAN CKLF-like MARVEL transmembrane domain-containing protein 1 OS=Homo sapiens OX=9606 GN=CMTM1 PE=2 SV=1	105	RRHLLYVGGSLCLTAVIVCCIDAFVVTTKMR
0.15	P33151	sp|P33151|CADH5_HUMAN Cadherin-5 OS=Homo sapiens OX=9606 GN=CDH5 PE=1 SV=5	570	TLTVAVCKCNEQGEFTFCEDMAAQVGVSIQA
0.15	P18089	sp|P18089|ADA2B_HUMAN Alpha-2B adrenergic receptor OS=Homo sapiens OX=9606 GN=ADRA2B PE=1 SV=4	382	LCWFPFFFSYSLGAICPKHCKVPHGLFQFFF
0.15	P37023	sp|P37023|ACVL1_HUMAN Serine/threonine-protein kinase receptor R3 OS=Homo sapiens OX=9606 GN=ACVRL1 PE=1 SV=2	89	CCDSHLCNHNVSLVLEATQPPSEQPGTDGQL
0.15	P19022	sp|P19022|CADH2_HUMAN Cadherin-2 OS=Homo sapiens OX=9606 GN=CDH2 PE=1 SV=4	695	ILRVKVCQCDSNGDCTDVDRIVGAGLGTGAI
0.15	Q9Y6K0	sp|Q9Y6K0|CEPT1_HUMAN Choline/ethanolaminephosphotransferase 1 OS=Homo sapiens OX=9606 GN=CEPT1 PE=1 SV=1	107	CPTATEQAPLWAYIACACGLFIYQSLDAIDG
0.15	P55285	sp|P55285|CADH6_HUMAN Cadherin-6 OS=Homo sapiens OX=9606 GN=CDH6 PE=1 SV=1	586	VRVCACDHHGNMQSCHAEALIHPTGLSTGAL
0.15	P36894	sp|P36894|BMR1A_HUMAN Bone morphogenetic protein receptor type-1A OS=Homo sapiens OX=9606 GN=BMPR1A PE=1 SV=2	123	ECCRTNLCNQYLQPTLPPVVIGPFFDGSIRW
0.15	Q9P003	sp|Q9P003|CNIH4_HUMAN Protein cornichon homolog 4 OS=Homo sapiens OX=9606 GN=CNIH4 PE=1 SV=1	25	ITLSDLECDYINARSCCSKLNKWVIPELIGH
0.15	O15551	sp|O15551|CLD3_HUMAN Claudin-3 OS=Homo sapiens OX=9606 GN=CLDN3 PE=1 SV=1	180	LCCSCPPREKKYTATKVVYSAPRSTGPGASL
0.15	P41180	sp|P41180|CASR_HUMAN Extracellular calcium-sensing receptor OS=Homo sapiens OX=9606 GN=CASR PE=1 SV=3	675	WTCRLRQPAFGISFVLCISCILVKTNRVLLV
0.15	Q9H159	sp|Q9H159|CAD19_HUMAN Cadherin-19 OS=Homo sapiens OX=9606 GN=CDH19 PE=2 SV=1	567	TIHVCDCGDSGSTQTCQYQELVLSMGFKTEV
0.15	P11229	sp|P11229|ACM1_HUMAN Muscarinic acetylcholine receptor M1 OS=Homo sapiens OX=9606 GN=CHRM1 PE=1 SV=2	388	STFCKDCVPETLWELGYWLCYVNSTINPMCY
0.15	P82279	sp|P82279|CRUM1_HUMAN Protein crumbs homolog 1 OS=Homo sapiens OX=9606 GN=CRB1 PE=1 SV=2	1318	KFQCLCDVAFAGERCEVDLADDLISDIFTTI
0.15	P35070	sp|P35070|BTC_HUMAN Probetacellulin OS=Homo sapiens OX=9606 GN=BTC PE=1 SV=1	89	QTPSCVCDEGYIGARCERVDLFYLRGDRGQI
0.15	P16615	sp|P16615|AT2A2_HUMAN Sarcoplasmic/endoplasmic reticulum calcium ATPase 2 OS=Homo sapiens OX=9606 GN=ATP2A2 PE=1 SV=1	991	LEPGKECVQPATKSCSFSACTDGISWPFVLL
0.15	Q6UW56	sp|Q6UW56|ARAID_HUMAN All-trans retinoic acid-induced differentiation factor OS=Homo sapiens OX=9606 GN=ATRAID PE=1 SV=2	170	SCVPDGPGLLQCVCADGFHGYKCMRQGSFSL
0.15	Q92685	sp|Q92685|ALG3_HUMAN Dol-P-Man:Man(5)GlcNAc(2)-PP-Dol alpha-1	3-mannosyltransferase OS=Homo sapiens OX=9606 GN=ALG3 PE=1 SV=1	143
0.15	Q15822	sp|Q15822|ACHA2_HUMAN Neuronal acetylcholine receptor subunit alpha-2 OS=Homo sapiens OX=9606 GN=CHRNA2 PE=1 SV=2	274	IPCLLISCLTVLVFYLPSDCGEKITLCISVL
0.15	P56747	sp|P56747|CLD6_HUMAN Claudin-6 OS=Homo sapiens OX=9606 GN=CLDN6 PE=1 SV=2	181	LCCTCPSGGSQGPSHYMARYSTSAPAISRGP
0.15	Q9NTQ9	sp|Q9NTQ9|CXB4_HUMAN Gap junction beta-4 protein OS=Homo sapiens OX=9606 GN=GJB4 PE=1 SV=1	45	DDEQKDFVCNTKQPGCPNVCYDEFFPVSHVR
0.15	Q8NHS1	sp|Q8NHS1|CLDN2_HUMAN Claudin domain-containing protein 2 OS=Homo sapiens OX=9606 GN=CLDND2 PE=1 SV=1	36	EGHSGLWQECNHGICSSIPCQTTLAVTVACM
0.15	Q86UP0	sp|Q86UP0|CAD24_HUMAN Cadherin-24 OS=Homo sapiens OX=9606 GN=CDH24 PE=1 SV=1	612	VSVCRCQPDGSVASCWPEAHLSAAGLSTGAL
0.15	Q08462	sp|Q08462|ADCY2_HUMAN Adenylate cyclase type 2 OS=Homo sapiens OX=9606 GN=ADCY2 PE=1 SV=5	598	PAFKYYVTCACLIFFCIFIVQILVLPKTSVL
0.15	Q9H2U9	sp|Q9H2U9|ADAM7_HUMAN Disintegrin and metalloproteinase domain-containing protein 7 OS=Homo sapiens OX=9606 GN=ADAM7 PE=1 SV=3	641	PVDGHGLQCHCEEGQAPVACEETLHVTNITI
0.15	Q9HCU0	sp|Q9HCU0|CD248_HUMAN Endosialin OS=Homo sapiens OX=9606 GN=CD248 PE=1 SV=1	708	VYCTRCGPHAPNKRITDCYRWVIHAGSKSPT
0.15	Q86SJ2	sp|Q86SJ2|AMGO2_HUMAN Amphoterin-induced protein 2 OS=Homo sapiens OX=9606 GN=AMIGO2 PE=1 SV=1	419	LTPCPCKCKTKRQKNMLHQSNAHSSILSPGP
0.15	Q5T7M9	sp|Q5T7M9|DIK1A_HUMAN Divergent protein kinase domain 1A OS=Homo sapiens OX=9606 GN=DIPK1A PE=2 SV=1	48	STYTELCRGKDCKKIICDKYKTGVIDGPACN
0.15	P04839	sp|P04839|CY24B_HUMAN Cytochrome b-245 heavy chain OS=Homo sapiens OX=9606 GN=CYBB PE=1 SV=2	69	LPVCRNLLSFLRGSSACCSTRVRRQLDRNLT
0.15	O60242	sp|O60242|AGRB3_HUMAN Adhesion G protein-coupled receptor B3 OS=Homo sapiens OX=9606 GN=ADGRB3 PE=1 SV=2	1146	VHCILRREVQDAFRCRLRNCQDPINADSSSS
0.15	Q6PIV7	sp|Q6PIV7|S2534_HUMAN Solute carrier family 25 member 34 OS=Homo sapiens OX=9606 GN=SLC25A34 PE=2 SV=1	15	SACCLACVFTNPLEVVKTRLQLQGELQARGT
0.15	P0CK97	sp|P0CK97|S35E2_HUMAN Solute carrier family 35 member E2A OS=Homo sapiens OX=9606 GN=SLC35E2A PE=1 SV=1	109	AVQMLSTTVIGCVKTLVPCCLYQHKARLSYP
0.15	Q8N4L2	sp|Q8N4L2|PP4P2_HUMAN Type 2 phosphatidylinositol 4	5-bisphosphate 4-phosphatase OS=Homo sapiens OX=9606 GN=PIP4P2 PE=1 SV=1	173
0.15	Q96FX8	sp|Q96FX8|PERP_HUMAN p53 apoptosis effector related to PMP-22 OS=Homo sapiens OX=9606 GN=PERP PE=1 SV=1	81	LFCGFIILVICFILSFFALCGPQMLVFLRVI
0.15	Q13370	sp|Q13370|PDE3B_HUMAN cGMP-inhibited 3'	5'-cyclic phosphodiesterase B OS=Homo sapiens OX=9606 GN=PDE3B PE=1 SV=2	115
0.15	Q7Z3T1	sp|Q7Z3T1|OR2W3_HUMAN Olfactory receptor 2W3 OS=Homo sapiens OX=9606 GN=OR2W3 PE=2 SV=2	122	RCVAICKPLHYMVIMNPRLCRGLVSVTWGCG
0.15	Q8NH54	sp|Q8NH54|O56A3_HUMAN Olfactory receptor 56A3 OS=Homo sapiens OX=9606 GN=OR56A3 PE=3 SV=2	164	PILSAQLRYCGRNVIENCICANMSVSRLSCD
0.15	Q9Y4A9	sp|Q9Y4A9|O10H1_HUMAN Olfactory receptor 10H1 OS=Homo sapiens OX=9606 GN=OR10H1 PE=2 SV=1	124	VAICHPLRYNVLMSPRGCACLVGCSWAGGLV
0.15	Q8NGB6	sp|Q8NGB6|OR4M2_HUMAN Olfactory receptor 4M2 OS=Homo sapiens OX=9606 GN=OR4M2 PE=2 SV=2	123	YTAICRPLHYATIMNQRLCCILVALSWRGGF
0.15	Q8NH01	sp|Q8NH01|O2T11_HUMAN Olfactory receptor 2T11 OS=Homo sapiens OX=9606 GN=OR2T11 PE=2 SV=1	119	CYVAVCNPLRYPVLMNRKKCLLLAAGAWFGG
0.15	Q96CE8	sp|Q96CE8|T4S18_HUMAN Transmembrane 4 L6 family member 18 OS=Homo sapiens OX=9606 GN=TM4SF18 PE=1 SV=1	70	LENNNNYKCCQSENCSKKYVTLLSIIFSSLG
0.15	Q96JX3	sp|Q96JX3|SRAC1_HUMAN Protein SERAC1 OS=Homo sapiens OX=9606 GN=SERAC1 PE=1 SV=1	2	SLAAYCVICCRRIGTSTSPPKSGTHWRDIRN
0.15	Q7Z2H8	sp|Q7Z2H8|S36A1_HUMAN Proton-coupled amino acid transporter 1 OS=Homo sapiens OX=9606 GN=SLC36A1 PE=1 SV=1	368	EHCELVVDLFVRTVLVCLTCILAILIPRLDL
0.15	P0C7Q6	sp|P0C7Q6|S35G6_HUMAN Solute carrier family 35 member G6 OS=Homo sapiens OX=9606 GN=SLC35G6 PE=2 SV=1	141	CSAVLTLCLESQGLSGYDWCGLLGSILGLII
0.15	Q8NBW4	sp|Q8NBW4|S38A9_HUMAN Sodium-coupled neutral amino acid transporter 9 OS=Homo sapiens OX=9606 GN=SLC38A9 PE=1 SV=2	146	GFTTGMCVIILMGLLTLYCCYRVVKSRTMMF
0.15	Q8IY34	sp|Q8IY34|S15A3_HUMAN Solute carrier family 15 member 3 OS=Homo sapiens OX=9606 GN=SLC15A3 PE=1 SV=2	129	SFCGEMPASPLGPACPSAGCPRSSPSPYCAP
0.15	Q8NH94	sp|Q8NH94|OR1L1_HUMAN Olfactory receptor 1L1 OS=Homo sapiens OX=9606 GN=OR1L1 PE=3 SV=3	172	RYVAICNPFHYITIMSHRCCVLLLVLSFCIP
0.15	Q9ULQ1	sp|Q9ULQ1|TPC1_HUMAN Two pore calcium channel protein 1 OS=Homo sapiens OX=9606 GN=TPCN1 PE=1 SV=3	198	VRVTRALRCIFLVDCRYCGGVRRNLRQIFQS
0.15	Q24JQ0	sp|Q24JQ0|TM241_HUMAN Transmembrane protein 241 OS=Homo sapiens OX=9606 GN=TMEM241 PE=1 SV=1	2	CVRRSLVGLTFCTCYLASYLTNKYVLSVLKF
0.15	Q9H0V1	sp|Q9H0V1|TM168_HUMAN Transmembrane protein 168 OS=Homo sapiens OX=9606 GN=TMEM168 PE=2 SV=2	666	CKTCFRCLKRLKMSWFLPTVLDTGQGFKLVK
0.15	Q96RJ0	sp|Q96RJ0|TAAR1_HUMAN Trace amine-associated receptor 1 OS=Homo sapiens OX=9606 GN=TAAR1 PE=2 SV=1	258	GVFLICWCPFFICTVMDPFLHYIIPPTLNDV
0.15	Q9UQD0	sp|Q9UQD0|SCN8A_HUMAN Sodium channel protein type 8 subunit alpha OS=Homo sapiens OX=9606 GN=SCN8A PE=1 SV=1	893	GMQLFGKSYKECVCKINQDCELPRWHMHDFF
0.15	O00337	sp|O00337|S28A1_HUMAN Sodium/nucleoside cotransporter 1 OS=Homo sapiens OX=9606 GN=SLC28A1 PE=1 SV=2	181	SFAGICVFVALLFACSKHHCAVSWRAVSWGL
0.15	P21453	sp|P21453|S1PR1_HUMAN Sphingosine 1-phosphate receptor 1 OS=Homo sapiens OX=9606 GN=S1PR1 PE=1 SV=2	268	CWAPLFILLLLDVGCKVKTCDILFRAEYFLV
0.15	Q71RH2	sp|Q71RH2|TLC3B_HUMAN Ceramide synthase OS=Homo sapiens OX=9606 GN=TLCD3B PE=2 SV=1	251	LICRGACRLFWPRSRPPPACQAQD
0.15	A0A087WTH1	sp|A0A087WTH1|TM265_HUMAN Transmembrane protein 265 OS=Homo sapiens OX=9606 GN=TMEM265 PE=3 SV=1	13	NTEAAHPPSPIRCCWLRLRCLAATSIICGCS
0.15	Q6ZRR5	sp|Q6ZRR5|TLCD5_HUMAN TLC domain-containing protein 5 OS=Homo sapiens OX=9606 GN=TLCD5 PE=2 SV=2	8	QVLCSLCGWLSLYISFCHLNKHRSYEWSCRL
0.15	Q5SV17	sp|Q5SV17|TM240_HUMAN Transmembrane protein 240 OS=Homo sapiens OX=9606 GN=TMEM240 PE=1 SV=2	34	FHNYILPHLRGEDRVCHCNCGRHHIHYVIPY
0.15	Q9P0T7	sp|Q9P0T7|TMEM9_HUMAN Proton-transporting V-type ATPase complex assembly regulator TMEM9 OS=Homo sapiens OX=9606 GN=TMEM9 PE=1 SV=1	60	EPMPVPGHDVEAYCLLCECRYEERSTTTIKV
0.15	P0C7Q5	sp|P0C7Q5|S35G4_HUMAN Putative solute carrier family 35 member G4 OS=Homo sapiens OX=9606 GN=SLC35G4 PE=5 SV=1	141	CSAILTLCLESQVLSGYDWCGLLGSILGLII
0.15	Q9BYT1	sp|Q9BYT1|S17A9_HUMAN Solute carrier family 17 member 9 OS=Homo sapiens OX=9606 GN=SLC17A9 PE=1 SV=2	34	TCLLYCARSSMPICTVSMSQDFGWNKKEAGI
0.15	P18577	sp|P18577|RHCE_HUMAN Blood group Rh(CE) polypeptide OS=Homo sapiens OX=9606 GN=RHCE PE=1 SV=2	307	GGAKCLPVCCNRVLGIHHISVMHSIFSLLGL
0.15	Q7RTM1	sp|Q7RTM1|OTOP1_HUMAN Proton channel OTOP1 OS=Homo sapiens OX=9606 GN=OTOP1 PE=2 SV=1	241	ITTVLDDHTPQCNCTPPTLCTAISHGIYYLY
0.15	Q8NH69	sp|Q8NH69|OR5W2_HUMAN Olfactory receptor 5W2 OS=Homo sapiens OX=9606 GN=OR5W2 PE=3 SV=1	160	MTLAFRLCFCGSNEINHFFCDIPPLLLLSRS
0.15	Q8NGC7	sp|Q8NGC7|O11H6_HUMAN Olfactory receptor 11H6 OS=Homo sapiens OX=9606 GN=OR11H6 PE=3 SV=1	145	CRPLHYPSIMTGKFCIILVCVCWVGGFLCYP
0.15	P58182	sp|P58182|O12D2_HUMAN Olfactory receptor 12D2 OS=Homo sapiens OX=9606 GN=OR12D2 PE=2 SV=2	221	TYLFFKTRSCSMLCKALSTCASHFMVVILFY
0.15	Q8NHB7	sp|Q8NHB7|OR5K1_HUMAN Olfactory receptor 5K1 OS=Homo sapiens OX=9606 GN=OR5K1 PE=2 SV=2	56	HTPMYIFLGNLALVDSCCACAITPKMLENFF
0.15	Q9NZP2	sp|Q9NZP2|OR6C2_HUMAN Olfactory receptor 6C2 OS=Homo sapiens OX=9606 GN=OR6C2 PE=3 SV=2	127	PLHYVVIMNNRVCTLLVLCCWVAGLMIIVPP
0.15	Q8NH08	sp|Q8NH08|O10AC_HUMAN Olfactory receptor 10AC1 OS=Homo sapiens OX=9606 GN=OR10AC1 PE=3 SV=2	142	PGLCARLALACCLRGLAVSVGLTVAIFHLPF
0.15	Q9Y6M7	sp|Q9Y6M7|S4A7_HUMAN Sodium bicarbonate cotransporter 3 OS=Homo sapiens OX=9606 GN=SLC4A7 PE=1 SV=2	608	CLASILFLYCACMSPVITFGGLLGEATEGRI
0.15	Q9HBR0	sp|Q9HBR0|S38AA_HUMAN Putative sodium-coupled neutral amino acid transporter 10 OS=Homo sapiens OX=9606 GN=SLC38A10 PE=1 SV=2	27	MPFCFKQCGIVLGALLLVFCSWMTHQSCMFL
0.15	P18405	sp|P18405|S5A1_HUMAN 3-oxo-5-alpha-steroid 4-dehydrogenase 1 OS=Homo sapiens OX=9606 GN=SRD5A1 PE=1 SV=1	107	RGGKPMPLLACTMAIMFCTCNGYLQSRYLSH
0.15	Q9HAS3	sp|Q9HAS3|S28A3_HUMAN Solute carrier family 28 member 3 OS=Homo sapiens OX=9606 GN=SLC28A3 PE=1 SV=1	75	EEMQQKGCLERRYDTVCGFCRKHKTTLRHII
0.15	P22309	sp|P22309|UD11_HUMAN UDP-glucuronosyltransferase 1A1 OS=Homo sapiens OX=9606 GN=UGT1A1 PE=1 SV=1	507	FKCCAYGYRKCLGKKGRVKKAHKSKTH
0.15	Q9BVT8	sp|Q9BVT8|TMUB1_HUMAN Transmembrane and ubiquitin-like domain-containing protein 1 OS=Homo sapiens OX=9606 GN=TMUB1 PE=1 SV=1	165	CVLHCHVSTRVGPPNPPCPPGSEPGPSGLEI
0.15	Q96PB1	sp|Q96PB1|CASD1_HUMAN N-acetylneuraminate 9-O-acetyltransferase OS=Homo sapiens OX=9606 GN=CASD1 PE=1 SV=1	284	MILMNVYCNKILKPVDGSCCQPRPPVTLIQK
0.15	O95415	sp|O95415|BRI3_HUMAN Brain protein I3 OS=Homo sapiens OX=9606 GN=BRI3 PE=1 SV=1	70	NSIVVVGGCPVCRVGVLEDCFTFLGIFLAII
0.15	Q8WXG9	sp|Q8WXG9|AGRV1_HUMAN Adhesion G-protein coupled receptor V1 OS=Homo sapiens OX=9606 GN=ADGRV1 PE=1 SV=2	5911	TSGFICISGLCLAVLSHIFCARYSMFAAKLL
0.15	Q9HD20	sp|Q9HD20|AT131_HUMAN Manganese-transporting ATPase 13A1 OS=Homo sapiens OX=9606 GN=ATP13A1 PE=1 SV=2	960	FTSKLSSIQCICHVIKQGRCTLVTTLQMFKI
0.15	Q12864	sp|Q12864|CAD17_HUMAN Cadherin-17 OS=Homo sapiens OX=9606 GN=CDH17 PE=1 SV=3	758	VSLPVTFCSCVEGSCFRPAGHQTGIPTVGMA
0.15	Q9UJ99	sp|Q9UJ99|CAD22_HUMAN Cadherin-22 OS=Homo sapiens OX=9606 GN=CDH22 PE=2 SV=2	595	LTIRICGCDSSGTIQSCNTTAFVMAASLSPG
0.15	P50895	sp|P50895|BCAM_HUMAN Basal cell adhesion molecule OS=Homo sapiens OX=9606 GN=BCAM PE=1 SV=2	568	FYCVRRKGGPCCRQRREKGAPPPGEPGLSHS
0.15	Q9ULB4	sp|Q9ULB4|CADH9_HUMAN Cadherin-9 OS=Homo sapiens OX=9606 GN=CDH9 PE=2 SV=2	586	IRVCACDNQGNMQSCTAEALILSAGLSTGAL
0.15	P78325	sp|P78325|ADAM8_HUMAN Disintegrin and metalloproteinase domain-containing protein 8 OS=Homo sapiens OX=9606 GN=ADAM8 PE=1 SV=2	626	KQECHCHAGWAPPHCAKLLTEVHAASGSLPV
0.15	Q8N8Q1	sp|Q8N8Q1|C56D1_HUMAN Cytochrome b561 domain-containing protein 1 OS=Homo sapiens OX=9606 GN=CYB561D1 PE=1 SV=1	140	VQALCGLCLLCPRAARVSRVARLKLYHLTCG
0.15	P22223	sp|P22223|CADH3_HUMAN Cadherin-3 OS=Homo sapiens OX=9606 GN=CDH3 PE=1 SV=2	628	EQLTVIRATVCDCHGHVETCPGPWKGGFILP
0.15	P28223	sp|P28223|5HT2A_HUMAN 5-hydroxytryptamine receptor 2A OS=Homo sapiens OX=9606 GN=HTR2A PE=1 SV=2	46	TVDSENRTNLSCEGCLSPSCLSLLHLQEKNW
0.15	P08173	sp|P08173|ACM4_HUMAN Muscarinic acetylcholine receptor M4 OS=Homo sapiens OX=9606 GN=CHRM4 PE=1 SV=2	423	NTFCQSCIPDTVWSIGYWLCYVNSTINPACY
0.15	Q8NFM4	sp|Q8NFM4|ADCY4_HUMAN Adenylate cyclase type 4 OS=Homo sapiens OX=9606 GN=ADCY4 PE=1 SV=1	714	PLISVPYSMHCCTLGFLSCSLFLHMSFELKL
0.15	P51790	sp|P51790|CLCN3_HUMAN H(+)/Cl(-) exchange transporter 3 OS=Homo sapiens OX=9606 GN=CLCN3 PE=1 SV=2	168	NHEQCCWGSNETTFEERDKCPQWKTWAELII
0.1	P25874	sp|P25874|UCP1_HUMAN Mitochondrial brown fat uncoupling protein 1 OS=Homo sapiens OX=9606 GN=UCP1 PE=1 SV=3	206	NILADDVPCHLVSALIAGFCATAMSSPVDVV
0.1	Q9NYZ1	sp|Q9NYZ1|TV23B_HUMAN Golgi apparatus membrane protein TVP23 homolog B OS=Homo sapiens OX=9606 GN=TVP23B PE=1 SV=2	53	LCGLLSSSFITCMVTIILLLSCDFWAVKNVT
0.1	A0PK05	sp|A0PK05|TMM72_HUMAN Transmembrane protein 72 OS=Homo sapiens OX=9606 GN=TMEM72 PE=1 SV=1	61	VAQLLAICFQCQPGSLADRVREKAHWLGCFQ
0.1	Q9H330	sp|Q9H330|TM245_HUMAN Transmembrane protein 245 OS=Homo sapiens OX=9606 GN=TMEM245 PE=1 SV=3	164	CLGSYLGVQVLLVHAATLICRGLDYFSSLWI
0.1	A6NFC5	sp|A6NFC5|TM235_HUMAN Transmembrane protein 235 OS=Homo sapiens OX=9606 GN=TMEM235 PE=2 SV=3	96	VIVVLPLSLVLLVCGWICGLLSSLAQSVSLL
0.1	P59542	sp|P59542|T2R19_HUMAN Taste receptor type 2 member 19 OS=Homo sapiens OX=9606 GN=TAS2R19 PE=1 SV=1	197	LLICSLCKHLKKMRLHSKGSQDPSTKVHIKA
0.1	Q9GZM5	sp|Q9GZM5|YIPF3_HUMAN Protein YIPF3 OS=Homo sapiens OX=9606 GN=YIPF3 PE=1 SV=1	190	TCFGYWLGVSSFIYFLAYLCNAQITMLQMLA
0.1	Q5GH77	sp|Q5GH77|XKR3_HUMAN XK-related protein 3 OS=Homo sapiens OX=9606 GN=XKR3 PE=2 SV=1	365	FGGKTLLNCCDSLIAVQLIISYLLATGFMLL
0.1	P47901	sp|P47901|V1BR_HUMAN Vasopressin V1b receptor OS=Homo sapiens OX=9606 GN=AVPR1B PE=2 SV=1	222	ICHEICKNLKVKTQAWRVGGGGWRTWDRPSP
0.1	Q9Y487	sp|Q9Y487|VPP2_HUMAN V-type proton ATPase 116 kDa subunit a2 OS=Homo sapiens OX=9606 GN=ATP6V0A2 PE=1 SV=2	710	GNHQVEDGCREMACEEFNFGEILMTQVIHSI
0.1	O95183	sp|O95183|VAMP5_HUMAN Vesicle-associated membrane protein 5 OS=Homo sapiens OX=9606 GN=VAMP5 PE=1 SV=1	53	KTTQNLAQKKCWENIRYRICVGLVVVGVLLI
0.1	Q9P2U7	sp|Q9P2U7|VGLU1_HUMAN Vesicular glutamate transporter 1 OS=Homo sapiens OX=9606 GN=SLC17A7 PE=2 SV=1	37	ADGRPVTTQTRDPPVVDCTCFGLPRRYIIAI
0.1	Q6NUT2	sp|Q6NUT2|D19L2_HUMAN Probable C-mannosyltransferase DPY19L2 OS=Homo sapiens OX=9606 GN=DPY19L2 PE=1 SV=2	216	ETKTCWNVTRIEPLNEVQSCEGLGDPACFYV
0.1	Q7Z407	sp|Q7Z407|CSMD3_HUMAN CUB and sushi domain-containing protein 3 OS=Homo sapiens OX=9606 GN=CSMD3 PE=2 SV=3	13	ESKPWEPGKRRCAKCGRLDFILMKKMGIKSG
0.1	P21554	sp|P21554|CNR1_HUMAN Cannabinoid receptor 1 OS=Homo sapiens OX=9606 GN=CNR1 PE=1 SV=1	88	SFKENEENIQCGENFMDIECFMVLNPSQQLA
0.1	Q9NPF2	sp|Q9NPF2|CHSTB_HUMAN Carbohydrate sulfotransferase 11 OS=Homo sapiens OX=9606 GN=CHST11 PE=1 SV=1	37	LHPVMRRNPFGVDICCRKGSRSPLQELYNPI
0.1	P11836	sp|P11836|CD20_HUMAN B-lymphocyte antigen CD20 OS=Homo sapiens OX=9606 GN=MS4A1 PE=1 SV=1	164	IYNCEPANPSEKNSPSTQYCYSIQSLFLGIL
0.1	Q9UKJ8	sp|Q9UKJ8|ADA21_HUMAN Disintegrin and metalloproteinase domain-containing protein 21 OS=Homo sapiens OX=9606 GN=ADAM21 PE=1 SV=2	652	HCGYGWSPPYCQHRGYGGSIDSGPASAKRGV
0.1	Q96KA5	sp|Q96KA5|CLP1L_HUMAN Cleft lip and palate transmembrane protein 1-like protein OS=Homo sapiens OX=9606 GN=CLPTM1L PE=1 SV=1	31	VYTRPCSGDANCIQPYLARRPKLQLSVYTTT
0.1	Q9H6B4	sp|Q9H6B4|CLMP_HUMAN CXADR-like membrane protein OS=Homo sapiens OX=9606 GN=CLMP PE=1 SV=1	206	YQCTAGNEAGKESCVVRVTVQYVQSIGMVAG
0.1	P26842	sp|P26842|CD27_HUMAN CD27 antigen OS=Homo sapiens OX=9606 GN=CD27 PE=1 SV=2	217	YRSNKGESPVEPAEPCHYSCPREEEGSTIPI
0.1	P21854	sp|P21854|CD72_HUMAN B-cell differentiation antigen CD72 OS=Homo sapiens OX=9606 GN=CD72 PE=1 SV=1	73	SWRAVTSPAVGRILPCRTTCLRYLLLGLLLT
0.1	P51686	sp|P51686|CCR9_HUMAN C-C chemokine receptor type 9 OS=Homo sapiens OX=9606 GN=CCR9 PE=1 SV=2	114	FQTFMCKVVNSMYKMNFYSCVLLIMCISVDR
0.1	Q9P241	sp|Q9P241|AT10D_HUMAN Probable phospholipid-transporting ATPase VD OS=Homo sapiens OX=9606 GN=ATP10D PE=2 SV=3	1273	FGAMCVTCNPPSNPYWIMQEHMLDPVFYLVC
0.1	A6NJW9	sp|A6NJW9|CD8B2_HUMAN T-cell surface glycoprotein CD8 beta-2 chain OS=Homo sapiens OX=9606 GN=CD8B2 PE=3 SV=3	149	TLKKRVCRLPRPETQKGPLCSPVTLGLLVAG
0.1	P48509	sp|P48509|CD151_HUMAN CD151 antigen OS=Homo sapiens OX=9606 GN=CD151 PE=1 SV=3	78	GCCATFKERRNLLRLYFILLLIIFLLEIIAG
0.1	O00421	sp|O00421|CCRL2_HUMAN C-C chemokine receptor-like 2 OS=Homo sapiens OX=9606 GN=CCRL2 PE=1 SV=2	103	CKILIGLYFVGLYSETFFNCLLTVQRYLVFL
0.1	Q9H5V8	sp|Q9H5V8|CDCP1_HUMAN CUB domain-containing protein 1 OS=Homo sapiens OX=9606 GN=CDCP1 PE=1 SV=3	688	ICCVKKKKKKTNKGPAVGIYNDNINTEMPRQ
0.1	Q15878	sp|Q15878|CAC1E_HUMAN Voltage-dependent R-type calcium channel subunit alpha-1E OS=Homo sapiens OX=9606 GN=CACNA1E PE=1 SV=3	249	RACFMNNSGILEGFDPPHPCGVQGCPAGYEC
0.1	Q9Y2G3	sp|Q9Y2G3|AT11B_HUMAN Probable phospholipid-transporting ATPase IF OS=Homo sapiens OX=9606 GN=ATP11B PE=1 SV=2	900	CLFSQQTLYDSVYLTLYNICFTSLPILIYSL
0.1	Q86XQ3	sp|Q86XQ3|CTSR3_HUMAN Cation channel sperm-associated protein 3 OS=Homo sapiens OX=9606 GN=CATSPER3 PE=2 SV=1	21	TSVGFCPTFKKFKRNDDECRAFVKRVIMSRF
0.1	P56749	sp|P56749|CLD12_HUMAN Claudin-12 OS=Homo sapiens OX=9606 GN=CLDN12 PE=1 SV=1	58	CARYDGSSDCLMYDTTWYSSVDQLDLRVLQF
0.1	P35523	sp|P35523|CLCN1_HUMAN Chloride channel protein 1 OS=Homo sapiens OX=9606 GN=CLCN1 PE=1 SV=3	89	DSKDEDHYSKCQDCIHRLGQVVRRKLGEDGI
0.1	P41597	sp|P41597|CCR2_HUMAN C-C chemokine receptor type 2 OS=Homo sapiens OX=9606 GN=CCR2 PE=1 SV=1	70	CKKLKCLTDIYLLNLAISDLLFLITLPLWAH
0.1	Q8N5B7	sp|Q8N5B7|CERS5_HUMAN Ceramide synthase 5 OS=Homo sapiens OX=9606 GN=CERS5 PE=1 SV=1	67	FIAKPCALCIGIEDSGPYQAQPNAILEKVFI
0.1	P07766	sp|P07766|CD3E_HUMAN T-cell surface glycoprotein CD3 epsilon chain OS=Homo sapiens OX=9606 GN=CD3E PE=1 SV=2	103	SKPEDANFYLYLRARVCENCMEMDVMSVATI
0.1	Q86VU5	sp|Q86VU5|CMTD1_HUMAN Catechol O-methyltransferase domain-containing protein 1 OS=Homo sapiens OX=9606 GN=COMTD1 PE=1 SV=1	32	GRRCPPWRGRREQCLLPPEDSRLWQYLLSRS
0.1	Q8N350	sp|Q8N350|CBARP_HUMAN Voltage-dependent calcium channel beta subunit-associated regulatory protein OS=Homo sapiens OX=9606 GN=CBARP PE=1 SV=3	66	VLLLCKRCWDVHQRLNRAMEEAEKTTTTYLD
0.1	P32247	sp|P32247|BRS3_HUMAN Bombesin receptor subtype-3 OS=Homo sapiens OX=9606 GN=BRS3 PE=1 SV=1	151	KPLERQPSNAILKTCVKAGCVWIVSMIFALP
0.1	O14983	sp|O14983|AT2A1_HUMAN Sarcoplasmic/endoplasmic reticulum calcium ATPase 1 OS=Homo sapiens OX=9606 GN=ATP2A1 PE=1 SV=1	869	QLTHFMQCTEDNTHFEGIDCEVFEAPEPMTM
0.1	P30556	sp|P30556|AGTR1_HUMAN Type-1 angiotensin II receptor OS=Homo sapiens OX=9606 GN=AGTR1 PE=1 SV=1	270	IIRDCRIADIVDTAMPITICIAYFNNCLNPL
0.1	Q8N139	sp|Q8N139|ABCA6_HUMAN ATP-binding cassette sub-family A member 6 OS=Homo sapiens OX=9606 GN=ABCA6 PE=1 SV=2	1214	LRCMELKCGKKRMRKDPVFRISPQSRDAKPN
0.1	Q6ZPD9	sp|Q6ZPD9|D19L3_HUMAN Probable C-mannosyltransferase DPY19L3 OS=Homo sapiens OX=9606 GN=DPY19L3 PE=2 SV=1	481	MRMKYLWTSHMCVFASFGLCSPEIWELLLKS
0.1	P49238	sp|P49238|CX3C1_HUMAN CX3C chemokine receptor 1 OS=Homo sapiens OX=9606 GN=CX3CR1 PE=1 SV=1	202	LPLLIMSYCYFRIIQTLFSCKNHKKAKAIKL
0.1	Q7Z388	sp|Q7Z388|D19L4_HUMAN Probable C-mannosyltransferase DPY19L4 OS=Homo sapiens OX=9606 GN=DPY19L4 PE=1 SV=1	486	LKYIWIPYVCMLAAFGVCSPELWMTLFKWLR
0.1	Q9HCS2	sp|Q9HCS2|CP4FC_HUMAN Cytochrome P450 4F12 OS=Homo sapiens OX=9606 GN=CYP4F12 PE=1 SV=3	39	YAFYNNCRRLQCFPQPPKRNWFWGHLGLITP
0.1	P17927	sp|P17927|CR1_HUMAN Complement receptor type 1 OS=Homo sapiens OX=9606 GN=CR1 PE=1 SV=3	1946	GSPWSQCQADDRWDPPLAKCTSRTHDALIVG
0.1	P27824	sp|P27824|CALX_HUMAN Calnexin OS=Homo sapiens OX=9606 GN=CANX PE=1 SV=2	502	CCSGKKQTSGMEYKKTDAPQPDVKEEEEEKE
0.1	A8MZ97	sp|A8MZ97|CB074_HUMAN Uncharacterized protein C2orf74 OS=Homo sapiens OX=9606 GN=C2orf74 PE=1 SV=3	35	FLYKCFQGRKGKETKKVPCTDANGGVDCAAA
0.1	Q8IZY2	sp|Q8IZY2|ABCA7_HUMAN Phospholipid-transporting ATPase ABCA7 OS=Homo sapiens OX=9606 GN=ABCA7 PE=1 SV=3	655	LAAACGGLAYFSLYLPYVLCVAWRDRLPAGG
0.1	P56856	sp|P56856|CLD18_HUMAN Claudin-18 OS=Homo sapiens OX=9606 GN=CLDN18 PE=1 SV=1	51	RSCVRQSSGFTECRPYFTILGLPAMLQAVRA
0.1	Q13286	sp|Q13286|CLN3_HUMAN Battenin OS=Homo sapiens OX=9606 GN=CLN3 PE=1 SV=1	321	WYQMLYQAGVFASRSSLRCCRIRFTWALALL
0.1	P19397	sp|P19397|CD53_HUMAN Leukocyte surface antigen CD53 OS=Homo sapiens OX=9606 GN=CD53 PE=1 SV=1	25	CCILGFGIYLLIHNNFGVLFHNLPSLTLGNV
0.1	Q8WXS4	sp|Q8WXS4|CCGL_HUMAN Voltage-dependent calcium channel gamma-like subunit OS=Homo sapiens OX=9606 GN=TMEM37 PE=2 SV=2	45	ICDGHWLLAEDRLFGLWHFCTTTNQTICFRD
0.1	Q06432	sp|Q06432|CCG1_HUMAN Voltage-dependent calcium channel gamma-1 subunit OS=Homo sapiens OX=9606 GN=CACNG1 PE=1 SV=1	38	HMEHHNTTCEAAHFGLWRICTKRIPMDDSKT
0.1	Q9Y679	sp|Q9Y679|AUP1_HUMAN Lipid droplet-regulating VLDL assembly factor AUP1 OS=Homo sapiens OX=9606 GN=AUP1 PE=1 SV=2	51	LVSCALPDSVLRRFVVRTMCAVLGLVARQED
0.1	Q8NCG7	sp|Q8NCG7|DGLB_HUMAN Diacylglycerol lipase-beta OS=Homo sapiens OX=9606 GN=DAGLB PE=1 SV=2	73	VSAIMCVSMRGTICNPGPRKSMSKLLYIRLA
0.1	A6NM45	sp|A6NM45|CLD24_HUMAN Putative claudin-24 OS=Homo sapiens OX=9606 GN=CLDN24 PE=5 SV=2	52	QTCVIQEEVGMQCKDFDSFLALPAELRVSRI
0.1	O95406	sp|O95406|CNIH1_HUMAN Protein cornichon homolog 1 OS=Homo sapiens OX=9606 GN=CNIH1 PE=1 SV=1	102	DPTTIMNADILAYCQKEGWCKLAFYLLAFFY
0.1	Q92903	sp|Q92903|CDS1_HUMAN Phosphatidate cytidylyltransferase 1 OS=Homo sapiens OX=9606 GN=CDS1 PE=1 SV=2	302	QYFVCPVEYRSDVNSFVTECEPSELFQLQTY
0.1	Q9HCU4	sp|Q9HCU4|CELR2_HUMAN Cadherin EGF LAG seven-pass G-type receptor 2 OS=Homo sapiens OX=9606 GN=CELSR2 PE=1 SV=1	2351	CQCNHMTSFAVLMDVSRRENGEILPLKTLTY
0.1	Q8WZ55	sp|Q8WZ55|BSND_HUMAN Barttin OS=Homo sapiens OX=9606 GN=BSND PE=1 SV=1	37	FYAMGSVMVIGGIIWSMCQCYPKITFVPADS
0.1	Q8WY22	sp|Q8WY22|BRI3B_HUMAN BRI3-binding protein OS=Homo sapiens OX=9606 GN=BRI3BP PE=1 SV=1	170	CVYILHKYEGEPENAVLPLCFVVAVYFMTGP
0.1	Q96GE9	sp|Q96GE9|DMAC1_HUMAN Distal membrane-arm assembly complex protein 1 OS=Homo sapiens OX=9606 GN=DMAC1 PE=1 SV=1	31	TPGAPTSPAEHRLLKTCWSCRVLSGLGLMGA
0.1	Q8WY07	sp|Q8WY07|CTR3_HUMAN Cationic amino acid transporter 3 OS=Homo sapiens OX=9606 GN=SLC7A3 PE=1 SV=1	64	PSIVICFLVAALSSVLAGLCYAEFGARVPRS
0.1	P52569	sp|P52569|CTR2_HUMAN Cationic amino acid transporter 2 OS=Homo sapiens OX=9606 GN=SLC7A2 PE=1 SV=2	12	RCLIRRKIVTLDSLEDTKLCRCLSTMDLIAL
0.1	P78310	sp|P78310|CXAR_HUMAN Coxsackievirus and adenovirus receptor OS=Homo sapiens OX=9606 GN=CXADR PE=1 SV=1	208	GTYSCTVRNRVGSDQCLLRLNVVPPSNKAGL
0.1	Q9P1W3	sp|Q9P1W3|CSC1_HUMAN Calcium permeable stress-gated cation channel 1 OS=Homo sapiens OX=9606 GN=TMEM63C PE=2 SV=1	107	CSWFFNSITMKDEDLINKCGDDARIYIVFQY
0.1	Q6ZS10	sp|Q6ZS10|CL17A_HUMAN C-type lectin domain family 17	member A OS=Homo sapiens OX=9606 GN=CLEC17A PE=1 SV=2	146
0.1	Q08722	sp|Q08722|CD47_HUMAN Leukocyte surface antigen CD47 OS=Homo sapiens OX=9606 GN=CD47 PE=1 SV=1	256	LSLCIAACIPMHGPLLISGLSILALAQLLGL
0.1	O94823	sp|O94823|AT10B_HUMAN Probable phospholipid-transporting ATPase VB OS=Homo sapiens OX=9606 GN=ATP10B PE=2 SV=2	1115	YYLYKNVCYVNLLFWYQFFCGFSSSTMIDYW
0.1	Q9BRI3	sp|Q9BRI3|ZNT2_HUMAN Zinc transporter 2 OS=Homo sapiens OX=9606 GN=SLC30A2 PE=1 SV=1	62	HCDPKKGKAQRQLYVASAICLLFMIGEVVEI
0.1	Q6J9G0	sp|Q6J9G0|STYK1_HUMAN Tyrosine-protein kinase STYK1 OS=Homo sapiens OX=9606 GN=STYK1 PE=1 SV=4	1	MGMTRMLLECSLSDKLCVIQEKQYEVIIVPT
0.1	Q99726	sp|Q99726|ZNT3_HUMAN Zinc transporter 3 OS=Homo sapiens OX=9606 GN=SLC30A3 PE=1 SV=2	76	LYAACAVCFVFMAGEVVGGYLAHSLAIMTDA
0.1	Q9BRV3	sp|Q9BRV3|SWET1_HUMAN Sugar transporter SWEET1 OS=Homo sapiens OX=9606 GN=SLC50A1 PE=1 SV=1	157	TQCLSYPLTIATLLTSASWCLYGFRLRDPYI
0.1	P06133	sp|P06133|UD2B4_HUMAN UDP-glucuronosyltransferase 2B4 OS=Homo sapiens OX=9606 GN=UGT2B4 PE=1 SV=2	509	TKCLFCVWKFVRTGKKGKRD
0.1	Q9HCF6	sp|Q9HCF6|TRPM3_HUMAN Transient receptor potential cation channel subfamily M member 3 OS=Homo sapiens OX=9606 GN=TRPM3 PE=2 SV=4	1088	PPCGQNETREDGKIIQLPPCKTGAWIVPAIM
0.1	A6NH52	sp|A6NH52|TV23A_HUMAN Golgi apparatus membrane protein TVP23 homolog A OS=Homo sapiens OX=9606 GN=TVP23A PE=1 SV=3	52	CDWFSKSFVGCFVMVLLLLSLDFWSVKNVTG
0.1	P34981	sp|P34981|TRFR_HUMAN Thyrotropin-releasing hormone receptor OS=Homo sapiens OX=9606 GN=TRHR PE=1 SV=1	83	ITDSIYGSWVYGYVGCLCITYLQYLGINASS
0.1	P37173	sp|P37173|TGFR2_HUMAN TGF-beta receptor type-2 OS=Homo sapiens OX=9606 GN=TGFBR2 PE=1 SV=2	137	SCSSDECNDNIIFSEEYNTSNPDLLLVIFQV
0.1	Q8IY95	sp|Q8IY95|TM192_HUMAN Transmembrane protein 192 OS=Homo sapiens OX=9606 GN=TMEM192 PE=1 SV=1	67	LTGVLCSYPNPNEDKCPGNYTNPLKVQTVII
0.1	Q9BSA9	sp|Q9BSA9|TM175_HUMAN Endosomal/lysosomal potassium channel TMEM175 OS=Homo sapiens OX=9606 GN=TMEM175 PE=1 SV=1	13	TPGDCPPGRRDEDAGEGIQCSQRMLSFSDAL
0.1	Q8NEW0	sp|Q8NEW0|ZNT7_HUMAN Zinc transporter 7 OS=Homo sapiens OX=9606 GN=SLC30A7 PE=2 SV=1	42	LCLNLSFAFVELLYGIWSNCLGLISDSFHMF
0.1	Q9BY10	sp|Q9BY10|TSCOT_HUMAN Thymic stromal cotransporter homolog OS=Homo sapiens OX=9606 GN=SLC46A2 PE=2 SV=1	196	KQMAGHSGQGLILTACSVSCASFALLYSLLV
0.1	Q86WB7	sp|Q86WB7|UN93A_HUMAN Protein unc-93 homolog A OS=Homo sapiens OX=9606 GN=UNC93A PE=1 SV=1	62	IERLGCKGTIILSMCGYVAFSVGNFFASWYT
0.1	P17152	sp|P17152|TMM11_HUMAN Transmembrane protein 11	mitochondrial OS=Homo sapiens OX=9606 GN=TMEM11 PE=1 SV=1	100
0.1	Q9NV12	sp|Q9NV12|TM140_HUMAN Transmembrane protein 140 OS=Homo sapiens OX=9606 GN=TMEM140 PE=1 SV=2	48	GFYNFCLWNEDTSTLQCHQFPELEALGVPRV
0.1	Q7Z410	sp|Q7Z410|TMPS9_HUMAN Transmembrane protease serine 9 OS=Homo sapiens OX=9606 GN=TMPRSS9 PE=1 SV=2	7	DVHLVPRTTKEVPALDAACCRAASIGVVATS
0.1	Q9NZ01	sp|Q9NZ01|TECR_HUMAN Very-long-chain enoyl-CoA reductase OS=Homo sapiens OX=9606 GN=TECR PE=1 SV=1	114	GHKYDFTSSRHTVVHLACICHSFHYIKRLLE
0.1	Q6ZVK1	sp|Q6ZVK1|T179A_HUMAN Transmembrane protein 179 OS=Homo sapiens OX=9606 GN=TMEM179 PE=2 SV=2	130	VGFTMWCDTITEKGTVPHSCEELQDIDLELG
0.1	Q6N022	sp|Q6N022|TEN4_HUMAN Teneurin-4 OS=Homo sapiens OX=9606 GN=TENM4 PE=1 SV=2	322	TFARPAFNLKKPSKYCNWKCAALSAIVISAT
0.1	Q3KNW5	sp|Q3KNW5|SOAT_HUMAN Solute carrier family 10 member 6 OS=Homo sapiens OX=9606 GN=SLC10A6 PE=1 SV=2	1	MRANCSSSSACPANSSEEELPVGLEVHGNLE
0.1	Q9C0K1	sp|Q9C0K1|S39A8_HUMAN Metal cation symporter ZIP8 OS=Homo sapiens OX=9606 GN=SLC39A8 PE=1 SV=1	359	GMSTRQALLFNFLSACSCYVGLAFGILVGNN
0.1	P31645	sp|P31645|SC6A4_HUMAN Sodium-dependent serotonin transporter OS=Homo sapiens OX=9606 GN=SLC6A4 PE=1 SV=1	136	ELALGQYHRNGCISIWRKICPIFKGIGYAIC
0.1	Q9H799	sp|Q9H799|CPLN1_HUMAN Ciliogenesis and planar polarity effector 1 OS=Homo sapiens OX=9606 GN=CPLANE1 PE=1 SV=4	601	CITHFFYILQFIKCPFPKLDLVLSKSSRHNA
0.1	P51798	sp|P51798|CLCN7_HUMAN H(+)/Cl(-) exchange transporter 7 OS=Homo sapiens OX=9606 GN=CLCN7 PE=1 SV=2	435	SRDCQPLQGGSMSYPLQLFCADGEYNSMAAA
0.1	O95471	sp|O95471|CLD7_HUMAN Claudin-7 OS=Homo sapiens OX=9606 GN=CLDN7 PE=1 SV=4	52	MDCVTQSTGMMSCKMYDSVLALSAALQATRA
0.1	O14735	sp|O14735|CDIPT_HUMAN CDP-diacylglycerol--inositol 3-phosphatidyltransferase OS=Homo sapiens OX=9606 GN=CDIPT PE=1 SV=1	26	FYFMPCCPLTASSFYLLSGLLDAFDGHAARA
0.1	Q13936	sp|Q13936|CAC1C_HUMAN Voltage-dependent L-type calcium channel subunit alpha-1C OS=Homo sapiens OX=9606 GN=CACNA1C PE=1 SV=4	98	TRPPRALLCLTLKNPIRRACISIVEWKPFEI
0.1	Q16602	sp|Q16602|CALRL_HUMAN Calcitonin gene-related peptide type 1 receptor OS=Homo sapiens OX=9606 GN=CALCRL PE=1 SV=2	167	KSLSCQRITLHKNLFFSFVCNSVVTIIHLTA
0.1	Q01814	sp|Q01814|AT2B2_HUMAN Plasma membrane calcium-transporting ATPase 2 OS=Homo sapiens OX=9606 GN=ATP2B2 PE=1 SV=2	1050	GGKPFSCSPLQLDQWMWCIFIGLGELVWGQV
0.1	Q99788	sp|Q99788|CML1_HUMAN Chemokine-like receptor 1 OS=Homo sapiens OX=9606 GN=CMKLR1 PE=1 SV=2	255	TKKPFKIIVTIIITFFLCWCPYHTLNLLELH
0.1	Q99467	sp|Q99467|CD180_HUMAN CD180 antigen OS=Homo sapiens OX=9606 GN=CD180 PE=1 SV=2	606	TCANPPSLRGVKLSDVKLSCGITAIGIFFLI
0.1	O14569	sp|O14569|C56D2_HUMAN Cytochrome b561 domain-containing protein 2 OS=Homo sapiens OX=9606 GN=CYB561D2 PE=1 SV=1	77	LSRKGRARCHWVLQLLALLCALLGLGLVILH
0.1	Q9NR16	sp|Q9NR16|C163B_HUMAN Scavenger receptor cysteine-rich type 1 protein M160 OS=Homo sapiens OX=9606 GN=CD163L1 PE=1 SV=2	1330	WGQSDCGHKEDAGVRCSGQSLKSLNASSGHL
0.1	P07307	sp|P07307|ASGR2_HUMAN Asialoglycoprotein receptor 2 OS=Homo sapiens OX=9606 GN=ASGR2 PE=1 SV=2	39	FLKGPPPAQPLAQRLCSMVCFSLLALSFNIL
0.1	Q0P6D2	sp|Q0P6D2|DIK1C_HUMAN Divergent protein kinase domain 1C OS=Homo sapiens OX=9606 GN=DIPK1C PE=2 SV=3	1	MARAAGARGPAGWCRRRGRCGRGTLLAFAAW
0.1	Q7KZN9	sp|Q7KZN9|COX15_HUMAN Cytochrome c oxidase assembly protein COX15 homolog OS=Homo sapiens OX=9606 GN=COX15 PE=1 SV=1	173	KGWLSRGMKGRVLALCGLVCFQGLLGWYMVK
0.1	Q92478	sp|Q92478|CLC2B_HUMAN C-type lectin domain family 2 member B OS=Homo sapiens OX=9606 GN=CLEC2B PE=1 SV=2	27	LTRDSQSLCPYDWIGFQNKCYYFSKEEGDWN
0.1	Q5VV42	sp|Q5VV42|CDKAL_HUMAN Threonylcarbamoyladenosine tRNA methylthiotransferase OS=Homo sapiens OX=9606 GN=CDKAL1 PE=1 SV=1	537	QCDSASSRMVLPMPRLHQDCALRMSVGLALL
0.1	P27701	sp|P27701|CD82_HUMAN CD82 antigen OS=Homo sapiens OX=9606 GN=CD82 PE=1 SV=1	72	LGCIGAVNEVRCLLGLYFAFLLLILIAQVTA
0.1	Q4VNC0	sp|Q4VNC0|AT135_HUMAN Probable cation-transporting ATPase 13A5 OS=Homo sapiens OX=9606 GN=ATP13A5 PE=2 SV=1	53	WRPQWRVWANCIPCPLQEADTVLLRTTDEFQ
0.1	Q8IXF9	sp|Q8IXF9|AQ12A_HUMAN Aquaporin-12A OS=Homo sapiens OX=9606 GN=AQP12A PE=2 SV=1	120	CWAWELSDLHLLQSLMAQSCSSALRTSVPHG
0.1	P01133	sp|P01133|EGF_HUMAN Pro-epidermal growth factor OS=Homo sapiens OX=9606 GN=EGF PE=1 SV=2	1003	CVVGYIGERCQYRDLKWWELRHAGHGQQQKV
0.1	P29322	sp|P29322|EPHA8_HUMAN Ephrin type-A receptor 8 OS=Homo sapiens OX=9606 GN=EPHA8 PE=1 SV=2	563	CKKRHCGYSKAFQDSDEEKMHYQNGQAPPPV
0.1	Q5T1A1	sp|Q5T1A1|DCST2_HUMAN DC-STAMP domain-containing protein 2 OS=Homo sapiens OX=9606 GN=DCST2 PE=2 SV=2	204	NPYLKCARVFDDAKDSCMMVIPQAYHLCYVL
0.1	Q13733	sp|Q13733|AT1A4_HUMAN Sodium/potassium-transporting ATPase subunit alpha-4 OS=Homo sapiens OX=9606 GN=ATP1A4 PE=1 SV=3	346	ATVTVCLTLTAKRMARKNCLVKNLEAVETLG
0.1	O94911	sp|O94911|ABCA8_HUMAN ATP-binding cassette sub-family A member 8 OS=Homo sapiens OX=9606 GN=ABCA8 PE=1 SV=3	1	MRKRKISVCQQTWALLCKNFLKKWRMKRESL
0.1	O60931	sp|O60931|CTNS_HUMAN Cystinosin OS=Homo sapiens OX=9606 GN=CTNS PE=1 SV=2	208	FSLHAVVLTLIIIVQCCLYERGGQRVSWPAI
0.1	P25024	sp|P25024|CXCR1_HUMAN C-X-C chemokine receptor type 1 OS=Homo sapiens OX=9606 GN=CXCR1 PE=1 SV=2	141	HATRTLTQKRHLVKFVCLGCWGLSMNLSLPF
0.1	P56748	sp|P56748|CLD8_HUMAN Claudin-8 OS=Homo sapiens OX=9606 GN=CLDN8 PE=1 SV=1	52	MNCVRQANIRMQCKIYDSLLALSPDLQAARG
0.1	P51801	sp|P51801|CLCKB_HUMAN Chloride channel protein ClC-Kb OS=Homo sapiens OX=9606 GN=CLCNKB PE=1 SV=3	138	YLDIKNFGAKVVGLSCTLACGSTLFLGKVGP
0.1	Q96S66	sp|Q96S66|CLCC1_HUMAN Chloride channel CLIC-like protein 1 OS=Homo sapiens OX=9606 GN=CLCC1 PE=1 SV=1	187	MVLLCLLCIVVLVATELWTYVRWYTQLRRVL
0.1	P46092	sp|P46092|CCR10_HUMAN C-C chemokine receptor type 10 OS=Homo sapiens OX=9606 GN=CCR10 PE=1 SV=3	321	LRRLLRGGSCPSGPQPRRGCPRRPRLSSCSA
0.1	Q8IZF7	sp|Q8IZF7|AGRF2_HUMAN Adhesion G-protein coupled receptor F2 OS=Homo sapiens OX=9606 GN=ADGRF2 PE=2 SV=1	458	ICSLILCLSIEVLVWSQVTKTEITYLRHVCI
0.1	B1AL88	sp|B1AL88|F155A_HUMAN Transmembrane protein FAM155A OS=Homo sapiens OX=9606 GN=FAM155A PE=2 SV=1	394	EKSGSCHRTSLTVSSATRLCNSRLKLCVLVL
0.1	Q8IZU8	sp|Q8IZU8|DSEL_HUMAN Dermatan-sulfate epimerase-like protein OS=Homo sapiens OX=9606 GN=DSEL PE=2 SV=2	823	CSQPICAKWTRTEAEGSKKSLSSEGHHMDLP
0.1	P61803	sp|P61803|DAD1_HUMAN Dolichyl-diphosphooligosaccharide--protein glycosyltransferase subunit DAD1 OS=Homo sapiens OX=9606 GN=DAD1 PE=1 SV=3	53	FNSFLSGFISCVGSFILAVCLRIQINPQNKA
0.1	P32302	sp|P32302|CXCR5_HUMAN C-X-C chemokine receptor type 5 OS=Homo sapiens OX=9606 GN=CXCR5 PE=1 SV=1	116	VLGTFLCKTVIALHKVNFYCSSLLLACIAVD
0.1	P51684	sp|P51684|CCR6_HUMAN C-C chemokine receptor type 6 OS=Homo sapiens OX=9606 GN=CCR6 PE=1 SV=2	112	VFSNATCKLLKGIYAINFNCGMLLLTCISMD
0.1	P27544	sp|P27544|CERS1_HUMAN Ceramide synthase 1 OS=Homo sapiens OX=9606 GN=CERS1 PE=1 SV=1	23	VQRGWGSALAAARGCTDCGWGLARRGLAEHA
0.1	A0A0K2S4Q6	sp|A0A0K2S4Q6|CD3CH_HUMAN Protein CD300H OS=Homo sapiens OX=9606 GN=CD300H PE=1 SV=1	149	TPASPTRPSQCQGSLPSSTCFLLLPLLKVPL
0.1	Q9BXU9	sp|Q9BXU9|CABP8_HUMAN Calcium-binding protein 8 OS=Homo sapiens OX=9606 GN=CALN1 PE=1 SV=1	169	GNCQTEFEGVHSQKQNRQTCVRKSLICAFAM
0.1	P30411	sp|P30411|BKRB2_HUMAN B2 bradykinin receptor OS=Homo sapiens OX=9606 GN=BDKRB2 PE=1 SV=2	89	CTVAEIYLGNLAAADLILACGLPFWAITISN
0.1	Q96RQ1	sp|Q96RQ1|ERGI2_HUMAN Endoplasmic reticulum-Golgi intermediate compartment protein 2 OS=Homo sapiens OX=9606 GN=ERGIC2 PE=1 SV=2	340	VEIICCRFRLGSYKPVNSVPFEDGHTDNHLP
0.1	P29973	sp|P29973|CNGA1_HUMAN cGMP-gated cation channel alpha-1 OS=Homo sapiens OX=9606 GN=CNGA1 PE=1 SV=3	169	LFCITLPVMYNWTMVIARACFDELQSDYLEY
0.1	A0ZSE6	sp|A0ZSE6|CC50C_HUMAN Cell cycle control protein 50C OS=Homo sapiens OX=9606 GN=TMEM30CP PE=2 SV=2	55	LSARSTQEIEINYTRICANCAKLRENASNFD
0.1	Q9NV96	sp|Q9NV96|CC50A_HUMAN Cell cycle control protein 50A OS=Homo sapiens OX=9606 GN=TMEM30A PE=1 SV=1	75	IREIEIDYTGTEPSSPCNKCLSPDVTPCFCT
0.1	O60320	sp|O60320|F1891_HUMAN Protein FAM189A1 OS=Homo sapiens OX=9606 GN=FAM189A1 PE=2 SV=4	96	FMLLSAVCVMLNLAGSILSCQNAQLVNSLEG
0.1	Q9Y4D2	sp|Q9Y4D2|DGLA_HUMAN Diacylglycerol lipase-alpha OS=Homo sapiens OX=9606 GN=DAGLA PE=1 SV=3	50	ACSLNLVDHGRGYLGILLSCMIAEMAIIWLS
0.1	Q7Z449	sp|Q7Z449|CP2U1_HUMAN Cytochrome P450 2U1 OS=Homo sapiens OX=9606 GN=CYP2U1 PE=1 SV=1	231	IICSLCFGQRFDYTNSEFKKMLGFMSRGLEI
0.1	A0A1B0GUU1	sp|A0A1B0GUU1|CQ113_HUMAN Transmembrane protein C17orf113 OS=Homo sapiens OX=9606 GN=C17orf113 PE=3 SV=1	566	RVVFGLGRLGPRALCTQLACAHSELHELFPD
0.1	Q9Y271	sp|Q9Y271|CLTR1_HUMAN Cysteinyl leukotriene receptor 1 OS=Homo sapiens OX=9606 GN=CYSLTR1 PE=1 SV=1	55	KSAFQVYMINLAVADLLCVCTLPLRVVYYVH
0.1	Q86XJ0	sp|Q86XJ0|CAHM3_HUMAN Calcium homeostasis modulator protein 3 OS=Homo sapiens OX=9606 GN=CALHM3 PE=1 SV=2	37	FDFNCPCLVHYNALYGLGLLLTPPLALFLCG
0.1	Q9NYX4	sp|Q9NYX4|CALY_HUMAN Neuron-specific vesicular protein calcyon OS=Homo sapiens OX=9606 GN=CALY PE=1 SV=1	108	YDQFTCPDGFLLRHKICTPLTLEMYYTEMDP
0.1	P55899	sp|P55899|FCGRN_HUMAN IgG receptor FcRn large subunit p51 OS=Homo sapiens OX=9606 GN=FCGRT PE=1 SV=1	268	GDEHHYCCIVQHAGLAQPLRVELESPAKSSV
0.1	Q9H8M9	sp|Q9H8M9|EVA1A_HUMAN Protein eva-1 homolog A OS=Homo sapiens OX=9606 GN=EVA1A PE=1 SV=1	55	IRISCHTDCRRRPGKKFLQDRESSSDSSDSE
0.1	Q6PI25	sp|Q6PI25|CNIH2_HUMAN Protein cornichon homolog 2 OS=Homo sapiens OX=9606 GN=CNIH2 PE=1 SV=1	43	DQGNPARARERLKNIERICCLLRKLVVPEYS
0.1	Q5ZPR3	sp|Q5ZPR3|CD276_HUMAN CD276 antigen OS=Homo sapiens OX=9606 GN=CD276 PE=1 SV=1	487	VCWRKIKQSCEEENAGAEDQDGEGEGSKTAL
0.1	Q8WUD6	sp|Q8WUD6|CHPT1_HUMAN Cholinephosphotransferase 1 OS=Homo sapiens OX=9606 GN=CHPT1 PE=1 SV=1	116	KQARRTNSCSPLGELFDHGCDSLSTVFMAVG
0.1	Q6V0I7	sp|Q6V0I7|FAT4_HUMAN Protocadherin Fat 4 OS=Homo sapiens OX=9606 GN=FAT4 PE=1 SV=2	4475	QGKVCKAGSPAGHVCVLSQGPEEISLPLWAV
0.1	O43731	sp|O43731|ERD23_HUMAN ER lumen protein-retaining receptor 3 OS=Homo sapiens OX=9606 GN=KDELR3 PE=1 SV=1	24	WRSKCCKGISGKSQILFALVFTTRYLDLFTN
0.1	P42892	sp|P42892|ECE1_HUMAN Endothelin-converting enzyme 1 OS=Homo sapiens OX=9606 GN=ECE1 PE=1 SV=2	89	IQYQTRSPSVCLSEACVSVTSSILSSMDPTV
0.1	P01730	sp|P01730|CD4_HUMAN T-cell surface glycoprotein CD4 OS=Homo sapiens OX=9606 GN=CD4 PE=1 SV=1	418	FCVRCRHRRRQAERMSQIKRLLSEKKTCQCP
0.1	Q01668	sp|Q01668|CAC1D_HUMAN Voltage-dependent L-type calcium channel subunit alpha-1D OS=Homo sapiens OX=9606 GN=CACNA1D PE=1 SV=2	100	SRPARALFCLSLNNPIRRACISIVEWKPFDI
0.1	P46094	sp|P46094|XCR1_HUMAN Chemokine XC receptor 1 OS=Homo sapiens OX=9606 GN=XCR1 PE=1 SV=1	63	ESLTNIFILNLCLSDLVFACLLPVWISPYHW
0.1	P32241	sp|P32241|VIPR1_HUMAN Vasoactive intestinal polypeptide receptor 1 OS=Homo sapiens OX=9606 GN=VIPR1 PE=1 SV=1	196	DLALFDSGESDQCSEGSVGCKAAMVFFQYCV
0.1	Q5TGU0	sp|Q5TGU0|TSPO2_HUMAN Translocator protein 2 OS=Homo sapiens OX=9606 GN=TSPO2 PE=1 SV=1	23	TRDHMSGWCEGPRMLSWCPFYKVLLLVQTAI
0.1	Q9NYW6	sp|Q9NYW6|TA2R3_HUMAN Taste receptor type 2 member 3 OS=Homo sapiens OX=9606 GN=TAS2R3 PE=2 SV=3	99	LATCLGVLYCLKIASFSHPTFLWLKWRVSRV
0.1	P0DSN6	sp|P0DSN6|T2R33_HUMAN Putative taste receptor type 2 member 33 OS=Homo sapiens OX=9606 GN=TAS2R33 PE=5 SV=1	200	CSLCKHLKKMQLHSKGSQDPSTKVHIKALQT
0.1	B2RXF0	sp|B2RXF0|T229A_HUMAN Transmembrane protein 229A OS=Homo sapiens OX=9606 GN=TMEM229A PE=2 SV=2	330	TCGACSWDYSHYPLNFMGLITLMYLPGWIFL
0.1	P30874	sp|P30874|SSR2_HUMAN Somatostatin receptor type 2 OS=Homo sapiens OX=9606 GN=SSTR2 PE=1 SV=1	49	IYFVVCIIGLCGNTLVIYVILRYAKMKTITN
0.1	Q8NHU3	sp|Q8NHU3|SMS2_HUMAN Phosphatidylcholine:ceramide cholinephosphotransferase 2 OS=Homo sapiens OX=9606 GN=SGMS2 PE=1 SV=1	152	KSIVGRRFCFIIGTLYLYRCITMYVTTLPVP
0.1	Q9Y289	sp|Q9Y289|SC5A6_HUMAN Sodium-dependent multivitamin transporter OS=Homo sapiens OX=9606 GN=SLC5A6 PE=2 SV=2	88	VPSEIYRFGTQYWFLGCCYFLGLLIPAHIFI
0.1	Q8NET8	sp|Q8NET8|TRPV3_HUMAN Transient receptor potential cation channel subfamily V member 3 OS=Homo sapiens OX=9606 GN=TRPV3 PE=1 SV=2	610	EKCPKDNKDCSSYGSFSDAVLELFKLTIGLG
0.1	O43657	sp|O43657|TSN6_HUMAN Tetraspanin-6 OS=Homo sapiens OX=9606 GN=TSPAN6 PE=1 SV=1	64	LIATGTVIILLGTFGCFATCRASAWMLKLYA
0.1	Q9UM00	sp|Q9UM00|TMCO1_HUMAN Calcium load-activated calcium channel OS=Homo sapiens OX=9606 GN=TMCO1 PE=1 SV=2	31	TFPGCRALSPWRVRVQRRRCEMSTMFADTLL
0.1	Q6UX40	sp|Q6UX40|TM107_HUMAN Transmembrane protein 107 OS=Homo sapiens OX=9606 GN=TMEM107 PE=1 SV=1	103	ERWECTTYWYIFVFCSALPAVTEMALFVTVF
0.1	Q9BY07	sp|Q9BY07|S4A5_HUMAN Electrogenic sodium bicarbonate cotransporter 4 OS=Homo sapiens OX=9606 GN=SLC4A5 PE=2 SV=2	718	SLLSKKECLSYGGRLLGNSCKFIPDLALMSF
0.1	Q5TZJ5	sp|Q5TZJ5|S31A1_HUMAN Spermatogenesis-associated protein 31A1 OS=Homo sapiens OX=9606 GN=SPATA31A1 PE=3 SV=1	45	YLSYFRCDDPPSPSPGKRKCPVGRRRRPRGR
0.1	O14609	sp|O14609|XKRY_HUMAN Testis-specific XK-related protein	Y-linked OS=Homo sapiens OX=9606 GN=XKRY PE=2 SV=1	15
0.1	Q5GH73	sp|Q5GH73|XKR6_HUMAN XK-related protein 6 OS=Homo sapiens OX=9606 GN=XKR6 PE=2 SV=1	392	VHWCAMAFWIIHGGTDFCMSKWEEILFNMVV
0.1	Q8TAA9	sp|Q8TAA9|VANG1_HUMAN Vang-like protein 1 OS=Homo sapiens OX=9606 GN=VANGL1 PE=1 SV=1	138	WRDELEPCGTICEGLFISMAFKLLILLIGTW
0.1	P59536	sp|P59536|T2R41_HUMAN Taste receptor type 2 member 41 OS=Homo sapiens OX=9606 GN=TAS2R41 PE=1 SV=2	100	CSWLSVLFCVKIANITHSTFLWLKWRFPGWV
0.1	P59544	sp|P59544|T2R50_HUMAN Taste receptor type 2 member 50 OS=Homo sapiens OX=9606 GN=TAS2R50 PE=2 SV=2	200	CSLCKHLKKMQLHGEGSQDLSTKVHIKALQT
0.1	Q3YBM2	sp|Q3YBM2|T176B_HUMAN Transmembrane protein 176B OS=Homo sapiens OX=9606 GN=TMEM176B PE=1 SV=2	65	LALGVTQILLGVVSCVLGVCLSLGPWTVLSA
0.1	Q96HP8	sp|Q96HP8|T176A_HUMAN Transmembrane protein 176A OS=Homo sapiens OX=9606 GN=TMEM176A PE=1 SV=1	25	QESALAKLLLTCCSALRPRATQARGSSRLLV
0.1	Q9P273	sp|Q9P273|TEN3_HUMAN Teneurin-3 OS=Homo sapiens OX=9606 GN=TENM3 PE=1 SV=3	290	TLSRSAFKFKKSSKYCSWKCTALCAVGVSVL
0.1	Q8WVE7	sp|Q8WVE7|T170A_HUMAN Transmembrane protein 170A OS=Homo sapiens OX=9606 GN=TMEM170A PE=1 SV=1	22	LKVVPRVGNGTLCPNSTSLCSFPEMWYGVFL
0.1	Q9NX95	sp|Q9NX95|SYBU_HUMAN Syntabulin OS=Homo sapiens OX=9606 GN=SYBU PE=1 SV=2	628	TQRGGTDPVYNIGALLRGCCVVALHSLRRTA
0.1	Q4U2R8	sp|Q4U2R8|S22A6_HUMAN Solute carrier family 22 member 6 OS=Homo sapiens OX=9606 GN=SLC22A6 PE=1 SV=1	187	IYCAFRLLSGMALAGISLNCMTLNVEWMPIH
0.1	Q9UHI7	sp|Q9UHI7|S23A1_HUMAN Solute carrier family 23 member 1 OS=Homo sapiens OX=9606 GN=SLC23A1 PE=1 SV=3	52	YLTCFSGTIAVPFLLAEALCVGHDQHMVSQL
0.1	P51168	sp|P51168|SCNNB_HUMAN Amiloride-sensitive sodium channel subunit beta OS=Homo sapiens OX=9606 GN=SCNN1B PE=1 SV=2	24	ELLVWYCDNTNTHGPKRIICEGPKKKAMWFL
0.1	Q9BQB6	sp|Q9BQB6|VKOR1_HUMAN Vitamin K epoxide reductase complex subunit 1 OS=Homo sapiens OX=9606 GN=VKORC1 PE=1 SV=1	32	ARARDRDYRALCDVGTAISCSRVFSSRWGRG
0.1	Q5BVD1	sp|Q5BVD1|TTMP_HUMAN TPA-induced transmembrane protein OS=Homo sapiens OX=9606 GN=TTMP PE=1 SV=2	45	AEANKESPWSSCNKNVVGRCKLWMIITSIFL
0.1	Q9HAV5	sp|Q9HAV5|TNR27_HUMAN Tumor necrosis factor receptor superfamily member 27 OS=Homo sapiens OX=9606 GN=EDA2R PE=1 SV=2	159	FLYCKQFFNRHCQRGGLLQFEADKTAKEESL
0.1	A6NGC4	sp|A6NGC4|TLCD2_HUMAN TLC domain-containing protein 2 OS=Homo sapiens OX=9606 GN=TLCD2 PE=3 SV=3	99	NQTLGKTWDLLCHHLVVVSCLSTAVLSGHYV
0.1	A6NEH6	sp|A6NEH6|TM247_HUMAN Transmembrane protein 247 OS=Homo sapiens OX=9606 GN=TMEM247 PE=4 SV=2	193	MVFFLFAKHYLFCIAAILLCLIKTFWS
0.1	Q9HC07	sp|Q9HC07|TM165_HUMAN Transmembrane protein 165 OS=Homo sapiens OX=9606 GN=TMEM165 PE=1 SV=1	270	AVGGTVGHCLCTGLAVIGGRMIAQKISVRTV
0.1	Q9BVK8	sp|Q9BVK8|TM147_HUMAN Transmembrane protein 147 OS=Homo sapiens OX=9606 GN=TMEM147 PE=1 SV=1	21	YKCSGLSEYNAFWKCVQAGVTYLFVQLCKML
0.1	Q8NBL3	sp|Q8NBL3|T178A_HUMAN Transmembrane protein 178A OS=Homo sapiens OX=9606 GN=TMEM178A PE=2 SV=1	207	QHVAGLLFLMTGIFCTISLCTYAASISYDLN
0.1	Q8NBD8	sp|Q8NBD8|T229B_HUMAN Transmembrane protein 229B OS=Homo sapiens OX=9606 GN=TMEM229B PE=1 SV=1	61	ERMYLRLRGRCPLLLRCLIYTLWTYLWEFTT
0.1	Q8IWX5	sp|Q8IWX5|SGPP2_HUMAN Sphingosine-1-phosphate phosphatase 2 OS=Homo sapiens OX=9606 GN=SGPP2 PE=1 SV=1	239	IDCLDSASPLFPVCVIVVPFFLCYNYPVSDY
0.1	Q96QK8	sp|Q96QK8|SIM14_HUMAN Small integral membrane protein 14 OS=Homo sapiens OX=9606 GN=SMIM14 PE=1 SV=1	20	RRLINLLRQSQSYCTDTECLQELPGPSGDNG
0.1	Q9BSK2	sp|Q9BSK2|S2533_HUMAN Solute carrier family 25 member 33 OS=Homo sapiens OX=9606 GN=SLC25A33 PE=1 SV=1	19	GCGGTVGAIFTCPLEVIKTRLQSSRLALRTV
0.1	Q8TBE7	sp|Q8TBE7|S35G2_HUMAN Solute carrier family 35 member G2 OS=Homo sapiens OX=9606 GN=SLC35G2 PE=1 SV=3	162	SGYRLRLFFYGVCNVISITCAYTSFSIVPPS
0.1	Q8TB61	sp|Q8TB61|S35B2_HUMAN Adenosine 3'-phospho 5'-phosphosulfate transporter 1 OS=Homo sapiens OX=9606 GN=SLC35B2 PE=1 SV=1	61	RRKNYLETGRGLCFPLVKACVFGNEPKASDE
0.1	Q9NP94	sp|Q9NP94|S39A2_HUMAN Zinc transporter ZIP2 OS=Homo sapiens OX=9606 GN=SLC39A2 PE=1 SV=2	17	ALTLGCGLTPICFKWFQIDAARGHHRLVLRL
0.1	Q92736	sp|Q92736|RYR2_HUMAN Ryanodine receptor 2 OS=Homo sapiens OX=9606 GN=RYR2 PE=1 SV=3	4793	YNKSEDGDTPDMKCDDMLTCYMFHMYVGVRA
0.1	P38435	sp|P38435|VKGC_HUMAN Vitamin K-dependent gamma-carboxylase OS=Homo sapiens OX=9606 GN=GGCX PE=1 SV=2	134	CYRISCVLFLLPYWYVFLLDKTSWNNHSYLY
0.1	Q8IZJ1	sp|Q8IZJ1|UNC5B_HUMAN Netrin receptor UNC5B OS=Homo sapiens OX=9606 GN=UNC5B PE=1 SV=2	348	CTDGLCMQNKKTLSDPNSHLLEASGDAALYA
0.1	B0FP48	sp|B0FP48|UPK3L_HUMAN Uroplakin-3b-like protein 1 OS=Homo sapiens OX=9606 GN=UPK3BL1 PE=2 SV=1	225	IYTCFNSCRSTSLSGPEEAGSVRRYTTHLAF
0.1	Q9BZW4	sp|Q9BZW4|TM6S2_HUMAN Transmembrane 6 superfamily member 2 OS=Homo sapiens OX=9606 GN=TM6SF2 PE=1 SV=3	113	CYWDGTVHYLLYLAMAGAICRRKRYRNFGLY
0.1	Q96IK0	sp|Q96IK0|TM101_HUMAN Transmembrane protein 101 OS=Homo sapiens OX=9606 GN=TMEM101 PE=1 SV=1	22	LLTRCPFWGCFSQLMLYAERAEARRKPDIPV
0.1	Q9H3S3	sp|Q9H3S3|TMPS5_HUMAN Transmembrane protease serine 5 OS=Homo sapiens OX=9606 GN=TMPRSS5 PE=1 SV=2	30	GDQQHPISQAVCWRSMRRGCAVLGALGLLAG
0.1	Q9UIK5	sp|Q9UIK5|TEFF2_HUMAN Tomoregulin-2 OS=Homo sapiens OX=9606 GN=TMEFF2 PE=1 SV=1	291	CDAGYTGQHCEKKDYSVLYVVPGPVRFQYVL
0.1	A8MXK1	sp|A8MXK1|VSTM5_HUMAN V-set and transmembrane domain-containing protein 5 OS=Homo sapiens OX=9606 GN=VSTM5 PE=3 SV=1	168	WVCNKCAYKFQRKRRHKLKESTTEEIELEDV
0.1	Q9BU79	sp|Q9BU79|TM243_HUMAN Transmembrane protein 243 OS=Homo sapiens OX=9606 GN=TMEM243 PE=1 SV=1	57	PKPLNIFFAVCISLSSITACILIYWYRQGDL
0.1	Q9NR97	sp|Q9NR97|TLR8_HUMAN Toll-like receptor 8 OS=Homo sapiens OX=9606 GN=TLR8 PE=1 SV=1	803	CASPGDQRGKSIVSLELTTCVSDVTAVILFF
0.1	Q8IUX1	sp|Q8IUX1|T126B_HUMAN Complex I assembly factor TMEM126B	mitochondrial OS=Homo sapiens OX=9606 GN=TMEM126B PE=1 SV=2	132
0.1	Q8IW70	sp|Q8IW70|T151B_HUMAN Transmembrane protein 151B OS=Homo sapiens OX=9606 GN=TMEM151B PE=2 SV=2	46	QRPIQPSFTKSLCRESHWKCLLLSLLMYGCL
0.1	Q13183	sp|Q13183|S13A2_HUMAN Solute carrier family 13 member 2 OS=Homo sapiens OX=9606 GN=SLC13A2 PE=1 SV=1	33	SKEAYCAYAIILMALFWCTEALPLAVTALFP
0.1	Q13336	sp|Q13336|UT1_HUMAN Urea transporter 1 OS=Homo sapiens OX=9606 GN=SLC14A1 PE=1 SV=2	138	DKGDYFWWLLLPVCAMSMTCPIFSSALNSML
0.1	Q96K49	sp|Q96K49|TM87B_HUMAN Transmembrane protein 87B OS=Homo sapiens OX=9606 GN=TMEM87B PE=1 SV=1	221	MVMCIVYILYGILWLTWSACYWKDILRIQFW
0.1	Q8IYR6	sp|Q8IYR6|TEFF1_HUMAN Tomoregulin-1 OS=Homo sapiens OX=9606 GN=TMEFF1 PE=1 SV=1	301	CESGYTGQHCEKTDFSILYVVPSRQKLTHVL
0.1	Q6ZMZ3	sp|Q6ZMZ3|SYNE3_HUMAN Nesprin-3 OS=Homo sapiens OX=9606 GN=SYNE3 PE=1 SV=2	906	GFQKTRRWRGLGSLFRRACCVALPLQLLLLL
0.1	A8MWL6	sp|A8MWL6|SNG2L_HUMAN Putative synaptogyrin-2 like protein OS=Homo sapiens OX=9606 PE=5 SV=1	49	SNTHKSKQMYCVFNHNEDACRYGSAIGVLAF
0.1	Q9H2E6	sp|Q9H2E6|SEM6A_HUMAN Semaphorin-6A OS=Homo sapiens OX=9606 GN=SEMA6A PE=1 SV=2	670	VYCVCDHRRKDVAVVQRKEKELTHSRRGSMS
0.1	Q99442	sp|Q99442|SEC62_HUMAN Translocation protein SEC62 OS=Homo sapiens OX=9606 GN=SEC62 PE=1 SV=1	227	LSVGAGCFVASILLLAVARCILFLIIWLITG
0.1	Q5VU36	sp|Q5VU36|S31A5_HUMAN Spermatogenesis-associated protein 31A5 OS=Homo sapiens OX=9606 GN=SPATA31A5 PE=3 SV=1	45	YLSYFRCDDPPSPSPGKRKCPVGRRRRPRGR
0.1	Q96RN1	sp|Q96RN1|S26A8_HUMAN Testis anion transporter 1 OS=Homo sapiens OX=9606 GN=SLC26A8 PE=1 SV=1	66	WHRFLRCVLTIFPFLEWMCMYRLKDWLLGDL
0.1	Q9BS91	sp|Q9BS91|S35A5_HUMAN Probable UDP-sugar transporter protein SLC35A5 OS=Homo sapiens OX=9606 GN=SLC35A5 PE=1 SV=2	64	VFCVLVSFCVIKKDHQSRNLKYASWKEFSDF
0.1	Q9Y267	sp|Q9Y267|S22AE_HUMAN Solute carrier family 22 member 14 OS=Homo sapiens OX=9606 GN=SLC22A14 PE=1 SV=4	359	PRKKVTRASVLDFCKNRQLCKVTLVMSCVWF
0.1	Q8N695	sp|Q8N695|SC5A8_HUMAN Sodium-coupled monocarboxylate transporter 1 OS=Homo sapiens OX=9606 GN=SLC5A8 PE=1 SV=2	111	GITSTYEYLELRFNKCVRLCGTVLFIVQTIL
0.1	Q86XK7	sp|Q86XK7|VSIG1_HUMAN V-set and immunoglobulin domain-containing protein 1 OS=Homo sapiens OX=9606 GN=VSIG1 PE=1 SV=1	203	NFEQGYYQCTAINRLGNSSCEIDLTSSHPEV
0.1	P02786	sp|P02786|TFR1_HUMAN Transferrin receptor protein 1 OS=Homo sapiens OX=9606 GN=TFRC PE=1 SV=2	48	ADNNTKANVTKPKRCSGSICYGTIAVIVFFL
0.1	Q9NYW7	sp|Q9NYW7|TA2R1_HUMAN Taste receptor type 2 member 1 OS=Homo sapiens OX=9606 GN=TAS2R1 PE=1 SV=1	76	IMCSANCAILLFINELELWLATWLGVFYCAK
0.1	Q96BZ9	sp|Q96BZ9|TBC20_HUMAN TBC1 domain family member 20 OS=Homo sapiens OX=9606 GN=TBC1D20 PE=1 SV=1	258	VLYREQEVLDCDCDMASVHHLLSQIPQDLPY
0.1	P30872	sp|P30872|SSR1_HUMAN Somatostatin receptor type 1 OS=Homo sapiens OX=9606 GN=SSTR1 PE=1 SV=1	65	YSVVCLVGLCGNSMVIYVILRYAKMKTATNI
0.1	O15126	sp|O15126|SCAM1_HUMAN Secretory carrier-associated membrane protein 1 OS=Homo sapiens OX=9606 GN=SCAMP1 PE=1 SV=2	182	VDFGLSILWFLLFTPCSFVCWYRPLYGAFRS
0.1	Q08AI6	sp|Q08AI6|S38AB_HUMAN Putative sodium-coupled neutral amino acid transporter 11 OS=Homo sapiens OX=9606 GN=SLC38A11 PE=1 SV=1	228	GDLFENYCRNDDLVTFGRFCYGVTVILTYPM
0.1	Q9NVC3	sp|Q9NVC3|S38A7_HUMAN Putative sodium-coupled neutral amino acid transporter 7 OS=Homo sapiens OX=9606 GN=SLC38A7 PE=1 SV=1	104	AYCSQASNERTYQEVVWAVCGKLTGVLCEVA
0.1	Q9Y2P4	sp|Q9Y2P4|S27A6_HUMAN Long-chain fatty acid transport protein 6 OS=Homo sapiens OX=9606 GN=SLC27A6 PE=1 SV=1	139	IRSNSLLNCIRACGPRALVVGADLLGTVEEI
0.1	Q3KQZ1	sp|Q3KQZ1|S2535_HUMAN Solute carrier family 25 member 35 OS=Homo sapiens OX=9606 GN=SLC25A35 PE=1 SV=1	8	LAACGACVFTNPLEVVKTRMQLQGELQAPGT
0.1	Q9UMX9	sp|Q9UMX9|S45A2_HUMAN Membrane-associated transporter protein OS=Homo sapiens OX=9606 GN=SLC45A2 PE=1 SV=2	216	QVMFFFSALVLTLCFTVHLCSISEAPLTEVA
0.1	Q8NBI5	sp|Q8NBI5|S43A3_HUMAN Solute carrier family 43 member 3 OS=Homo sapiens OX=9606 GN=SLC43A3 PE=1 SV=2	44	KDLCGPDAGPIGNATGQADCKAQDERFSLIF
0.1	Q96S37	sp|Q96S37|S22AC_HUMAN Solute carrier family 22 member 12 OS=Homo sapiens OX=9606 GN=SLC22A12 PE=1 SV=1	30	WLCTQSMLENFSAAVPSHRCWAPLLDNSTAQ
0.1	Q9UKG4	sp|Q9UKG4|S13A4_HUMAN Solute carrier family 13 member 4 OS=Homo sapiens OX=9606 GN=SLC13A4 PE=1 SV=2	248	RKQKLNRKYRSHHDQMICKCLSLSISYSATI
0.1	Q8N1Y9	sp|Q8N1Y9|YI025_HUMAN Putative uncharacterized protein FLJ37218 OS=Homo sapiens OX=9606 PE=5 SV=2	171	LECLGVVEGDPHVLCSTLSLSRPSPSATLTL
0.1	Q5GH70	sp|Q5GH70|XKR9_HUMAN XK-related protein 9 OS=Homo sapiens OX=9606 GN=XKR9 PE=2 SV=1	64	KADLKKAGQESQHCFLLLHCLQGGVFTRYWF
0.1	Q96IQ7	sp|Q96IQ7|VSIG2_HUMAN V-set and immunoglobulin domain-containing protein 2 OS=Homo sapiens OX=9606 GN=VSIG2 PE=1 SV=1	214	TYRCVATNQMGSASCELTLSVTEPSQGRVAG
0.1	P25942	sp|P25942|TNR5_HUMAN Tumor necrosis factor receptor superfamily member 5 OS=Homo sapiens OX=9606 GN=CD40 PE=1 SV=1	167	CETKDLVVQQAGTNKTDVVCGPQDRLRALVV
0.1	Q92544	sp|Q92544|TM9S4_HUMAN Transmembrane 9 superfamily member 4 OS=Homo sapiens OX=9606 GN=TM9SF4 PE=1 SV=2	420	YPGVVFGICFVLNCFIWGKHSSGAVPFPTMV
0.1	Q9NV64	sp|Q9NV64|TM39A_HUMAN Transmembrane protein 39A OS=Homo sapiens OX=9606 GN=TMEM39A PE=1 SV=1	182	SVLNLLFLGYPFGVYVPLCCFHQDSRAHLLL
0.1	P56557	sp|P56557|TM50B_HUMAN Transmembrane protein 50B OS=Homo sapiens OX=9606 GN=TMEM50B PE=1 SV=2	1	MAGFLDNFRWPECECIDWSERRNAVASVVAG
0.1	Q9NV29	sp|Q9NV29|TM100_HUMAN Transmembrane protein 100 OS=Homo sapiens OX=9606 GN=TMEM100 PE=1 SV=2	37	VSEIQLMAATGGTELSCYRCIIPFAVVVFIA
0.1	Q9H2B2	sp|Q9H2B2|SYT4_HUMAN Synaptotagmin-4 OS=Homo sapiens OX=9606 GN=SYT4 PE=1 SV=1	37	CCQRKSSKSNKTPPYKFVHVLKGVDIYPENL
0.1	P21579	sp|P21579|SYT1_HUMAN Synaptotagmin-1 OS=Homo sapiens OX=9606 GN=SYT1 PE=1 SV=1	80	CKKCLFKKKNKKKGKEKGGKNAINMKDVKDL
0.1	Q9NT68	sp|Q9NT68|TEN2_HUMAN Teneurin-2 OS=Homo sapiens OX=9606 GN=TENM2 PE=1 SV=3	356	TFSRKAFKLKKPSKYCSWKCAALSAIAAALL
0.1	Q969E2	sp|Q969E2|SCAM4_HUMAN Secretory carrier-associated membrane protein 4 OS=Homo sapiens OX=9606 GN=SCAMP4 PE=1 SV=1	69	TNFGLAFVWLLLFTPCGYVCWFRPVYKAFRA
0.1	Q8IZD6	sp|Q8IZD6|S22AF_HUMAN Solute carrier family 22 member 15 OS=Homo sapiens OX=9606 GN=SLC22A15 PE=2 SV=1	273	RKLKCTFSLTHPANRSCRETGSFLDLFRYRV
0.1	Q1EHB4	sp|Q1EHB4|SC5AC_HUMAN Sodium-coupled monocarboxylate transporter 2 OS=Homo sapiens OX=9606 GN=SLC5A12 PE=2 SV=2	154	TGFDLWGSVFATGIVCTFYCTLGGLKAVVWT
0.1	Q96IW7	sp|Q96IW7|SC22A_HUMAN Vesicle-trafficking protein SEC22a OS=Homo sapiens OX=9606 GN=SEC22A PE=1 SV=1	247	YYTGWRNVKSFLTFGLICLCNMYLYELRNLW
0.1	Q96EC8	sp|Q96EC8|YIPF6_HUMAN Protein YIPF6 OS=Homo sapiens OX=9606 GN=YIPF6 PE=1 SV=2	138	SKLLGGNISFFQSLCVLGYCILPLTVAMLIC
0.1	P78423	sp|P78423|X3CL1_HUMAN Fractalkine OS=Homo sapiens OX=9606 GN=CX3CL1 PE=1 SV=1	368	CPRKMAGEMAEGLRYIPRSCGSNSYVLVPV
0.1	Q8NBM4	sp|Q8NBM4|UBAC2_HUMAN Ubiquitin-associated domain-containing protein 2 OS=Homo sapiens OX=9606 GN=UBAC2 PE=1 SV=1	62	IICLDLKDTFCSSLLIYNFRIFERRYGSRKF
0.1	Q9UGT4	sp|Q9UGT4|SUSD2_HUMAN Sushi domain-containing protein 2 OS=Homo sapiens OX=9606 GN=SUSD2 PE=1 SV=1	759	GAETSTCQADGTWSSPTPKCQPGRSYAVLLG
0.1	O00206	sp|O00206|TLR4_HUMAN Toll-like receptor 4 OS=Homo sapiens OX=9606 GN=TLR4 PE=1 SV=2	608	ECATPSDKQGMPVLSLNITCQMNKTIIGVSV
0.1	Q9NS62	sp|Q9NS62|THSD1_HUMAN Thrombospondin type-1 domain-containing protein 1 OS=Homo sapiens OX=9606 GN=THSD1 PE=1 SV=1	384	ASLCSLEECAAFQPSSPSPLQPQGPVKSNNI
0.1	Q9NS93	sp|Q9NS93|TM7S3_HUMAN Transmembrane 7 superfamily member 3 OS=Homo sapiens OX=9606 GN=TM7SF3 PE=2 SV=1	267	AAYIPAHTYACSFEAGEGSCASLGRVSSKVF
0.1	Q8NBN3	sp|Q8NBN3|TM87A_HUMAN Transmembrane protein 87A OS=Homo sapiens OX=9606 GN=TMEM87A PE=1 SV=3	231	MVMCIVYVLFGVLWLAWSACYWRDLLRIQFW
0.1	Q9BX73	sp|Q9BX73|TM2D2_HUMAN TM2 domain-containing protein 2 OS=Homo sapiens OX=9606 GN=TM2D2 PE=1 SV=1	115	EHTSVQCHALDGIECASPRTFLRENKPCIKY
0.1	Q92854	sp|Q92854|SEM4D_HUMAN Semaphorin-4D OS=Homo sapiens OX=9606 GN=SEMA4D PE=1 SV=1	755	CYKGYLPRQCLKFRSALLIGKKKPKSDFCDR
0.1	Q9NY26	sp|Q9NY26|S39A1_HUMAN Zinc transporter ZIP1 OS=Homo sapiens OX=9606 GN=SLC39A1 PE=1 SV=1	39	VLTLLCSLVPICVLRRPGANHEGSASRQKAL
0.1	Q969S0	sp|Q969S0|S35B4_HUMAN UDP-xylose and UDP-N-acetylglucosamine transporter OS=Homo sapiens OX=9606 GN=SLC35B4 PE=1 SV=1	1	MRPALAVGLVFAGCCSNVIFLELLARKHPGC
0.1	Q5K4L6	sp|Q5K4L6|S27A3_HUMAN Solute carrier family 27 member 3 OS=Homo sapiens OX=9606 GN=SLC27A3 PE=1 SV=4	23	WPQLRWLPADLAFAVRALCCKRALRARALAA
0.1	O15244	sp|O15244|S22A2_HUMAN Solute carrier family 22 member 2 OS=Homo sapiens OX=9606 GN=SLC22A2 PE=1 SV=2	44	GFTPDHRCRSPGVAELSLRCGWSPAEELNYT
0.1	O75954	sp|O75954|TSN9_HUMAN Tetraspanin-9 OS=Homo sapiens OX=9606 GN=TSPAN9 PE=1 SV=1	62	TIVMVTGFLGCLGAIKENKCLLLSFFIVLLV
0.1	P56962	sp|P56962|STX17_HUMAN Syntaxin-17 OS=Homo sapiens OX=9606 GN=STX17 PE=1 SV=2	282	MMEKLTSSCPDLPSQTDKKCS
0.1	P35610	sp|P35610|SOAT1_HUMAN Sterol O-acyltransferase 1 OS=Homo sapiens OX=9606 GN=SOAT1 PE=1 SV=3	527	HCPLKNPTFLDYVRPRSWTCRYVF
0.1	Q8NHE4	sp|Q8NHE4|VA0E2_HUMAN V-type proton ATPase subunit e 2 OS=Homo sapiens OX=9606 GN=ATP6V0E2 PE=2 SV=1	29	PKGPNRGVIITMLVATAVCCYLFWLIAILAQ
0.1	Q9Y277	sp|Q9Y277|VDAC3_HUMAN Voltage-dependent anion-selective channel protein 3 OS=Homo sapiens OX=9606 GN=VDAC3 PE=1 SV=1	1	MCNTPTYCDLGKAAKDVFNKGYGFGMVKIDL
0.1	Q6P5X7	sp|Q6P5X7|TMM71_HUMAN Transmembrane protein 71 OS=Homo sapiens OX=9606 GN=TMEM71 PE=1 SV=2	249	CARWFMGEILASVFTCSLMITVAYVKSLFLS
0.1	Q9BYE2	sp|Q9BYE2|TMPSD_HUMAN Transmembrane protease serine 13 OS=Homo sapiens OX=9606 GN=TMPRSS13 PE=2 SV=5	192	HTGIRYKEQRESCPKHAVRCDGVVDCKLKSD
0.1	Q5BJH2	sp|Q5BJH2|TM128_HUMAN Transmembrane protein 128 OS=Homo sapiens OX=9606 GN=TMEM128 PE=1 SV=2	80	SWFLCGSALLLVSLSIAFYCIVYLEWYCGIG
0.1	Q6UXF1	sp|Q6UXF1|TM108_HUMAN Transmembrane protein 108 OS=Homo sapiens OX=9606 GN=TMEM108 PE=1 SV=2	489	VCCMKRKKKTANPENNLSYWNNTITMDYFNR
0.1	Q8NE00	sp|Q8NE00|TM104_HUMAN Transmembrane protein 104 OS=Homo sapiens OX=9606 GN=TMEM104 PE=1 SV=2	167	VPFSLMQVTCSATGNDSCGVEADTKYNDTDR
0.1	P46977	sp|P46977|STT3A_HUMAN Dolichyl-diphosphooligosaccharide--protein glycosyltransferase subunit STT3A OS=Homo sapiens OX=9606 GN=STT3A PE=1 SV=2	189	TGSICWAAKCALAYFYMVSSWGGYVFLINLI
0.1	Q9UBY0	sp|Q9UBY0|SL9A2_HUMAN Sodium/hydrogen exchanger 2 OS=Homo sapiens OX=9606 GN=SLC9A2 PE=2 SV=1	382	TVGKNHEWNWAFVCFTLAFCLMWRALGVFVL
0.1	Q08ET2	sp|Q08ET2|SIG14_HUMAN Sialic acid-binding Ig-like lectin 14 OS=Homo sapiens OX=9606 GN=SIGLEC14 PE=1 SV=1	329	HLSFILSVQRSSSSCICVTEKQQGSWPLVLT
0.1	Q68CR1	sp|Q68CR1|SE1L3_HUMAN Protein sel-1 homolog 3 OS=Homo sapiens OX=9606 GN=SEL1L3 PE=1 SV=2	1027	ERCWSHSNEESFSPCSLAWLYLHLRLLWGAI
0.1	Q8N357	sp|Q8N357|S35F6_HUMAN Solute carrier family 35 member F6 OS=Homo sapiens OX=9606 GN=SLC35F6 PE=1 SV=1	59	FSCLAAFYLLRCRAAGQSDSSVDPQQPFNPL
0.1	Q6ICL7	sp|Q6ICL7|S35E4_HUMAN Solute carrier family 35 member E4 OS=Homo sapiens OX=9606 GN=SLC35E4 PE=1 SV=1	93	ACHRGARRPMPGGTRCRVLLLSLTFGTSMAC
0.1	P45880	sp|P45880|VDAC2_HUMAN Voltage-dependent anion-selective channel protein 2 OS=Homo sapiens OX=9606 GN=VDAC2 PE=1 SV=2	7	TCARPMCIPPSYADLGKAARDIFNKGFGFGL
0.1	Q7Z5H4	sp|Q7Z5H4|VN1R5_HUMAN Vomeronasal type-1 receptor 5 OS=Homo sapiens OX=9606 GN=VN1R5 PE=2 SV=2	134	CTPCLLSVLQAIISPSIFSLAKLKHPSASHI
0.1	Q969M3	sp|Q969M3|YIPF5_HUMAN Protein YIPF5 OS=Homo sapiens OX=9606 GN=YIPF5 PE=1 SV=1	146	KIQFGYVYGISAIGCLGMFCLLNLMSMTGVS
0.1	O75204	sp|O75204|TM127_HUMAN Transmembrane protein 127 OS=Homo sapiens OX=9606 GN=TMEM127 PE=1 SV=1	100	CFLGILCSLSAFLLDVFGPKHPALKITRRYA
0.1	Q5GH72	sp|Q5GH72|XKR7_HUMAN XK-related protein 7 OS=Homo sapiens OX=9606 GN=XKR7 PE=2 SV=1	39	PPGVVGAGGPGPRYELRDCCWVLCALLVFFS
0.1	Q15849	sp|Q15849|UT2_HUMAN Urea transporter 2 OS=Homo sapiens OX=9606 GN=SLC14A2 PE=1 SV=3	366	WQTHLLALICALFCAYMEAAISNIMSVVGVP
0.1	Q9H1C4	sp|Q9H1C4|UN93B_HUMAN Protein unc-93 homolog B1 OS=Homo sapiens OX=9606 GN=UNC93B1 PE=1 SV=2	349	YSGFEVLFACTGIALGYGVCSVGLERLAYLL
0.1	O43914	sp|O43914|TYOBP_HUMAN TYRO protein tyrosine kinase-binding protein OS=Homo sapiens OX=9606 GN=TYROBP PE=1 SV=1	16	LLAVSGLRPVQAQAQSDCSCSTVSPGVLAGI
0.1	Q86WV6	sp|Q86WV6|STING_HUMAN Stimulator of interferon genes protein OS=Homo sapiens OX=9606 GN=STING1 PE=1 SV=1	72	HIHSRYRGSYWRTVRACLGCPLRRGALLLLS
0.1	Q9H2V7	sp|Q9H2V7|SPNS1_HUMAN Protein spinster homolog 1 OS=Homo sapiens OX=9606 GN=SPNS1 PE=1 SV=1	298	LLRSRVVLGETPPCLPGDSCSSSDSLIFGLI
0.1	Q8NBJ9	sp|Q8NBJ9|SIDT2_HUMAN SID1 transmembrane family member 2 OS=Homo sapiens OX=9606 GN=SIDT2 PE=1 SV=2	471	YQTVVNVTGNQDICYYNFLCAHPLGNLSAFN
0.1	Q9NXL6	sp|Q9NXL6|SIDT1_HUMAN SID1 transmembrane family member 1 OS=Homo sapiens OX=9606 GN=SIDT1 PE=2 SV=2	466	YQTVVNVTGNQDICYYNFLCAHPLGVLSAFN
0.1	Q8NBS3	sp|Q8NBS3|S4A11_HUMAN Sodium bicarbonate transporter-like protein 11 OS=Homo sapiens OX=9606 GN=SLC4A11 PE=1 SV=2	592	YQFKKSPYLHPCVREILSDCALPIAVLAFSL
0.1	Q9HAB3	sp|Q9HAB3|S52A2_HUMAN Solute carrier family 52	riboflavin transporter	member 2 OS=Homo sapiens OX=9606 GN=SLC52A2 PE=1 SV=1
0.1	P21817	sp|P21817|RYR1_HUMAN Ryanodine receptor 1 OS=Homo sapiens OX=9606 GN=RYR1 PE=1 SV=3	4864	YNKSEDEDEPDMKCDDMMTCYLFHMYVGVRA
0.1	Q9NWD8	sp|Q9NWD8|TM248_HUMAN Transmembrane protein 248 OS=Homo sapiens OX=9606 GN=TMEM248 PE=1 SV=1	158	ITFTLPTAWSSDDCALHGHCEQVVFTACMTL
0.1	Q9H2L4	sp|Q9H2L4|TMM60_HUMAN Transmembrane protein 60 OS=Homo sapiens OX=9606 GN=TMEM60 PE=1 SV=1	80	YLIAMLLKLAFCLALCAKLEQFTTMNLSYVF
0.1	Q5T7P6	sp|Q5T7P6|TMM78_HUMAN Transmembrane protein 78 OS=Homo sapiens OX=9606 GN=TMEM78 PE=2 SV=1	102	RQGLALSPRLECDGAIMIHCSLNIPGSSDPP
0.1	A0A1B0GUW6	sp|A0A1B0GUW6|SPEM3_HUMAN Uncharacterized protein SPEM3 OS=Homo sapiens OX=9606 GN=SPEM3 PE=3 SV=1	1	MGERAYHGAQVCSGTNPRKCQDLGDSILLLL
0.1	A0A2R8YCJ5	sp|A0A2R8YCJ5|SIM41_HUMAN Small integral membrane protein 41 OS=Homo sapiens OX=9606 GN=SMIM41 PE=3 SV=1	8	AAAQAAWLSSCCNQSASPPEPPEGPRAVQAV
0.1	Q9H1N7	sp|Q9H1N7|S35B3_HUMAN Adenosine 3'-phospho 5'-phosphosulfate transporter 2 OS=Homo sapiens OX=9606 GN=SLC35B3 PE=1 SV=1	167	LNYPTQVIFKCCKLIPVMLGGVFIQGKRYNV
0.1	Q6UXD7	sp|Q6UXD7|S49A3_HUMAN Solute carrier family 49 member A3 OS=Homo sapiens OX=9606 GN=SLC49A3 PE=1 SV=1	194	LMLGVYTIPAGVVCLLSTICLWESVPPTPPS
0.1	Q96H72	sp|Q96H72|S39AD_HUMAN Zinc transporter ZIP13 OS=Homo sapiens OX=9606 GN=SLC39A13 PE=1 SV=3	299	CTQSPKGVVGCSPAAEETAAWVLPFTSGGFL
0.1	Q9BQQ7	sp|Q9BQQ7|RTP3_HUMAN Receptor-transporting protein 3 OS=Homo sapiens OX=9606 GN=RTP3 PE=1 SV=1	189	VKPWASGENVYSYACQNHICRNLSIFCCCVI
0.1	Q9NRA2	sp|Q9NRA2|S17A5_HUMAN Sialin OS=Homo sapiens OX=9606 GN=SLC17A5 PE=1 SV=2	17	TDRTPLLPGAPRAEAAPVCCSARYNLAILAF
0.1	O15079	sp|O15079|SNPH_HUMAN Syntaphilin OS=Homo sapiens OX=9606 GN=SNPH PE=1 SV=2	446	SQRRQGQPIYNISSLLRGCCTVALHSIRRIS
0.1	Q8WV19	sp|Q8WV19|SFT2A_HUMAN Vesicle transport protein SFT2A OS=Homo sapiens OX=9606 GN=SFT2D1 PE=1 SV=1	33	RLKWFAICFVCGVFFSILGTGLLWLPGGIKL
0.1	Q8WVN6	sp|Q8WVN6|SCTM1_HUMAN Secreted and transmembrane protein 1 OS=Homo sapiens OX=9606 GN=SECTM1 PE=1 SV=2	166	FAWYRCRCSQQRREKKFFLLEPQMKVAALRA
0.1	Q5T1Q4	sp|Q5T1Q4|S35F1_HUMAN Solute carrier family 35 member F1 OS=Homo sapiens OX=9606 GN=SLC35F1 PE=1 SV=2	179	IRYKAVHFIGIVVCILGMGCMVGADVLVGRH
0.1	P32745	sp|P32745|SSR3_HUMAN Somatostatin receptor type 3 OS=Homo sapiens OX=9606 GN=SSTR3 PE=1 SV=1	264	ALFVLCWMPFYVLNIVNVVCPLPEEPAFFGL
0.1	O95473	sp|O95473|SNG4_HUMAN Synaptogyrin-4 OS=Homo sapiens OX=9606 GN=SYNGR4 PE=2 SV=2	47	QNKMESPQLHCILNSNSVACSFAVGAGFLAF
0.1	Q9NWF4	sp|Q9NWF4|S52A1_HUMAN Solute carrier family 52	riboflavin transporter	member 1 OS=Homo sapiens OX=9606 GN=SLC52A1 PE=1 SV=2
0.1	Q86U02	sp|Q86U02|CN165_HUMAN Putative uncharacterized protein encoded by LINC00596 OS=Homo sapiens OX=9606 GN=LINC00596 PE=5 SV=1	63	HWCNLGSLQPLPPGFKRFSCLSLPSSLDYRH
0.1	P58418	sp|P58418|CLRN1_HUMAN Clarin-1 OS=Homo sapiens OX=9606 GN=CLRN1 PE=1 SV=2	130	TLHGPLGLYLLSFISGSCGCLVMILFASEVK
0.1	O75508	sp|O75508|CLD11_HUMAN Claudin-11 OS=Homo sapiens OX=9606 GN=CLDN11 PE=1 SV=2	22	IVTTSTNDWVVTCGYTIPTCRKLDELGSKGL
0.1	Q96MX0	sp|Q96MX0|CKLF3_HUMAN CKLF-like MARVEL transmembrane domain-containing protein 3 OS=Homo sapiens OX=9606 GN=CMTM3 PE=1 SV=1	87	MQLNDKWQGLCWPMMDFLRCVTAALIYFAIS
0.1	Q8IX05	sp|Q8IX05|CD302_HUMAN CD302 antigen OS=Homo sapiens OX=9606 GN=CD302 PE=1 SV=1	139	KKGNCEVSSVEGTLCKTAIPYKRKYLSDNHI
0.1	P10966	sp|P10966|CD8B_HUMAN T-cell surface glycoprotein CD8 beta chain OS=Homo sapiens OX=9606 GN=CD8B PE=1 SV=1	149	TLKKRVCRLPRPETQKGPLCSPITLGLLVAG
0.1	Q07108	sp|Q07108|CD69_HUMAN Early activation antigen CD69 OS=Homo sapiens OX=9606 GN=CD69 PE=1 SV=1	66	YNCPGQYTFSMPSDSHVSSCSEDWVGYQRKC
0.1	Q6RW13	sp|Q6RW13|ATRAP_HUMAN Type-1 angiotensin II receptor-associated protein OS=Homo sapiens OX=9606 GN=AGTRAP PE=1 SV=1	85	GRFGVGMAILSLLLKPLSCCFVYHMYRERGG
0.1	P55916	sp|P55916|UCP3_HUMAN Mitochondrial uncoupling protein 3 OS=Homo sapiens OX=9606 GN=UCP3 PE=1 SV=1	211	HLLTDNFPCHFVSAFGAGFCATVVASPVDVV
0.1	Q687X5	sp|Q687X5|STEA4_HUMAN Metalloreductase STEAP4 OS=Homo sapiens OX=9606 GN=STEAP4 PE=1 SV=1	206	LSAVLCVFLFFYCVIRDVIYPYVYEKKDNTF
0.1	B2RUZ4	sp|B2RUZ4|SMIM1_HUMAN Small integral membrane protein 1 OS=Homo sapiens OX=9606 GN=SMIM1 PE=1 SV=1	24	GAVSSTEEASRCRRISQRLCTGKLGIAMKVL
0.1	Q9NPG4	sp|Q9NPG4|PCD12_HUMAN Protocadherin-12 OS=Homo sapiens OX=9606 GN=PCDH12 PE=1 SV=1	739	ICRTEKKDNRAYNCREAESTYRQQPKRPQKH
0.1	Q8NH92	sp|Q8NH92|OR1S1_HUMAN Olfactory receptor 1S1 OS=Homo sapiens OX=9606 GN=OR1S1 PE=3 SV=2	173	TLLLIQLLFCNHNTLPHFFCDLAPLLKLSCS
0.1	Q9HBG4	sp|Q9HBG4|VPP4_HUMAN V-type proton ATPase 116 kDa subunit a isoform 4 OS=Homo sapiens OX=9606 GN=ATP6V0A4 PE=1 SV=2	597	KWCCFDVHVSQHAPSILIHFINMFLFNYSDS
0.1	Q9Y5U5	sp|Q9Y5U5|TNR18_HUMAN Tumor necrosis factor receptor superfamily member 18 OS=Homo sapiens OX=9606 GN=TNFRSF18 PE=1 SV=1	134	CTQFGFLTVFPGNKTHNAVCVPGSPPAEPLG
0.1	O14836	sp|O14836|TR13B_HUMAN Tumor necrosis factor receptor superfamily member 13B OS=Homo sapiens OX=9606 GN=TNFRSF13B PE=1 SV=1	186	LKKRGDPCSCQPRSRPRQSPAKSSQDHAMEA
0.1	Q9UP52	sp|Q9UP52|TFR2_HUMAN Transferrin receptor protein 2 OS=Homo sapiens OX=9606 GN=TFR2 PE=1 SV=1	104	FRGSCQACGDSVLVVSEDVNYEPDLDFHQGR
0.1	Q5W0B7	sp|Q5W0B7|TM236_HUMAN Transmembrane protein 236 OS=Homo sapiens OX=9606 GN=TMEM236 PE=1 SV=1	91	MMCVVLTTLPCLTFSIAVTEVQKSINGSADV
0.1	P21731	sp|P21731|TA2R_HUMAN Thromboxane A2 receptor OS=Homo sapiens OX=9606 GN=TBXA2R PE=1 SV=3	87	SQHAALFEWHAVDPGCRLCRFMGVVMIFFGL
0.1	Q9NYW0	sp|Q9NYW0|T2R10_HUMAN Taste receptor type 2 member 10 OS=Homo sapiens OX=9606 GN=TAS2R10 PE=1 SV=3	27	IGLVNCIDCAKNKLSTIGFILTGLAISRIFL
0.1	Q6T423	sp|Q6T423|S22AP_HUMAN Solute carrier family 22 member 25 OS=Homo sapiens OX=9606 GN=SLC22A25 PE=2 SV=2	181	LQLAIVGTCAAFAPTILVYCSLRFLAGAATF
0.1	Q8IVM8	sp|Q8IVM8|S22A9_HUMAN Solute carrier family 22 member 9 OS=Homo sapiens OX=9606 GN=SLC22A9 PE=1 SV=1	170	FGRRFVLRWCYLQVAIVGTCAALAPTFLIYC
0.1	Q8WWT9	sp|Q8WWT9|S13A3_HUMAN Solute carrier family 13 member 3 OS=Homo sapiens OX=9606 GN=SLC13A3 PE=1 SV=1	37	KEGRCLFVILLMAVYWCTEALPLSVTALLPI
0.1	Q05940	sp|Q05940|VMAT2_HUMAN Synaptic vesicular amine transporter OS=Homo sapiens OX=9606 GN=SLC18A2 PE=1 SV=2	355	MGRWLCALLGMIIVGVSILCIPFAKNIYGLI
0.1	P54219	sp|P54219|VMAT1_HUMAN Chromaffin granule amine transporter OS=Homo sapiens OX=9606 GN=SLC18A1 PE=1 SV=1	363	MGRWLCSLIGMLVVGTSLLCVPLAHNIFGLI
0.1	Q9NZQ8	sp|Q9NZQ8|TRPM5_HUMAN Transient receptor potential cation channel subfamily M member 5 OS=Homo sapiens OX=9606 GN=TRPM5 PE=1 SV=1	806	NWNKCDMVAIFLFIVGVTCRMLPSAFEAGRT
0.1	E9PQX1	sp|E9PQX1|TM262_HUMAN Transmembrane protein 262 OS=Homo sapiens OX=9606 GN=TMEM262 PE=1 SV=1	65	ICWAAMGSLYAEMTENKYVCFSALTILMLNG
0.1	Q9NYW2	sp|Q9NYW2|TA2R8_HUMAN Taste receptor type 2 member 8 OS=Homo sapiens OX=9606 GN=TAS2R8 PE=1 SV=1	288	LNNKLRQTFVRMLTCRKIACMI
0.1	Q9BXJ8	sp|Q9BXJ8|TACAN_HUMAN Ion channel TACAN OS=Homo sapiens OX=9606 GN=TMEM120A PE=1 SV=1	294	FNLAQDPQCKEWQVLMCGFPFLLLFLGNFFT
0.1	P08247	sp|P08247|SYPH_HUMAN Synaptophysin OS=Homo sapiens OX=9606 GN=SYP PE=1 SV=3	171	TDPENIIKEMPVCRQTGNTCKELRDPVTSGL
0.1	Q4G0N8	sp|Q4G0N8|SL9C1_HUMAN Sodium/hydrogen exchanger 10 OS=Homo sapiens OX=9606 GN=SLC9C1 PE=2 SV=2	425	ILGLRDATSTKYKSVCCTFQHFQELTKSAAS
0.1	Q8NFR3	sp|Q8NFR3|SPTSB_HUMAN Serine palmitoyltransferase small subunit B OS=Homo sapiens OX=9606 GN=SPTSSB PE=1 SV=1	7	KEYFSWLYYQYQIISCCAVLEPWERSMFNTI
0.1	Q8TAC9	sp|Q8TAC9|SCAM5_HUMAN Secretory carrier-associated membrane protein 5 OS=Homo sapiens OX=9606 GN=SCAMP5 PE=1 SV=1	69	TNFGLAFLWLILFTPCSYVCWFRPIYKAFKT
0.1	Q6ZSY5	sp|Q6ZSY5|PPR3F_HUMAN Protein phosphatase 1 regulatory subunit 3F OS=Homo sapiens OX=9606 GN=PPP1R3F PE=1 SV=3	739	PKKSPTLAVPAECVCALPPQLRGPLTQTLGV
0.1	Q9ULK5	sp|Q9ULK5|VANG2_HUMAN Vang-like protein 2 OS=Homo sapiens OX=9606 GN=VANGL2 PE=1 SV=2	129	LPPLLWREELEPCGTACEGLFISVAFKLLIL
0.1	Q07011	sp|Q07011|TNR9_HUMAN Tumor necrosis factor receptor superfamily member 9 OS=Homo sapiens OX=9606 GN=TNFRSF9 PE=1 SV=1	224	FKQPFMRPVQTTQEEDGCSCRFPEEEEGGCE
0.1	Q01973	sp|Q01973|ROR1_HUMAN Inactive tyrosine-protein kinase transmembrane receptor ROR1 OS=Homo sapiens OX=9606 GN=ROR1 PE=1 SV=2	377	LDENFKSDLCDIPACDSKDSKEKNKMEILYI
0.1	Q15399	sp|Q15399|TLR1_HUMAN Toll-like receptor 1 OS=Homo sapiens OX=9606 GN=TLR1 PE=1 SV=3	601	CSYLDLPWYLRMVCQWTQTRRRARNIPLEEL
0.1	P35590	sp|P35590|TIE1_HUMAN Tyrosine-protein kinase receptor Tie-1 OS=Homo sapiens OX=9606 GN=TIE1 PE=1 SV=1	784	VCIRRSCLHRRRTFTYQSGSGEETILQFSSG
0.1	Q14656	sp|Q14656|TM187_HUMAN Transmembrane protein 187 OS=Homo sapiens OX=9606 GN=TMEM187 PE=1 SV=1	210	CDHQLARWRLFQCLTGHFWSKVCDVLQFHFA
0.1	Q9BZW5	sp|Q9BZW5|TM6S1_HUMAN Transmembrane 6 superfamily member 1 OS=Homo sapiens OX=9606 GN=TM6SF1 PE=1 SV=2	160	VGKYGTRICPAFFLSIPYTCLPVWAGFRIYN
0.1	Q6UE05	sp|Q6UE05|TM270_HUMAN Transmembrane protein 270 OS=Homo sapiens OX=9606 GN=TMEM270 PE=2 SV=2	52	QEARGSCNWQAHLPLGAAACPLGQALWAGLA
0.1	P59533	sp|P59533|T2R38_HUMAN Taste receptor type 2 member 38 OS=Homo sapiens OX=9606 GN=TAS2R38 PE=2 SV=3	40	NFWDVVKRQALSNSDCVLLCLSISRLFLHGL
0.1	Q9P1P4	sp|Q9P1P4|TAAR3_HUMAN Putative trace amine-associated receptor 3 OS=Homo sapiens OX=9606 GN=TAAR3P PE=5 SV=1	11	SSCPKFVNKILSSHQPLFSCPGDNVFGYDWS
0.1	Q9NYW1	sp|Q9NYW1|TA2R9_HUMAN Taste receptor type 2 member 9 OS=Homo sapiens OX=9606 GN=TAS2R9 PE=1 SV=1	41	ISLIDIILISLAISRICLLCVISLDGFFMLL
0.1	Q9NQ40	sp|Q9NQ40|S52A3_HUMAN Solute carrier family 52	riboflavin transporter	member 3 OS=Homo sapiens OX=9606 GN=SLC52A3 PE=1 SV=4
0.1	Q96QD8	sp|Q96QD8|S38A2_HUMAN Sodium-coupled neutral amino acid transporter 2 OS=Homo sapiens OX=9606 GN=SLC38A2 PE=1 SV=2	219	GYTSGLSLLCMVFFLIVVICKKFQVPCPVEA
0.1	Q15413	sp|Q15413|RYR3_HUMAN Ryanodine receptor 3 OS=Homo sapiens OX=9606 GN=RYR3 PE=1 SV=3	4696	YNKSEDDDEPDMKCDDMMTCYLFHMYVGVRA
0.1	Q6P5S7	sp|Q6P5S7|RNK_HUMAN Ribonuclease kappa OS=Homo sapiens OX=9606 GN=RNASEK PE=1 SV=2	27	SPLAPRRSPTPFFMASLLCCGPKLAACGIVL
0.1	Q9UN66	sp|Q9UN66|PCDB8_HUMAN Protocadherin beta-8 OS=Homo sapiens OX=9606 GN=PCDHB8 PE=2 SV=4	710	VAVLLCRRSRAASVGRCSVPEGPFPGHLVDV
0.1	Q9Y5F1	sp|Q9Y5F1|PCDBC_HUMAN Protocadherin beta-12 OS=Homo sapiens OX=9606 GN=PCDHB12 PE=1 SV=1	711	VRLCRRSRAAPVGRCSVPEGPFPGHLVDVSG
0.1	C9JQI7	sp|C9JQI7|TM232_HUMAN Transmembrane protein 232 OS=Homo sapiens OX=9606 GN=TMEM232 PE=2 SV=2	138	FFVAESVLYRLCCDASLKTYLYSVEIKLAKI
0.1	O43581	sp|O43581|SYT7_HUMAN Synaptotagmin-7 OS=Homo sapiens OX=9606 GN=SYT7 PE=1 SV=3	37	LCHWCQRKLGKRYKNSLETVGTPDSGRGRSE
0.1	Q8NB59	sp|Q8NB59|SYT14_HUMAN Synaptotagmin-14 OS=Homo sapiens OX=9606 GN=SYT14 PE=1 SV=2	1	MAIEGGERTCGVHELICIRKVSPEAVGFLSA
0.1	Q7L0J3	sp|Q7L0J3|SV2A_HUMAN Synaptic vesicle glycoprotein 2A OS=Homo sapiens OX=9606 GN=SV2A PE=1 SV=1	620	DKIGRLRMLAGSSVMSCVSCFFLSFGNSESA
0.1	Q04912	sp|Q04912|RON_HUMAN Macrophage-stimulating protein receptor OS=Homo sapiens OX=9606 GN=MST1R PE=1 SV=3	928	GAPLQVCVDGECHILGRVVRPGPDGVPQSTL
0.1	Q9H720	sp|Q9H720|PG2IP_HUMAN PGAP2-interacting protein OS=Homo sapiens OX=9606 GN=CWH43 PE=2 SV=2	243	LCLASGLMLPSCLWFRGTGLIWWVTGTASAA
0.1	Q15612	sp|Q15612|OR1Q1_HUMAN Olfactory receptor 1Q1 OS=Homo sapiens OX=9606 GN=OR1Q1 PE=2 SV=3	87	SPTKVISYTGCLAQTYFFICFAVMENFILAV
0.1	P0DMS9	sp|P0DMS9|TMIG3_HUMAN Transmembrane domain-containing protein TMIGD3 OS=Homo sapiens OX=9606 GN=TMIGD3 PE=1 SV=1	26	WTLGCLSPESQFRIPGLPGCILSFQLKVCFL
0.1	Q96B21	sp|Q96B21|TM45B_HUMAN Transmembrane protein 45B OS=Homo sapiens OX=9606 GN=TMEM45B PE=1 SV=1	201	TPEWDQKDDANLMFITMCFCWHYLAALSIVA
0.1	Q8N394	sp|Q8N394|TMTC2_HUMAN Protein O-mannosyl-transferase TMTC2 OS=Homo sapiens OX=9606 GN=TMTC2 PE=1 SV=1	153	LCYIKHCSTRGYSARTWGWFLGSGLCAGCSM
0.1	O43291	sp|O43291|SPIT2_HUMAN Kunitz-type protease inhibitor 2 OS=Homo sapiens OX=9606 GN=SPINT2 PE=1 SV=2	168	GNKNSYRSEEACMLRCFRQQENPPLPLGSKV
0.1	Q6ZPB5	sp|Q6ZPB5|SDIM1_HUMAN Stress-responsive DNAJB4-interacting membrane protein 1 OS=Homo sapiens OX=9606 GN=SDIM1 PE=1 SV=2	87	ISSCGFSQVFWPVEAFCSFSLSFFALALSHK
0.1	Q8IZM9	sp|Q8IZM9|S38A6_HUMAN Probable sodium-coupled neutral amino acid transporter 6 OS=Homo sapiens OX=9606 GN=SLC38A6 PE=1 SV=2	258	FSFLCHTSILPIYCELQSPSKKRMQNVTNTA
0.1	Q8NG04	sp|Q8NG04|S2610_HUMAN Solute carrier family 26 member 10 OS=Homo sapiens OX=9606 GN=SLC26A10 PE=2 SV=1	374	YLPKAVLACINISSMRQVFCQMQELPQLWHI
0.1	Q8IVJ1	sp|Q8IVJ1|S41A1_HUMAN Solute carrier family 41 member 1 OS=Homo sapiens OX=9606 GN=SLC41A1 PE=1 SV=2	377	MNGMPGENSEQAPRRCPSPCTTFFSPDVNSR
0.1	Q9NTN3	sp|Q9NTN3|S35D1_HUMAN UDP-glucuronic acid/UDP-N-acetylgalactosamine transporter OS=Homo sapiens OX=9606 GN=SLC35D1 PE=2 SV=1	276	CTQYNSALTTTIVGCIKNILITYIGMVFGGD
0.1	Q8TE54	sp|Q8TE54|S26A7_HUMAN Anion exchange transporter OS=Homo sapiens OX=9606 GN=SLC26A7 PE=2 SV=2	256	KVVLPVDLVLIIAASFACYCTNMENTYGLEV
0.1	O75751	sp|O75751|S22A3_HUMAN Solute carrier family 22 member 3 OS=Homo sapiens OX=9606 GN=SLC22A3 PE=1 SV=1	44	TQPDHYWCRGPSAAALAERCGWSPEEEWNRT
0.1	Q96RD7	sp|Q96RD7|PANX1_HUMAN Pannexin-1 OS=Homo sapiens OX=9606 GN=PANX1 PE=1 SV=4	65	SCFSPSSFSWRQAAFVDSYCWAAVQQKNSLQ
0.1	Q6UW60	sp|Q6UW60|PCSK4_HUMAN Proprotein convertase subtilisin/kexin type 4 OS=Homo sapiens OX=9606 GN=PCSK4 PE=1 SV=2	681	GSCMGPTTPDSRPRLRAAACPHHRCPASAMV
0.1	Q9Y5E7	sp|Q9Y5E7|PCDB2_HUMAN Protocadherin beta-2 OS=Homo sapiens OX=9606 GN=PCDHB2 PE=1 SV=1	713	VRLCRRSRAASVGRCSVPEGPFPGQMVDVSG
0.1	P55851	sp|P55851|UCP2_HUMAN Mitochondrial uncoupling protein 2 OS=Homo sapiens OX=9606 GN=UCP2 PE=1 SV=1	208	NLMTDDLPCHFTSAFGAGFCTTVIASPVDVV
0.1	Q9UKP6	sp|Q9UKP6|UR2R_HUMAN Urotensin-2 receptor OS=Homo sapiens OX=9606 GN=UTS2R PE=1 SV=1	290	PRTARIVNYLTTCLTYGNSCANPFLYTLLTR
0.1	O00322	sp|O00322|UPK1A_HUMAN Uroplakin-1a OS=Homo sapiens OX=9606 GN=UPK1A PE=1 SV=1	92	MVLTYLVLMLIVYIFECASCITSYTHRDYMV
0.1	Q9HC21	sp|Q9HC21|TPC_HUMAN Mitochondrial thiamine pyrophosphate carrier OS=Homo sapiens OX=9606 GN=SLC25A19 PE=1 SV=1	111	SVYDAREFSVHFVCGGLAACMATLTVHPVDV
0.1	O60602	sp|O60602|TLR5_HUMAN Toll-like receptor 5 OS=Homo sapiens OX=9606 GN=TLR5 PE=1 SV=4	610	CVYPDSFSGVSLFSLSTEGCDEEEVLKSLKF
0.1	Q68D42	sp|Q68D42|TM215_HUMAN Transmembrane protein 215 OS=Homo sapiens OX=9606 GN=TMEM215 PE=2 SV=1	63	TEGCTKWPENELLWVRKLPCFRKPKDKEVVE
0.1	Q9P2C4	sp|Q9P2C4|TM181_HUMAN Transmembrane protein 181 OS=Homo sapiens OX=9606 GN=TMEM181 PE=1 SV=2	247	MYIHNKVHNRTRTLTCAGKCAEIIVAHLGYL
0.1	Q96AQ2	sp|Q96AQ2|TM125_HUMAN Transmembrane protein 125 OS=Homo sapiens OX=9606 GN=TMEM125 PE=2 SV=1	167	LYQVGVSGHCPSICMATPSTHSGHGGHGSIF
0.1	Q8N4L1	sp|Q8N4L1|T151A_HUMAN Transmembrane protein 151A OS=Homo sapiens OX=9606 GN=TMEM151A PE=2 SV=1	26	QRPLKQSLGSSLCRESHWKCLLLTLLIHACG
0.1	Q8IXX5	sp|Q8IXX5|T183A_HUMAN Transmembrane protein 183A OS=Homo sapiens OX=9606 GN=TMEM183A PE=1 SV=2	274	GLQPPVQYEDVHTNPDQDCCLLQVTTLNFIF
0.1	Q8N816	sp|Q8N816|TMM99_HUMAN Transmembrane protein 99 OS=Homo sapiens OX=9606 GN=TMEM99 PE=2 SV=2	68	WLSLELFSFLRYLGTLLCACGHRLREGLLLP
0.1	A6NLX4	sp|A6NLX4|TM210_HUMAN Transmembrane protein 210 OS=Homo sapiens OX=9606 GN=TMEM210 PE=3 SV=1	18	LTYLSLLLIPAAAGTYCECSLGLSREALIAL
0.1	Q6UXY8	sp|Q6UXY8|TMC5_HUMAN Transmembrane channel-like protein 5 OS=Homo sapiens OX=9606 GN=TMC5 PE=2 SV=3	625	VSTGVAIACCAAVYYLAEYNLEFLKTHSNPG
0.1	Q5SNT2	sp|Q5SNT2|TM201_HUMAN Transmembrane protein 201 OS=Homo sapiens OX=9606 GN=TMEM201 PE=1 SV=1	318	IRLRRIDAFCTCLWALLLGLHLAEQHLQAAS
0.1	Q96B42	sp|Q96B42|TMM18_HUMAN Transmembrane protein 18 OS=Homo sapiens OX=9606 GN=TMEM18 PE=1 SV=2	46	SRSYRLQIGHFLCLVILVYCAEYINEAAAMN
0.1	Q7Z5S9	sp|Q7Z5S9|TM144_HUMAN Transmembrane protein 144 OS=Homo sapiens OX=9606 GN=TMEM144 PE=1 SV=1	59	LHCPKFWPFAMLGGCIWATGNIAVVPIIKTI
0.1	Q8NCS4	sp|Q8NCS4|TM35B_HUMAN Transmembrane protein 35B OS=Homo sapiens OX=9606 GN=TMEM35B PE=1 SV=1	105	LKESLSTCIPAIVCLGFLLLLNVGQLLAQTK
0.1	Q96HH4	sp|Q96HH4|TM169_HUMAN Transmembrane protein 169 OS=Homo sapiens OX=9606 GN=TMEM169 PE=2 SV=1	190	IFLVYNEERTFWHKISYCPCLVLFYPVLIMA
0.1	Q8WU17	sp|Q8WU17|RN139_HUMAN E3 ubiquitin-protein ligase RNF139 OS=Homo sapiens OX=9606 GN=RNF139 PE=1 SV=1	266	FFISWDDFWDLICNLIISGCDSTLTVLGMSA
0.1	O96011	sp|O96011|PX11B_HUMAN Peroxisomal membrane protein 11B OS=Homo sapiens OX=9606 GN=PEX11B PE=1 SV=1	211	VVRNACDLFIPLDKLGLWRCGPGIVGLCGLV
0.1	Q969Z4	sp|Q969Z4|TR19L_HUMAN Tumor necrosis factor receptor superfamily member 19L OS=Homo sapiens OX=9606 GN=RELT PE=1 SV=1	183	CNLLKRKGYHCTAHKEVGPGPGGGGSGINPA
0.1	Q9BX74	sp|Q9BX74|TM2D1_HUMAN TM2 domain-containing protein 1 OS=Homo sapiens OX=9606 GN=TM2D1 PE=1 SV=1	138	RFYLGYPALGLLKFCTVGFCGIGSLIDFILI
0.1	O95807	sp|O95807|TM50A_HUMAN Transmembrane protein 50A OS=Homo sapiens OX=9606 GN=TMEM50A PE=1 SV=1	1	MSGFLEGLRCSECIDWGEKRNTIASIAAGVL
0.1	P41587	sp|P41587|VIPR2_HUMAN Vasoactive intestinal polypeptide receptor 2 OS=Homo sapiens OX=9606 GN=VIPR2 PE=1 SV=2	137	SLMSLATGSIILCLFRKLHCTRNYIHLNLFL
0.1	O14817	sp|O14817|TSN4_HUMAN Tetraspanin-4 OS=Homo sapiens OX=9606 GN=TSPAN4 PE=1 SV=1	62	AFVMAIGFVGCLGAIKENKCLLLTFFLLLLL
0.1	O14763	sp|O14763|TR10B_HUMAN Tumor necrosis factor receptor superfamily member 10B OS=Homo sapiens OX=9606 GN=TNFRSF10B PE=1 SV=2	231	VCKSLLWKKVLPYLKGICSGGGGDPERVDRS
0.1	Q9UBN4	sp|Q9UBN4|TRPC4_HUMAN Short transient receptor potential channel 4 OS=Homo sapiens OX=9606 GN=TRPC4 PE=1 SV=1	333	CFIIGLLFPVFSVCYLIAPKSPLGLFIRKPF
0.1	O15455	sp|O15455|TLR3_HUMAN Toll-like receptor 3 OS=Homo sapiens OX=9606 GN=TLR3 PE=1 SV=1	677	CNTPPHYHGFPVRLFDTSSCKDSAPFELFFM
0.1	Q6PEY1	sp|Q6PEY1|TMM88_HUMAN Transmembrane protein 88 OS=Homo sapiens OX=9606 GN=TMEM88 PE=1 SV=1	13	GDGPEPRDPLDCWACAVLVTAQNLLVAAFNL
0.1	Q69YG0	sp|Q69YG0|TMM42_HUMAN Transmembrane protein 42 OS=Homo sapiens OX=9606 GN=TMEM42 PE=1 SV=2	29	QAGAMRRRFWGVFNCLCAGAFGALAAASAKL
0.1	Q9BRN9	sp|Q9BRN9|TM2D3_HUMAN TM2 domain-containing protein 3 OS=Homo sapiens OX=9606 GN=TM2D3 PE=2 SV=2	150	PRQRYPANCTVRDHVHCLGNRTFPKMLYCNW
0.1	Q9P1P5	sp|Q9P1P5|TAAR2_HUMAN Trace amine-associated receptor 2 OS=Homo sapiens OX=9606 GN=TAAR2 PE=2 SV=2	19	KKEKFNCSEYGNRSCPENERSLGVRVAMYSF
0.1	Q6NXT4	sp|Q6NXT4|ZNT6_HUMAN Zinc transporter 6 OS=Homo sapiens OX=9606 GN=SLC30A6 PE=1 SV=2	35	LLFGVINLICTGFLLMWCSSTNSIALTAYTY
0.1	Q7RTX1	sp|Q7RTX1|TS1R1_HUMAN Taste receptor type 1 member 1 OS=Homo sapiens OX=9606 GN=TAS1R1 PE=2 SV=1	538	PCGKEEWAPEGSQTCFPRTVVFLALREHTSW
0.1	Q8N614	sp|Q8N614|TM156_HUMAN Transmembrane protein 156 OS=Homo sapiens OX=9606 GN=TMEM156 PE=2 SV=2	25	FKTPKERTLELSCLEVCLQSNFTYSLSSLNF
0.1	Q96FV3	sp|Q96FV3|TSN17_HUMAN Tetraspanin-17 OS=Homo sapiens OX=9606 GN=TSPAN17 PE=2 SV=2	1	MPGKHQHFQEPEVGCCGKYFLFGFNIVFWVL
0.1	Q9BX84	sp|Q9BX84|TRPM6_HUMAN Transient receptor potential cation channel subfamily M member 6 OS=Homo sapiens OX=9606 GN=TRPM6 PE=1 SV=2	1020	MIYGEVYAGEIDVCSSQPSCPPGSFLTPFLQ
0.1	Q7Z4N2	sp|Q7Z4N2|TRPM1_HUMAN Transient receptor potential cation channel subfamily M member 1 OS=Homo sapiens OX=9606 GN=TRPM1 PE=1 SV=2	1026	INPPCGENLYDEEGKRLPPCIPGAWLTPALM
0.1	Q8NCL8	sp|Q8NCL8|TM116_HUMAN Transmembrane protein 116 OS=Homo sapiens OX=9606 GN=TMEM116 PE=2 SV=1	3	HTQSGQSTSPLVIDYTCRVCQMAFVFSSLIP
0.1	P59540	sp|P59540|T2R46_HUMAN Taste receptor type 2 member 46 OS=Homo sapiens OX=9606 GN=TAS2R46 PE=2 SV=2	199	ICSLCKHLKKMQLHGKGSQDPSMKVHIKALQ
0.1	P59539	sp|P59539|T2R45_HUMAN Taste receptor type 2 member 45 OS=Homo sapiens OX=9606 GN=TAS2R45 PE=2 SV=1	199	VCSLCKHLKKMQLHGKGSQDPSTKVHIKVLQ
0.1	O75841	sp|O75841|UPK1B_HUMAN Uroplakin-1b OS=Homo sapiens OX=9606 GN=UPK1B PE=1 SV=5	57	GAAWIGIFVGICLFCLSVLGIVGIMKSSRKI
0.1	Q7Z2W7	sp|Q7Z2W7|TRPM8_HUMAN Transient receptor potential cation channel subfamily M member 8 OS=Homo sapiens OX=9606 GN=TRPM8 PE=1 SV=2	929	CTFTGNESKPLCVELDEHNLPRFPEWITIPL
0.1	A1L157	sp|A1L157|TSN11_HUMAN Tetraspanin-11 OS=Homo sapiens OX=9606 GN=TSPAN11 PE=2 SV=2	83	LWERKGCLSTYFCLLLVIFLVELVAGVLAHV
0.1	Q86UB9	sp|Q86UB9|TM135_HUMAN Transmembrane protein 135 OS=Homo sapiens OX=9606 GN=TMEM135 PE=2 SV=2	268	IQCCLRIPSAFRHLFTQPSRLLSLFYNKENF
0.1	Q9NYV8	sp|Q9NYV8|T2R14_HUMAN Taste receptor type 2 member 14 OS=Homo sapiens OX=9606 GN=TAS2R14 PE=1 SV=1	259	ENLIILSQVMGMAYPSCHSCVLILGNKKLRQ
0.1	Q6ZT21	sp|Q6ZT21|TMPPE_HUMAN Transmembrane protein with metallophosphoesterase domain OS=Homo sapiens OX=9606 GN=TMPPE PE=1 SV=2	63	IWRSTVSNLCHSPAAESTCFQLWKVVVLAFL
0.1	Q5VYP0	sp|Q5VYP0|S31A3_HUMAN Spermatogenesis-associated protein 31A3 OS=Homo sapiens OX=9606 GN=SPATA31A3 PE=2 SV=1	45	YLSYFRCDDPPSPSPGKRKCPVGRRRRPRGR
0.1	Q01959	sp|Q01959|SC6A3_HUMAN Sodium-dependent dopamine transporter OS=Homo sapiens OX=9606 GN=SLC6A3 PE=1 SV=1	170	SFTTELPWIHCNNSWNSPNCSDAHPGDSSGD
0.1	E5RIL1	sp|E5RIL1|UPKL2_HUMAN Uroplakin-3b-like protein 2 OS=Homo sapiens OX=9606 GN=UPK3BL2 PE=3 SV=2	225	IYTCFNSCRSTSLSGPEEAGSVRRYTTHLAF
0.1	Q96QT4	sp|Q96QT4|TRPM7_HUMAN Transient receptor potential cation channel subfamily M member 7 OS=Homo sapiens OX=9606 GN=TRPM7 PE=1 SV=1	1047	EVYAYEIDVCANDSVIPQICGPGTWLTPFLQ
0.1	Q8NHX9	sp|Q8NHX9|TPC2_HUMAN Two pore calcium channel protein 2 OS=Homo sapiens OX=9606 GN=TPCN2 PE=1 SV=2	113	YRAAPWEPPCGLTESVEVLCLLVFAADLSVK
0.1	Q6UW68	sp|Q6UW68|TM205_HUMAN Transmembrane protein 205 OS=Homo sapiens OX=9606 GN=TMEM205 PE=1 SV=1	51	SKLFPFYFHISMGCAFINLCILASQHAWAQL
0.1	Q0P6H9	sp|Q0P6H9|TMM62_HUMAN Transmembrane protein 62 OS=Homo sapiens OX=9606 GN=TMEM62 PE=1 SV=1	501	GEIIDGKFGCCFSFGIFVNGHFLQGSITFII
0.1	Q9BQJ4	sp|Q9BQJ4|TMM47_HUMAN Transmembrane protein 47 OS=Homo sapiens OX=9606 GN=TMEM47 PE=1 SV=1	50	YYLSLWESCRKPASLDIWHCESTLSSDWQIA
0.1	Q8WWA1	sp|Q8WWA1|TMM40_HUMAN Transmembrane protein 40 OS=Homo sapiens OX=9606 GN=TMEM40 PE=1 SV=2	157	DDEFFHFVLLCFAIGALLVCYHYYADWFMSL
0.1	Q8N2M4	sp|Q8N2M4|TM86A_HUMAN Lysoplasmalogenase-like protein TMEM86A OS=Homo sapiens OX=9606 GN=TMEM86A PE=1 SV=1	42	IKCLPIFCLWLFLLAHGLGFLLAHPSATRIF
0.1	Q5JRV8	sp|Q5JRV8|T255A_HUMAN Transmembrane protein 255A OS=Homo sapiens OX=9606 GN=TMEM255A PE=2 SV=1	87	QMLVASIVFISFGVIAAFCCAIVDGVFAARH
0.1	Q8N2H4	sp|Q8N2H4|SYS1_HUMAN Protein SYS1 homolog OS=Homo sapiens OX=9606 GN=SYS1 PE=1 SV=1	87	RGKQCLDFTVTVHFFHLLGCWFYSSRFPSAL
0.1	Q7Z5H5	sp|Q7Z5H5|VN1R4_HUMAN Vomeronasal type-1 receptor 4 OS=Homo sapiens OX=9606 GN=VN1R4 PE=2 SV=2	26	LLHYLSFYCTGCRLRSTDLIVKHLIVANFLA
0.1	Q8TBR7	sp|Q8TBR7|TLC3A_HUMAN TLC domain-containing protein 3A OS=Homo sapiens OX=9606 GN=TLCD3A PE=1 SV=2	16	FALCTWALRRSQPGWSRTDCVMISTRLVSSV
0.1	A6NGB7	sp|A6NGB7|TM221_HUMAN Transmembrane protein 221 OS=Homo sapiens OX=9606 GN=TMEM221 PE=4 SV=3	123	LGLFCCGISVYLAALSIYALLLFEIETGAAA
0.1	P32971	sp|P32971|TNFL8_HUMAN Tumor necrosis factor ligand superfamily member 8 OS=Homo sapiens OX=9606 GN=TNFSF8 PE=1 SV=1	69	PNSPDNVPLKGGNCSEDLLCILKRAPFKKSW
0.1	Q9H6X4	sp|Q9H6X4|TM134_HUMAN Transmembrane protein 134 OS=Homo sapiens OX=9606 GN=TMEM134 PE=1 SV=1	93	SFSTISSSTQRSYNTCCSWTQHPLIQKNRRV
0.1	Q6NXT6	sp|Q6NXT6|TAPT1_HUMAN Transmembrane anterior posterior transformation protein 1 homolog OS=Homo sapiens OX=9606 GN=TAPT1 PE=1 SV=1	142	LTLPCYGLRDRRLLQPAQVCDILKGVILVIC
0.1	Q8N6L7	sp|Q8N6L7|TM252_HUMAN Transmembrane protein 252 OS=Homo sapiens OX=9606 GN=TMEM252 PE=1 SV=1	10	CALALLMGFLMVCLGAFFISWGSIFDCQGSL
0.1	Q8WV15	sp|Q8WV15|T255B_HUMAN Transmembrane protein 255B OS=Homo sapiens OX=9606 GN=TMEM255B PE=1 SV=1	83	QMLVAAIVFISFGVVAAFCCAIVDGVFAAQH
0.1	Q53R12	sp|Q53R12|T4S20_HUMAN Transmembrane 4 L6 family member 20 OS=Homo sapiens OX=9606 GN=TM4SF20 PE=1 SV=1	65	ATTMSLTARKRACCNNRTGMFLSSLFSVITV
0.1	P59541	sp|P59541|T2R30_HUMAN Taste receptor type 2 member 30 OS=Homo sapiens OX=9606 GN=TAS2R30 PE=2 SV=3	199	ICSLCKHLKKMQLHGKGSQDPSTKVHIKALQ
0.1	Q86TL2	sp|Q86TL2|STIMA_HUMAN Store-operated calcium entry regulator STIMATE OS=Homo sapiens OX=9606 GN=STIMATE PE=1 SV=1	136	SLRFGEYGDPLQCGAWVGQCALYIVIMIFEK
0.1	Q9Y3P8	sp|Q9Y3P8|SIT1_HUMAN Signaling threshold-regulating transmembrane adapter 1 OS=Homo sapiens OX=9606 GN=SIT1 PE=1 SV=1	11	VCLWTLTSAAMSRGDNCTDLLALGIPSITQA
0.1	Q9H2H9	sp|Q9H2H9|S38A1_HUMAN Sodium-coupled neutral amino acid transporter 1 OS=Homo sapiens OX=9606 GN=SLC38A1 PE=1 SV=1	118	SINLLLICSKETGCMVYEKLGEQVFGTTGKF
0.1	Q9NSA0	sp|Q9NSA0|S22AB_HUMAN Solute carrier family 22 member 11 OS=Homo sapiens OX=9606 GN=SLC22A11 PE=1 SV=1	163	LSYRFGRKPMLSWCCLQLAVAGTSTIFAPTF
0.1	Q9H1V8	sp|Q9H1V8|S6A17_HUMAN Sodium-dependent neutral amino acid transporter SLC6A17 OS=Homo sapiens OX=9606 GN=SLC6A17 PE=1 SV=3	128	SIGVWHYICPRLGGIGFSSCIVCLFVGLYYN
0.1	Q5BKX6	sp|Q5BKX6|S45A4_HUMAN Solute carrier family 45 member 4 OS=Homo sapiens OX=9606 GN=SLC45A4 PE=1 SV=2	108	ASDRCTLSWGRRRPFILALCVGVLFGVALFL
0.1	Q9NP59	sp|Q9NP59|S40A1_HUMAN Solute carrier family 40 member 1 OS=Homo sapiens OX=9606 GN=SLC40A1 PE=1 SV=1	364	RRKCGLVRTGLISGLAQLSCLILCVISVFMP
0.1	A0AV02	sp|A0AV02|S12A8_HUMAN Solute carrier family 12 member 8 OS=Homo sapiens OX=9606 GN=SLC12A8 PE=1 SV=4	331	APRILQCIAQEKVIPALACLGQGKGPNKTPV
0.1	Q7L0X0	sp|Q7L0X0|TRIL_HUMAN TLR4 interactor with leucine rich repeats OS=Homo sapiens OX=9606 GN=TRIL PE=1 SV=2	667	GRVCPVAPRDHCAGLVTLPEAGSRGGVDYQL
0.1	O15321	sp|O15321|TM9S1_HUMAN Transmembrane 9 superfamily member 1 OS=Homo sapiens OX=9606 GN=TM9SF1 PE=2 SV=2	335	VHRHGAINSAAILLYALTCCISGYVSSHFYR
0.1	Q6ICI0	sp|Q6ICI0|TM211_HUMAN Transmembrane protein 211 OS=Homo sapiens OX=9606 GN=TMEM211 PE=2 SV=2	33	SFGILTYCSWPQGNSWNQSCVTFSSLEDIPD
0.1	Q9ULS5	sp|Q9ULS5|TMCC3_HUMAN Transmembrane and coiled-coil domain protein 3 OS=Homo sapiens OX=9606 GN=TMCC3 PE=1 SV=3	441	KSRCHILGTFFAVTLLAIFCKNWDHILCAIE
0.1	Q9Y228	sp|Q9Y228|T3JAM_HUMAN TRAF3-interacting JNK-activating modulator OS=Homo sapiens OX=9606 GN=TRAF3IP3 PE=1 SV=2	497	EYLSCLRKLQHCREELNQSQQLPPRRQCGRW
0.1	Q9BT88	sp|Q9BT88|SYT11_HUMAN Synaptotagmin-11 OS=Homo sapiens OX=9606 GN=SYT11 PE=1 SV=2	36	VWSCCHQQAEKKQKNPPYKFIHMLKGISIYP
0.1	Q6UWL2	sp|Q6UWL2|SUSD1_HUMAN Sushi domain-containing protein 1 OS=Homo sapiens OX=9606 GN=SUSD1 PE=1 SV=1	692	CIILRITSEWNKVRRHSCAVWAQVKDSSLML
0.1	Q9BZW2	sp|Q9BZW2|S13A1_HUMAN Solute carrier family 13 member 1 OS=Homo sapiens OX=9606 GN=SLC13A1 PE=1 SV=1	259	TSTNLIFAEYFNTRYPDCRCLNFGSWFTFSF
0.1	Q5BJH7	sp|Q5BJH7|YIF1B_HUMAN Protein YIF1B OS=Homo sapiens OX=9606 GN=YIF1B PE=1 SV=1	240	GLLFGKIGYYLVLGWCCVAIFVFMIRTLRLK
0.1	Q8NG11	sp|Q8NG11|TSN14_HUMAN Tetraspanin-14 OS=Homo sapiens OX=9606 GN=TSPAN14 PE=1 SV=1	82	GALRENICLLNFFCGTIVLIFFLELAVAVLA
0.1	Q96NA8	sp|Q96NA8|TSNA1_HUMAN t-SNARE domain-containing protein 1 OS=Homo sapiens OX=9606 GN=TSNARE1 PE=1 SV=2	472	RQLLAGASRHQLQRHKIKCCFLSAGVTALLV
0.1	Q6ZUK4	sp|Q6ZUK4|TMM26_HUMAN Transmembrane protein 26 OS=Homo sapiens OX=9606 GN=TMEM26 PE=1 SV=1	229	QNVVCPVSVTERGFPSLFFCQYSADLWNIGI
0.1	Q969K7	sp|Q969K7|TMM54_HUMAN Transmembrane protein 54 OS=Homo sapiens OX=9606 GN=TMEM54 PE=1 SV=1	89	PLRWTVFSSSVACALLSLTCALGLLASIAMT
0.1	A6NKF7	sp|A6NKF7|TM88B_HUMAN Transmembrane protein 88B OS=Homo sapiens OX=9606 GN=TMEM88B PE=3 SV=1	76	VVYLGFLCHSRVHPAPGPRCRALFSDRGSAA
0.1	A0A1B0GVZ9	sp|A0A1B0GVZ9|TM269_HUMAN Transmembrane protein 269 OS=Homo sapiens OX=9606 GN=TMEM269 PE=3 SV=1	128	SFHLCFYSPGVPSTYKGLPCPYASCILASTS
0.1	Q7Z7N9	sp|Q7Z7N9|T179B_HUMAN Transmembrane protein 179B OS=Homo sapiens OX=9606 GN=TMEM179B PE=1 SV=1	70	SGLLALYCLLLLLFWIYSSCIEDSHRGAIGL
0.1	Q4ZJI4	sp|Q4ZJI4|SL9B1_HUMAN Sodium/hydrogen exchanger 9B1 OS=Homo sapiens OX=9606 GN=SLC9B1 PE=2 SV=2	173	DPQALRHLKVVCFRLAVGPCLMEASAAAVFS
0.1	O95562	sp|O95562|SFT2B_HUMAN Vesicle transport protein SFT2B OS=Homo sapiens OX=9606 GN=SFT2D2 PE=1 SV=1	34	IKGFIACFAIGILCSLLGTVLLWVPRKGLHL
0.1	O43556	sp|O43556|SGCE_HUMAN Epsilon-sarcoglycan OS=Homo sapiens OX=9606 GN=SGCE PE=1 SV=6	338	IMCCRREGVEKRNMQTPDIQLVHHSAIQKST
0.1	Q8IWB4	sp|Q8IWB4|S31A7_HUMAN Spermatogenesis-associated protein 31A7 OS=Homo sapiens OX=9606 GN=SPATA31A7 PE=1 SV=4	45	YLSYFRCDDPPSPSPGKRKCPVGRRRRPRGR
0.1	O15245	sp|O15245|S22A1_HUMAN Solute carrier family 22 member 1 OS=Homo sapiens OX=9606 GN=SLC22A1 PE=1 SV=2	43	GFTPDHHCQSPGVAELSQRCGWSPAEELNYT
0.1	Q96BI1	sp|Q96BI1|S22AI_HUMAN Solute carrier family 22 member 18 OS=Homo sapiens OX=9606 GN=SLC22A18 PE=1 SV=3	182	CPAILAALATLLGAVLSFTCIPASTKGAKTD
0.1	Q9H6D3	sp|Q9H6D3|XKR8_HUMAN XK-related protein 8 OS=Homo sapiens OX=9606 GN=XKR8 PE=1 SV=1	307	SSWLPSGIPLQLWLPVGCGCFFLGLALRLVY
0.1	Q9H3N1	sp|Q9H3N1|TMX1_HUMAN Thioredoxin-related transmembrane protein 1 OS=Homo sapiens OX=9606 GN=TMX1 PE=1 SV=1	203	ADCLCPSKRRRPQPYPYPSKKLLSESAQPLK
0.1	Q8IV31	sp|Q8IV31|TM139_HUMAN Transmembrane protein 139 OS=Homo sapiens OX=9606 GN=TMEM139 PE=1 SV=1	5	HLLGRLEKPLLLLCCASFLLGLALLGIKTDI
0.1	Q96GX1	sp|Q96GX1|TECT2_HUMAN Tectonic-2 OS=Homo sapiens OX=9606 GN=TCTN2 PE=2 SV=1	639	EYDCNRNEVCWPQLLYPWTQYYQGELHSQCV
0.1	Q7L1I2	sp|Q7L1I2|SV2B_HUMAN Synaptic vesicle glycoprotein 2B OS=Homo sapiens OX=9606 GN=SV2B PE=1 SV=1	268	GTNYHFHSWRVFVIVCALPCTVSMVALKFMP
0.1	O75908	sp|O75908|SOAT2_HUMAN Sterol O-acyltransferase 2 OS=Homo sapiens OX=9606 GN=SOAT2 PE=1 SV=1	311	ACFILGRLCVPVFANMSREPFSTRALVLSIL
0.1	Q9Y2E8	sp|Q9Y2E8|SL9A8_HUMAN Sodium/hydrogen exchanger 8 OS=Homo sapiens OX=9606 GN=SLC9A8 PE=1 SV=4	342	VTQILMQQTLRTVAFLCETCVFAFLGLSIFS
0.1	Q6P4A7	sp|Q6P4A7|SFXN4_HUMAN Sideroflexin-4 OS=Homo sapiens OX=9606 GN=SFXN4 PE=1 SV=1	140	FLCAYMAAFNSINGNRSYTCKPLERSLLMAG
0.1	Q5VVP1	sp|Q5VVP1|S31A6_HUMAN Spermatogenesis-associated protein 31A6 OS=Homo sapiens OX=9606 GN=SPATA31A6 PE=3 SV=1	45	YLSYFHCDDPPSPSPGKRKCPVGRRRRPRGR
0.1	P46059	sp|P46059|S15A1_HUMAN Solute carrier family 15 member 1 OS=Homo sapiens OX=9606 GN=SLC15A1 PE=1 SV=1	182	PMLRVQQCGIHSKQACYPLAFGVPAALMAVA
0.1	P17861	sp|P17861|XBP1_HUMAN X-box-binding protein 1 OS=Homo sapiens OX=9606 GN=XBP1 PE=1 SV=2	203	SCWAFWTTWTQSCSSNALPQSLPAWRSSQRS
0.1	O60635	sp|O60635|TSN1_HUMAN Tetraspanin-1 OS=Homo sapiens OX=9606 GN=TSPAN1 PE=1 SV=2	73	LGCYGAKTESKCALVTFFFILLLIFIAEVAA
0.1	O15482	sp|O15482|TEX28_HUMAN Testis-specific protein TEX28 OS=Homo sapiens OX=9606 GN=TEX28 PE=1 SV=1	358	SSRLCTCTMLMLIGLGVLAWQRWRAIPATDW
0.1	Q96HV5	sp|Q96HV5|TM41A_HUMAN Transmembrane protein 41A OS=Homo sapiens OX=9606 GN=TMEM41A PE=1 SV=1	90	FLNVLAGALFGPWLGLLLCCVLTSVGATCCY
0.1	Q9GZU3	sp|Q9GZU3|TM39B_HUMAN Transmembrane protein 39B OS=Homo sapiens OX=9606 GN=TMEM39B PE=1 SV=1	176	CRSLIHLFRTYSFLNLLFLCYPFGMYIPFLQ
0.1	Q0P670	sp|Q0P670|SPEM2_HUMAN Uncharacterized protein SPEM2 OS=Homo sapiens OX=9606 GN=SPEM2 PE=2 SV=2	1	MENQLWHNTVRCCNQYQESPHDAEDILLLLL
0.1	Q99835	sp|Q99835|SMO_HUMAN Smoothened homolog OS=Homo sapiens OX=9606 GN=SMO PE=1 SV=1	204	KSWYEDVEGCGIQCQNPLFTEAEHQDMHSYI
0.1	Q9NTJ5	sp|Q9NTJ5|SAC1_HUMAN Phosphatidylinositol-3-phosphatase SAC1 OS=Homo sapiens OX=9606 GN=SACM1L PE=1 SV=2	519	WKFLALPIIMVVAFSMCIICLLMAGDTWTET
0.1	Q8N0U8	sp|Q8N0U8|VKORL_HUMAN Vitamin K epoxide reductase complex subunit 1-like protein 1 OS=Homo sapiens OX=9606 GN=VKORC1L1 PE=1 SV=2	39	EKERDPEHRALCDLGPWVKCSAALASRWGRG
0.1	Q6UXZ4	sp|Q6UXZ4|UNC5D_HUMAN Netrin receptor UNC5D OS=Homo sapiens OX=9606 GN=UNC5D PE=1 SV=1	350	ESENCTDGLCILDKKPLHEIKPQSIENASDI
0.1	P41732	sp|P41732|TSN7_HUMAN Tetraspanin-7 OS=Homo sapiens OX=9606 GN=TSPAN7 PE=1 SV=2	75	FGCFATCRGSPWMLKLYAMFLSLVFLAELVA
0.1	Q9Y584	sp|Q9Y584|TIM22_HUMAN Mitochondrial import inner membrane translocase subunit Tim22 OS=Homo sapiens OX=9606 GN=TIMM22 PE=1 SV=2	141	CLIESYRGTSDWKNSVISGCITGGAIGFRAG
0.1	Q2M3C6	sp|Q2M3C6|TM266_HUMAN Transmembrane protein 266 OS=Homo sapiens OX=9606 GN=TMEM266 PE=1 SV=2	73	QREGSNWLKPCCGKRAAVWQVFLLSASLNSF
0.1	A6NGA9	sp|A6NGA9|TM202_HUMAN Transmembrane protein 202 OS=Homo sapiens OX=9606 GN=TMEM202 PE=4 SV=1	85	IKNGLELYAGLWTLCNHELCWSHTPKPPYYL
0.1	Q5BJD5	sp|Q5BJD5|TM41B_HUMAN Transmembrane protein 41B OS=Homo sapiens OX=9606 GN=TMEM41B PE=1 SV=1	136	SILSGFLYPFPLALFLVCLCSGLGASFCYML
0.1	Q6UWJ1	sp|Q6UWJ1|TMCO3_HUMAN Transmembrane and coiled-coil domain-containing protein 3 OS=Homo sapiens OX=9606 GN=TMCO3 PE=1 SV=1	287	LCTAIGLPTMFGYIICGVLLGPSGLNSIKSI
0.1	Q6AI14	sp|Q6AI14|SL9A4_HUMAN Sodium/hydrogen exchanger 4 OS=Homo sapiens OX=9606 GN=SLC9A4 PE=2 SV=2	374	TVGKNHEWNWAFICFTLAFCQIWRAISVFAL
0.1	Q9P0V8	sp|Q9P0V8|SLAF8_HUMAN SLAM family member 8 OS=Homo sapiens OX=9606 GN=SLAMF8 PE=1 SV=1	254	WHWCPCSGKKKKDVHADRVGPETENPLVQDL
0.1	Q8N4L4	sp|Q8N4L4|SPEM1_HUMAN Spermatid maturation protein 1 OS=Homo sapiens OX=9606 GN=SPEM1 PE=2 SV=1	3	MVERPRPEWASYHNCNSNSCQDLGNSVLLLL
0.1	O43759	sp|O43759|SNG1_HUMAN Synaptogyrin-1 OS=Homo sapiens OX=9606 GN=SYNGR1 PE=1 SV=2	49	LNSASEGEEFCIYNRNPNACSYGVAVGVLAF
0.1	Q495N2	sp|Q495N2|S36A3_HUMAN Proton-coupled amino acid transporter 3 OS=Homo sapiens OX=9606 GN=SLC36A3 PE=2 SV=2	77	VSLLAIGVLTVHCMVILLNCAQHLSQRLQKT
0.1	Q8WUX1	sp|Q8WUX1|S38A5_HUMAN Sodium-coupled neutral amino acid transporter 5 OS=Homo sapiens OX=9606 GN=SLC38A5 PE=1 SV=1	266	AFAFVCHPEVLPIYTELCRPSKRRMQAVANV
0.1	Q63ZE4	sp|Q63ZE4|S22AA_HUMAN Solute carrier family 22 member 10 OS=Homo sapiens OX=9606 GN=SLC22A10 PE=2 SV=2	170	FGRRFILRWCLLQLAITDTCAAFAPTFPVYC
0.1	Q6ZT89	sp|Q6ZT89|S2548_HUMAN Solute carrier family 25 member 48 OS=Homo sapiens OX=9606 GN=SLC25A48 PE=1 SV=2	209	EACTGPSPCAVWLAGGMAGAISWGTATPMDV
0.1	A4IF30	sp|A4IF30|S35F4_HUMAN Solute carrier family 35 member F4 OS=Homo sapiens OX=9606 GN=SLC35F4 PE=2 SV=2	138	QTHSENSSQENRIKARCLSCTSMVLKGIWGL
0.1	Q8TAD4	sp|Q8TAD4|ZNT5_HUMAN Zinc transporter 5 OS=Homo sapiens OX=9606 GN=SLC30A5 PE=1 SV=1	97	KHAVAGCIISLLWFFGLTLCGPLRTLLLFEH
0.1	Q9UL62	sp|Q9UL62|TRPC5_HUMAN Short transient receptor potential channel 5 OS=Homo sapiens OX=9606 GN=TRPC5 PE=1 SV=1	539	YFYYETRAIDEPNNCKGIRCEKQNNAFSTLF
0.1	P0C7T8	sp|P0C7T8|TM253_HUMAN Transmembrane protein 253 OS=Homo sapiens OX=9606 GN=TMEM253 PE=4 SV=1	53	VACLNSDCHMATALPLGPGASGLLTGTVTLE
0.1	Q9H6F2	sp|Q9H6F2|TM38A_HUMAN Trimeric intracellular cation channel type A OS=Homo sapiens OX=9606 GN=TMEM38A PE=1 SV=1	43	AVELSRRHPIASWLCAMLHCFGSYILADLLL
0.1	Q86UD5	sp|Q86UD5|SL9B2_HUMAN Sodium/hydrogen exchanger 9B2 OS=Homo sapiens OX=9606 GN=SLC9B2 PE=1 SV=2	107	SECLPGGNLFGIIILFYCAIIGGKLLGLIKL
0.1	Q9UBN6	sp|Q9UBN6|TR10D_HUMAN Tumor necrosis factor receptor superfamily member 10D OS=Homo sapiens OX=9606 GN=TNFRSF10D PE=1 SV=1	232	CRKKFISYLKGICSGGGGGPERVHRVLFRRR
0.1	Q9NYV7	sp|Q9NYV7|T2R16_HUMAN Taste receptor type 2 member 16 OS=Homo sapiens OX=9606 GN=TAS2R16 PE=1 SV=1	62	ASMLNNFCSYFNLNYVLCNLTITWEFFNILT
0.1	Q03519	sp|Q03519|TAP2_HUMAN Antigen peptide transporter 2 OS=Homo sapiens OX=9606 GN=TAP2 PE=1 SV=1	208	GCRGGCFTYTMSRINLRIREQLFSSLLRQDL
0.1	Q16563	sp|Q16563|SYPL1_HUMAN Synaptophysin-like protein 1 OS=Homo sapiens OX=9606 GN=SYPL1 PE=1 SV=1	181	ATGHNIIDELPPCKKKAVLCYFGSVTSMGSL
0.1	Q6UWF3	sp|Q6UWF3|SCIMP_HUMAN SLP adapter and CSK-interacting membrane protein OS=Homo sapiens OX=9606 GN=SCIMP PE=1 SV=1	39	YCVCKWQLRRGKKWEIAKPLKHKQVDEEKMY
0.1	Q16348	sp|Q16348|S15A2_HUMAN Solute carrier family 15 member 2 OS=Homo sapiens OX=9606 GN=SLC15A2 PE=1 SV=2	36	TICGSNYPLSIAFIVVNEFCERFSYYGMKAV
0.1	A6NCQ9	sp|A6NCQ9|RN222_HUMAN RING finger protein 222 OS=Homo sapiens OX=9606 GN=RNF222 PE=4 SV=1	170	SLAELSEASLAPRSARAFCCRSRALLLITLI
0.1	Q6PJF5	sp|Q6PJF5|RHDF2_HUMAN Inactive rhomboid protein 2 OS=Homo sapiens OX=9606 GN=RHBDF2 PE=1 SV=2	631	SQVHCLDKVCGLLPFLNPEVPDQFYRLWLSL
0.1	O14863	sp|O14863|ZNT4_HUMAN Zinc transporter 4 OS=Homo sapiens OX=9606 GN=SLC30A4 PE=1 SV=2	84	TNSQLSLKVDSCDNCSKQREILKQRKVKARL
0.1	Q5T4F4	sp|Q5T4F4|ZFY27_HUMAN Protrudin OS=Homo sapiens OX=9606 GN=ZFYVE27 PE=1 SV=1	59	DGVRYLLRWQMPLCSLLTCLGLNVLFLTLNE
0.1	P48995	sp|P48995|TRPC1_HUMAN Short transient receptor potential channel 1 OS=Homo sapiens OX=9606 GN=TRPC1 PE=1 SV=1	560	DKGYTSKEQKDCVGIFCEQQSNDTFHSFIGT
0.1	Q7Z5M5	sp|Q7Z5M5|TMC3_HUMAN Transmembrane channel-like protein 3 OS=Homo sapiens OX=9606 GN=TMC3 PE=2 SV=3	254	RTSLASASNENYTFCWRVFCAWDYLIGNPEA
0.1	Q96DC7	sp|Q96DC7|TMCO6_HUMAN Transmembrane and coiled-coil domain-containing protein 6 OS=Homo sapiens OX=9606 GN=TMCO6 PE=1 SV=2	308	ACPVLRCLSNLLTEAAVETVGGQMQLRDERV
0.1	Q96DZ7	sp|Q96DZ7|T4S19_HUMAN Transmembrane 4 L6 family member 19 OS=Homo sapiens OX=9606 GN=TM4SF19 PE=1 SV=2	80	WRYGCFSKSGLCRSVLTALLSGGLALLGALI
0.1	Q6UX68	sp|Q6UX68|XKR5_HUMAN XK-related protein 5 OS=Homo sapiens OX=9606 GN=XKR5 PE=2 SV=2	232	DSTCHWRLFNLLVGAVYILCYLSFWDSPSRN
0.1	A2RUG3	sp|A2RUG3|XKRY2_HUMAN Testis-specific XK-related protein	Y-linked 2 OS=Homo sapiens OX=9606 GN=XKRY2 PE=2 SV=2	15
0.1	Q8IV45	sp|Q8IV45|UN5CL_HUMAN UNC5C-like protein OS=Homo sapiens OX=9606 GN=UNC5CL PE=1 SV=2	31	LRWHCPRRLLGACWTLNGQEEPVSQPTPQLE
0.1	P51172	sp|P51172|SCNND_HUMAN Amiloride-sensitive sodium channel subunit delta OS=Homo sapiens OX=9606 GN=SCNN1D PE=1 SV=3	222	ELLTFFCTNATIHGAIRLVCSRGNRLKTTSW
0.1	Q9BZD2	sp|Q9BZD2|S29A3_HUMAN Equilibrative nucleoside transporter 3 OS=Homo sapiens OX=9606 GN=SLC29A3 PE=1 SV=3	308	LGFCVTYVFFITSLIYPAICTNIESLNKGSG
0.1	P55017	sp|P55017|S12A3_HUMAN Solute carrier family 12 member 3 OS=Homo sapiens OX=9606 GN=SLC12A3 PE=1 SV=3	402	SGVLNDTVTPGWGACEGLACSYGWNFTECTQ
0.1	P51685	sp|P51685|CCR8_HUMAN C-C chemokine receptor type 8 OS=Homo sapiens OX=9606 GN=CCR8 PE=1 SV=1	209	IPFTIFMFCYIKILHQLKRCQNHNKTKAIRL
0.1	Q16739	sp|Q16739|CEGT_HUMAN Ceramide glucosyltransferase OS=Homo sapiens OX=9606 GN=UGCG PE=1 SV=1	304	GWAAHHVFRWDIMVFFMCHCLAWFIFDYIQL
0.1	H7C241	sp|H7C241|CLD34_HUMAN Claudin-34 OS=Homo sapiens OX=9606 GN=CLDN34 PE=3 SV=2	39	MKDTSLYPPGIACVGIFRVCIYRRRTNSTTT
0.1	Q96B33	sp|Q96B33|CLD23_HUMAN Claudin-23 OS=Homo sapiens OX=9606 GN=CLDN23 PE=1 SV=2	52	MCREQSSRERECGQTDQWGYFEAQPVLVARA
0.1	Q6PJW8	sp|Q6PJW8|CNST_HUMAN Consortin OS=Homo sapiens OX=9606 GN=CNST PE=1 SV=3	685	LYCTFGDMESPVCTDFADNMDFYYTKLLQGV
0.1	Q6UWH4	sp|Q6UWH4|GAK1B_HUMAN Golgi-associated kinase 1B OS=Homo sapiens OX=9606 GN=GASK1B PE=2 SV=1	8	GQLINWFICSLCVPRVRKLWSSRRPRTRRNL
0.1	A8MWY0	sp|A8MWY0|ELAP2_HUMAN Endosome/lysosome-associated apoptosis and autophagy regulator family member 2 OS=Homo sapiens OX=9606 GN=ELAPOR2 PE=1 SV=2	902	NEPKWCIKGISLPEKKLATCETVDFWLKVGA
0.1	P50993	sp|P50993|AT1A2_HUMAN Sodium/potassium-transporting ATPase subunit alpha-2 OS=Homo sapiens OX=9606 GN=ATP1A2 PE=1 SV=1	336	ATVTVCLTLTAKRMARKNCLVKNLEAVETLG
0.1	Q16570	sp|Q16570|ACKR1_HUMAN Atypical chemokine receptor 1 OS=Homo sapiens OX=9606 GN=ACKR1 PE=1 SV=3	35	SFPDGDYGANLEAAAPCHSCNLLDDSALPFF
0.1	P0DMS8	sp|P0DMS8|AA3R_HUMAN Adenosine receptor A3 OS=Homo sapiens OX=9606 GN=ADORA3 PE=1 SV=1	19	EIFIGLCAIVGNVLVICVVKLNPSLQTTTFY
0.1	Q96PS6	sp|Q96PS6|GAFA1_HUMAN Putative uncharacterized protein GAFA-1 OS=Homo sapiens OX=9606 GN=GAFA1 PE=4 SV=1	33	SLRLECSSAIIKPTAASNSCVQVNLPPSMCD
0.1	Q14517	sp|Q14517|FAT1_HUMAN Protocadherin Fat 1 OS=Homo sapiens OX=9606 GN=FAT1 PE=1 SV=2	4152	NCSHEYRGRHCEDAAPNQYVSTPWNIGLAEG
0.1	P61565	sp|P61565|ENK21_HUMAN Endogenous retrovirus group K member 21 Env polyprotein OS=Homo sapiens OX=9606 GN=ERVK-21 PE=1 SV=1	652	LVCRCTQQLRRDSDHRERAMMTMVVLSKRKG
0.1	Q9UKH3	sp|Q9UKH3|ENK9_HUMAN Endogenous retrovirus group K member 9 Env polyprotein OS=Homo sapiens OX=9606 GN=ERVK-9 PE=1 SV=1	652	LVCRCTQQLRRDSDHRERAMMTMAVLSKRKG
0.1	Q9UBM7	sp|Q9UBM7|DHCR7_HUMAN 7-dehydrocholesterol reductase OS=Homo sapiens OX=9606 GN=DHCR7 PE=1 SV=1	60	ACDQYSCALTGPVVDIVTGHARLSDIWAKTP
0.1	Q16281	sp|Q16281|CNGA3_HUMAN Cyclic nucleotide-gated cation channel alpha-3 OS=Homo sapiens OX=9606 GN=CNGA3 PE=1 SV=2	187	ICRACFDELQSEYLMLWLVLDYSADVLYVLD
0.1	Q9ULY5	sp|Q9ULY5|CLC4E_HUMAN C-type lectin domain family 4 member E OS=Homo sapiens OX=9606 GN=CLEC4E PE=1 SV=1	1	MNSSKSSETQCTERGCFSSQMFLWTVAGIPI
0.1	P98196	sp|P98196|AT11A_HUMAN Probable phospholipid-transporting ATPase IH OS=Homo sapiens OX=9606 GN=ATP11A PE=1 SV=3	885	YFFYKNVCFIFPQFLYQFFCGFSQQTLYDTA
0.1	Q14802	sp|Q14802|FXYD3_HUMAN FXYD domain-containing ion transport regulator 3 OS=Homo sapiens OX=9606 GN=FXYD3 PE=1 SV=1	59	AKCKCKFGQKSGHHPGETPPLITPGSAQS
0.1	Q9H1X3	sp|Q9H1X3|DJC25_HUMAN DnaJ homolog subfamily C member 25 OS=Homo sapiens OX=9606 GN=DNAJC25 PE=1 SV=1	40	VEGLYCGTRDCYEVLGVSRSAGKAEIARAYR
0.1	Q9ULW2	sp|Q9ULW2|FZD10_HUMAN Frizzled-10 OS=Homo sapiens OX=9606 GN=FZD10 PE=1 SV=1	196	GKFHHVEKSASCAPLCTPGVDVYWSREDKRF
0.1	Q9UKR5	sp|Q9UKR5|ERG28_HUMAN Ergosterol biosynthetic protein 28 homolog OS=Homo sapiens OX=9606 GN=ERG28 PE=1 SV=1	49	QARTFGIWTLLSSVIRCLCAIDIHNKTLYHI
0.1	Q5T3F8	sp|Q5T3F8|CSCL2_HUMAN CSC1-like protein 2 OS=Homo sapiens OX=9606 GN=TMEM63B PE=1 SV=1	707	APTSMFTFVVLVITIVICLCHVCFGHFKYLS
0.1	P23634	sp|P23634|AT2B4_HUMAN Plasma membrane calcium-transporting ATPase 4 OS=Homo sapiens OX=9606 GN=ATP2B4 PE=1 SV=2	1015	GGKPFSCTSLSLSQWLWCLFIGIGELLWGQF
0.1	A5D6W6	sp|A5D6W6|FITM1_HUMAN Fat storage-inducing transmembrane protein 1 OS=Homo sapiens OX=9606 GN=FITM1 PE=2 SV=1	191	TFCCLLMAEEAAVFAKYLAHGLPAGAPLRLV
0.1	Q69384	sp|Q69384|ENK6_HUMAN Endogenous retrovirus group K member 6 Env polyprotein OS=Homo sapiens OX=9606 GN=ERVK-6 PE=1 SV=1	653	LVCRCTQQLRRDSDHRERAMMTMAVLSKRKG
0.1	Q9HCJ1	sp|Q9HCJ1|ANKH_HUMAN Progressive ankylosis protein homolog OS=Homo sapiens OX=9606 GN=ANKH PE=1 SV=2	186	CREPLLIPILSLYMGALVRCTTLCLGYYKNI
0.1	Q9BZJ8	sp|Q9BZJ8|GPR61_HUMAN G-protein coupled receptor 61 OS=Homo sapiens OX=9606 GN=GPR61 PE=1 SV=2	105	FDHALFGEVACRLYLFLSVCFVSLAILSVSA
0.1	Q92847	sp|Q92847|GHSR_HUMAN Growth hormone secretagogue receptor type 1 OS=Homo sapiens OX=9606 GN=GHSR PE=1 SV=1	107	RPWNFGDLLCKLFQFVSESCTYATVLTITAL
0.1	O43826	sp|O43826|G6PT1_HUMAN Glucose-6-phosphate exchanger SLC37A4 OS=Homo sapiens OX=9606 GN=SLC37A4 PE=1 SV=1	164	SWRSTLALSGALCVVVSFLCLLLIHNEPADV
0.1	A0FGR8	sp|A0FGR8|ESYT2_HUMAN Extended synaptotagmin-2 OS=Homo sapiens OX=9606 GN=ESYT2 PE=1 SV=1	148	WCRRSRGLKALRLCRALALLEDEERVVRLGV
0.1	Q5VUB5	sp|Q5VUB5|F1711_HUMAN Protein FAM171A1 OS=Homo sapiens OX=9606 GN=FAM171A1 PE=1 SV=1	324	LLYYCRRKCLKPRQHHRKLQLPAGLESSKRD
0.1	A8MVW0	sp|A8MVW0|F1712_HUMAN Protein FAM171A2 OS=Homo sapiens OX=9606 GN=FAM171A2 PE=1 SV=1	336	LIYYCRRRCLKPRQQHRKLQLSGPSDGNKRD
0.1	A0A1B0GTK4	sp|A0A1B0GTK4|F237A_HUMAN Protein FAM237A OS=Homo sapiens OX=9606 GN=FAM237A PE=3 SV=1	30	PFFCHSQTDLLALSQADPQCWESSSVLLLEM
0.1	Q15303	sp|Q15303|ERBB4_HUMAN Receptor tyrosine-protein kinase erbB-4 OS=Homo sapiens OX=9606 GN=ERBB4 PE=1 SV=1	622	TQGCNGPTSHDCIYYPWTGHSTLPQHARTPL
0.1	O00144	sp|O00144|FZD9_HUMAN Frizzled-9 OS=Homo sapiens OX=9606 GN=FZD9 PE=2 SV=1	200	EKFQYVEKSRSCAPRCGPGVEVFWSRRDKDF
0.1	A6NC97	sp|A6NC97|F172B_HUMAN Putative protein FAM172B OS=Homo sapiens OX=9606 GN=FAM172BP PE=5 SV=3	199	KCIPKRCSNTPEEHTAYIWDYFISKTEGKDI
0.1	Q5T7R7	sp|Q5T7R7|CA185_HUMAN Uncharacterized protein C1orf185 OS=Homo sapiens OX=9606 GN=C1orf185 PE=2 SV=1	37	ICKRREIFQNSKFKAIDERCRQRPSMAKIKS
0.1	C9JDP6	sp|C9JDP6|CLD25_HUMAN Putative claudin-25 OS=Homo sapiens OX=9606 GN=CLDN25 PE=5 SV=1	52	EVCVDREEVATVCKAFESFLSLPQELQVARI
0.1	Q8NFU0	sp|Q8NFU0|BEST4_HUMAN Bestrophin-4 OS=Homo sapiens OX=9606 GN=BEST4 PE=2 SV=1	202	RDDIALCLLLEELNKYRAKCSMLFHYDWISI
0.1	Q93084	sp|Q93084|AT2A3_HUMAN Sarcoplasmic/endoplasmic reticulum calcium ATPase 3 OS=Homo sapiens OX=9606 GN=ATP2A3 PE=1 SV=2	869	QLRNFLKCSEDNPLFAGIDCEVFESRFPTTM
0.1	Q8IZF4	sp|Q8IZF4|AGRG5_HUMAN Adhesion G-protein coupled receptor G5 OS=Homo sapiens OX=9606 GN=ADGRG5 PE=2 SV=3	221	CRCNHLTYFAVLMQLSPALVPAELLAPLTYI
0.1	Q96P88	sp|Q96P88|GNRR2_HUMAN Putative gonadotropin-releasing hormone II receptor OS=Homo sapiens OX=9606 GN=GNRHR2 PE=5 SV=4	88	HTVHCAGPVPFTQCVTKGSFKAQWQETTYNL
0.1	Q7Z3F1	sp|Q7Z3F1|GP155_HUMAN Integral membrane protein GPR155 OS=Homo sapiens OX=9606 GN=GPR155 PE=2 SV=2	631	SRCNSQSCILAQEEEQYLQSGDQQLTRHVLL
0.1	Q8TDU6	sp|Q8TDU6|GPBAR_HUMAN G-protein coupled bile acid receptor 1 OS=Homo sapiens OX=9606 GN=GPBAR1 PE=2 SV=1	188	VLATAHRQLQDICRLERAVCRDEPSALARAL
0.1	Q99527	sp|Q99527|GPER1_HUMAN G-protein coupled estrogen receptor 1 OS=Homo sapiens OX=9606 GN=GPER1 PE=1 SV=1	159	LARAMRCSLFRTKHHARLSCGLIWMASVSAT
0.1	Q9NYM4	sp|Q9NYM4|GPR83_HUMAN Probable G-protein coupled receptor 83 OS=Homo sapiens OX=9606 GN=GPR83 PE=2 SV=2	134	NSTWIFGKGMCHVSRFAQYCSLHVSALTLTA
0.1	P36269	sp|P36269|GGT5_HUMAN Glutathione hydrolase 5 proenzyme OS=Homo sapiens OX=9606 GN=GGT5 PE=1 SV=2	34	APCGPQAFAHAAVAADSKVCSDIGRAILQQQ
0.1	Q8WWI5	sp|Q8WWI5|CTL1_HUMAN Choline transporter-like protein 1 OS=Homo sapiens OX=9606 GN=SLC44A1 PE=1 SV=1	1	MGCCSSASSAAQSSKREWKPLEDRSCTDIPW
0.1	Q9UKB5	sp|Q9UKB5|AJAP1_HUMAN Adherens junction-associated protein 1 OS=Homo sapiens OX=9606 GN=AJAP1 PE=1 SV=1	303	LKNCCAQSGNTRRNSHQRKTNQQEESCQNLT
0.1	Q9GZZ6	sp|Q9GZZ6|ACH10_HUMAN Neuronal acetylcholine receptor subunit alpha-10 OS=Homo sapiens OX=9606 GN=CHRNA10 PE=1 SV=1	208	PARRRVLTYGCCSEPYPDVTFTLLLRRRAAA
0.1	P51841	sp|P51841|GUC2F_HUMAN Retinal guanylyl cyclase 2 OS=Homo sapiens OX=9606 GN=GUCY2F PE=1 SV=2	441	PGGRPPRADAKCWFAEGKICHGGIDPAFAMM
0.1	Q15884	sp|Q15884|F1892_HUMAN Protein FAM189A2 OS=Homo sapiens OX=9606 GN=FAM189A2 PE=1 SV=3	57	QPAKCTDKENALKLFPVQPCSAVHLLLKKVL
0.1	Q9NYP7	sp|Q9NYP7|ELOV5_HUMAN Elongation of very long chain fatty acids protein 5 OS=Homo sapiens OX=9606 GN=ELOVL5 PE=1 SV=1	206	QLLQFVLTIIQTSCGVIWPCTFPLGWLYFQI
0.1	Q8TDV5	sp|Q8TDV5|GP119_HUMAN Glucose-dependent insulinotropic receptor OS=Homo sapiens OX=9606 GN=GPR119 PE=1 SV=1	152	KGQCSFFAVFHPHFVLTLSCVGFFPAMLLFV
0.1	Q9UJ14	sp|Q9UJ14|GGT7_HUMAN Glutathione hydrolase 7 OS=Homo sapiens OX=9606 GN=GGT7 PE=1 SV=2	83	SPLRETRKDPFSAAAAECSCRQDGLTVIVTA
0.1	Q8N6M3	sp|Q8N6M3|FITM2_HUMAN Fat storage-inducing transmembrane protein 2 OS=Homo sapiens OX=9606 GN=FITM2 PE=1 SV=1	121	CYQSPALEGVRKEHQSKQQCHQEGGFWHGFD
0.1	O43169	sp|O43169|CYB5B_HUMAN Cytochrome b5 type B OS=Homo sapiens OX=9606 GN=CYB5B PE=1 SV=3	103	DLKPESGSKDPSKNDTCKSCWAYWILPIIGA
0.1	P51810	sp|P51810|GP143_HUMAN G-protein coupled receptor 143 OS=Homo sapiens OX=9606 GN=GPR143 PE=1 SV=2	1	MASPRLGTFCCPTRDAATQLVLSFQPRAFHA
0.1	A2A2Y4	sp|A2A2Y4|FRMD3_HUMAN FERM domain-containing protein 3 OS=Homo sapiens OX=9606 GN=FRMD3 PE=1 SV=1	558	FLCEIRQTPEFEQFHYEYYCPLKEWVAGKVH
0.1	P06734	sp|P06734|FCER2_HUMAN Low affinity immunoglobulin epsilon Fc receptor OS=Homo sapiens OX=9606 GN=FCER2 PE=1 SV=1	1	MEEGQYSEIEELPRRRCCRRGTQIVLLGLVT
0.1	O14842	sp|O14842|FFAR1_HUMAN Free fatty acid receptor 1 OS=Homo sapiens OX=9606 GN=FFAR1 PE=1 SV=1	108	AAFPLGYQAFRRPCYSWGVCAAIWALVLCHL
0.1	Q9NXB9	sp|Q9NXB9|ELOV2_HUMAN Elongation of very long chain fatty acids protein 2 OS=Homo sapiens OX=9606 GN=ELOVL2 PE=1 SV=2	147	VYHHASMFNIWWCVLNWIPCGQSFFGPTLNS
0.1	O00341	sp|O00341|EAA5_HUMAN Excitatory amino acid transporter 5 OS=Homo sapiens OX=9606 GN=SLC1A7 PE=2 SV=2	237	GRMGDSGAPLVSFCQCLNESVMKIVAVAVWY
0.1	A0A087X1C5	sp|A0A087X1C5|CP2D7_HUMAN Putative cytochrome P450 2D7 OS=Homo sapiens OX=9606 GN=CYP2D7 PE=5 SV=1	326	DVQRGRRVSPGCPIVGTHVCPVRVQQEIDDV
0.1	Q8NB49	sp|Q8NB49|AT11C_HUMAN Phospholipid-transporting ATPase IG OS=Homo sapiens OX=9606 GN=ATP11C PE=1 SV=3	879	YFFYKNLCFILPQFLYQFFCGFSQQPLYDAA
0.1	Q9UPC5	sp|Q9UPC5|GPR34_HUMAN Probable G-protein coupled receptor 34 OS=Homo sapiens OX=9606 GN=GPR34 PE=2 SV=2	157	NRSIQQRKAITTKQSIYVCCIVWMLALGGFL
0.1	P25090	sp|P25090|FPR2_HUMAN N-formyl peptide receptor 2 OS=Homo sapiens OX=9606 GN=FPR2 PE=1 SV=2	121	LDRCICVLHPVWAQNHRTVSLAMKVIVGPWI
0.1	P59646	sp|P59646|FXYD4_HUMAN FXYD domain-containing ion transport regulator 4 OS=Homo sapiens OX=9606 GN=FXYD4 PE=3 SV=2	59	GKCKCKSSQKQHSPVPEKAIPLITPGSATTC
0.1	A6NN92	sp|A6NN92|CXE1_HUMAN Putative gap junction epsilon-1 protein OS=Homo sapiens OX=9606 GN=GJE1 PE=5 SV=1	45	GNEALHFICDPDKREVNLFCYNQFRPITPQV
0.1	O95622	sp|O95622|ADCY5_HUMAN Adenylate cyclase type 5 OS=Homo sapiens OX=9606 GN=ADCY5 PE=1 SV=3	288	CNRAAFHQDHMGLACYALIAVVLAVQVVGLL
0.1	Q9NRM0	sp|Q9NRM0|GTR9_HUMAN Solute carrier family 2	facilitated glucose transporter member 9 OS=Homo sapiens OX=9606 GN=SLC2A9 PE=1 SV=2	325
0.1	Q8NFN8	sp|Q8NFN8|GP156_HUMAN Probable G-protein coupled receptor 156 OS=Homo sapiens OX=9606 GN=GPR156 PE=2 SV=2	57	LSCGLLLILFFLAFTIHCRKNRIVKMSSPNL
0.1	O15529	sp|O15529|GPR42_HUMAN G-protein coupled receptor 42 OS=Homo sapiens OX=9606 GN=GPR42 PE=1 SV=1	251	CGESPVWRIYVTLLSTLNSCVDPFVYYFSSS
0.1	O75084	sp|O75084|FZD7_HUMAN Frizzled-7 OS=Homo sapiens OX=9606 GN=FZD7 PE=1 SV=2	227	ERDCGAPCEPGRANGLMYFKEEERRFARLWV
0.1	Q9BSJ5	sp|Q9BSJ5|CQ080_HUMAN Uncharacterized protein C17orf80 OS=Homo sapiens OX=9606 GN=C17orf80 PE=2 SV=2	573	FRRLKKLCRPLPWKSTVPPCIGVAKTTGDCR
0.1	Q8N7P3	sp|Q8N7P3|CLD22_HUMAN Claudin-22 OS=Homo sapiens OX=9606 GN=CLDN22 PE=1 SV=3	52	QTCVIQEEVGMQCKDFDSFLALPAELRVSRI
0.1	P36896	sp|P36896|ACV1B_HUMAN Activin receptor type-1B OS=Homo sapiens OX=9606 GN=ACVR1B PE=1 SV=1	153	QRVYHNRQRLDMEDPSCEMCLSKDKTLQDLV
0.1	A8MUP6	sp|A8MUP6|GS1L2_HUMAN Germ cell-specific gene 1-like protein 2 OS=Homo sapiens OX=9606 GN=GSG1L2 PE=3 SV=3	29	SHWCEGTRRVVKPLCQDQPGGQHCIHFKRDN
0.1	P47871	sp|P47871|GLR_HUMAN Glucagon receptor OS=Homo sapiens OX=9606 GN=GCGR PE=1 SV=1	285	VKCLFENVQCWTSNDNMGFWWILRFPVFLAI
0.1	Q96P67	sp|Q96P67|GPR82_HUMAN Probable G-protein coupled receptor 82 OS=Homo sapiens OX=9606 GN=GPR82 PE=2 SV=1	277	QRDNCQQLNYLIETKNILTCLASARSSTDPI
0.1	O00591	sp|O00591|GBRP_HUMAN Gamma-aminobutyric acid receptor subunit pi OS=Homo sapiens OX=9606 GN=GABRP PE=2 SV=1	294	TSLPNTNCFIKAIDVYLGICFSFVFGALLEY
0.1	Q8NGA4	sp|Q8NGA4|G32P1_HUMAN Putative G-protein coupled receptor GPR32P1 OS=Homo sapiens OX=9606 GN=GPR32P1 PE=5 SV=2	17	GALTQGHSCSRKMNASRCLSEEVGSLRPLTM
0.1	Q15125	sp|Q15125|EBP_HUMAN 3-beta-hydroxysteroid-Delta(8)	Delta(7)-isomerase OS=Homo sapiens OX=9606 GN=EBP PE=1 SV=3	53
0.1	Q9BZC7	sp|Q9BZC7|ABCA2_HUMAN ATP-binding cassette sub-family A member 2 OS=Homo sapiens OX=9606 GN=ABCA2 PE=1 SV=4	1842	WDMLNYLVPATCCVIILFVFDLPAYTSPTNF
0.1	Q9GZN0	sp|Q9GZN0|GPR88_HUMAN Probable G-protein coupled receptor 88 OS=Homo sapiens OX=9606 GN=GPR88 PE=2 SV=2	62	LQTTSNAFIVNGCAADLSVCALWMPQEAVLG
0.1	P42261	sp|P42261|GRIA1_HUMAN Glutamate receptor 1 OS=Homo sapiens OX=9606 GN=GRIA1 PE=1 SV=2	826	IEFCYKSRSESKRMKGFCLIPQQSINEAIRT
0.1	Q16280	sp|Q16280|CNGA2_HUMAN Cyclic nucleotide-gated olfactory channel OS=Homo sapiens OX=9606 GN=CNGA2 PE=2 SV=2	142	CWLFVIAMPVLYNWCLLVARACFSDLQKGYY
0.1	Q13698	sp|Q13698|CAC1S_HUMAN Voltage-dependent L-type calcium channel subunit alpha-1S OS=Homo sapiens OX=9606 GN=CACNA1S PE=1 SV=4	25	PRPPRALFCLTLENPLRKACISIVEWKPFET
0.1	Q10589	sp|Q10589|BST2_HUMAN Bone marrow stromal antigen 2 OS=Homo sapiens OX=9606 GN=BST2 PE=1 SV=1	1	MASTSYDYCRVPMEDGDKRCKLLLGIGILVL
0.1	O95395	sp|O95395|GCNT3_HUMAN Beta-1	3-galactosyl-O-glycosyl-glycoprotein beta-1	6-N-acetylglucosaminyltransferase 3 OS=Homo sapiens OX=9606 GN=GCNT3 PE=2 SV=1
0.1	Q9H0Q3	sp|Q9H0Q3|FXYD6_HUMAN FXYD domain-containing ion transport regulator 6 OS=Homo sapiens OX=9606 GN=FXYD6 PE=1 SV=1	58	SRRCKCSFNQKPRAPGDEEAQVENLITANAT
0.1	Q9BUM1	sp|Q9BUM1|G6PC3_HUMAN Glucose-6-phosphatase 3 OS=Homo sapiens OX=9606 GN=G6PC3 PE=1 SV=2	96	QVHQFPSSCETGPGSPSGHCMITGAALWPIM
0.1	P31994	sp|P31994|FCG2B_HUMAN Low affinity immunoglobulin gamma Fc region receptor II-b OS=Homo sapiens OX=9606 GN=FCGR2B PE=1 SV=2	242	VALIYCRKKRISALPGYPECREMGETLPEKP
0.1	Q96P56	sp|Q96P56|CTSR2_HUMAN Cation channel sperm-associated protein 2 OS=Homo sapiens OX=9606 GN=CATSPER2 PE=1 SV=2	88	HVRCSQRPPLSLWAGWVLECPLFKNFIIFLV
0.1	Q9HA72	sp|Q9HA72|CAHM2_HUMAN Calcium homeostasis modulator protein 2 OS=Homo sapiens OX=9606 GN=CALHM2 PE=1 SV=1	41	VVAFHCPCSPARNYLYGLAAIGVPALVLFII
0.1	Q15760	sp|Q15760|GPR19_HUMAN Probable G-protein coupled receptor 19 OS=Homo sapiens OX=9606 GN=GPR19 PE=2 SV=2	333	YNANFRRGMKETFCMSSMKCYRSNAYTITTS
0.1	O60478	sp|O60478|G137B_HUMAN Integral membrane protein GPR137B OS=Homo sapiens OX=9606 GN=GPR137B PE=1 SV=1	104	VAANSLSPFVFWLLYCFPVCLQFFTLTLMNL
0.1	Q9NQR9	sp|Q9NQR9|G6PC2_HUMAN Glucose-6-phosphatase 2 OS=Homo sapiens OX=9606 GN=G6PC2 PE=1 SV=1	86	ETQIYPNHSSPCLEQFPTTCETGPGSPSGHA
0.1	Q96PD7	sp|Q96PD7|DGAT2_HUMAN Diacylglycerol O-acyltransferase 2 OS=Homo sapiens OX=9606 GN=DGAT2 PE=1 SV=2	88	SAILMYIFCTDCWLIAVLYFTWLVFDWNTPK
0.1	P30926	sp|P30926|ACHB4_HUMAN Neuronal acetylcholine receptor subunit beta-4 OS=Homo sapiens OX=9606 GN=CHRNB4 PE=1 SV=2	257	PSDCGEKMTLCISVLLALTFFLLLISKIVPP
0.1	Q86VZ5	sp|Q86VZ5|SMS1_HUMAN Phosphatidylcholine:ceramide cholinephosphotransferase 1 OS=Homo sapiens OX=9606 GN=SGMS1 PE=1 SV=3	208	KSIISRRFFCIVGTLYLYRCITMYVTTLPVP
0.1	O15127	sp|O15127|SCAM2_HUMAN Secretory carrier-associated membrane protein 2 OS=Homo sapiens OX=9606 GN=SCAMP2 PE=1 SV=2	124	PSWCPVKPCFYQDFSTEIPADYQRICKMLYY
0.1	Q3SXP7	sp|Q3SXP7|SHSL1_HUMAN Protein shisa-like-1 OS=Homo sapiens OX=9606 GN=SHISAL1 PE=1 SV=2	68	KYCCNETEFQAVMQANLTASSEGYMHNNYTA
0.1	Q8IXU6	sp|Q8IXU6|S35F2_HUMAN Solute carrier family 35 member F2 OS=Homo sapiens OX=9606 GN=SLC35F2 PE=1 SV=1	43	IALGQMLSLCICGTAITSQYLAERYKVNTPM
0.1	Q9UGH3	sp|Q9UGH3|S23A2_HUMAN Solute carrier family 23 member 2 OS=Homo sapiens OX=9606 GN=SLC23A2 PE=1 SV=1	141	IGTIFFCVGITTLLQTTFGCRLPLFQASAFA
0.1	Q86VR2	sp|Q86VR2|RETR3_HUMAN Reticulophagy regulator 3 OS=Homo sapiens OX=9606 GN=RETREG3 PE=1 SV=1	157	NVLLFKKQNPGKFCLLSCGILTFLAVLGRYV
0.1	Q00765	sp|Q00765|REEP5_HUMAN Receptor expression-enhancing protein 5 OS=Homo sapiens OX=9606 GN=REEP5 PE=1 SV=3	110	FPFYYMLKCGFLLWCMAPSPSNGAELLYKRI
0.1	Q32ZL2	sp|Q32ZL2|PLPR5_HUMAN Phospholipid phosphatase-related protein type 5 OS=Homo sapiens OX=9606 GN=PLPPR5 PE=2 SV=2	91	QLATRDFENQEKTILTGDCCYINPLVRRTVR
0.1	Q86WK9	sp|Q86WK9|PAQR7_HUMAN Membrane progestin receptor alpha OS=Homo sapiens OX=9606 GN=PAQR7 PE=1 SV=1	190	CYNKYIQKPGLLGRTCQEVPSVLAYALDISP
0.1	O43760	sp|O43760|SNG2_HUMAN Synaptogyrin-2 OS=Homo sapiens OX=9606 GN=SYNGR2 PE=1 SV=1	49	SNAHESKQMYCVFNRNEDACRYGSAIGVLAF
0.1	O95918	sp|O95918|OR2H2_HUMAN Olfactory receptor 2H2 OS=Homo sapiens OX=9606 GN=OR2H2 PE=2 SV=2	56	PMYFFLSNLSFLDLCFTTSCVPQMLVNLWGP
0.1	Q9BPV8	sp|Q9BPV8|P2Y13_HUMAN P2Y purinoceptor 13 OS=Homo sapiens OX=9606 GN=P2RY13 PE=1 SV=3	321	CKKFTEKLPCMQGRKTTASSQENHSSQTDNI
0.1	Q8NGI2	sp|Q8NGI2|O52N4_HUMAN Olfactory receptor 52N4 OS=Homo sapiens OX=9606 GN=OR52N4 PE=2 SV=2	27	LWISFPFCSMYVVAMVGNCGLLYLIHYEDAL
0.1	Q9H342	sp|Q9H342|O51J1_HUMAN Olfactory receptor 51J1 OS=Homo sapiens OX=9606 GN=OR51J1 PE=3 SV=2	172	LWPQCPLTFLLSAPQSYLSCGNISVNNIYGI
0.1	O14581	sp|O14581|OR7AH_HUMAN Olfactory receptor 7A17 OS=Homo sapiens OX=9606 GN=OR7A17 PE=1 SV=1	83	INIQTQSRVITYAGCITQMCFFVLFGGLDSL
0.1	Q8NGQ2	sp|Q8NGQ2|OR6Q1_HUMAN Olfactory receptor 6Q1 OS=Homo sapiens OX=9606 GN=OR6Q1 PE=2 SV=2	126	RYVAICMPLHYGAFVSWGTCIRLAAACWLVG
0.1	Q8NGP6	sp|Q8NGP6|OR5M8_HUMAN Olfactory receptor 5M8 OS=Homo sapiens OX=9606 GN=OR5M8 PE=2 SV=1	81	LEIFLSEKKSISYPACLVQCYLFIALVHVEI
0.1	Q15622	sp|Q15622|OR7A5_HUMAN Olfactory receptor 7A5 OS=Homo sapiens OX=9606 GN=OR7A5 PE=2 SV=2	122	RFVAICHPLHYMVIMNPHLCGLLVLASWTMS
0.1	P47893	sp|P47893|OR3A2_HUMAN Olfactory receptor 3A2 OS=Homo sapiens OX=9606 GN=OR3A2 PE=2 SV=3	120	DCFLLTAMAYDRLLAICQPLTYSTRMSQTVQ
0.1	Q6J4K2	sp|Q6J4K2|NCLX_HUMAN Mitochondrial sodium/calcium exchanger protein OS=Homo sapiens OX=9606 GN=SLC8B1 PE=1 SV=2	70	TNPDCHSDGGYLDYLEGIFCHFPPSLLPLAV
0.1	Q9NRC1	sp|Q9NRC1|ST7_HUMAN Suppressor of tumorigenicity 7 protein OS=Homo sapiens OX=9606 GN=ST7 PE=1 SV=1	542	VFAKAMIDIFCSAEFRDWNCKSIFMRVEDEL
0.1	O75324	sp|O75324|SNN_HUMAN Stannin OS=Homo sapiens OX=9606 GN=SNN PE=1 SV=1	31	GCWCYLRLQRISQSEDEESIVGDGETKEPFL
0.1	Q9NS64	sp|Q9NS64|RPRM_HUMAN Protein reprimo OS=Homo sapiens OX=9606 GN=RPRM PE=1 SV=1	26	AVRCCTQASVVTDDGFAEGGPDERSLYIMRV
0.1	Q8N4K4	sp|Q8N4K4|RPRML_HUMAN Reprimo-like protein OS=Homo sapiens OX=9606 GN=RPRML PE=2 SV=2	37	GCCPGGAPLAASDGVPAGLAPDERSLWVSRV
0.1	Q9Y6U7	sp|Q9Y6U7|RN215_HUMAN RING finger protein 215 OS=Homo sapiens OX=9606 GN=RNF215 PE=4 SV=2	221	WTTCGLSKDGYGGWQDLVCLGGSRAQEQKPL
0.1	P98161	sp|P98161|PKD1_HUMAN Polycystin-1 OS=Homo sapiens OX=9606 GN=PKD1 PE=1 SV=3	4048	VSSCVDSLWSVAQALLVLCPGTGLSTLCPAE
0.1	Q9Y5F2	sp|Q9Y5F2|PCDBB_HUMAN Protocadherin beta-11 OS=Homo sapiens OX=9606 GN=PCDHB11 PE=2 SV=1	711	VRLCRRSRAASVGSCSVPKGPFPGHLVDVSG
0.1	Q9BRQ5	sp|Q9BRQ5|ORAI3_HUMAN Protein orai-3 OS=Homo sapiens OX=9606 GN=ORAI3 PE=1 SV=2	214	SASAAPSQAEPACPPRQACGGGGAHGPGWQA
0.1	Q8NGJ6	sp|Q8NGJ6|O51A4_HUMAN Olfactory receptor 51A4 OS=Homo sapiens OX=9606 GN=OR51A4 PE=2 SV=1	162	PFTLRNLRYCKKNQLSHSYCLHQDVMKLACS
0.1	Q8WZ84	sp|Q8WZ84|OR8D1_HUMAN Olfactory receptor 8D1 OS=Homo sapiens OX=9606 GN=OR8D1 PE=2 SV=1	122	RYVAICSPLLYNAIMSSWVCSLLVLAAFFLG
0.1	Q8NGP3	sp|Q8NGP3|OR5M9_HUMAN Olfactory receptor 5M9 OS=Homo sapiens OX=9606 GN=OR5M9 PE=3 SV=1	80	LENLLSETKTISYVGCLVQCYFFIAVVHVEV
0.1	Q8NGK6	sp|Q8NGK6|O52I1_HUMAN Olfactory receptor 52I1 OS=Homo sapiens OX=9606 GN=OR52I1 PE=3 SV=2	50	VTAIWMDSTRHEPMYCFLCVLAAVDIVMASS
0.1	Q8NGH7	sp|Q8NGH7|O52L1_HUMAN Olfactory receptor 52L1 OS=Homo sapiens OX=9606 GN=OR52L1 PE=1 SV=4	138	LDCYVAICHPLHHSTILHPGVIGCIGMVVLV
0.1	Q8N148	sp|Q8N148|OR6V1_HUMAN Olfactory receptor 6V1 OS=Homo sapiens OX=9606 GN=OR6V1 PE=2 SV=1	120	RFVAICHPLRYGTLMSRAMCVQLAGAAWAAP
0.1	O43761	sp|O43761|SNG3_HUMAN Synaptogyrin-3 OS=Homo sapiens OX=9606 GN=SYNGR3 PE=1 SV=2	50	NTDSGPELRCVFNGNAGACRFGVALGLGAFL
0.1	Q99808	sp|Q99808|S29A1_HUMAN Equilibrative nucleoside transporter 1 OS=Homo sapiens OX=9606 GN=SLC29A1 PE=1 SV=3	203	ESAFGYFITACAVIILTIICYLGLPRLEFYR
0.1	P78382	sp|P78382|S35A1_HUMAN CMP-sialic acid transporter OS=Homo sapiens OX=9606 GN=SLC35A1 PE=1 SV=1	112	LDAAVYQVTYQLKIPCTALCTVLMLNRTLSK
0.1	Q03395	sp|Q03395|ROM1_HUMAN Rod outer segment membrane protein 1 OS=Homo sapiens OX=9606 GN=ROM1 PE=1 SV=2	38	CSGHLLVQLRHLGTFLAPSCQFPVLPQAALA
0.1	Q8TC41	sp|Q8TC41|RN217_HUMAN Probable E3 ubiquitin-protein ligase RNF217 OS=Homo sapiens OX=9606 GN=RNF217 PE=2 SV=4	523	FPIYCLCKKQRKRSRTGMHW
0.1	Q8TBJ4	sp|Q8TBJ4|PLPR1_HUMAN Phospholipid phosphatase-related protein type 1 OS=Homo sapiens OX=9606 GN=PLPPR1 PE=1 SV=1	33	YYFECTDTFQVHIQGFFCQDGDLMKPYPGTE
0.1	O43749	sp|O43749|OR1F1_HUMAN Olfactory receptor 1F1 OS=Homo sapiens OX=9606 GN=OR1F1 PE=2 SV=1	53	SCLHTPMYFFLSNLSFVDICFSFTTVPKMLA
0.1	Q92617	sp|Q92617|NPIB3_HUMAN Nuclear pore complex-interacting protein family member B3 OS=Homo sapiens OX=9606 GN=NPIPB3 PE=1 SV=5	33	CPCEYLRKVINTLADHHHRGTDFGGSPWLHV
0.1	O43908	sp|O43908|NKG2F_HUMAN NKG2-F type II integral membrane protein OS=Homo sapiens OX=9606 GN=KLRC4 PE=2 SV=2	101	EQNNFSLNRRMQKARHCGHCPEEWITYSNSC
0.1	O60391	sp|O60391|NMD3B_HUMAN Glutamate receptor ionotropic	NMDA 3B OS=Homo sapiens OX=9606 GN=GRIN3B PE=2 SV=2	620
0.1	Q9GZQ4	sp|Q9GZQ4|NMUR2_HUMAN Neuromedin-U receptor 2 OS=Homo sapiens OX=9606 GN=NMUR2 PE=1 SV=2	111	PFLFGPVGCYFKTALFETVCFASILSITTVS
0.1	Q587I9	sp|Q587I9|SFT2C_HUMAN Vesicle transport protein SFT2C OS=Homo sapiens OX=9606 GN=SFT2D3 PE=2 SV=1	64	GLTCLPSVTRGQRLAAGGGCLLLAALCFGLA
0.1	P47872	sp|P47872|SCTR_HUMAN Secretin receptor OS=Homo sapiens OX=9606 GN=SCTR PE=2 SV=2	153	SLVMLLVALGILCAFRRLHCTRNYIHMHLFV
0.1	Q9BXS9	sp|Q9BXS9|S26A6_HUMAN Solute carrier family 26 member 6 OS=Homo sapiens OX=9606 GN=SLC26A6 PE=1 SV=1	387	NLIGGIFQCFPVSCSMSRSLVQESTGGNSQV
0.1	Q7RTT9	sp|Q7RTT9|S29A4_HUMAN Equilibrative nucleoside transporter 4 OS=Homo sapiens OX=9606 GN=SLC29A4 PE=1 SV=1	362	VTYFITLCLFPGLESEIRHCILGEWLPILIM
0.1	Q8NFJ5	sp|Q8NFJ5|RAI3_HUMAN Retinoic acid-induced protein 3 OS=Homo sapiens OX=9606 GN=GPRC5A PE=1 SV=2	4	TVPDGCRNGLKSKYYRLCDKAEAWGIVLETV
0.1	Q8IYL9	sp|Q8IYL9|PSYR_HUMAN Psychosine receptor OS=Homo sapiens OX=9606 GN=GPR65 PE=1 SV=1	151	WEDETVVEYCDAEKSNFTLCYDKYPLEKWQI
0.1	P23942	sp|P23942|PRPH2_HUMAN Peripherin-2 OS=Homo sapiens OX=9606 GN=PRPH2 PE=1 SV=1	70	LSCVFNSLAGKICYDALDPAKYARWKPWLKP
0.1	Q9BX79	sp|Q9BX79|STRA6_HUMAN Receptor for retinol uptake STRA6 OS=Homo sapiens OX=9606 GN=STRA6 PE=1 SV=1	266	TSKHGFLSWARVCLRHCIYTPQPGFHLPLKL
0.1	Q9UBI4	sp|Q9UBI4|STML1_HUMAN Stomatin-like protein 1 OS=Homo sapiens OX=9606 GN=STOML1 PE=1 SV=1	36	ERGGVGTGADVPQSWPSCLCHGLISFLGFLL
0.1	Q9H3T2	sp|Q9H3T2|SEM6C_HUMAN Semaphorin-6C OS=Homo sapiens OX=9606 GN=SEMA6C PE=2 SV=4	625	VSCACRRAHRRRGKDIETPGLPRPLSLRSLA
0.1	P31213	sp|P31213|S5A2_HUMAN 3-oxo-5-alpha-steroid 4-dehydrogenase 2 OS=Homo sapiens OX=9606 GN=SRD5A2 PE=1 SV=1	116	TAFCTGNGVLQGYYLIYCAEYPDGWYTDIRF
0.1	Q86VW1	sp|Q86VW1|S22AG_HUMAN Solute carrier family 22 member 16 OS=Homo sapiens OX=9606 GN=SLC22A16 PE=1 SV=1	266	TWWLYQMILSTVTVPFILCCWVLPETPFWLL
0.1	Q96LT4	sp|Q96LT4|SAMD8_HUMAN Sphingomyelin synthase-related protein 1 OS=Homo sapiens OX=9606 GN=SAMD8 PE=1 SV=2	225	RSILLRRLCSLMGTVFLLRCFTMFVTSLSVP
0.1	O14684	sp|O14684|PTGES_HUMAN Prostaglandin E synthase OS=Homo sapiens OX=9606 GN=PTGES PE=1 SV=2	49	DALRHGGPQYCRSDPDVERCLRAHRNDMETI
0.1	A5PLL7	sp|A5PLL7|PDES1_HUMAN Plasmanylethanolamine desaturase OS=Homo sapiens OX=9606 GN=PEDS1 PE=1 SV=3	17	DEASCCRWGAQHAGARELAALYSPGKRLQEW
0.1	Q9UN71	sp|Q9UN71|PCDGG_HUMAN Protocadherin gamma-B4 OS=Homo sapiens OX=9606 GN=PCDHGB4 PE=2 SV=1	711	LRLRRSSSPASWSCFQPGLCVKSESVVPPNY
0.1	Q9Y5E8	sp|Q9Y5E8|PCDBF_HUMAN Protocadherin beta-15 OS=Homo sapiens OX=9606 GN=PCDHB15 PE=2 SV=1	711	VRLCRRSRAASVGRCSVPEGPFPGHLVDVSG
0.1	Q8NGR9	sp|Q8NGR9|OR1N2_HUMAN Olfactory receptor 1N2 OS=Homo sapiens OX=9606 GN=OR1N2 PE=2 SV=2	139	RYVAICQPLHYSTSMSPQLCALMLGVCWVLT
0.1	Q9H341	sp|Q9H341|O51M1_HUMAN Olfactory receptor 51M1 OS=Homo sapiens OX=9606 GN=OR51M1 PE=3 SV=4	97	FWFNSHSIYFGACQIQMFCIHSFSFMESSVL
0.1	Q8NGS8	sp|Q8NGS8|O13C5_HUMAN Olfactory receptor 13C5 OS=Homo sapiens OX=9606 GN=OR13C5 PE=2 SV=1	110	TECVLLGVMAFDRYVAICNPLRYPIIMSKDA
0.1	A6NM03	sp|A6NM03|O2AG2_HUMAN Olfactory receptor 2AG2 OS=Homo sapiens OX=9606 GN=OR2AG2 PE=2 SV=1	122	RYVAICHPLKYMTLMSPRVCWIMVATSWILA
0.1	A6NKK0	sp|A6NKK0|OR5H1_HUMAN Olfactory receptor 5H1 OS=Homo sapiens OX=9606 GN=OR5H1 PE=1 SV=1	122	RYVAICKPLLYPAIMTNGLCIRLLILSYVGG
0.1	A6ND48	sp|A6ND48|O14I1_HUMAN Olfactory receptor 14I1 OS=Homo sapiens OX=9606 GN=OR14I1 PE=1 SV=1	120	RYVAICHPLQYRAVMTSGGCYQMAVTTWLSC
0.1	A6NFY4	sp|A6NFY4|NEMP2_HUMAN Nuclear envelope integral membrane protein 2 OS=Homo sapiens OX=9606 GN=NEMP2 PE=2 SV=3	205	YSTFWALMVGCWFASVYIVCQLMEDLKWLWY
0.1	Q8NC67	sp|Q8NC67|NETO2_HUMAN Neuropilin and tolloid-like protein 2 OS=Homo sapiens OX=9606 GN=NETO2 PE=1 SV=1	318	GVQNCAYPWDENHCKEKKKAGVFEQITKTHG
0.1	Q96T83	sp|Q96T83|SL9A7_HUMAN Sodium/hydrogen exchanger 7 OS=Homo sapiens OX=9606 GN=SLC9A7 PE=1 SV=1	370	STFLLAEACGFTGVVAVLFCGITQAHYTYNN
0.1	Q12770	sp|Q12770|SCAP_HUMAN Sterol regulatory element-binding protein cleavage-activating protein OS=Homo sapiens OX=9606 GN=SCAP PE=1 SV=4	39	ACCYPLLKLPLPGTGPVEFTTPVKDYSPPPV
0.1	Q9H5K3	sp|Q9H5K3|SG196_HUMAN Protein O-mannose kinase OS=Homo sapiens OX=9606 GN=POMK PE=1 SV=1	49	TVDPTHCPYGHFRIGQMKNCSPWLSCEELRT
0.1	Q6YBV0	sp|Q6YBV0|S36A4_HUMAN Proton-coupled amino acid transporter 4 OS=Homo sapiens OX=9606 GN=SLC36A4 PE=1 SV=1	107	MHILVRCSHFLCLRFKKSTLGYSDTVSFAME
0.1	P05187	sp|P05187|PPB1_HUMAN Alkaline phosphatase	placental type OS=Homo sapiens OX=9606 GN=ALPP PE=1 SV=2	483
0.1	Q92535	sp|Q92535|PIGC_HUMAN Phosphatidylinositol N-acetylglucosaminyltransferase subunit C OS=Homo sapiens OX=9606 GN=PIGC PE=1 SV=1	50	AVVFESSVVIQQLCSVCVFVVIWWYMDEGLL
0.1	Q3MUY2	sp|Q3MUY2|PIGY_HUMAN Phosphatidylinositol N-acetylglucosaminyltransferase subunit Y OS=Homo sapiens OX=9606 GN=PIGY PE=1 SV=1	26	VEENFPQGCTSTASLCFYSLLLPITIPVYVF
0.1	Q8NG94	sp|Q8NG94|O11H1_HUMAN Olfactory receptor 11H1 OS=Homo sapiens OX=9606 GN=OR11H1 PE=3 SV=3	179	SQMPFCGPNIIDHVVCDPGPRFALDCVSAPR
0.1	Q8NH67	sp|Q8NH67|O52I2_HUMAN Olfactory receptor 52I2 OS=Homo sapiens OX=9606 GN=OR52I2 PE=2 SV=3	76	VTAIWMDSTRHEPMYCFLCVLAAVDIVMASS
0.1	Q8NH42	sp|Q8NH42|OR4KD_HUMAN Olfactory receptor 4K13 OS=Homo sapiens OX=9606 GN=OR4K13 PE=3 SV=1	160	MAFMLTLPFCGPNVIDSFFCDLPLVIKLACK
0.1	Q8NGX9	sp|Q8NGX9|OR6P1_HUMAN Olfactory receptor 6P1 OS=Homo sapiens OX=9606 GN=OR6P1 PE=3 SV=1	110	TECVLLAVMAYDRYLAICGPLLYPSLMPSSL
0.1	A6NMB1	sp|A6NMB1|SIG16_HUMAN Sialic acid-binding Ig-like lectin 16 OS=Homo sapiens OX=9606 GN=SIGLEC16 PE=2 SV=3	408	CHARHPLGSQRVSLSFSVHCKSGPMTGVVLV
0.1	Q9P283	sp|Q9P283|SEM5B_HUMAN Semaphorin-5B OS=Homo sapiens OX=9606 GN=SEMA5B PE=2 SV=4	1057	LSCQHCQRQSQESTLVHPATPNHLHYKGGGT
0.1	Q96CQ1	sp|Q96CQ1|S2536_HUMAN Solute carrier family 25 member 36 OS=Homo sapiens OX=9606 GN=SLC25A36 PE=1 SV=1	11	FAGGCGGTVGAILTCPLEVVKTRLQSSSVTL
0.1	Q9GZN6	sp|Q9GZN6|S6A16_HUMAN Orphan sodium- and chloride-dependent neurotransmitter transporter NTT5 OS=Homo sapiens OX=9606 GN=SLC6A16 PE=2 SV=1	120	SMKPSCLWRFAYLWLNSGGCSFAAIYIFMLF
0.1	Q14542	sp|Q14542|S29A2_HUMAN Equilibrative nucleoside transporter 2 OS=Homo sapiens OX=9606 GN=SLC29A2 PE=1 SV=3	190	TSALGYFITPCVGILMSIVCYLSLPHLKFAR
0.1	Q9Y2P5	sp|Q9Y2P5|S27A5_HUMAN Bile acyl-CoA synthetase OS=Homo sapiens OX=9606 GN=SLC27A5 PE=1 SV=1	26	PVAVALTLRWLLGDPTCCVLLGLAMLARPWL
0.1	Q02161	sp|Q02161|RHD_HUMAN Blood group Rh(D) polypeptide OS=Homo sapiens OX=9606 GN=RHD PE=1 SV=3	307	GGAKYLPGCCNRVLGIPHSSIMGYNFSLLGL
0.1	Q9NRZ7	sp|Q9NRZ7|PLCC_HUMAN 1-acyl-sn-glycerol-3-phosphate acyltransferase gamma OS=Homo sapiens OX=9606 GN=AGPAT3 PE=1 SV=1	95	NHNFEIDFLCGWTMCERFGVLGSSKVLAKKE
0.1	P43115	sp|P43115|PE2R3_HUMAN Prostaglandin E2 receptor EP3 subtype OS=Homo sapiens OX=9606 GN=PTGER3 PE=1 SV=1	307	FNQTSVEHCKTHTEKQKECNFFLIAVRLASL
0.1	Q9Y5E1	sp|Q9Y5E1|PCDB9_HUMAN Protocadherin beta-9 OS=Homo sapiens OX=9606 GN=PCDHB9 PE=2 SV=2	711	VRLCRRSRAASVGRCSVPEGPFPGHLVDVSG
0.1	Q9Y5H9	sp|Q9Y5H9|PCDA2_HUMAN Protocadherin alpha-2 OS=Homo sapiens OX=9606 GN=PCDHA2 PE=1 SV=1	722	RCSVPPTEGARAPGKPTLVCSSAVGSWSYSQ
0.1	Q86VL8	sp|Q86VL8|S47A2_HUMAN Multidrug and toxin extrusion protein 2 OS=Homo sapiens OX=9606 GN=SLC47A2 PE=1 SV=1	4	LQDTVALDHGGCCPALSRLVPRGFGTEMWTL
0.1	Q8TCC7	sp|Q8TCC7|S22A8_HUMAN Solute carrier family 22 member 8 OS=Homo sapiens OX=9606 GN=SLC22A8 PE=1 SV=1	409	TVRTVLAVFGKGCLSSSFSCLFLYTSELYPT
0.1	Q9BXP2	sp|Q9BXP2|S12A9_HUMAN Solute carrier family 12 member 9 OS=Homo sapiens OX=9606 GN=SLC12A9 PE=1 SV=1	447	FRPTFSLFSWHTCLLGVASCLLMMFLISPGA
0.1	Q9P0L9	sp|Q9P0L9|PK2L1_HUMAN Polycystic kidney disease 2-like 1 protein OS=Homo sapiens OX=9606 GN=PKD2L1 PE=1 SV=1	355	CEVIFCVFIFYYVVEEILELHIHRLRYLSSI
0.1	Q9NZM6	sp|Q9NZM6|PK2L2_HUMAN Polycystic kidney disease 2-like 2 protein OS=Homo sapiens OX=9606 GN=PKD2L2 PE=2 SV=2	285	CEITFCIFLFVFTTQEVKKIKEFKSAYFKSI
0.1	Q9BRB3	sp|Q9BRB3|PIGQ_HUMAN Phosphatidylinositol N-acetylglucosaminyltransferase subunit Q OS=Homo sapiens OX=9606 GN=PIGQ PE=1 SV=3	400	YCFYVYGARLYCLKIHGLSSLWRLFRGKKWN
0.1	P59922	sp|P59922|OR2B8_HUMAN Putative olfactory receptor 2B8 OS=Homo sapiens OX=9606 GN=OR2B8P PE=5 SV=1	120	FDRYAAVCRPLHYTVVMHPCLYVLMASTSWV
0.1	Q8NGQ1	sp|Q8NGQ1|OR9G4_HUMAN Olfactory receptor 9G4 OS=Homo sapiens OX=9606 GN=OR9G4 PE=3 SV=2	93	TPKILASCVSEDKRISLAGCGAQLFFSCVVA
0.1	Q8NGP9	sp|Q8NGP9|O5AR1_HUMAN Olfactory receptor 5AR1 OS=Homo sapiens OX=9606 GN=OR5AR1 PE=3 SV=1	122	RFVAICRPLHYSTFMSKQVCLALMLGSYLAG
0.1	Q9UKL2	sp|Q9UKL2|O52A1_HUMAN Olfactory receptor 52A1 OS=Homo sapiens OX=9606 GN=OR52A1 PE=2 SV=2	27	CWIGIPFCAIYLIAMIGNSLLLSIIKSERSL
0.1	Q8NGD2	sp|Q8NGD2|OR4K2_HUMAN Olfactory receptor 4K2 OS=Homo sapiens OX=9606 GN=OR4K2 PE=2 SV=1	122	RYIAICKPLHYASVISPQVCVALVVASWIMG
0.1	Q8IXE1	sp|Q8IXE1|OR4N5_HUMAN Olfactory receptor 4N5 OS=Homo sapiens OX=9606 GN=OR4N5 PE=3 SV=1	122	RYIAICRPLHYSTIMNPRACYALSLVLWLGG
0.1	Q8NGC2	sp|Q8NGC2|OR4E2_HUMAN Olfactory receptor 4E2 OS=Homo sapiens OX=9606 GN=OR4E2 PE=3 SV=1	90	KTISFDNCITQLFFLHLFACAEIFLLIIVAY
0.1	Q8TDU9	sp|Q8TDU9|RL3R2_HUMAN Relaxin-3 receptor 2 OS=Homo sapiens OX=9606 GN=RXFP4 PE=1 SV=1	175	PTAVFGVEGEVCGVRLCLLRFPSRYWLGAYQ
0.1	Q8NGR3	sp|Q8NGR3|OR1K1_HUMAN Olfactory receptor 1K1 OS=Homo sapiens OX=9606 GN=OR1K1 PE=2 SV=1	123	CYVAIRHPLPYATRMSRAMCAALVGMAWLVS
0.1	Q8NH10	sp|Q8NH10|OR8U1_HUMAN Olfactory receptor 8U1 OS=Homo sapiens OX=9606 GN=OR8U1 PE=3 SV=1	84	NFLYKQNVISFDACATQLGCFLTFMISESLL
0.1	Q93086	sp|Q93086|P2RX5_HUMAN P2X purinoceptor 5 OS=Homo sapiens OX=9606 GN=P2RX5 PE=2 SV=4	1	MGQAGCKGLCLSLFDYKTEKYVIAKNKKVGL
0.1	Q8NG75	sp|Q8NG75|OR5T1_HUMAN Olfactory receptor 5T1 OS=Homo sapiens OX=9606 GN=OR5T1 PE=2 SV=1	98	LAKNKSISFLGCATQMFLACTFGTTECFLLA
0.1	A6NF89	sp|A6NF89|OR6C6_HUMAN Olfactory receptor 6C6 OS=Homo sapiens OX=9606 GN=OR6C6 PE=3 SV=1	120	RYVAICKPLHYPIIMSSKVCYQLVLSSWVTG
0.1	Q8NGR4	sp|Q8NGR4|OR5C1_HUMAN Olfactory receptor 5C1 OS=Homo sapiens OX=9606 GN=OR5C1 PE=2 SV=1	114	TECCLLAAMAYDRYVAIRNPLLYTTAMSQRL
0.1	Q8NGS6	sp|Q8NGS6|O13C3_HUMAN Olfactory receptor 13C3 OS=Homo sapiens OX=9606 GN=OR13C3 PE=2 SV=2	140	TECLLLGMMAFDRYVAICNPLRYPIILSKVA
0.1	Q8NGK2	sp|Q8NGK2|O52B4_HUMAN Olfactory receptor 52B4 OS=Homo sapiens OX=9606 GN=OR52B4 PE=3 SV=2	59	EPMYLFLCMLAGADIVLSTCTIPQALAIFWF
0.1	Q8NGX5	sp|Q8NGX5|O10K1_HUMAN Olfactory receptor 10K1 OS=Homo sapiens OX=9606 GN=OR10K1 PE=2 SV=1	53	RALHTPMYFFLAILSCSEICYTFVIVPKMLV
0.1	Q8NGE8	sp|Q8NGE8|OR4D9_HUMAN Olfactory receptor 4D9 OS=Homo sapiens OX=9606 GN=OR4D9 PE=3 SV=3	160	ISLLLPLPFCGPNVLDTFYCDVPQVLKLACT
0.1	P0DN81	sp|P0DN81|O13C7_HUMAN Olfactory receptor 13C7 OS=Homo sapiens OX=9606 GN=OR13C7 PE=3 SV=1	161	TSLAMRLPFCGDNIINHFTCEILAVLKLACA
0.1	P03915	sp|P03915|NU5M_HUMAN NADH-ubiquinone oxidoreductase chain 5 OS=Homo sapiens OX=9606 GN=MT-ND5 PE=1 SV=2	272	LIQTLTLCLGAITTLFAAVCALTQNDIKKIV
0.1	Q9Y328	sp|Q9Y328|NSG2_HUMAN Neuronal vesicle trafficking-associated protein 2 OS=Homo sapiens OX=9606 GN=NSG2 PE=1 SV=1	93	KAFTYDHSCPEGFVYKHKRCIPASLDAYYSS
0.1	O43194	sp|O43194|GPR39_HUMAN G-protein coupled receptor 39 OS=Homo sapiens OX=9606 GN=GPR39 PE=1 SV=1	99	LTTSSYTLSCKLHTFLFEACSYATLLHVLTL
0.1	Q9NS66	sp|Q9NS66|GP173_HUMAN Probable G-protein coupled receptor 173 OS=Homo sapiens OX=9606 GN=GPR173 PE=1 SV=1	56	APYYFLLDLCLADGIRSAVCFPFVLASVRHG
0.1	P21462	sp|P21462|FPR1_HUMAN fMet-Leu-Phe receptor OS=Homo sapiens OX=9606 GN=FPR1 PE=1 SV=3	121	LDRCVCVLHPVWTQNHRTVSLAKKVIIGPWV
0.1	Q9UP38	sp|Q9UP38|FZD1_HUMAN Frizzled-1 OS=Homo sapiens OX=9606 GN=FZD1 PE=1 SV=2	293	EKDCGAPCEPTKVYGLMYFGPEELRFSRTWI
0.1	Q6ZRH7	sp|Q6ZRH7|CTSRG_HUMAN Cation channel sperm-associated protein subunit gamma OS=Homo sapiens OX=9606 GN=CATSPERG PE=2 SV=3	1087	FCLLWPLVVKGCTMIRWKINNLIASESYYTY
0.1	Q6MZM0	sp|Q6MZM0|HPHL1_HUMAN Ferroxidase HEPHL1 OS=Homo sapiens OX=9606 GN=HEPHL1 PE=1 SV=2	1135	LRLCSAMKQTDYQQVQSCALPTDAL
0.1	Q8IZP7	sp|Q8IZP7|H6ST3_HUMAN Heparan-sulfate 6-O-sulfotransferase 3 OS=Homo sapiens OX=9606 GN=HS6ST3 PE=2 SV=3	27	SPSCTSSCTNFGEQPRAGEAGPPAVPGPARR
0.1	Q14789	sp|Q14789|GOGB1_HUMAN Golgin subfamily B member 1 OS=Homo sapiens OX=9606 GN=GOLGB1 PE=1 SV=2	3211	NSCRRTRSGVGWKRVLRSLCHSRTRVPLLAA
0.1	Q9NPR9	sp|Q9NPR9|GP108_HUMAN Protein GPR108 OS=Homo sapiens OX=9606 GN=GPR108 PE=1 SV=3	264	YMVMSACFLAAGIFWVSILCRNTYSVFKIHW
0.1	P61073	sp|P61073|CXCR4_HUMAN C-X-C chemokine receptor type 4 OS=Homo sapiens OX=9606 GN=CXCR4 PE=1 SV=1	216	LSCYCIIISKLSHSKGHQKRKALKTTVILIL
0.1	Q6UXK2	sp|Q6UXK2|ISLR2_HUMAN Immunoglobulin superfamily containing leucine-rich repeat protein 2 OS=Homo sapiens OX=9606 GN=ISLR2 PE=1 SV=1	560	PGTNYSVCLALAGEACHVQVVFSTKKELPSL
0.1	Q9Y287	sp|Q9Y287|ITM2B_HUMAN Integral membrane protein 2B OS=Homo sapiens OX=9606 GN=ITM2B PE=1 SV=1	35	AVDCKDPDDVVPVGQRRAWCWCMCFGLAFML
0.1	P11166	sp|P11166|GTR1_HUMAN Solute carrier family 2	facilitated glucose transporter member 1 OS=Homo sapiens OX=9606 GN=SLC2A1 PE=1 SV=2	410
0.1	Q7Z602	sp|Q7Z602|GP141_HUMAN Probable G-protein coupled receptor 141 OS=Homo sapiens OX=9606 GN=GPR141 PE=2 SV=1	258	CNSKVAFYNEIFLSVTAISCYDLLLFVFGGS
0.1	O75388	sp|O75388|GPR32_HUMAN Probable G-protein coupled receptor 32 OS=Homo sapiens OX=9606 GN=GPR32 PE=2 SV=1	15	QPGVLTRDRSCSRKMNSSGCLSEEVGSLRPL
0.1	Q96P69	sp|Q96P69|GPR78_HUMAN G-protein coupled receptor 78 OS=Homo sapiens OX=9606 GN=GPR78 PE=1 SV=2	28	LCCAYSAELRTRASGVLLVNLSLGHLLLAAL
0.1	Q9BXC1	sp|Q9BXC1|GP174_HUMAN Probable G-protein coupled receptor 174 OS=Homo sapiens OX=9606 GN=GPR174 PE=2 SV=1	75	RIFYYLNHDWPFGPGLCMFCFYLKYVNMYAS
0.1	O75911	sp|O75911|DHRS3_HUMAN Short-chain dehydrogenase/reductase 3 OS=Homo sapiens OX=9606 GN=DHRS3 PE=1 SV=2	170	IVCLNSVLALSAIPGAIDYCTSKASAFAFME
0.1	Q5H9S7	sp|Q5H9S7|DCA17_HUMAN DDB1- and CUL4-associated factor 17 OS=Homo sapiens OX=9606 GN=DCAF17 PE=1 SV=1	242	AEQFMQQKLDLGCACRWGGTTGTVGEAPFGI
0.1	Q9H7T0	sp|Q9H7T0|CTSRB_HUMAN Cation channel sperm-associated protein subunit beta OS=Homo sapiens OX=9606 GN=CATSPERB PE=2 SV=2	170	SEISKLYPHVVDLKVTKCPCANDVALLGFIV
0.1	Q8TAF8	sp|Q8TAF8|LHPL5_HUMAN LHFPL tetraspan subfamily member 5 protein OS=Homo sapiens OX=9606 GN=LHFPL5 PE=1 SV=1	120	ICNTATVYKICAWMQLAAATGLMIGCLVYPD
0.1	O75144	sp|O75144|ICOSL_HUMAN ICOS ligand OS=Homo sapiens OX=9606 GN=ICOSLG PE=1 SV=2	277	CRDRCLQHSYAGAWAVSPETELTGHV
0.1	P11169	sp|P11169|GTR3_HUMAN Solute carrier family 2	facilitated glucose transporter member 3 OS=Homo sapiens OX=9606 GN=SLC2A3 PE=1 SV=1	92
0.1	O00270	sp|O00270|GPR31_HUMAN 12-(S)-hydroxy-5	8	10
0.1	Q9NU53	sp|Q9NU53|GINM1_HUMAN Glycoprotein integral membrane protein 1 OS=Homo sapiens OX=9606 GN=GINM1 PE=1 SV=1	239	KVMCQWMEKFRKDLCRFWSNVFPVFFQFLNI
0.1	P25089	sp|P25089|FPR3_HUMAN N-formyl peptide receptor 3 OS=Homo sapiens OX=9606 GN=FPR3 PE=2 SV=2	121	LDRCICVLHPAWAQNHRTMSLAKRVMTGLWI
0.1	Q9Y5Y0	sp|Q9Y5Y0|FLVC1_HUMAN Feline leukemia virus subgroup C receptor-related protein 1 OS=Homo sapiens OX=9606 GN=FLVCR1 PE=1 SV=1	173	LRLTALLGSGLNCLGAWIKCGSVQQHLFWVT
0.1	O14638	sp|O14638|ENPP3_HUMAN Ectonucleotide pyrophosphatase/phosphodiesterase family member 3 OS=Homo sapiens OX=9606 GN=ENPP3 PE=1 SV=2	39	LGLGLGLRKLEKQGSCRKKCFDASFRGLENC
0.1	Q9UNE0	sp|Q9UNE0|EDAR_HUMAN Tumor necrosis factor receptor superfamily member EDAR OS=Homo sapiens OX=9606 GN=EDAR PE=1 SV=1	208	FYILKTKPSAPACCTSHPGKSVEAQVSKDEE
0.1	Q9Y6W8	sp|Q9Y6W8|ICOS_HUMAN Inducible T-cell costimulator OS=Homo sapiens OX=9606 GN=ICOS PE=1 SV=1	118	PFKVTLTGGYLHIYESQLCCQLKFWLPIGCA
0.1	P49019	sp|P49019|HCAR3_HUMAN Hydroxycarboxylic acid receptor 3 OS=Homo sapiens OX=9606 GN=HCAR3 PE=1 SV=3	1	MNRHHLQDHFLEIDKKNCCVFRDDFIAKVLP
0.1	O95528	sp|O95528|GTR10_HUMAN Solute carrier family 2	facilitated glucose transporter member 10 OS=Homo sapiens OX=9606 GN=SLC2A10 PE=1 SV=2	101
0.1	P48167	sp|P48167|GLRB_HUMAN Glycine receptor subunit beta OS=Homo sapiens OX=9606 GN=GLRB PE=1 SV=1	239	EYGNCTKYYKGTGYYTCVEVIFTLRRQVGFY
0.1	Q14831	sp|Q14831|GRM7_HUMAN Metabotropic glutamate receptor 7 OS=Homo sapiens OX=9606 GN=GRM7 PE=1 SV=1	561	QHCPYDQRPNENRTGCQDIPIIKLEWHSPWA
0.1	Q99679	sp|Q99679|GPR21_HUMAN Probable G-protein coupled receptor 21 OS=Homo sapiens OX=9606 GN=GPR21 PE=2 SV=1	9	QSSHPFCLLAFGYLETVNFCLLEVLIIVFLT
0.1	Q7Z601	sp|Q7Z601|GP142_HUMAN Probable G-protein coupled receptor 142 OS=Homo sapiens OX=9606 GN=GPR142 PE=2 SV=1	307	RTLDEVLKWAHCLTVYFIPCGVFLVTNSAII
0.1	Q6UXG2	sp|Q6UXG2|ELAP1_HUMAN Endosome/lysosome-associated apoptosis and autophagy regulator 1 OS=Homo sapiens OX=9606 GN=ELAPOR1 PE=1 SV=2	883	REPKLCSGGISLPEQRVTICKTIDFWLKVGI
0.1	P54852	sp|P54852|EMP3_HUMAN Epithelial membrane protein 3 OS=Homo sapiens OX=9606 GN=EMP3 PE=1 SV=1	35	ESLNLWYDCTWNNDTKTWACSNVSENGWLKA
0.1	P0DPD6	sp|P0DPD6|ECE2_HUMAN Endothelin-converting enzyme 2 OS=Homo sapiens OX=9606 GN=ECE2 PE=1 SV=1	127	LGVQYHRDPSHSTCLTEACIRVAGKILESLD
0.1	Q9Y653	sp|Q9Y653|AGRG1_HUMAN Adhesion G-protein coupled receptor G1 OS=Homo sapiens OX=9606 GN=ADGRG1 PE=1 SV=2	373	TQTSCFCNHLTYFAVLMVSSVEVDAVHKHYL
0.1	Q99758	sp|Q99758|ABCA3_HUMAN ATP-binding cassette sub-family A member 3 OS=Homo sapiens OX=9606 GN=ABCA3 PE=1 SV=2	393	APRYNWMTLSQKLCSCLLSNVAMAMGAQLIG
0.1	O95477	sp|O95477|ABCA1_HUMAN Phospholipid-transporting ATPase ABCA1 OS=Homo sapiens OX=9606 GN=ABCA1 PE=1 SV=3	745	LAAACGGIIYFTLYLPYVLCVAWQDYVGFTL
0.1	Q9NPI9	sp|Q9NPI9|KCJ16_HUMAN Inward rectifier potassium channel 16 OS=Homo sapiens OX=9606 GN=KCNJ16 PE=1 SV=1	124	FSLETQTTIGYGYRCVTEECSVAVLMVILQS
0.1	Q9ULH0	sp|Q9ULH0|KDIS_HUMAN Kinase D-interacting substrate of 220 kDa OS=Homo sapiens OX=9606 GN=KIDINS220 PE=1 SV=3	637	FRVFKTEDTQGKKKWKKTCCLPSFVIFLFII
0.1	Q3MIP1	sp|Q3MIP1|IPIL2_HUMAN Inositol 1	4	5-trisphosphate receptor-interacting protein-like 2 OS=Homo sapiens OX=9606 GN=ITPRIPL2 PE=1 SV=1
0.1	Q9ULV1	sp|Q9ULV1|FZD4_HUMAN Frizzled-4 OS=Homo sapiens OX=9606 GN=FZD4 PE=1 SV=2	185	GTNSDQYIWVKRSLNCVLKCGYDAGLYSRSA
0.1	P35575	sp|P35575|G6PC_HUMAN Glucose-6-phosphatase OS=Homo sapiens OX=9606 GN=G6PC PE=1 SV=2	148	FRCLNVILWLGFWAVQLNVCLSRIYLAAHFP
0.1	Q8N539	sp|Q8N539|FBCD1_HUMAN Fibrinogen C domain-containing protein 1 OS=Homo sapiens OX=9606 GN=FIBCD1 PE=1 SV=2	14	QLEDRPRDKPQRPSCGYVLCTVLLALAVLLA
0.1	Q9NY64	sp|Q9NY64|GTR8_HUMAN Solute carrier family 2	facilitated glucose transporter member 8 OS=Homo sapiens OX=9606 GN=SLC2A8 PE=1 SV=3	181
0.1	Q86UL3	sp|Q86UL3|GPAT4_HUMAN Glycerol-3-phosphate acyltransferase 4 OS=Homo sapiens OX=9606 GN=GPAT4 PE=1 SV=1	202	NGRFKEFMSKHVHLMCYRICVRALTAIITYH
0.1	Q14332	sp|Q14332|FZD2_HUMAN Frizzled-2 OS=Homo sapiens OX=9606 GN=FZD2 PE=1 SV=1	218	ERDCAAPCEPARPDGSMFFSQEETRFARLWI
0.1	O14681	sp|O14681|EI24_HUMAN Etoposide-induced protein 2.4 homolog OS=Homo sapiens OX=9606 GN=EI24 PE=1 SV=4	56	SIERKQESEPRIVSRIFQCCAWNGGVFWFSL
0.1	Q8NAC3	sp|Q8NAC3|I17RC_HUMAN Interleukin-17 receptor C OS=Homo sapiens OX=9606 GN=IL17RC PE=1 SV=2	510	LQSGQCLQLWDDDLGALWACPMDKYIHKRWA
0.1	Q8TDB8	sp|Q8TDB8|GTR14_HUMAN Solute carrier family 2	facilitated glucose transporter member 14 OS=Homo sapiens OX=9606 GN=SLC2A14 PE=1 SV=1	116
0.1	O95838	sp|O95838|GLP2R_HUMAN Glucagon-like peptide 2 receptor OS=Homo sapiens OX=9606 GN=GLP2R PE=2 SV=1	446	ELRKYWVRFLLARHSGCRACVLGKDFRFLGK
0.1	Q9H936	sp|Q9H936|GHC1_HUMAN Mitochondrial glutamate carrier 1 OS=Homo sapiens OX=9606 GN=SLC25A22 PE=1 SV=1	271	CARKILRHEGPSAFLKGAYCRALVIAPLFGI
0.1	Q9UPI3	sp|Q9UPI3|FLVC2_HUMAN Feline leukemia virus subgroup C receptor-related protein 2 OS=Homo sapiens OX=9606 GN=FLVCR2 PE=1 SV=1	78	IKVSRRRWAVVLVFSCYSMCNSFQWIQYGSI
0.1	O00548	sp|O00548|DLL1_HUMAN Delta-like protein 1 OS=Homo sapiens OX=9606 GN=DLL1 PE=1 SV=2	568	CVRLRLQKHRPPADPCRGETETMNNLANCQR
0.1	Q14500	sp|Q14500|KCJ12_HUMAN ATP-sensitive inward rectifier potassium channel 12 OS=Homo sapiens OX=9606 GN=KCNJ12 PE=1 SV=2	136	FSIETQTTIGYGLRCVTEECPVAVFMVVAQS
0.1	P42701	sp|P42701|I12R1_HUMAN Interleukin-12 receptor subunit beta-1 OS=Homo sapiens OX=9606 GN=IL12RB1 PE=1 SV=1	570	LNRAARHLCPPLPTPCASSAIEFPGGKETWQ
0.1	Q9H3N8	sp|Q9H3N8|HRH4_HUMAN Histamine H4 receptor OS=Homo sapiens OX=9606 GN=HRH4 PE=1 SV=2	79	EWDFGKEICVFWLTTDYLLCTASVYNIVLIS
0.1	Q4ZG55	sp|Q4ZG55|GREB1_HUMAN Protein GREB1 OS=Homo sapiens OX=9606 GN=GREB1 PE=2 SV=1	1838	LSVDCYLNLGSQISVCYVSSRPHSLNISCSD
0.1	Q96P66	sp|Q96P66|GP101_HUMAN Probable G-protein coupled receptor 101 OS=Homo sapiens OX=9606 GN=GPR101 PE=1 SV=1	376	LPPSRRNSNSNPPLPRCYQCKAAKVIFIIIF
0.1	Q16099	sp|Q16099|GRIK4_HUMAN Glutamate receptor ionotropic	kainate 4 OS=Homo sapiens OX=9606 GN=GRIK4 PE=2 SV=2	566
0.1	Q8TBE3	sp|Q8TBE3|FNDC9_HUMAN Fibronectin type III domain-containing protein 9 OS=Homo sapiens OX=9606 GN=FNDC9 PE=1 SV=2	133	LQFWCVRCHEPRWSYRAGHMEEANGLVRWPE
0.1	Q9NZU0	sp|Q9NZU0|FLRT3_HUMAN Leucine-rich repeat transmembrane protein FLRT3 OS=Homo sapiens OX=9606 GN=FLRT3 PE=1 SV=1	549	CWYVHRNGSLFSRNCAYSKGRRRKDDYAEAG
0.1	O60312	sp|O60312|AT10A_HUMAN Probable phospholipid-transporting ATPase VA OS=Homo sapiens OX=9606 GN=ATP10A PE=2 SV=2	1233	TCGFSVLLFFTVALIYNASCATCYPPSNPYW
0.1	Q9UHI5	sp|Q9UHI5|LAT2_HUMAN Large neutral amino acids transporter small subunit 2 OS=Homo sapiens OX=9606 GN=SLC7A8 PE=1 SV=1	159	SGLRLLAAICLLLLTWVNCSSVRWATRVQDI
0.1	P16389	sp|P16389|KCNA2_HUMAN Potassium voltage-gated channel subfamily A member 2 OS=Homo sapiens OX=9606 GN=KCNA2 PE=1 SV=2	225	VETLCIIWFSFEFLVRFFACPSKAGFFTNIM
0.1	Q9BX67	sp|Q9BX67|JAM3_HUMAN Junctional adhesion molecule C OS=Homo sapiens OX=9606 GN=JAM3 PE=1 SV=1	212	DDSGQYYCIASNDAGSARCEEQEMEVYDLNI
0.1	P25021	sp|P25021|HRH2_HUMAN Histamine H2 receptor OS=Homo sapiens OX=9606 GN=HRH2 PE=2 SV=1	1	MAPNGTASSFCLDSTACKITITVVLAVLILI
0.1	Q68CP4	sp|Q68CP4|HGNAT_HUMAN Heparan-alpha-glucosaminide N-acetyltransferase OS=Homo sapiens OX=9606 GN=HGSNAT PE=1 SV=2	332	GCSKFRLLGKIAWRSFLLICIGIIIVNPNYC
0.1	P13224	sp|P13224|GP1BB_HUMAN Platelet glycoprotein Ib beta chain OS=Homo sapiens OX=9606 GN=GP1BB PE=1 SV=1	128	LLPYLAEDELRAACAPGPLCWGALAAQLALL
0.1	Q8WUG5	sp|Q8WUG5|S22AH_HUMAN Solute carrier family 22 member 17 OS=Homo sapiens OX=9606 GN=SLC22A17 PE=2 SV=1	322	RHCYQPVGGGGSPSDFYLCSLLASGTAALAC
0.1	Q8TBB6	sp|Q8TBB6|S7A14_HUMAN Probable cationic amino acid transporter OS=Homo sapiens OX=9606 GN=SLC7A14 PE=1 SV=3	566	TICVLLLFILMFIFCSFIIFGSDYISEQSWW
0.1	Q8N162	sp|Q8N162|OR8H2_HUMAN Olfactory receptor 8H2 OS=Homo sapiens OX=9606 GN=OR8H2 PE=3 SV=1	122	RYAAICSPLHYTVIMSKRLCLALITGPYVIG
0.1	Q8NH02	sp|Q8NH02|O2T29_HUMAN Olfactory receptor 2T29 OS=Homo sapiens OX=9606 GN=OR2T29 PE=3 SV=2	126	RYVAICHPLRYPVLMNHRVCLFLASGCWFLG
0.1	Q8NGB8	sp|Q8NGB8|O4F15_HUMAN Olfactory receptor 4F15 OS=Homo sapiens OX=9606 GN=OR4F15 PE=2 SV=1	79	PKMICDIFKKHKAISFRGCITQIFFSHALGG
0.1	Q8N130	sp|Q8N130|NPT2C_HUMAN Sodium-dependent phosphate transport protein 2C OS=Homo sapiens OX=9606 GN=SLC34A3 PE=1 SV=2	293	GPCTEKNSTAPADRLPCRHLFAGTELTDLAV
0.1	O60669	sp|O60669|MOT2_HUMAN Monocarboxylate transporter 2 OS=Homo sapiens OX=9606 GN=SLC16A7 PE=1 SV=2	80	VNKYGSRPVVIAGGLLCCLGMVLASFSSSVV
0.1	Q29980	sp|Q29980|MICB_HUMAN MHC class I polypeptide-related sequence B OS=Homo sapiens OX=9606 GN=MICB PE=1 SV=2	330	CCKKKTSAAEGPELVSLQVLDQHPVGTGDHR
0.1	Q9NUT2	sp|Q9NUT2|MITOS_HUMAN Mitochondrial potassium channel ATP-binding subunit OS=Homo sapiens OX=9606 GN=ABCB8 PE=1 SV=3	266	FKLVISQGLRSCTQVAGCLVSLSMLSTRLTL
0.1	Q96N66	sp|Q96N66|MBOA7_HUMAN Lysophospholipid acyltransferase 7 OS=Homo sapiens OX=9606 GN=MBOAT7 PE=1 SV=2	64	IQAQPCSCHALALAWTFSYLLFFRALSLLGL
0.1	Q02978	sp|Q02978|M2OM_HUMAN Mitochondrial 2-oxoglutarate/malate carrier protein OS=Homo sapiens OX=9606 GN=SLC25A11 PE=1 SV=3	205	SKQFLLDSGYFSDNILCHFCASMISGLVTTA
0.1	Q99705	sp|Q99705|MCHR1_HUMAN Melanin-concentrating hormone receptor 1 OS=Homo sapiens OX=9606 GN=MCHR1 PE=1 SV=2	329	AICLVFFVCWAPYYVLQLTQLSISRPTLTFV
0.1	Q9UIQ6	sp|Q9UIQ6|LCAP_HUMAN Leucyl-cystinyl aminopeptidase OS=Homo sapiens OX=9606 GN=LNPEP PE=1 SV=3	131	LPRCTFTKEGCHKKNQSIGLIQPFATNGKLF
0.1	P55344	sp|P55344|LMIP_HUMAN Lens fiber membrane intrinsic protein OS=Homo sapiens OX=9606 GN=LIM2 PE=1 SV=2	32	RLSGSFAHQGLWRYCLGNKCYLQTDSIAYWN
0.1	Q9NPR2	sp|Q9NPR2|SEM4B_HUMAN Semaphorin-4B OS=Homo sapiens OX=9606 GN=SEMA4B PE=1 SV=4	742	NSMKVFLKQGECASVHPKTCPVVLPPETRPL
0.1	Q6Q0C1	sp|Q6Q0C1|S2547_HUMAN Solute carrier family 25 member 47 OS=Homo sapiens OX=9606 GN=SLC25A47 PE=2 SV=1	69	VSFGTYRHCLAHICRLRYGNPDAKPTKADIT
0.1	P51170	sp|P51170|SCNNG_HUMAN Amiloride-sensitive sodium channel subunit gamma OS=Homo sapiens OX=9606 GN=SCNN1G PE=1 SV=4	26	KELMRWYCLNTNTHGCRRIVVSRGRLRRLLW
0.1	P47804	sp|P47804|RGR_HUMAN RPE-retinal G protein-coupled receptor OS=Homo sapiens OX=9606 GN=RGR PE=1 SV=1	36	LTIFSFCKTPELRTPCHLLVLSLALADSGIS
0.1	Q9H490	sp|Q9H490|PIGU_HUMAN Phosphatidylinositol glycan anchor biosynthesis class U protein OS=Homo sapiens OX=9606 GN=PIGU PE=1 SV=3	141	ALFYLLNPYTILSCVAKSTCAINNTLIAFFI
0.1	Q9Y5I1	sp|Q9Y5I1|PCDAB_HUMAN Protocadherin alpha-11 OS=Homo sapiens OX=9606 GN=PCDHA11 PE=2 SV=1	721	WWSATPTEGACAPGKPTLVCSRAVGSWSYSQ
0.1	Q6IF42	sp|Q6IF42|OR2A2_HUMAN Olfactory receptor 2A2 OS=Homo sapiens OX=9606 GN=OR2A2 PE=2 SV=2	121	RYVAICHPFQYTVIMSWRVCTILVLTSWSCG
0.1	Q8NGJ0	sp|Q8NGJ0|OR5A1_HUMAN Olfactory receptor 5A1 OS=Homo sapiens OX=9606 GN=OR5A1 PE=2 SV=1	163	ASSIFRLHFCGPNIINHFFCDLPPVLALSCS
0.1	Q8NGY0	sp|Q8NGY0|O10X1_HUMAN Olfactory receptor 10X1 OS=Homo sapiens OX=9606 GN=OR10X1 PE=3 SV=2	99	EDLLAKDRSISVTGCSLQMCFFLGLGGTNCI
0.1	Q9H8P0	sp|Q9H8P0|PORED_HUMAN Polyprenol reductase OS=Homo sapiens OX=9606 GN=SRD5A3 PE=1 SV=1	38	GLLPGCAIFQDLIRYGKTKCGEPSRPAACRA
0.1	Q8TDS5	sp|Q8TDS5|OXER1_HUMAN Oxoeicosanoid receptor 1 OS=Homo sapiens OX=9606 GN=OXER1 PE=1 SV=1	316	MASMVAFWLSACRSLDLCTQLFHGSLAFTYL
0.1	Q9NXG6	sp|Q9NXG6|P4HTM_HUMAN Transmembrane prolyl 4-hydroxylase OS=Homo sapiens OX=9606 GN=P4HTM PE=1 SV=2	37	GLGDGEDAPVRPLCKPRGICSRAYFLVLMVF
0.1	Q8NGD3	sp|Q8NGD3|OR4K5_HUMAN Olfactory receptor 4K5 OS=Homo sapiens OX=9606 GN=OR4K5 PE=3 SV=1	122	RYVAICKPLYYVVIMSRRTCTVLVMISWAVS
0.1	Q8NGI7	sp|Q8NGI7|O10V1_HUMAN Olfactory receptor 10V1 OS=Homo sapiens OX=9606 GN=OR10V1 PE=3 SV=3	123	QFIAICHPLRYRLIMSWSLCVELLVGSLVLG
0.1	Q8NHA6	sp|Q8NHA6|OR2W6_HUMAN Putative olfactory receptor 2W6 OS=Homo sapiens OX=9606 GN=OR2W6P PE=5 SV=1	128	RYAAVCKPLHYTIIMHPRLCGQLASVAWLSG
0.1	P0DKB6	sp|P0DKB6|MPC1L_HUMAN Mitochondrial pyruvate carrier 1-like protein OS=Homo sapiens OX=9606 GN=MPC1L PE=2 SV=1	74	RVQPRNLLLMACHCTNVMAQSVQASRYLLYY
0.1	Q68CQ1	sp|Q68CQ1|MROH7_HUMAN Maestro heat-like repeat-containing protein family member 7 OS=Homo sapiens OX=9606 GN=MROH7 PE=2 SV=4	787	MCPLPLNSNGAEMWRQLILCKPSCDVRDLLD
0.1	P16109	sp|P16109|LYAM3_HUMAN P-selectin OS=Homo sapiens OX=9606 GN=SELP PE=1 SV=3	742	GSAQTACQENGHWSTTVPTCQAGPLTIQEAL
0.1	Q96EX2	sp|Q96EX2|RNFT2_HUMAN RING finger and transmembrane domain-containing protein 2 OS=Homo sapiens OX=9606 GN=RNFT2 PE=2 SV=2	159	VICWLQKGLPFILILLAKLCFQHKLGIAVCI
0.1	Q8N6D2	sp|Q8N6D2|RN182_HUMAN E3 ubiquitin-protein ligase RNF182 OS=Homo sapiens OX=9606 GN=RNF182 PE=1 SV=1	215	FVSLVPSSLVILMVYGFCQCVCHEFLDCMAP
0.1	Q8NEB5	sp|Q8NEB5|PLPP5_HUMAN Phospholipid phosphatase 5 OS=Homo sapiens OX=9606 GN=PLPP5 PE=1 SV=2	115	RPDFFYRCFPDGLAHSDLMCTGDKDVVNEGR
0.1	Q6IEZ7	sp|Q6IEZ7|OR2T5_HUMAN Olfactory receptor 2T5 OS=Homo sapiens OX=9606 GN=OR2T5 PE=2 SV=1	126	RYVAICHPLRYPVLMNHRVCLFLASGCWFLG
0.1	Q96R84	sp|Q96R84|OR1F2_HUMAN Putative olfactory receptor 1F2 OS=Homo sapiens OX=9606 GN=OR1F2P PE=5 SV=2	121	RFVAVCRPLHYTAKMIHQLCALLVTGSWVVA
0.1	Q7Z429	sp|Q7Z429|LFG1_HUMAN Protein lifeguard 1 OS=Homo sapiens OX=9606 GN=GRINA PE=1 SV=1	198	WTYYVSYAVFFISLIVLSCCGDFRRKHPWNL
0.1	Q92729	sp|Q92729|PTPRU_HUMAN Receptor-type tyrosine-protein phosphatase U OS=Homo sapiens OX=9606 GN=PTPRU PE=1 SV=2	720	CIRIARKAACKESKRPLEVSQRSEEMGLILG
0.1	Q04941	sp|Q04941|PLP2_HUMAN Proteolipid protein 2 OS=Homo sapiens OX=9606 GN=PLP2 PE=1 SV=1	1	MADSERLSAPGCWAACTNFSRTRKGILLFAE
0.1	Q13563	sp|Q13563|PKD2_HUMAN Polycystin-2 OS=Homo sapiens OX=9606 GN=PKD2 PE=1 SV=3	476	CEIIFCFFIFYYVVEEILEIRIHKLHYFRSF
0.1	Q15546	sp|Q15546|PAQRB_HUMAN Monocyte to macrophage differentiation factor OS=Homo sapiens OX=9606 GN=MMD PE=1 SV=2	51	RLSDDCWEKITAWIYGMGLCALFIVSTVFHI
0.1	Q8NGT9	sp|Q8NGT9|OR2A1_HUMAN Olfactory receptor 2A1/2A42 OS=Homo sapiens OX=9606 GN=OR2A1 PE=3 SV=2	84	LLHPAKPISFAGCMTQTFLCLSFGHSECLLL
0.1	Q8NGR8	sp|Q8NGR8|OR1L8_HUMAN Olfactory receptor 1L8 OS=Homo sapiens OX=9606 GN=OR1L8 PE=2 SV=1	123	RYVAVCDPFHYVTTMSHHHCVLLVAFSCSFP
0.1	O14718	sp|O14718|OPSX_HUMAN Visual pigment-like receptor peropsin OS=Homo sapiens OX=9606 GN=RRH PE=1 SV=1	243	VIMICMFLVAWSPYSIVCLWASFGDPKKIPP
0.1	Q9H210	sp|Q9H210|OR2D2_HUMAN Olfactory receptor 2D2 OS=Homo sapiens OX=9606 GN=OR2D2 PE=2 SV=4	53	SQLHTPMYFFLCNLSLADLCFSTNIVPQALV
0.1	Q8NH48	sp|Q8NH48|OR5B3_HUMAN Olfactory receptor 5B3 OS=Homo sapiens OX=9606 GN=OR5B3 PE=3 SV=1	51	SCLHNPMYFFLSNLSLVDFCYSSAVTPIVMA
0.1	Q8NGJ4	sp|Q8NGJ4|O52E2_HUMAN Olfactory receptor 52E2 OS=Homo sapiens OX=9606 GN=OR52E2 PE=3 SV=2	162	ILLILRLPFCGNHVIPHTYCEHMGLAHLSCA
0.1	Q8NGL3	sp|Q8NGL3|OR5DE_HUMAN Olfactory receptor 5D14 OS=Homo sapiens OX=9606 GN=OR5D14 PE=3 SV=1	88	VMADKSIFYFSCMMQYFLSCTAVVTESFLLA
0.1	Q8N146	sp|Q8N146|OR8H3_HUMAN Olfactory receptor 8H3 OS=Homo sapiens OX=9606 GN=OR8H3 PE=3 SV=1	84	ANLLTSNYISFTGCFAQMFCFVFLGTAECYL
0.1	Q8NGI6	sp|Q8NGI6|OR4DA_HUMAN Olfactory receptor 4D10 OS=Homo sapiens OX=9606 GN=OR4D10 PE=2 SV=1	160	ISLLLPLPFCGPNVLDTFYCDVHRVLKLAHT
0.1	Q8NHA4	sp|Q8NHA4|O2AE1_HUMAN Olfactory receptor 2AE1 OS=Homo sapiens OX=9606 GN=OR2AE1 PE=2 SV=1	87	SGKKSISFVGCATQHFLYLCLGGAECFLLAV
0.1	P47888	sp|P47888|OR3A3_HUMAN Olfactory receptor 3A3 OS=Homo sapiens OX=9606 GN=OR3A3 PE=2 SV=3	120	DCFLLTAMAYDRLLAICQPLTYSTRMSQTVQ
0.1	Q15743	sp|Q15743|OGR1_HUMAN Ovarian cancer G-protein coupled receptor 1 OS=Homo sapiens OX=9606 GN=GPR68 PE=1 SV=1	53	RNELGVYLCNLTVADLFYICSLPFWLQYVLQ
0.1	P48146	sp|P48146|NPBW2_HUMAN Neuropeptides B/W receptor type 2 OS=Homo sapiens OX=9606 GN=NPBWR2 PE=1 SV=2	263	LVVLAVCLLCWTPFHLASVVALTTDLPQTPL
0.1	Q7RTP0	sp|Q7RTP0|NIPA1_HUMAN Magnesium transporter NIPA1 OS=Homo sapiens OX=9606 GN=NIPA1 PE=1 SV=1	111	SYLLKEKLNILGKLGCLLSCAGSVVLIIHSP
0.1	Q8N4F7	sp|Q8N4F7|RN175_HUMAN RING finger protein 175 OS=Homo sapiens OX=9606 GN=RNF175 PE=1 SV=2	211	FYSVSRLPTRSLSDNICAVCGQKIIVELDEE
0.1	O75783	sp|O75783|RHBL1_HUMAN Rhomboid-related protein 1 OS=Homo sapiens OX=9606 GN=RHBDL1 PE=1 SV=1	175	YEILPCEVDRRWYFYRHRSCPPPVFMASVTL
0.1	P28328	sp|P28328|PEX2_HUMAN Peroxisome biogenesis factor 2 OS=Homo sapiens OX=9606 GN=PEX2 PE=1 SV=2	119	RCYDLFRNHHLASFGKVKQCVNFVIGLLKLG
0.1	Q96R27	sp|Q96R27|OR2M4_HUMAN Olfactory receptor 2M4 OS=Homo sapiens OX=9606 GN=OR2M4 PE=2 SV=2	122	RYVAICHPLQYTILMNPKLCVFMTVASWTLG
[truncated: 3,183 more rows]
